# Supplementary material for: Genetic analysis of the Arabidopsis TIR1/AFB auxin receptors reveals both overlapping and specialized functions
Source: eLife. 2020 Feb 18;9:e54740. doi: 10.7554/eLife.54740 (PMC7048394; doi:10.7554/eLife.54740)
Supplement: Figure 1—figure supplement 2—source data 1. [file elife-54740-fig1-figsupp2-data1.xlsx]

## Sheet: Figure 1—figure supplement 2B
	Root growth on No IAA Control							Root growth on 10nM IAA Control							Root growth on 40nM IAA Control
	Col-0	tir1-1	tir1-1/+	tir1-10	tir1-10/+	tir1-9	tir1-9/+	Col-0	tir1-1	tir1-1/+	tir1-10	tir1-10/+	tir1-9	tir1-9/+	Col-0	tir1-1	tir1-1/+	tir1-10	tir1-10/+	tir1-9	tir1-9/+
Mean (cm)	2.51164	2.53241	2.75811	2.57343	2.92774	2.44459	2.97344	1.53869	1.97254	1.96631	1.93757	1.93868	1.84928	2.02194	0.583465	1.03621	0.842485	1.06038	0.94585	1.01924	0.853367
SD (cm)	0.234489	0.318093	0.279303	0.207349	0.192362	0.388201	0.238078	0.204406	0.218202	0.154225	0.208202	0.359785	0.309529	0.289349	0.139056	0.205308	0.117487	0.191529	0.152144	0.139381	0.212832
n	31	31	31	31	30	31	31	22	27	24	31	28	29	29	21	28	29	23	20	22	22
plate A (pix)	539.999	425.927	611.004	524.773	687.46	674.564	805.357	378.054	438.535	369.276	488.276	547.761	466.428	525.223	182.481	273.002	173.16	312.43	290.092	237.503	197.44
	543.349	623.787	579.599	615.312	686.6	613.158	751.816	415.379	567.031		480.236	575.128	429.03	519.335		257.694	222.65	303.684	252.772	288.618	244.508
	513.987	544.91	686.522	507.942	779.989	624.611	788.044	447.079		396.545	453.395	508.33	512.819	510.303		291.91	208.466	280.078	210.552		273.566
	473.52	590.663	713.529	632.041	666.634	620.496	729.738	446.683	438.126	482.24	400.508	550.633	531.483	549.675	182.038	294.958	226.039	271.91	219.064	273.235	222.695
					739.142	618.585	676.244					523.285	560.281	529.915					220.651	247.964	265.116
plate B	578.21	585.664	582.741	581.386	710.125	677.53	632.884			466.56	466.987	478.517	437.402	411.219	168.338	316.425	121.998	294.343	170.144	231.069
	561.031	635.612	710.866	676.338	683.485	596.389	716.074		403.577	516.661	426.236	497.262	420.968	413.386		254.772	155.932	282.148	249.281	256.368
	563.275	505.577	574.872	642.439	675.452	741.846	682.57			490.135	483.107	515.396	411.236	361.266	216.714	221.771	225.99	271.146	265.745	229.616	247.756
	655.133	444.094	506.662	677.046	765.362	677.417	676.718				434.549	553.329	467.498		90.804	272.198	171.775	260.033	240.574	224.06	246.556
				619.197	695.774	567.877				454.323	476.229	513.436	444.98			121.998		270.478
plate C	568.991	599.597	679.507	618.072	646.064	409.839	674.137		394.141		496.387	391.663	364.15	486.159		322.698	219.588	169.22	219.182
	593.03	589.72	648.315	594.957	742.238	488.701	718.199		486.765		432.692	499.501	341.293			284.591	180.34	158.06			140.665
	627.343	657.337	688.732	636.649	696.793	512.342	683.412		547.789		457.855	532.835	291.183	425.537	181.984		237.639	238.435	208.38	263.87
	486.277	560.544	753.553	609.306	710.493	537.712	681.422		503.245		465.017	536.348	428.227	427.19		223.394	199.409	222.448	255.555		110.326
			644.587	631.264	714.368						526.529	530.133					210.516	275.447	259.113
plate D	609.377	631.543	630.777	599.902	688.399	612.775	635.791	348.942	464.648	466.088	394.453		354.329	346.452		230.026	207.327	216.875	158.515
	526.264	567.011	578.565	653.602	655.914	530.789	609.106	330.826	517.787	469.385	392.113		346.77	326.969		316.271	227.54	280.325	186.469	217.5
	654.625	578.285	703.447	674.662	629.376	640.449	761.757	284.925	413.868	447.581	410.72	291.497		544.298		247.735	196.001	263.258	198.403	207.656
	673.211	700.407	727.829	567.25	720.247	588.643	729.638	345.01	440.476	487.288	379.521	314.681	400.846	350.93	138.78	282.911	188.282	248.317	200.027	212.377
		657.868	541.467	648.474					373.133	445.003	459.004	317.194				245.525	179.729	211.196
plate E	612.535	627.045	800.666	535.965	655.313	525.837	741.759	320.178	449.951	479.916	544.605	388.592	329.409	473.047	90.602	183.739	184.46				169.055
	631.899	681.523	635.165	535.992	600.098	498.326	763.453	307.195	539.311	512.78	461.649	443.663	496.203	546.49	117.833	284.058	205.446				176.951
	610.86	582.858	733.126	611.655	703.733	449.267	584.851	397.767	462.345	479.923	378.537	393.912	525.999	501.133	114.714	275.513	201.078	195.943	170.087	280.804	215.399
	561.863	618.28	573.326	569.558	581.798	408.997	689.206	354.504	461.836	475.306	521.41	467.203	446.035	482.677	136.54	174.542	223.923			214.032
	612.086	764.407	735.851						467.5	417.421					100.402	183.714	254.499			280.804
plate F	562.596	645.37	642.41	604.583	675.248	565.457	681.398	263.959	472.837	464.582	446.64		394.664	500.765	111.24	235.849				234.9	143.023
	534.623	717.603	627.52	594.78	678.041	620.6	698.096	332.967	476.792	489.686	499.455		400.39	558.45	127.12	192.331	195.362			187.972	154.468
	689.535	585.262	662.163	661.529		452.797	744.259	368.69	476.931	495.93	475.438	469.348	327.417	449.511	137.359	222.085	193.472			238.058	158.162
	592.713	583.781	662.995	598.461	737.253	468.218	755.39	357.497	430.505	501.1	516.958	456.915		501.651	123.741	199.559		263.902		267.517	194.071
	607.351	675.755					800.285	354.424	413.335					457.924		218.805					105.741
plate G	678.226	610.78	642.577	572.778	701.021	527.459	617.965	383.697	504.513	436.701	460.807	327.264	517.989	501.086	147.478	225.616	218.769				221.417
	628.568	480.133	662.129	709.037	744.003	706.564	750.609	372.955	476.041	415.377	377.745	347.671	478.553	530.75	143.91		206.984		237.181		245.453
	653.02	527.184	626.727	602.048	734.563	586.345	673.155	368.965	560.926	487.76	559.743	360.073	523.558	516.69	116.928		162.75	303.402	256.794	161.837	260.507
	642.593	545.871	629.982	537.791	642.744	768.242	656.169	443.84	398.802		421.711	491.163	522.701	554.238	125.313		172.231	168.026		261.308	230.687
	606.265					589.511	664.54	372.816					496.469	548.835	140.036					279.789	211.257
% of control	1	1	1	1	1	1	1	0.612623	0.778918	0.712917	0.752914	0.662176	0.756479	0.68	0.379196	0.409181	0.305457	0.412048	0.323065	0.416938	0.286996
SE of ratio	0.0237136	0.0319047	0.0257216	0.0204656	0.0169645	0.0403352	0.0203373	0.0201639	0.0241611	0.0172745	0.0181621	0.0245446	0.0319115	0.0205465	0.0126939	0.0178873	0.00966609	0.016625	0.0122492	0.0170051	0.0158087
