# Supplementary material for: Genetic analysis of the Arabidopsis TIR1/AFB auxin receptors reveals both overlapping and specialized functions
Source: eLife. 2020 Feb 18;9:e54740. doi: 10.7554/eLife.54740 (PMC7048394; doi:10.7554/eLife.54740)
Supplement: Figure 5—figure supplement 1—source data 1. [file elife-54740-fig5-figsupp1-data1.xlsx]

## Sheet: Figure 5—figure supplement 1
Raw measurements from ImageJ. Length in pixels from growth during treatment. Scans = 600 dpi												Data arranged in columns, converted to mm, ratio calculations																t-tests
	Plate 1A control						Plate 1B control					Control								20µM Picloram
Col	510.552		4C#3	568.453		Col	539.234		4C#3	575.915		Col	afb5-5	afb4-8 afb5-5	4C#1	4C#3	4C#9	4T#1	4T#16	Col	afb5	afb45	4C#1	4C#3	4C#9	4T#1	4T#16
2	510.62		2	544.972		2	556.293		2	647.597	mean	22.1275	23.5844	22.191	21.5359	24.1414	22.1419	22.4983	24.3179	4.25272	14.3182	19.4513	9.21088	3.13375	10.6564	11.571	2.17907		Col-C	afb5-C	afb45-C	4C1-C	4C3-C	4C9-C	4T1-C	4T16-C	Col-Pic	afb5-Pic	afb45-Pic	4C1-Pic	4C3-Pic	4C9-Pic	4T1-Pic
3	485.88		3	439.489		3	516.163		3	575.809	SD	1.2675	1.67037	2.20536	1.81981	1.9119	4.32291	1.67417	3.47559	1.50339	1.26113	1.4116	0.930245	1.21642	1.72346	1.4548	1.47288	afb5-C	0.0104522															afb5-C
4			4	587.169		4	539.031		4	603.294	n	15	16	16	16	16	16	16	16	16	16	16	16	15	16	16	16	afb45-C	0.921944	0.0536554														afb45-C
afb5	614.679		4C#9	548.254		afb5	516.519		4C#9	503.746		510.552	614.679	468.102	526.226	568.453	548.254	554.037	616.13	71.443	346.583	503.758	202.835	98.35	258.774	306.329	61.224	4C1-C	0.300537	0.00240385	0.366989													4C1-C
6	546.351		6	592.982		6	597.279		6	334.801		510.62	546.351	518.683	510.092	544.972	592.982	530.682	477.359	75.944	346.599	473.154	260.115	127.146	279.268	246.567	8.491	4C3-C	0.00178714	0.387258	0.0121415	0.000441263												4C3-C
7	584.359		7	483.368		7	558.935		7	687.486		485.88	584.359	508.067	523.261	439.489	483.368	457.078	590.643	103.279	321.761	446.944	261.101	96.909	220.588	252.034	30.335	4C9-C	0.990002	0.227955	0.968058	0.61093	0.105666											4C9-C
8	561.839		8	589.998		8	531.314		8	354.435			561.839	399.916	587.809	587.169	589.998	501.582	578.199	165.837	373.987	469.498	202.966	93.272	302.082	256.778	30.167	4T1-C	0.491084	0.0761305	0.660529	0.130087	0.0148952	0.761722										4T1-C
afb45	468.102		4T#1	554.037		afb45	637.268		4T#1	495.32		539.234	516.519	637.268	465.411	575.915	503.746	495.32	528.53	101.435	376.984	487.401	216.135		306.044	249.726	4	4T16-C	0.0484036	0.454956	0.0490844	0.00943639	0.860265	0.127565	0.0727087									4T16-C
10	518.683		10	530.682		10	537.13		10	526.662		556.293	597.279	537.13	530.807	647.597	334.801	526.662	571.325	145.218	381.99	452.327	200.395	78.699	220.417	235.913	15	Col-Pic	2.18871e-25	1.79714e-25	9.57355e-21	4.49252e-23	4.21126e-24	3.84804e-12	1.01136e-24	2.21679e-15								Col-Pic
11	508.067		11	457.078		11	533.84		11	609.196		516.163	558.935	533.84	553.744	575.809	687.486	609.196	661.048	93.604	369.53	463.675	189.199	5.69	210.867	316.576	128.208	afb5-Pic	1.07481e-16	1.03572e-16	6.90085e-12	4.29345e-13	1.09181e-15	1.97761e-06	2.61343e-15	1.56346e-09	7.35432e-19							afb5-Pic
12	399.916		12	501.582		12	603.988		12	577.527		539.031	531.314	603.988	488.924	603.294	354.435	577.527	626.529	107.644	330.303	515.663	223.085	94.128	303.511	265.806	27.303	afb45-Pic	5.37963e-06	2.37004e-08	0.000296933	0.00113971	1.48482e-08	0.0292571	5.17577e-06	4.58225e-05	1.20229e-23	7.77465e-12						afb45-Pic
4C#1	526.226		4T#16	616.13		4C#1	465.411		4T#16	528.53		574.343	521.897	554.119	521.765	545.056	392.254	486.823	707.903	108.387	308.883	481.529	233.407	54.405	255.77	293.699	38.194	4C1-Pic	3.08029e-22	2.92889e-20	1.86839e-15	1.71588e-17	1.44202e-18	2.26902e-09	1.91515e-19	4.43674e-12	2.97599e-11	2.59182e-13	2.37039e-19					4C1-Pic
14	510.092		14	477.359		14	530.807		14	571.325		580.403	544.292	535.521	517.698	586.62	516.809	507.1	597.869	139.884	365.104	493.688	236.624	85.598	291.877	240.382	76.592	4C3-Pic	9.12203e-27	1.40931e-25	2.42382e-20	4.93322e-23	1.0801e-23	2.81755e-12	6.61395e-25	3.21987e-15	0.0300025	3.19592e-21	5.37824e-25	9.50582e-15				4C3-Pic
15	523.261		15	590.643		15	553.744		15	661.048		514.61	650.057	537.615	519.462	597.262	633.603	507.397	509.127	68.764	311.618	422.991	226.571	66.634	170.291	293.431	72.498	4C9-Pic	1.42474e-18	8.56137e-20	4.6631e-16	3.61824e-17	2.4435e-19	4.66669e-09	1.03184e-18	1.78368e-12	3.88351e-12	2.07398e-07	9.63219e-16	0.00713454	5.5922e-14			4C9-Pic
16	587.809		16	578.199		16	488.924		16	626.529		509.007	566.727	518.09	468.556	601.799	643.611	532.124	367.421	33.701	304.032	456.46	196.409	45.805	274.373	219.795	84.283	4T1-Pic	2.39156e-19	1.16737e-19	5.10917e-15	1.45193e-16	1.21818e-18	2.38403e-08	1.68104e-18	1.47021e-11	1.11714e-14	3.39386e-06	6.83071e-16	1.04714e-05	7.17056e-17	0.115539		4T1-Pic
												484.601	504.7	513.984	433.797	521.504	549.08	526.283	633.922	84.765	340.167	391.04	206.166	80.307	236.735	332.05	55.684	4T16-Pic	6.08764e-27	8.77174e-27	7.32955e-22	1.97187e-24	3.12488e-25	6.27221e-13	4.20809e-26	3.85738e-16	0.000449081	2.45384e-21	1.96292e-25	7.64006e-15	0.0582925	2.99503e-15	1.00921e-17	4T16-Pic
	Plate 1C control						Plate 1D control					489.303	567.437	501.528	434.701	579.087	548.214	561.18	512.963	58.357	312.509	435.827	212.519	69.861	265.681	296.789	104.271
Col	574.343		4C#3	545.056		Col	484.601		4C#3	521.504		526.635	525.519	517.737	494.763	587.411	436.827	546.629	641.66	104.123	338.424	420.146	191.904	48.57	231.041	317.72	42.09
2	580.403		2	586.62		2	489.303		2	579.087		503.778	521.876	501.555	562.528	562.868	553.106	583.657	570.391	144.944	283.124	437.556	221.845	65.009	200.287	249.693	45.245
3	514.61		3	597.262		3	526.635		3	587.411
4	509.007		4	601.799		4	503.778		4	562.868
afb5	521.897		4C#9	392.254		afb5	504.7		4C#9	549.08
6	544.292		6	516.809		6	567.437		6	548.214		Col-0	afb5-5	afb4-8 afb5-5	AFB4-mCitrine#1 afb45	AFB4-mCitrine#3 afb45	AFB4-mCitrine#9 afb45	AFB4-tdTomato#1 afb45	AFB4-tdTomato#16 afb45
7	650.057		7	633.603		7	525.519		7	436.827	% growth	0.192192	0.607105	0.876539	0.427699	0.129808	0.481277	0.514306	0.0896076
8	566.727		8	643.611		8	521.876		8	553.106	SE of ratio	0.0172217	0.0171542	0.0269661	0.0140801	0.0132614	0.0305038	0.0187849	0.0154767
afb45	554.119		4T#1	486.823		afb45	513.984		4T#1	526.283
10	535.521		10	507.1		10	501.528		10	561.18
11	537.615		11	507.397		11	517.737		11	546.629
12	518.09		12	532.124		12	501.555		12	583.657
4C#1	521.765		4T#16	707.903		4C#1	433.797		4T#16	633.922
14	517.698		14	597.869		14	434.701		14	512.963
15	519.462		15	509.127		15	494.763		15	641.66
16	468.556		16	367.421		16	562.528		16	570.391
	Plate 1A Pic						Plate 1B Pic
Col	71.443		4C#3	98.35		1	101.435		4C#3	0
2	75.944		2	127.146		Col	145.218		2	78.699
3	103.279		3	96.909		3	93.604		3	5.69
4	165.837		4	93.272		4	107.644		4	94.128
afb5	346.583		4C#9	258.774		afb5	376.984		4C#9	306.044
6	346.599		6	279.268		6	381.99		6	220.417
7	321.761		7	220.588		7	369.53		7	210.867
8	373.987		8	302.082		8	330.303		8	303.511
afb45	503.758		4T#1	306.329		afb45	487.401		4T#1	249.726
10	473.154		10	246.567		10	452.327		10	235.913
11	446.944		11	252.034		11	463.675		11	316.576
12	469.498		12	256.778		12	515.663		12	265.806
4C#1	202.835		4T#16	61.224		4C#1	216.135		4T#16	4
14	260.115		14	8.491		14	200.395		14	15
15	261.101		15	30.335		15	189.199		15	128.208
16	202.966		16	30.167		16	223.085		16	27.303
	Plate 1C Pic						Plate 1D Pic
Col	108.387		4C#3	54.405		Col	84.765		4C#3	80.307
2	139.884		2	85.598		2	58.357		2	69.861
3	68.764		3	66.634		3	104.123		3	48.57
4	33.701		4	45.805		4	144.944		4	65.009
afb5	308.883		4C#9	255.77		afb5	340.167		4C#9	236.735
6	365.104		6	291.877		6	312.509		6	265.681
7	311.618		7	170.291		7	338.424		7	231.041
8	304.032		8	274.373		8	283.124		8	200.287
afb45	481.529		4T#1	293.699		afb45	391.04		4T#1	332.05
10	493.688		10	240.382		10	435.827		10	296.789
11	422.991		11	293.431		11	420.146		11	317.72
12	456.46		12	219.795		12	437.556		12	249.693
4C#1	233.407		4T#16	38.194		4C#1	206.166		4T#16	55.684
14	236.624		14	76.592		14	212.519		14	104.271
15	226.571		15	72.498		15	191.904		15	42.09
16	196.409		16	84.283		16	221.845		16	45.245
