# Supplementary material for: Genetic analysis of the Arabidopsis TIR1/AFB auxin receptors reveals both overlapping and specialized functions
Source: eLife. 2020 Feb 18;9:e54740. doi: 10.7554/eLife.54740 (PMC7048394; doi:10.7554/eLife.54740)
Supplement: Figure 6—figure supplement 2—source data 1. [file elife-54740-fig6-figsupp2-data1.xlsx]

## Sheet: Figure 6—figure supplement 4
Line	Line #	Parent #
Col-0	3591	3442p5
afb12345	3592	3444p4
tir1afb1345	3593	3445p5
tir1afb345	3594	3446p5
tir1afb134	3595	3447p5
tir1afb135	3596	3448p5
afb1345	3597	2958i
afb1245	3598	2276b
afb1245	3599	1667c
tir1afb23	3600	3443p2
tir1afb1245	3601	3449ind
tir1afb245	3602	3450p3
tir1afb125	3603	1717p4
tir1afb124	3604	1713p5
Col-0 Control	0	10	20	30	40	50	60	70	80	90	100	110	120	130	140	150	160	170	180
pixels	214.189	214.149	214.189	215.149	215.084	214.234	214.189	214.283	215.188	215.149	215.188	216.187	215.232	216.187	216.187	216.231	216.231	216.231	216.231	0	-0.03969	0	0.95962	0.89453	0.04435	0	0.09335	0.99912	0.95962	0.99912	1.99825	1.04326	1.99825	1.99825	2.04219	2.04219	2.04219	2.04219
	162.742	163.248	162.607	162.607	163.248	163.248	163.893	164.015	164.015	164.015	164.015	164.657	164.149	164.657	164.657	164.785	164.785	164.785	164.924	0	0.50615	-0.13524	-0.13524	0.50615	0.50615	1.15113	1.27311	1.27311	1.27311	1.27311	1.91509	1.40719	1.91509	1.91509	2.04258	2.04258	2.04258	2.1821
	220.436	220.077	220.844	220.077	220.638	220.844	220.844	220.638	220.638	221.219	221.416	220.844	220.844	221.416	221.416	221.054	221.416	221.416	220.844	0	-0.35867	0.40791	-0.35867	0.20178	0.40791	0.40791	0.20178	0.20178	0.78342	0.97997	0.40791	0.40791	0.97997	0.97997	0.61836	0.97997	0.97997	0.40791
	129.988	130.553	129.988	130.115	130.25	130.115	130.115	130.863	130.752	130.553	130.648	130.863	130.863	130.648	130.863	130.752	130.981	130.981	130.863	0	0.56421	0	0.12687	0.2613	0.12687	0.12687	0.87406	0.76321	0.56421	0.65992	0.87406	0.87406	0.65992	0.87406	0.76321	0.99245	0.99245	0.87406
	158.773	159.154	159.154	159.013	159.154	158.773	158.773	159.013	159.154	159.154	159.154	159.154	159.013	158.773	159.013	159.411	159.411	159.411	159.411	0	0.38059	0.38059	0.23916	0.38059	0	0	0.23916	0.38059	0.38059	0.38059	0.38059	0.23916	0	0.23916	0.638	0.638	0.638	0.638
	166.604	166.712	167.362	167.171	167.362	167.362	167.362	167.362	167.836	168.122	168.015	168.015	168.015	168.241	168.772	169.177	169.177	169.248	169.177	0	0.10801	0.75756	0.56625	0.75756	0.75756	0.75756	0.75756	1.23191	1.51766	1.41056	1.41056	1.41056	1.63658	2.16772	2.5731	2.5731	2.64402	2.5731
	153.834	153.183	153.183	153.183	154.055	154.055	154.175	154.175	154.302	155.724	154.302	155.724	155.724	155.724	155.824	155.824	155.929	156.042	156.042	0	-0.65143	-0.65143	-0.65143	0.22085	0.22085	0.34089	0.34089	0.46732	1.88979	0.46732	1.88979	1.88979	1.88979	1.98929	1.98929	2.09514	2.20733	2.20733
	245.937	245.937	245.693	245.204	245.447	245.937	245.937	245.447	246.175	246.416	246.662	246.662	246.662	246.911	247.386	247.631	247.881	247.386	247.881	0	0	-0.24408	-0.73298	-0.49045	0	0	-0.49045	0.23775	0.47933	0.72473	0.72473	0.72473	0.97394	1.44936	1.69379	1.94404	1.44936	1.94404
	97.6217	97.0155	97.5141	97.6217	97.7395	97.6217	97.7395	97.7395	97.7395	97.7395	97.7395	98.5089	98.4124	98.4124	98.5089	98.6154	98.4124	98.5089	98.4124	0	-0.60626	-0.10762	0	0.11773	0	0.11773	0.11773	0.11773	0.11773	0.11773	0.88716	0.79068	0.79068	0.88716	0.99369	0.79068	0.88716	0.79068
	145.169	145.169	144.281	145.169	145.169	145.221	145.279	146.168	146.123	146.219	146.168	146.219	146.168	146.219	147.167	147.167	147.167	147.167	147.167	0	0	-0.88789	0	0	0.05165	0.11017	0.99884	0.95437	1.05014	0.99884	1.05014	0.99884	1.05014	1.9977	1.9977	1.9977	1.9977	1.9977
																			Col-0 Control	0	-0.205507	-1.01642	0.0287443	6.03258	4.47747	6.37595	9.3261	14.0269	19.083	16.9585	24.4227	20.7141	25.1764	30.6869	32.4949	34.0695	33.6143	33.1409
																			µm	0	2.86791	3.28234	3.47327	2.61628	1.75471	2.55983	3.52234	2.91996	3.67398	2.7194	4.11325	3.30053	4.36935	4.43905	4.77058	4.56877	4.58166	5.30033
																				0	9.06913	10.3797	10.9834	8.27341	5.54889	8.0949	11.1386	9.23371	11.6182	8.5995	13.0073	10.4372	13.8171	14.0375	15.0859	14.4477	14.4885	16.7611
																				10	10	10	10	10	10	10	10	10	10	10	10	10	10	10	10	10	10	10
Col-0 5µM NAA
	160.462	161.385	162.693	164.924	166.235	169	171.231	172.54	174.244	175.96	177.395	179.109	179.769	180.942	181.86	182.387	182.387	183.308	183.698	0	0.9228	2.23113	4.4624	5.77294	8.53817	10.769	12.078	13.7823	15.4984	16.9332	18.6471	19.3075	20.4802	21.398	21.9251	21.9251	22.8467	23.2363
	110.494	110.571	111.4	112.805	114.543	116.362	118.186	119.867	121.248	122.156	123.471	123.976	125.24	125.718	125.718	126.59	127.047	127.941	127.953	0	0.0769	0.90584	2.3108	4.04823	5.86717	7.69195	9.37225	10.7533	11.6613	12.9763	13.4815	14.7454	15.2236	15.2236	16.0956	16.5529	17.4471	17.4588
	267.619	267.619	271.448	275.191	279.902	282.719	284.623	286.833	288.092	289.665	291.254	292.851	294.109	295.368	296.319	297.579	298.53	299.481	300.128	0	0	3.82884	7.57171	12.2826	15.0998	17.0034	19.2136	20.4729	22.0462	23.6351	25.2324	26.4897	27.7484	28.7	29.9594	30.9106	31.8621	32.5092
	200.34	200.562	203.868	206.635	209.404	211.078	214.14	215.523	217.745	219.429	221.057	222.191	223.877	224.956	226.338	226.638	227.482	228.327	229.172	0	0.222	3.52789	6.29523	9.06421	10.7385	13.8004	15.1829	17.4056	19.0891	20.7168	21.8517	23.5375	24.6158	25.9985	26.2988	27.1422	27.9868	28.8327
	250.954	250.954	253.19	255.362	257.661	260.757	261.63	264.756	267.032	269.742	271.015	272.809	275.045	275.601	277.281	277.723	278.643	280.863	281.78	0	0	2.23547	4.40831	6.70645	9.80241	10.6753	13.8023	16.0777	18.7883	20.0606	21.8553	24.0913	24.647	26.3273	26.7687	27.689	29.9088	30.8259
	216.836	217.497	220.32	222.928	225.078	227.167	229.26	230.794	232.086	234.866	235.595	237.008	237.739	239.794	240.483	241.249	241.979	242.662	243.31	0	0.66079	3.48388	6.0919	8.24142	10.331	12.4233	13.9579	15.2498	18.0296	18.7586	20.1721	20.903	22.9573	23.6465	24.4125	25.143	25.826	26.4742
	125.399	125.483	126.479	129.314	130.553	133.634	137.615	139.703	142.506	144.42	144.779	145.993	147.574	147.868	149.482	149.656	150.479	150.748	150.748	0	0.08371	1.07989	3.91421	5.15331	8.23447	12.216	14.3039	17.1068	19.0202	19.3798	20.5938	22.1744	22.4688	24.0831	24.2569	25.0799	25.3488	25.3488
	133.094	133.184	135.093	137.233	139.359	142.225	144.499	146.277	148.273	149.335	150.403	151.4	152.329	152.555	154.208	155.116	154.467	156.157	156.259	0	0.09013	1.99861	4.13943	6.2653	9.13122	11.4052	13.1832	15.1795	16.2412	17.3088	18.3062	19.2346	19.461	21.1137	22.0221	21.3729	23.063	23.1654
	123.167	123.357	124.952	127.098	128.265	130.419	133.004	135.148	136.945	137.931	138.917	140.246	141.23	142.215	142.215	143.199	143.377	144.361	144.361	0	0.19065	1.78544	3.93184	5.0988	7.25201	9.83721	11.9815	13.7787	14.7646	15.7507	17.0797	18.0638	19.0481	19.0481	20.0326	20.2106	21.1941	21.1941
	175.454	174.957	176.876	180.754	183.981	187.04	189.275	190.118	190.184	191.094	192.419	194.165	195.494	195.98	196.474	198.635	197.687	199.489	199.123	0	-0.49656	1.42196	5.30028	8.52728	11.5864	13.8212	14.6647	14.7304	15.6405	16.9651	18.7112	20.0405	20.5259	21.0202	23.1816	22.2329	24.0357	23.6694
	157.08	157.762	159.226	162.114	164.939	167.171	169.994	172.743	174.155	175.568	176.309	177.138	178.55	178.645	179.961	180.712	181.373	181.466	182.124	0	0.68288	2.14665	5.03456	7.85978	10.091	12.9145	15.663	17.0755	18.488	19.2298	20.0588	21.4701	21.5653	22.8815	23.6329	24.2929	24.3867	25.044
	162.604	163.689	166.508	168.502	171.353	173.488	177.406	178.474	179.547	181.541	182.702	183.883	183.883	185.874	186.968	186.869	188.767	188.958	189.763	0	1.08492	3.90445	5.89842	8.74963	10.8839	14.8025	15.8703	16.9428	18.9368	20.0981	21.2793	21.2793	23.2698	24.3641	24.2651	26.1632	26.3539	27.1592
	184.773	185.154	187.182	189.615	192.388	195.167	196.655	197.952	199.251	200.552	202.04	204.267	205.565	206.129	207.634	208.355	209.287	209.859	210.219	0	0.38116	2.4089	4.84257	7.6148	10.3938	11.8817	13.1792	14.4783	15.7789	17.2668	19.4941	20.7922	21.3558	22.8615	23.5826	24.514	25.0866	25.4461
																			Col-0 5µM NAA	0	6.34899	50.4075	104.533	155.306	208.329	259.278	297.07	330.58	364.69	389.271	418.063	443.082	461.38	483.033	498.937	510.001	529.73	537.9
																				0	2.54795	5.95264	7.81934	12.7508	13.1795	13.8276	13.7603	13.7578	15.4502	15.4683	16.3518	17.153	18.1953	20.1769	19.6031	21.6212	21.7005	23.3329
																				0	9.18676	21.4625	28.193	45.9735	47.5193	49.8561	49.6134	49.6045	55.7066	55.7717	58.9574	61.8459	65.6042	72.7488	70.6801	77.9565	78.2421	84.128
																				13	13	13	13	13	13	13	13	13	13	13	13	13	13	13	13	13	13	13
																		elongation (NAA-ctl)	Col-0 5µM NAA	0	6.5545	51.4239	104.505	149.273	203.851	252.902	287.744	316.553	345.607	372.312	393.64	422.368	436.203	452.346	466.443	475.932	496.116	504.759
																			Standard Error of the Difference Between the Means	0	3.83627	6.79762	8.55603	13.0164	13.2958	14.0626	14.2039	14.0643	15.8811	15.7055	16.8612	17.4676	18.7126	20.6594	20.1753	22.0987	22.1789	23.9273
3592 Control
	131.366	131.366	130.729	131.503	131.503	131.503	132.136	132.136	132.008	132.136	132.654	132.91	133.417	132.91	133.544	133.544	133.417	133.544	133.544	0	0	-0.63717	0.13695	0.13695	0.13695	0.77039	0.77039	0.64168	0.77039	1.28778	1.54384	2.05074	1.54384	2.1781	2.1781	2.05074	2.1781	2.1781
	172.235	172.285	171.968	172.534	172.795	172.534	172.795	172.235	172.235	172.795	173.358	173.066	173.066	173.066	173.623	173.066	173.899	173.899	173.899	0	0.04935	-0.26728	0.29875	0.55938	0.29875	0.55938	0	0	0.55938	1.12271	0.83116	0.83116	0.83116	1.38786	0.83116	1.6641	1.6641	1.6641
	126.115	126.115	126.59	126.752	126.921	126.921	127.098	126.921	126.921	126.921	127.098	126.921	127.738	127.738	128.082	127.906	127.906	127.906	127.906	0	0	0.47486	0.6367	0.80621	0.80621	0.98336	0.80621	0.80621	0.80621	0.98336	0.80621	1.62298	1.62298	1.96697	1.79119	1.79119	1.79119	1.79119
	115.447	115.447	115.209	115.209	115.209	116.181	115.447	115.447	115.447	115.447	115.447	115.447	115.447	115.447	116.181	115.694	115.694	115.953	116.181	0	0	-0.23845	-0.23845	-0.23845	0.73393	0	0	0	0	0	0	0	0	0.73393	0.2466	0.2466	0.50562	0.73393
	189.188	189.423	189.932	189.932	189.708	189.932	189.932	189.932	189.932	189.932	189.932	189.932	189.932	189.932	190.465	190.683	190.465	190.16	190.394	0	0.23507	0.74383	0.74383	0.51993	0.74383	0.74383	0.74383	0.74383	0.74383	0.74383	0.74383	0.74383	0.74383	1.27748	1.49524	1.27748	0.97272	1.20659
	213.265	213.413	214.255	213.413	213.841	213.265	213.841	214.112	214.112	214.112	213.974	214.112	213.974	214.255	214.965	214.965	214.965	215.102	214.965	0	0.14766	0.98943	0.14766	0.57597	0	0.57597	0.84703	0.84703	0.84703	0.70921	0.84703	0.70921	0.98943	1.70002	1.70002	1.70002	1.83721	1.70002
	146.874	146.874	146.874	147.763	146.769	147.763	147.763	147.665	146.874	147.868	147.105	147.105	147.868	147.868	147.98	147.98	148.661	147.98	147.868	0	0	0	0.88922	-0.10557	0.88922	0.88922	0.79106	0	0.99408	0.2313	0.2313	0.99408	0.99408	1.10563	1.10563	1.78659	1.10563	0.99408
	140.73	141.039	141.683	141.354	141.683	141.683	141.989	142.338	141.989	141.989	141.989	141.989	141.989	142.636	142.636	142.636	142.636	142.636	142.941	0	0.30876	0.9525	0.62393	0.9525	0.9525	1.2592	1.60739	1.2592	1.2592	1.2592	1.2592	1.2592	1.90566	1.90566	1.90566	1.90566	1.90566	2.21031
																			3592 Control	0	1.96014	5.33855	8.56877	8.48498	12.0687	15.2965	14.7265	11.3717	15.8224	16.7677	16.5697	21.7255	22.8361	32.4264	29.7752	32.8675	31.6448	33.0156
																				0	0.92187	4.63944	2.84864	3.19187	2.75269	2.76663	3.84852	3.58788	2.72871	3.53381	3.72205	4.67561	4.51553	3.66482	4.77797	4.28962	4.26342	4.01649
																				0	2.60744	13.1223	8.05717	9.02796	7.78577	7.82522	10.8853	10.1481	7.71796	9.99514	10.5275	13.2246	12.7719	10.3657	13.5141	12.1329	12.0588	11.3603
																				8	8	8	8	8	8	8	8	8	8	8	8	8	8	8	8	8	8	8
3592 5µM NAA
	141.152	141.739	142.338	143.618	144.9	146.185	148.061	150.283	151.822	153.379	154.324	155.271	155.596	156.869	157.487	159.063	159.38	160.012	160.328	0	0.5868	1.18523	2.46515	3.74757	5.03241	6.9084	9.13067	10.6699	12.2262	13.1719	14.1183	14.4432	15.717	16.3341	17.9105	18.2277	18.8601	19.1754
	134.618	135.118	136.418	138.196	139.589	140.89	142.695	144.475	145.413	146.711	147.58	148.034	148.486	149.375	150.296	151.611	152.069	152.069	152.532	0	0.50049	1.80049	3.57753	4.9707	6.27205	8.0775	9.85693	10.7952	12.0926	12.9625	13.4158	13.8677	14.7574	15.6784	16.9934	17.4511	17.4511	17.914
	124.197	124.74	124.952	127.122	128.32	131.244	133.417	135.591	137.539	139.714	140.688	141.891	141.891	143.098	143.339	144.368	144.586	144.81	145.784	0	0.54231	0.75457	2.92457	4.12249	7.04663	9.21922	11.3939	13.3417	15.5166	16.4902	17.6934	17.6934	18.9005	19.1413	20.1702	20.3882	20.6128	21.5867
	237.609	238.537	238.606	240.468	240.601	241.599	241.671	242.745	244.818	246.587	247.73	248.582	249.65	249.65	250.577	251.575	251.645	252.507	252.573	0	0.92829	0.99745	2.85937	2.99241	3.98992	4.06234	5.1358	7.20938	8.97778	10.1208	10.9731	12.0408	12.0408	12.9684	13.9661	14.0357	14.8985	14.9638
	80.6536	81.0432	80.7775	82.0061	83.5225	83.9345	85.1646	85.44	86.8332	87.8009	88.7694	89.7385	89.9889	90.2497	90.7083	90.7083	91.214	91.444	91.6788	0	0.38962	0.12389	1.35252	2.86887	3.28092	4.51097	4.78646	6.17959	7.14733	8.11578	9.08493	9.33531	9.59607	10.0547	10.0547	10.5604	10.7904	11.0252
	84.386	84.386	85.0412	86.4523	87.2066	87.9659	89.3756	90.7855	91.4385	92.1954	92.8493	92.957	94.1754	94.2603	94.921	94.921	94.921	95.0158	95.0158	0	0	0.65515	2.06628	2.82063	3.57988	4.98959	6.39944	7.05248	7.80942	8.46332	8.57096	9.78935	9.87426	10.535	10.535	10.535	10.6298	10.6298
	161.199	161.969	163.248	164.657	166.712	168.772	170.836	173.658	175.824	177.8	179.134	179.961	180.712	181.373	181.959	182.784	182.877	183.535	184.859	0	0.77049	2.04964	3.45858	5.51369	7.5734	9.63754	12.4591	14.6251	16.6018	17.9354	18.7625	19.5138	20.1739	20.7601	21.5854	21.6784	22.3361	23.6608
	242.992	243.655	244.493	246.759	248.069	250.138	250.99	252.507	253.917	255.877	255.979	257.288	257.946	258.606	257.389	258.043	258.043	258.043	258.043	0	0.66372	1.50158	3.76722	5.07677	7.14619	7.99827	9.51566	10.9255	12.8852	12.9867	14.296	14.954	15.6141	14.397	15.0509	15.0509	15.0509	15.0509
	218.289	218.893	220.511	223.034	225.568	227.264	228.642	230.02	230.868	231.398	231.931	231.931	233.311	234.389	235.536	236.072	236.916	237.453	238.296	0	0.60387	2.22197	4.74483	7.27937	8.97536	10.3528	11.7308	12.5791	13.1091	13.6422	13.6422	15.0221	16.0998	17.2468	17.7832	18.6268	19.1643	20.0072
	101.671	101.671	102.176	103.233	104.637	105.891	107.299	108.706	109.481	110.259	110.887	111.665	112.929	113.701	113.701	113.701	114.018	113.851	113.851	0	0	0.50528	1.56171	2.96643	4.22041	5.62761	7.03499	7.80955	8.58775	9.21629	9.99364	11.2581	12.0303	12.0303	12.0303	12.3465	12.1797	12.1797
	124.908	124.908	125.3	127.059	128.891	130.25	131.609	133.843	135.118	136.473	138.311	139.589	140.471	141.421	141.824	142.239	142.706	143.178	143.178	0	0	0.39167	2.15107	3.98346	5.34179	6.7013	8.93522	10.2105	11.5655	13.4033	14.6807	15.5627	16.5134	16.9159	17.3313	17.798	18.2702	18.2702
	310.04	309.821	310.413	310.628	310.628	311.219	310.628	310.628	310.628	310.628	311.219	311.219	311.219	311.219	311.219	311.219	311.437	311.219	311.662	0	-0.2194	0.37231	0.58808	0.58808	1.17825	0.58808	0.58808	0.58808	0.58808	1.17825	1.17825	1.17825	1.17825	1.17825	1.17825	1.39667	1.17825	1.62136
																			3592 5µM NAA	0	9.59348	23.4506	59.5146	89.174	120.186	150.256	185.456	214.357	243.454	262.675	279.461	295.334	310.414	319.544	333.685	340.011	346.833	354.953
																				0	2.05975	4.49244	6.53144	8.90769	11.8538	13.691	16.7471	17.696	19.6666	20.2177	21.0908	20.1286	21.9462	22.0052	24.1822	24.4038	25.3621	27.7085
																				0	7.70182	14.9004	24.7226	35.8336	46.4879	58.7965	72.7941	80.8006	91.1851	93.7946	99.2301	100.719	107.739	109.886	117.437	118.267	122.748	127.455
																				12	12	12	12	12	12	12	12	12	12	12	12	12	12	12	12	12	12	12
																		elongation (NAA-ctl)	3592 5µM NAA	0	7.63334	18.112	50.9458	80.689	108.118	134.959	170.73	202.985	227.631	245.908	262.891	273.608	287.578	287.117	303.91	307.143	315.188	321.937
																			Standard Error of the Difference Between the Means	0	2.40687	6.32664	7.6843	10.8255	13.6993	17.1971	21.3634	23.5995	26.4639	27.3058	28.8861	29.4486	31.4276	31.9323	34.2361	34.409	35.6897	37.0117
3593 Control
	197.699	197.041	196.84	197.122	196.451	196.163	196.163	195.494	195.88	195.88	196.163	196.163	196.163	196.451	196.451	196.451	196.451	196.84	196.84	0	-0.65867	-0.85923	-0.57748	-1.24826	-1.53607	-1.53607	-2.20502	-1.8192	-1.8192	-1.53607	-1.53607	-1.53607	-1.24826	-1.24826	-1.24826	-1.24826	-0.85923	-0.85923
	140.73	141.06	140.73	140.407	141.152	140.73	140.73	140.456	141.152	141.397	141.397	141.354	141.354	141.397	141.397	141.354	141.397	141.397	141.397	0	0.33003	0	-0.32369	0.42216	0	0	-0.27384	0.42216	0.66637	0.66637	0.62393	0.62393	0.66637	0.66637	0.62393	0.66637	0.66637	0.66637
	158.902	158.382	158.619	158.685	159.126	158.619	158.902	158.902	159.59	160.1	160.078	159.831	160.328	160.1	160.328	160.328	160.328	160.078	160.562	0	-0.52004	-0.28345	-0.21727	0.22325	-0.28345	0	0	0.68761	1.19748	1.17562	0.92867	1.4253	1.19748	1.4253	1.4253	1.4253	1.17562	1.65902
	226.883	226.883	226.797	226.883	227.794	227.794	227.879	227.068	228.79	228.79	228.79	228.79	228.79	228.79	228.709	228.965	229.787	228.965	229.787	0	0	-0.08596	0	0.91054	0.91054	0.99612	0.18504	1.90707	1.90707	1.90707	1.90707	1.90707	1.90707	1.82619	2.08183	2.90363	2.08183	2.90363
	103.581	103.581	104.547	104.293	104.048	103.846	104.293	104.547	104.547	104.293	104.293	104.293	104.293	104.293	104.293	104.293	104.293	104.293	104.293	0	0	0.96575	0.71197	0.46718	0.26515	0.71197	0.96575	0.96575	0.71197	0.71197	0.71197	0.71197	0.71197	0.71197	0.71197	0.71197	0.71197	0.71197
	162.585	163.527	163.811	163.527	163.811	164.137	164.137	163.866	163.866	164.137	164.806	164.806	164.806	164.806	164.806	164.806	164.806	165.148	165.412	0	0.9414	1.22551	0.9414	1.22551	1.55178	1.55178	1.28044	1.28044	1.55178	2.22059	2.22059	2.22059	2.22059	2.22059	2.22059	2.22059	2.56306	2.82625
	148.661	147.828	148.111	148.111	148.946	147.275	147.828	145.89	147.828	147.275	147.828	147.275	147.828	148.385	147.828	148.946	148.946	148.385	148.946	0	-0.83309	-0.54925	-0.54925	0.28561	-1.38544	-0.83309	-2.77032	-0.83309	-1.38544	-0.83309	-1.38544	-0.83309	-0.27605	-0.83309	0.28561	0.28561	-0.27605	0.28561
	140.929	141.598	141.598	141.598	141.598	141.598	141.598	141.598	141.598	141.598	142.271	142.271	142.271	142.271	142.271	142.271	142.271	142.271	142.271	0	0.66896	0.66896	0.66896	0.66896	0.66896	0.66896	0.66896	0.66896	0.66896	1.34181	1.34181	1.34181	1.34181	1.34181	1.34181	1.34181	1.34181	1.34181
	119.808	120.603	121.037	120.603	120.603	121.211	121.211	121.211	121.211	121.211	121.211	121.211	121.211	121.211	121.211	121.211	121.211	121.211	121.211	0	0.79447	1.229	0.79447	0.79447	1.40238	1.40238	1.40238	1.40238	1.40238	1.40238	1.40238	1.40238	1.40238	1.40238	1.40238	1.40238	1.40238	1.40238
	125.256	125.32	125.256	124.652	125.256	125.256	125.256	125.32	125.992	125.32	125.32	125.992	125.32	125.32	125.992	125.992	126.669	126.732	126.063	0	0.06385	0	-0.60423	0	0	0	0.06385	0.73632	0.06385	0.06385	0.73632	0.06385	0.06385	0.73632	0.73632	1.41312	1.47626	0.80774
	101.592	101.39	101.39	101.02	101.39	101.39	101.39	101.39	101.39	101.39	101.39	101.242	101.242	101.242	101.39	101.242	101.242	101.242	101.242	0	-0.20199	-0.20199	-0.57252	-0.20199	-0.20199	-0.20199	-0.20199	-0.20199	-0.20199	-0.20199	-0.35004	-0.35004	-0.35004	-0.20199	-0.35004	-0.35004	-0.35004	-0.35004
	102.616	102.201	102.616	102.201	102.616	102.801	102.616	102.416	103.233	103.078	102.416	102.801	102.801	103.005	102.801	103.6	103.6	103.407	103.6	0	-0.41501	0	-0.41501	0	0.18499	0	-0.19997	0.61696	0.46185	-0.19997	0.18499	0.18499	0.38906	0.18499	0.9844	0.9844	0.79117	0.9844
	120.017	120.42	119.883	119.62	120.017	119.921	119.921	120.341	120.42	120.83	120.42	120.42	120.83	120.83	120.83	120.83	120.83	120.83	120.83	0	0.40343	-0.13339	-0.39644	0	-0.09586	-0.09586	0.32451	0.40343	0.81379	0.40343	0.40343	0.81379	0.81379	0.81379	0.81379	0.81379	0.81379	0.81379
																			3593 Control	0	0.933515	3.21725	-0.877749	5.77594	2.41136	4.33786	-1.23778	10.1548	9.83252	11.596	11.7062	12.9873	14.3934	14.7293	17.9585	20.4676	18.7878	21.4821
																				0	3.31517	3.89352	3.49734	3.62223	5.35811	5.04975	7.14551	5.72496	6.38342	6.35622	6.61973	6.39623	5.69257	5.93191	5.50126	6.19121	5.66288	6.27836
																				0	11.953	14.0383	12.6098	13.0601	19.3189	18.2071	25.7635	20.6416	23.0157	22.9177	23.8678	23.0619	20.5249	21.3878	19.8351	22.3227	20.4178	22.637
																				13	13	13	13	13	13	13	13	13	13	13	13	13	13	13	13	13	13	13
3593 5µM NAA
	321.279	322.025	322.444	323.246	324.23	325.357	326.735	329.509	331.658	332.826	334.073	334.426	335.774	336.757	337.74	339.094	340.076	341.059	342.229	0	0.74614	1.16509	1.96734	2.95116	4.07803	5.45667	8.23003	10.3793	11.5471	12.7946	13.1477	14.495	15.4779	16.4608	17.8157	18.7978	19.7799	20.9508
	158.902	160.153	160.153	161.966	162.874	165.109	167.839	170.488	172.308	174.471	175.866	177.192	178.101	178.194	178.519	179.513	180.336	180.754	180.834	0	1.25056	1.25056	3.06356	3.97169	6.20656	8.93672	11.585	13.4054	15.5681	16.9639	18.2895	19.1986	19.2912	19.6164	20.6107	21.4333	21.8515	21.9317
	152.266	153.118	154.263	157.115	160.153	162.604	166.108	168.19	171.143	173.185	174.485	176.102	177.102	178.227	179.226	180.278	180.469	181.334	182.135	0	0.85139	1.99655	4.8484	7.88684	10.3376	13.8422	15.9242	18.877	20.9187	22.2188	23.836	24.8355	25.9612	26.9599	28.0113	28.2026	29.0677	29.8684
	287.237	288.467	288.905	289.871	290.837	292.062	293.736	294.959	296.184	296.892	297.674	298.376	299.341	299.868	300.307	301.272	301.533	302.498	303.463	0	1.2298	1.66799	2.63382	3.59988	4.8248	6.49944	7.72248	8.94722	9.6554	10.4375	11.1388	12.1041	12.6315	13.0697	14.0355	14.2959	15.2611	16.2265
	143.199	143.377	145.169	146.509	148.476	150.625	153.395	154.742	156.895	158.673	160.031	161.012	161.805	161.994	162.388	163.591	163.957	163.957	164.149	0	0.17797	1.96971	3.31023	5.27643	7.4262	10.1958	11.5426	13.6957	15.4735	16.8321	17.8133	18.6063	18.7947	19.1893	20.3918	20.7582	20.7582	20.9502
	165.17	165.94	167.869	170.329	172.8	175.96	178.844	182.003	183.134	184.889	185.162	185.852	185.852	186.035	185.852	186.55	186.29	186.55	186.124	0	0.77014	2.69939	5.15948	7.63085	10.7906	13.6739	16.8331	17.9642	19.7195	19.9925	20.6825	20.6825	20.8653	20.6825	21.3807	21.1205	21.3807	20.954
	149.723	150.586	150.586	152.315	153.681	156.416	158.647	160.879	163.478	165.846	168.44	169.806	170.672	171.172	172.54	173.773	173.908	174.642	174.642	0	0.86244	0.86244	2.59238	3.95841	6.69303	8.92433	11.1558	13.7548	16.1232	18.7168	20.0827	20.9491	21.4493	22.8168	24.0498	24.1849	24.9194	24.9194
	266.595	266.923	267.329	270.601	272.611	275.986	278.928	281.519	284.114	285.974	287.835	289.318	291.172	292.289	293.22	294.517	294.156	294.885	295.447	0	0.32801	0.73418	4.00598	6.01625	9.39031	12.3331	14.9239	17.5192	19.3786	21.2398	22.723	24.5766	25.694	26.6249	27.9214	27.5612	28.2895	28.8519
	124.459	124.952	125.603	126.752	128.725	130.698	133.66	136.781	139.442	140.577	142.864	143.851	144.392	144.838	145.825	146.813	146.973	146.973	147.139	0	0.49316	1.14372	2.2929	4.26568	6.2393	9.20119	12.322	14.9829	16.1185	18.4047	19.3918	19.933	20.379	21.3664	22.354	22.514	22.514	22.6806
	206.177	207.171	207.171	208.166	208.274	209.38	209.497	210.373	210.737	211.603	213.354	214.581	215.574	216.449	217.559	217.938	218.799	219.666	219.666	0	0.99432	0.99432	1.98869	2.09675	3.20293	3.31991	4.19637	4.55969	5.42629	7.17706	8.40388	9.39654	10.2715	11.3821	11.761	12.6219	13.4886	13.4886
	142.274	143.785	144.257	147.105	148.354	151.199	154.302	156.285	159.389	161.372	162.496	163.487	165.339	164.615	165.339	165.605	166.46	166.46	166.595	0	1.51018	1.98234	4.83102	6.07993	8.92416	12.0273	14.0106	17.1151	19.0979	20.2218	21.2126	23.0647	22.3403	23.0647	23.3306	24.1858	24.1858	24.3209
	143.031	143.892	143.126	144.402	145.774	146.986	147.597	149.375	151.45	153.183	154.052	155.416	156.668	156.78	158.028	158.518	159.389	159.512	160.751	0	0.86085	0.09435	1.37075	2.74233	3.95492	4.56596	6.3439	8.41819	10.1514	11.0205	12.3841	13.637	13.7486	14.997	15.4867	16.358	16.4803	17.7199
	168.372	169.009	171.187	172.467	175.548	177.882	179.622	183.044	184.621	186.815	187.003	190	191.207	192.608	195	196.207	196.4	197.003	198.404	0	0.63727	2.81542	4.09578	7.1761	9.51037	11.2502	14.6721	16.2496	18.4438	18.6311	21.6284	22.8351	24.2368	26.6284	27.8349	28.0285	28.6309	30.032
																			3593 5µM NAA	0	17.4417	31.5482	68.6457	103.639	149.109	195.754	243.355	286.35	321.769	349.496	375.682	397.793	408.91	427.988	447.73	455.999	466.656	476.893
																				0	2.18786	4.61678	7.2933	11.304	15.124	20.1975	22.8499	25.3721	27.4995	27.4337	28.7032	28.9765	29.2924	30.1232	31.0231	29.5903	29.4612	29.9096
																				0	7.88846	16.646	26.2964	40.757	54.5304	72.823	82.3865	91.4803	99.151	98.9136	103.491	104.476	105.615	108.611	111.855	106.689	106.224	107.841
																				13	13	13	13	13	13	13	13	13	13	13	13	13	13	13	13	13	13	13
																		elongation (NAA-ctl)	3593 5µM NAA	0	16.5082	28.3309	69.5234	97.8631	146.698	191.416	244.593	276.195	311.937	337.9	363.976	384.806	394.516	413.259	429.772	435.532	447.868	455.411
																			Standard Error of the Difference Between the Means	0	3.97204	6.03938	8.08848	11.8701	16.0451	20.8192	23.9411	26.0099	28.2307	28.1604	29.4566	29.6741	29.8404	30.7017	31.507	30.231	30.0005	30.5615
3594 Control
	303.238	303.2	303.422	302.478	304.322	303.477	303.422	303.477	304.421	304.37	304.322	304.278	304.322	304.322	304.421	303.477	303.371	304.322	304.322	0	-0.03793	0.18462	-0.75943	1.08467	0.23899	0.18462	0.23899	1.18323	1.13231	1.08467	1.0403	1.08467	1.08467	1.18323	0.23899	0.13353	1.08467	1.08467
	125.419	125.686	126.384	126.384	126.384	125.686	126.384	126.384	126.384	126.384	126.649	126.649	126.649	126.649	126.649	126.649	126.649	126.649	126.384	0	0.26682	0.96503	0.96503	0.96503	0.26682	0.96503	0.96503	0.96503	0.96503	1.22982	1.22982	1.22982	1.22982	1.22982	1.22982	1.22982	1.22982	0.96503
	178.059	177.91	178.059	178.899	178.899	178.899	178.899	178.899	178.899	178.899	178.899	179.047	179.747	179.889	179.747	179.747	179.747	179.747	179.747	0	-0.14889	0	0.84043	0.84043	0.84043	0.84043	0.84043	0.84043	0.84043	0.84043	0.9885	1.68806	1.82987	1.68806	1.68806	1.68806	1.68806	1.68806
	203.177	203.177	204.012	204.088	204.502	204.592	204.088	204.088	204.088	204.088	204.502	204.502	204.502	204.502	204.502	204.502	204.502	204.502	204.502	0	0	0.83499	0.91096	1.32457	1.41502	0.91096	0.91096	0.91096	0.91096	1.32457	1.32457	1.32457	1.32457	1.32457	1.32457	1.32457	1.32457	1.32457
	171.453	171.164	171.563	171.84	172.122	171.84	172.122	171.84	172.122	172.409	172.122	172.8	172.122	172.525	172.122	172.525	172.8	172.525	172.525	0	-0.28896	0.11078	0.38742	0.66943	0.38742	0.66943	0.38742	0.66943	0.95678	0.66943	1.34784	0.66943	1.07274	0.66943	1.07274	1.34784	1.07274	1.07274
	307.717	307.717	308.292	308.292	308.65	308.65	308.521	308.65	308.65	308.65	308.65	308.65	308.65	309.011	309.011	309.226	309.011	309.011	309.011	0	0	0.57467	0.57467	0.93289	0.93289	0.80326	0.93289	0.93289	0.93289	0.93289	0.93289	0.93289	1.29393	1.29393	1.50905	1.29393	1.29393	1.29393
	222.729	222.729	222.353	222.767	222.767	223.188	223.652	223.652	223.652	223.652	223.224	223.618	224.076	224.076	224.118	223.652	224.118	223.618	223.652	0	0	-0.37521	0.03816	0.03816	0.45973	0.92298	0.92298	0.92298	0.92298	0.49557	0.88945	1.34735	1.34735	1.38974	0.92298	1.38974	0.88945	0.92298
	210.839	211.473	211.376	211.152	212	211.473	211.684	212	212	212.53	212.85	212.53	212.85	212.53	212.85	212.85	212.85	212.85	212.85	0	0.6346	0.53764	0.3128	1.1612	0.6346	0.84493	1.1612	1.1612	1.6912	2.01091	1.6912	2.01091	1.6912	2.01091	2.01091	2.01091	2.01091	2.01091
	155.322	155.39	155.261	156.157	156.259	155.464	156.259	156.259	156.32	156.259	156.387	157.204	157.204	157.204	157.115	157.204	157.156	157.204	157.204	0	0.06758	-0.06118	0.83472	0.93715	0.14157	0.93715	0.93715	0.99793	0.93715	1.06509	1.88144	1.88144	1.88144	1.79236	1.88144	1.83372	1.88144	1.88144
	156.109	156.109	155.756	156.17	156.668	157.08	157.08	157.496	157.08	157.496	157.496	157.918	157.918	157.991	157.918	158.345	157.918	158.345	157.918	0	0	-0.35272	0.06084	0.5595	0.97066	0.97066	1.38709	0.97066	1.38709	1.38709	1.80876	1.80876	1.88157	1.80876	2.23562	1.80876	2.23562	1.80876
																			3594 Control	0	1.04398	5.11941	8.81719	18.0192	13.3099	17.038	18.3814	20.2242	22.5993	23.369	27.8019	29.5866	30.982	30.4605	29.875	29.7622	31.1387	29.7457
																				0	1.67152	3.13803	3.59007	2.42467	2.71389	1.58045	2.23792	0.985063	1.79904	2.84574	2.46818	2.94631	2.17225	2.62925	3.93727	3.50207	3.03368	2.72804
																				0	5.28581	9.92332	11.3528	7.66749	8.58208	4.99784	7.07692	3.11504	5.68908	8.99903	7.80507	9.31705	6.86926	8.31442	12.4507	11.0745	9.59335	8.62683
																				10	10	10	10	10	10	10	10	10	10	10	10	10	10	10	10	10	10	10
3594 5µM NAA
	233.154	233.848	235.136	237.008	239.008	240.875	243.082	244.935	245.862	247.164	248.091	248.697	249.231	249.618	250.402	250.799	251.199	251.716	252.517	0	0.69378	1.98167	3.85398	5.85391	7.72103	9.92783	11.7802	12.7073	14.0094	14.9363	15.5421	16.0764	16.4632	17.2472	17.6443	18.0447	18.5616	19.3629
	233.555	233.555	234.463	235.869	236.78	238.606	240.84	242.668	244.395	246.221	247.04	247.952	249.275	250.186	252.01	252.923	253.837	254.348	255.157	0	0	0.90809	2.31348	3.22536	5.05124	7.28507	9.11337	10.84	12.6663	13.4854	14.3965	15.7198	16.6308	18.4548	19.3678	20.2814	20.7931	21.6017
	218.552	218.552	219.939	222.441	224.116	226.338	229.105	231.327	233.257	235.194	236.863	237.966	238.523	239.633	240.185	240.468	241.019	241.853	242.405	0	0	1.38658	3.88895	5.56399	7.78619	10.5527	12.7746	14.7053	16.6415	18.3108	19.4143	19.9705	21.081	21.6333	21.9162	22.4666	23.3012	23.8526
	155.425	155.425	156.013	158.218	159.402	161.604	163.218	165	167.41	169.027	170.206	171.012	172.409	173.003	173.217	174.026	175.206	174.614	175.422	0	0	0.5876	2.79298	3.97679	6.17924	7.79243	9.57478	11.9845	13.6014	14.7805	15.5865	16.9842	17.5777	17.7914	18.6006	19.7804	19.1886	19.9971
	98.656	98.656	99.4636	99.6393	99.8248	101.272	102.421	102.772	105.38	105.906	106.888	108.06	109.041	109.836	110.476	111.004	111.198	111.629	111.987	0	0	0.80759	0.98338	1.16888	2.61594	3.76473	4.11562	6.72429	7.24965	8.23182	9.4042	10.3853	11.1803	11.8203	12.3485	12.5421	12.9729	13.3306
	156.208	157.003	156.818	158.221	160.86	161.818	163.404	165.239	166.817	168.404	169.623	171.026	171.479	171.817	172.261	172.261	172.43	172.261	173.046	0	0.79499	0.61018	2.01317	4.652	5.60961	7.19622	9.03103	10.6091	12.1961	13.4149	14.8181	15.2707	15.6086	16.0532	16.0532	16.2215	16.0532	16.8381
	96.8762	97.5141	97.6217	99.4082	100.975	102.956	105.076	106.921	108.78	110.549	111.544	112.446	112.752	112.752	113.442	113.442	113.635	113.864	113.864	0	0.63789	0.74551	2.53204	4.09903	6.08009	8.19995	10.0443	11.9034	13.6724	14.6675	15.5693	15.8757	15.8757	16.5654	16.5654	16.7592	16.9877	16.9877
	156.263	156.589	157.991	159.816	162.561	163.478	165.711	167.547	169.26	171.231	172.812	174.385	175.308	176.233	177.003	177.924	178.463	179.234	179.769	0	0.32603	1.72791	3.55292	6.29816	7.21523	9.44799	11.2844	12.9976	14.9682	16.5494	18.122	19.0457	19.9702	20.7402	21.6615	22.2003	22.9719	23.5067
	225.056	225.056	226.46	227.247	228.65	230.054	231.294	232.863	234.267	235.671	236.457	237.861	238.481	238.481	239.727	240.508	240.67	241.29	242.074	0	0	1.40416	2.19101	3.59484	4.99879	6.23863	7.80707	9.21139	10.6158	11.4016	12.8057	13.4251	13.4251	14.6714	15.4522	15.6144	16.2347	17.0188
	198.698	199.449	200.552	202.781	205.197	207.793	209.859	211.88	212.81	214.107	215.244	215.968	216.899	217.83	219.338	219.493	220.989	220.989	222.284	0	0.75098	1.85348	4.08241	6.49921	9.09491	11.1612	13.1814	14.1115	15.4092	16.5458	17.2693	18.2003	19.1319	20.6394	20.7943	22.2904	22.2904	23.5853
	201.02	201.658	201.658	202.714	204.12	205.526	207.087	209.275	211.303	213.335	214.895	216.148	216.926	217.8	218.653	219.112	220.676	220.676	222.081	0	0.63823	0.63823	1.69418	3.10016	4.50625	6.06704	8.25504	10.2832	12.3155	13.8754	15.1282	15.9064	16.7805	17.6328	18.0919	19.6563	19.6563	21.0612
	189.201	189.201	190.602	192.8	194.402	196.01	198.215	200.801	202.2	203.6	205	205.205	205.801	207.002	207.8	208.6	208.6	209.201	209.805	0	0	1.40073	3.59946	5.2007	6.80925	9.01358	11.6	12.9994	14.3991	15.799	16.0038	16.5999	17.8015	18.5994	19.3991	19.3991	19.9999	20.6037
																			3594 5µM NAA	0	6.77668	24.7857	59.0867	93.8972	129.942	170.475	209.13	245.316	278.244	303.386	324.662	341.242	355.47	373.678	384.343	397.327	403.951	419.358
																				0	2.15467	3.14151	6.10137	9.5009	10.6485	12.9399	15.3493	13.5506	15.0183	16.0658	15.5805	15.3951	16.5615	16.7507	16.9709	18.6176	19.0212	19.8827
																				0	7.46401	10.8825	21.1357	32.9121	36.8874	44.825	53.1714	46.9406	52.0249	55.6535	53.9724	53.3303	57.3706	58.0263	58.7889	64.4934	65.8913	68.8758
																				12	12	12	12	12	12	12	12	12	12	12	12	12	12	12	12	12	12	12
																		elongation (NAA-ctl)	3594 5µM NAA	0	5.7327	19.6663	50.2695	75.8779	116.632	153.437	190.748	225.092	255.645	280.017	296.86	311.655	324.488	343.217	354.468	367.565	372.812	389.613
																			Standard Error of the Difference Between the Means	0	2.72701	4.44031	7.07921	9.80541	10.9889	13.036	15.5116	13.5863	15.1257	16.3159	15.7748	15.6745	16.7033	16.9558	17.4216	18.9442	19.2616	20.069
3595 Control
	226.91	227.266	226.91	226.91	227.139	227.563	227.266	227.669	227.669	227.669	227.669	227.669	227.783	227.563	227.669	227.563	227.783	227.669	228.32	0	0.35669	0	0	0.22905	0.65351	0.35669	0.75895	0.75895	0.75895	0.75895	0.75895	0.87312	0.65351	0.75895	0.65351	0.87312	0.75895	1.41028
	203.924	204.083	203.416	203.745	203.924	204.287	203.924	204.6	204.658	204.658	204.941	205.292	205.154	205.292	205.292	205.456	205.456	205.456	206.155	0	0.15931	-0.50818	-0.17907	0	0.36255	0	0.6756	0.73424	0.73424	1.01745	1.36846	1.22959	1.36846	1.36846	1.53158	1.53158	1.53158	2.23127
	181.819	181.819	182.2	182.044	182.2	182.628	182.628	182.858	183.216	183.807	184.024	184.253	184.253	184.253	184.253	184.613	184.253	184.253	184.613	0	0	0.38185	0.22536	0.38185	0.80945	0.80945	1.03928	1.39713	1.98837	2.20586	2.43395	2.43395	2.43395	2.43395	2.79452	2.43395	2.43395	2.79452
	304.547	303.903	304.243	304.214	304.854	304.547	304.854	304.214	304.527	304.844	304.527	304.527	304.527	304.527	304.844	305.164	305.164	305.164	305.477	0	-0.64425	-0.30388	-0.33346	0.30686	0	0.30686	-0.33346	-0.0197	0.29702	-0.0197	-0.0197	-0.0197	-0.0197	0.29702	0.61669	0.61669	0.61669	0.92948
	137.354	138.235	137.83	137.83	138.654	137.768	137.83	137.768	137.83	138.235	138.708	139.119	139.119	138.708	138.654	139.119	138.654	138.654	138.654	0	0.88175	0.47604	0.47604	1.30069	0.41436	0.47604	0.41436	0.47604	0.88175	1.35477	1.76509	1.76509	1.35477	1.30069	1.76509	1.30069	1.30069	1.30069
	224.207	223.517	223.517	224.181	224.181	224.207	224.207	224.9	224.207	224.9	225.577	224.9	224.9	224.9	225.595	225.595	225.595	225.595	225.595	0	-0.69015	-0.69015	-0.02676	-0.02676	0	0	0.69249	0	0.69249	1.36955	0.69249	0.69249	0.69249	1.38728	1.38728	1.38728	1.38728	1.38728
	180.712	180.278	180.613	180.361	180.613	180.953	180.613	180.613	180.613	180.892	180.613	180.613	180.953	181.298	181.298	181.221	181.554	181.221	181.516	0	-0.43492	-0.09963	-0.35173	-0.09963	0.24055	-0.09963	-0.09963	-0.09963	0.17975	-0.09963	-0.09963	0.24055	0.58562	0.58562	0.50838	0.84192	0.50838	0.80336
	182.011	181.805	182.2	182.011	182.011	182.784	182.784	182.784	182.784	182.784	182.584	182.784	182.011	182.784	182.784	182.011	182.011	182.39	181.805	0	-0.20615	0.18945	0	0	0.77304	0.77304	0.77304	0.77304	0.77304	0.57324	0.77304	0	0.77304	0.77304	0	0	0.3787	-0.20615
	245.308	245.308	245.717	245.937	246.13	246.221	246.13	246.629	246.546	246.13	246.221	246.13	246.221	246.333	246.629	246.629	246.629	246.629	246.221	0	0	0.40935	0.62901	0.82208	0.91348	0.82208	1.32131	1.23817	0.82208	0.91348	0.82208	0.91348	1.02514	1.32131	1.32131	1.32131	1.32131	0.91348
	210.021	210.231	210.772	211.54	211.154	211.54	212.078	212.25	211.154	211.54	212.078	212.078	211.698	212.078	211.929	212.624	211.154	212.078	212.462	0	0.2094	0.75096	1.51816	1.13254	1.51816	2.05639	2.22842	1.13254	1.51816	2.05639	2.05639	1.67647	2.05639	1.9078	2.60265	1.13254	2.05639	2.44033
	192.627	192.627	193	193.494	193	193	193.383	193.383	193	193	193.494	193.871	193.494	193.871	193.494	193.494	193.494	193.494	193.494	0	0	0.37342	0.86761	0.37342	0.37342	0.75646	0.75646	0.37342	0.37342	0.86761	1.24451	0.86761	1.24451	0.86761	0.86761	0.86761	0.86761	0.86761
	185.154	184.773	184.773	185.154	185.699	185.54	185.699	185.699	186.462	186.078	186.325	186.253	186.078	185.93	186.253	186.078	185.699	186.078	186.078	0	-0.38116	-0.38116	0	0.54469	0.38576	0.54469	0.54469	1.3078	0.92395	1.17099	1.09853	0.92395	0.7761	1.09853	0.92395	0.54469	0.92395	0.92395
																			3595 Control	0	-1.322	1.05493	4.98327	8.75734	11.367	11.9981	15.472	14.2381	17.5387	21.4647	22.7439	20.4551	22.8323	24.8713	26.4099	22.6684	24.8452	27.8626
																				0	2.72977	2.75214	3.36352	2.81542	2.61042	3.50938	3.9734	3.26322	3.07102	4.2708	4.65381	4.4736	4.09794	3.58892	5.11409	3.70872	3.81676	5.06152
																				0	9.45618	9.53369	11.6516	9.75291	9.04276	12.1569	13.7643	11.3041	10.6383	14.7945	16.1213	15.497	14.1957	12.4324	17.7157	12.8474	13.2217	17.5336
																				12	12	12	12	12	12	12	12	12	12	12	12	12	12	12	12	12	12	12
3595 5µM NAA
	283.671	283.341	283.341	283.656	289.033	291.568	295.677	297.254	299.162	299.817	301.705	303.923	303.645	304.923	307.143	308.423	309.705	310.395	310.987	0	-0.3298	-0.3298	-0.0141	5.36229	7.89759	12.0066	13.5835	15.4916	16.146	18.0346	20.2521	19.974	21.2524	23.4727	24.7528	26.0341	26.7243	27.3166
	237.118	237.002	238.516	241.661	245.359	247.736	250.122	252.834	254.026	256.195	257.614	260.1	261.633	263.245	264.775	265.962	266.391	267.918	268.689	0	-0.116	1.39814	4.54281	8.24081	10.6176	13.0039	15.7158	16.9075	19.0771	20.4959	22.9819	24.5152	26.127	27.6573	28.8443	29.2726	30.7998	31.5713
	209.48	210.297	211.691	215.058	218.9	221.452	225.639	227.035	229.02	230.417	232.034	233.658	235.417	236.224	237.622	238.43	239.24	239.827	240.416	0	0.8171	2.2105	5.57782	9.41921	11.9717	16.1588	17.5549	19.5393	20.9367	22.5542	24.1776	25.9363	26.7442	28.1412	28.95	29.7602	30.3467	30.936
	199.04	199.324	200.412	202.882	205.767	209.888	212.777	214.842	216.76	218.403	220.057	221.563	223.215	224.179	226.106	226.808	227.774	228.843	229	0	0.28366	1.37188	3.84154	6.72666	10.8479	13.7367	15.8016	17.72	19.3631	21.0166	22.5224	24.1749	25.1383	27.066	27.7681	28.7338	29.8025	29.9598
	167.287	167.287	167.72	170.426	173.54	175.354	178.899	181.177	184.719	186.507	189.19	190.118	191.471	193.238	194.551	195.474	196.359	197.687	198.134	0	0	0.43282	3.13876	6.25244	8.06675	11.6122	13.8895	17.4315	19.2202	21.9032	22.8312	24.1834	25.951	27.2636	28.1866	29.0722	30.3994	30.8466
	205.626	206.022	206.94	207.858	210.09	212.323	214.037	216.171	218.406	220.737	221.964	223.786	226.02	227.343	229.578	230.413	231.812	233.137	233.497	0	0.39597	1.31373	2.23225	4.46459	6.697	8.41151	10.5454	12.7797	15.1115	16.3381	18.1597	20.394	21.7175	23.952	24.7868	26.1866	27.5114	27.8715
	173.416	173.948	174.264	176.173	177.868	180.945	183.848	186.59	189.679	191.23	194.833	197.061	198.962	200.142	201.189	202.25	203.096	202.786	203.096	0	0.53258	0.84848	2.75752	4.45224	7.52905	10.4321	13.1748	16.263	17.8145	21.4176	23.6452	25.5466	26.7268	27.7733	28.8342	29.6803	29.3699	29.6803
	130.602	130.602	131.4	134.807	137.201	140	143.6	146.4	149.201	151.4	153.405	154.201	155	155.801	156.4	157.201	157.801	159.013	159.402	0	0	0.7977	4.20482	6.59813	9.39755	12.9977	15.7977	18.5988	20.7977	22.8022	23.5987	24.3975	25.1987	25.7977	26.5981	27.1981	28.4101	28.7996
	169.198	169.198	170.558	172.54	175.514	178.239	181.342	184.068	186.682	189.029	190.767	192.51	193.494	195.233	196.224	197.466	198.457	199.324	199.822	0	0	1.3598	3.34174	6.31542	9.04049	12.1441	14.8698	17.4834	19.831	21.5688	23.3116	24.2961	26.0351	27.0262	28.2683	29.2584	30.1257	30.6243
	176.011	176.233	177.8	181.207	184.621	188.218	191.024	194.201	197.608	199.612	200.801	201.814	203.806	204.402	205.602	206.816	207.002	207.408	207.8	0	0.22144	1.78909	5.1957	8.60987	12.2066	15.0122	18.1896	21.5968	23.6008	24.7895	25.8029	27.7949	28.3902	29.5902	30.805	30.9911	31.3965	31.789
	181.135	181.706	181.395	183.349	186.132	188.915	191.7	195.064	198.091	200.878	203.089	205.061	207.039	208.087	209.246	210.642	211.454	212.269	212.85	0	0.5705	0.25929	2.21408	4.99636	7.78001	10.565	13.9288	16.9556	19.7428	21.9533	23.9257	25.9033	26.9512	28.111	29.5066	30.3192	31.1334	31.7144
	141.989	142.302	143.892	145.465	148.96	151.162	153.688	156.541	159.063	161.276	162.865	164.438	165.082	166.337	166.973	168.867	169.189	169.815	170.792	0	0.31305	1.90288	3.47533	6.97029	9.17272	11.6986	14.5513	17.0734	19.2867	20.8755	22.449	23.0924	24.3476	24.9836	26.8774	27.1998	27.8252	28.8028
	205.913	205.913	206.94	209.308	212.462	216.002	218.625	221.777	224.154	226.55	228.405	230.083	231.387	233.077	234.719	235.847	236.772	237.508	238.623	0	0	1.027	3.39578	6.54916	10.0897	12.7126	15.8643	18.2414	20.6376	22.4927	24.17	25.4745	27.1646	28.8064	29.9348	30.8594	31.5953	32.7105
	281.832	281.832	282.554	284.738	287.647	290.558	293.234	294.681	297.594	299.775	302.218	303.424	304.91	306.575	307.833	309.492	310.234	311.67	312.93	0	0	0.72291	2.90697	5.81584	8.72657	11.4022	12.8497	15.7622	17.9434	20.387	21.5923	23.0783	24.7431	26.0012	27.66	28.4023	29.8382	31.0982
	192.315	192.354	194.124	196.359	198.595	201.259	203.531	205.73	207.538	209.774	211.092	211.983	213.359	214.674	215.574	216.456	217.35	218.248	219.146	0	0.03899	1.80882	4.04451	6.28022	8.94369	11.2165	13.4156	15.2231	17.4588	18.7775	19.6686	21.044	22.3593	23.2588	24.1407	25.0351	25.9327	26.8312
																			3595 5µM NAA	0	3.84879	23.8665	71.7628	136.953	196.123	258.389	310.067	362.751	404.944	445.074	478.492	507.726	534.595	562.894	586.9	603.96	622.598	635.779
																				0	1.65823	3.7576	7.40321	7.83566	8.83453	10.3158	10.5636	11.0917	11.3372	11.3682	10.7959	11.9144	11.3717	10.6708	10.7676	9.9531	9.55027	9.67499
																				0	6.42229	14.5531	28.6725	30.3474	34.216	39.9528	40.9126	42.9578	43.9089	44.029	41.8124	46.1441	44.0424	41.3277	41.7027	38.5482	36.988	37.4711
																				15	15	15	15	15	15	15	15	15	15	15	15	15	15	15	15	15	15	15
																		elongation (NAA-ctl)	3595 5µM NAA	0	5.17079	22.8115	66.7795	128.196	184.756	246.391	294.595	348.513	387.405	423.609	455.748	487.271	511.763	538.023	560.49	581.291	597.753	607.917
																			Standard Error of the Difference Between the Means	0	3.19395	4.65766	8.13148	8.32611	9.21213	10.8964	11.2862	11.5617	11.7458	12.144	11.7563	12.7266	12.0875	11.2581	11.9204	10.6216	10.2847	10.919
3596 Control
	231.579	232.349	230.705	231.355	232.349	231.465	231.465	232.349	232.349	232.349	232.243	231.465	231.465	231.579	232.349	232.243	231.579	232.349	232.349	0	0.76952	-0.87392	-0.22465	0.76952	-0.11446	-0.11446	0.76952	0.76952	0.76952	0.66405	-0.11446	-0.11446	0	0.76952	0.66405	0	0.76952	0.76952
	215.956	216.171	215.745	215.956	216.171	216.933	217.147	216.391	216.933	217.147	217.147	217.147	217.147	217.147	217.147	217.366	217.366	217.366	217.366	0	0.21522	-0.21079	0	0.21522	0.97716	1.19141	0.43484	0.97716	1.19141	1.19141	1.19141	1.19141	1.19141	1.19141	1.41004	1.41004	1.41004	1.41004
	224.589	224.321	223.815	224.589	224.321	225.089	225.089	225.222	225.089	223.815	224.589	223.958	224.45	224.45	224.589	225.089	223.182	224.45	225.089	0	-0.26731	-0.77385	0	-0.26731	0.50036	0.50036	0.6336	0.50036	-0.77385	0	-0.63092	-0.13807	-0.13807	0	0.50036	-1.40697	-0.13807	0.50036
	234.968	235.153	235.951	235.342	235.951	236.136	235.342	235.342	235.951	236.755	236.935	236.935	236.935	236.136	237.565	237.118	237.565	237.565	237.565	0	0.18506	0.98319	0.37422	0.98319	1.16747	0.37422	0.37422	0.98319	1.78707	1.96651	1.96651	1.96651	1.16747	2.59665	2.15003	2.59665	2.59665	2.59665
	220.601	220.601	221.4	221.4	221.4	222.002	221.813	222.002	222.002	221.4	222.002	221.4	222.002	222.002	222.002	222.002	221.813	222.002	221.813	0	0	0.79864	0.79864	0.79864	1.4008	1.21153	1.4008	1.4008	0.79864	1.4008	0.79864	1.4008	1.4008	1.4008	1.4008	1.21153	1.4008	1.21153
	139.27	139.718	139.714	139.946	139.718	139.946	140.186	140.186	140.186	140.186	140.186	140.186	140.431	140.186	140.431	140.431	140.431	140.464	140.688	0	0.44805	0.44447	0.6769	0.44805	0.6769	0.91607	0.91607	0.91607	0.91607	0.91607	0.91607	1.16196	0.91607	1.16196	1.16196	1.16196	1.194	1.41808
	183.221	184.133	183.175	184.133	184.174	183.273	184.174	184.133	184.133	184.22	185.173	185.132	185.173	185.132	185.132	185.132	184.22	184.22	185.173	0	0.91192	-0.0464	0.91192	0.95265	0.05184	0.95265	0.91192	0.91192	0.9988	1.95171	1.91121	1.95171	1.91121	1.91121	1.91121	0.9988	0.9988	1.95171
	227.969	227.969	227.969	227.969	227.969	228.064	227.969	228.876	228.876	228.965	228.876	228.79	228.876	228.79	228.876	228.965	229.059	228.965	228.965	0	0	0	0	0	0.09429	0	0.90621	0.90621	0.99576	0.90621	0.821	0.90621	0.821	0.90621	0.99576	1.08964	0.99576	0.99576
	156.263	156.952	156.952	156.869	157.204	156.605	156.605	157.204	156.605	157.204	157.204	157.204	157.204	157.204	157.204	157.204	157.204	157.204	157.204	0	0.68962	0.68962	0.60677	0.94109	0.342	0.342	0.94109	0.342	0.94109	0.94109	0.94109	0.94109	0.94109	0.94109	0.94109	0.94109	0.94109	0.94109
	120.54	120.54	121.511	121.754	122.25	120.785	119.817	122.25	121.754	122.25	122.25	122.25	121.754	122.483	121.754	122.483	122.723	123.223	122.483	0	0	0.97087	1.2134	1.70929	0.24448	-0.72392	1.70929	1.2134	1.70929	1.70929	1.70929	1.2134	1.9422	1.2134	1.9422	2.18282	2.68292	1.9422
	96.421	96.6282	97.3293	97.5141	98.1275	97.4166	97.4166	97.5141	97.5141	97.5141	97.5141	97.5141	98.2497	98.326	98.2497	98.4124	98.4124	98.4124	98.4124	0	0.2072	0.90839	1.09315	1.70652	0.99568	0.99568	1.09315	1.09315	1.09315	1.09315	1.09315	1.82873	1.90504	1.82873	1.99145	1.99145	1.99145	1.99145
	118.727	119.541	119.541	119.541	119.541	119.269	119.817	119.281	119.541	120.104	120.104	120.104	120.104	120.104	120.104	120.104	119.854	120.104	120.37	0	0.81421	0.81421	0.81421	0.81421	0.54202	1.08995	0.5546	0.81421	1.37754	1.37754	1.37754	1.37754	1.37754	1.37754	1.37754	1.1275	1.37754	1.64368
	128.191	128.25	127.393	128.191	128.25	128.316	128.191	128.316	128.316	128.316	128.316	128.316	128.316	128.316	128.316	128.316	128.39	128.39	128.39	0	0.0585	-0.79817	0	0.0585	0.12476	0	0.12476	0.12476	0.12476	0.12476	0.12476	0.12476	0.12476	0.12476	0.12476	0.19877	0.19877	0.19877
																			3596 Control	0	6.56491	4.73199	10.2	14.8648	11.4028	10.9668	17.5359	17.8333	19.4233	23.1899	19.7099	22.4881	22.0793	25.1123	26.9814	21.9861	26.7339	28.6089
																				0	2.21665	4.18723	2.83461	3.55366	2.79392	3.54191	2.50205	2.04289	3.87896	3.58335	4.52989	4.22081	4.14581	4.1016	3.66308	6.01894	4.78367	3.96313
																				0	7.99226	15.0973	10.2203	12.8129	10.0736	12.7705	9.02127	7.36574	13.9858	12.9199	16.3327	15.2184	14.9479	14.7885	13.2074	21.7016	17.2478	14.2893
																				13	13	13	13	13	13	13	13	13	13	13	13	13	13	13	13	13	13	13
3596 5µM NAA
	232.94	233.071	233.206	234.196	236.044	238.768	241.002	245.367	248.477	251.734	253.712	255.838	256.827	258.805	259.794	260.931	262.071	263.213	262.383	0	0.13089	0.26601	1.25659	3.10458	5.82776	8.06216	12.4272	15.5375	18.7941	20.7725	22.8979	23.8869	25.865	26.8542	27.9911	29.1307	30.2729	29.4434
	201.993	202.892	203.796	204.707	206.62	208.614	210.77	212.85	214.597	216.749	217.83	219.738	221.815	223.647	224.644	225.641	226.638	226.797	227.563	0	0.89903	1.8039	2.71454	4.62785	6.62191	8.77745	10.8571	12.6047	14.7561	15.8376	17.7459	19.8227	21.6545	22.6516	23.6487	24.6459	24.8047	25.5706
	177.102	176.706	176.912	177.564	178.664	179.078	179.847	181.604	182.584	184.177	185.925	186.703	187.683	188.513	189.842	190.252	190.822	192.003	191.606	0	-0.3957	-0.18926	0.4624	1.56282	1.97653	2.74549	4.50229	5.48256	7.07488	8.82305	9.6013	10.5816	11.4109	12.7404	13.1508	13.7202	14.9009	14.5047
	151.832	151.832	152.801	153.052	155.242	156.732	158.398	159.48	159.891	161.818	162.361	163.6	164.56	165.52	166.208	167.443	167.443	168.962	168.68	0	0	0.96838	1.22014	3.40961	4.90012	6.56609	7.64827	8.05845	9.98566	10.5286	11.768	12.7279	13.6882	14.3756	15.6104	15.6104	17.1294	16.848
	275.138	275.138	276.101	278.993	281.455	283.651	286.714	289.43	292.323	293.552	294.783	295.747	296.71	297.674	297.941	299.341	299.793	300.307	300.307	0	0	0.96328	3.85468	6.317	8.51304	11.576	14.2923	17.1853	18.4142	19.6448	20.6084	21.5722	22.5362	22.8031	24.2028	24.6551	25.1684	25.1684
	208.655	209.554	209.554	211.74	213.928	216.899	218.563	220.327	221.721	222.948	224.179	225.329	226.808	228.035	228.843	229.532	230.228	230.766	231.193	0	0.89907	0.89907	3.08519	5.27234	8.24337	9.90827	11.6718	13.0653	14.2932	15.5233	16.6734	18.1531	19.3799	20.1875	20.8769	21.5729	22.1109	22.5373
	164.21	164.754	165.052	167.523	170.038	171.129	173.349	176.119	178.09	180.278	181.397	182.497	183.883	184.44	185.27	185.828	186.387	186.936	186.682	0	0.54413	0.84128	3.3129	5.828	6.91838	9.13913	11.9091	13.8796	16.0673	17.1871	18.2863	19.6729	20.2295	21.0598	21.6176	22.1765	22.7256	22.4713
	248.073	248.204	248.073	249.329	251.311	253.712	256.4	257.965	260.783	263.898	266.18	267.434	269.691	270.407	272.259	272.661	273.995	275.363	276.226	0	0.13098	0	1.25653	3.23799	5.63987	8.32751	9.89254	12.7109	15.8251	18.1078	19.3615	21.618	22.3345	24.1865	24.5884	25.922	27.2908	28.1538
	129.711	130.146	130.599	133.27	135.532	137.753	141.778	144.903	147.648	149.833	151.238	152.532	153	153.883	154.305	154.829	155.235	155.235	155.653	0	0.43485	0.8874	3.55918	5.82106	8.04218	12.0668	15.1922	17.937	20.122	21.527	22.8207	23.2888	24.1719	24.5937	25.1177	25.5241	25.5241	25.9422
	162.926	163.273	164.21	166.433	168.074	170.792	173.349	176.173	178.393	180.613	182.497	183.774	185.327	185.995	187.216	187.878	188.82	189.737	190.707	0	0.34642	1.28387	3.50681	5.14803	7.86591	10.423	13.2469	15.4665	17.6865	19.5702	20.848	22.4004	23.0683	24.2901	24.9513	25.8937	26.8103	27.7802
	248.896	249.84	250.769	253.3	256.144	257.437	260.256	262.488	264.379	265.949	267.217	267.868	269.141	270.085	270.379	271.974	272.595	272.905	272.919	0	0.94439	1.87326	4.40466	7.24893	8.54181	11.3601	13.5925	15.483	17.0537	18.3216	18.9719	20.2457	21.1896	21.4838	23.0787	23.6994	24.0092	24.0238
	269.981	270.512	270.732	272.465	275.078	277.253	279.428	281.837	283.782	285.727	286.7	287.673	289.111	290.083	291.055	291.529	293	292.5	293.234	0	0.531	0.75086	2.4832	5.09669	7.27111	9.44651	11.8554	13.8001	15.7457	16.7187	17.692	19.1292	20.1013	21.0735	21.5473	23.0185	22.5181	23.2522
	197.408	196.229	198.806	200.205	202.625	205.419	206.693	210.06	212.509	214.149	216.689	216.933	218.577	220.538	221.93	221.883	224.397	224.397	225.222	0	-1.17875	1.39823	2.79669	5.21706	8.01087	9.2848	12.6513	15.1006	16.7413	19.2805	19.525	21.169	23.1298	24.522	24.4746	26.9888	26.9888	27.8139
	219.365	220.327	220.88	223.215	225.282	227.2	229.401	231.603	233.805	235.722	237.924	238.6	239.971	241.085	242.33	243.68	244.364	244.92	245.601	0	0.96204	1.51507	3.85015	5.91706	7.83536	10.0364	12.2381	14.4405	16.3573	18.5594	19.2351	20.6058	21.7201	22.9654	24.3151	24.9995	25.5554	26.2363
	211.059	211.085	211.085	214.058	216.083	218.147	220.145	223.081	225.08	226.142	228.107	229.14	230.139	231.138	232.138	233.174	233.214	234.214	236.076	0	0.02606	0.02606	2.99917	5.02409	7.08751	9.08618	12.0215	14.0208	15.0823	17.0482	18.0805	19.0799	20.0793	21.0787	22.1145	22.1553	23.1543	25.017
	152.279	152.643	152.856	154.729	156.371	158.028	160.112	162.336	163.866	165.496	167.027	168.656	169.594	170.532	171.129	172.07	172.409	173.349	173.954	0	0.36403	0.57679	2.44944	4.092	5.74913	7.83311	10.0567	11.5865	13.2169	14.7476	16.3771	17.3143	18.2522	18.8493	19.7904	20.1301	21.07	21.6747
																			3596 5µM NAA	0	6.13627	18.3412	57.1662	101.766	144.257	191.345	243.49	286.225	327.047	360.095	384.298	411.782	434.99	454.706	472.382	489.271	502.753	511.225
																				0	2.9589	3.29656	5.96307	7.55293	9.05133	11.7218	13.7358	16.6402	17.2508	18.1463	18.4538	18.7219	19.4319	19.5305	19.5756	21.1175	20.241	21.1994
																				0	11.8356	13.1863	23.8523	30.2117	36.2053	46.887	54.9433	66.5606	69.0034	72.5853	73.8152	74.8877	77.7277	78.122	78.3022	84.47	80.9642	84.7976
																				16	16	16	16	16	16	16	16	16	16	16	16	16	16	16	16	16	16	16
																		elongation (NAA-ctl)	3596 5µM NAA	0	-0.428637	13.6092	46.9662	86.9007	132.854	180.379	225.954	268.392	307.623	336.905	364.588	389.294	412.91	429.594	445.401	467.285	476.019	482.616
																			Standard Error of the Difference Between the Means	0	3.69711	5.32919	6.60252	8.34717	9.47273	12.2452	13.9618	16.7651	17.6816	18.4967	19.0016	19.1918	19.8693	19.9565	19.9153	21.9585	20.7986	21.5667
3597 Control
	353.842	353.442	353.442	353.442	353.726	353.293	353.442	353.842	353.566	353.842	353.842	354.12	353.842	353.842	353.842	353.842	354.12	353.442	353.842	0	-0.40012	-0.40012	-0.40012	-0.11589	-0.54869	-0.40012	0	-0.27565	0	0	0.27827	0	0	0	0	0.27827	-0.40012	0
	355.494	356.366	356.366	355.494	355.494	356.27	356.753	355.879	356.753	356.366	356.753	356.753	356.753	356.753	357.146	356.753	357.239	356.856	357.239	0	0.87236	0.87236	0	0	0.77554	1.2594	0.38517	1.2594	0.87236	1.2594	1.2594	1.2594	1.2594	1.65161	1.2594	1.7454	1.36169	1.7454
	193.892	193.662	193.892	193.892	194.51	194.196	194.196	194.196	194.435	194.733	194.733	194.733	195.041	195.041	195.576	195.274	194.982	195.041	195.274	0	-0.22964	0	0	0.61792	0.30406	0.30406	0.30406	0.54336	0.84143	0.84143	0.84143	1.1493	1.1493	1.68435	1.38245	1.09033	1.1493	1.38245
	261.094	262.155	262.488	261.91	262.488	261.91	262.488	261.91	262.488	262.488	262.728	262.728	262.728	262.728	262.728	262.728	263.068	263.304	262.84	0	1.06068	1.39424	0.81644	1.39424	0.81644	1.39424	0.81644	1.39424	1.39424	1.63415	1.63415	1.63415	1.63415	1.63415	1.63415	1.97458	2.21016	1.74641
	227.247	227.247	228.327	228.327	228.954	228.954	229.584	229.107	229.107	229.107	229.107	229.107	229.107	228.954	229.584	228.954	229.107	229.107	229.107	0	0	1.07996	1.07996	1.70758	1.70758	2.33785	1.8604	1.8604	1.8604	1.8604	1.8604	1.8604	1.70758	2.33785	1.70758	1.8604	1.8604	1.8604
	242.786	243.074	243.074	243.074	243.584	243.483	243.584	243.988	243.705	244.1	244.902	244.499	244.499	244.499	244.624	245.018	245.22	245.22	245.308	0	0.28815	0.28815	0.28815	0.79775	0.69715	0.79775	1.20179	0.91883	1.31448	2.11611	1.71358	1.71358	1.71358	1.83829	2.23246	2.4344	2.4344	2.52206
	390.866	390.427	391.312	390.418	389.525	389.974	390.867	390.881	391.318	388.631	389.991	391.318	390.427	391.337	393.144	391.312	390.881	392.21	390.881	0	-0.43902	0.44619	-0.44798	-1.34036	-0.89135	0.00128	0.01535	0.45257	-2.23478	-0.87468	0.45257	-0.43902	0.47174	2.27803	0.44619	0.01535	1.34469	0.01535
	199.181	199.492	199.72	199.72	199.72	200.262	200.262	200.262	200.34	200.025	200.262	200.562	200.562	200.262	200.808	200.562	200.562	200.562	200.562	0	0.31103	0.53898	0.53898	0.53898	1.08151	1.08151	1.08151	1.15889	0.84418	1.08151	1.38089	1.38089	1.08151	1.62755	1.38089	1.38089	1.38089	1.38089
	263.775	262.665	263.775	263.775	264.07	264.055	264.32	264.07	264.07	264.07	264.613	265.158	265.158	265.158	264.613	265.158	265.158	265.158	265.708	0	-1.10933	0	0	0.29555	0.2804	0.54536	0.29555	0.29555	0.29555	0.8384	1.38392	1.38392	1.38392	0.8384	1.38392	1.38392	1.38392	1.93397
red ones are	201.375	201.638	201.375	201.943	202.2	201.943	202.514	202.2	202.467	202.514	202.766	202.467	202.467	202.514	202.272	202.514	202.766	202.766	202.766	0	0.26302	0	0.56779	0.82513	0.56779	1.13893	0.82513	1.09201	1.13893	1.3906	1.09201	1.09201	1.13893	0.89682	1.13893	1.3906	1.3906	1.3906
a hyp. that	64.8151	62.6259	61.4003	63.4114	64.8151	64.6607	64.2028	64.2028	64.2028	65.6049	61.8466	64.8151	65.6049	68.4105	65.6049	65.6049	68.6003	66.6108	64.2028
crossed over	277.2	277.218	276.552	277.218	276.552	276.552	276.552	276.552	277.218	277.2	277.218	277.915	277.189	277.894	277.189	276.523	276.523	276.523	277.189	0	0.01804	-0.64831	0.01804	-0.64831	-0.64831	-0.64831	-0.64831	0.01804	0	0.01804	0.71516	-0.01082	0.69357	-0.01082	-0.67723	-0.67723	-0.67723	-0.01082
another on	111.14	112.508	113.741	113.018	112.004	112.872	112.508	111.14	114.237	111.508	112.004	110.639	109.772	109.417	111.14	113.877	110.788	112.508	113.018
transfer	173.908	173.908	173.908	174.27	174.27	173.908	173.557	174.27	174.27	174.416	174.771	174.771	174.27	174.27	174.27	174.27	174.642	174.27	174.27	0	0	0	0.36189	0.36189	0	-0.35111	0.36189	0.36189	0.50815	0.86326	0.86326	0.36189	0.36189	0.36189	0.36189	0.73447	0.36189	0.36189
	260.517	260.86	260.634	260.86	260.517	261.094	261.335	261.094	261.094	261.094	261.094	261.335	261.094	261.335	261.673	262.256	261.91	262.256	262.256	0	0.34333	0.11705	0.34333	0	0.57706	0.81824	0.57706	0.57706	0.57706	0.57706	0.81824	0.57706	0.81824	1.15667	1.73881	1.3935	1.73881	1.73881
	205.066	205.066	205.066	205.066	205.066	205.08	205.066	205.066	205.08	205.08	205.08	205.08	205.08	205.779	205.769	205.08	205.08	205.105	205.08	0	0	0	0	0	0.01463	0	0	0.01463	0.01463	0.01463	0.01463	0.01463	0.71317	0.70345	0.01463	0.01463	0.03901	0.01463
	305.944	305.693	305.693	305.693	305.693	306.08	305.693	306.08	306.08	306.08	306.47	306.47	306.08	306.341	306.615	306.615	307.002	306.47	306.47	0	-0.25178	-0.25178	-0.25178	-0.25178	0.13561	-0.25178	0.13561	0.13561	0.13561	0.52579	0.52579	0.13561	0.39687	0.67095	0.67095	1.05719	0.52579	0.52579
																			3597 Control	0	1.02548	4.84959	4.11297	5.90225	6.87129	11.3274	10.1764	13.8385	10.6712	17.1395	20.932	17.0928	20.4948	24.9332	20.7081	22.686	22.7248	23.4355
																				0	2.89102	3.03375	2.37136	4.18135	3.75805	4.53255	3.32639	3.30038	5.16219	4.3807	2.99072	4.10105	2.89156	4.1381	4.40429	4.66084	5.01167	4.72257
																				0	11.1969	11.7497	9.18423	16.1943	14.5549	17.5545	12.883	12.7823	19.9931	16.9664	11.583	15.8833	11.199	16.0268	17.0577	18.0514	19.4101	18.2904
																				15	15	15	15	15	15	15	15	15	15	15	15	15	15	15	15	15	15	15
3597 5µM NAA
	213.841	213.588	213.712	215.956	218.358	221.775	224.018	226.736	228.254	230.098	232.08	233.345	234.923	236.044	236.315	237.036	237.169	238.027	238.027	0	-0.25267	-0.12864	2.11495	4.51645	7.9336	10.1768	12.8945	14.4132	16.2568	18.2387	19.5042	21.0823	22.2034	22.4744	23.1948	23.3277	24.1863	24.1863
	257.878	257.498	258.368	259.731	261.473	262.252	263.61	264.093	265.068	265.94	266.923	267.793	268.287	269.156	270.52	271.017	271.017	270.897	270.897	0	-0.38031	0.49007	1.85275	3.59487	4.37391	5.73168	6.21491	7.19004	8.06196	9.04533	9.91495	10.4093	11.2782	12.642	13.1387	13.1387	13.0188	13.0188
	237.945	238.537	239.821	243.329	246.84	250.587	251.873	253.748	254.686	255.971	257.503	258.443	259.48	260.665	261.605	262.545	263.15	263.826	264.428	0	0.59184	1.8754	5.38363	8.89466	12.6419	13.9276	15.8025	16.7407	18.0253	19.558	20.4981	21.5349	22.7192	23.6593	24.5999	25.2048	25.8803	26.4823
	290.739	290.396	291.337	291.678	292.618	293.9	294.768	296.044	298.263	299.541	302.367	303.31	303.31	304.587	304.253	305.197	305.197	305.529	306.14	0	-0.34243	0.59787	0.93919	1.87879	3.16093	4.029	5.30521	7.5246	8.80261	11.6286	12.5714	12.5714	13.8479	13.5145	14.4579	14.4579	14.7903	15.4018
	261.859	262.191	263.181	265.415	268.561	270.795	272.621	274.352	275.676	277.417	278.325	280.071	281.055	282.307	282.73	283.704	284.121	284.542	285.03	0	0.33203	1.32181	3.55603	6.70224	8.93639	10.7619	12.4932	13.8168	15.5579	16.4666	18.2127	19.1964	20.4478	20.8708	21.8453	22.2627	22.683	23.1711
	273.353	273.353	274.235	275.182	278.297	279.251	281.091	282.45	284.201	285.559	287.712	289.472	290.028	291.707	292.181	292.262	293.62	295.296	296.25	0	0	0.88205	1.82851	4.94335	5.89753	7.73748	9.09675	10.8474	12.2058	14.3584	16.1187	16.6743	18.3538	18.8282	18.9086	20.2672	21.9432	22.8966
	225.442	225.442	226.738	229.172	232.332	233.985	236.072	237.876	239.37	240.666	241.963	243.261	244.035	245.204	245.904	246.26	247.194	247.194	247.776	0	0	1.29594	3.73063	6.88987	8.54325	10.6302	12.4342	13.9282	15.224	16.521	17.8194	18.593	19.7622	20.4627	20.8182	21.7525	21.7525	22.3343
	315.203	315.763	315.97	316.538	317.926	319.324	320.657	321.492	323.234	324.637	325.613	326.377	327.024	327.782	328	328.758	328.544	328.758	328.758	0	0.55946	0.76683	1.33441	2.72298	4.12118	5.45403	6.28873	8.03055	9.43361	10.4102	11.174	11.8213	12.5788	12.7969	13.5552	13.3407	13.5552	13.5552
	309.658	309.588	309.898	311.565	314.167	315.154	316.304	317.128	318.277	319.263	320.25	321.076	321.4	322.386	322.552	323.051	324.197	323.538	323.883	0	-0.06923	0.2407	1.90773	4.50948	5.49626	6.64598	7.47006	8.61894	9.60554	10.5922	11.4186	11.7424	12.7287	12.8947	13.3934	14.5398	13.8806	14.225
	224.956	225.754	226.126	228.281	230.054	231.417	232.794	234.555	236.516	237.893	239.654	240.832	242.405	242.992	243.971	243.971	244.951	244.951	245.734	0	0.79874	1.17052	3.32498	5.09879	6.46182	7.83835	9.59935	11.5608	12.9373	14.6984	15.8763	17.4491	18.0362	19.0158	19.0158	19.9955	19.9955	20.7781
	157.051	157.201	158.218	161.821	165.424	168.217	169.838	171.467	172.861	174.256	175.317	176.709	177.282	177.53	178.101	178.676	178.922	179.254	179.254	0	0.14956	1.16725	4.76994	8.37275	11.1662	12.7872	14.4162	15.8103	17.2046	18.2659	19.6578	20.2313	20.4793	21.0501	21.6247	21.8708	22.2031	22.2031
	230.586	230.991	231.812	233.335	236.485	238.849	241.081	242.392	244.1	246.077	247.386	249.618	250.539	251.462	253.16	253.308	254.615	255.002	255.002	0	0.40513	1.22621	2.74831	5.89846	8.26311	10.4947	11.806	13.5142	15.491	16.8001	19.0315	19.9532	20.8755	22.5738	22.7219	24.0292	24.4158	24.4158
																			3597 5µM NAA	0	3.1611	19.237	59.0745	112.929	153.451	187.351	218.408	250.465	280.117	311.474	338.31	354.998	376.257	389.437	400.887	413.081	420.342	428.04
																				0	2.3743	3.34996	8.44013	13.009	17.5483	18.8053	21.2671	20.4877	21.5996	21.5233	23.0383	24.7824	24.8934	25.9469	25.8666	27.0324	28.8441	29.2791
																				0	8.22481	11.6046	29.2375	45.0644	60.7891	65.1435	73.6713	70.9714	74.8233	74.5587	79.8072	85.8486	86.2334	89.8827	89.6046	93.6429	99.919	101.426
																				12	12	12	12	12	12	12	12	12	12	12	12	12	12	12	12	12	12	12
																		elongation (NAA-ctl)	3597 5µM NAA	0	2.13562	14.3874	54.9615	107.027	146.58	176.024	208.231	236.626	269.446	294.334	317.378	337.906	355.762	364.504	380.179	390.395	397.618	404.604
																			Standard Error of the Difference Between the Means	0	3.74103	4.5195	8.76694	13.6644	17.9462	19.3438	21.5256	20.7518	22.2079	21.9645	23.2317	25.1194	25.0608	26.2748	26.2389	27.4312	29.2763	29.6576
3598 Control
	208.339	208.83	209.067	209.067	209.571	210.038	209.554	210.278	210.278	210.278	210.278	210.278	210.278	210.278	210.523	210.523	210.523	210.523	210.523	0	0.4914	0.7283	0.7283	1.23232	1.69942	1.21562	1.93972	1.93972	1.93972	1.93972	1.93972	1.93972	1.93972	2.18449	2.18449	2.18449	2.18449	2.18449
	197.124	197.205	197.307	197.254	198.204	197.365	198.252	198.252	199.203	199.161	198.252	199.251	198.305	198.363	198.305	199.203	199.251	199.251	198.426	0	0.08115	0.18254	0.12931	1.08011	0.24081	1.12803	1.12803	2.07908	2.03641	1.12803	2.12677	1.18099	1.23897	1.18099	2.07908	2.12677	2.12677	1.30198
	191.88	192.005	192.005	192.315	192.419	192.005	192.782	193.329	194.165	193.685	193.685	193.685	193.745	194.116	194.116	194.116	194.116	194.116	194.116	0	0.12504	0.12504	0.43468	0.53864	0.12504	0.90209	1.44857	2.28471	1.80514	1.80514	1.80514	1.86451	2.23577	2.23577	2.23577	2.23577	2.23577	2.23577
	152.118	152.611	152.971	152.971	152.118	153.026	152.542	153.026	153.447	153.447	153.447	153.026	153.473	153.026	153.026	153.026	153.026	153.418	153.447	0	0.49225	0.85222	0.85222	0	0.90777	0.42343	0.90777	1.32869	1.32869	1.32869	0.90777	1.35475	0.90777	0.90777	0.90777	0.90777	1.29936	1.32869
	153.883	154.353	154.768	154.829	155.235	155.708	155.261	155.708	155.708	155.708	156.119	156.186	156.119	156.186	156.589	156.186	156.589	156.589	156.589	0	0.47042	0.8845	0.94587	1.35224	1.82499	1.378	1.82499	1.82499	1.82499	2.23547	2.30272	2.23547	2.30272	2.70556	2.30272	2.70556	2.70556	2.70556
	145.344	145.097	146	145.344	145.836	145.911	146.414	146.455	146.659	146	147.187	147.187	147.187	147.187	147.187	147.187	147.187	147.248	147.248	0	-0.2479	0.65558	0	0.4911	0.56651	1.06938	1.11035	1.31505	0.65558	1.84254	1.84254	1.84254	1.84254	1.84254	1.84254	1.84254	1.90367	1.90367
	208.753	208.753	209.497	211.483	212.132	212.424	212.984	213.712	214.704	214.704	214.965	215.697	215.39	215.455	215.956	215.574	216.566	216.566	216.816	0	0	0.74358	2.72942	3.37859	3.67066	4.23013	4.95898	5.95101	5.95101	6.21167	6.94311	6.6369	6.70189	7.20257	6.82021	7.81295	7.81295	8.06215
	166.643	166.208	166.643	167.171	166.904	166.904	167.61	166.904	167.171	167.869	167.869	168.077	168.576	168.324	168.576	168.576	168.834	168.576	168.834	0	-0.43563	0	0.52724	0.26083	0.26083	0.96634	0.26083	0.52724	1.22567	1.22567	1.43403	1.93306	1.68076	1.93306	1.93306	2.19091	1.93306	2.19091
	169.546	169.319	169.546	170.294	170.751	170.751	171.724	171.493	171.959	171.959	172.467	172.696	172.931	172.696	172.931	172.931	172.931	172.931	172.931	0	-0.22722	0	0.74741	1.20483	1.20483	2.17717	1.94699	2.41285	2.41285	2.92094	3.14982	3.38417	3.14982	3.38417	3.38417	3.38417	3.38417	3.38417
																			3598 Control	0	1.76274	9.81136	16.6851	22.4335	24.6965	31.7269	36.5154	46.2453	45.1087	48.5372	52.8029	52.6159	51.7406	55.4494	55.7149	59.7157	60.174	59.4957
																				0	2.45395	2.65986	5.60629	6.99803	7.95848	7.94064	9.3955	10.7825	10.746	11.0846	12.5328	11.829	12.1444	13.2015	11.9537	13.9992	13.7585	14.6136
																				0	7.36184	7.97958	16.8189	20.9941	23.8755	23.8219	28.1865	32.3476	32.2379	33.2539	37.5984	35.4871	36.4333	39.6044	35.861	41.9976	41.2754	43.8409
																				9	9	9	9	9	9	9	9	9	9	9	9	9	9	9	9	9	9	9
3598 5µM NAA
	183.221	183.221	183.175	184.329	186.218	187.216	188.521	191.262	192.44	194.312	195.433	196.431	198.305	197.428	197.57	198.426	199.361	199.424	199.492	0	0	-0.0464	1.10733	2.99643	3.99527	5.29938	8.04042	9.21842	11.0904	12.2117	13.2095	15.0841	14.2073	14.3491	15.2051	16.1403	16.203	16.2707
	221.759	221.434	223.134	223.573	225.258	226.738	228.265	229.985	232.573	233.94	236.677	237.539	239.14	240.01	241.373	243.019	243.019	244.377	244.297	0	-0.32492	1.37561	1.81437	3.49875	4.97885	6.50632	8.2259	10.8137	12.1813	14.9181	15.7806	17.3812	18.2515	19.6143	21.2596	21.2596	22.6179	22.5381
	317.63	317.569	317.695	318.567	319.565	320.564			323.558	326.443	326.497	328.39	329.389	330.388	332.295	331.436	333.338	333.338	333.384	0	-0.0614	0.06453	0.93681	1.93504	2.93328			5.92805	8.81266	8.86626	10.7597	11.7585	12.7574	14.6648	13.806	15.7074	15.7074	15.7539
	203.039	202.2	203.089	203.121	204.157	205.156	207.155	208.291	209.344	212.339	213.46	214.525	216.453	217.451	218.586	219.513	220.327	220.511	221.382	0	-0.83901	0.04924	0.08124	1.11739	2.11663	4.11512	5.25125	6.3048	9.29994	10.4202	11.4856	13.4138	14.4117	15.547	16.4737	17.2876	17.4714	18.3426
	225.488	225.788	226.877	227.438	228.002	228.569	229.393	230.482	232.174	232.998	233.823	235.213	236.603	237.171	237.994	238.254	239.91	240.47	241.299	0	0.29915	1.38826	1.94954	2.51383	3.0811	3.90432	4.99374	6.68614	7.50949	8.33422	9.72431	11.1147	11.6825	12.5053	12.7657	14.422	14.982	15.8102
	181.339	181.339	182.214	182.455	183.448	185.084	185.311	188.066	189.526	189.953	191.943	192.938	193.933	194.743	196.128	196.919	197.122	197.122	198.116	0	0	0.8747	1.11601	2.10808	3.7443	3.97109	6.72702	8.18626	8.61317	10.6032	11.5984	12.5935	13.404	14.788	15.5793	15.7823	15.7823	16.7767
	141.241	142.411	142.636	143.22	143.809	145.427	147.054	148.809	150.659	152.411	154.616	155.657	157.293	158.114	159.261	159.762	160.312	161.152	161.152	0	1.17045	1.39497	1.97918	2.56797	4.18603	5.81348	7.56767	9.41762	11.1697	13.3747	14.4157	16.0518	16.873	18.0199	18.5214	19.0713	19.9112	19.9112
	264.62	264.94	265.759	265.859	268.881	269.462			276.016	278.403	279.256	281.448	282.363	283.641	286.81	288.028	288.3	290.043	289.254	0	0.31914	1.13881	1.23851	4.26053	4.84195			11.3958	13.7821	14.6357	16.8276	17.7428	19.0201	22.1896	23.4073	23.6797	25.4226	24.6337
	164.438	166.027	166.208	166.76	168.003	168.68	170.602	171.563	173.081	174.324	175.864	177.2	178.732	179.402	180.278	181.232	182.85	183.142	183.439	0	1.58867	1.76926	2.32187	3.56454	4.24173	6.16344	7.12496	8.64247	9.88597	11.4251	12.762	14.2932	14.9633	15.8391	16.7935	18.4112	18.7036	19.0009
	121.017	120.416	121.396	122.577	124.535	127.098	128.456	130.614	132.575	134.172	135.518	136.894	137.873	139.635	140.464	140.617	140.812	141.411	142.394	0	-0.60058	0.37952	1.55998	3.51861	6.08186	7.43969	9.5974	11.558	13.155	14.501	15.8776	16.8566	18.6187	19.447	19.6	19.7954	20.3942	21.3773
																			3598 5µM NAA	0	3.28401	17.7557	29.8552	59.4385	85.0921	114.334	152.21	186.587	223.308	252.498	280.333	309.648	326.368	353.407	367.054	384.295	396.231	403.046
																				0	4.99822	4.50334	4.36621	6.29254	7.62683	9.83003	11.5018	13.8076	13.8598	16.0329	16.1167	15.9003	17.446	20.0689	22.4006	19.2093	22.744	20.4803
																				0	15.8057	14.2408	13.8072	19.8987	24.1182	27.8035	32.532	43.6635	43.8284	50.7004	50.9655	50.2812	55.1691	63.4634	70.8369	60.745	71.9229	64.7645
																				10	10	10	10	10	10	8	8	10	10	10	10	10	10	10	10	10	10	10
																		elongation (NAA-ctl)	3598 5µM NAA	0	1.52127	7.9443	13.1701	37.005	60.3956	82.607	115.695	140.342	178.199	203.96	227.531	257.032	274.627	297.958	311.34	324.58	336.057	343.55
																			Standard Error of the Difference Between the Means	0	5.56813	5.23019	7.10593	9.41108	11.023	12.6366	14.8515	17.5189	17.5376	19.4916	20.4161	19.8178	21.2568	24.0216	25.3905	23.7692	26.5817	25.1595
Col-0 Control	Scanner problems
	205.156	204.157	204.157	204.157	204.157	204.198	204.157	204.157	204.157	204.157	204.157	204.157	204.157	204.157	204.157	205.156	205.119	205.119	206.087	0	-0.59924	-0.59924	-0.59924	-0.59924	-0.55761	-0.59924	-0.59924	-0.59924	-0.59924	-0.59924	-0.59924	-0.59924	-0.59924	-0.59924	0.4	0.36344	0.36344	1.33132
	146.185	145.602	145.399	145.602	146.185	146.328	146.328	146.185	146.7	146.537	146.895	146.895	147.122	146.895	147.122	147.472	147.472	147.472	147.628	0	-0.18261	-0.38536	-0.18261	0.4	0.54359	0.54359	0.4	0.91556	0.75187	1.10971	1.10971	1.33759	1.10971	1.33759	1.68722	1.68722	1.68722	1.8431
	181.218	180.236	180.427	180.236	181.033	180.427	181.033	181.218	181.218	181.408	181.408	181.218	181.218	181.218	181.218	181.408	181.408	181.408	181.408	0	-0.58214	-0.39083	-0.58214	0.21505	-0.39083	0.21505	0.4	0.4	0.59028	0.59028	0.4	0.4	0.4	0.4	0.59028	0.59028	0.59028	0.59028
	244.369	244.984	244.984	244.182	244.182	245.165	244	244.369	244.182	244.182	244.182	244.182	244.182	244.182	244.369	244.369	244.182	244.182	244.182	0	1.0151	1.0151	0.21374	0.21374	1.19668	0.03143	0.4	0.21374	0.21374	0.21374	0.21374	0.21374	0.21374	0.4	0.4	0.21374	0.21374	0.21374
	335.704	334.718	335.704	335.538	335.376	335.376	335.538	336.204	335.704	335.704	335.704	335.872	335.704	335.704	336.043	335.872	336.525	336.363	336.525	0	-0.58595	0.4	0.23463	0.07217	0.07217	0.23463	0.90007	0.4	0.4	0.4	0.56826	0.4	0.4	0.73941	0.56826	1.22115	1.05916	1.22115
	185.648	184.765	184.765	185.348	185.054	185	184.765	185.054	185.054	185.054	185.054	185.054	185.054	185.054	185.054	185.054	185.348	185.348	185.348	0	-0.4828	-0.4828	0.1008	-0.19347	-0.24752	-0.4828	-0.19347	-0.19347	-0.19347	-0.19347	-0.19347	-0.19347	-0.19347	-0.19347	-0.19347	0.1008	0.1008	0.1008
	123.167	123.309	123.309	123.309	123.309	123.167	123.665	123.822	123.822	123.822	123.822	123.822	124.169	124.169	124.169	124.169	124.342	124.531	124.169	0	0.54201	0.54201	0.54201	0.54201	0.4	0.89832	1.0559	1.0559	1.0559	1.0559	1.0559	1.40269	1.40269	1.40269	1.40269	1.57572	1.76457	1.40269
	211.341	211.287	211.287	211.287	211.287	211.287	211.287	211.287	211.341	211.287	211.341	211.4	211.287	211.4	211.4	211.341	211.341	211.4	211.341	0	0.34558	0.34558	0.34558	0.34558	0.34558	0.34558	0.34558	0.4	0.34558	0.4	0.45913	0.34558	0.45913	0.45913	0.4	0.4	0.45913	0.4
	235.172	234.258	234.258	234.307	235.172	235.172	235.172	235.172	235.257	235.213	235.257	235.213	235.257	235.257	235.257	235.257	235.213	235.257	235.257	0	-0.51388	-0.51388	-0.46479	0.4	0.4	0.4	0.4	0.48503	0.44039	0.48503	0.44039	0.48503	0.48503	0.48503	0.48503	0.44039	0.48503	0.48503
	122.004	122.56	122.56	122.56	122.385	121.852	122.004	122.004	121.852	122.004	122.385	122.004	122.004	122.385	122.385	122.772	122.385	122.385	122.772	0	0.95609	0.95609	0.95609	0.78054	0.24827	0.4	0.4	0.24827	0.4	0.78054	0.4	0.4	0.78054	0.78054	1.16805	0.78054	0.78054	1.16805
																			Col-0 (b) Control*	0	-0.185928	1.87678	1.19395	4.60667	4.2552	4.20489	7.42704	7.03959	7.20736	8.97994	8.15852	8.8729	9.43638	11.0314	14.6221	15.6068	15.8833	18.5339
																				0	4.42243	4.23135	3.42303	2.60429	3.42366	3.02791	3.16306	3.20712	3.11149	3.52893	3.42074	4.03856	3.88312	4.08922	3.75373	3.78893	3.89211	3.94418
																				0	13.9849	13.3807	10.8246	8.2355	10.8266	9.5751	10.0025	10.1418	9.8394	11.1595	10.8173	12.771	12.2795	12.9313	11.8703	11.9816	12.3079	12.4726
																				10	10	10	10	10	10	10	10	10	10	10	10	10	10	10	10	10	10	10
Col-0 5µM NAA	Scanner problems
	201.02	200.449	203.18	205.341	207.504	210.04	211.625	213.378	214.56	216.518	217.497	218.124	219.866	220.638	221.822	222.245	223.575	223.987	224.964	0	-0.17041	2.55982	4.72128	6.88432	9.42057	11.0048	12.7577	13.9401	15.898	16.8772	17.5039	19.246	20.0178	21.2021	21.6255	22.9556	23.3667	24.3445
	185.884	185.564	187.779	189.995	192.481	193.869	196.087	196.919	198.588	199.424	200.524	202.193	203.578	204.963	204.963	205.798	206.349	206.349	207.183	0	0.07964	2.29476	4.51037	6.9968	8.38414	10.6024	11.4344	13.1031	13.9398	15.0399	16.7086	18.0936	19.479	19.479	20.3141	20.8649	20.8649	21.6991
	256.127	255.227	256.86	257.123	258.027	258.118	259.114	259.114	260.019	261.015	261.926	262.84	262.922	264.004	264.004	264.004	264.004	264.004	264.093	0	-0.49957	1.13296	1.39562	2.30021	2.39127	3.38695	3.38695	4.29231	5.28841	6.19864	7.11334	7.19512	8.27687	8.27687	8.27687	8.27687	8.27687	8.36587
	219.317	219.659	221.054	223.786	226.365	228.254	229.085	230.489	232.312	233.634	235.053	236.373	237.192	238.103	239.426	239.927	240.337	240.84	241.754	0	0.74171	2.13717	4.86849	7.44763	9.33712	10.168	11.5715	13.3952	14.7172	16.1361	17.4555	18.2748	19.1858	20.5093	21.0099	21.4201	21.9231	22.8369
	249.724	249.802	251.575	252.642	254.637	257.381	257.701	259.625	260.622	261.62	262.618	263.549	265.424	265.611	266.543	267.541	268.365	268.539	269.364	0	0.47807	2.25119	3.31819	5.31315	8.05719	8.37753	10.3009	11.2985	12.2961	13.2937	14.225	16.1003	16.2868	17.2188	18.2168	19.0416	19.2148	20.0402
	130.648	130.553	131.643	134.629	136.719	138.611	139.607	140.698	142.688	143.892	144.779	145.88	146.874	146.874	146.874	147.868	147.98	147.868	149.753	0	0.30429	1.39508	4.38074	6.47031	8.36259	9.35821	10.4499	12.4401	13.6439	14.5308	15.6317	16.6257	16.6257	16.6257	17.6198	17.7313	17.6198	19.5047
	175.559	176.082	177.539	180.546	183.698	186.078	189.082	190.924	192.627	193.693	195.387	195.543	196.848	197.231	197.773	198.154	199.078	199.251	200.002	0	0.92326	2.37962	5.38728	8.53901	10.9188	13.9229	15.765	17.4675	18.5339	20.2277	20.3837	21.6885	22.0717	22.6135	22.9949	23.9188	24.092	24.8434
	175.385	176.028	176.377	177.629	179.354	181.728	183.709	185.559	187.417	188.799	189.789	190.78	192.629	192.899	193.889	194.031	194.743	194.879	195.87	0	1.04312	1.39215	2.64354	4.36911	6.74253	8.72372	10.5733	12.4314	13.8135	14.8041	15.7947	17.6439	17.9137	18.9038	19.0456	19.7581	19.8942	20.8846
	146.154	145.527	146.697	149.933	150.625	153.222	154.208	154.742	156.525	157.877	159.656	160.639	161.623	162.788	163.771	164.575	164.754	165.56	165.738	0	-0.2274	0.94294	4.17929	4.87133	7.46803	8.45362	8.98769	10.7707	12.1225	13.9018	14.8853	15.869	17.0342	18.0171	18.8212	19.0003	19.8056	19.9837
	241.466	241.466	244.401	246.343	249.201	250.128	251.161	253.126	255.125	256.125	257.124	259.124	260.094	260.123	261.123	262.093	264.047	264.068	265.047	0	0.4	3.33496	5.27691	8.13437	9.06162	10.095	12.0601	14.0591	15.0586	16.0581	18.0572	19.0279	19.0567	20.0562	21.0271	22.981	23.0018	23.9808
																			Col-0 (b) 5µM NAA*	0	6.5039	41.9537	86.1096	129.807	169.638	199.164	227.092	260.769	286.411	311.294	333.923	359.336	372.424	387.144	399.948	414.758	419.226	437.058
																				0	3.43069	4.99389	8.43967	12.8195	15.305	17.8641	21.1289	22.5148	22.9801	23.8479	23.5462	25.7052	24.8474	26.5183	27.3403	29.8223	30.3407	31.6553
																				0	10.8488	15.7921	26.6886	40.5388	48.3987	56.4913	66.8154	71.198	72.6694	75.4136	74.4596	81.2871	78.5744	83.8581	86.4575	94.3064	95.9458	100.103
																				10	10	10	10	10	10	10	10	10	10	10	10	10	10	10	10	10	10	10
																		elongation (NAA-ctl)	Col-0 (b) 5µM NAA*	0	6.68983	40.0769	84.9157	125.201	165.383	194.959	219.665	253.729	279.203	302.314	325.765	350.463	362.987	376.112	385.326	399.151	403.343	418.524
																			Standard Error of the Difference Between the Means	0	5.5971	6.54548	9.10742	13.0814	15.6833	18.1189	21.3643	22.7421	23.1898	24.1075	23.7934	26.0206	25.149	26.8317	27.5967	30.062	30.5894	31.9001
3600 Control	Scanner problems
	145.726	145.726	146.414	146.414	146.455	147.139	146.455	146.455	147.187	147.187	147.139	147.139	147.139	147.828	147.187	147.868	147.139	147.187	147.187	0	0.4	1.08803	1.08803	1.129	1.81362	1.129	1.129	1.86119	1.86119	1.81362	1.81362	1.81362	2.50183	1.86119	2.54241	1.81362	1.86119	1.86119
	215.244	215.037	215.037	215.244	215.244	215.604	215.407	215.407	215.244	215.244	215.407	215.407	215.604	215.604	215.244	215.407	215.407	215.604	215.407	0	0.19316	0.19316	0.4	0.4	0.75975	0.56254	0.56254	0.4	0.4	0.56254	0.56254	0.75975	0.75975	0.4	0.56254	0.56254	0.75975	0.56254
	165.52	165.52	165.801	165.52	165.801	165.801	165.801	165.801	165.801	165.801	165.801	165.801	165.801	166.087	165.801	166.087	166.087	166.087	166.087	0	0.4	0.6807	0.4	0.6807	0.6807	0.6807	0.6807	0.6807	0.6807	0.6807	0.6807	0.6807	0.96694	0.6807	0.96694	0.96694	0.96694	0.96694
	151.331	150.403	150.403	150.333	150.403	150.403	150.479	150.479	150.479	150.403	150.403	150.479	150.403	150.562	150.403	150.479	150.403	150.479	150.403	0	-0.52797	-0.52797	-0.5978	-0.52797	-0.52797	-0.45153	-0.45153	-0.45153	-0.52797	-0.52797	-0.45153	-0.52797	-0.36848	-0.52797	-0.45153	-0.52797	-0.45153	-0.52797
	92.0272	92.0489	92.3472	92.3472	92.3472	92.6553	92.3472	91.7061	92.72	92.3472	92.3472	92.3472	92.6553	92.6553	92.6553	92.6553	92.6553	92.6553	92.6553	0	0.42173	0.72	0.72	0.72	1.02811	0.72	0.07888	1.09284	0.72	0.72	0.72	1.02811	1.02811	1.02811	1.02811	1.02811	1.02811	1.02811
																			3600 Control*	0	3.75463	9.11826	8.50997	10.1673	15.8928	11.179	8.46493	15.1689	13.2669	13.7536	14.0772	15.8928	20.6932	14.5713	19.6785	16.2697	17.6295	16.4711
																				0	3.83518	5.89968	5.93303	5.87634	7.98566	5.56417	5.72846	8.08458	8.08811	7.85611	7.60195	7.98566	9.68283	8.27076	10.2111	8.09096	7.87526	8.22991
																				0	8.57573	13.1921	13.2667	13.1399	17.8565	12.4419	12.8092	18.0777	18.0856	17.5668	16.9985	17.8565	21.6515	18.494	22.8328	18.0919	17.6096	18.4026
																				5	5	5	5	5	5	5	5	5	5	5	5	5	5	5	5	5	5	5
3600 5µM NAA	Scanner problems
	130.92	131.867	132.503	135.359	138.827	142.941	146.751	149.616	151.822	153.075	155.939	157.191	158.808	160.056	161.307	162.262	162.262	162.926	163.218	0	1.34754	1.98301	4.83896	8.30741	12.4207	16.2317	19.0964	21.3024	22.5553	25.4193	26.6712	28.2882	29.5364	30.7873	31.7423	31.7423	32.4065	32.6978
	108.301	108.24	108.24	109.59	110.941	114.061	115.884	118.596	120.768	122.589	123.944	125.24	126.59	127.475	128.825	129.294	130.177	130.648	131.061	0	0.33996	0.33996	1.68964	3.04092	6.16088	7.98305	10.6954	12.8679	14.6882	16.043	17.3393	18.6894	19.575	20.9249	21.3937	22.2763	22.7479	23.1605
	140.688	140.918	141.891	144.586	146.986	149.402	152.801	155.955	158.398	160.801	162.985	164.201	165.17	166.643	167.356	168.576	169.047	169.8	171.231	0	0.63082	1.6032	4.29801	6.69879	9.11454	12.5129	15.6675	18.1106	20.5135	22.6971	23.9135	24.882	26.3557	27.0683	28.2888	28.7597	29.5123	30.9432
	132.774	132.91	133.544	134.826	137.768	139.946	143.534	146.986	149.164	151.98	154.932	156.975	158.382	159.79	161.075	161.839	163.248	163.248	163.893	0	0.5355	1.16976	2.45157	5.39368	7.57218	11.1597	14.6122	16.7901	19.606	22.558	24.6003	26.0082	27.4163	28.7003	29.4652	30.874	30.874	31.519
	138.798	137.557	137.928	139.671	141.905	144.475	148.034	151.327	154.768	157.471	159.706	160.751	162.247	163.71	163.719	164.201	166.58	167.344	167.943	0	-0.84115	-0.47089	1.27263	3.50649	6.0765	9.63537	12.9291	16.3692	19.0722	21.3076	22.353	23.8483	25.3117	25.3209	25.8027	28.1819	28.9456	29.545
	157.496	157.509	158.493	159.662	161.805	163.957	166.172	168.882	171.269	174.748	177.341	179.293	180.826	181.805	183.199	183.636	184.946	185.367	185.809	0	0.4127	1.39687	2.56611	4.70941	6.86128	9.07557	11.7856	14.1728	17.6524	20.2454	22.197	23.7299	24.7088	26.1033	26.5395	27.8499	28.2712	28.713
	151.251	151.753	152.742	154.042	157.166	161.941	165.061	169.012	171.304	174.428	175.756	177.387	178.709	180.51	181.665	182.016	183.636	183.636	183.807	0	0.90164	1.89016	3.19075	6.31407	11.0899	14.2091	18.1604	20.4524	23.5762	24.9041	26.5351	27.8578	29.6589	30.8131	31.165	32.7841	32.7841	32.9555
	109.636	110.114	110.354	112.539	116.417	121.511	125.399	128.55	131.469	133.154	135.093	136.795	138.004	138.975	139.216	139.946	140.186	141.662	141.891	0	0.87782	1.11822	3.30312	7.18159	12.2756	16.1636	19.3138	22.2329	23.9183	25.8568	27.5597	28.7679	29.7391	29.9799	30.7107	30.9498	32.4258	32.655
	175.283	175.208	176.819	179.402	181.893	185.723	189.737	193.879	198.295	201.762	204.619	206.184	207.446	208.71	209.688	210.609	211.559	212.191	212.514	0	0.32582	1.93649	4.51915	7.0102	10.8403	14.854	18.9962	23.4126	26.8796	29.7365	31.3017	32.5637	33.8277	34.8052	35.726	36.6759	37.3083	37.6309
																			3600 5µM NAA*	0	10.6554	25.7922	66.1575	122.679	193.82	262.996	332.214	389.727	443.234	490.991	523.218	551.828	578.86	598.554	613.443	635.221	647.408	658.095
																				0	4.25014	5.78019	8.83732	12.4625	18.194	22.0156	23.7627	25.8909	26.0496	27.5315	27.9557	27.7626	28.4806	28.1568	29.0078	28.0166	28.1606	27.5999
																				0	12.7504	17.3406	26.5119	37.3875	54.5821	66.0469	71.2881	77.6726	78.1488	82.5946	83.867	83.2879	85.4417	84.4705	87.0233	84.0497	84.4819	82.7996
																				9	9	9	9	9	9	9	9	9	9	9	9	9	9	9	9	9	9	9
																		elongation (NAA-ctl)	3600 5µM NAA*	0	6.90079	16.674	57.6475	112.511	177.928	251.817	323.75	374.558	429.967	477.237	509.141	535.935	558.167	583.983	593.764	618.951	629.778	641.624
																			Standard Error of the Difference Between the Means	0	5.72471	8.25934	10.6442	13.7784	19.8694	22.7079	24.4434	27.1237	27.2764	28.6305	28.9708	28.8883	30.0816	29.3464	30.7525	29.1615	29.2411	28.8008
3601 Control
	138.221	139.176	138.885	138.521	138.521	138.521	138.521	139.474	139.843	139.843	139.176	139.176	139.56	139.176	139.176	139.843	138.885	138.885	138.885	0	0.95531	0.664	0.29992	0.29992	0.29992	0.29992	1.25317	1.62193	1.62193	0.95531	0.95531	1.33918	0.95531	0.95531	1.62193	0.664	0.664	0.664
	125.284	125.284	125.284	125.419	125.686	125.419	125.575	125.284	125.686	125.575	125.284	125.284	125.284	125.284	125.284	125.284	125.284	125	125	0	0	0	0.13562	0.40244	0.13562	0.291	0	0.40244	0.291	0	0	0	0	0	0	0	-0.28368	-0.28368
	113.031	113.78	114.004	114.004	114.004	114.004	114.004	114.004	114.004	114.004	114.004	113.78	113.508	113.508	113.508	113.508	113.508	114.237	114.237	0	0.74952	0.97342	0.97342	0.97342	0.97342	0.97342	0.97342	0.97342	0.97342	0.97342	0.74952	0.47674	0.47674	0.47674	0.47674	0.47674	1.20563	1.20563
	98.2497	98.326	98.4124	98.326	98.326	98.326	98.4124	99.1817	99.2472	99.2472	99.2472	99.3227	99.3227	99.3227	99.3227	99.3227	99.3227	99.3227	99.3227	0	0.07631	0.16272	0.07631	0.07631	0.07631	0.16272	0.93197	0.99749	0.99749	0.99749	1.07303	1.07303	1.07303	1.07303	1.07303	1.07303	1.07303	1.07303
	119.269	119.34	119.269	119.34	119.34	119.419	119.419	119.419	119.419	119.419	119.419	119.419	119.507	119.419	119.507	120.204	120.204	120.204	120.15	0	0.07125	0	0.07125	0.07125	0.15083	0.15083	0.15083	0.15083	0.15083	0.15083	0.15083	0.23872	0.15083	0.23872	0.93539	0.93539	0.93539	0.88131
	75.1332	75.1332	75.1332	75.1332	75.1332	75.1332	75.1332	75.1332	75.1332	75.1332	75.1332	75.1332	75.3127	75.1332	75.1332	75.1332	75.9539	75.9539	75.1332	0	0	0	0	0	0	0	0	0	0	0	0	0.17946	0	0	0	0.82071	0.82071	0
	107.856	108.522	108.24	108.24	108.24	108.24	108.24	107.856	108.24	107.856	107.856	107.856	107.856	107.856	107.856	107.856	107.856	107.856	107.856	0	0.6655	0.38408	0.38408	0.38408	0.38408	0.38408	0	0.38408	0	0	0	0	0	0	0	0	0	0
	110.766	110.766	110.766	110.887	110.887	110.887	110.887	110.887	110.887	110.766	110.887	110.027	110.766	110.766	110.027	110.887	110.766	110.887	110.887	0	0	0	0.12181	0.12181	0.12181	0.12181	0.12181	0.12181	0	0.12181	-0.73825	0	0	-0.73825	0.12181	0	0.12181	0.12181
	139.058	139.058	139.058	139.058	139.058	139.058	139.058	139.27	139.27	139.27	139.27	139.27	139.058	139.27	139.27	139.27	139.27	139.27	139.27	0	0	0	0	0	0	0	0.21198	0.21198	0.21198	0.21198	0.21198	0	0.21198	0.21198	0.21198	0.21198	0.21198	0.21198
	75.5381	75.6637	75.6637	75.1332	75.6637	75.5381	75.5381	75.6637	75.6637	75.6637	75.6637	75.8024	75.8024	75.8024	75.8024	75.9539	75.9539	75.9539	75.9539	0	0.12566	0.12566	-0.40485	0.12566	0	0	0.12566	0.12566	0.12566	0.12566	0.2643	0.2643	0.2643	0.2643	0.41586	0.41586	0.41586	0.41586
																			3601 Control	0	5.59551	4.88925	3.5085	5.19618	4.53388	5.04567	7.97738	10.5614	9.25472	7.48559	5.64456	7.55953	6.6298	5.25321	10.2801	9.73182	10.932	9.08037
																				0	2.48966	2.28046	2.35945	1.97789	1.9806	1.95214	3.20578	3.52165	3.75316	2.91146	3.59571	3.19891	2.68461	3.45083	3.70548	2.70705	3.33937	3.38032
																				0	7.87301	7.21143	7.46123	6.25463	6.2632	6.17319	10.1376	11.1364	11.8685	9.20684	11.3706	10.1158	8.48948	10.9125	11.7178	8.56043	10.56	10.6895
																				10	10	10	10	10	10	10	10	10	10	10	10	10	10	10	10	10	10	10
3601 5µM NAA
	73.7564	73.8783	74.027	75.1665	76.0592	76.6942	78.6448	79.3977	80.0562	80.7217	80.8084	80.8084	81.3941	81.4678	81.5659	82.807	82.8794	82.8794	82.9759	0	0.12192	0.27066	1.41012	2.30283	2.93784	4.88841	5.64137	6.29987	6.96538	7.05206	7.05206	7.63774	7.71143	7.80956	9.05064	9.12307	9.12307	9.21954
	121.277	122.025	123	124.197	125.399	126.905	128.098	129.074	129.294	129.294	129.294	130.269	130.269	130.495	130.269	130.729	131.244	131.469	131.7	0	0.74805	1.72346	2.92088	4.12282	5.62894	6.82108	7.79708	8.0177	8.0177	8.0177	8.99241	8.99241	9.21867	8.99241	9.45219	9.96751	10.1921	10.4239
	110.68	110.368	110.68	111.629	112.272	112.579	113.217	113.842	114.791	115.109	115.434	116.056	116.379	117.004	117.644	117.953	118.903	118.903	119.854	0	-0.31215	0	0.94913	1.59227	1.89914	2.53689	3.16228	4.11139	4.42892	4.75424	5.3763	5.69897	6.32455	6.96381	7.27366	8.2236	8.2236	9.17436
	82.3286	81.8352	82.3286	83.7377	84.0238	84.2021	85.9128	86.6833	87.3213	87.4586	88.7299	88.8651	89.4986	89.4986	89.6437	90.2718	90.4268	90.9065	91.0494	0	-0.49341	0	1.40908	1.6952	1.87353	3.58414	4.35472	4.99264	5.12995	6.40132	6.53646	7.16999	7.16999	7.31513	7.9432	8.09816	8.57794	8.72083
	149.251	149.79	150.333	151.433	151.717	153.652	154.486	155.872	156.461	156.707	156.984	157.258	157.813	158.382	159.477	159.477	160.312	160.863	161.988	0	0.53838	1.08149	2.18168	2.46537	4.40073	5.23478	6.62027	7.20939	7.45526	7.73261	8.00628	8.56171	9.13098	10.2258	10.2258	11.0607	11.6118	12.7362
	74.3303	74.2428	75.2396	76.2365	76.4199	77.3175	79.1581	79.2275	79.3095	79.3095	79.404	80.2247	80.2247	80.3057	82.2192	82.2192	82.2982	83.1505	83.2166	0	-0.0875	0.90928	1.90613	2.08955	2.98719	4.82773	4.89718	4.97918	4.97918	5.07369	5.89434	5.89434	5.97533	7.88888	7.88888	7.9679	8.82013	8.88624
	123.223	123.454	124.197	124.427	125.172	125.399	126.147	127.122	128.098	128.098	129.074	129.074	128.86	129.074	129.294	129.838	130.05	130.269	130.817	0	0.23108	0.97405	1.20332	1.94851	2.17599	2.92337	3.89862	4.87425	4.87425	5.85025	5.85025	5.63702	5.85025	6.07087	6.61499	6.82662	7.04558	7.5933
	87.3213	88.7694	88.7694	90.2497	91.9239	92.4446	95.3363	95.6034	96.7729	96.8401	97.5295	97.7446	97.8008	98.27	98.7168	99.2018	99.7246	100.424	100.688	0	1.44811	1.44811	2.9284	4.60263	5.12333	8.015	8.2821	9.45168	9.51882	10.2082	10.4233	10.4796	10.9488	11.3955	11.8806	12.4034	13.1028	13.3664
	108.374	109.124	109.124	109.786	110.454	111.198	111.946	112.61	114.022	114.11	114.769	115.434	115.521	115.521	116.276	116.276	116.846	116.932	117.034	0	0.74943	0.74943	1.41181	2.07926	2.82367	3.57207	4.2356	5.64758	5.73525	6.39498	7.05961	7.14621	7.14621	7.90118	7.90118	8.4717	8.55725	8.65983
																			3601 5µM NAA	0	6.92364	16.831	38.3835	53.8537	70.2036	99.7267	114.98	130.725	134.302	144.604	153.32	158.087	163.398	175.362	183.988	193.187	200.506	208.799
																				0	4.29314	4.28944	5.1247	7.56556	9.87592	12.763	12.6098	12.2902	12.2299	11.8097	11.5854	11.6388	12.1647	11.7166	11.535	12.251	13.1783	13.7966
																				0	12.8794	12.8683	15.3741	22.6967	29.6278	38.2889	37.8295	36.8706	36.6897	35.4292	34.7562	34.9163	36.494	35.1498	34.605	36.7531	39.535	41.3898
																				9	9	9	9	9	9	9	9	9	9	9	9	9	9	9	9	9	9	9
																		elongation (NAA-ctl)	3601 5µM NAA	0	1.32813	11.9417	34.875	48.6576	65.6697	94.681	107.003	120.163	125.047	137.118	147.675	150.527	156.768	170.108	173.708	183.456	189.574	199.718
																			Standard Error of the Difference Between the Means	0	4.96281	4.85796	5.64177	7.81983	10.0726	12.9114	13.011	12.7848	12.7929	12.1633	12.1306	12.0704	12.4574	12.2142	12.1156	12.5465	13.5948	14.2047
3602 Control
	94.0851	94.0851	94.1329	94.1329	95.0842	95.0842	94.1329	94.0851	94.1329	94.1329	94.1329	94.1913	94.1329	94.1329	94.1329	94.1329	94.1329	94.1913	94.1329	0	0	0.04781	0.04781	0.9991	0.9991	0.04781	0	0.04781	0.04781	0.04781	0.10622	0.04781	0.04781	0.04781	0.04781	0.04781	0.10622	0.04781
	100.901	100.901	101.193	101.514	101.193	101.193	101.193	101.193	101.193	101.193	101.193	101.514	101.242	101.242	101.242	101.514	100.901	101.242	101.242	0	0	0.29195	0.61261	0.29195	0.29195	0.29195	0.29195	0.29195	0.29195	0.29195	0.61261	0.34134	0.34134	0.34134	0.61261	0	0.34134	0.34134
	96.1041	96.3172	96.3172	96.1041	96.3172	96.5401	96.5401	96.5401	97.2934	96.5401	96.5401	97.2934	97.2934	96.3172	96.3172	97.5141	96.5401	96.7729	97.5141	0	0.21307	0.21307	0	0.21307	0.43604	0.43604	0.43604	1.18926	0.43604	0.43604	1.18926	1.18926	0.21307	0.21307	1.40999	0.43604	0.66882	1.40999
	89.1852	89.5545	89.9444	89.9444	89.5545	89.9444	89.9444	89.5545	89.5545	89.6939	90.05	90.05	89.9444	89.9444	89.5545	89.9444	89.9444	89.5545	89.5545	0	0.36925	0.75923	0.75923	0.36925	0.75923	0.75923	0.36925	0.36925	0.50872	0.86479	0.86479	0.75923	0.75923	0.36925	0.75923	0.75923	0.36925	0.36925
	82.8553	83.2586	83.2586	83.2586	83.2586	82.7647	83.1925	83.1925	83.1925	83.1925	83.1925	82.7647	82.7647	82.8553	82.7647	82.7647	82.8553	82.8553	82.8553	0	0.40333	0.40333	0.40333	0.40333	-0.09057	0.33725	0.33725	0.33725	0.33725	0.33725	-0.09057	-0.09057	0	-0.09057	-0.09057	0	0	0
	153.584	153.883	153.883	153.883	154.042	154.042	153.883	153.883	154.574	154.574	154.574	154.574	154.574	154.574	154.208	154.208	154.208	154.208	154.208	0	0.29922	0.29922	0.29922	0.45835	0.45835	0.29922	0.29922	0.98976	0.98976	0.98976	0.98976	0.98976	0.98976	0.6238	0.6238	0.6238	0.6238	0.6238
	101.237	101.237	101.237	101.237	101.39	101.769	101.769	101.769	101.769	101.769	101.769	101.769	101.637	101.39	101.237	101.237	101.637	101.237	101.637	0	0	0	0	0.15299	0.53201	0.53201	0.53201	0.53201	0.53201	0.53201	0.53201	0.39927	0.15299	0	0	0.39927	0	0.39927
	77.6209	78.339	78.339	78.339	78.339	77.8845	78.339	78.339	78.339	78.339	78.1025	78.1025	78.5875	78.1025	77.8845	77.6209	77.8845	77.8845	77.6209	0	0.71814	0.71814	0.71814	0.71814	0.26366	0.71814	0.71814	0.71814	0.71814	0.48163	0.48163	0.96666	0.48163	0.26366	0	0.26366	0.26366	0
	164.469	164.137	164.757	164.757	164.469	164.806	164.757	164.757	165.082	165.082	165.412	165.705	165.412	165.412	165.747	166.355	166.027	166.027	166.027	0	-0.3317	0.28856	0.28856	0	0.33711	0.28856	0.28856	0.61296	0.61296	0.94277	1.23572	0.94277	0.94277	1.27795	1.8862	1.55827	1.55827	1.55827
																			3602 Control	0	3.93067	7.10567	7.35871	8.4812	9.37655	8.72586	7.69625	11.9671	10.5237	11.5805	13.9263	13.0423	9.23949	7.16447	12.345	9.61456	9.24598	11.1707
																				0	2.15936	1.84374	2.11288	2.13441	2.18657	1.597	1.38249	2.53066	1.89908	2.27084	3.23584	3.21693	2.67456	2.91915	4.88552	3.4907	3.42124	4.10899
																				0	6.47808	5.53121	6.33864	6.40323	6.55972	4.79099	4.14746	7.59199	5.69723	6.81252	9.70753	9.65079	8.02369	8.75746	14.6566	10.4721	10.2637	12.327
																				9	9	9	9	9	9	9	9	9	9	9	9	9	9	9	9	9	9	9
3602 5µM NAA
	134.164	134.347	134.974	136.945	137.117	138.101	139.086	139.086	139.904	139.904	140.73	140.73	139.904	140.73	140.73	140.577	141.421	141.566	141.566	0	0.18249	0.80999	2.78116	2.95266	3.93733	4.92222	4.92222	5.73946	5.73946	6.56616	6.56616	5.73946	6.56616	6.56616	6.4133	7.25728	7.40216	7.40216
	116.829	117.324	118.461	119.62	120.673	121.495	122.642	123.223	124.278	124.852	124.852	125.431	125.67	126.246	126.246	126.606	126.606	127.64	128.456	0	0.49541	1.63203	2.7913	3.84418	4.66593	5.81282	6.39444	7.44898	8.02298	8.02298	8.60233	8.84127	9.41686	9.41686	9.77676	9.77676	10.8112	11.6273
	118.983	119.281	120.104	121.758	123.146	125.096	126.194	127.581	128.705	128.969	129.53	129.53	129.53	129.53	130.096	130.92	131.488	130.92	130.92	0	0.29799	1.12093	2.77477	4.16306	6.11277	7.2111	8.59816	9.7219	9.9858	10.5467	10.5467	10.5467	10.5467	11.1129	11.9366	12.5045	11.9366	11.9366
	101.39	101.637	102.552	103.47	105.475	106.231	107.154	108.462	109.005	109.005	109.385	109.932	110.309	110.494	110.693	111.615	111.79	112.161	112.721	0	0.24628	1.1621	2.07947	4.08479	4.84055	5.76376	7.07164	7.61426	7.61426	7.99431	8.54147	8.91833	9.10401	9.30294	10.2251	10.3996	10.7703	11.3306
	98.1835	99.0202	99.0202	99.8599	100.703	101.548	102.083	103.175	104.01	103.465	104.01	104.561	104.561	104.561	104.848	104.848	105.688	105.688	106.231	0	0.8367	0.8367	1.6764	2.51903	3.36452	3.8998	4.99111	5.82611	5.28147	5.82611	6.37749	6.37749	6.37749	6.66401	6.66401	7.50472	7.50472	8.04738
	86.4928	87.4757	87.4757	88.2836	89.627	89.8221	91.7823	92.7631	93.7443	93.7443	94.541	94.7259	94.7259	94.7259	95.5249	96.6902	96.8814	97.6729	98.0612	0	0.98294	0.98294	1.79086	3.13423	3.32928	5.28958	6.27037	7.25156	7.25156	8.04823	8.23315	8.23315	8.23315	9.0321	10.1975	10.3886	11.1802	11.5684
	94.7048	94.3398	94.3398	94.921	95.2733	95.6347	96.933	97.4987	97.1442	97.8621	97.8621	98.0816	98.0816	98.4327	98.4327	99.1615	99.368	100.09	100.09	0	-0.36499	-0.36499	0.21622	0.56849	0.92992	2.22817	2.79392	2.43942	3.15735	3.15735	3.3768	3.3768	3.72792	3.72792	4.45668	4.6632	5.38516	5.38516
	117.154	118.152	119.067	120.104	121.103	122.201	124.101	126.063	126.099	127.098	127.098	127.098	127.098	128.098	128.098	128.098	129.097	129.139	130.096	0	0.99869	1.91346	2.95037	3.94951	5.0469	6.94702	8.90973	8.94542	9.94464	9.94464	9.94464	9.94464	10.9439	10.9439	10.9439	11.9431	11.9857	12.9424
	145.774	146.455	147.139	147.868	149.933	151.327	152.735	153.457	154.156	154.156	154.858	154.871	154.897	154.871	154.897	154.897	155.589	155.589	155.589	0	0.68097	1.36559	2.09438	4.15952	5.55366	6.96126	7.68303	8.38197	8.38197	9.0842	9.09711	9.12294	9.09711	9.12294	9.12294	9.8154	9.8154	9.8154
	169.118	169.594	169.594	170.473	171.353	171.353	171.353	171.353	171.828	171.828	171.828	172.653	172.235	172.653	172.235	172.653	172.653	173.118	173.118	0	0.47533	0.47533	1.35457	2.23514	2.23514	2.23514	2.23514	2.7101	2.7101	2.7101	3.53453	3.117	3.53453	3.117	3.53453	3.53453	4.00016	4.00016
	148.553	148.553	149.241	150.655	152.043	153.444	154.156	154.175	155.57	156.311	156.285	157.003	157.003	157.699	158.398	157.699	157.699	157.724	157.699	0	0	0.6884	2.10222	3.48974	4.89078	5.60275	5.6222	7.0169	7.75757	7.73198	8.45016	8.45016	9.14606	9.84521	9.14606	9.14606	9.17142	9.14606
	108.674	108.853	109.49	109.836	110.218	110.82	111.004	111.004	111.463	112.294	111.803	111.987	112.614	112.787	112.787	113.6	113.772	114.425	114.935	0	0.17929	0.81591	1.16242	1.54415	2.14585	2.33068	2.33068	2.78918	3.62044	3.12958	3.31279	3.94057	4.11359	4.11359	4.92636	5.09788	5.75083	6.26094
																			3602 5µM NAA	0	8.83902	20.176	41.9349	64.6368	82.9956	104.43	119.632	133.853	140.172	145.984	152.723	152.768	160.174	163.981	171.703	179.972	186.467	193.08
																				0	2.50869	3.55079	4.9468	7.03027	9.51572	11.332	14.0563	15.2099	15.301	16.3595	15.7373	16.0002	16.1334	17.2889	17.0621	17.7026	16.7211	17.7317
																				0	8.69037	12.3003	17.1362	24.3536	32.9634	39.2552	48.6924	52.6885	53.0043	56.6711	54.5156	55.4263	55.8877	59.8904	59.1047	61.3236	57.9237	61.4243
																				12	12	12	12	12	12	12	12	12	12	12	12	12	12	12	12	12	12	12
																		elongation (NAA-ctl)	3602 5µM NAA	0	4.90835	13.0704	34.5762	56.1556	73.6191	95.7039	111.935	121.886	129.648	134.403	138.797	139.726	150.935	156.816	159.358	170.358	177.221	181.909
																			Standard Error of the Difference Between the Means	0	3.31004	4.00094	5.37914	7.34714	9.76371	11.444	14.1241	15.419	15.4184	16.5164	16.0665	16.3204	16.3536	17.5336	17.7477	18.0435	17.0675	18.2015
3603 Control
	153.912	154.467	153.912	153.912	153.912	153.912	153.912	154.467	155.129	154.564	154.564	154.467	154.467	154.564	154.467	154.467	154.467	155.129	154.467	0	0.55451	0	0	0	0	0	0.55451	1.21667	0.65159	0.65159	0.55451	0.55451	0.65159	0.55451	0.55451	0.55451	1.21667	0.55451
	138.773	139.517	139.517	139.517	139.517	139.603	139.517	140.186	139.603	140.121	139.517	140.186	140.186	140.186	140.186	140.264	140.264	140.264	140.264	0	0.74382	0.74382	0.74382	0.74382	0.82981	0.74382	1.41239	0.82981	1.34818	0.74382	1.41239	1.41239	1.41239	1.41239	1.49084	1.49084	1.49084	1.49084
	198.406	198.406	198.93	198.93	199.324	199.722	199.324	199.722	199.324	199.722	199.324	200.125	200.242	200.125	200.242	200.242	200.242	200.242	199.85	0	0	0.52349	0.52349	0.91771	1.31616	0.91771	1.31616	0.91771	1.31616	0.91771	1.71881	1.8362	1.71881	1.8362	1.8362	1.8362	1.8362	1.44379
	128.035	128.035	128.035	128.035	128.725	128.082	128.082	128.035	128.082	128.035	128.144	128.725	128.082	128.725	128.725	128.725	128.763	128.763	128.763	0	0	0	0	0.68936	0.04685	0.04685	0	0.04685	0	0.1093	0.68936	0.04685	0.68936	0.68936	0.68936	0.7282	0.7282	0.7282
	124.788	125.936	125.718	125.718	125.718	126.289	126.289	126.649	126.289	126.649	126.649	126.649	126.649	127.224	126.874	126.874	126.874	126.649	126.874	0	1.14867	0.93012	0.93012	0.93012	1.50153	1.50153	1.8613	1.50153	1.8613	1.8613	1.8613	1.8613	2.43639	2.08613	2.08613	2.08613	1.8613	2.08613
	149.412	149.833	149.833	150.306	150.306	150.306	150.306	150.306	150.306	150.791	150.791	150.791	150.376	150.791	150.735	150.735	150.735	150.735	151.212	0	0.42106	0.42106	0.89417	0.89417	0.89417	0.89417	0.89417	0.89417	1.37907	1.37907	1.37907	0.96401	1.37907	1.32269	1.32269	1.32269	1.32269	1.79959
	171.817	172.169	172.169	172.169	172.169	172.525	172.525	172.169	172.409	172.525	173.104	172.754	173.104	173.104	173.459	173.459	173.459	173.459	173.459	0	0.35176	0.35176	0.35176	0.35176	0.7086	0.7086	0.35176	0.59264	0.7086	1.28725	0.9374	1.28725	1.28725	1.64217	1.64217	1.64217	1.64217	1.64217
	105.262	105.262	105.759	105.891	105.891	105.759	105.891	106.042	107.168	106.042	106.668	106.668	106.527	106.668	106.527	106.668	106.668	106.827	107.168	0	0	0.49758	0.62987	0.62987	0.49758	0.62987	0.78086	1.90651	0.78086	1.40613	1.40613	1.26541	1.40613	1.26541	1.40613	1.40613	1.56538	1.90651
	210.162	210.583	210.583	210.583	210.851	210.583	210.583	210.583	210.583	210.583	210.44	211.284	210.851	211.547	210.851	211.284	211.284	211.123	211.284	0	0.42069	0.42069	0.42069	0.68882	0.42069	0.42069	0.42069	0.42069	0.42069	0.27818	1.12233	0.68882	1.38485	0.68882	1.12233	1.12233	0.96135	1.12233
																			3603 Control	0	8.56194	9.14522	10.569	13.7481	14.6177	13.7895	17.8549	19.5829	19.9118	20.3067	26.0616	23.3227	29.0826	27.0408	28.5758	28.6672	29.6917	30.0427
																				0	2.71617	2.1429	2.42559	2.13637	3.6248	3.25999	4.17787	3.96528	4.07226	4.04257	3.12538	4.23024	3.7404	3.81144	3.53523	3.49096	2.71039	3.69636
																				0	8.14851	6.42871	7.27676	6.4091	10.8744	9.77996	12.5336	11.8958	12.2168	12.1277	9.37613	12.6907	11.2212	11.4343	10.6057	10.4729	8.13116	11.0891
																				9	9	9	9	9	9	9	9	9	9	9	9	9	9	9	9	9	9	9
3603 5µM NAA
	118.423	117.835	118.423	118.714	119.708	120.416	121.499	122.691	123.685	125.674	126.669	127.566	128.561	129.468	129.757	130.752	131.461	131.746	131.973	0	-0.58834	0	0.29097	1.28501	1.99298	3.076	4.2677	5.26211	7.25121	8.24589	9.1427	10.1383	11.0452	11.3345	12.3287	13.038	13.323	13.5505
	199.279	199.912	200.085	201.884	203.039	204.841	206.167	208.137	210.107	211.092	212.25	213.413	214.22	215.035	215.379	216.19	217.175	218.332	219.317	0	0.63378	0.80628	2.60493	3.76071	5.5627	6.88871	8.85827	10.8284	11.8137	12.9712	14.1341	14.9408	15.7562	16.1	16.911	17.8963	19.0536	20.0384
	128.818	128.818	128.888	129.557	130.908	131.643	133.056	134.536	136.561	137.535	138.946	139.517	140.186	140.929	140.264	141.014	141.014	141.676	141.676	0	0	0.06985	0.73924	2.09066	2.82576	4.23868	5.71854	7.74364	8.71775	10.1283	10.6993	11.3679	12.1114	11.4463	12.1965	12.1965	12.858	12.858
	146.741	146.741	147.709	149.897	152.085	154.738	157.175	159.891	162.086	164.712	166.904	167.72	168.68	169.641	170.602	171.563	171.563	172.525	172.525	0	0	0.9679	3.15536	5.34423	7.99722	10.4338	13.1493	15.3451	17.9706	20.1629	20.9787	21.9389	22.8995	23.8606	24.8221	24.8221	25.7841	25.7841
	156.416	156.285	156.416	158.145	159.261	160.253	161.372	162.364	164.222	165.215	166.46	167.323	167.451	168.443	170.179	170.3	172.166	173.159	174.04	0	-0.13111	0	1.72939	2.84468	3.83682	4.95613	5.94768	7.8063	8.7989	10.0441	10.9069	11.0354	12.0268	13.7632	13.8836	15.7495	16.7428	17.6241
	115.745	115.884	115.745	116.387	117.924	119.206	121.165	122.788	124.964	127.016	129.074	129.835	131.894	132.774	134.618	135.473	136.693	136.883	137	0	0.13815	0	0.64187	2.17829	3.46029	5.41977	7.04303	9.21858	11.2703	13.3282	14.0891	16.1485	17.0288	18.8726	19.7278	20.9477	21.1377	21.2546
	116.829	117.644	117.324	119.541	121.495	123.146	125.431	127.883	129.619	131.244	132.31	132.88	133.81	134.034	134.618	135.093	136.015	136.242	137.058	0	0.8146	0.49541	2.71186	4.66593	6.31732	8.60233	11.0538	12.7897	14.4151	15.4813	16.0507	16.9806	17.2047	17.789	18.2636	19.1858	19.4135	20.2294
	136.235	136.297	136.235	138.091	139.23	141.174	143.126	144.281	146.277	148.165	149.164	149.335	151.053	151.119	151.212	152.118	152.266	153.16	153.264	0	0.06238	0	1.85546	2.99494	4.93856	6.89073	8.04589	10.042	11.9304	12.9292	13.1001	14.8179	14.8841	14.9767	15.8833	16.0311	16.925	17.0294
	106.471	107.299	106.569	107.912	110.027	111.759	113.745	115.849	116.966	118.828	120.071	120.814	121.807	121.926	122.801	122.919	122.919	123.045	123.045	0	0.828	0.09858	1.44135	3.55662	5.28802	7.27468	9.37839	10.4952	12.357	13.6002	14.3433	15.3366	15.4556	16.33	16.448	16.448	16.5741	16.5741
	188.799	188.247	188.939	190.224	191.212	193.041	194.031	196.01	197	198.842	199.832	200.823	200.96	201.814	201.683	202.805	203.666	203.666	204.658	0	-0.55165	0.14031	1.42472	2.41309	4.24262	5.2321	7.21137	8.20117	10.0428	11.0336	12.0245	12.1614	13.0154	12.8841	14.0065	14.8676	14.8676	15.8594
	123.459	123.709	123.146	123.976	125.936	127.315	127.883	129.53	131.244	132.853	134.792	135.915	137.011	138.398	139.517	140.064	140.901	141.736	142.004	0	0.25084	-0.31225	0.5173	2.47799	3.85607	4.42426	6.07142	7.78555	9.3948	11.3339	12.4569	13.5525	14.9395	16.0585	16.6058	17.4422	18.2772	18.545
	133.18	133.18	133.989	134.347	137.295	138.654	140.428	142.215	143.753	144.931	146.113	146.113	146.891	147.092	147.872	148.071	149.05	149.833	151.01	0	0	0.80848	1.16624	4.11497	5.47392	7.24759	9.0343	10.5729	11.7507	12.9326	12.9326	13.7108	13.9115	14.6912	14.8906	15.87	16.6529	17.8296
																			3603 5µM NAA	0	2.56937	5.42318	32.2416	66.5464	98.4114	131.736	168.945	204.771	239.383	268.449	283.737	303.617	317.991	331.8	345.665	360.706	373.255	383.075
																				0	2.81071	2.49227	5.66803	7.19172	9.9633	12.5961	15.2089	16.2127	17.5465	18.694	18.5234	19.5616	19.3328	21.1727	21.3725	20.9999	21.5423	21.3628
																				0	9.73659	8.63347	19.6346	24.9128	34.5139	43.6341	52.6853	56.1624	60.7828	64.758	64.1668	67.7634	66.9707	73.3445	74.0364	72.7458	74.6248	74.0029
																				12	12	12	12	12	12	12	12	12	12	12	12	12	12	12	12	12	12	12
																		elongation (NAA-ctl)	3603 5µM NAA	0	-5.99257	-3.72204	21.6725	52.7984	83.7937	117.946	151.09	185.188	219.471	248.142	257.676	280.295	288.909	304.759	317.089	332.039	343.564	353.033
																			Standard Error of the Difference Between the Means	0	3.90867	3.28686	6.16523	7.50233	10.6022	13.0111	15.7723	16.6905	18.0128	19.1261	18.7852	20.0138	19.6913	21.5131	21.6629	21.2881	21.7122	21.6802
3604 Control
	201.229	200.878	200.878	201.457	201.457	201.457	200.644	202.04	201.122	201.457	202.04	201.457	201.122	201.817	202.04	202.625	201.604	201.817	203.214	0	-0.35066	-0.35066	0.22846	0.22846	0.22846	-0.58477	0.81087	-0.10688	0.22846	0.81087	0.22846	-0.10688	0.58802	0.81087	1.39654	0.37484	0.58802	1.98544
	144.558	144.838	144.9	144.9	145.165	145.165	145.165	145.499	145.165	145.165	145.165	145.499	145.499	145.248	145.784	145.839	145.499	145.839	145.839	0	0.27989	0.34202	0.34202	0.60747	0.60747	0.60747	0.94119	0.60747	0.60747	0.60747	0.94119	0.94119	0.69011	1.22614	1.281	0.94119	1.281	1.281
	111.158	111.306	111.306	111.306	111.306	111.306	112.147	111.306	112.147	111.463	111.463	111.463	112.009	112.009	112.009	112.009	112.147	111.629	112.147	0	0.14833	0.14833	0.14833	0.14833	0.14833	0.98967	0.14833	0.98967	0.30545	0.30545	0.30545	0.85138	0.85138	0.85138	0.85138	0.98967	0.4713	0.98967
	149.857	149.857	149.857	149.857	149.857	150.416	150.416	150.416	150.416	150.785	150.785	150.785	150.785	150.785	151.159	151.347	151.347	151.347	151.347	0	0	0	0	0	0.55949	0.55949	0.55949	0.55949	0.92801	0.92801	0.92801	0.92801	0.92801	1.30226	1.49068	1.49068	1.49068	1.49068
	203.502	203.502	203.735	203.502	203.502	203.735	203.735	204.247	204.475	204.247	204.247	204.247	204.247	204.475	204.475	204.247	204.475	204.475	204.475	0	0	0.23328	0	0	0.23328	0.23328	0.74556	0.9731	0.74556	0.74556	0.74556	0.74556	0.9731	0.9731	0.74556	0.9731	0.9731	0.9731
	120.341	120.83	120.42	120.42	120.341	120.341	120.341	120.768	120.768	120.341	120.768	120.934	120.768	120.83	120.83	120.83	120.83	120.83	120.83	0	0.48928	0.07892	0.07892	0	0	0	0.42719	0.42719	0	0.42719	0.59269	0.42719	0.48928	0.48928	0.48928	0.48928	0.48928	0.48928
	120.071	120.071	120.208	120.354	120.934	121.062	121.062	121.062	121.062	121.062	121.198	121.926	121.926	122.188	122.053	122.053	122.053	122.053	122.053	0	0	0.13734	0.28284	0.86306	0.99116	0.99116	0.99116	0.99116	0.99116	1.12737	1.8554	1.8554	2.11757	1.98246	1.98246	1.98246	1.98246	1.98246
	149.452	150.153	150.416	150.153	150.416	150.153	150.153	150.416	150.416	150.416	150.416	150.416	150.416	150.416	150.416	150.416	150.685	150.685	150.685	0	0.70093	0.96376	0.70093	0.96376	0.70093	0.70093	0.96376	0.96376	0.96376	0.96376	0.96376	0.96376	0.96376	0.96376	0.96376	1.23277	1.23277	1.23277
	150.765	150.765	150.765	150.921	150.921	150.921	150.921	151.605	151.605	151.605	151.605	151.605	151.605	151.605	151.605	151.605	151.605	151.605	151.753	0	0	0	0.15579	0.15579	0.15579	0.15579	0.84003	0.84003	0.84003	0.84003	0.84003	0.84003	0.84003	0.84003	0.84003	0.84003	0.84003	0.98837
	161.307	161.307	161.012	161.307	161.307	161.969	161.969	161.969	161.969	161.969	161.969	161.969	162.262	161.969	162.262	161.969	162.262	162.262	161.969	0	0	-0.29474	0	0	0.66197	0.66197	0.66197	0.66197	0.66197	0.66197	0.66197	0.95497	0.66197	0.95497	0.66197	0.95497	0.95497	0.66197
																			3604 Control	0	2.68345	2.6633	4.1006	6.27987	9.0739	9.1334	15.0062	14.6197	13.2755	15.7008	17.0657	17.7813	19.2685	22.0012	22.654	21.736	21.8093	25.5582
																				0	1.98721	2.44293	1.44193	2.50543	2.12735	3.2579	1.79278	2.32599	2.28955	1.6709	3.00541	3.27426	3.04641	2.67789	3.06056	3.10485	3.2088	3.35108
																				0	6.28411	7.72523	4.55979	7.92286	6.72726	10.3024	5.66928	7.35543	7.24021	5.28384	9.50394	10.3541	9.63361	8.46823	9.67835	9.8184	10.1471	10.5971
																				10	10	10	10	10	10	10	10	10	10	10	10	10	10	10	10	10	10	10
3604 5µM NAA
	226.055	225.08	226.055	228.107	230.107	232.106	234.173	236.172	238.21	239.209	241.207	242.25	243.249	244.248	245.345	246.343	248.244	247.342	249.289	0	-0.97531	0	2.05213	4.0512	6.05028	8.11771	10.1163	12.1547	13.1538	15.1521	16.1946	17.1935	18.1925	19.2894	20.288	22.1885	21.2866	23.2337
	186.261	186.601	186.011	187.856	189.763	191.635	193.879	197.01	199.223	202.386	204.919	206.497	207.762	209.029	210.297	210.623	211.568	212.229	212.84	0	0.34061	-0.24982	1.59576	3.50244	5.3745	7.61826	10.7496	12.9629	16.1252	18.6589	20.2364	21.5013	22.7681	24.0368	24.3623	25.3074	25.9681	26.5797
	187.683	188.47	187.883	187.683	188.664	188.862	189.842	191.024	191.802	192.208	192.982	194.165	195.921	196.705	197.101	197.881	198.285	198.285	199.264	0	0.78692	0.1997	0	0.98048	1.17914	2.1588	3.34032	4.11874	4.52498	5.29862	6.48164	8.23766	9.02212	9.41826	10.198	10.6019	10.6019	11.5804
	192.151	192.263	192.044	193.256	194.487	196.596	198.708	201.814	204.788	206.903	209.876	210.867	213.265	214.255	216.234	217.223	218.213	219.203	219.347	0	0.11186	-0.10671	1.10533	2.33552	4.44505	6.55735	9.66329	12.6367	14.7524	17.7252	18.7163	21.1141	22.1035	24.0827	25.0724	26.0622	27.0521	27.1958
	175.841	175.841	176.511	178.732	180.892	183.774	186.936	191.039	192.271	195.757	198.305	200.524	202.41	203.081	205.572	206.189	207.461	207.791	209.067	0	0	0.66978	2.8908	5.05139	7.93348	11.095	15.1984	16.4298	19.9167	22.4645	24.6835	26.5696	27.2404	29.7315	30.3484	31.62	31.9499	33.2261
	282.392	282.392	284.382	287.467	288.669	291.652	293.097	296.076	297.834	299.822	300.927	302.035	302.914	304.792	305.895	306.889	307.774	308.877	309.763	0	0	1.99022	5.07495	6.27779	9.26062	10.7057	13.6844	15.4423	17.43	18.5353	19.6432	20.5226	22.4002	23.5038	24.4977	25.3827	26.4854	27.3712
	227.862	227.862	228.849	230.825	232.957	233.788	235.614	237.741	239.201	241.406	242.539	242.539	243.387	243.387	243.528	244.377	244.377	245.098	245.098	0	0	0.9875	2.96281	5.09528	5.92657	7.75229	9.87966	11.339	13.5445	14.6769	14.6769	15.5247	15.5247	15.6664	16.515	16.515	17.2361	17.2361
	170.329	170.766	171.479	173.488	176.647	179.725	182.428	185.162	188.048	189.56	191.76	193.003	195.205	197.122	198.081	198.95	199.905	201.241	201.457	0	0.43683	1.14977	3.15866	6.31745	9.3957	12.099	14.833	17.7188	19.2309	21.4312	22.6735	24.8759	26.7927	27.7517	28.6206	29.5759	30.9121	31.1281
	137.117	137.768	137.768	139.442	141.23	143.377	146.509	149.643	152.778	155.724	157.496	159.248	160.823	162.388	163.957	164.347	165.738	166.715	167.487	0	0.65118	0.65118	2.325	4.11357	6.26039	9.39265	12.5262	15.6609	18.6074	20.3793	22.1315	23.7061	25.2717	26.8406	27.2305	28.621	29.5986	30.3706
	136.821	136.821	136.4	138.246	139.979	142.127	144.309	146.741	148.432	150.373	151.585	154.029	155.232	156.438	157.41	158.152	158.862	159.59	160.1	0	0	-0.4209	1.42511	3.15752	5.30565	7.48765	9.92022	11.6107	13.5518	14.7639	17.2082	18.411	19.6174	20.5892	21.3308	22.0405	22.769	23.2789
	115.412	116.25	116.25	117.239	119.365	120.354	122.332	125.447	126.436	129.259	130.392	132.371	133.36	134.495	136.33	136.33	137.321	137.321	137.321	0	0.83743	0.83743	1.82677	3.95269	4.94135	6.91922	10.0349	11.0234	13.8471	14.9794	16.9584	17.9481	19.0831	20.9182	20.9182	21.9085	21.9085	21.9085
	155.708	155.242	155.955	157.175	159.831	161.298	164.201	166.643	170.262	172.447	173.666	175.602	176.57	178.757	179.477	180.693	182.631	182.631	183.6	0	-0.46631	0.24706	1.467	4.1231	5.5898	8.49304	10.9353	14.5535	16.739	17.9583	19.8938	20.862	23.0488	23.769	24.9851	26.9227	26.9227	27.8921
	120.702	121.413	121.413	122.691	125.399	127.393	130.553	133.304	136.528	139.23	141.51	142.594	144.281	146.219	146.492	148.165	148.273	149.405	149.482	0	0.71041	0.71041	1.98856	4.69725	6.69098	9.85056	12.602	15.8263	18.5279	20.8076	21.8917	23.5789	25.5169	25.7902	27.4633	27.5713	28.7034	28.7803
	241.994	241.994	242.258	243.249	245.231	247.946	250.056	252.438	254.702	257.257	258.519	259.509	260.64	261.773	262.909	263.898	265.036	266.865	267.711	0	0	0.26433	1.25504	3.2367	5.95176	8.06219	10.4443	12.708	15.2629	16.5251	17.5153	18.6458	19.779	20.9149	21.9039	23.042	24.8713	25.7169
	143.004	143.293	143.293	144.544	148.007	151.529	155.361	157.851	161.012	163.884	165.801	167.045	168.404	169.921	170.88	171.563	172.8	173.081	173.761	0	0.28991	0.28991	1.54061	5.00326	8.52538	12.3574	14.8477	18.0089	20.8806	22.7976	24.0414	25.4008	26.9171	27.8766	28.5599	29.797	30.0774	30.7578
																			3604 5µM NAA	0	3.8432	10.188	43.2767	87.3416	130.994	181.563	238.161	285.319	333.157	369.928	399.269	429.108	456.181	480.031	497.126	518.099	531.062	545.051
																				0	2.66414	3.38396	6.36199	7.6705	11.3254	13.9446	16.2152	18.905	21.8078	23.8764	24.6486	25.3356	26.9527	28.5576	28.6498	29.8563	31.0107	31.0152
																				0	10.3182	13.106	24.6399	29.7077	43.8632	54.0073	62.8011	73.2189	84.4611	92.4729	95.4637	98.1242	104.387	110.603	110.96	115.633	120.104	120.121
																				15	15	15	15	15	15	15	15	15	15	15	15	15	15	15	15	15	15	15
																		elongation (NAA-ctl)	3604 5µM NAA	0	1.15976	7.52473	39.1761	81.0618	121.92	172.43	223.155	270.699	319.881	354.227	382.203	411.327	436.913	458.03	474.472	496.363	509.253	519.492
																			Standard Error of the Difference Between the Means	0	3.32365	4.17362	6.52335	8.06931	11.5235	14.3201	16.314	19.0476	21.9276	23.9348	24.8312	25.5463	27.1243	28.6829	28.8128	30.0173	31.1762	31.1957
Col-0(c) Control
	210.281	210.04	210.459	210.459	210.459	210.459	210.281	209.848	209.848	210.04	210.04	210.04	210.04	210.04	210.04	210.04	210.04	210.04	210.04	0	-0.24029	0.17826	0.17826	0.17826	0.17826	0	-0.4332	-0.4332	-0.24029	-0.24029	-0.24029	-0.24029	-0.24029	-0.24029	-0.24029	-0.24029	-0.24029	-0.24029
	251.247	250.46	251.056	251.247	251.247	251.247	250.354	250.354	250.354	250.354	250.354	250.354	250.354	250.46	250.46	250.354	250.46	250.354	250.354	0	-0.78731	-0.19112	0	0	0	-0.89314	-0.89314	-0.89314	-0.89314	-0.89314	-0.89314	-0.89314	-0.78731	-0.78731	-0.89314	-0.78731	-0.89314	-0.89314
	182.989	182.989	182.989	182.989	183.096	183.883	183.883	183.883	183.883	183.883	183.883	183.883	183.883	183.883	183.883	182.989	182.989	183.883	183.883	0	0	0	0	0.10653	0.89405	0.89405	0.89405	0.89405	0.89405	0.89405	0.89405	0.89405	0.89405	0.89405	0	0	0.89405	0.89405
	209.888	210.583	210.583	210.583	210.851	211.026	210.851	210.583	210.851	210.583	210.583	210.851	210.851	210.851	210.851	210.851	210.851	211.123	210.851	0	0.69446	0.69446	0.69446	0.96259	1.13799	0.96259	0.69446	0.96259	0.69446	0.69446	0.96259	0.96259	0.96259	0.96259	0.96259	0.96259	1.23512	0.96259
	250.577	249.874	250.14	250.41	250.41	250.41	250.41	250.41	250.683	250.683	250.41	250.41	250.41	250.41	250.41	250.41	250.14	250.14	250.14	0	-0.70336	-0.43737	-0.16767	-0.16767	-0.16767	-0.16767	-0.16767	0.10574	0.10574	-0.16767	-0.16767	-0.16767	-0.16767	-0.16767	-0.16767	-0.43737	-0.43737	-0.43737
	290.367	291.673	291.496	291.496	292.139	291.673	291.496	291.673	291.496	291.673	291.673	291.496	291.496	291.496	291.496	291.496	291.673	291.496	291.496	0	1.30575	1.12913	1.12913	1.77166	1.30575	1.12913	1.30575	1.12913	1.30575	1.30575	1.12913	1.12913	1.12913	1.12913	1.12913	1.30575	1.12913	1.12913
	218.673	218.799	218.323	218.799	218.799	218.799	218.673	218.673	218.073	217.938	217.938	217.938	218.435	218.435	218.435	218.435	218.673	218.435	218.552	0	0.12572	-0.35012	0.12572	0.12572	0.12572	0	0	-0.59989	-0.73521	-0.73521	-0.73521	-0.23792	-0.23792	-0.23792	-0.23792	0	-0.23792	-0.12122
	225.499	225.568	224.804	225.568	225.568	225.568	225.568	225.568	226.566	226.716	226.797	226.797	226.797	226.797	226.797	226.797	227.636	227.713	227.636	0	0.06872	-0.69509	0.06872	0.06872	0.06872	0.06872	0.06872	1.06621	1.21623	1.29782	1.29782	1.29782	1.29782	1.29782	1.29782	2.13622	2.21309	2.13622
	224.154	224.154	224.154	224.154	224.154	223.886	223.886	223.45	224.294	224.294	224.294	224.294	224.154	224.154	224.154	224.154	224.154	224.154	224.154	0	0	0	0	0	-0.26783	-0.26783	-0.70374	0.14049	0.14049	0.14049	0.14049	0	0	0	0	0	0	0
																			Col-0 (c) Control	0	1.09053	0.77176	4.77101	7.16329	7.70229	4.05894	1.79971	5.57855	5.8516	5.40046	5.61568	6.45482	6.70372	6.70372	4.35215	6.91348	8.61406	8.06678
																				0	4.56994	4.03046	2.93079	4.41068	4.14401	4.71467	5.25329	5.51545	5.69102	5.86549	5.84777	5.45859	5.31791	5.31791	5.25953	6.6486	7.10403	6.74835
																				0	13.7098	12.0914	8.79236	13.232	12.432	14.144	15.7599	16.5463	17.0731	17.5965	17.5433	16.3758	15.9537	15.9537	15.7786	19.9458	21.3121	20.2451
																				9	9	9	9	9	9	9	9	9	9	9	9	9	9	9	9	9	9	9
Col-0(c) 5µM NAA
	129.468	130.384	130.465	133.375	135.37	138.232	140.228	141.287	143.349	145.221	146.219	148.216	149.121	150.163	151.119	151.162	152.118	152.161	153.118	0	0.91591	0.99641	3.90727	5.90172	8.76355	10.7602	11.8188	13.8811	15.7524	16.7509	18.7479	19.6526	20.6951	21.651	21.694	22.6502	22.693	23.6495
	210.238	211.218	212.198	214.159	215.539	216.91	217.497	219.258	220.239	222.2	222.991	223.376	224.555	225.338	226.318	226.318	226.515	227.108	227.299	0	0.97994	1.96006	3.92086	5.3009	6.67216	7.25917	9.01988	10.0006	11.9624	12.7531	13.1384	14.3172	15.0996	16.0804	16.0804	16.2769	16.8699	17.0614
	198.177	198.494	199.472	202.615	204.783	205.76	207.171	209.881	210.647	212.812	213.79	215.539	216.723	217.702	217.702	218.68	218.68	219.1	219.659	0	0.31764	1.29511	4.43871	6.60612	7.58288	8.99474	11.7042	12.4699	14.6354	15.6129	17.3622	18.5466	19.5249	19.5249	20.5034	20.5034	20.9237	21.4821
	136.565	137.084	137.084	137.481	138.004	138.398	139.205	140.118	141.549	141.947	142.864	144.18	144.586	145.097	145.499	145.907	145.907	146.54	146.414	0	0.51892	0.51892	0.91591	1.43862	1.83298	2.63988	3.55281	4.98358	5.38217	6.29857	7.61544	8.02061	8.53152	8.93414	9.3425	9.3425	9.9751	9.8488
	185.149	185.443	187.259	189.391	191.859	193.499	195.474	197.99	199.424	201.4	203.226	204.216	206.051	207.041	207.762	208.031	208.173	208.885	209.022	0	0.29412	2.11059	4.24254	6.71073	8.35076	10.3252	12.8413	14.2756	16.2515	18.0779	19.067	20.9024	21.8925	22.6133	22.8827	23.0244	23.7365	23.8729
	115	114.809	116.4	118.229	119.808	121.037	122.613	124.016	126.036	127.44	128.226	129.468	131.034	131.034	131.21	131.4	132.28	132.28	132.439	0	-0.19146	1.40017	3.22859	4.80818	6.03718	7.61321	9.01613	11.0357	12.4402	13.2264	14.4681	16.0343	16.0343	16.2098	16.4001	17.28	17.28	17.4387
	134.618	135.281	135.949	137.441	139.517	141.014	143.087	145.041	145.911	147.323	149.335	149.402	150.147	151.486	151.486	151.559	151.559	151.644	151.644	0	0.66321	1.33054	2.82292	4.89904	6.3962	8.46941	10.4234	11.293	12.7048	14.7172	14.7842	15.5286	16.868	16.868	16.9406	16.9406	17.0263	17.0263
	213.434	214.021	214.021	214.83	215.295	216.113	217.849	218.662	219.477	220.293	221.111	222.266	223.081	223.323	223.897	224.143	224.715	224.397	224.715	0	0.5872	0.5872	1.39634	1.86132	2.67957	4.41474	5.22801	6.04282	6.85916	7.677	8.83178	9.64687	9.88881	10.4635	10.709	11.2816	10.9631	11.2816
	243.797	244.43	243.797	244.573	245.98	246.757	248.316	249.098	251.287	252.692	254.096	254.719	255.501	256.125	256.907	256.907	257.531	257.531	257.531	0	0.6329	0	0.77605	2.18262	2.95992	4.51928	5.30132	7.48964	8.89446	10.2994	10.9224	11.7044	12.3279	13.1096	13.1096	13.7335	13.7335	13.7335
	172.534	173.104	174.184	176.139	176.963	178.617	180.006	181.11	182.497	183.883	185.27	186.102	186.936	187.771	188.322	189.156	189.156	189.992	189.992	0	0.56996	1.64976	3.6051	4.42922	6.08286	7.47151	8.57641	9.96253	11.3491	12.736	13.5681	14.4018	15.2371	15.7875	16.622	16.622	17.4581	17.4581
	195.133	195.78	196.237	198.494	200.562	202.726	204.137	206.206	208.943	210.354	211.691	213.178	214.59	215.258	216.002	216.086	216.749	217.414	217.414	0	0.6472	1.10381	3.36104	5.42842	7.59313	9.00392	11.0729	13.8093	15.2212	16.5575	18.045	19.457	20.1247	20.869	20.9523	21.6154	22.2811	22.2811
	161.152	161.419	161.697	164.195	166.412	169.461	171.406	173.623	175.011	177.229	178.891	179.446	180.834	181.665	183.052	183.33	183.883	184.44	184.716	0	0.26661	0.54515	3.04291	5.26004	8.30881	10.2538	12.4711	13.8593	16.0766	17.7389	18.2943	19.6821	20.5124	21.8998	22.1782	22.731	23.2876	23.5639
																			Col-0 (c) 5µM NAA	0	10.9399	23.8085	62.8972	96.7086	129.223	161.793	195.838	227.723	260.225	286.536	308.407	331.425	347.022	359.853	365.857	373.947	381.402	385.759
																				0	1.92077	3.8497	7.75489	10.9422	14.4659	15.7923	18.9125	19.4812	22.264	23.4489	23.9592	25.7964	26.9163	27.5962	27.6396	28.065	28.8321	29.674
																				0	6.65373	13.3357	26.8637	37.905	50.1113	54.7061	65.5149	67.4849	77.1248	81.2294	82.9972	89.3613	93.2409	95.5961	95.7465	97.22	99.8773	102.794
																				12	12	12	12	12	12	12	12	12	12	12	12	12	12	12	12	12	12	12
																		elongation (NAA-ctl)	Col-0 (c) 5µM NAA	0	9.84937	23.0367	58.1262	89.5453	121.52	157.734	194.038	222.145	254.374	281.136	302.791	324.97	340.318	353.149	361.505	367.034	372.788	377.692
																			Standard Error of the Difference Between the Means	0	4.95719	5.57358	8.29023	11.7977	15.0477	16.481	19.6286	20.2469	22.9799	24.1714	24.6626	26.3676	27.4366	28.1039	28.1356	28.8418	29.6944	30.4317
