# Supplementary material for: Genetic analysis of the Arabidopsis TIR1/AFB auxin receptors reveals both overlapping and specialized functions
Source: eLife. 2020 Feb 18;9:e54740. doi: 10.7554/eLife.54740 (PMC7048394; doi:10.7554/eLife.54740)
Supplement: Figure 6—source data 1. [file elife-54740-fig6-data1.xlsx]

## Sheet: RAW_DATA
EXP	Genotype	Condition	Time	Root	Nbr	Label	Feret	FeretX	FeretY	FeretAngle	Min Feret	Lenght	Area_response	lenght (um)
1	WT	DMSO	0	1	1	channel1:WT_DMSO_T0001_00010_CH4	3.085	0.219	0	96.981	0.844	0	0.4125	0
1	WT	DMSO	25	1	2	channel1:WT_DMSO_T0002_00010_CH4	3.118	0.219	0	97.101	0.844	0.033	0.875	5.99432
1	WT	DMSO	50	1	3	channel1:WT_DMSO_T0003_00010_CH4	3.122	0.302	0	96.129	0.844	0.037	1.1375	6.72091
1	WT	DMSO	75	1	4	channel1:WT_DMSO_T0004_00010_CH4	3.139	0.323	0	95.332	0.844	0.054	1.825	9.80889
1	WT	DMSO	100	1	5	channel1:WT_DMSO_T0005_00010_CH4	3.177	0.219	0	96.589	0.844	0.092	2.525	16.7114
1	WT	DMSO	125	1	6	channel1:WT_DMSO_T0006_00010_CH4	3.195	0.219	0	95.989	0.844	0.11	2.8375	19.9811
1	WT	DMSO	150	1	7	channel1:WT_DMSO_T0007_00010_CH4	3.202	0.219	0	97.102	0.844	0.117	2.8125	21.2526
1	WT	DMSO	175	1	8	channel1:WT_DMSO_T0008_00010_CH4	3.193	0.219	0	95.804	0.844	0.108	3.0625	19.6178
1	WT	DMSO	200	1	9	channel1:WT_DMSO_T0009_00010_CH4	3.222	0.219	0	97.056	0.844	0.137	3.575	24.8855
1	WT	DMSO	225	1	10	channel1:WT_DMSO_T0010_00010_CH4	3.234	0.208	0	97.217	0.844	0.149	4	27.0653
1	WT	DMSO	250	1	11	channel1:WT_DMSO_T0011_00010_CH4	3.256	0.208	0	97.352	0.844	0.171	4.5	31.0615
1	WT	DMSO	275	1	12	channel1:WT_DMSO_T0012_00010_CH4	3.274	0.208	0	96.944	0.844	0.189	4.6125	34.3311
1	WT	DMSO	300	1	13	channel1:WT_DMSO_T0013_00010_CH4	3.265	0.208	0	97.148	0.844	0.18	4.6125	32.6963
1	WT	DMSO	325	1	14	channel1:WT_DMSO_T0014_00010_CH4	3.274	0.208	0	96.944	0.844	0.189	5.1125	34.3311
1	WT	DMSO	350	1	15	channel1:WT_DMSO_T0015_00010_CH4	3.305	0.208	0	96.879	0.844	0.22	5.35	39.9622
1	WT	DMSO	375	1	16	channel1:WT_DMSO_T0016_00010_CH4	3.293	0.208	0	96.72	0.844	0.208	5.225	37.7824
1	WT	DMSO	400	1	17	channel1:WT_DMSO_T0017_00010_CH4	3.295	0.219	0	95.26	0.844	0.21	5.375	38.1457
1	WT	DMSO	425	1	18	channel1:WT_DMSO_T0018_00010_CH4	3.305	0.219	0	95.243	0.844	0.22	5.5	39.9622
1	WT	DMSO	450	1	19	channel1:WT_DMSO_T0019_00010_CH4	3.305	0.208	0	95.243	0.844	0.22	5.4875	39.9622
1	WT	DMSO	475	1	20	channel1:WT_DMSO_T0020_00010_CH4	3.304	0.229	0	96.699	0.844	0.219	5.6375	39.7805
1	WT	DMSO	500	1	21	channel1:WT_DMSO_T0021_00010_CH4	3.317	0.229	0	95.406	0.844	0.232	6.2625	42.1419
1	WT	DMSO	525	1	22	channel1:WT_DMSO_T0022_00010_CH4	3.354	0.219	0	96.419	0.844	0.269	6.6	48.8628
1	WT	DMSO	550	1	23	channel1:WT_DMSO_T0023_00010_CH4	3.344	0.219	0	96.439	0.844	0.259	6.55	47.0464
1	WT	DMSO	575	1	24	channel1:WT_DMSO_T0024_00010_CH4	3.35	0.219	0	95.711	0.844	0.265	6.5875	48.1362
1	WT	DMSO	600	1	25	channel1:WT_DMSO_T0025_00010_CH4	3.347	0.229	0	95.178	0.844	0.262	6.65	47.5913
1	WT	DMSO	625	1	26	channel1:WT_DMSO_T0026_00010_CH4	3.355	0.229	0	94.631	0.844	0.27	6.825	49.0445
1	WT	DMSO	650	1	27	channel1:WT_DMSO_T0027_00010_CH4	3.361	0.24	0	95.87	0.844	0.276	7.3375	50.1343
1	WT	DMSO	675	1	28	channel1:WT_DMSO_T0028_00010_CH4	3.396	0.229	0	96.34	0.844	0.311	7.5375	56.492
1	WT	DMSO	700	1	29	channel1:WT_DMSO_T0029_00010_CH4	3.377	0.24	0	94.954	0.844	0.292	7.5125	53.0407
1	WT	DMSO	725	1	30	channel1:WT_DMSO_T0030_00010_CH4	3.394	0.229	0	95.991	0.844	0.309	7.6125	56.1287
1	WT	DMSO	750	1	31	channel1:WT_DMSO_T0031_00010_CH4	3.385	0.229	0	96.36	0.844	0.3	7.5875	54.4939
1	WT	DMSO	775	1	32	channel1:WT_DMSO_T0032_00010_CH4	3.392	0.396	0	93.521	0.844	0.307	7.9375	55.7654
1	WT	DMSO	800	1	33	channel1:WT_DMSO_T0033_00010_CH4	3.413	0.24	0	95.78	0.844	0.328	8.4625	59.5799
1	WT	DMSO	825	1	34	channel1:WT_DMSO_T0034_00010_CH4	3.434	0.229	0	95.745	0.844	0.349	8.7375	63.3945
1	WT	DMSO	850	1	35	channel1:WT_DMSO_T0035_00010_CH4	3.435	0.229	0	95.918	0.844	0.35	8.8875	63.5762
1	WT	DMSO	875	1	36	channel1:WT_DMSO_T0036_00010_CH4	3.446	0.229	0	96.072	0.844	0.361	8.925	65.5743
1	WT	DMSO	900	1	37	channel1:WT_DMSO_T0037_00010_CH4	3.438	0.229	0	94.519	0.844	0.353	9.35	64.1211
1	WT	DMSO	925	1	38	channel1:WT_DMSO_T0038_00010_CH4	3.48	0.229	0	94.635	0.844	0.395	9.65	71.7502
1	WT	DMSO	950	1	39	channel1:WT_DMSO_T0039_00010_CH4	3.462	0.229	0	95.179	0.844	0.377	9.3875	68.4806
1	WT	DMSO	975	1	40	channel1:WT_DMSO_T0040_00010_CH4	3.459	0.229	0	94.663	0.844	0.374	9.6125	67.9357
1	WT	DMSO	1000	1	41	channel1:WT_DMSO_T0041_00010_CH4	3.48	0.229	0	94.635	0.844	0.395	10.175	71.7502
1	WT	DMSO	1025	1	42	channel1:WT_DMSO_T0042_00010_CH4	3.504	0.229	0	95.117	0.844	0.419	10.6875	76.1097
1	WT	DMSO	1050	1	43	channel1:WT_DMSO_T0043_00010_CH4	3.521	0.229	0	94.412	0.844	0.436	11.05	79.1977
1	WT	DMSO	1075	1	44	channel1:WT_DMSO_T0044_00010_CH4	3.533	0.229	0	94.736	0.844	0.448	10.9625	81.3775
1	WT	DMSO	1100	1	45	channel1:WT_DMSO_T0045_00010_CH4	3.514	0.229	0	95.102	0.844	0.429	11.2625	77.9262
1	WT	DMSO	1125	1	46	channel1:WT_DMSO_T0046_00010_CH4	3.557	0.229	0	95.377	0.844	0.472	11.4625	85.737
1	WT	DMSO	1150	1	47	channel1:WT_DMSO_T0047_00010_CH4	3.53	0.229	0	96.097	0.844	0.445	11.4375	80.8325
1	WT	DMSO	1175	1	48	channel1:WT_DMSO_T0048_00010_CH4	3.555	0.229	0	95.042	0.844	0.47	12.1125	85.3737
1	WT	DMSO	1200	1	49	channel1:WT_DMSO_T0049_00010_CH4	3.584	0.229	0	94.501	0.844	0.499	12.35	90.6414
1	WT	DMSO	1225	1	50	channel1:WT_DMSO_T0050_00010_CH4	3.574	0.229	0	94.514	0.844	0.489	333.988	88.825
1	WT	DMSO	0	2	1	channel1:WT_DMSO_T0001_00011_CH4	2.511	0.219	0	117.415	0.676	0	0.3	0
1	WT	DMSO	25	2	2	channel1:WT_DMSO_T0002_00011_CH4	2.535	0.208	0	117.934	0.675	0.024	1.0625	4.35951
1	WT	DMSO	50	2	3	channel1:WT_DMSO_T0003_00011_CH4	2.572	0.208	0	117.499	0.676	0.061	1.5875	11.0804
1	WT	DMSO	75	2	4	channel1:WT_DMSO_T0004_00011_CH4	2.577	0.208	0	117.705	0.676	0.066	1.7625	11.9886
1	WT	DMSO	100	2	5	channel1:WT_DMSO_T0005_00011_CH4	2.586	0.208	0	117.597	0.677	0.075	2.2875	13.6235
1	WT	DMSO	125	2	6	channel1:WT_DMSO_T0006_00011_CH4	2.619	0.198	0	117.992	0.677	0.108	2.925	19.6178
1	WT	DMSO	150	2	7	channel1:WT_DMSO_T0007_00011_CH4	2.637	0.198	0	117.78	0.674	0.126	3.325	22.8874
1	WT	DMSO	175	2	8	channel1:WT_DMSO_T0008_00011_CH4	2.651	0.198	0	117.874	0.675	0.14	3.675	25.4305
1	WT	DMSO	200	2	9	channel1:WT_DMSO_T0009_00011_CH4	2.665	0.198	0	117.466	0.677	0.154	4.025	27.9735
1	WT	DMSO	225	2	10	channel1:WT_DMSO_T0010_00011_CH4	2.679	0.198	0	117.561	0.678	0.168	4.2625	30.5166
1	WT	DMSO	250	2	11	channel1:WT_DMSO_T0011_00011_CH4	2.684	0.198	0	117.759	0.677	0.173	4.5	31.4248
1	WT	DMSO	275	2	12	channel1:WT_DMSO_T0012_00011_CH4	2.698	0.198	0	117.851	0.677	0.187	4.7875	33.9678
1	WT	DMSO	300	2	13	channel1:WT_DMSO_T0013_00011_CH4	2.707	0.198	0	117.748	0.678	0.196	5.075	35.6026
1	WT	DMSO	325	2	14	channel1:WT_DMSO_T0014_00011_CH4	2.721	0.198	0	117.84	0.674	0.21	5.3125	38.1457
1	WT	DMSO	350	2	15	channel1:WT_DMSO_T0015_00011_CH4	2.726	0.198	0	118.034	0.675	0.215	5.325	39.0539
1	WT	DMSO	375	2	16	channel1:WT_DMSO_T0016_00011_CH4	2.722	0.219	0	118.33	0.674	0.211	5.5625	38.3273
1	WT	DMSO	400	2	17	channel1:WT_DMSO_T0017_00011_CH4	2.745	0.198	0	118.315	0.675	0.234	5.9	42.5052
1	WT	DMSO	425	2	18	channel1:WT_DMSO_T0018_00011_CH4	2.749	0.219	0	117.536	0.677	0.238	6.125	43.2318
1	WT	DMSO	450	2	19	channel1:WT_DMSO_T0019_00011_CH4	2.763	0.198	0	118.111	0.674	0.252	6.3625	45.7748
1	WT	DMSO	475	2	20	channel1:WT_DMSO_T0020_00011_CH4	2.768	0.198	0	118.301	0.676	0.257	6.6	46.6831
1	WT	DMSO	500	2	21	channel1:WT_DMSO_T0021_00011_CH4	2.782	0.198	0	117.908	0.678	0.271	6.6	49.2261
1	WT	DMSO	525	2	22	channel1:WT_DMSO_T0022_00011_CH4	2.768	0.219	0.01	117.819	0.677	0.257	6.3625	46.6831
1	WT	DMSO	550	2	23	channel1:WT_DMSO_T0023_00011_CH4	2.763	0.271	0	115.696	0.676	0.252	6.7125	45.7748
1	WT	DMSO	575	2	24	channel1:WT_DMSO_T0024_00011_CH4	2.796	0.219	0	117.997	0.676	0.285	7.0625	51.7692
1	WT	DMSO	600	2	25	channel1:WT_DMSO_T0025_00011_CH4	2.791	0.219	0	117.808	0.674	0.28	7.175	50.8609
1	WT	DMSO	625	2	26	channel1:WT_DMSO_T0026_00011_CH4	2.805	0.198	0	117.422	0.68	0.294	7.375	53.404
1	WT	DMSO	650	2	27	channel1:WT_DMSO_T0027_00011_CH4	2.807	0.198	0	118.848	0.674	0.296	7.625	53.7673
1	WT	DMSO	675	2	28	channel1:WT_DMSO_T0028_00011_CH4	2.825	0.198	0	118.644	0.674	0.314	8.1875	57.0369
1	WT	DMSO	700	2	29	channel1:WT_DMSO_T0029_00011_CH4	2.852	0.198	0	118.343	0.674	0.341	8.5375	61.9413
1	WT	DMSO	725	2	30	channel1:WT_DMSO_T0030_00011_CH4	2.853	0.198	0	118.811	0.677	0.342	8.6	62.123
1	WT	DMSO	750	2	31	channel1:WT_DMSO_T0031_00011_CH4	2.857	0.198	0	118.527	0.678	0.346	8.5875	62.8496
1	WT	DMSO	775	2	32	channel1:WT_DMSO_T0032_00011_CH4	2.852	0.198	0	118.343	0.678	0.341	8.7	61.9413
1	WT	DMSO	800	2	33	channel1:WT_DMSO_T0033_00011_CH4	2.866	0.208	0	117.962	0.675	0.355	9.0125	64.4844
1	WT	DMSO	825	2	34	channel1:WT_DMSO_T0034_00011_CH4	2.877	0.188	0	119.256	0.674	0.366	8.725	66.4825
1	WT	DMSO	850	2	35	channel1:WT_DMSO_T0035_00011_CH4	2.843	0.271	0	117.974	0.674	0.332	8.65	60.3065
1	WT	DMSO	875	2	36	channel1:WT_DMSO_T0036_00011_CH4	2.871	0.219	0	118.61	0.675	0.36	8.9875	65.3926
1	WT	DMSO	900	2	37	channel1:WT_DMSO_T0037_00011_CH4	2.87	0.26	0	117.216	0.678	0.359	9.4125	65.211
1	WT	DMSO	925	2	38	channel1:WT_DMSO_T0038_00011_CH4	2.905	0.198	0	118.955	0.677	0.394	9.675	71.5686
1	WT	DMSO	950	2	39	channel1:WT_DMSO_T0039_00011_CH4	2.891	0.229	0	118.874	0.679	0.38	9.4875	69.0255
1	WT	DMSO	975	2	40	channel1:WT_DMSO_T0040_00011_CH4	2.89	0.24	0	118.413	0.677	0.379	9.65	68.8439
1	WT	DMSO	1000	2	41	channel1:WT_DMSO_T0041_00011_CH4	2.904	0.229	0	118.496	0.674	0.393	10	71.3869
1	WT	DMSO	1025	2	42	channel1:WT_DMSO_T0042_00011_CH4	2.918	0.26	0	118.578	0.675	0.407	10.2875	73.93
1	WT	DMSO	1050	2	43	channel1:WT_DMSO_T0043_00011_CH4	2.927	0.24	0	118.48	0.679	0.416	10.5625	75.5648
1	WT	DMSO	1075	2	44	channel1:WT_DMSO_T0044_00011_CH4	2.94	0.208	0	117.655	0.679	0.429	10.625	77.9262
1	WT	DMSO	1100	2	45	channel1:WT_DMSO_T0045_00011_CH4	2.932	0.24	0	118.659	0.679	0.421	10.825	76.473
1	WT	DMSO	1125	2	46	channel1:WT_DMSO_T0046_00011_CH4	2.956	0.188	0	119.094	0.679	0.445	11.2125	80.8325
1	WT	DMSO	1150	2	47	channel1:WT_DMSO_T0047_00011_CH4	2.963	0.177	0	119.72	0.675	0.452	11.6125	82.1041
1	WT	DMSO	1175	2	48	channel1:WT_DMSO_T0048_00011_CH4	2.988	0.188	0	118.531	0.677	0.477	12.0375	86.6452
1	WT	DMSO	1200	2	49	channel1:WT_DMSO_T0049_00011_CH4	2.997	0.177	0	118.436	0.676	0.486	12.35	88.28
1	WT	DMSO	1225	2	50	channel1:WT_DMSO_T0050_00011_CH4	3.013	0.177	0	119.401	0.677	0.502	345.4	91.1864
1	WT	DMSO	0	3	1	channel1:WT_DMSO_T0001_00012_CH4	2.317	0.635	2.281	79.902	0.643	0	0.3625	0
1	WT	DMSO	25	3	2	channel1:WT_DMSO_T0002_00012_CH4	2.346	0.635	2.312	80.287	0.635	0.029	0.875	5.26774
1	WT	DMSO	50	3	3	channel1:WT_DMSO_T0003_00012_CH4	2.358	0.625	2.323	80.08	0.635	0.041	1.3875	7.44749
1	WT	DMSO	75	3	4	channel1:WT_DMSO_T0004_00012_CH4	2.387	0.625	2.354	80.455	0.644	0.07	2.1375	12.7152
1	WT	DMSO	100	3	5	channel1:WT_DMSO_T0005_00012_CH4	2.418	0.625	2.385	80.578	0.642	0.101	2.7	18.3463
1	WT	DMSO	125	3	6	channel1:WT_DMSO_T0006_00012_CH4	2.432	0.604	2.396	80.134	0.643	0.115	3.125	20.8893
1	WT	DMSO	150	3	7	channel1:WT_DMSO_T0007_00012_CH4	2.452	0.604	2.417	80.218	0.635	0.135	3.6125	24.5222
1	WT	DMSO	175	3	8	channel1:WT_DMSO_T0008_00012_CH4	2.471	0.604	2.438	80.538	0.634	0.154	4.3875	27.9735
1	WT	DMSO	200	3	9	channel1:WT_DMSO_T0009_00012_CH4	2.514	0.594	2.479	80.46	0.638	0.197	4.6875	35.7843
1	WT	DMSO	225	3	10	channel1:WT_DMSO_T0010_00012_CH4	2.495	0.583	2.458	80.144	0.642	0.178	4.5625	32.333
1	WT	DMSO	250	3	11	channel1:WT_DMSO_T0011_00012_CH4	2.504	0.583	2.469	80.42	0.641	0.187	5.1625	33.9678
1	WT	DMSO	275	3	12	channel1:WT_DMSO_T0012_00012_CH4	2.543	0.583	2.51	80.808	0.637	0.226	5.4	41.052
1	WT	DMSO	300	3	13	channel1:WT_DMSO_T0013_00012_CH4	2.523	0.562	2.49	80.732	0.635	0.206	5.4375	37.4191
1	WT	DMSO	325	3	14	channel1:WT_DMSO_T0014_00012_CH4	2.546	0.552	2.51	80.345	0.634	0.229	5.95	41.597
1	WT	DMSO	350	3	15	channel1:WT_DMSO_T0015_00012_CH4	2.564	0.583	2.531	80.882	0.639	0.247	6.475	44.8666
1	WT	DMSO	375	3	16	channel1:WT_DMSO_T0016_00012_CH4	2.588	0.573	2.552	80.5	0.635	0.271	6.875	49.2261
1	WT	DMSO	400	3	17	channel1:WT_DMSO_T0017_00012_CH4	2.596	0.562	2.562	80.764	0.638	0.279	6.875	50.6793
1	WT	DMSO	425	3	18	channel1:WT_DMSO_T0018_00012_CH4	2.588	0.562	2.552	80.5	0.641	0.271	7	49.2261
1	WT	DMSO	450	3	19	channel1:WT_DMSO_T0019_00012_CH4	2.606	0.562	2.573	80.801	0.645	0.289	7.25	52.4957
1	WT	DMSO	475	3	20	channel1:WT_DMSO_T0020_00012_CH4	2.608	0.573	2.573	80.575	0.634	0.291	7.575	52.859
1	WT	DMSO	500	3	21	channel1:WT_DMSO_T0021_00012_CH4	2.632	0.552	2.594	80.202	0.634	0.315	7.9625	57.2185
1	WT	DMSO	525	3	22	channel1:WT_DMSO_T0022_00012_CH4	2.639	0.562	2.604	80.686	0.635	0.322	8.05	58.4901
1	WT	DMSO	550	3	23	channel1:WT_DMSO_T0023_00012_CH4	2.639	0.562	2.604	80.686	0.643	0.322	8.325	58.4901
1	WT	DMSO	575	3	24	channel1:WT_DMSO_T0024_00012_CH4	2.661	0.552	2.625	80.538	0.637	0.344	8.8375	62.4863
1	WT	DMSO	600	3	25	channel1:WT_DMSO_T0025_00012_CH4	2.68	0.552	2.646	80.831	0.642	0.363	9.2	65.9376
1	WT	DMSO	625	3	26	channel1:WT_DMSO_T0026_00012_CH4	2.69	0.552	2.656	80.866	0.638	0.373	9.05	67.754
1	WT	DMSO	650	3	27	channel1:WT_DMSO_T0027_00012_CH4	2.668	0.562	2.635	81.016	0.642	0.351	8.6625	63.7578
1	WT	DMSO	675	3	28	channel1:WT_DMSO_T0028_00012_CH4	2.659	0.552	2.635	82.346	0.641	0.342	9.05	62.123
1	WT	DMSO	700	3	29	channel1:WT_DMSO_T0029_00012_CH4	2.699	0.562	2.667	81.119	0.642	0.382	9.575	69.3888
1	WT	DMSO	725	3	30	channel1:WT_DMSO_T0030_00012_CH4	2.701	0.552	2.667	80.901	0.641	0.384	9.725	69.7521
1	WT	DMSO	750	3	31	channel1:WT_DMSO_T0031_00012_CH4	2.711	0.552	2.677	80.936	0.641	0.394	9.725	71.5686
1	WT	DMSO	775	3	32	channel1:WT_DMSO_T0032_00012_CH4	2.701	0.552	2.667	80.901	0.642	0.384	9.725	69.7521
1	WT	DMSO	800	3	33	channel1:WT_DMSO_T0033_00012_CH4	2.711	0.542	2.677	80.936	0.641	0.394	10.1125	71.5686
1	WT	DMSO	825	3	34	channel1:WT_DMSO_T0034_00012_CH4	2.732	0.552	2.698	81.005	0.642	0.415	10.5	75.3832
1	WT	DMSO	850	3	35	channel1:WT_DMSO_T0035_00012_CH4	2.742	0.552	2.708	81.039	0.642	0.425	10.725	77.1996
1	WT	DMSO	875	3	36	channel1:WT_DMSO_T0036_00012_CH4	2.75	0.562	2.719	81.287	0.639	0.433	10.775	78.6528
1	WT	DMSO	900	3	37	channel1:WT_DMSO_T0037_00012_CH4	2.746	0.552	2.719	81.931	0.639	0.429	10.9125	77.9262
1	WT	DMSO	925	3	38	channel1:WT_DMSO_T0038_00012_CH4	2.761	0.552	2.729	81.32	0.643	0.444	10.875	80.6509
1	WT	DMSO	950	3	39	channel1:WT_DMSO_T0039_00012_CH4	2.743	0.521	2.708	80.824	0.643	0.426	10.6375	77.3813
1	WT	DMSO	975	3	40	channel1:WT_DMSO_T0040_00012_CH4	2.742	0.542	2.708	81.039	0.641	0.425	10.5875	77.1996
1	WT	DMSO	1000	3	41	channel1:WT_DMSO_T0041_00012_CH4	2.739	0.562	2.708	81.469	0.645	0.422	10.675	76.6547
1	WT	DMSO	1025	3	42	channel1:WT_DMSO_T0042_00012_CH4	2.749	0.562	2.719	81.501	0.644	0.432	10.8375	78.4711
1	WT	DMSO	1050	3	43	channel1:WT_DMSO_T0043_00012_CH4	2.752	0.542	2.719	81.072	0.643	0.435	10.9875	79.0161
1	WT	DMSO	1075	3	44	channel1:WT_DMSO_T0044_00012_CH4	2.761	0.562	2.729	81.32	0.639	0.444	11.375	80.6509
1	WT	DMSO	1100	3	45	channel1:WT_DMSO_T0045_00012_CH4	2.783	0.542	2.75	81.172	0.642	0.466	11.775	84.6471
1	WT	DMSO	1125	3	46	channel1:WT_DMSO_T0046_00012_CH4	2.793	0.542	2.76	81.205	0.643	0.476	11.8875	86.4636
1	WT	DMSO	1150	3	47	channel1:WT_DMSO_T0047_00012_CH4	2.792	0.552	2.76	81.416	0.642	0.475	11.875	86.2819
1	WT	DMSO	1175	3	48	channel1:WT_DMSO_T0048_00012_CH4	2.792	0.552	2.76	81.416	0.642	0.475	12.1625	86.2819
1	WT	DMSO	1200	3	49	channel1:WT_DMSO_T0049_00012_CH4	2.815	0.531	2.781	81.06	0.642	0.498	12.45	90.4598
1	WT	DMSO	1225	3	50	channel1:WT_DMSO_T0050_00012_CH4	2.815	0.531	2.781	81.06	0.646	0.498	388.875	90.4598
1	WT	DMSO	0	4	51	channel1-1:WT_DMSO_T0001_00012_CH4	2.509	0.458	2.479	81.163	0.643	0	0.3875	0
1	WT	DMSO	25	4	52	channel1-1:WT_DMSO_T0002_00012_CH4	2.54	0.458	2.51	81.272	0.635	0.031	0.9	5.63103
1	WT	DMSO	50	4	53	channel1-1:WT_DMSO_T0003_00012_CH4	2.55	0.448	2.521	81.307	0.635	0.041	1.3875	7.44749
1	WT	DMSO	75	4	54	channel1-1:WT_DMSO_T0004_00012_CH4	2.579	0.448	2.552	81.641	0.644	0.07	2.1375	12.7152
1	WT	DMSO	100	4	55	channel1-1:WT_DMSO_T0005_00012_CH4	2.61	0.448	2.583	81.741	0.642	0.101	2.7	18.3463
1	WT	DMSO	125	4	56	channel1-1:WT_DMSO_T0006_00012_CH4	2.624	0.427	2.594	81.323	0.643	0.115	3.1125	20.8893
1	WT	DMSO	150	4	57	channel1-1:WT_DMSO_T0007_00012_CH4	2.643	0.427	2.615	81.614	0.635	0.134	3.6	24.3406
1	WT	DMSO	175	4	58	channel1-1:WT_DMSO_T0008_00012_CH4	2.663	0.427	2.635	81.68	0.634	0.154	4.35	27.9735
1	WT	DMSO	200	4	59	channel1-1:WT_DMSO_T0009_00012_CH4	2.703	0.417	2.677	82.026	0.638	0.194	4.65	35.2394
1	WT	DMSO	225	4	60	channel1-1:WT_DMSO_T0010_00012_CH4	2.687	0.406	2.656	81.304	0.642	0.178	4.5625	32.333
1	WT	DMSO	250	4	61	channel1-1:WT_DMSO_T0011_00012_CH4	2.696	0.406	2.667	81.557	0.641	0.187	5.175	33.9678
1	WT	DMSO	275	4	62	channel1-1:WT_DMSO_T0012_00012_CH4	2.736	0.406	2.708	81.901	0.637	0.227	5.475	41.2337
1	WT	DMSO	300	4	63	channel1-1:WT_DMSO_T0013_00012_CH4	2.72	0.385	2.688	81.187	0.637	0.211	5.5625	38.3273
1	WT	DMSO	325	4	64	channel1-1:WT_DMSO_T0014_00012_CH4	2.743	0.375	2.708	80.824	0.634	0.234	6.05	42.5052
1	WT	DMSO	350	4	65	channel1-1:WT_DMSO_T0015_00012_CH4	2.759	0.406	2.729	81.533	0.64	0.25	6.55	45.4115
1	WT	DMSO	375	4	66	channel1-1:WT_DMSO_T0016_00012_CH4	2.783	0.396	2.75	81.172	0.635	0.274	6.975	49.7711
1	WT	DMSO	400	4	67	channel1-1:WT_DMSO_T0017_00012_CH4	2.793	0.385	2.76	81.205	0.638	0.284	6.95	51.5875
1	WT	DMSO	425	4	68	channel1-1:WT_DMSO_T0018_00012_CH4	2.781	0.385	2.75	81.384	0.641	0.272	7.0625	49.4078
1	WT	DMSO	450	4	69	channel1-1:WT_DMSO_T0019_00012_CH4	2.802	0.385	2.771	81.448	0.645	0.293	7.35	53.2223
1	WT	DMSO	475	4	70	channel1-1:WT_DMSO_T0020_00012_CH4	2.804	0.396	2.771	81.238	0.634	0.295	7.65	53.5856
1	WT	DMSO	500	4	71	channel1-1:WT_DMSO_T0021_00012_CH4	2.826	0.375	2.792	81.093	0.634	0.317	8.025	57.5818
1	WT	DMSO	525	4	72	channel1-1:WT_DMSO_T0022_00012_CH4	2.834	0.385	2.802	81.334	0.635	0.325	8.1125	59.035
1	WT	DMSO	550	4	73	channel1-1:WT_DMSO_T0023_00012_CH4	2.833	0.385	2.802	81.542	0.647	0.324	8.375	58.8534
1	WT	DMSO	575	4	74	channel1-1:WT_DMSO_T0024_00012_CH4	2.855	0.375	2.823	81.397	0.637	0.346	8.9125	62.8496
1	WT	DMSO	600	4	75	channel1-1:WT_DMSO_T0025_00012_CH4	2.876	0.375	2.844	81.459	0.642	0.367	9.3	66.6641
1	WT	DMSO	625	4	76	channel1-1:WT_DMSO_T0026_00012_CH4	2.886	0.375	2.854	81.49	0.641	0.377	9.1625	68.4806
1	WT	DMSO	650	4	77	channel1-1:WT_DMSO_T0027_00012_CH4	2.865	0.385	2.833	81.428	0.642	0.356	8.925	64.666
1	WT	DMSO	675	4	78	channel1-1:WT_DMSO_T0028_00012_CH4	2.867	0.375	2.833	81.222	0.641	0.358	9.3	65.0293
1	WT	DMSO	700	4	79	channel1-1:WT_DMSO_T0029_00012_CH4	2.895	0.385	2.865	81.724	0.642	0.386	9.5875	70.1154
1	WT	DMSO	725	4	80	channel1-1:WT_DMSO_T0030_00012_CH4	2.89	0.375	2.865	82.337	0.641	0.381	9.6625	69.2072
1	WT	DMSO	750	4	81	channel1-1:WT_DMSO_T0031_00012_CH4	2.901	0.375	2.875	82.365	0.641	0.392	9.7625	71.2053
1	WT	DMSO	775	4	82	channel1-1:WT_DMSO_T0032_00012_CH4	2.898	0.375	2.865	81.316	0.642	0.389	9.875	70.6604
1	WT	DMSO	800	4	83	channel1-1:WT_DMSO_T0033_00012_CH4	2.91	0.365	2.875	81.145	0.641	0.401	10.2375	72.8401
1	WT	DMSO	825	4	84	channel1-1:WT_DMSO_T0034_00012_CH4	2.927	0.375	2.896	81.61	0.642	0.418	10.575	75.9281
1	WT	DMSO	850	4	85	channel1-1:WT_DMSO_T0035_00012_CH4	2.937	0.375	2.906	81.64	0.642	0.428	10.8125	77.7446
1	WT	DMSO	875	4	86	channel1-1:WT_DMSO_T0036_00012_CH4	2.946	0.385	2.917	81.87	0.639	0.437	10.95	79.3794
1	WT	DMSO	900	4	87	channel1-1:WT_DMSO_T0037_00012_CH4	2.948	0.375	2.917	81.669	0.639	0.439	11.0875	79.7427
1	WT	DMSO	925	4	88	channel1-1:WT_DMSO_T0038_00012_CH4	2.957	0.375	2.927	81.898	0.643	0.448	11	81.3775
1	WT	DMSO	950	4	89	channel1-1:WT_DMSO_T0039_00012_CH4	2.941	0.344	2.906	81.238	0.645	0.432	10.75	78.4711
1	WT	DMSO	975	4	90	channel1-1:WT_DMSO_T0040_00012_CH4	2.937	0.365	2.906	81.64	0.641	0.428	10.6125	77.7446
1	WT	DMSO	1000	4	91	channel1-1:WT_DMSO_T0041_00012_CH4	2.93	0.385	2.906	82.648	0.645	0.421	10.6625	76.473
1	WT	DMSO	1025	4	92	channel1-1:WT_DMSO_T0042_00012_CH4	2.941	0.385	2.917	82.674	0.644	0.432	10.825	78.4711
1	WT	DMSO	1050	4	93	channel1-1:WT_DMSO_T0043_00012_CH4	2.943	0.365	2.917	82.271	0.643	0.434	11	78.8344
1	WT	DMSO	1075	4	94	channel1-1:WT_DMSO_T0044_00012_CH4	2.955	0.385	2.927	82.098	0.639	0.446	11.425	81.0142
1	WT	DMSO	1100	4	95	channel1-1:WT_DMSO_T0045_00012_CH4	2.977	0.365	2.948	81.955	0.642	0.468	11.8	85.0104
1	WT	DMSO	1125	4	96	channel1-1:WT_DMSO_T0046_00012_CH4	2.985	0.365	2.958	82.379	0.643	0.476	11.9125	86.4636
1	WT	DMSO	1150	4	97	channel1-1:WT_DMSO_T0047_00012_CH4	2.986	0.375	2.958	82.181	0.642	0.477	11.95	86.6452
1	WT	DMSO	1175	4	98	channel1-1:WT_DMSO_T0048_00012_CH4	2.988	0.375	2.958	81.983	0.642	0.479	12.25	87.0085
1	WT	DMSO	1200	4	99	channel1-1:WT_DMSO_T0049_00012_CH4	3.01	0.354	2.979	81.842	0.642	0.501	12.5375	91.0047
1	WT	DMSO	1225	4	100	channel1-1:WT_DMSO_T0050_00012_CH4	3.011	0.354	2.979	81.646	0.646	0.502	391.975	91.1864
1	WT	DMSO	0	5	1	channel1:WT_DMSO_T0001_00013_CH4	3.456	0.583	0	104.664	1.283	0	0.4875	0
1	WT	DMSO	25	5	2	channel1:WT_DMSO_T0002_00013_CH4	3.495	0.552	0	105.03	1.284	0.039	1.575	7.0842
1	WT	DMSO	50	5	3	channel1:WT_DMSO_T0003_00013_CH4	3.543	0.531	0	105.344	1.278	0.087	2.425	15.8032
1	WT	DMSO	75	5	4	channel1:WT_DMSO_T0004_00013_CH4	3.563	0.531	0	105.255	1.282	0.107	2.9625	19.4361
1	WT	DMSO	100	5	5	channel1:WT_DMSO_T0005_00013_CH4	3.586	0.531	0	105.328	1.286	0.13	3.4	23.614
1	WT	DMSO	125	5	6	channel1:WT_DMSO_T0006_00013_CH4	3.598	0.604	0	104.076	1.275	0.142	4.15	25.7938
1	WT	DMSO	150	5	7	channel1:WT_DMSO_T0007_00013_CH4	3.646	0.542	0	105.068	1.275	0.19	4.7125	34.5128
1	WT	DMSO	175	5	8	channel1:WT_DMSO_T0008_00013_CH4	3.643	0.594	0	104.235	1.271	0.187	5.0625	33.9678
1	WT	DMSO	200	5	9	channel1:WT_DMSO_T0009_00013_CH4	3.674	0.552	0	104.785	1.255	0.218	5.2875	39.5989
1	WT	DMSO	225	5	10	channel1:WT_DMSO_T0010_00013_CH4	3.661	0.594	0	103.997	1.253	0.205	5.7	37.2375
1	WT	DMSO	250	5	11	channel1:WT_DMSO_T0011_00013_CH4	3.707	0.542	0	104.817	1.267	0.251	6.2375	45.5932
1	WT	DMSO	275	5	12	channel1:WT_DMSO_T0012_00013_CH4	3.704	0.594	0	103.997	1.257	0.248	6.7375	45.0482
1	WT	DMSO	300	5	13	channel1:WT_DMSO_T0013_00013_CH4	3.747	0.562	0	104.654	1.263	0.291	7.2375	52.859
1	WT	DMSO	325	5	14	channel1:WT_DMSO_T0014_00013_CH4	3.744	0.562	0	104.5	1.272	0.288	7.1125	52.3141
1	WT	DMSO	350	5	15	channel1:WT_DMSO_T0015_00013_CH4	3.737	0.583	0	104.036	1.26	0.281	7.175	51.0426
1	WT	DMSO	375	5	16	channel1:WT_DMSO_T0016_00013_CH4	3.749	0.604	0	103.496	1.269	0.293	7.5125	53.2223
1	WT	DMSO	400	5	17	channel1:WT_DMSO_T0017_00013_CH4	3.764	0.604	0	103.767	1.258	0.308	7.9625	55.947
1	WT	DMSO	425	5	18	channel1:WT_DMSO_T0018_00013_CH4	3.785	0.573	0	104.342	1.263	0.329	8.375	59.7616
1	WT	DMSO	450	5	19	channel1:WT_DMSO_T0019_00013_CH4	3.797	0.562	0	104.456	1.245	0.341	8.775	61.9413
1	WT	DMSO	475	5	20	channel1:WT_DMSO_T0020_00013_CH4	3.817	0.573	0	104.378	1.248	0.361	9.375	65.5743
1	WT	DMSO	500	5	21	channel1:WT_DMSO_T0021_00013_CH4	3.845	0.583	0	104.112	1.251	0.389	9.7	70.6604
1	WT	DMSO	525	5	22	channel1:WT_DMSO_T0022_00013_CH4	3.843	0.562	0	104.601	1.249	0.387	9.6375	70.2971
1	WT	DMSO	550	5	23	channel1:WT_DMSO_T0023_00013_CH4	3.84	0.573	0	104.451	1.238	0.384	9.6625	69.7521
1	WT	DMSO	575	5	24	channel1:WT_DMSO_T0024_00013_CH4	3.845	0.594	0	104.112	1.259	0.389	9.6375	70.6604
1	WT	DMSO	600	5	25	channel1:WT_DMSO_T0025_00013_CH4	3.838	0.594	0	104.3	1.269	0.382	9.8875	69.3888
1	WT	DMSO	625	5	26	channel1:WT_DMSO_T0026_00013_CH4	3.865	0.604	0	104.036	1.238	0.409	10.225	74.2933
1	WT	DMSO	650	5	27	channel1:WT_DMSO_T0027_00013_CH4	3.865	0.604	0	104.036	1.23	0.409	10.225	74.2933
1	WT	DMSO	675	5	28	channel1:WT_DMSO_T0028_00013_CH4	3.865	0.604	0	104.036	1.243	0.409	10.0375	74.2933
1	WT	DMSO	700	5	29	channel1:WT_DMSO_T0029_00013_CH4	3.85	0.594	0	104.412	1.257	0.394	9.95	71.5686
1	WT	DMSO	725	5	30	channel1:WT_DMSO_T0030_00013_CH4	3.858	0.604	0	104.224	1.256	0.402	10.275	73.0218
1	WT	DMSO	750	5	31	channel1:WT_DMSO_T0031_00013_CH4	3.876	0.604	0	103.999	1.251	0.42	10.525	76.2914
1	WT	DMSO	775	5	32	channel1:WT_DMSO_T0032_00013_CH4	3.878	0.604	0	104.148	1.259	0.422	10.7375	76.6547
1	WT	DMSO	800	5	33	channel1:WT_DMSO_T0033_00013_CH4	3.893	0.604	0	103.776	1.259	0.437	11.05	79.3794
1	WT	DMSO	825	5	34	channel1:WT_DMSO_T0034_00013_CH4	3.903	0.615	0	103.74	1.248	0.447	11.3	81.1958
1	WT	DMSO	850	5	35	channel1:WT_DMSO_T0035_00013_CH4	3.913	0.615	0	103.703	1.236	0.457	11.3625	83.0123
1	WT	DMSO	875	5	36	channel1:WT_DMSO_T0036_00013_CH4	3.908	0.604	0	104.036	1.237	0.452	11.65	82.1041
1	WT	DMSO	900	5	37	channel1:WT_DMSO_T0037_00013_CH4	3.936	0.604	0	103.779	1.243	0.48	12.0375	87.1902
1	WT	DMSO	925	5	38	channel1:WT_DMSO_T0038_00013_CH4	3.939	0.604	0	103.926	1.25	0.483	12.2	87.7351
1	WT	DMSO	950	5	39	channel1:WT_DMSO_T0039_00013_CH4	3.949	0.604	0	103.89	1.238	0.493	12.2875	89.5516
1	WT	DMSO	975	5	40	channel1:WT_DMSO_T0040_00013_CH4	3.946	0.604	0	103.743	1.233	0.49	12.4125	89.0066
1	WT	DMSO	1000	5	41	channel1:WT_DMSO_T0041_00013_CH4	3.959	0.604	0	103.853	1.238	0.503	12.3875	91.368
1	WT	DMSO	1025	5	42	channel1:WT_DMSO_T0042_00013_CH4	3.944	0.615	0	103.596	1.235	0.488	12.35	88.6433
1	WT	DMSO	1050	5	43	channel1:WT_DMSO_T0043_00013_CH4	3.956	0.625	0	103.707	1.237	0.5	12.6625	90.8231
1	WT	DMSO	1075	5	44	channel1:WT_DMSO_T0044_00013_CH4	3.969	0.604	0	103.817	1.236	0.513	12.8625	93.1845
1	WT	DMSO	1100	5	45	channel1:WT_DMSO_T0045_00013_CH4	3.972	0.604	0	103.963	1.242	0.516	12.6375	93.7294
1	WT	DMSO	1125	5	46	channel1:WT_DMSO_T0046_00013_CH4	3.951	0.615	0.01	104.036	1.234	0.495	12.5125	89.9149
1	WT	DMSO	1150	5	47	channel1:WT_DMSO_T0047_00013_CH4	3.962	0.615	0.01	103.379	1.221	0.506	12.9	91.913
1	WT	DMSO	1175	5	48	channel1:WT_DMSO_T0048_00013_CH4	3.982	0.615	0.01	103.927	1.238	0.526	13.2375	95.5459
1	WT	DMSO	1200	5	49	channel1:WT_DMSO_T0049_00013_CH4	3.989	0.594	0	104.363	1.246	0.533	13.2	96.8174
1	WT	DMSO	1225	5	50	channel1:WT_DMSO_T0050_00013_CH4	3.979	0.594	0.01	104.4	1.243	0.523	441.813	95.0009
1	WT	DMSO	0	6	1	channel1:WT_DMSO_T0001_00004_CH4	1.733	0.073	1.719	82.747	0.281	0	0.3625	0
1	WT	DMSO	25	6	2	channel1:WT_DMSO_T0002_00004_CH4	1.762	0.083	1.75	83.211	0.292	0.029	1	5.26774
1	WT	DMSO	50	6	3	channel1:WT_DMSO_T0003_00004_CH4	1.784	0.073	1.771	82.958	0.292	0.051	1.5125	9.26395
1	WT	DMSO	75	6	4	channel1:WT_DMSO_T0004_00004_CH4	1.803	0.083	1.792	83.696	0.292	0.07	1.975	12.7152
1	WT	DMSO	100	6	5	channel1:WT_DMSO_T0005_00004_CH4	1.821	0.115	1.812	84.42	0.292	0.088	2.3625	15.9849
1	WT	DMSO	125	6	6	channel1:WT_DMSO_T0006_00004_CH4	1.834	0.083	1.823	83.804	0.302	0.101	2.7625	18.3463
1	WT	DMSO	150	6	7	channel1:WT_DMSO_T0007_00004_CH4	1.853	0.094	1.844	84.193	0.302	0.12	3.25	21.7975
1	WT	DMSO	175	6	8	channel1:WT_DMSO_T0008_00004_CH4	1.873	0.104	1.865	84.575	0.302	0.14	3.625	25.4305
1	WT	DMSO	200	6	9	channel1:WT_DMSO_T0009_00004_CH4	1.883	0.104	1.875	84.605	0.302	0.15	3.9125	27.2469
1	WT	DMSO	225	6	10	channel1:WT_DMSO_T0010_00004_CH4	1.896	0.083	1.885	84.007	0.302	0.163	4.175	29.6083
1	WT	DMSO	250	6	11	channel1:WT_DMSO_T0011_00004_CH4	1.904	0.094	1.896	84.664	0.312	0.171	4.4	31.0615
1	WT	DMSO	275	6	12	channel1:WT_DMSO_T0012_00004_CH4	1.914	0.094	1.906	84.693	0.312	0.181	4.525	32.878
1	WT	DMSO	300	6	13	channel1:WT_DMSO_T0013_00004_CH4	1.914	0.021	0	94.997	0.312	0.181	4.6375	32.878
1	WT	DMSO	325	6	14	channel1:WT_DMSO_T0014_00004_CH4	1.923	0.021	0	94.661	0.312	0.19	4.8875	34.5128
1	WT	DMSO	350	6	15	channel1:WT_DMSO_T0015_00004_CH4	1.934	0.104	1.927	85.057	0.312	0.201	5.275	36.5109
1	WT	DMSO	375	6	16	channel1:WT_DMSO_T0016_00004_CH4	1.954	0.104	1.948	85.414	0.312	0.221	5.525	40.1438
1	WT	DMSO	400	6	17	channel1:WT_DMSO_T0017_00004_CH4	1.954	0.104	1.948	85.414	0.323	0.221	5.55	40.1438
1	WT	DMSO	425	6	18	channel1:WT_DMSO_T0018_00004_CH4	1.956	0.021	0	95.194	0.323	0.223	5.7	40.5071
1	WT	DMSO	450	6	19	channel1:WT_DMSO_T0019_00004_CH4	1.966	0.021	0	95.167	0.323	0.233	5.9875	42.3236
1	WT	DMSO	475	6	20	channel1:WT_DMSO_T0020_00004_CH4	1.979	0.021	0	95.741	0.323	0.246	6.225	44.685
1	WT	DMSO	500	6	21	channel1:WT_DMSO_T0021_00004_CH4	1.985	0.115	1.979	85.786	0.323	0.252	6.0875	45.7748
1	WT	DMSO	525	6	22	channel1:WT_DMSO_T0022_00004_CH4	1.968	0.021	0	95.771	0.323	0.235	6.1375	42.6868
1	WT	DMSO	550	6	23	channel1:WT_DMSO_T0023_00004_CH4	1.989	0.021	0	95.711	0.323	0.256	6.5	46.5014
1	WT	DMSO	575	6	24	channel1:WT_DMSO_T0024_00004_CH4	1.997	0.021	0	94.788	0.333	0.264	6.8875	47.9546
1	WT	DMSO	600	6	25	channel1:WT_DMSO_T0025_00004_CH4	2.02	0.021	0	95.622	0.333	0.287	7.1625	52.1325
1	WT	DMSO	625	6	26	channel1:WT_DMSO_T0026_00004_CH4	2.019	0.021	0	95.328	0.333	0.286	7.175	51.9508
1	WT	DMSO	650	6	27	channel1:WT_DMSO_T0027_00004_CH4	2.021	0.021	0	95.916	0.333	0.288	7.325	52.3141
1	WT	DMSO	675	6	28	channel1:WT_DMSO_T0028_00004_CH4	2.031	0.021	0	95.594	0.333	0.298	7.2875	54.1306
1	WT	DMSO	700	6	29	channel1:WT_DMSO_T0029_00004_CH4	2.018	0.021	0	95.034	0.333	0.285	7.4125	51.7692
1	WT	DMSO	725	6	30	channel1:WT_DMSO_T0030_00004_CH4	2.041	0.021	0	95.565	0.333	0.308	7.6	55.947
1	WT	DMSO	750	6	31	channel1:WT_DMSO_T0031_00004_CH4	2.033	0.021	0	96.178	0.333	0.3	7.4375	54.4939
1	WT	DMSO	775	6	32	channel1:WT_DMSO_T0032_00004_CH4	2.028	0.021	0	94.715	0.333	0.295	7.5375	53.5856
1	WT	DMSO	800	6	33	channel1:WT_DMSO_T0033_00004_CH4	2.041	0.021	0	95.565	0.333	0.308	7.95	55.947
1	WT	DMSO	825	6	34	channel1:WT_DMSO_T0034_00004_CH4	2.061	0.021	0	95.221	0.344	0.328	8.225	59.5799
1	WT	DMSO	850	6	35	channel1:WT_DMSO_T0035_00004_CH4	2.063	0.021	0	95.797	0.344	0.33	8.225	59.9432
1	WT	DMSO	875	6	36	channel1:WT_DMSO_T0036_00004_CH4	2.061	0.021	0	95.221	0.344	0.328	8.2125	59.5799
1	WT	DMSO	900	6	37	channel1:WT_DMSO_T0037_00004_CH4	2.062	0.021	0	95.509	0.344	0.329	8.3375	59.7616
1	WT	DMSO	925	6	38	channel1:WT_DMSO_T0038_00004_CH4	2.071	0.021	0	95.194	0.344	0.338	8.575	61.3964
1	WT	DMSO	950	6	39	channel1:WT_DMSO_T0039_00004_CH4	2.081	0.021	0	95.168	0.344	0.348	8.7125	63.2129
1	WT	DMSO	975	6	40	channel1:WT_DMSO_T0040_00004_CH4	2.082	0.021	0	95.454	0.344	0.349	8.8625	63.3945
1	WT	DMSO	1000	6	41	channel1:WT_DMSO_T0041_00004_CH4	2.093	0.021	0	95.427	0.344	0.36	9.125	65.3926
1	WT	DMSO	1025	6	42	channel1:WT_DMSO_T0042_00004_CH4	2.103	0.021	0	95.4	0.344	0.37	9.25	67.2091
1	WT	DMSO	1050	6	43	channel1:WT_DMSO_T0043_00004_CH4	2.103	0.021	0	95.4	0.344	0.37	9.375	67.2091
1	WT	DMSO	1075	6	44	channel1:WT_DMSO_T0044_00004_CH4	2.113	0.021	0	95.373	0.344	0.38	9.6125	69.0255
1	WT	DMSO	1100	6	45	channel1:WT_DMSO_T0045_00004_CH4	2.122	0.021	0	94.787	0.354	0.389	9.725	70.6604
1	WT	DMSO	1125	6	46	channel1:WT_DMSO_T0046_00004_CH4	2.122	0.021	0	94.787	0.354	0.389	9.925	70.6604
1	WT	DMSO	1150	6	47	channel1:WT_DMSO_T0047_00004_CH4	2.138	0.021	0	96.433	0.354	0.405	10.125	73.5667
1	WT	DMSO	1175	6	48	channel1:WT_DMSO_T0048_00004_CH4	2.138	0.021	0	96.433	0.354	0.405	10.2375	73.5667
1	WT	DMSO	1200	6	49	channel1:WT_DMSO_T0049_00004_CH4	2.147	0.021	0	95.849	0.354	0.414	10.3125	75.2015
1	WT	DMSO	1225	6	50	channel1:WT_DMSO_T0050_00004_CH4	2.144	0.021	0	95.018	0.354	0.411	316.987	74.6566
1	WT	DMSO	0	7	1	channel1:WT_DMSO_T0001_00007_CH4	3.587	0.427	0	95.164	1.282	0	0.3875	0
1	WT	DMSO	25	7	2	channel1:WT_DMSO_T0002_00007_CH4	3.618	0.438	0	94.955	1.264	0.031	1.0375	5.63103
1	WT	DMSO	50	7	3	channel1:WT_DMSO_T0003_00007_CH4	3.639	0.438	0	95.09	1.248	0.052	1.5875	9.4456
1	WT	DMSO	75	7	4	channel1:WT_DMSO_T0004_00007_CH4	3.662	0.438	0	95.386	1.227	0.075	2.375	13.6235
1	WT	DMSO	100	7	5	channel1:WT_DMSO_T0005_00007_CH4	3.702	0.417	0	95.005	1.215	0.115	3.1625	20.8893
1	WT	DMSO	125	7	6	channel1:WT_DMSO_T0006_00007_CH4	3.725	0.417	0	95.456	1.198	0.138	3.6875	25.0672
1	WT	DMSO	150	7	7	channel1:WT_DMSO_T0007_00007_CH4	3.744	0.438	0	95.108	1.162	0.157	4.075	28.5184
1	WT	DMSO	175	7	8	channel1:WT_DMSO_T0008_00007_CH4	3.756	0.427	0	95.41	1.139	0.169	4.5375	30.6982
1	WT	DMSO	200	7	9	channel1:WT_DMSO_T0009_00007_CH4	3.781	0.385	0	96.009	1.12	0.194	5.2125	35.2394
1	WT	DMSO	225	7	10	channel1:WT_DMSO_T0010_00007_CH4	3.81	0.385	0	95.648	1.099	0.223	5.7125	40.5071
1	WT	DMSO	250	7	11	channel1:WT_DMSO_T0011_00007_CH4	3.821	0.375	0	95.633	1.059	0.234	5.9875	42.5052
1	WT	DMSO	275	7	12	channel1:WT_DMSO_T0012_00007_CH4	3.832	0.375	0	95.773	1.043	0.245	6.1375	44.5033
1	WT	DMSO	300	7	13	channel1:WT_DMSO_T0013_00007_CH4	3.833	0.375	0	95.928	1.037	0.246	6.5125	44.685
1	WT	DMSO	325	7	14	channel1:WT_DMSO_T0014_00007_CH4	3.862	0.375	0	95.572	0.979	0.275	6.925	49.9527
1	WT	DMSO	350	7	15	channel1:WT_DMSO_T0015_00007_CH4	3.866	0.375	0	96.187	0.979	0.279	7.1875	50.6793
1	WT	DMSO	375	7	16	channel1:WT_DMSO_T0016_00007_CH4	3.883	0.375	0	95.542	0.979	0.296	7.4625	53.7673
1	WT	DMSO	400	7	17	channel1:WT_DMSO_T0017_00007_CH4	3.888	0.365	0	96.306	0.979	0.301	7.75	54.6755
1	WT	DMSO	425	7	18	channel1:WT_DMSO_T0018_00007_CH4	3.906	0.365	0	95.817	0.979	0.319	8.1	57.9451
1	WT	DMSO	450	7	19	channel1:WT_DMSO_T0019_00007_CH4	3.916	0.365	0	95.802	0.969	0.329	8.2375	59.7616
1	WT	DMSO	475	7	20	channel1:WT_DMSO_T0020_00007_CH4	3.917	0.365	0	95.953	0.948	0.33	8.2375	59.9432
1	WT	DMSO	500	7	21	channel1:WT_DMSO_T0021_00007_CH4	3.916	0.354	0	95.802	0.917	0.329	8.5	59.7616
1	WT	DMSO	525	7	22	channel1:WT_DMSO_T0022_00007_CH4	3.938	0.354	0	95.922	0.875	0.351	8.925	63.7578
1	WT	DMSO	550	7	23	channel1:WT_DMSO_T0023_00007_CH4	3.95	0.354	0	96.207	0.844	0.363	8.925	65.9376
1	WT	DMSO	575	7	24	channel1:WT_DMSO_T0024_00007_CH4	3.938	0.344	0	95.922	0.812	0.351	8.9375	63.7578
1	WT	DMSO	600	7	25	channel1:WT_DMSO_T0025_00007_CH4	3.951	0.344	0	96.357	0.802	0.364	9.375	66.1192
1	WT	DMSO	625	7	26	channel1:WT_DMSO_T0026_00007_CH4	3.973	0.344	0	96.473	0.74	0.386	9.625	70.1154
1	WT	DMSO	650	7	27	channel1:WT_DMSO_T0027_00007_CH4	3.971	0.344	0	96.174	0.708	0.384	9.6125	69.7521
1	WT	DMSO	675	7	28	channel1:WT_DMSO_T0028_00007_CH4	3.972	0.344	0	96.324	0.688	0.385	9.75	69.9338
1	WT	DMSO	700	7	29	channel1:WT_DMSO_T0029_00007_CH4	3.982	0.344	0	96.307	0.675	0.395	9.75	71.7502
1	WT	DMSO	725	7	30	channel1:WT_DMSO_T0030_00007_CH4	3.972	0.344	0	96.324	0.676	0.385	9.8875	69.9338
1	WT	DMSO	750	7	31	channel1:WT_DMSO_T0031_00007_CH4	3.993	0.344	0	96.291	0.676	0.406	10.425	73.7483
1	WT	DMSO	775	7	32	channel1:WT_DMSO_T0032_00007_CH4	4.015	0.344	0	96.406	0.678	0.428	10.55	77.7446
1	WT	DMSO	800	7	33	channel1:WT_DMSO_T0033_00007_CH4	4.003	0.344	0	96.274	0.677	0.416	10.675	75.5648
1	WT	DMSO	825	7	34	channel1:WT_DMSO_T0034_00007_CH4	4.025	0.344	0	96.389	0.677	0.438	10.95	79.561
1	WT	DMSO	850	7	35	channel1:WT_DMSO_T0035_00007_CH4	4.025	0.344	0	96.389	0.677	0.438	11.2125	79.561
1	WT	DMSO	875	7	36	channel1:WT_DMSO_T0036_00007_CH4	4.046	0.344	0	96.356	0.676	0.459	11.65	83.3756
1	WT	DMSO	900	7	37	channel1:WT_DMSO_T0037_00007_CH4	4.06	0.333	0	96.779	0.679	0.473	11.95	85.9186
1	WT	DMSO	925	7	38	channel1:WT_DMSO_T0038_00007_CH4	4.07	0.333	0	96.761	0.679	0.483	12.05	87.7351
1	WT	DMSO	950	7	39	channel1:WT_DMSO_T0039_00007_CH4	4.068	0.344	0	96.47	0.68	0.481	12.1375	87.3718
1	WT	DMSO	975	7	40	channel1:WT_DMSO_T0040_00007_CH4	4.077	0.354	0	96.308	0.679	0.49	12.225	89.0066
1	WT	DMSO	1000	7	41	channel1:WT_DMSO_T0041_00007_CH4	4.075	0.354	0	96.017	0.679	0.488	12.475	88.6433
1	WT	DMSO	1025	7	42	channel1:WT_DMSO_T0042_00007_CH4	4.097	0.354	0	96.276	0.68	0.51	12.65	92.6395
1	WT	DMSO	1050	7	43	channel1:WT_DMSO_T0043_00007_CH4	4.089	0.344	0	96.582	0.679	0.502	12.7625	91.1864
1	WT	DMSO	1075	7	44	channel1:WT_DMSO_T0044_00007_CH4	4.106	0.365	0	95.971	0.677	0.519	13.075	94.2744
1	WT	DMSO	1100	7	45	channel1:WT_DMSO_T0045_00007_CH4	4.114	0.365	0	95.667	0.676	0.527	13.25	95.7275
1	WT	DMSO	1125	7	46	channel1:WT_DMSO_T0046_00007_CH4	4.12	0.344	0	96.532	0.678	0.533	13.4625	96.8174
1	WT	DMSO	1150	7	47	channel1:WT_DMSO_T0047_00007_CH4	4.131	0.344	0	96.516	0.678	0.544	13.7375	98.8155
1	WT	DMSO	1175	7	48	channel1:WT_DMSO_T0048_00007_CH4	4.142	0.344	0	96.642	0.676	0.555	14	100.814
1	WT	DMSO	1200	7	49	channel1:WT_DMSO_T0049_00007_CH4	4.152	0.333	0	96.483	0.677	0.565	14.225	102.63
1	WT	DMSO	1225	7	50	channel1:WT_DMSO_T0050_00007_CH4	4.16	0.344	0	96.182	0.677	0.573	431.062	104.083
1	WT	DMSO	0	8	1	channel1:WT_DMSO_T0001_00008_CH4	3.028	0.24	2.969	78.69	0.892	0	0.275	0
1	WT	DMSO	25	8	2	channel1:WT_DMSO_T0002_00008_CH4	3.05	0.24	2.99	78.575	0.894	0.022	0.6	3.99622
1	WT	DMSO	50	8	3	channel1:WT_DMSO_T0003_00008_CH4	3.054	0.26	3	79.188	0.893	0.026	0.9125	4.7228
1	WT	DMSO	75	8	4	channel1:WT_DMSO_T0004_00008_CH4	3.075	0.271	3.021	79.261	0.895	0.047	1.425	8.53737
1	WT	DMSO	100	8	5	channel1:WT_DMSO_T0005_00008_CH4	3.095	0.271	3.042	79.333	0.896	0.067	1.9375	12.1703
1	WT	DMSO	125	8	6	channel1:WT_DMSO_T0006_00008_CH4	3.116	0.271	3.062	79.404	0.896	0.088	2.35	15.9849
1	WT	DMSO	150	8	7	channel1:WT_DMSO_T0007_00008_CH4	3.128	0.26	3.073	79.251	0.896	0.1	2.65	18.1646
1	WT	DMSO	175	8	8	channel1:WT_DMSO_T0008_00008_CH4	3.14	0.25	3.083	79.1	0.896	0.112	2.9	20.3444
1	WT	DMSO	200	8	9	channel1:WT_DMSO_T0009_00008_CH4	3.148	0.26	3.094	79.322	0.896	0.12	3.0625	21.7975
1	WT	DMSO	225	8	10	channel1:WT_DMSO_T0010_00008_CH4	3.153	0.292	3.104	79.915	0.896	0.125	3.275	22.7058
1	WT	DMSO	250	8	11	channel1:WT_DMSO_T0011_00008_CH4	3.165	0.281	3.115	79.763	0.896	0.137	3.55	24.8855
1	WT	DMSO	275	8	12	channel1:WT_DMSO_T0012_00008_CH4	3.175	0.271	3.125	79.796	0.896	0.147	3.9375	26.702
1	WT	DMSO	300	8	13	channel1:WT_DMSO_T0013_00008_CH4	3.196	0.26	3.146	79.862	0.896	0.168	4.3	30.5166
1	WT	DMSO	325	8	14	channel1:WT_DMSO_T0014_00008_CH4	3.204	0.271	3.156	80.078	0.896	0.176	4.55	31.9697
1	WT	DMSO	350	8	15	channel1:WT_DMSO_T0015_00008_CH4	3.216	0.281	3.167	79.928	0.896	0.188	4.7875	34.1495
1	WT	DMSO	375	8	16	channel1:WT_DMSO_T0016_00008_CH4	3.223	0.292	3.177	80.325	0.896	0.195	4.9375	35.421
1	WT	DMSO	400	8	17	channel1:WT_DMSO_T0017_00008_CH4	3.228	0.26	3.177	79.778	0.896	0.2	5.0625	36.3292
1	WT	DMSO	425	8	18	channel1:WT_DMSO_T0018_00008_CH4	3.233	0.281	3.188	80.356	0.896	0.205	5.275	37.2375
1	WT	DMSO	450	8	19	channel1:WT_DMSO_T0019_00008_CH4	3.245	0.281	3.198	80.205	0.895	0.217	5.55	39.4172
1	WT	DMSO	475	8	20	channel1:WT_DMSO_T0020_00008_CH4	3.255	0.281	3.208	80.236	0.895	0.227	5.9625	41.2337
1	WT	DMSO	500	8	21	channel1:WT_DMSO_T0021_00008_CH4	3.278	0.333	3.24	81.226	0.894	0.25	6.125	45.4115
1	WT	DMSO	525	8	22	channel1:WT_DMSO_T0022_00008_CH4	3.268	0.333	3.229	81.198	0.894	0.24	5.925	43.5951
1	WT	DMSO	550	8	23	channel1:WT_DMSO_T0023_00008_CH4	3.262	0.271	3.219	80.628	0.894	0.234	6.15	42.5052
1	WT	DMSO	575	8	24	channel1:WT_DMSO_T0024_00008_CH4	3.286	0.271	3.24	80.329	0.893	0.258	6.4375	46.8647
1	WT	DMSO	600	8	25	channel1:WT_DMSO_T0025_00008_CH4	3.285	0.281	3.24	80.508	0.885	0.257	6.5	46.6831
1	WT	DMSO	625	8	26	channel1:WT_DMSO_T0026_00008_CH4	3.291	0.302	3.25	80.895	0.893	0.263	6.75	47.7729
1	WT	DMSO	650	8	27	channel1:WT_DMSO_T0027_00008_CH4	3.305	0.281	3.26	80.567	0.885	0.277	6.8875	50.316
1	WT	DMSO	675	8	28	channel1:WT_DMSO_T0028_00008_CH4	3.302	0.302	3.26	80.924	0.885	0.274	6.9125	49.7711
1	WT	DMSO	700	8	29	channel1:WT_DMSO_T0029_00008_CH4	3.307	0.271	3.26	80.389	0.885	0.279	7.075	50.6793
1	WT	DMSO	725	8	30	channel1:WT_DMSO_T0030_00008_CH4	3.315	0.281	3.271	80.597	0.885	0.287	7.375	52.1325
1	WT	DMSO	750	8	31	channel1:WT_DMSO_T0031_00008_CH4	3.331	0.312	3.292	81.186	0.885	0.303	7.5125	55.0388
1	WT	DMSO	775	8	32	channel1:WT_DMSO_T0032_00008_CH4	3.326	0.281	3.281	80.626	0.885	0.298	7.3875	54.1306
1	WT	DMSO	800	8	33	channel1:WT_DMSO_T0033_00008_CH4	3.321	0.302	3.281	81.158	0.885	0.293	7.6875	53.2223
1	WT	DMSO	825	8	34	channel1:WT_DMSO_T0034_00008_CH4	3.35	0.323	3.312	81.416	0.885	0.322	8.05	58.4901
1	WT	DMSO	850	8	35	channel1:WT_DMSO_T0035_00008_CH4	3.35	0.271	3.302	80.333	0.885	0.322	8.2125	58.4901
1	WT	DMSO	875	8	36	channel1:WT_DMSO_T0036_00008_CH4	3.363	0.312	3.323	81.092	0.885	0.335	8.425	60.8515
1	WT	DMSO	900	8	37	channel1:WT_DMSO_T0037_00008_CH4	3.367	0.281	3.323	80.742	0.885	0.339	8.6	61.5781
1	WT	DMSO	925	8	38	channel1:WT_DMSO_T0038_00008_CH4	3.377	0.281	3.333	80.77	0.885	0.349	9	63.3945
1	WT	DMSO	950	8	39	channel1:WT_DMSO_T0039_00008_CH4	3.399	0.281	3.354	80.653	0.885	0.371	9.2625	67.3907
1	WT	DMSO	975	8	40	channel1:WT_DMSO_T0040_00008_CH4	3.398	0.281	3.354	80.826	0.885	0.37	9.1875	67.2091
1	WT	DMSO	1000	8	41	channel1:WT_DMSO_T0041_00008_CH4	3.393	0.302	3.354	81.347	0.885	0.365	9.3375	66.3009
1	WT	DMSO	1025	8	42	channel1:WT_DMSO_T0042_00008_CH4	3.41	0.323	3.375	81.746	0.885	0.382	9.6375	69.3888
1	WT	DMSO	1050	8	43	channel1:WT_DMSO_T0043_00008_CH4	3.417	0.281	3.375	81.055	0.885	0.389	9.675	70.6604
1	WT	DMSO	1075	8	44	channel1:WT_DMSO_T0044_00008_CH4	3.413	0.302	3.375	81.4	0.884	0.385	9.8125	69.9338
1	WT	DMSO	1100	8	45	channel1:WT_DMSO_T0045_00008_CH4	3.428	0.271	3.385	80.91	0.884	0.4	9.9625	72.6585
1	WT	DMSO	1125	8	46	channel1:WT_DMSO_T0046_00008_CH4	3.425	0.292	3.385	81.254	0.885	0.397	10.1125	72.1135
1	WT	DMSO	1150	8	47	channel1:WT_DMSO_T0047_00008_CH4	3.44	0.271	3.396	80.766	0.885	0.412	10.3875	74.8382
1	WT	DMSO	1175	8	48	channel1:WT_DMSO_T0048_00008_CH4	3.447	0.281	3.406	81.135	0.875	0.419	10.65	76.1097
1	WT	DMSO	1200	8	49	channel1:WT_DMSO_T0049_00008_CH4	3.461	0.271	3.417	80.821	0.884	0.433	11.025	78.6528
1	WT	DMSO	1225	8	50	channel1:WT_DMSO_T0050_00008_CH4	3.477	0.302	3.438	81.384	0.882	0.449	307.362	81.5591
1	WT	DMSO	0	9	1	channel1:WT_DMSO_T0001_00009_CH4	3.052	1	2.99	78.383	0.802	0	0.3375	0
1	WT	DMSO	25	9	2	channel1:WT_DMSO_T0002_00009_CH4	3.079	1.01	3.021	78.88	0.8	0.027	0.85	4.90445
1	WT	DMSO	50	9	3	channel1:WT_DMSO_T0003_00009_CH4	3.093	1.042	3.042	79.523	0.788	0.041	1.2625	7.44749
1	WT	DMSO	75	9	4	channel1:WT_DMSO_T0004_00009_CH4	3.112	1.042	3.062	79.781	0.771	0.06	1.65	10.8988
1	WT	DMSO	100	9	5	channel1:WT_DMSO_T0005_00009_CH4	3.124	1.031	3.073	79.627	0.769	0.072	1.925	13.0785
1	WT	DMSO	125	9	6	channel1:WT_DMSO_T0006_00009_CH4	3.134	1.031	3.083	79.661	0.772	0.082	2.375	14.895
1	WT	DMSO	150	9	7	channel1:WT_DMSO_T0007_00009_CH4	3.16	1.062	3.115	80.32	0.77	0.108	2.8	19.6178
1	WT	DMSO	175	9	8	channel1:WT_DMSO_T0008_00009_CH4	3.168	1.062	3.125	80.538	0.762	0.116	3.1125	21.071
1	WT	DMSO	200	9	9	channel1:WT_DMSO_T0009_00009_CH4	3.185	1.073	3.146	80.969	0.754	0.133	3.525	24.1589
1	WT	DMSO	225	9	10	channel1:WT_DMSO_T0010_00009_CH4	3.201	1.031	3.156	80.446	0.731	0.149	3.7125	27.0653
1	WT	DMSO	250	9	11	channel1:WT_DMSO_T0011_00009_CH4	3.2	1.083	3.167	81.764	0.714	0.148	3.8875	26.8836
1	WT	DMSO	275	9	12	channel1:WT_DMSO_T0012_00009_CH4	3.215	1.042	3.177	81.24	0.709	0.163	4.2125	29.6083
1	WT	DMSO	300	9	13	channel1:WT_DMSO_T0013_00009_CH4	3.226	1.083	3.198	82.393	0.688	0.174	4.35	31.6064
1	WT	DMSO	325	9	14	channel1:WT_DMSO_T0014_00009_CH4	3.226	1.073	3.198	82.393	0.677	0.174	4.55	31.6064
1	WT	DMSO	350	9	15	channel1:WT_DMSO_T0015_00009_CH4	3.242	1.094	3.219	83.172	0.674	0.19	4.8	34.5128
1	WT	DMSO	375	9	16	channel1:WT_DMSO_T0016_00009_CH4	3.246	1.062	3.219	82.624	0.678	0.194	4.925	35.2394
1	WT	DMSO	400	9	17	channel1:WT_DMSO_T0017_00009_CH4	3.252	1.073	3.229	83.194	0.679	0.2	5.1875	36.3292
1	WT	DMSO	425	9	18	channel1:WT_DMSO_T0018_00009_CH4	3.267	1.104	3.25	84.144	0.678	0.215	5.5125	39.0539
1	WT	DMSO	450	9	19	channel1:WT_DMSO_T0019_00009_CH4	3.278	1.094	3.26	83.981	0.676	0.226	5.7875	41.052
1	WT	DMSO	475	9	20	channel1:WT_DMSO_T0020_00009_CH4	3.289	1.083	3.271	84	0.674	0.237	5.7875	43.0501
1	WT	DMSO	500	9	21	channel1:WT_DMSO_T0021_00009_CH4	3.278	1.073	3.26	83.981	0.671	0.226	5.775	41.052
1	WT	DMSO	525	9	22	channel1:WT_DMSO_T0022_00009_CH4	3.288	1.083	3.271	84.181	0.671	0.236	5.9875	42.8685
1	WT	DMSO	550	9	23	channel1:WT_DMSO_T0023_00009_CH4	3.295	1.104	3.281	84.74	0.67	0.243	6.325	44.14
1	WT	DMSO	575	9	24	channel1:WT_DMSO_T0024_00009_CH4	3.315	1.115	3.302	84.952	0.681	0.263	6.6375	47.7729
1	WT	DMSO	600	9	25	channel1:WT_DMSO_T0025_00009_CH4	3.32	0.823	0	95.943	0.682	0.268	6.8	48.6812
1	WT	DMSO	625	9	26	channel1:WT_DMSO_T0026_00009_CH4	3.328	1.083	3.312	84.432	0.682	0.276	7.0125	50.1343
1	WT	DMSO	650	9	27	channel1:WT_DMSO_T0027_00009_CH4	3.337	0.854	0	95.194	0.681	0.285	7.15	51.7692
1	WT	DMSO	675	9	28	channel1:WT_DMSO_T0028_00009_CH4	3.339	0.854	0	95.55	0.681	0.287	7.4375	52.1325
1	WT	DMSO	700	9	29	channel1:WT_DMSO_T0029_00009_CH4	3.36	0.823	0	95.693	0.675	0.308	7.7125	55.947
1	WT	DMSO	725	9	30	channel1:WT_DMSO_T0030_00009_CH4	3.361	0.833	0	95.87	0.674	0.309	7.85	56.1287
1	WT	DMSO	750	9	31	channel1:WT_DMSO_T0031_00009_CH4	3.371	0.823	0	95.675	0.674	0.319	8.025	57.9451
1	WT	DMSO	775	9	32	channel1:WT_DMSO_T0032_00009_CH4	3.375	0.823	0	96.379	0.674	0.323	8.1625	58.6717
1	WT	DMSO	800	9	33	channel1:WT_DMSO_T0033_00009_CH4	3.382	0.844	0	95.834	0.674	0.33	8.4875	59.9432
1	WT	DMSO	825	9	34	channel1:WT_DMSO_T0034_00009_CH4	3.401	0.844	0	95.449	0.674	0.349	8.775	63.3945
1	WT	DMSO	850	9	35	channel1:WT_DMSO_T0035_00009_CH4	3.405	0.833	0	96.147	0.675	0.353	8.925	64.1211
1	WT	DMSO	875	9	36	channel1:WT_DMSO_T0036_00009_CH4	3.413	0.823	0	95.78	0.678	0.361	9.15	65.5743
1	WT	DMSO	900	9	37	channel1:WT_DMSO_T0037_00009_CH4	3.423	0.823	0	95.589	0.679	0.371	9.3875	67.3907
1	WT	DMSO	925	9	38	channel1:WT_DMSO_T0038_00009_CH4	3.432	0.844	0	95.399	0.675	0.38	9.65	69.0255
1	WT	DMSO	950	9	39	channel1:WT_DMSO_T0039_00009_CH4	3.444	0.844	0	95.728	0.674	0.392	9.8125	71.2053
1	WT	DMSO	975	9	40	channel1:WT_DMSO_T0040_00009_CH4	3.445	0.833	0	95.9	0.681	0.393	9.975	71.3869
1	WT	DMSO	1000	9	41	channel1:WT_DMSO_T0041_00009_CH4	3.457	0.833	0	96.054	0.681	0.405	10.25	73.5667
1	WT	DMSO	1025	9	42	channel1:WT_DMSO_T0042_00009_CH4	3.467	0.833	0	96.036	0.673	0.415	10.4875	75.3832
1	WT	DMSO	1050	9	43	channel1:WT_DMSO_T0043_00009_CH4	3.476	0.823	0	95.847	0.676	0.424	10.725	77.018
1	WT	DMSO	1075	9	44	channel1:WT_DMSO_T0044_00009_CH4	3.486	0.833	0	95.659	0.674	0.434	10.925	78.8344
1	WT	DMSO	1100	9	45	channel1:WT_DMSO_T0045_00009_CH4	3.492	0.812	0	96.68	0.675	0.44	11.15	79.9243
1	WT	DMSO	1125	9	46	channel1:WT_DMSO_T0046_00009_CH4	3.504	0.854	0	95.287	0.671	0.452	11.475	82.1041
1	WT	DMSO	1150	9	47	channel1:WT_DMSO_T0047_00009_CH4	3.518	0.823	0	95.778	0.671	0.466	11.6875	84.6471
1	WT	DMSO	1175	9	48	channel1:WT_DMSO_T0048_00009_CH4	3.521	0.823	0	96.284	0.67	0.469	11.8	85.1921
1	WT	DMSO	1200	9	49	channel1:WT_DMSO_T0049_00009_CH4	3.527	0.854	0	95.593	0.68	0.475	11.9625	86.2819
1	WT	DMSO	1225	9	50	channel1:WT_DMSO_T0050_00009_CH4	3.534	0.833	0	96.601	0.677	0.482	330.05	87.5535
1	WT	IAA10nM	0	1	1	channel1:WT_NAA10nM_T0001_00010_CH4	2.86	0.49	0	105.2	0.631	0	0.5125	0
1	WT	IAA10nM	25	1	2	channel1:WT_NAA10nM_T0002_00010_CH4	2.901	0.49	0	104.984	0.632	0.041	0.7625	7.44749
1	WT	IAA10nM	50	1	3	channel1:WT_NAA10nM_T0003_00010_CH4	2.88	0.49	0	104.237	0.63	0.02	0.8125	3.63292
1	WT	IAA10nM	75	1	4	channel1:WT_NAA10nM_T0004_00010_CH4	2.905	0.49	0	104.534	0.631	0.045	1.125	8.17408
1	WT	IAA10nM	100	1	5	channel1:WT_NAA10nM_T0005_00010_CH4	2.905	0.49	0	104.534	0.629	0.045	0.8125	8.17408
1	WT	IAA10nM	125	1	6	channel1:WT_NAA10nM_T0006_00010_CH4	2.88	0.479	0	104.237	0.632	0.02	0.6625	3.63292
1	WT	IAA10nM	150	1	7	channel1:WT_NAA10nM_T0007_00010_CH4	2.893	0.479	0	104.387	0.631	0.033	0.725	5.99432
1	WT	IAA10nM	175	1	8	channel1:WT_NAA10nM_T0008_00010_CH4	2.885	0.479	0	104.638	0.633	0.025	0.9125	4.54115
1	WT	IAA10nM	200	1	9	channel1:WT_NAA10nM_T0009_00010_CH4	2.908	0.479	0	104.733	0.633	0.048	1.1625	8.71902
1	WT	IAA10nM	225	1	10	channel1:WT_NAA10nM_T0010_00010_CH4	2.905	0.479	0	104.534	0.635	0.045	1.125	8.17408
1	WT	IAA10nM	250	1	11	channel1:WT_NAA10nM_T0011_00010_CH4	2.905	0.479	0	104.534	0.635	0.045	1	8.17408
1	WT	IAA10nM	275	1	12	channel1:WT_NAA10nM_T0012_00010_CH4	2.895	0.49	0	104.586	0.634	0.035	1.0375	6.35762
1	WT	IAA10nM	300	1	13	channel1:WT_NAA10nM_T0013_00010_CH4	2.908	0.49	0	104.733	0.634	0.048	1.0375	8.71902
1	WT	IAA10nM	325	1	14	channel1:WT_NAA10nM_T0014_00010_CH4	2.895	0.49	0	104.586	0.633	0.035	0.975	6.35762
1	WT	IAA10nM	350	1	15	channel1:WT_NAA10nM_T0015_00010_CH4	2.903	0.49	0	104.335	0.634	0.043	1.1	7.81079
1	WT	IAA10nM	375	1	16	channel1:WT_NAA10nM_T0016_00010_CH4	2.905	0.49	0	104.534	0.632	0.045	1.4125	8.17408
1	WT	IAA10nM	400	1	17	channel1:WT_NAA10nM_T0017_00010_CH4	2.928	0.49	0	104.629	0.63	0.068	1.675	12.3519
1	WT	IAA10nM	425	1	18	channel1:WT_NAA10nM_T0018_00010_CH4	2.926	0.479	0	104.432	0.631	0.066	1.5875	11.9886
1	WT	IAA10nM	450	1	19	channel1:WT_NAA10nM_T0019_00010_CH4	2.921	0.479	0	104.879	0.633	0.061	1.3625	11.0804
1	WT	IAA10nM	475	1	20	channel1:WT_NAA10nM_T0020_00010_CH4	2.908	0.49	0	103.887	0.632	0.048	1.1	8.71902
1	WT	IAA10nM	500	1	21	channel1:WT_NAA10nM_T0021_00010_CH4	2.9	0.49	0	104.136	0.632	0.04	0.975	7.26585
1	WT	IAA10nM	525	1	22	channel1:WT_NAA10nM_T0022_00010_CH4	2.898	0.49	0	104.785	0.632	0.038	0.9125	6.90255
1	WT	IAA10nM	550	1	23	channel1:WT_NAA10nM_T0023_00010_CH4	2.895	0.49	0	104.586	0.634	0.035	1	6.35762
1	WT	IAA10nM	575	1	24	channel1:WT_NAA10nM_T0024_00010_CH4	2.905	0.49	0	104.534	0.633	0.045	1.2625	8.17408
1	WT	IAA10nM	600	1	25	channel1:WT_NAA10nM_T0025_00010_CH4	2.916	0.479	0	104.483	0.635	0.056	1.4	10.1722
1	WT	IAA10nM	625	1	26	channel1:WT_NAA10nM_T0026_00010_CH4	2.916	0.49	0	104.483	0.633	0.056	1.525	10.1722
1	WT	IAA10nM	650	1	27	channel1:WT_NAA10nM_T0027_00010_CH4	2.926	0.469	0	104.432	0.632	0.066	1.5875	11.9886
1	WT	IAA10nM	675	1	28	channel1:WT_NAA10nM_T0028_00010_CH4	2.921	0.49	0	104.036	0.634	0.061	1.525	11.0804
1	WT	IAA10nM	700	1	29	channel1:WT_NAA10nM_T0029_00010_CH4	2.921	0.479	0	104.036	0.635	0.061	1.5625	11.0804
1	WT	IAA10nM	725	1	30	channel1:WT_NAA10nM_T0030_00010_CH4	2.924	0.469	0	105.076	0.634	0.064	1.625	11.6254
1	WT	IAA10nM	750	1	31	channel1:WT_NAA10nM_T0031_00010_CH4	2.926	0.49	0	104.432	0.634	0.066	1.55	11.9886
1	WT	IAA10nM	775	1	32	channel1:WT_NAA10nM_T0032_00010_CH4	2.918	0.49	0	104.681	0.634	0.058	1.5125	10.5355
1	WT	IAA10nM	800	1	33	channel1:WT_NAA10nM_T0033_00010_CH4	2.923	0.49	0	104.234	0.634	0.063	1.5125	11.4437
1	WT	IAA10nM	825	1	34	channel1:WT_NAA10nM_T0034_00010_CH4	2.918	0.49	0	104.681	0.634	0.058	1.55	10.5355
1	WT	IAA10nM	850	1	35	channel1:WT_NAA10nM_T0035_00010_CH4	2.926	0.49	0	104.432	0.635	0.066	1.5875	11.9886
1	WT	IAA10nM	875	1	36	channel1:WT_NAA10nM_T0036_00010_CH4	2.921	0.49	0	104.879	0.635	0.061	1.4875	11.0804
1	WT	IAA10nM	900	1	37	channel1:WT_NAA10nM_T0037_00010_CH4	2.918	0.469	0	104.681	0.636	0.058	1.525	10.5355
1	WT	IAA10nM	925	1	38	channel1:WT_NAA10nM_T0038_00010_CH4	2.924	0.469	0	105.076	0.631	0.064	1.6	11.6254
1	WT	IAA10nM	950	1	39	channel1:WT_NAA10nM_T0039_00010_CH4	2.924	0.479	0	105.076	0.634	0.064	1.625	11.6254
1	WT	IAA10nM	975	1	40	channel1:WT_NAA10nM_T0040_00010_CH4	2.926	0.49	0	104.432	0.637	0.066	1.7125	11.9886
1	WT	IAA10nM	1000	1	41	channel1:WT_NAA10nM_T0041_00010_CH4	2.931	0.49	0	104.826	0.632	0.071	1.65	12.8969
1	WT	IAA10nM	1025	1	42	channel1:WT_NAA10nM_T0042_00010_CH4	2.921	0.49	0	104.879	0.637	0.061	1.6125	11.0804
1	WT	IAA10nM	1050	1	43	channel1:WT_NAA10nM_T0043_00010_CH4	2.928	0.49	0	104.629	0.634	0.068	1.7625	12.3519
1	WT	IAA10nM	1075	1	44	channel1:WT_NAA10nM_T0044_00010_CH4	2.933	0.479	0	104.184	0.63	0.073	1.6375	13.2602
1	WT	IAA10nM	1100	1	45	channel1:WT_NAA10nM_T0045_00010_CH4	2.918	0.479	0	104.681	0.634	0.058	1.575	10.5355
1	WT	IAA10nM	1125	1	46	channel1:WT_NAA10nM_T0046_00010_CH4	2.928	0.49	0	104.629	0.632	0.068	1.7375	12.3519
1	WT	IAA10nM	1150	1	47	channel1:WT_NAA10nM_T0047_00010_CH4	2.931	0.469	0	104.826	0.632	0.071	1.775	12.8969
1	WT	IAA10nM	1175	1	48	channel1:WT_NAA10nM_T0048_00010_CH4	2.931	0.469	0	104.826	0.634	0.071	1.8125	12.8969
1	WT	IAA10nM	1200	1	49	channel1:WT_NAA10nM_T0049_00010_CH4	2.934	0.469	0	105.023	0.635	0.074	1.6875	13.4418
1	WT	IAA10nM	1225	1	50	channel1:WT_NAA10nM_T0050_00010_CH4	2.921	0.49	0	104.879	0.637	0.061	65.1875	11.0804
1	WT	IAA10nM	0	2	1	channel1:WT_NAA10nM_T0001_00011_CH4	3.176	0.573	0	96.402	0.787	0	0.4625	0
1	WT	IAA10nM	25	2	2	channel1:WT_NAA10nM_T0002_00011_CH4	3.213	0.562	0	97.263	0.744	0.037	0.9	6.72091
1	WT	IAA10nM	50	2	3	channel1:WT_NAA10nM_T0003_00011_CH4	3.211	0.562	0	96.894	0.741	0.035	1.0125	6.35762
1	WT	IAA10nM	75	2	4	channel1:WT_NAA10nM_T0004_00011_CH4	3.222	0.562	0	97.056	0.737	0.046	1.0125	8.35572
1	WT	IAA10nM	100	2	5	channel1:WT_NAA10nM_T0005_00011_CH4	3.211	0.562	0	96.894	0.732	0.035	0.9	6.35762
1	WT	IAA10nM	125	2	6	channel1:WT_NAA10nM_T0006_00011_CH4	3.213	0.573	0	97.263	0.733	0.037	1.025	6.72091
1	WT	IAA10nM	150	2	7	channel1:WT_NAA10nM_T0007_00011_CH4	3.221	0.562	0	96.872	0.732	0.045	1.025	8.17408
1	WT	IAA10nM	175	2	8	channel1:WT_NAA10nM_T0008_00011_CH4	3.213	0.562	0	97.263	0.73	0.037	1.1375	6.72091
1	WT	IAA10nM	200	2	9	channel1:WT_NAA10nM_T0009_00011_CH4	3.23	0.562	0	96.667	0.736	0.054	1.2875	9.80889
1	WT	IAA10nM	225	2	10	channel1:WT_NAA10nM_T0010_00011_CH4	3.225	0.562	0	97.423	0.733	0.049	1.175	8.90066
1	WT	IAA10nM	250	2	11	channel1:WT_NAA10nM_T0011_00011_CH4	3.221	0.562	0	96.872	0.733	0.045	1.175	8.17408
1	WT	IAA10nM	275	2	12	channel1:WT_NAA10nM_T0012_00011_CH4	3.225	0.562	0	97.423	0.734	0.049	1.425	8.90066
1	WT	IAA10nM	300	2	13	channel1:WT_NAA10nM_T0013_00011_CH4	3.241	0.573	0	96.645	0.728	0.065	1.5	11.807
1	WT	IAA10nM	325	2	14	channel1:WT_NAA10nM_T0014_00011_CH4	3.231	0.573	0	96.85	0.731	0.055	1.3	9.99054
1	WT	IAA10nM	350	2	15	channel1:WT_NAA10nM_T0015_00011_CH4	3.225	0.562	0	97.423	0.726	0.049	1.225	8.90066
1	WT	IAA10nM	375	2	16	channel1:WT_NAA10nM_T0016_00011_CH4	3.225	0.562	0	97.423	0.732	0.049	1.325	8.90066
1	WT	IAA10nM	400	2	17	channel1:WT_NAA10nM_T0017_00011_CH4	3.233	0.562	0	97.033	0.739	0.057	1.3625	10.3538
1	WT	IAA10nM	425	2	18	channel1:WT_NAA10nM_T0018_00011_CH4	3.228	0.573	0	96.299	0.734	0.052	1.2125	9.4456
1	WT	IAA10nM	450	2	19	channel1:WT_NAA10nM_T0019_00011_CH4	3.221	0.583	0	96.872	0.727	0.045	1.275	8.17408
1	WT	IAA10nM	475	2	20	channel1:WT_NAA10nM_T0020_00011_CH4	3.233	0.573	0	97.033	0.731	0.057	1.5375	10.3538
1	WT	IAA10nM	500	2	21	channel1:WT_NAA10nM_T0021_00011_CH4	3.242	0.562	0	96.828	0.727	0.066	1.6375	11.9886
1	WT	IAA10nM	525	2	22	channel1:WT_NAA10nM_T0022_00011_CH4	3.241	0.562	0	96.645	0.732	0.065	1.7375	11.807
1	WT	IAA10nM	550	2	23	channel1:WT_NAA10nM_T0023_00011_CH4	3.25	0.573	0	96.442	0.734	0.074	1.875	13.4418
1	WT	IAA10nM	575	2	24	channel1:WT_NAA10nM_T0024_00011_CH4	3.252	0.562	0	96.806	0.733	0.076	1.9	13.8051
1	WT	IAA10nM	600	2	25	channel1:WT_NAA10nM_T0025_00011_CH4	3.252	0.562	0	96.806	0.732	0.076	1.9125	13.8051
1	WT	IAA10nM	625	2	26	channel1:WT_NAA10nM_T0026_00011_CH4	3.253	0.562	0	96.988	0.728	0.077	1.7875	13.9868
1	WT	IAA10nM	650	2	27	channel1:WT_NAA10nM_T0027_00011_CH4	3.242	0.573	0	96.828	0.733	0.066	1.7625	11.9886
1	WT	IAA10nM	675	2	28	channel1:WT_NAA10nM_T0028_00011_CH4	3.251	0.573	0	96.624	0.733	0.075	1.7875	13.6235
1	WT	IAA10nM	700	2	29	channel1:WT_NAA10nM_T0029_00011_CH4	3.244	0.562	0	97.193	0.729	0.068	1.5625	12.3519
1	WT	IAA10nM	725	2	30	channel1:WT_NAA10nM_T0030_00011_CH4	3.233	0.573	0	97.033	0.735	0.057	1.6625	10.3538
1	WT	IAA10nM	750	2	31	channel1:WT_NAA10nM_T0031_00011_CH4	3.252	0.562	0	96.806	0.734	0.076	2.025	13.8051
1	WT	IAA10nM	775	2	32	channel1:WT_NAA10nM_T0032_00011_CH4	3.262	0.562	0	96.785	0.733	0.086	1.8625	15.6216
1	WT	IAA10nM	800	2	33	channel1:WT_NAA10nM_T0033_00011_CH4	3.239	0.562	0	96.462	0.732	0.063	1.45	11.4437
1	WT	IAA10nM	825	2	34	channel1:WT_NAA10nM_T0034_00011_CH4	3.229	0.562	0	96.483	0.734	0.053	1.6125	9.62725
1	WT	IAA10nM	850	2	35	channel1:WT_NAA10nM_T0035_00011_CH4	3.252	0.573	0	96.806	0.732	0.076	1.9125	13.8051
1	WT	IAA10nM	875	2	36	channel1:WT_NAA10nM_T0036_00011_CH4	3.253	0.562	0	96.988	0.734	0.077	1.9125	13.9868
1	WT	IAA10nM	900	2	37	channel1:WT_NAA10nM_T0037_00011_CH4	3.252	0.562	0	96.806	0.735	0.076	1.9375	13.8051
1	WT	IAA10nM	925	2	38	channel1:WT_NAA10nM_T0038_00011_CH4	3.255	0.562	0	97.171	0.736	0.079	1.975	14.35
1	WT	IAA10nM	950	2	39	channel1:WT_NAA10nM_T0039_00011_CH4	3.255	0.562	0	97.171	0.734	0.079	1.8375	14.35
1	WT	IAA10nM	975	2	40	channel1:WT_NAA10nM_T0040_00011_CH4	3.244	0.562	0	97.193	0.734	0.068	1.675	12.3519
1	WT	IAA10nM	1000	2	41	channel1:WT_NAA10nM_T0041_00011_CH4	3.242	0.562	0	96.828	0.736	0.066	1.65	11.9886
1	WT	IAA10nM	1025	2	42	channel1:WT_NAA10nM_T0042_00011_CH4	3.242	0.562	0	96.828	0.733	0.066	1.65	11.9886
1	WT	IAA10nM	1050	2	43	channel1:WT_NAA10nM_T0043_00011_CH4	3.242	0.562	0	96.828	0.734	0.066	1.775	11.9886
1	WT	IAA10nM	1075	2	44	channel1:WT_NAA10nM_T0044_00011_CH4	3.252	0.562	0	96.806	0.733	0.076	2.075	13.8051
1	WT	IAA10nM	1100	2	45	channel1:WT_NAA10nM_T0045_00011_CH4	3.266	0.562	0	97.329	0.735	0.09	2.3375	16.3482
1	WT	IAA10nM	1125	2	46	channel1:WT_NAA10nM_T0046_00011_CH4	3.273	0.562	0	96.763	0.735	0.097	2.2	17.6197
1	WT	IAA10nM	1150	2	47	channel1:WT_NAA10nM_T0047_00011_CH4	3.255	0.562	0	97.171	0.733	0.079	2.1	14.35
1	WT	IAA10nM	1175	2	48	channel1:WT_NAA10nM_T0048_00011_CH4	3.265	0.562	0	97.148	0.736	0.089	2.0625	16.1665
1	WT	IAA10nM	1200	2	49	channel1:WT_NAA10nM_T0049_00011_CH4	3.252	0.562	0	96.806	0.734	0.076	1.9375	13.8051
1	WT	IAA10nM	1225	2	50	channel1:WT_NAA10nM_T0050_00011_CH4	3.255	0.573	0	97.171	0.734	0.079	76.8875	14.35
1	WT	IAA10nM	0	3	1	channel1-1:WT_NAA10nM_T0001_00011_CH4	3.185	0.958	3.156	82.294	0.842	0	-0.3375	0
1	WT	IAA10nM	25	3	2	channel1-1:WT_NAA10nM_T0002_00011_CH4	3.158	0.927	3.125	81.656	0.836	-0.027	-0.5375	-4.90445
1	WT	IAA10nM	50	3	3	channel1-1:WT_NAA10nM_T0003_00011_CH4	3.169	0.927	3.135	81.683	0.841	-0.016	-0.4	-2.90634
1	WT	IAA10nM	75	3	4	channel1-1:WT_NAA10nM_T0004_00011_CH4	3.169	0.99	3.146	83.015	0.846	-0.016	-0.5125	-2.90634
1	WT	IAA10nM	100	3	5	channel1-1:WT_NAA10nM_T0005_00011_CH4	3.16	0.917	3.125	81.469	0.844	-0.025	-0.3875	-4.54115
1	WT	IAA10nM	125	3	6	channel1-1:WT_NAA10nM_T0006_00011_CH4	3.179	0.927	3.146	81.711	0.844	-0.006	-0.1875	-1.08988
1	WT	IAA10nM	150	3	7	channel1-1:WT_NAA10nM_T0007_00011_CH4	3.176	0.948	3.146	82.082	0.849	-0.009	0.075	-1.63482
1	WT	IAA10nM	175	3	8	channel1-1:WT_NAA10nM_T0008_00011_CH4	3.2	0.927	3.167	81.764	0.851	0.015	0.15	2.72469
1	WT	IAA10nM	200	3	9	channel1-1:WT_NAA10nM_T0009_00011_CH4	3.182	0.979	3.156	82.666	0.85	-0.003	-0.1625	-0.544939
1	WT	IAA10nM	225	3	10	channel1-1:WT_NAA10nM_T0010_00011_CH4	3.175	0.958	3.146	82.269	0.85	-0.01	-0.075	-1.81646
1	WT	IAA10nM	250	3	11	channel1-1:WT_NAA10nM_T0011_00011_CH4	3.189	0.927	3.156	81.738	0.85	0.004	0	0.726585
1	WT	IAA10nM	275	3	12	channel1-1:WT_NAA10nM_T0012_00011_CH4	3.181	0.917	3.146	81.525	0.84	-0.004	-0.0125	-0.726585
1	WT	IAA10nM	300	3	13	channel1-1:WT_NAA10nM_T0013_00011_CH4	3.188	0.938	3.156	81.923	0.849	0.003	0.2625	0.544939
1	WT	IAA10nM	325	3	14	channel1-1:WT_NAA10nM_T0014_00011_CH4	3.203	0.958	3.177	82.713	0.849	0.018	0.4625	3.26963
1	WT	IAA10nM	350	3	15	channel1-1:WT_NAA10nM_T0015_00011_CH4	3.204	0.958	3.177	82.528	0.846	0.019	0.475	3.45128
1	WT	IAA10nM	375	3	16	channel1-1:WT_NAA10nM_T0016_00011_CH4	3.204	0.958	3.177	82.528	0.852	0.019	0.1125	3.45128
1	WT	IAA10nM	400	3	17	channel1-1:WT_NAA10nM_T0017_00011_CH4	3.175	0.948	3.146	82.269	0.671	-0.01	-0.1625	-1.81646
1	WT	IAA10nM	425	3	18	channel1-1:WT_NAA10nM_T0018_00011_CH4	3.182	0.979	3.156	82.666	0.69	-0.003	0.225	-0.544939
1	WT	IAA10nM	450	3	19	channel1-1:WT_NAA10nM_T0019_00011_CH4	3.206	0.958	3.177	82.344	0.67	0.021	0.3625	3.81457
1	WT	IAA10nM	475	3	20	channel1-1:WT_NAA10nM_T0020_00011_CH4	3.193	0.958	3.167	82.689	0.676	0.008	0.175	1.45317
1	WT	IAA10nM	500	3	21	channel1-1:WT_NAA10nM_T0021_00011_CH4	3.191	0.979	3.167	82.875	0.67	0.006	0.1375	1.08988
1	WT	IAA10nM	525	3	22	channel1-1:WT_NAA10nM_T0022_00011_CH4	3.19	0.979	3.167	83.061	0.677	0.005	0.275	0.908231
1	WT	IAA10nM	550	3	23	channel1-1:WT_NAA10nM_T0023_00011_CH4	3.202	0.979	3.177	82.898	0.676	0.017	0.2875	3.08798
1	WT	IAA10nM	575	3	24	channel1-1:WT_NAA10nM_T0024_00011_CH4	3.191	0.979	3.167	82.875	0.686	0.006	0.5375	1.08988
1	WT	IAA10nM	600	3	25	channel1-1:WT_NAA10nM_T0025_00011_CH4	3.222	0.938	3.188	81.634	0.678	0.037	0.575	6.72091
1	WT	IAA10nM	625	3	26	channel1-1:WT_NAA10nM_T0026_00011_CH4	3.194	0.958	3.167	82.504	0.674	0.009	0.4125	1.63482
1	WT	IAA10nM	650	3	27	channel1-1:WT_NAA10nM_T0027_00011_CH4	3.209	0.958	3.177	81.975	0.674	0.024	0.25	4.35951
1	WT	IAA10nM	675	3	28	channel1-1:WT_NAA10nM_T0028_00011_CH4	3.181	0.938	3.146	81.525	0.674	-0.004	0.3875	-0.726585
1	WT	IAA10nM	700	3	29	channel1-1:WT_NAA10nM_T0029_00011_CH4	3.22	0.938	3.188	81.817	0.67	0.035	0.525	6.35762
1	WT	IAA10nM	725	3	30	channel1-1:WT_NAA10nM_T0030_00011_CH4	3.192	0.917	3.156	81.368	0.67	0.007	0.1625	1.27152
1	WT	IAA10nM	750	3	31	channel1-1:WT_NAA10nM_T0031_00011_CH4	3.191	0.958	3.167	82.875	0.669	0.006	0.375	1.08988
1	WT	IAA10nM	775	3	32	channel1-1:WT_NAA10nM_T0032_00011_CH4	3.209	0.938	3.177	81.975	0.675	0.024	0.5125	4.35951
1	WT	IAA10nM	800	3	33	channel1-1:WT_NAA10nM_T0033_00011_CH4	3.202	0.979	3.177	82.898	0.671	0.017	0.25	3.08798
1	WT	IAA10nM	825	3	34	channel1-1:WT_NAA10nM_T0034_00011_CH4	3.188	0.99	3.167	83.432	0.673	0.003	0.275	0.544939
1	WT	IAA10nM	850	3	35	channel1-1:WT_NAA10nM_T0035_00011_CH4	3.204	0.906	3.167	81.211	0.673	0.019	0.5875	3.45128
1	WT	IAA10nM	875	3	36	channel1-1:WT_NAA10nM_T0036_00011_CH4	3.213	0.979	3.188	82.737	0.677	0.028	0.6125	5.08609
1	WT	IAA10nM	900	3	37	channel1-1:WT_NAA10nM_T0037_00011_CH4	3.206	0.906	3.167	81.027	0.677	0.021	0.6125	3.81457
1	WT	IAA10nM	925	3	38	channel1-1:WT_NAA10nM_T0038_00011_CH4	3.213	0.979	3.188	82.737	0.68	0.028	0.925	5.08609
1	WT	IAA10nM	950	3	39	channel1-1:WT_NAA10nM_T0039_00011_CH4	3.231	0.948	3.198	81.844	0.678	0.046	0.8	8.35572
1	WT	IAA10nM	975	3	40	channel1-1:WT_NAA10nM_T0040_00011_CH4	3.203	0.99	3.177	82.713	0.675	0.018	0.775	3.26963
1	WT	IAA10nM	1000	3	41	channel1-1:WT_NAA10nM_T0041_00011_CH4	3.229	0.927	3.198	82.027	0.669	0.044	0.925	7.99243
1	WT	IAA10nM	1025	3	42	channel1-1:WT_NAA10nM_T0042_00011_CH4	3.215	0.938	3.188	82.553	0.676	0.03	0.8	5.44939
1	WT	IAA10nM	1050	3	43	channel1-1:WT_NAA10nM_T0043_00011_CH4	3.219	0.927	3.188	82.001	0.678	0.034	0.625	6.17597
1	WT	IAA10nM	1075	3	44	channel1-1:WT_NAA10nM_T0044_00011_CH4	3.201	0.906	3.167	81.58	0.675	0.016	0.2125	2.90634
1	WT	IAA10nM	1100	3	45	channel1-1:WT_NAA10nM_T0045_00011_CH4	3.186	1	3.167	83.618	0.673	0.001	0.2875	0.181646
1	WT	IAA10nM	1125	3	46	channel1-1:WT_NAA10nM_T0046_00011_CH4	3.207	0.917	3.177	82.159	0.674	0.022	0.475	3.99622
1	WT	IAA10nM	1150	3	47	channel1-1:WT_NAA10nM_T0047_00011_CH4	3.201	0.906	3.167	81.58	0.669	0.016	0.425	2.90634
1	WT	IAA10nM	1175	3	48	channel1-1:WT_NAA10nM_T0048_00011_CH4	3.203	0.917	3.167	81.396	0.674	0.018	0.625	3.26963
1	WT	IAA10nM	1200	3	49	channel1-1:WT_NAA10nM_T0049_00011_CH4	3.217	0.917	3.188	82.185	0.67	0.032	0.75	5.81268
1	WT	IAA10nM	1225	3	50	channel1-1:WT_NAA10nM_T0050_00011_CH4	3.213	0.906	3.177	81.423	0.675	0.028	13.925	5.08609
1	WT	IAA10nM	0	4	1	channel1:WT_NAA10nM_T0001_00012_CH4	2.994	0.885	2.948	79.98	0.657	0	-0.1375	0
1	WT	IAA10nM	25	4	2	channel1:WT_NAA10nM_T0002_00012_CH4	2.983	0.885	2.938	79.946	0.664	-0.011	-0.1875	-1.99811
1	WT	IAA10nM	50	4	3	channel1:WT_NAA10nM_T0003_00012_CH4	2.99	0.896	2.948	80.374	0.667	-0.004	-0.1625	-0.726585
1	WT	IAA10nM	75	4	4	channel1:WT_NAA10nM_T0004_00012_CH4	2.985	0.906	2.938	79.749	0.66	-0.009	0.0375	-1.63482
1	WT	IAA10nM	100	4	5	channel1:WT_NAA10nM_T0005_00012_CH4	3.006	0.885	2.958	79.819	0.661	0.012	0.425	2.17975
1	WT	IAA10nM	125	4	6	channel1:WT_NAA10nM_T0006_00012_CH4	3.016	0.875	2.969	79.854	0.66	0.022	0.2875	3.99622
1	WT	IAA10nM	150	4	7	channel1:WT_NAA10nM_T0007_00012_CH4	2.995	0.865	2.948	79.784	0.665	0.001	0.3125	0.181646
1	WT	IAA10nM	175	4	8	channel1:WT_NAA10nM_T0008_00012_CH4	3.018	0.865	2.969	79.66	0.662	0.024	0.275	4.35951
1	WT	IAA10nM	200	4	9	channel1:WT_NAA10nM_T0009_00012_CH4	2.992	0.896	2.948	80.177	0.667	-0.002	-0.075	-0.363292
1	WT	IAA10nM	225	4	10	channel1:WT_NAA10nM_T0010_00012_CH4	2.99	0.896	2.948	80.374	0.667	-0.004	-0.0125	-0.726585
1	WT	IAA10nM	250	4	11	channel1:WT_NAA10nM_T0011_00012_CH4	2.997	0.917	2.958	80.8	0.668	0.003	0.2625	0.544939
1	WT	IAA10nM	275	4	12	channel1:WT_NAA10nM_T0012_00012_CH4	3.012	0.885	2.969	80.245	0.668	0.018	0.5875	3.26963
1	WT	IAA10nM	300	4	13	channel1:WT_NAA10nM_T0013_00012_CH4	3.023	0.885	2.979	80.278	0.671	0.029	0.1875	5.26774
1	WT	IAA10nM	325	4	14	channel1:WT_NAA10nM_T0014_00012_CH4	2.98	0.896	2.938	80.34	0.676	-0.014	-0.075	-2.54305
1	WT	IAA10nM	350	4	15	channel1:WT_NAA10nM_T0015_00012_CH4	3.002	0.896	2.958	80.211	0.668	0.008	0.4625	1.45317
1	WT	IAA10nM	375	4	16	channel1:WT_NAA10nM_T0016_00012_CH4	3.023	0.896	2.979	80.278	0.668	0.029	0.6125	5.26774
1	WT	IAA10nM	400	4	17	channel1:WT_NAA10nM_T0017_00012_CH4	3.014	0.885	2.969	80.049	0.67	0.02	0.375	3.63292
1	WT	IAA10nM	425	4	18	channel1:WT_NAA10nM_T0018_00012_CH4	3.004	0.896	2.958	80.015	0.67	0.01	0.225	1.81646
1	WT	IAA10nM	450	4	19	channel1:WT_NAA10nM_T0019_00012_CH4	3.002	0.906	2.958	80.211	0.667	0.008	0.575	1.45317
1	WT	IAA10nM	475	4	20	channel1:WT_NAA10nM_T0020_00012_CH4	3.032	0.854	2.979	79.308	0.667	0.038	0.65	6.90255
1	WT	IAA10nM	500	4	21	channel1:WT_NAA10nM_T0021_00012_CH4	3.008	0.865	2.958	79.624	0.669	0.014	0.4	2.54305
1	WT	IAA10nM	525	4	22	channel1:WT_NAA10nM_T0022_00012_CH4	3.012	0.896	2.969	80.245	0.665	0.018	0.625	3.26963
1	WT	IAA10nM	550	4	23	channel1:WT_NAA10nM_T0023_00012_CH4	3.026	0.875	2.979	79.889	0.668	0.032	0.525	5.81268
1	WT	IAA10nM	575	4	24	channel1:WT_NAA10nM_T0024_00012_CH4	3.004	0.896	2.958	80.015	0.668	0.01	0.1	1.81646
1	WT	IAA10nM	600	4	25	channel1:WT_NAA10nM_T0025_00012_CH4	2.992	0.896	2.948	80.177	0.667	-0.002	0.125	-0.363292
1	WT	IAA10nM	625	4	26	channel1:WT_NAA10nM_T0026_00012_CH4	3.006	0.885	2.958	79.819	0.678	0.012	0.55	2.17975
1	WT	IAA10nM	650	4	27	channel1:WT_NAA10nM_T0027_00012_CH4	3.026	0.875	2.979	79.889	0.672	0.032	0.8	5.81268
1	WT	IAA10nM	675	4	28	channel1:WT_NAA10nM_T0028_00012_CH4	3.026	0.854	2.99	81.089	0.671	0.032	0.7625	5.81268
1	WT	IAA10nM	700	4	29	channel1:WT_NAA10nM_T0029_00012_CH4	3.023	0.896	2.979	80.278	0.673	0.029	1.05	5.26774
1	WT	IAA10nM	725	4	30	channel1:WT_NAA10nM_T0030_00012_CH4	3.049	0.865	3	79.765	0.666	0.055	1.025	9.99054
1	WT	IAA10nM	750	4	31	channel1:WT_NAA10nM_T0031_00012_CH4	3.021	0.896	2.979	80.473	0.667	0.027	0.7	4.90445
1	WT	IAA10nM	775	4	32	channel1:WT_NAA10nM_T0032_00012_CH4	3.023	0.896	2.979	80.278	0.677	0.029	0.6125	5.26774
1	WT	IAA10nM	800	4	33	channel1:WT_NAA10nM_T0033_00012_CH4	3.014	0.896	2.969	80.049	0.668	0.02	0.325	3.63292
1	WT	IAA10nM	825	4	34	channel1:WT_NAA10nM_T0034_00012_CH4	3	0.896	2.958	80.407	0.671	0.006	0.6	1.08988
1	WT	IAA10nM	850	4	35	channel1:WT_NAA10nM_T0035_00012_CH4	3.036	0.865	2.99	79.924	0.683	0.042	1.1375	7.62914
1	WT	IAA10nM	875	4	36	channel1:WT_NAA10nM_T0036_00012_CH4	3.043	0.896	3	80.344	0.684	0.049	0.8625	8.90066
1	WT	IAA10nM	900	4	37	channel1:WT_NAA10nM_T0037_00012_CH4	3.014	0.885	2.969	80.049	0.669	0.02	0.6125	3.63292
1	WT	IAA10nM	925	4	38	channel1:WT_NAA10nM_T0038_00012_CH4	3.023	0.896	2.979	80.278	0.671	0.029	0.9125	5.26774
1	WT	IAA10nM	950	4	39	channel1:WT_NAA10nM_T0039_00012_CH4	3.038	0.875	2.99	79.73	0.67	0.044	1.1	7.99243
1	WT	IAA10nM	975	4	40	channel1:WT_NAA10nM_T0040_00012_CH4	3.038	0.896	2.99	79.73	0.674	0.044	1.125	7.99243
1	WT	IAA10nM	1000	4	41	channel1:WT_NAA10nM_T0041_00012_CH4	3.04	0.875	2.99	79.537	0.679	0.046	1.225	8.35572
1	WT	IAA10nM	1025	4	42	channel1:WT_NAA10nM_T0042_00012_CH4	3.046	0.865	2.99	78.959	0.671	0.052	1.225	9.4456
1	WT	IAA10nM	1050	4	43	channel1:WT_NAA10nM_T0043_00012_CH4	3.04	0.865	2.99	79.537	0.671	0.046	0.975	8.35572
1	WT	IAA10nM	1075	4	44	channel1:WT_NAA10nM_T0044_00012_CH4	3.026	0.896	2.979	79.889	0.672	0.032	0.7625	5.81268
1	WT	IAA10nM	1100	4	45	channel1:WT_NAA10nM_T0045_00012_CH4	3.023	0.896	2.979	80.278	0.671	0.029	0.875	5.26774
1	WT	IAA10nM	1125	4	46	channel1:WT_NAA10nM_T0046_00012_CH4	3.035	0.896	2.99	80.117	0.673	0.041	1.0375	7.44749
1	WT	IAA10nM	1150	4	47	channel1:WT_NAA10nM_T0047_00012_CH4	3.036	0.885	2.99	79.924	0.677	0.042	1.3875	7.62914
1	WT	IAA10nM	1175	4	48	channel1:WT_NAA10nM_T0048_00012_CH4	3.063	0.865	3.01	79.416	0.671	0.069	1.75	12.5336
1	WT	IAA10nM	1200	4	49	channel1:WT_NAA10nM_T0049_00012_CH4	3.065	0.896	3.021	80.218	0.673	0.071	1.6125	12.8969
1	WT	IAA10nM	1225	4	50	channel1:WT_NAA10nM_T0050_00012_CH4	3.052	0.854	3	79.38	0.664	0.058	29.425	10.5355
1	WT	IAA10nM	0	5	51	channel1:WT_NAA10nM_T0001_00013_CH4	2.908	0.458	0	103.041	0.635	0	-0.125	0
1	WT	IAA10nM	25	5	52	channel1:WT_NAA10nM_T0002_00013_CH4	2.898	0.458	0	103.087	0.633	-0.01	0.1	-1.81646
1	WT	IAA10nM	50	5	53	channel1:WT_NAA10nM_T0003_00013_CH4	2.926	0.458	0	102.75	0.635	0.018	0.45	3.26963
1	WT	IAA10nM	75	5	54	channel1:WT_NAA10nM_T0004_00013_CH4	2.926	0.458	0	102.75	0.634	0.018	0.325	3.26963
1	WT	IAA10nM	100	5	55	channel1:WT_NAA10nM_T0005_00013_CH4	2.916	0.479	0	102.795	0.634	0.008	0.0375	1.45317
1	WT	IAA10nM	125	5	56	channel1:WT_NAA10nM_T0006_00013_CH4	2.903	0.458	0	103.488	0.636	-0.005	0.225	-0.908231
1	WT	IAA10nM	150	5	57	channel1:WT_NAA10nM_T0007_00013_CH4	2.931	0.469	0	103.147	0.634	0.023	0.4125	4.17786
1	WT	IAA10nM	175	5	58	channel1:WT_NAA10nM_T0008_00013_CH4	2.918	0.469	0	102.995	0.637	0.01	0.575	1.81646
1	WT	IAA10nM	200	5	59	channel1:WT_NAA10nM_T0009_00013_CH4	2.944	0.458	0	102.463	0.636	0.036	0.7125	6.53926
1	WT	IAA10nM	225	5	60	channel1:WT_NAA10nM_T0010_00013_CH4	2.929	0.469	0	102.949	0.636	0.021	0.65	3.81457
1	WT	IAA10nM	250	5	61	channel1:WT_NAA10nM_T0011_00013_CH4	2.939	0.469	0	102.903	0.636	0.031	0.8	5.63103
1	WT	IAA10nM	275	5	62	channel1:WT_NAA10nM_T0012_00013_CH4	2.941	0.458	0	103.101	0.637	0.033	0.9375	5.99432
1	WT	IAA10nM	300	5	63	channel1:WT_NAA10nM_T0013_00013_CH4	2.95	0.479	0	102.024	0.636	0.042	1.2875	7.62914
1	WT	IAA10nM	325	5	64	channel1:WT_NAA10nM_T0014_00013_CH4	2.969	0.479	0	102.769	0.636	0.061	1.375	11.0804
1	WT	IAA10nM	350	5	65	channel1:WT_NAA10nM_T0015_00013_CH4	2.957	0.479	0	102.616	0.638	0.049	1.45	8.90066
1	WT	IAA10nM	375	5	66	channel1:WT_NAA10nM_T0016_00013_CH4	2.975	0.458	0	102.333	0.638	0.067	1.25	12.1703
1	WT	IAA10nM	400	5	67	channel1:WT_NAA10nM_T0017_00013_CH4	2.941	0.458	0	103.101	0.637	0.033	0.825	5.99432
1	WT	IAA10nM	425	5	68	channel1:WT_NAA10nM_T0018_00013_CH4	2.941	0.469	0	103.101	0.635	0.033	0.925	5.99432
1	WT	IAA10nM	450	5	69	channel1:WT_NAA10nM_T0019_00013_CH4	2.949	0.469	0	102.858	0.637	0.041	1.0875	7.44749
1	WT	IAA10nM	475	5	70	channel1:WT_NAA10nM_T0020_00013_CH4	2.954	0.458	0	103.252	0.637	0.046	1.3375	8.35572
1	WT	IAA10nM	500	5	71	channel1:WT_NAA10nM_T0021_00013_CH4	2.969	0.458	0	102.769	0.636	0.061	1.475	11.0804
1	WT	IAA10nM	525	5	72	channel1:WT_NAA10nM_T0022_00013_CH4	2.965	0.469	0	102.376	0.64	0.057	1.7	10.3538
1	WT	IAA10nM	550	5	73	channel1:WT_NAA10nM_T0023_00013_CH4	2.987	0.458	0	102.485	0.641	0.079	1.9125	14.35
1	WT	IAA10nM	575	5	74	channel1:WT_NAA10nM_T0024_00013_CH4	2.982	0.469	0	102.92	0.638	0.074	1.8125	13.4418
1	WT	IAA10nM	600	5	75	channel1:WT_NAA10nM_T0025_00013_CH4	2.979	0.458	0	102.724	0.634	0.071	1.6125	12.8969
1	WT	IAA10nM	625	5	76	channel1:WT_NAA10nM_T0026_00013_CH4	2.966	0.5	0	101.547	0.636	0.058	1.5625	10.5355
1	WT	IAA10nM	650	5	77	channel1:WT_NAA10nM_T0027_00013_CH4	2.975	0.469	0	102.333	0.635	0.067	1.9875	12.1703
1	WT	IAA10nM	675	5	78	channel1:WT_NAA10nM_T0028_00013_CH4	3	0.469	0	102.637	0.643	0.092	1.9875	16.7114
1	WT	IAA10nM	700	5	79	channel1:WT_NAA10nM_T0029_00013_CH4	2.975	0.469	0	102.333	0.638	0.067	1.825	12.1703
1	WT	IAA10nM	725	5	80	channel1:WT_NAA10nM_T0030_00013_CH4	2.987	0.469	0	102.485	0.64	0.079	2.1	14.35
1	WT	IAA10nM	750	5	81	channel1:WT_NAA10nM_T0031_00013_CH4	2.997	0.469	0	102.442	0.638	0.089	2.05	16.1665
1	WT	IAA10nM	775	5	82	channel1:WT_NAA10nM_T0032_00013_CH4	2.983	0.469	0	102.095	0.64	0.075	1.6625	13.6235
1	WT	IAA10nM	800	5	83	channel1:WT_NAA10nM_T0033_00013_CH4	2.966	0.479	0	101.547	0.643	0.058	1.7125	10.5355
1	WT	IAA10nM	825	5	84	channel1:WT_NAA10nM_T0034_00013_CH4	2.987	0.469	0	102.485	0.64	0.079	2.2625	14.35
1	WT	IAA10nM	850	5	85	channel1:WT_NAA10nM_T0035_00013_CH4	3.01	0.469	0	102.593	0.64	0.102	2.3	18.5279
1	WT	IAA10nM	875	5	86	channel1:WT_NAA10nM_T0036_00013_CH4	2.99	0.469	0	102.68	0.643	0.082	2.075	14.895
1	WT	IAA10nM	900	5	87	channel1:WT_NAA10nM_T0037_00013_CH4	2.992	0.458	0	102.875	0.643	0.084	2.2	15.2583
1	WT	IAA10nM	925	5	88	channel1:WT_NAA10nM_T0038_00013_CH4	3	0.469	0	102.637	0.64	0.092	2.3	16.7114
1	WT	IAA10nM	950	5	89	channel1:WT_NAA10nM_T0039_00013_CH4	3	0.469	0	102.637	0.642	0.092	2.35	16.7114
1	WT	IAA10nM	975	5	90	channel1:WT_NAA10nM_T0040_00013_CH4	3.004	0.458	0	103.024	0.639	0.096	2.0875	17.438
1	WT	IAA10nM	1000	5	91	channel1:WT_NAA10nM_T0041_00013_CH4	2.979	0.458	0	101.703	0.639	0.071	1.6375	12.8969
1	WT	IAA10nM	1025	5	92	channel1:WT_NAA10nM_T0042_00013_CH4	2.968	0.458	0	101.744	0.639	0.06	1.675	10.8988
1	WT	IAA10nM	1050	5	93	channel1:WT_NAA10nM_T0043_00013_CH4	2.982	0.479	0	102.92	0.64	0.074	1.975	13.4418
1	WT	IAA10nM	1075	5	94	channel1:WT_NAA10nM_T0044_00013_CH4	2.992	0.469	0	102.875	0.637	0.084	1.9375	15.2583
1	WT	IAA10nM	1100	5	95	channel1:WT_NAA10nM_T0045_00013_CH4	2.979	0.479	0	102.724	0.64	0.071	2.1375	12.8969
1	WT	IAA10nM	1125	5	96	channel1:WT_NAA10nM_T0046_00013_CH4	3.008	0.458	0	102.4	0.644	0.1	2.5625	18.1646
1	WT	IAA10nM	1150	5	97	channel1:WT_NAA10nM_T0047_00013_CH4	3.013	0.479	0	101.97	0.642	0.105	2.5	19.0728
1	WT	IAA10nM	1175	5	98	channel1:WT_NAA10nM_T0048_00013_CH4	3.003	0.469	0	102.011	0.644	0.095	2.2625	17.2564
1	WT	IAA10nM	1200	5	99	channel1:WT_NAA10nM_T0049_00013_CH4	2.994	0.458	0	103.069	0.638	0.086	2.25	15.6216
1	WT	IAA10nM	1225	5	100	channel1:WT_NAA10nM_T0050_00013_CH4	3.002	0.469	0	102.831	0.645	0.094	72.55	17.0747
1	WT	IAA10nM	0	6	1	channel1:WT_NAA10nM_T0001_00014_CH4	3.192	1.021	3.042	72.334	0.699	0	0.0375	0
1	WT	IAA10nM	25	6	2	channel1:WT_NAA10nM_T0002_00014_CH4	3.195	1.01	3.042	72.156	0.696	0.003	0.2	0.544939
1	WT	IAA10nM	50	6	3	channel1:WT_NAA10nM_T0003_00014_CH4	3.205	0.979	3.042	71.624	0.701	0.013	0.25	2.3614
1	WT	IAA10nM	75	6	4	channel1:WT_NAA10nM_T0004_00014_CH4	3.199	1.01	3.052	72.568	0.699	0.007	0.3	1.27152
1	WT	IAA10nM	100	6	5	channel1:WT_NAA10nM_T0005_00014_CH4	3.209	1.031	3.062	72.624	0.7	0.017	0.425	3.08798
1	WT	IAA10nM	125	6	6	channel1:WT_NAA10nM_T0006_00014_CH4	3.209	1.031	3.062	72.624	0.698	0.017	0.5	3.08798
1	WT	IAA10nM	150	6	7	channel1:WT_NAA10nM_T0007_00014_CH4	3.215	1.031	3.062	72.269	0.698	0.023	0.5875	4.17786
1	WT	IAA10nM	175	6	8	channel1:WT_NAA10nM_T0008_00014_CH4	3.216	1.031	3.073	72.856	0.696	0.024	0.7125	4.35951
1	WT	IAA10nM	200	6	9	channel1:WT_NAA10nM_T0009_00014_CH4	3.225	0.99	3.062	71.741	0.696	0.033	0.7875	5.99432
1	WT	IAA10nM	225	6	10	channel1:WT_NAA10nM_T0010_00014_CH4	3.222	1.031	3.073	72.502	0.697	0.03	0.95	5.44939
1	WT	IAA10nM	250	6	11	channel1:WT_NAA10nM_T0011_00014_CH4	3.238	1.01	3.083	72.206	0.696	0.046	1.1125	8.35572
1	WT	IAA10nM	275	6	12	channel1:WT_NAA10nM_T0012_00014_CH4	3.235	0.969	3.062	71.215	0.696	0.043	1.0375	7.81079
1	WT	IAA10nM	300	6	13	channel1:WT_NAA10nM_T0013_00014_CH4	3.232	1.031	3.083	72.558	0.695	0.04	1.45	7.26585
1	WT	IAA10nM	325	6	14	channel1:WT_NAA10nM_T0014_00014_CH4	3.268	1.021	3.115	72.374	0.697	0.076	1.8375	13.8051
1	WT	IAA10nM	350	6	15	channel1:WT_NAA10nM_T0015_00014_CH4	3.263	0.99	3.125	73.301	0.695	0.071	1.675	12.8969
1	WT	IAA10nM	375	6	16	channel1:WT_NAA10nM_T0016_00014_CH4	3.255	1.01	3.104	72.493	0.695	0.063	1.2125	11.4437
1	WT	IAA10nM	400	6	17	channel1:WT_NAA10nM_T0017_00014_CH4	3.226	0.979	3.083	72.911	0.704	0.034	1.45	6.17597
1	WT	IAA10nM	425	6	18	channel1:WT_NAA10nM_T0018_00014_CH4	3.274	0.99	3.115	72.026	0.706	0.082	1.8875	14.895
1	WT	IAA10nM	450	6	19	channel1:WT_NAA10nM_T0019_00014_CH4	3.261	0.979	3.094	71.565	0.703	0.069	1.7375	12.5336
1	WT	IAA10nM	475	6	20	channel1:WT_NAA10nM_T0020_00014_CH4	3.262	1.042	3.115	72.722	0.696	0.07	1.325	12.7152
1	WT	IAA10nM	500	6	21	channel1:WT_NAA10nM_T0021_00014_CH4	3.228	1.031	3.104	74.08	0.698	0.036	1.3625	6.53926
1	WT	IAA10nM	525	6	22	channel1:WT_NAA10nM_T0022_00014_CH4	3.265	1.031	3.115	72.548	0.697	0.073	2.15	13.2602
1	WT	IAA10nM	550	6	23	channel1:WT_NAA10nM_T0023_00014_CH4	3.291	0.979	3.125	71.737	0.697	0.099	2.35	17.983
1	WT	IAA10nM	575	6	24	channel1:WT_NAA10nM_T0024_00014_CH4	3.281	0.99	3.125	72.255	0.693	0.089	2.35	16.1665
1	WT	IAA10nM	600	6	25	channel1:WT_NAA10nM_T0025_00014_CH4	3.291	0.979	3.125	71.737	0.694	0.099	2.1875	17.983
1	WT	IAA10nM	625	6	26	channel1:WT_NAA10nM_T0026_00014_CH4	3.268	0.969	3.104	71.796	0.693	0.076	2	13.8051
1	WT	IAA10nM	650	6	27	channel1:WT_NAA10nM_T0027_00014_CH4	3.276	0.979	3.135	73.179	0.704	0.084	2.0625	15.2583
1	WT	IAA10nM	675	6	28	channel1:WT_NAA10nM_T0028_00014_CH4	3.273	0.99	3.135	73.353	0.689	0.081	2.1625	14.7133
1	WT	IAA10nM	700	6	29	channel1:WT_NAA10nM_T0029_00014_CH4	3.284	0.99	3.125	72.082	0.689	0.092	2.35	16.7114
1	WT	IAA10nM	725	6	30	channel1:WT_NAA10nM_T0030_00014_CH4	3.288	0.99	3.125	71.91	0.69	0.096	2.3125	17.438
1	WT	IAA10nM	750	6	31	channel1:WT_NAA10nM_T0031_00014_CH4	3.281	0.99	3.125	72.255	0.69	0.089	2.35	16.1665
1	WT	IAA10nM	775	6	32	channel1:WT_NAA10nM_T0032_00014_CH4	3.291	0.979	3.125	71.737	0.702	0.099	2.2375	17.983
1	WT	IAA10nM	800	6	33	channel1:WT_NAA10nM_T0033_00014_CH4	3.272	1	3.125	72.777	0.697	0.08	1.975	14.5317
1	WT	IAA10nM	825	6	34	channel1:WT_NAA10nM_T0034_00014_CH4	3.27	1	3.135	73.528	0.699	0.078	1.65	14.1684
1	WT	IAA10nM	850	6	35	channel1:WT_NAA10nM_T0035_00014_CH4	3.246	0.979	3.104	73.019	0.684	0.054	1.5	9.80889
1	WT	IAA10nM	875	6	36	channel1:WT_NAA10nM_T0036_00014_CH4	3.258	0.979	3.104	72.318	0.689	0.066	1.6625	11.9886
1	WT	IAA10nM	900	6	37	channel1:WT_NAA10nM_T0037_00014_CH4	3.259	1.031	3.115	72.897	0.698	0.067	1.8875	12.1703
1	WT	IAA10nM	925	6	38	channel1:WT_NAA10nM_T0038_00014_CH4	3.276	1.042	3.135	73.179	0.688	0.084	2.425	15.2583
1	WT	IAA10nM	950	6	39	channel1:WT_NAA10nM_T0039_00014_CH4	3.302	1	3.156	72.937	0.697	0.11	2.4625	19.9811
1	WT	IAA10nM	975	6	40	channel1:WT_NAA10nM_T0040_00014_CH4	3.279	1.042	3.135	73.004	0.701	0.087	2.4625	15.8032
1	WT	IAA10nM	1000	6	41	channel1:WT_NAA10nM_T0041_00014_CH4	3.302	1.021	3.156	72.937	0.7	0.11	2.5	19.9811
1	WT	IAA10nM	1025	6	42	channel1:WT_NAA10nM_T0042_00014_CH4	3.282	1.021	3.135	72.83	0.686	0.09	2.45	16.3482
1	WT	IAA10nM	1050	6	43	channel1:WT_NAA10nM_T0043_00014_CH4	3.298	1	3.146	72.538	0.698	0.106	2.475	19.2545
1	WT	IAA10nM	1075	6	44	channel1:WT_NAA10nM_T0044_00014_CH4	3.284	1.021	3.156	73.98	0.698	0.092	2.525	16.7114
1	WT	IAA10nM	1100	6	45	channel1:WT_NAA10nM_T0045_00014_CH4	3.302	1.021	3.156	72.937	0.698	0.11	2.625	19.9811
1	WT	IAA10nM	1125	6	46	channel1:WT_NAA10nM_T0046_00014_CH4	3.292	1.021	3.146	72.884	0.698	0.1	2.7375	18.1646
1	WT	IAA10nM	1150	6	47	channel1:WT_NAA10nM_T0047_00014_CH4	3.311	1.01	3.156	72.42	0.698	0.119	3.1	21.6159
1	WT	IAA10nM	1175	6	48	channel1:WT_NAA10nM_T0048_00014_CH4	3.321	1.021	3.177	73.043	0.693	0.129	3.35	23.4324
1	WT	IAA10nM	1200	6	49	channel1:WT_NAA10nM_T0049_00014_CH4	3.331	1.01	3.177	72.528	0.693	0.139	3.475	25.2488
1	WT	IAA10nM	1225	6	50	channel1:WT_NAA10nM_T0050_00014_CH4	3.331	1.01	3.177	72.528	0.698	0.139	86.6125	25.2488
1	WT	IAA10nM	0	7	1	channel1-1:WT_NAA10nM_T0001_00014_CH4	2.26	1.708	0	102.242	0.674	0	0.0875	0
1	WT	IAA10nM	25	7	2	channel1-1:WT_NAA10nM_T0002_00014_CH4	2.267	1.667	0	103.014	0.668	0.007	0.175	1.27152
1	WT	IAA10nM	50	7	3	channel1-1:WT_NAA10nM_T0003_00014_CH4	2.267	1.667	0	103.014	0.662	0.007	0.2	1.27152
1	WT	IAA10nM	75	7	4	channel1-1:WT_NAA10nM_T0004_00014_CH4	2.269	1.656	0	103.271	0.652	0.009	0.1875	1.63482
1	WT	IAA10nM	100	7	5	channel1-1:WT_NAA10nM_T0005_00014_CH4	2.266	1.677	0	101.672	0.635	0.006	0.05	1.08988
1	WT	IAA10nM	125	7	6	channel1-1:WT_NAA10nM_T0006_00014_CH4	2.258	1.708	0	100.636	0.646	-0.002	0.025	-0.363292
1	WT	IAA10nM	150	7	7	channel1-1:WT_NAA10nM_T0007_00014_CH4	2.264	1.667	0	101.413	0.644	0.004	0.125	0.726585
1	WT	IAA10nM	175	7	8	channel1-1:WT_NAA10nM_T0008_00014_CH4	2.266	1.708	0	100.328	0.645	0.006	0.075	1.08988
1	WT	IAA10nM	200	7	9	channel1-1:WT_NAA10nM_T0009_00014_CH4	2.26	1.74	0	99.549	0.641	0	0.175	0
1	WT	IAA10nM	225	7	10	channel1-1:WT_NAA10nM_T0010_00014_CH4	2.274	1.729	2.219	77.3	0.636	0.014	0.75	2.54305
1	WT	IAA10nM	250	7	11	channel1-1:WT_NAA10nM_T0011_00014_CH4	2.306	1.76	2.26	78.538	0.634	0.046	1.0375	8.35572
1	WT	IAA10nM	275	7	12	channel1-1:WT_NAA10nM_T0012_00014_CH4	2.297	1.719	2.24	77.161	0.634	0.037	0.9	6.72091
1	WT	IAA10nM	300	7	13	channel1-1:WT_NAA10nM_T0013_00014_CH4	2.295	1.729	2.24	77.415	0.634	0.035	0.7375	6.35762
1	WT	IAA10nM	325	7	14	channel1-1:WT_NAA10nM_T0014_00014_CH4	2.284	1.781	2.24	78.69	0.635	0.024	0.6	4.35951
1	WT	IAA10nM	350	7	15	channel1-1:WT_NAA10nM_T0015_00014_CH4	2.284	1.781	2.24	78.69	0.635	0.024	0.9875	4.35951
1	WT	IAA10nM	375	7	16	channel1-1:WT_NAA10nM_T0016_00014_CH4	2.315	1.771	2.271	78.842	0.635	0.055	1.475	9.99054
1	WT	IAA10nM	400	7	17	channel1-1:WT_NAA10nM_T0017_00014_CH4	2.323	1.729	2.271	77.833	0.635	0.063	1.475	11.4437
1	WT	IAA10nM	425	7	18	channel1-1:WT_NAA10nM_T0018_00014_CH4	2.315	1.771	2.271	78.842	0.635	0.055	1.1875	9.99054
1	WT	IAA10nM	450	7	19	channel1-1:WT_NAA10nM_T0019_00014_CH4	2.3	1.781	2.26	79.301	0.635	0.04	1	7.26585
1	WT	IAA10nM	475	7	20	channel1-1:WT_NAA10nM_T0020_00014_CH4	2.3	1.74	2.25	77.978	0.634	0.04	1.2125	7.26585
1	WT	IAA10nM	500	7	21	channel1-1:WT_NAA10nM_T0021_00014_CH4	2.317	1.76	2.271	78.589	0.626	0.057	1.2625	10.3538
1	WT	IAA10nM	525	7	22	channel1-1:WT_NAA10nM_T0022_00014_CH4	2.304	1.76	2.26	78.792	0.631	0.044	1.1875	7.99243
1	WT	IAA10nM	550	7	23	channel1-1:WT_NAA10nM_T0023_00014_CH4	2.311	1.781	2.271	79.349	0.626	0.051	1.275	9.26395
1	WT	IAA10nM	575	7	24	channel1-1:WT_NAA10nM_T0024_00014_CH4	2.311	1.781	2.271	79.349	0.626	0.051	1.325	9.26395
1	WT	IAA10nM	600	7	25	channel1-1:WT_NAA10nM_T0025_00014_CH4	2.315	1.76	2.271	78.842	0.626	0.055	1.1875	9.99054
1	WT	IAA10nM	625	7	26	channel1-1:WT_NAA10nM_T0026_00014_CH4	2.3	1.781	2.271	80.879	0.627	0.04	1.0625	7.26585
1	WT	IAA10nM	650	7	27	channel1-1:WT_NAA10nM_T0027_00014_CH4	2.305	1.75	2.271	80.112	0.627	0.045	1.35	8.17408
1	WT	IAA10nM	675	7	28	channel1-1:WT_NAA10nM_T0028_00014_CH4	2.323	1.771	2.281	79.144	0.627	0.063	1.625	11.4437
1	WT	IAA10nM	700	7	29	channel1-1:WT_NAA10nM_T0029_00014_CH4	2.327	1.75	2.281	78.64	0.627	0.067	1.75	12.1703
1	WT	IAA10nM	725	7	30	channel1-1:WT_NAA10nM_T0030_00014_CH4	2.333	1.771	2.292	79.192	0.631	0.073	1.75	13.2602
1	WT	IAA10nM	750	7	31	channel1-1:WT_NAA10nM_T0031_00014_CH4	2.327	1.75	2.281	78.64	0.627	0.067	1.7375	12.1703
1	WT	IAA10nM	775	7	32	channel1-1:WT_NAA10nM_T0032_00014_CH4	2.332	1.781	2.302	80.748	0.629	0.072	1.9125	13.0785
1	WT	IAA10nM	800	7	33	channel1-1:WT_NAA10nM_T0033_00014_CH4	2.341	1.854	2.323	82.843	0.627	0.081	2.0625	14.7133
1	WT	IAA10nM	825	7	34	channel1-1:WT_NAA10nM_T0034_00014_CH4	2.344	1.76	2.312	80.538	0.626	0.084	1.9375	15.2583
1	WT	IAA10nM	850	7	35	channel1-1:WT_NAA10nM_T0035_00014_CH4	2.331	1.792	2.302	81.001	0.626	0.071	1.875	12.8969
1	WT	IAA10nM	875	7	36	channel1-1:WT_NAA10nM_T0036_00014_CH4	2.339	1.781	2.302	79.741	0.626	0.079	2.325	14.35
1	WT	IAA10nM	900	7	37	channel1-1:WT_NAA10nM_T0037_00014_CH4	2.367	1.865	2.344	81.906	0.626	0.107	2.35	19.4361
1	WT	IAA10nM	925	7	38	channel1-1:WT_NAA10nM_T0038_00014_CH4	2.341	1.771	2.302	79.49	0.626	0.081	2.2375	14.7133
1	WT	IAA10nM	950	7	39	channel1-1:WT_NAA10nM_T0039_00014_CH4	2.358	1.792	2.323	80.08	0.633	0.098	2.5875	17.8013
1	WT	IAA10nM	975	7	40	channel1-1:WT_NAA10nM_T0040_00014_CH4	2.369	1.854	2.344	81.656	0.626	0.109	2.6375	19.7994
1	WT	IAA10nM	1000	7	41	channel1-1:WT_NAA10nM_T0041_00014_CH4	2.362	1.781	2.323	79.582	0.633	0.102	2.4625	18.5279
1	WT	IAA10nM	1025	7	42	channel1-1:WT_NAA10nM_T0042_00014_CH4	2.355	1.771	2.323	80.579	0.633	0.095	2.6875	17.2564
1	WT	IAA10nM	1050	7	43	channel1-1:WT_NAA10nM_T0043_00014_CH4	2.38	1.792	2.344	79.919	0.633	0.12	3	21.7975
1	WT	IAA10nM	1075	7	44	channel1-1:WT_NAA10nM_T0044_00014_CH4	2.38	1.781	2.344	79.919	0.626	0.12	3.0625	21.7975
1	WT	IAA10nM	1100	7	45	channel1-1:WT_NAA10nM_T0045_00014_CH4	2.385	1.896	2.365	82.471	0.632	0.125	3.325	22.7058
1	WT	IAA10nM	1125	7	46	channel1-1:WT_NAA10nM_T0046_00014_CH4	2.401	1.781	2.365	80.006	0.626	0.141	3.575	25.6121
1	WT	IAA10nM	1150	7	47	channel1-1:WT_NAA10nM_T0047_00014_CH4	2.405	1.771	2.365	79.518	0.626	0.145	3.275	26.3387
1	WT	IAA10nM	1175	7	48	channel1-1:WT_NAA10nM_T0048_00014_CH4	2.377	1.792	2.344	80.414	0.627	0.117	3.0125	21.2526
1	WT	IAA10nM	1200	7	49	channel1-1:WT_NAA10nM_T0049_00014_CH4	2.384	1.656	0	97.28	0.633	0.124	3.525	22.5241
1	WT	IAA10nM	1225	7	50	channel1-1:WT_NAA10nM_T0050_00014_CH4	2.418	1.802	2.385	80.578	0.625	0.158	75.825	28.7001
1	WT	IAA10nM	0	8	1	channel1:WT_NAA10nM_T0001_00015_CH4	2.958	0.219	2.896	78.215	0.648	0	-0.05	0
1	WT	IAA10nM	25	8	2	channel1:WT_NAA10nM_T0002_00015_CH4	2.954	0.167	2.896	78.611	0.644	-0.004	-0.05	-0.726585
1	WT	IAA10nM	50	8	3	channel1:WT_NAA10nM_T0003_00015_CH4	2.958	0.208	2.906	79.244	0.647	0	0.05	0
1	WT	IAA10nM	75	8	4	channel1:WT_NAA10nM_T0004_00015_CH4	2.962	0.188	2.906	78.848	0.651	0.004	0.125	0.726585
1	WT	IAA10nM	100	8	5	channel1:WT_NAA10nM_T0005_00015_CH4	2.964	0.177	2.906	78.651	0.653	0.006	0.225	1.08988
1	WT	IAA10nM	125	8	6	channel1:WT_NAA10nM_T0006_00015_CH4	2.97	0.198	2.917	79.084	0.654	0.012	0.3875	2.17975
1	WT	IAA10nM	150	8	7	channel1:WT_NAA10nM_T0007_00015_CH4	2.977	0.208	2.927	79.516	0.649	0.019	0.4125	3.45128
1	WT	IAA10nM	175	8	8	channel1:WT_NAA10nM_T0008_00015_CH4	2.972	0.188	2.917	78.887	0.648	0.014	0.375	2.54305
1	WT	IAA10nM	200	8	9	channel1:WT_NAA10nM_T0009_00015_CH4	2.974	0.177	2.917	78.69	0.647	0.016	0.4	2.90634
1	WT	IAA10nM	225	8	10	channel1:WT_NAA10nM_T0010_00015_CH4	2.974	0.177	2.917	78.69	0.642	0.016	0.5375	2.90634
1	WT	IAA10nM	250	8	11	channel1:WT_NAA10nM_T0011_00015_CH4	2.985	0.177	2.927	78.729	0.652	0.027	0.7	4.90445
1	WT	IAA10nM	275	8	12	channel1:WT_NAA10nM_T0012_00015_CH4	2.987	0.208	2.938	79.552	0.651	0.029	0.625	5.26774
1	WT	IAA10nM	300	8	13	channel1:WT_NAA10nM_T0013_00015_CH4	2.979	0.198	2.927	79.319	0.646	0.021	0.55	3.81457
1	WT	IAA10nM	325	8	14	channel1:WT_NAA10nM_T0014_00015_CH4	2.981	0.177	2.927	79.122	0.645	0.023	0.675	4.17786
1	WT	IAA10nM	350	8	15	channel1:WT_NAA10nM_T0015_00015_CH4	2.989	0.208	2.938	79.356	0.645	0.031	0.625	5.63103
1	WT	IAA10nM	375	8	16	channel1:WT_NAA10nM_T0016_00015_CH4	2.977	0.208	2.927	79.516	0.651	0.019	0.4375	3.45128
1	WT	IAA10nM	400	8	17	channel1:WT_NAA10nM_T0017_00015_CH4	2.974	0.177	2.917	78.69	0.65	0.016	0.4375	2.90634
1	WT	IAA10nM	425	8	18	channel1:WT_NAA10nM_T0018_00015_CH4	2.977	0.188	2.927	79.516	0.65	0.019	0.5	3.45128
1	WT	IAA10nM	450	8	19	channel1:WT_NAA10nM_T0019_00015_CH4	2.979	0.198	2.927	79.319	0.648	0.021	0.4375	3.81457
1	WT	IAA10nM	475	8	20	channel1:WT_NAA10nM_T0020_00015_CH4	2.972	0.177	2.917	78.887	0.648	0.014	0.3375	2.54305
1	WT	IAA10nM	500	8	21	channel1:WT_NAA10nM_T0021_00015_CH4	2.971	0.198	2.927	80.108	0.65	0.013	0.675	2.3614
1	WT	IAA10nM	525	8	22	channel1:WT_NAA10nM_T0022_00015_CH4	2.999	0.188	2.948	79.393	0.653	0.041	0.925	7.44749
1	WT	IAA10nM	550	8	23	channel1:WT_NAA10nM_T0023_00015_CH4	2.991	0.167	2.938	79.16	0.652	0.033	0.75	5.99432
1	WT	IAA10nM	575	8	24	channel1:WT_NAA10nM_T0024_00015_CH4	2.985	0.177	2.927	78.729	0.647	0.027	0.675	4.90445
1	WT	IAA10nM	600	8	25	channel1:WT_NAA10nM_T0025_00015_CH4	2.985	0.177	2.927	78.729	0.647	0.027	0.675	4.90445
1	WT	IAA10nM	625	8	26	channel1:WT_NAA10nM_T0026_00015_CH4	2.985	0.177	2.927	78.729	0.653	0.027	0.9	4.90445
1	WT	IAA10nM	650	8	27	channel1:WT_NAA10nM_T0027_00015_CH4	3.003	0.188	2.948	79.002	0.654	0.045	1.2	8.17408
1	WT	IAA10nM	675	8	28	channel1:WT_NAA10nM_T0028_00015_CH4	3.009	0.208	2.958	79.429	0.654	0.051	1.2	9.26395
1	WT	IAA10nM	700	8	29	channel1:WT_NAA10nM_T0029_00015_CH4	3.003	0.188	2.948	79.002	0.652	0.045	1.2	8.17408
1	WT	IAA10nM	725	8	30	channel1:WT_NAA10nM_T0030_00015_CH4	3.009	0.198	2.958	79.429	0.646	0.051	1.25	9.26395
1	WT	IAA10nM	750	8	31	channel1:WT_NAA10nM_T0031_00015_CH4	3.007	0.167	2.948	78.612	0.652	0.049	1.2375	8.90066
1	WT	IAA10nM	775	8	32	channel1:WT_NAA10nM_T0032_00015_CH4	3.008	0.198	2.958	79.624	0.653	0.05	1.0875	9.08231
1	WT	IAA10nM	800	8	33	channel1:WT_NAA10nM_T0033_00015_CH4	2.995	0.177	2.938	78.768	0.646	0.037	1.2375	6.72091
1	WT	IAA10nM	825	8	34	channel1:WT_NAA10nM_T0034_00015_CH4	3.02	0.208	2.969	79.465	0.649	0.062	1.4375	11.2621
1	WT	IAA10nM	850	8	35	channel1:WT_NAA10nM_T0035_00015_CH4	3.011	0.208	2.969	80.44	0.652	0.053	1.125	9.62725
1	WT	IAA10nM	875	8	36	channel1:WT_NAA10nM_T0036_00015_CH4	2.995	0.188	2.948	79.784	0.648	0.037	1.1875	6.72091
1	WT	IAA10nM	900	8	37	channel1:WT_NAA10nM_T0037_00015_CH4	3.016	0.219	2.969	79.854	0.645	0.058	1.3875	10.5355
1	WT	IAA10nM	925	8	38	channel1:WT_NAA10nM_T0038_00015_CH4	3.011	0.156	2.958	79.234	0.652	0.053	1.4875	9.62725
1	WT	IAA10nM	950	8	39	channel1:WT_NAA10nM_T0039_00015_CH4	3.024	0.188	2.969	79.077	0.653	0.066	1.625	11.9886
1	WT	IAA10nM	975	8	40	channel1:WT_NAA10nM_T0040_00015_CH4	3.022	0.188	2.969	79.271	0.652	0.064	1.5125	11.6254
1	WT	IAA10nM	1000	8	41	channel1:WT_NAA10nM_T0041_00015_CH4	3.015	0.167	2.958	78.845	0.653	0.057	1.425	10.3538
1	WT	IAA10nM	1025	8	42	channel1:WT_NAA10nM_T0042_00015_CH4	3.015	0.167	2.958	78.845	0.65	0.057	1.4	10.3538
1	WT	IAA10nM	1050	8	43	channel1:WT_NAA10nM_T0043_00015_CH4	3.013	0.177	2.958	79.04	0.65	0.055	1.375	9.99054
1	WT	IAA10nM	1075	8	44	channel1:WT_NAA10nM_T0044_00015_CH4	3.013	0.177	2.958	79.04	0.652	0.055	1.375	9.99054
1	WT	IAA10nM	1100	8	45	channel1:WT_NAA10nM_T0045_00015_CH4	3.013	0.177	2.958	79.04	0.646	0.055	1.3125	9.99054
1	WT	IAA10nM	1125	8	46	channel1:WT_NAA10nM_T0046_00015_CH4	3.008	0.177	2.958	79.624	0.65	0.05	1.5	9.08231
1	WT	IAA10nM	1150	8	47	channel1:WT_NAA10nM_T0047_00015_CH4	3.028	0.167	2.969	78.69	0.652	0.07	1.5625	12.7152
1	WT	IAA10nM	1175	8	48	channel1:WT_NAA10nM_T0048_00015_CH4	3.013	0.177	2.958	79.04	0.65	0.055	1.6125	9.99054
1	WT	IAA10nM	1200	8	49	channel1:WT_NAA10nM_T0049_00015_CH4	3.032	0.188	2.979	79.308	0.652	0.074	1.925	13.4418
1	WT	IAA10nM	1225	8	50	channel1:WT_NAA10nM_T0050_00015_CH4	3.038	0.208	2.99	79.73	0.651	0.08	44	14.5317
1	WT	IAA10nM	0	9	51	channel1:WT_NAA10nM_T0001_00016_CH4	2.578	0.292	0	98.13	0.634	0	-0.3125	0
1	WT	IAA10nM	25	9	52	channel1:WT_NAA10nM_T0002_00016_CH4	2.553	0.354	0	97.502	0.631	-0.025	-0.4	-4.54115
1	WT	IAA10nM	50	9	53	channel1:WT_NAA10nM_T0003_00016_CH4	2.571	0.344	0	96.981	0.632	-0.007	-0.2375	-1.27152
1	WT	IAA10nM	75	9	54	channel1:WT_NAA10nM_T0004_00016_CH4	2.566	0.344	0	97.933	0.619	-0.012	-0.2	-2.17975
1	WT	IAA10nM	100	9	55	channel1:WT_NAA10nM_T0005_00016_CH4	2.574	0.354	0	97.441	0.612	-0.004	-0.0625	-0.726585
1	WT	IAA10nM	125	9	56	channel1:WT_NAA10nM_T0006_00016_CH4	2.577	0.344	0	97.901	0.632	-0.001	5.55112e-15	-0.181646
1	WT	IAA10nM	150	9	57	channel1:WT_NAA10nM_T0007_00016_CH4	2.579	0.26	0.01	99.767	0.631	0.001	0.2875	0.181646
1	WT	IAA10nM	175	9	58	channel1:WT_NAA10nM_T0008_00016_CH4	2.6	0.25	0	99.689	0.624	0.022	0.3375	3.99622
1	WT	IAA10nM	200	9	59	channel1:WT_NAA10nM_T0009_00016_CH4	2.583	0.333	0	97.182	0.623	0.005	0.175	0.908231
1	WT	IAA10nM	225	9	60	channel1:WT_NAA10nM_T0010_00016_CH4	2.587	0.333	0	97.869	0.625	0.009	0.225	1.63482
1	WT	IAA10nM	250	9	61	channel1:WT_NAA10nM_T0011_00016_CH4	2.587	0.333	0	97.869	0.625	0.009	0.3	1.63482
1	WT	IAA10nM	275	9	62	channel1:WT_NAA10nM_T0012_00016_CH4	2.593	0.333	0	97.154	0.624	0.015	0.6625	2.72469
1	WT	IAA10nM	300	9	63	channel1:WT_NAA10nM_T0013_00016_CH4	2.616	0.333	0	97.549	0.631	0.038	0.7875	6.90255
1	WT	IAA10nM	325	9	64	channel1:WT_NAA10nM_T0014_00016_CH4	2.603	0.333	0	97.125	0.629	0.025	0.7125	4.54115
1	WT	IAA10nM	350	9	65	channel1:WT_NAA10nM_T0015_00016_CH4	2.61	0.26	0	99.65	0.634	0.032	0.825	5.81268
1	WT	IAA10nM	375	9	66	channel1:WT_NAA10nM_T0016_00016_CH4	2.612	0.25	0	99.876	0.623	0.034	0.8	6.17597
1	WT	IAA10nM	400	9	67	channel1:WT_NAA10nM_T0017_00016_CH4	2.608	0.26	0	99.425	0.622	0.03	0.775	5.44939
1	WT	IAA10nM	425	9	68	channel1:WT_NAA10nM_T0018_00016_CH4	2.61	0.26	0	99.65	0.625	0.032	0.8875	5.81268
1	WT	IAA10nM	450	9	69	channel1:WT_NAA10nM_T0019_00016_CH4	2.617	0.229	0	99.162	0.638	0.039	1.0125	7.0842
1	WT	IAA10nM	475	9	70	channel1:WT_NAA10nM_T0020_00016_CH4	2.62	0.24	0	99.612	0.641	0.042	1.2	7.62914
1	WT	IAA10nM	500	9	71	channel1:WT_NAA10nM_T0021_00016_CH4	2.632	0.219	0	99.798	0.639	0.054	1.35	9.80889
1	WT	IAA10nM	525	9	72	channel1:WT_NAA10nM_T0022_00016_CH4	2.632	0.219	0	99.798	0.629	0.054	1.2875	9.80889
1	WT	IAA10nM	550	9	73	channel1:WT_NAA10nM_T0023_00016_CH4	2.627	0.229	0	99.126	0.639	0.049	1.225	8.90066
1	WT	IAA10nM	575	9	74	channel1:WT_NAA10nM_T0024_00016_CH4	2.627	0.208	0	100.508	0.641	0.049	1.25	8.90066
1	WT	IAA10nM	600	9	75	channel1:WT_NAA10nM_T0025_00016_CH4	2.629	0.25	0	99.35	0.627	0.051	1.175	9.26395
1	WT	IAA10nM	625	9	76	channel1:WT_NAA10nM_T0026_00016_CH4	2.621	0.323	0	98.227	0.617	0.043	1.2125	7.81079
1	WT	IAA10nM	650	9	77	channel1:WT_NAA10nM_T0027_00016_CH4	2.632	0.229	0	99.798	0.626	0.054	1.35	9.80889
1	WT	IAA10nM	675	9	78	channel1:WT_NAA10nM_T0028_00016_CH4	2.632	0.25	0	99.798	0.609	0.054	1.325	9.80889
1	WT	IAA10nM	700	9	79	channel1:WT_NAA10nM_T0029_00016_CH4	2.63	0.25	0	99.574	0.61	0.052	1.2875	9.4456
1	WT	IAA10nM	725	9	80	channel1:WT_NAA10nM_T0030_00016_CH4	2.629	0.271	0	99.35	0.613	0.051	1.3625	9.26395
1	WT	IAA10nM	750	9	81	channel1:WT_NAA10nM_T0031_00016_CH4	2.636	0.312	0	97.265	0.619	0.058	1.4875	10.5355
1	WT	IAA10nM	775	9	82	channel1:WT_NAA10nM_T0032_00016_CH4	2.639	0.25	0	99.314	0.618	0.061	1.55	11.0804
1	WT	IAA10nM	800	9	83	channel1:WT_NAA10nM_T0033_00016_CH4	2.641	0.25	0	99.537	0.643	0.063	1.55	11.4437
1	WT	IAA10nM	825	9	84	channel1:WT_NAA10nM_T0034_00016_CH4	2.639	0.26	0	99.314	0.625	0.061	1.6375	11.0804
1	WT	IAA10nM	850	9	85	channel1:WT_NAA10nM_T0035_00016_CH4	2.648	0.24	0	99.055	0.627	0.07	1.7625	12.7152
1	WT	IAA10nM	875	9	86	channel1:WT_NAA10nM_T0036_00016_CH4	2.649	0.271	0	99.277	0.633	0.071	1.825	12.8969
1	WT	IAA10nM	900	9	87	channel1:WT_NAA10nM_T0037_00016_CH4	2.653	0.25	0	99.721	0.644	0.075	1.8875	13.6235
1	WT	IAA10nM	925	9	88	channel1:WT_NAA10nM_T0038_00016_CH4	2.654	0.229	0	99.943	0.645	0.076	1.8625	13.8051
1	WT	IAA10nM	950	9	89	channel1:WT_NAA10nM_T0039_00016_CH4	2.651	0.25	0	99.499	0.644	0.073	1.85	13.2602
1	WT	IAA10nM	975	9	90	channel1:WT_NAA10nM_T0040_00016_CH4	2.653	0.25	0	99.721	0.636	0.075	1.9125	13.6235
1	WT	IAA10nM	1000	9	91	channel1:WT_NAA10nM_T0041_00016_CH4	2.656	0.25	0	98.797	0.651	0.078	1.95	14.1684
1	WT	IAA10nM	1025	9	92	channel1:WT_NAA10nM_T0042_00016_CH4	2.656	0.25	0	98.797	0.646	0.078	1.9375	14.1684
1	WT	IAA10nM	1050	9	93	channel1:WT_NAA10nM_T0043_00016_CH4	2.655	0.25	0	98.575	0.633	0.077	2.05	13.9868
1	WT	IAA10nM	1075	9	94	channel1:WT_NAA10nM_T0044_00016_CH4	2.665	0.24	0	99.904	0.63	0.087	2.2375	15.8032
1	WT	IAA10nM	1100	9	95	channel1:WT_NAA10nM_T0045_00016_CH4	2.67	0.229	0	99.205	0.654	0.092	2.3375	16.7114
1	WT	IAA10nM	1125	9	96	channel1:WT_NAA10nM_T0046_00016_CH4	2.673	0.208	0	99.646	0.668	0.095	2.4875	17.2564
1	WT	IAA10nM	1150	9	97	channel1:WT_NAA10nM_T0047_00016_CH4	2.682	0.219	0	99.389	0.633	0.104	2.6625	18.8912
1	WT	IAA10nM	1175	9	98	channel1:WT_NAA10nM_T0048_00016_CH4	2.687	0.208	0	100.047	0.632	0.109	2.6	19.7994
1	WT	IAA10nM	1200	9	99	channel1:WT_NAA10nM_T0049_00016_CH4	2.677	0.25	0	98.729	0.615	0.099	2.55	17.983
1	WT	IAA10nM	1225	9	100	channel1:WT_NAA10nM_T0050_00016_CH4	2.683	0.25	0	99.609	0.626	0.105	58.7375	19.0728
1	WT	IAA10nM	0	10	1	channel1:WT_NAA10nM_T0001_00002_CH4	3.583	0.375	0	101.571	0.7	0	0.025	0
1	WT	IAA10nM	25	10	2	channel1:WT_NAA10nM_T0002_00002_CH4	3.585	0.385	0	101.734	0.699	0.002	-0.025	0.363292
1	WT	IAA10nM	50	10	3	channel1:WT_NAA10nM_T0003_00002_CH4	3.579	0.396	0	102.095	0.694	-0.004	0.1125	-0.726585
1	WT	IAA10nM	75	10	4	channel1:WT_NAA10nM_T0004_00002_CH4	3.596	0.406	0	101.701	0.704	0.013	0.2875	2.3614
1	WT	IAA10nM	100	10	5	channel1:WT_NAA10nM_T0005_00002_CH4	3.593	0.406	0	101.538	0.701	0.01	0.4625	1.81646
1	WT	IAA10nM	125	10	6	channel1:WT_NAA10nM_T0006_00002_CH4	3.61	0.406	0	101.991	0.701	0.027	0.525	4.90445
1	WT	IAA10nM	150	10	7	channel1:WT_NAA10nM_T0007_00002_CH4	3.598	0.406	0	101.863	0.707	0.015	0.775	2.72469
1	WT	IAA10nM	175	10	8	channel1:WT_NAA10nM_T0008_00002_CH4	3.63	0.406	0	101.923	0.702	0.047	1.1125	8.53737
1	WT	IAA10nM	200	10	9	channel1:WT_NAA10nM_T0009_00002_CH4	3.625	0.396	0	102.279	0.699	0.042	1.0125	7.62914
1	WT	IAA10nM	225	10	10	channel1:WT_NAA10nM_T0010_00002_CH4	3.622	0.396	0	102.118	0.705	0.039	0.975	7.0842
1	WT	IAA10nM	250	10	11	channel1:WT_NAA10nM_T0011_00002_CH4	3.622	0.406	0	102.118	0.703	0.039	1.0125	7.0842
1	WT	IAA10nM	275	10	12	channel1:WT_NAA10nM_T0012_00002_CH4	3.625	0.396	0	102.279	0.703	0.042	1.05	7.62914
1	WT	IAA10nM	300	10	13	channel1:WT_NAA10nM_T0013_00002_CH4	3.625	0.396	0	102.279	0.709	0.042	1.15	7.62914
1	WT	IAA10nM	325	10	14	channel1:WT_NAA10nM_T0014_00002_CH4	3.633	0.396	0	102.083	0.706	0.05	1.275	9.08231
1	WT	IAA10nM	350	10	15	channel1:WT_NAA10nM_T0015_00002_CH4	3.635	0.396	0	102.244	0.708	0.052	1.0125	9.4456
1	WT	IAA10nM	375	10	16	channel1:WT_NAA10nM_T0016_00002_CH4	3.612	0.417	0	102.152	0.702	0.029	0.725	5.26774
1	WT	IAA10nM	400	10	17	channel1:WT_NAA10nM_T0017_00002_CH4	3.612	0.417	0	102.152	0.7	0.029	0.825	5.26774
1	WT	IAA10nM	425	10	18	channel1:WT_NAA10nM_T0018_00002_CH4	3.62	0.427	0	101.957	0.703	0.037	1.05	6.72091
1	WT	IAA10nM	450	10	19	channel1:WT_NAA10nM_T0019_00002_CH4	3.63	0.417	0	101.923	0.701	0.047	1.05	8.53737
1	WT	IAA10nM	475	10	20	channel1:WT_NAA10nM_T0020_00002_CH4	3.62	0.417	0	101.957	0.701	0.037	1.2125	6.72091
1	WT	IAA10nM	500	10	21	channel1:WT_NAA10nM_T0021_00002_CH4	3.643	0.406	0	102.049	0.703	0.06	1.3375	10.8988
1	WT	IAA10nM	525	10	22	channel1:WT_NAA10nM_T0022_00002_CH4	3.63	0.417	0	101.923	0.7	0.047	1.2625	8.53737
1	WT	IAA10nM	550	10	23	channel1:WT_NAA10nM_T0023_00002_CH4	3.637	0.396	0	102.404	0.706	0.054	1.2	9.80889
1	WT	IAA10nM	575	10	24	channel1:WT_NAA10nM_T0024_00002_CH4	3.625	0.406	0	102.279	0.705	0.042	1.175	7.62914
1	WT	IAA10nM	600	10	25	channel1:WT_NAA10nM_T0025_00002_CH4	3.635	0.417	0	102.244	0.704	0.052	1.325	9.4456
1	WT	IAA10nM	625	10	26	channel1:WT_NAA10nM_T0026_00002_CH4	3.637	0.396	0	102.404	0.708	0.054	1.3	9.80889
1	WT	IAA10nM	650	10	27	channel1:WT_NAA10nM_T0027_00002_CH4	3.633	0.396	0	102.083	0.712	0.05	1.45	9.08231
1	WT	IAA10nM	675	10	28	channel1:WT_NAA10nM_T0028_00002_CH4	3.649	0.396	0	102.529	0.707	0.066	1.525	11.9886
1	WT	IAA10nM	700	10	29	channel1:WT_NAA10nM_T0029_00002_CH4	3.639	0.406	0	102.564	0.706	0.056	1.5	10.1722
1	WT	IAA10nM	725	10	30	channel1:WT_NAA10nM_T0030_00002_CH4	3.647	0.396	0	102.369	0.711	0.064	1.6	11.6254
1	WT	IAA10nM	750	10	31	channel1:WT_NAA10nM_T0031_00002_CH4	3.647	0.396	0	102.369	0.712	0.064	1.625	11.6254
1	WT	IAA10nM	775	10	32	channel1:WT_NAA10nM_T0032_00002_CH4	3.649	0.396	0	102.529	0.711	0.066	1.375	11.9886
1	WT	IAA10nM	800	10	33	channel1:WT_NAA10nM_T0033_00002_CH4	3.627	0.396	0	102.44	0.708	0.044	1.225	7.99243
1	WT	IAA10nM	825	10	34	channel1:WT_NAA10nM_T0034_00002_CH4	3.637	0.396	0	102.404	0.71	0.054	1.475	9.80889
1	WT	IAA10nM	850	10	35	channel1:WT_NAA10nM_T0035_00002_CH4	3.647	0.396	0	102.369	0.712	0.064	1.725	11.6254
1	WT	IAA10nM	875	10	36	channel1:WT_NAA10nM_T0036_00002_CH4	3.657	0.396	0	102.334	0.712	0.074	1.825	13.4418
1	WT	IAA10nM	900	10	37	channel1:WT_NAA10nM_T0037_00002_CH4	3.655	0.396	0	102.175	0.712	0.072	1.675	13.0785
1	WT	IAA10nM	925	10	38	channel1:WT_NAA10nM_T0038_00002_CH4	3.645	0.396	0	102.209	0.709	0.062	1.675	11.2621
1	WT	IAA10nM	950	10	39	channel1:WT_NAA10nM_T0039_00002_CH4	3.655	0.396	0	102.175	0.71	0.072	1.8	13.0785
1	WT	IAA10nM	975	10	40	channel1:WT_NAA10nM_T0040_00002_CH4	3.655	0.396	0	102.175	0.711	0.072	1.775	13.0785
1	WT	IAA10nM	1000	10	41	channel1:WT_NAA10nM_T0041_00002_CH4	3.653	0.406	0	102.015	0.712	0.07	1.775	12.7152
1	WT	IAA10nM	1025	10	42	channel1:WT_NAA10nM_T0042_00002_CH4	3.655	0.396	0	102.175	0.708	0.072	1.825	13.0785
1	WT	IAA10nM	1050	10	43	channel1:WT_NAA10nM_T0043_00002_CH4	3.657	0.396	0	102.334	0.708	0.074	1.8	13.4418
1	WT	IAA10nM	1075	10	44	channel1:WT_NAA10nM_T0044_00002_CH4	3.653	0.406	0	102.015	0.705	0.07	1.625	12.7152
1	WT	IAA10nM	1100	10	45	channel1:WT_NAA10nM_T0045_00002_CH4	3.643	0.417	0	102.049	0.706	0.06	1.6	10.8988
1	WT	IAA10nM	1125	10	46	channel1:WT_NAA10nM_T0046_00002_CH4	3.651	0.406	0	101.855	0.711	0.068	1.6	12.3519
1	WT	IAA10nM	1150	10	47	channel1:WT_NAA10nM_T0047_00002_CH4	3.643	0.417	0	102.049	0.711	0.06	1.65	10.8988
1	WT	IAA10nM	1175	10	48	channel1:WT_NAA10nM_T0048_00002_CH4	3.655	0.406	0	102.175	0.711	0.072	1.775	13.0785
1	WT	IAA10nM	1200	10	49	channel1:WT_NAA10nM_T0049_00002_CH4	3.653	0.417	0	102.015	0.711	0.07	1.9375	12.7152
1	WT	IAA10nM	1225	10	50	channel1:WT_NAA10nM_T0050_00002_CH4	3.668	0.396	0	102.299	0.711	0.085	61.0625	15.4399
1	WT	IAA10nM	0	11	1	channel1:WT_NAA10nM_T0001_00003_CH4	3.663	0.844	0	101.981	0.723	0	-0.075	0
1	WT	IAA10nM	25	11	2	channel1:WT_NAA10nM_T0002_00003_CH4	3.657	0.854	0	102.334	0.719	-0.006	0.1125	-1.08988
1	WT	IAA10nM	50	11	3	channel1:WT_NAA10nM_T0003_00003_CH4	3.678	0.854	0	102.265	0.721	0.015	0.725	2.72469
1	WT	IAA10nM	75	11	4	channel1:WT_NAA10nM_T0004_00003_CH4	3.706	0.865	0	102.005	0.719	0.043	0.975	7.81079
1	WT	IAA10nM	100	11	5	channel1:WT_NAA10nM_T0005_00003_CH4	3.698	0.917	0	101.373	0.721	0.035	1.025	6.35762
1	WT	IAA10nM	125	11	6	channel1:WT_NAA10nM_T0006_00003_CH4	3.71	0.865	0	102.319	0.725	0.047	1.15	8.53737
1	WT	IAA10nM	150	11	7	channel1:WT_NAA10nM_T0007_00003_CH4	3.708	0.865	0	102.162	0.725	0.045	1.1875	8.17408
1	WT	IAA10nM	175	11	8	channel1:WT_NAA10nM_T0008_00003_CH4	3.713	0.875	0	102.476	0.721	0.05	1.125	9.08231
1	WT	IAA10nM	200	11	9	channel1:WT_NAA10nM_T0009_00003_CH4	3.703	0.865	0	102.511	0.724	0.04	1.275	7.26585
1	WT	IAA10nM	225	11	10	channel1:WT_NAA10nM_T0010_00003_CH4	3.725	0.865	0	102.598	0.725	0.062	1.4625	11.2621
1	WT	IAA10nM	250	11	11	channel1:WT_NAA10nM_T0011_00003_CH4	3.718	0.865	0	102.128	0.724	0.055	1.3125	9.99054
1	WT	IAA10nM	275	11	12	channel1:WT_NAA10nM_T0012_00003_CH4	3.713	0.865	0	102.476	0.725	0.05	1.275	9.08231
1	WT	IAA10nM	300	11	13	channel1:WT_NAA10nM_T0013_00003_CH4	3.715	0.865	0	102.633	0.725	0.052	1.275	9.4456
1	WT	IAA10nM	325	11	14	channel1:WT_NAA10nM_T0014_00003_CH4	3.713	0.865	0	102.476	0.724	0.05	1.25	9.08231
1	WT	IAA10nM	350	11	15	channel1:WT_NAA10nM_T0015_00003_CH4	3.713	0.865	0	102.476	0.723	0.05	1.25	9.08231
1	WT	IAA10nM	375	11	16	channel1:WT_NAA10nM_T0016_00003_CH4	3.713	0.865	0	102.476	0.724	0.05	1.475	9.08231
1	WT	IAA10nM	400	11	17	channel1:WT_NAA10nM_T0017_00003_CH4	3.731	0.865	0	102.251	0.722	0.068	1.7	12.3519
1	WT	IAA10nM	425	11	18	channel1:WT_NAA10nM_T0018_00003_CH4	3.731	0.875	0	102.251	0.724	0.068	1.7	12.3519
1	WT	IAA10nM	450	11	19	channel1:WT_NAA10nM_T0019_00003_CH4	3.731	0.865	0	102.251	0.724	0.068	1.725	12.3519
1	WT	IAA10nM	475	11	20	channel1:WT_NAA10nM_T0020_00003_CH4	3.733	0.865	0	102.407	0.724	0.07	1.85	12.7152
1	WT	IAA10nM	500	11	21	channel1:WT_NAA10nM_T0021_00003_CH4	3.741	0.875	0	102.217	0.724	0.078	1.625	14.1684
1	WT	IAA10nM	525	11	22	channel1:WT_NAA10nM_T0022_00003_CH4	3.715	0.875	0	102.633	0.724	0.052	1.525	9.4456
1	WT	IAA10nM	550	11	23	channel1:WT_NAA10nM_T0023_00003_CH4	3.733	0.865	0	102.407	0.727	0.07	1.65	12.7152
1	WT	IAA10nM	575	11	24	channel1:WT_NAA10nM_T0024_00003_CH4	3.725	0.865	0	102.598	0.726	0.062	1.575	11.2621
1	WT	IAA10nM	600	11	25	channel1:WT_NAA10nM_T0025_00003_CH4	3.727	0.865	0	102.755	0.724	0.064	1.8	11.6254
1	WT	IAA10nM	625	11	26	channel1:WT_NAA10nM_T0026_00003_CH4	3.743	0.865	0	102.373	0.726	0.08	1.75	14.5317
1	WT	IAA10nM	650	11	27	channel1:WT_NAA10nM_T0027_00003_CH4	3.723	0.865	0	102.442	0.728	0.06	1.6875	10.8988
1	WT	IAA10nM	675	11	28	channel1:WT_NAA10nM_T0028_00003_CH4	3.738	0.875	0	102.719	0.725	0.075	1.9625	13.6235
1	WT	IAA10nM	700	11	29	channel1:WT_NAA10nM_T0029_00003_CH4	3.745	0.865	0	102.529	0.726	0.082	2.125	14.895
1	WT	IAA10nM	725	11	30	channel1:WT_NAA10nM_T0030_00003_CH4	3.751	0.865	0	102.184	0.726	0.088	1.975	15.9849
1	WT	IAA10nM	750	11	31	channel1:WT_NAA10nM_T0031_00003_CH4	3.733	0.865	0	102.407	0.731	0.07	1.9625	12.7152
1	WT	IAA10nM	775	11	32	channel1:WT_NAA10nM_T0032_00003_CH4	3.75	0.865	0	102.84	0.731	0.087	2.15	15.8032
1	WT	IAA10nM	800	11	33	channel1:WT_NAA10nM_T0033_00003_CH4	3.748	0.865	0	102.684	0.731	0.085	2.1875	15.4399
1	WT	IAA10nM	825	11	34	channel1:WT_NAA10nM_T0034_00003_CH4	3.753	0.865	0	102.339	0.726	0.09	2.45	16.3482
1	WT	IAA10nM	850	11	35	channel1:WT_NAA10nM_T0035_00003_CH4	3.769	0.865	0	101.962	0.728	0.106	2.5875	19.2545
1	WT	IAA10nM	875	11	36	channel1:WT_NAA10nM_T0036_00003_CH4	3.764	0.875	0	102.305	0.723	0.101	2.2375	18.3463
1	WT	IAA10nM	900	11	37	channel1:WT_NAA10nM_T0037_00003_CH4	3.741	0.865	0	102.217	0.728	0.078	2.0375	14.1684
1	WT	IAA10nM	925	11	38	channel1:WT_NAA10nM_T0038_00003_CH4	3.748	0.865	0	102.684	0.726	0.085	2.2875	15.4399
1	WT	IAA10nM	950	11	39	channel1:WT_NAA10nM_T0039_00003_CH4	3.761	0.865	0	102.15	0.731	0.098	2.2875	17.8013
1	WT	IAA10nM	975	11	40	channel1:WT_NAA10nM_T0040_00003_CH4	3.748	0.865	0	102.684	0.728	0.085	2.2875	15.4399
1	WT	IAA10nM	1000	11	41	channel1:WT_NAA10nM_T0041_00003_CH4	3.761	0.906	0	101.341	0.725	0.098	2.3	17.8013
1	WT	IAA10nM	1025	11	42	channel1:WT_NAA10nM_T0042_00003_CH4	3.749	0.865	0	102.028	0.724	0.086	2.275	15.6216
1	WT	IAA10nM	1050	11	43	channel1:WT_NAA10nM_T0043_00003_CH4	3.759	0.865	0	101.995	0.726	0.096	2.4875	17.438
1	WT	IAA10nM	1075	11	44	channel1:WT_NAA10nM_T0044_00003_CH4	3.766	0.854	0	102.46	0.733	0.103	2.5	18.7096
1	WT	IAA10nM	1100	11	45	channel1:WT_NAA10nM_T0045_00003_CH4	3.76	0.854	0	102.804	0.736	0.097	2.3375	17.6197
1	WT	IAA10nM	1125	11	46	channel1:WT_NAA10nM_T0046_00003_CH4	3.753	0.865	0	102.339	0.732	0.09	2.2875	16.3482
1	WT	IAA10nM	1150	11	47	channel1:WT_NAA10nM_T0047_00003_CH4	3.756	0.854	0	102.494	0.736	0.093	2.35	16.8931
1	WT	IAA10nM	1175	11	48	channel1:WT_NAA10nM_T0048_00003_CH4	3.758	0.854	0	102.649	0.736	0.095	2.2375	17.2564
1	WT	IAA10nM	1200	11	49	channel1:WT_NAA10nM_T0049_00003_CH4	3.747	0.906	0	101.872	0.724	0.084	2.2625	15.2583
1	WT	IAA10nM	1225	11	50	channel1:WT_NAA10nM_T0050_00003_CH4	3.76	0.854	0	102.804	0.736	0.097	84.9625	17.6197
1	WT	IAA10nM	0	12	1	channel1-1:WT_NAA10nM_T0001_00003_CH4	3.593	1.052	0	104.439	0.73	0	0.0625	0
1	WT	IAA10nM	25	12	2	channel1-1:WT_NAA10nM_T0002_00003_CH4	3.598	1.042	0	104.76	0.731	0.005	-0.1	0.908231
1	WT	IAA10nM	50	12	3	channel1-1:WT_NAA10nM_T0003_00003_CH4	3.58	1.115	0	103.632	0.717	-0.013	-0.0375	-2.3614
1	WT	IAA10nM	75	12	4	channel1-1:WT_NAA10nM_T0004_00003_CH4	3.603	1.042	0	105.081	0.718	0.01	0.3125	1.81646
1	WT	IAA10nM	100	12	5	channel1-1:WT_NAA10nM_T0005_00003_CH4	3.608	1.042	0	104.718	0.712	0.015	0.4375	2.72469
1	WT	IAA10nM	125	12	6	channel1-1:WT_NAA10nM_T0006_00003_CH4	3.613	1.042	0	105.038	0.701	0.02	0.5	3.63292
1	WT	IAA10nM	150	12	7	channel1-1:WT_NAA10nM_T0007_00003_CH4	3.613	1.052	0	105.038	0.703	0.02	0.5375	3.63292
1	WT	IAA10nM	175	12	8	channel1-1:WT_NAA10nM_T0008_00003_CH4	3.616	1.052	0	105.197	0.704	0.023	0.6375	4.17786
1	WT	IAA10nM	200	12	9	channel1-1:WT_NAA10nM_T0009_00003_CH4	3.621	1.062	0	104.836	0.704	0.028	0.8375	5.08609
1	WT	IAA10nM	225	12	10	channel1-1:WT_NAA10nM_T0010_00003_CH4	3.632	1.052	0	105.471	0.704	0.039	1.125	7.0842
1	WT	IAA10nM	250	12	11	channel1-1:WT_NAA10nM_T0011_00003_CH4	3.644	1.062	0	104.91	0.705	0.051	1.4	9.26395
1	WT	IAA10nM	275	12	12	channel1-1:WT_NAA10nM_T0012_00003_CH4	3.654	1.073	0	104.868	0.706	0.061	1.6125	11.0804
1	WT	IAA10nM	300	12	13	channel1-1:WT_NAA10nM_T0013_00003_CH4	3.661	1.062	0	104.669	0.705	0.068	1.7	12.3519
1	WT	IAA10nM	325	12	14	channel1-1:WT_NAA10nM_T0014_00003_CH4	3.661	1.052	0	104.669	0.703	0.068	1.575	12.3519
1	WT	IAA10nM	350	12	15	channel1-1:WT_NAA10nM_T0015_00003_CH4	3.651	1.042	0	104.71	0.702	0.058	1.675	10.5355
1	WT	IAA10nM	375	12	16	channel1-1:WT_NAA10nM_T0016_00003_CH4	3.669	1.031	0	105.141	0.704	0.076	1.7125	13.8051
1	WT	IAA10nM	400	12	17	channel1-1:WT_NAA10nM_T0017_00003_CH4	3.654	1.031	0	105.542	0.704	0.061	1.775	11.0804
1	WT	IAA10nM	425	12	18	channel1-1:WT_NAA10nM_T0018_00003_CH4	3.674	1.031	0	104.785	0.703	0.081	1.8625	14.7133
1	WT	IAA10nM	450	12	19	channel1-1:WT_NAA10nM_T0019_00003_CH4	3.661	1.031	0	104.669	0.704	0.068	1.9625	12.3519
1	WT	IAA10nM	475	12	20	channel1-1:WT_NAA10nM_T0020_00003_CH4	3.682	1.031	0	105.255	0.702	0.089	1.9625	16.1665
1	WT	IAA10nM	500	12	21	channel1-1:WT_NAA10nM_T0021_00003_CH4	3.661	1.094	0	104.669	0.704	0.068	1.8	12.3519
1	WT	IAA10nM	525	12	22	channel1-1:WT_NAA10nM_T0022_00003_CH4	3.669	1.052	0	105.141	0.702	0.076	1.8625	13.8051
1	WT	IAA10nM	550	12	23	channel1-1:WT_NAA10nM_T0023_00003_CH4	3.666	1.042	0	104.984	0.704	0.073	1.9875	13.2602
1	WT	IAA10nM	575	12	24	channel1-1:WT_NAA10nM_T0024_00003_CH4	3.679	1.031	0	105.099	0.706	0.086	2.1875	15.6216
1	WT	IAA10nM	600	12	25	channel1-1:WT_NAA10nM_T0025_00003_CH4	3.682	1.031	0	105.255	0.706	0.089	2.1375	16.1665
1	WT	IAA10nM	625	12	26	channel1-1:WT_NAA10nM_T0026_00003_CH4	3.675	1.031	0	105.455	0.71	0.082	2.225	14.895
1	WT	IAA10nM	650	12	27	channel1-1:WT_NAA10nM_T0027_00003_CH4	3.689	1.042	0	105.056	0.704	0.096	2.35	17.438
1	WT	IAA10nM	675	12	28	channel1-1:WT_NAA10nM_T0028_00003_CH4	3.685	1.031	0	105.411	0.709	0.092	2.125	16.7114
1	WT	IAA10nM	700	12	29	channel1-1:WT_NAA10nM_T0029_00003_CH4	3.671	1.042	0	104.628	0.708	0.078	1.925	14.1684
1	WT	IAA10nM	725	12	30	channel1-1:WT_NAA10nM_T0030_00003_CH4	3.669	1.062	0	105.141	0.709	0.076	2.125	13.8051
1	WT	IAA10nM	750	12	31	channel1-1:WT_NAA10nM_T0031_00003_CH4	3.687	1.021	0	105.567	0.709	0.094	2.325	17.0747
1	WT	IAA10nM	775	12	32	channel1-1:WT_NAA10nM_T0032_00003_CH4	3.685	1.021	0	105.411	0.703	0.092	2.5125	16.7114
1	WT	IAA10nM	800	12	33	channel1-1:WT_NAA10nM_T0033_00003_CH4	3.702	1.031	0	105.17	0.705	0.109	2.6875	19.7994
1	WT	IAA10nM	825	12	34	channel1-1:WT_NAA10nM_T0034_00003_CH4	3.699	1.042	0	105.015	0.707	0.106	2.725	19.2545
1	WT	IAA10nM	850	12	35	channel1-1:WT_NAA10nM_T0035_00003_CH4	3.705	1.031	0	105.326	0.709	0.112	2.6	20.3444
1	WT	IAA10nM	875	12	36	channel1-1:WT_NAA10nM_T0036_00003_CH4	3.689	1.052	0.01	105.056	0.707	0.096	2.5625	17.438
1	WT	IAA10nM	900	12	37	channel1-1:WT_NAA10nM_T0037_00003_CH4	3.702	1.042	0	105.17	0.705	0.109	2.6625	19.7994
1	WT	IAA10nM	925	12	38	channel1-1:WT_NAA10nM_T0038_00003_CH4	3.697	1.052	0.01	104.859	0.707	0.104	2.725	18.8912
1	WT	IAA10nM	950	12	39	channel1-1:WT_NAA10nM_T0039_00003_CH4	3.707	1.021	0	105.481	0.709	0.114	2.9125	20.7077
1	WT	IAA10nM	975	12	40	channel1-1:WT_NAA10nM_T0040_00003_CH4	3.712	1.042	0	105.128	0.704	0.119	2.8875	21.6159
1	WT	IAA10nM	1000	12	41	channel1-1:WT_NAA10nM_T0041_00003_CH4	3.705	1.042	0	105.326	0.709	0.112	2.8875	20.3444
1	WT	IAA10nM	1025	12	42	channel1-1:WT_NAA10nM_T0042_00003_CH4	3.712	1.042	0	105.128	0.704	0.119	2.85	21.6159
1	WT	IAA10nM	1050	12	43	channel1-1:WT_NAA10nM_T0043_00003_CH4	3.702	1.052	0	105.17	0.707	0.109	2.75	19.7994
1	WT	IAA10nM	1075	12	44	channel1-1:WT_NAA10nM_T0044_00003_CH4	3.704	1.042	0	104.662	0.704	0.111	2.8875	20.1627
1	WT	IAA10nM	1100	12	45	channel1-1:WT_NAA10nM_T0045_00003_CH4	3.713	1.021	0	105.791	0.705	0.12	3.025	21.7975
1	WT	IAA10nM	1125	12	46	channel1-1:WT_NAA10nM_T0046_00003_CH4	3.715	1.042	0	105.283	0.704	0.122	2.75	22.1608
1	WT	IAA10nM	1150	12	47	channel1-1:WT_NAA10nM_T0047_00003_CH4	3.691	1.042	0.01	104.546	0.708	0.098	2.875	17.8013
1	WT	IAA10nM	1175	12	48	channel1-1:WT_NAA10nM_T0048_00003_CH4	3.725	1.042	0	105.241	0.712	0.132	3.0375	23.9773
1	WT	IAA10nM	1200	12	49	channel1-1:WT_NAA10nM_T0049_00003_CH4	3.704	1.042	0.01	104.662	0.71	0.111	2.675	20.1627
1	WT	IAA10nM	1225	12	50	channel1-1:WT_NAA10nM_T0050_00003_CH4	3.696	1.104	0	103.527	0.709	0.103	94.6125	18.7096
1	WT	IAA10nM	0	15	1	channel1-1:WT_NAA10nM_T0001_00004_CH4	3.469	0.573	0	108.925	0.69	0	-0.0875	0
1	WT	IAA10nM	25	15	2	channel1-1:WT_NAA10nM_T0002_00004_CH4	3.462	0.573	0	109.144	0.691	-0.007	-0.2375	-1.27152
1	WT	IAA10nM	50	15	3	channel1-1:WT_NAA10nM_T0003_00004_CH4	3.457	0.562	0	109.909	0.691	-0.012	0.05	-2.17975
1	WT	IAA10nM	75	15	4	channel1-1:WT_NAA10nM_T0004_00004_CH4	3.485	0.562	0	109.193	0.691	0.016	0.575	2.90634
1	WT	IAA10nM	100	15	5	channel1-1:WT_NAA10nM_T0005_00004_CH4	3.499	0.562	0	109.837	0.692	0.03	0.8375	5.44939
1	WT	IAA10nM	125	15	6	channel1-1:WT_NAA10nM_T0006_00004_CH4	3.506	0.562	0	109.619	0.691	0.037	0.8875	6.72091
1	WT	IAA10nM	150	15	7	channel1-1:WT_NAA10nM_T0007_00004_CH4	3.503	0.562	0	109.998	0.69	0.034	0.8875	6.17597
1	WT	IAA10nM	175	15	8	channel1-1:WT_NAA10nM_T0008_00004_CH4	3.506	0.562	0	109.619	0.689	0.037	1.05	6.72091
1	WT	IAA10nM	200	15	9	channel1-1:WT_NAA10nM_T0009_00004_CH4	3.516	0.562	0	110.099	0.691	0.047	1.375	8.53737
1	WT	IAA10nM	225	15	10	channel1-1:WT_NAA10nM_T0010_00004_CH4	3.532	0.562	0	109.29	0.691	0.063	1.45	11.4437
1	WT	IAA10nM	250	15	11	channel1-1:WT_NAA10nM_T0011_00004_CH4	3.522	0.573	0	109.346	0.688	0.053	1.2375	9.62725
1	WT	IAA10nM	275	15	12	channel1-1:WT_NAA10nM_T0012_00004_CH4	3.515	0.573	0	109.562	0.691	0.046	1.4875	8.35572
1	WT	IAA10nM	300	15	13	channel1-1:WT_NAA10nM_T0013_00004_CH4	3.542	0.583	0	109.767	0.69	0.073	1.6625	13.2602
1	WT	IAA10nM	325	15	14	channel1-1:WT_NAA10nM_T0014_00004_CH4	3.529	0.583	0	109.665	0.688	0.06	1.825	10.8988
1	WT	IAA10nM	350	15	15	channel1-1:WT_NAA10nM_T0015_00004_CH4	3.555	0.562	0	109.868	0.689	0.086	2.05	15.6216
1	WT	IAA10nM	375	15	16	channel1-1:WT_NAA10nM_T0016_00004_CH4	3.547	0.573	0	110.458	0.688	0.078	1.7375	14.1684
1	WT	IAA10nM	400	15	17	channel1-1:WT_NAA10nM_T0017_00004_CH4	3.53	0.573	0	110.2	0.69	0.061	1.5	11.0804
1	WT	IAA10nM	425	15	18	channel1-1:WT_NAA10nM_T0018_00004_CH4	3.528	0.562	0	111.11	0.688	0.059	1.6375	10.7171
1	WT	IAA10nM	450	15	19	channel1-1:WT_NAA10nM_T0019_00004_CH4	3.541	0.562	0	110.674	0.691	0.072	1.8	13.0785
1	WT	IAA10nM	475	15	20	channel1-1:WT_NAA10nM_T0020_00004_CH4	3.541	0.573	0	110.674	0.688	0.072	2.1	13.0785
1	WT	IAA10nM	500	15	21	channel1-1:WT_NAA10nM_T0021_00004_CH4	3.565	0.552	0	111.242	0.688	0.096	2.2375	17.438
1	WT	IAA10nM	525	15	22	channel1-1:WT_NAA10nM_T0022_00004_CH4	3.552	0.552	0	111.146	0.69	0.083	2.1	15.0766
1	WT	IAA10nM	550	15	23	channel1-1:WT_NAA10nM_T0023_00004_CH4	3.554	0.562	0	110.772	0.69	0.085	1.875	15.4399
1	WT	IAA10nM	575	15	24	channel1-1:WT_NAA10nM_T0024_00004_CH4	3.534	0.562	0	110.892	0.688	0.065	1.775	11.807
1	WT	IAA10nM	600	15	25	channel1-1:WT_NAA10nM_T0025_00004_CH4	3.546	0.562	0	111.364	0.686	0.077	1.975	13.9868
1	WT	IAA10nM	625	15	26	channel1-1:WT_NAA10nM_T0026_00004_CH4	3.55	0.552	0	111.52	0.688	0.081	2.025	14.7133
1	WT	IAA10nM	650	15	27	channel1-1:WT_NAA10nM_T0027_00004_CH4	3.55	0.562	0	110.615	0.688	0.081	2.2125	14.7133
1	WT	IAA10nM	675	15	28	channel1-1:WT_NAA10nM_T0028_00004_CH4	3.565	0.552	0	111.242	0.689	0.096	2.35	17.438
1	WT	IAA10nM	700	15	29	channel1-1:WT_NAA10nM_T0029_00004_CH4	3.561	0.562	0	111.086	0.688	0.092	2.425	16.7114
1	WT	IAA10nM	725	15	30	channel1-1:WT_NAA10nM_T0030_00004_CH4	3.571	0.552	0	111.026	0.691	0.102	2.675	18.5279
1	WT	IAA10nM	750	15	31	channel1-1:WT_NAA10nM_T0031_00004_CH4	3.581	0.562	0	110.966	0.689	0.112	2.625	20.3444
1	WT	IAA10nM	775	15	32	channel1-1:WT_NAA10nM_T0032_00004_CH4	3.567	0.573	0	110.869	0.688	0.098	2.7	17.8013
1	WT	IAA10nM	800	15	33	channel1-1:WT_NAA10nM_T0033_00004_CH4	3.587	0.573	0	110.751	0.688	0.118	2.625	21.4342
1	WT	IAA10nM	825	15	34	channel1-1:WT_NAA10nM_T0034_00004_CH4	3.561	0.573	0	111.086	0.688	0.092	2.55	16.7114
1	WT	IAA10nM	850	15	35	channel1-1:WT_NAA10nM_T0035_00004_CH4	3.581	0.562	0	110.966	0.691	0.112	2.8	20.3444
1	WT	IAA10nM	875	15	36	channel1-1:WT_NAA10nM_T0036_00004_CH4	3.581	0.573	0	110.966	0.687	0.112	3.3875	20.3444
1	WT	IAA10nM	900	15	37	channel1-1:WT_NAA10nM_T0037_00004_CH4	3.628	0.573	0	110.152	0.688	0.159	3.75	28.8817
1	WT	IAA10nM	925	15	38	channel1-1:WT_NAA10nM_T0038_00004_CH4	3.61	0.562	0	110.788	0.691	0.141	3.2125	25.6121
1	WT	IAA10nM	950	15	39	channel1-1:WT_NAA10nM_T0039_00004_CH4	3.585	0.562	0	111.121	0.688	0.116	2.9375	21.071
1	WT	IAA10nM	975	15	40	channel1-1:WT_NAA10nM_T0040_00004_CH4	3.588	0.562	0	111.276	0.691	0.119	2.975	21.6159
1	WT	IAA10nM	1000	15	41	channel1-1:WT_NAA10nM_T0041_00004_CH4	3.588	0.562	0	111.276	0.691	0.119	2.7125	21.6159
1	WT	IAA10nM	1025	15	42	channel1-1:WT_NAA10nM_T0042_00004_CH4	3.567	0.573	0	110.869	0.69	0.098	2.6375	17.8013
1	WT	IAA10nM	1050	15	43	channel1-1:WT_NAA10nM_T0043_00004_CH4	3.582	0.562	0	111.492	0.685	0.113	2.975	20.526
1	WT	IAA10nM	1075	15	44	channel1-1:WT_NAA10nM_T0044_00004_CH4	3.594	0.583	0	111.061	0.689	0.125	3.125	22.7058
1	WT	IAA10nM	1100	15	45	channel1-1:WT_NAA10nM_T0045_00004_CH4	3.594	0.583	0	111.061	0.688	0.125	3.0875	22.7058
1	WT	IAA10nM	1125	15	46	channel1-1:WT_NAA10nM_T0046_00004_CH4	3.591	0.583	0	110.906	0.685	0.122	3.05	22.1608
1	WT	IAA10nM	1150	15	47	channel1-1:WT_NAA10nM_T0047_00004_CH4	3.591	0.573	0	110.906	0.688	0.122	3.0125	22.1608
1	WT	IAA10nM	1175	15	48	channel1-1:WT_NAA10nM_T0048_00004_CH4	3.588	0.573	0	111.276	0.688	0.119	2.8875	21.6159
1	WT	IAA10nM	1200	15	49	channel1-1:WT_NAA10nM_T0049_00004_CH4	3.581	0.583	0	110.966	0.691	0.112	3.0125	20.3444
1	WT	IAA10nM	1225	15	50	channel1-1:WT_NAA10nM_T0050_00004_CH4	3.598	0.573	0	111.216	0.688	0.129	101.538	23.4324
1	WT	IAA10nM	0	16	1	channel1:WT_NAA10nM_T0001_00005_CH4	3.146	0.26	0	109.335	0.687	0	0.125	0
1	WT	IAA10nM	25	16	2	channel1:WT_NAA10nM_T0002_00005_CH4	3.156	0.26	0	109.272	0.688	0.01	0.3375	1.81646
1	WT	IAA10nM	50	16	3	channel1:WT_NAA10nM_T0003_00005_CH4	3.163	0.26	0	109.628	0.687	0.017	0.5875	3.08798
1	WT	IAA10nM	75	16	4	channel1:WT_NAA10nM_T0004_00005_CH4	3.176	0.271	0	109.742	0.687	0.03	0.75	5.44939
1	WT	IAA10nM	100	16	5	channel1:WT_NAA10nM_T0005_00005_CH4	3.176	0.271	0	109.742	0.686	0.03	0.95	5.44939
1	WT	IAA10nM	125	16	6	channel1:WT_NAA10nM_T0006_00005_CH4	3.192	0.229	0	111.038	0.686	0.046	1.0875	8.35572
1	WT	IAA10nM	150	16	7	channel1:WT_NAA10nM_T0007_00005_CH4	3.187	0.26	0	110.271	0.687	0.041	1.1125	7.44749
1	WT	IAA10nM	175	16	8	channel1:WT_NAA10nM_T0008_00005_CH4	3.194	0.25	0	110.622	0.687	0.048	1.525	8.71902
1	WT	IAA10nM	200	16	9	channel1:WT_NAA10nM_T0009_00005_CH4	3.22	0.25	0	110.252	0.687	0.074	1.775	13.4418
1	WT	IAA10nM	225	16	10	channel1:WT_NAA10nM_T0010_00005_CH4	3.214	0.26	0	110.491	0.687	0.068	2.075	12.3519
1	WT	IAA10nM	250	16	11	channel1:WT_NAA10nM_T0011_00005_CH4	3.244	0.25	0	110.879	0.687	0.098	2.2125	17.8013
1	WT	IAA10nM	275	16	12	channel1:WT_NAA10nM_T0012_00005_CH4	3.225	0.25	0	111.011	0.685	0.079	1.9625	14.35
1	WT	IAA10nM	300	16	13	channel1:WT_NAA10nM_T0013_00005_CH4	3.224	0.271	0	110.426	0.686	0.078	2.0375	14.1684
1	WT	IAA10nM	325	16	14	channel1:WT_NAA10nM_T0014_00005_CH4	3.231	0.271	0	110.772	0.686	0.085	2.25	15.4399
1	WT	IAA10nM	350	16	15	channel1:WT_NAA10nM_T0015_00005_CH4	3.241	0.271	0	110.707	0.685	0.095	2.4625	17.2564
1	WT	IAA10nM	375	16	16	channel1:WT_NAA10nM_T0016_00005_CH4	3.248	0.26	0	111.051	0.685	0.102	2.3875	18.5279
1	WT	IAA10nM	400	16	17	channel1:WT_NAA10nM_T0017_00005_CH4	3.235	0.26	0	110.945	0.684	0.089	2.025	16.1665
1	WT	IAA10nM	425	16	18	channel1:WT_NAA10nM_T0018_00005_CH4	3.219	0.281	0	111.251	0.685	0.073	1.95	13.2602
1	WT	IAA10nM	450	16	19	channel1:WT_NAA10nM_T0019_00005_CH4	3.229	0.271	0	111.184	0.685	0.083	2.1	15.0766
1	WT	IAA10nM	475	16	20	channel1:WT_NAA10nM_T0020_00005_CH4	3.231	0.271	0	110.772	0.683	0.085	2.2375	15.4399
1	WT	IAA10nM	500	16	21	channel1:WT_NAA10nM_T0021_00005_CH4	3.24	0.24	0	111.699	0.685	0.094	2.525	17.0747
1	WT	IAA10nM	525	16	22	channel1:WT_NAA10nM_T0022_00005_CH4	3.254	0.25	0	111.801	0.684	0.108	2.8625	19.6178
1	WT	IAA10nM	550	16	23	channel1:WT_NAA10nM_T0023_00005_CH4	3.267	0.24	0	111.903	0.685	0.121	2.7375	21.9792
1	WT	IAA10nM	575	16	24	channel1:WT_NAA10nM_T0024_00005_CH4	3.244	0.24	0	111.87	0.684	0.098	2.6125	17.8013
1	WT	IAA10nM	600	16	25	channel1:WT_NAA10nM_T0025_00005_CH4	3.257	0.24	0	111.972	0.684	0.111	2.6625	20.1627
1	WT	IAA10nM	625	16	26	channel1:WT_NAA10nM_T0026_00005_CH4	3.248	0.24	0	112.04	0.685	0.102	2.575	18.5279
1	WT	IAA10nM	650	16	27	channel1:WT_NAA10nM_T0027_00005_CH4	3.25	0.24	0	111.631	0.684	0.104	2.7125	18.8912
1	WT	IAA10nM	675	16	28	channel1:WT_NAA10nM_T0028_00005_CH4	3.259	0.229	0	111.563	0.685	0.113	2.7125	20.526
1	WT	IAA10nM	700	16	29	channel1:WT_NAA10nM_T0029_00005_CH4	3.25	0.24	0	111.631	0.685	0.104	2.6	18.8912
1	WT	IAA10nM	725	16	30	channel1:WT_NAA10nM_T0030_00005_CH4	3.25	0.25	0	111.631	0.684	0.104	2.65	18.8912
1	WT	IAA10nM	750	16	31	channel1:WT_NAA10nM_T0031_00005_CH4	3.254	0.229	0	111.801	0.683	0.108	2.9125	19.6178
1	WT	IAA10nM	775	16	32	channel1:WT_NAA10nM_T0032_00005_CH4	3.271	0.24	0	112.072	0.684	0.125	3	22.7058
1	WT	IAA10nM	800	16	33	channel1:WT_NAA10nM_T0033_00005_CH4	3.261	0.24	0	112.141	0.685	0.115	2.875	20.8893
1	WT	IAA10nM	825	16	34	channel1:WT_NAA10nM_T0034_00005_CH4	3.261	0.229	0	112.141	0.684	0.115	3.125	20.8893
1	WT	IAA10nM	850	16	35	channel1:WT_NAA10nM_T0035_00005_CH4	3.281	0.24	0	112.004	0.686	0.135	3.4875	24.5222
1	WT	IAA10nM	875	16	36	channel1:WT_NAA10nM_T0036_00005_CH4	3.29	0.24	0	111.936	0.684	0.144	3.5375	26.157
1	WT	IAA10nM	900	16	37	channel1:WT_NAA10nM_T0037_00005_CH4	3.285	0.229	0	112.173	0.684	0.139	3.6125	25.2488
1	WT	IAA10nM	925	16	38	channel1:WT_NAA10nM_T0038_00005_CH4	3.296	0.219	0	112.676	0.685	0.15	3.6375	27.2469
1	WT	IAA10nM	950	16	39	channel1:WT_NAA10nM_T0039_00005_CH4	3.287	0.219	0	112.746	0.685	0.141	3.55	25.6121
1	WT	IAA10nM	975	16	40	channel1:WT_NAA10nM_T0040_00005_CH4	3.289	0.229	0	112.341	0.685	0.143	3.6875	25.9754
1	WT	IAA10nM	1000	16	41	channel1:WT_NAA10nM_T0041_00005_CH4	3.298	0.229	0	112.272	0.684	0.152	3.3375	27.6102
1	WT	IAA10nM	1025	16	42	channel1:WT_NAA10nM_T0042_00005_CH4	3.261	0.292	0	111.156	0.682	0.115	2.875	20.8893
1	WT	IAA10nM	1050	16	43	channel1:WT_NAA10nM_T0043_00005_CH4	3.261	0.292	0	111.156	0.685	0.115	3.05	20.8893
1	WT	IAA10nM	1075	16	44	channel1:WT_NAA10nM_T0044_00005_CH4	3.275	0.292	0	111.26	0.684	0.129	3.5625	23.4324
1	WT	IAA10nM	1100	16	45	channel1:WT_NAA10nM_T0045_00005_CH4	3.302	0.229	0	112.439	0.685	0.156	3.9	28.3368
1	WT	IAA10nM	1125	16	46	channel1:WT_NAA10nM_T0046_00005_CH4	3.302	0.229	0	112.439	0.685	0.156	4.025	28.3368
1	WT	IAA10nM	1150	16	47	channel1:WT_NAA10nM_T0047_00005_CH4	3.312	0.229	0	112.37	0.682	0.166	4.0625	30.1533
1	WT	IAA10nM	1175	16	48	channel1:WT_NAA10nM_T0048_00005_CH4	3.305	0.219	0	113.009	0.684	0.159	3.8375	28.8817
1	WT	IAA10nM	1200	16	49	channel1:WT_NAA10nM_T0049_00005_CH4	3.294	0.24	0	112.104	0.684	0.148	3.7	26.8836
1	WT	IAA10nM	1225	16	50	channel1:WT_NAA10nM_T0050_00005_CH4	3.294	0.24	0	112.104	0.684	0.148	124.375	26.8836
1	WT	IAA10nM	0	17	1	channel1-1:WT_NAA10nM_T0001_00005_CH4	3.39	2.052	3.375	84.535	0.664	0	0.4625	0
1	WT	IAA10nM	25	17	2	channel1-1:WT_NAA10nM_T0002_00005_CH4	3.427	2.021	3.406	83.718	0.668	0.037	0.725	6.72091
1	WT	IAA10nM	50	17	3	channel1-1:WT_NAA10nM_T0003_00005_CH4	3.411	2.052	3.396	84.568	0.664	0.021	0.525	3.81457
1	WT	IAA10nM	75	17	4	channel1-1:WT_NAA10nM_T0004_00005_CH4	3.411	2.062	3.396	84.568	0.666	0.021	0.6875	3.81457
1	WT	IAA10nM	100	17	5	channel1-1:WT_NAA10nM_T0005_00005_CH4	3.424	2.052	3.406	84.237	0.673	0.034	0.8375	6.17597
1	WT	IAA10nM	125	17	6	channel1-1:WT_NAA10nM_T0006_00005_CH4	3.423	2.062	3.406	84.411	0.669	0.033	0.825	5.99432
1	WT	IAA10nM	150	17	7	channel1-1:WT_NAA10nM_T0007_00005_CH4	3.423	2.052	3.406	84.411	0.668	0.033	0.9625	5.99432
1	WT	IAA10nM	175	17	8	channel1-1:WT_NAA10nM_T0008_00005_CH4	3.434	2.062	3.417	84.255	0.67	0.044	1.225	7.99243
1	WT	IAA10nM	200	17	9	channel1-1:WT_NAA10nM_T0009_00005_CH4	3.444	2.052	3.427	84.272	0.677	0.054	1.3375	9.80889
1	WT	IAA10nM	225	17	10	channel1-1:WT_NAA10nM_T0010_00005_CH4	3.443	2.062	3.427	84.445	0.683	0.053	1.15	9.62725
1	WT	IAA10nM	250	17	11	channel1-1:WT_NAA10nM_T0011_00005_CH4	3.429	2.062	3.417	85.121	0.673	0.039	1.1	7.0842
1	WT	IAA10nM	275	17	12	channel1-1:WT_NAA10nM_T0012_00005_CH4	3.439	2.062	3.427	85.135	0.672	0.049	1.225	8.90066
1	WT	IAA10nM	300	17	13	channel1-1:WT_NAA10nM_T0013_00005_CH4	3.439	2.062	3.427	85.135	0.665	0.049	1.475	8.90066
1	WT	IAA10nM	325	17	14	channel1-1:WT_NAA10nM_T0014_00005_CH4	3.459	2.062	3.448	85.337	0.673	0.069	1.725	12.5336
1	WT	IAA10nM	350	17	15	channel1-1:WT_NAA10nM_T0015_00005_CH4	3.459	2.062	3.448	85.337	0.672	0.069	1.6125	12.5336
1	WT	IAA10nM	375	17	16	channel1-1:WT_NAA10nM_T0016_00005_CH4	3.45	2.062	3.438	85.15	0.674	0.06	1.575	10.8988
1	WT	IAA10nM	400	17	17	channel1-1:WT_NAA10nM_T0017_00005_CH4	3.456	2.062	3.438	84.118	0.665	0.066	1.8125	11.9886
1	WT	IAA10nM	425	17	18	channel1-1:WT_NAA10nM_T0018_00005_CH4	3.469	2.031	3.448	83.622	0.68	0.079	1.975	14.35
1	WT	IAA10nM	450	17	19	channel1-1:WT_NAA10nM_T0019_00005_CH4	3.469	2.031	3.448	83.622	0.684	0.079	1.9125	14.35
1	WT	IAA10nM	475	17	20	channel1-1:WT_NAA10nM_T0020_00005_CH4	3.464	2.031	3.448	84.478	0.688	0.074	1.8625	13.4418
1	WT	IAA10nM	500	17	21	channel1-1:WT_NAA10nM_T0021_00005_CH4	3.465	2.021	3.448	84.307	0.67	0.075	1.875	13.6235
1	WT	IAA10nM	525	17	22	channel1-1:WT_NAA10nM_T0022_00005_CH4	3.465	2.021	3.448	84.307	0.677	0.075	1.9625	13.6235
1	WT	IAA10nM	550	17	23	channel1-1:WT_NAA10nM_T0023_00005_CH4	3.472	2.042	3.458	84.837	0.677	0.082	2.0625	14.895
1	WT	IAA10nM	575	17	24	channel1-1:WT_NAA10nM_T0024_00005_CH4	3.473	2.042	3.458	84.666	0.669	0.083	1.9625	15.0766
1	WT	IAA10nM	600	17	25	channel1-1:WT_NAA10nM_T0025_00005_CH4	3.464	2.031	3.448	84.478	0.669	0.074	2.1125	13.4418
1	WT	IAA10nM	625	17	26	channel1-1:WT_NAA10nM_T0026_00005_CH4	3.485	2.031	3.469	84.511	0.67	0.095	2.35	17.2564
1	WT	IAA10nM	650	17	27	channel1-1:WT_NAA10nM_T0027_00005_CH4	3.483	2.042	3.469	84.852	0.664	0.093	2.3375	16.8931
1	WT	IAA10nM	675	17	28	channel1-1:WT_NAA10nM_T0028_00005_CH4	3.484	2.031	3.469	84.681	0.675	0.094	2.35	17.0747
1	WT	IAA10nM	700	17	29	channel1-1:WT_NAA10nM_T0029_00005_CH4	3.484	2.042	3.469	84.681	0.676	0.094	2.4	17.0747
1	WT	IAA10nM	725	17	30	channel1-1:WT_NAA10nM_T0030_00005_CH4	3.488	2.042	3.469	84	0.67	0.098	2.45	17.8013
1	WT	IAA10nM	750	17	31	channel1-1:WT_NAA10nM_T0031_00005_CH4	3.488	2.115	3.479	85.89	0.674	0.098	2.4	17.8013
1	WT	IAA10nM	775	17	32	channel1-1:WT_NAA10nM_T0032_00005_CH4	3.484	2.042	3.469	84.681	0.667	0.094	2.4	17.0747
1	WT	IAA10nM	800	17	33	channel1-1:WT_NAA10nM_T0033_00005_CH4	3.488	2.115	3.479	85.89	0.667	0.098	2.3625	17.8013
1	WT	IAA10nM	825	17	34	channel1-1:WT_NAA10nM_T0034_00005_CH4	3.481	2.021	3.458	83.47	0.677	0.091	2.3875	16.5298
1	WT	IAA10nM	850	17	35	channel1-1:WT_NAA10nM_T0035_00005_CH4	3.49	2.031	3.469	83.66	0.667	0.1	2.65	18.1646
1	WT	IAA10nM	875	17	36	channel1-1:WT_NAA10nM_T0036_00005_CH4	3.502	2.021	3.479	83.509	0.672	0.112	2.775	20.3444
1	WT	IAA10nM	900	17	37	channel1-1:WT_NAA10nM_T0037_00005_CH4	3.5	2.031	3.479	83.679	0.668	0.11	2.6375	19.9811
1	WT	IAA10nM	925	17	38	channel1-1:WT_NAA10nM_T0038_00005_CH4	3.491	2.021	3.469	83.49	0.668	0.101	2.6625	18.3463
1	WT	IAA10nM	950	17	39	channel1-1:WT_NAA10nM_T0039_00005_CH4	3.502	2.042	3.479	83.509	0.677	0.112	2.7625	20.3444
1	WT	IAA10nM	975	17	40	channel1-1:WT_NAA10nM_T0040_00005_CH4	3.499	2.042	3.479	83.848	0.676	0.109	2.6875	19.7994
1	WT	IAA10nM	1000	17	41	channel1-1:WT_NAA10nM_T0041_00005_CH4	3.496	2.021	3.479	84.357	0.677	0.106	2.75	19.2545
1	WT	IAA10nM	1025	17	42	channel1-1:WT_NAA10nM_T0042_00005_CH4	3.504	2.042	3.49	84.713	0.677	0.114	2.8	20.7077
1	WT	IAA10nM	1050	17	43	channel1-1:WT_NAA10nM_T0043_00005_CH4	3.5	2.031	3.479	83.679	0.67	0.11	2.525	19.9811
1	WT	IAA10nM	1075	17	44	channel1-1:WT_NAA10nM_T0044_00005_CH4	3.482	2.115	3.469	85.023	0.668	0.092	2.4	16.7114
1	WT	IAA10nM	1100	17	45	channel1-1:WT_NAA10nM_T0045_00005_CH4	3.49	2.031	3.469	83.66	0.678	0.1	2.7625	18.1646
1	WT	IAA10nM	1125	17	46	channel1-1:WT_NAA10nM_T0046_00005_CH4	3.511	2.031	3.49	83.697	0.667	0.121	2.7625	21.9792
1	WT	IAA10nM	1150	17	47	channel1-1:WT_NAA10nM_T0047_00005_CH4	3.49	2.031	3.469	83.66	0.668	0.1	2.3875	18.1646
1	WT	IAA10nM	1175	17	48	channel1-1:WT_NAA10nM_T0048_00005_CH4	3.481	2.021	3.458	83.47	0.675	0.091	2.4875	16.5298
1	WT	IAA10nM	1200	17	49	channel1-1:WT_NAA10nM_T0049_00005_CH4	3.498	2.052	3.479	84.018	0.674	0.108	2.5	19.6178
1	WT	IAA10nM	1225	17	50	channel1-1:WT_NAA10nM_T0050_00005_CH4	3.482	2.115	3.469	85.023	0.678	0.092	95.975	16.7114
1	WT	IAA10nM	0	18	1	channel1:WT_NAA10nM_T0001_00006_CH4	2.736	0.354	0	101.866	0.586	0	-0.1375	0
1	WT	IAA10nM	25	18	2	channel1:WT_NAA10nM_T0002_00006_CH4	2.725	0.354	0	101.911	0.586	-0.011	-0.275	-1.99811
1	WT	IAA10nM	50	18	3	channel1:WT_NAA10nM_T0003_00006_CH4	2.725	0.396	0	100.795	0.587	-0.011	-0.1375	-1.99811
1	WT	IAA10nM	75	18	4	channel1:WT_NAA10nM_T0004_00006_CH4	2.736	0.354	0	101.866	0.586	0	0.025	0
1	WT	IAA10nM	100	18	5	channel1:WT_NAA10nM_T0005_00006_CH4	2.738	0.354	0	102.08	0.587	0.002	0.125	0.363292
1	WT	IAA10nM	125	18	6	channel1:WT_NAA10nM_T0006_00006_CH4	2.744	0.354	0	101.609	0.586	0.008	0.225	1.45317
1	WT	IAA10nM	150	18	7	channel1:WT_NAA10nM_T0007_00006_CH4	2.746	0.354	0	101.821	0.586	0.01	0.35	1.81646
1	WT	IAA10nM	175	18	8	channel1:WT_NAA10nM_T0008_00006_CH4	2.754	0.354	0	101.565	0.587	0.018	0.45	3.26963
1	WT	IAA10nM	200	18	9	channel1:WT_NAA10nM_T0009_00006_CH4	2.754	0.354	0	101.565	0.587	0.018	0.475	3.26963
1	WT	IAA10nM	225	18	10	channel1:WT_NAA10nM_T0010_00006_CH4	2.756	0.365	0	101.777	0.588	0.02	0.525	3.63292
1	WT	IAA10nM	250	18	11	channel1:WT_NAA10nM_T0011_00006_CH4	2.758	0.354	0	101.989	0.587	0.022	0.525	3.99622
1	WT	IAA10nM	275	18	12	channel1:WT_NAA10nM_T0012_00006_CH4	2.756	0.365	0	101.777	0.586	0.02	0.575	3.63292
1	WT	IAA10nM	300	18	13	channel1:WT_NAA10nM_T0013_00006_CH4	2.762	0.354	0	101.31	0.587	0.026	0.675	4.7228
1	WT	IAA10nM	325	18	14	channel1:WT_NAA10nM_T0014_00006_CH4	2.764	0.354	0	101.522	0.587	0.028	0.725	5.08609
1	WT	IAA10nM	350	18	15	channel1:WT_NAA10nM_T0015_00006_CH4	2.766	0.344	0	101.733	0.588	0.03	0.775	5.44939
1	WT	IAA10nM	375	18	16	channel1:WT_NAA10nM_T0016_00006_CH4	2.768	0.344	0	101.944	0.587	0.032	0.775	5.81268
1	WT	IAA10nM	400	18	17	channel1:WT_NAA10nM_T0017_00006_CH4	2.766	0.344	0	101.733	0.589	0.03	0.8	5.44939
1	WT	IAA10nM	425	18	18	channel1:WT_NAA10nM_T0018_00006_CH4	2.77	0.344	0	102.155	0.587	0.034	0.825	6.17597
1	WT	IAA10nM	450	18	19	channel1:WT_NAA10nM_T0019_00006_CH4	2.768	0.354	0	101.944	0.588	0.032	0.675	5.81268
1	WT	IAA10nM	475	18	20	channel1:WT_NAA10nM_T0020_00006_CH4	2.758	0.406	0	100.886	0.587	0.022	0.675	3.99622
1	WT	IAA10nM	500	18	21	channel1:WT_NAA10nM_T0021_00006_CH4	2.768	0.344	0	101.944	0.588	0.032	0.825	5.81268
1	WT	IAA10nM	525	18	22	channel1:WT_NAA10nM_T0022_00006_CH4	2.77	0.344	0	102.155	0.585	0.034	0.9	6.17597
1	WT	IAA10nM	550	18	23	channel1:WT_NAA10nM_T0023_00006_CH4	2.774	0.344	0	101.479	0.587	0.038	0.975	6.90255
1	WT	IAA10nM	575	18	24	channel1:WT_NAA10nM_T0024_00006_CH4	2.776	0.344	0	101.689	0.587	0.04	1	7.26585
1	WT	IAA10nM	600	18	25	channel1:WT_NAA10nM_T0025_00006_CH4	2.776	0.344	0	101.689	0.588	0.04	0.925	7.26585
1	WT	IAA10nM	625	18	26	channel1:WT_NAA10nM_T0026_00006_CH4	2.77	0.344	0	102.155	0.588	0.034	0.9	6.17597
1	WT	IAA10nM	650	18	27	channel1:WT_NAA10nM_T0027_00006_CH4	2.774	0.344	0	101.479	0.588	0.038	0.9	6.90255
1	WT	IAA10nM	675	18	28	channel1:WT_NAA10nM_T0028_00006_CH4	2.77	0.344	0	102.155	0.588	0.034	0.9	6.17597
1	WT	IAA10nM	700	18	29	channel1:WT_NAA10nM_T0029_00006_CH4	2.774	0.354	0	101.479	0.587	0.038	0.975	6.90255
1	WT	IAA10nM	725	18	30	channel1:WT_NAA10nM_T0030_00006_CH4	2.776	0.354	0	101.689	0.588	0.04	1.0625	7.26585
1	WT	IAA10nM	750	18	31	channel1:WT_NAA10nM_T0031_00006_CH4	2.781	0.344	0	102.11	0.587	0.045	1.0375	8.17408
1	WT	IAA10nM	775	18	32	channel1:WT_NAA10nM_T0032_00006_CH4	2.774	0.354	0	101.479	0.587	0.038	1	6.90255
1	WT	IAA10nM	800	18	33	channel1:WT_NAA10nM_T0033_00006_CH4	2.778	0.354	0	101.9	0.587	0.042	1.025	7.62914
1	WT	IAA10nM	825	18	34	channel1:WT_NAA10nM_T0034_00006_CH4	2.776	0.354	0	101.689	0.588	0.04	1.025	7.26585
1	WT	IAA10nM	850	18	35	channel1:WT_NAA10nM_T0035_00006_CH4	2.778	0.354	0	101.9	0.588	0.042	1.1125	7.62914
1	WT	IAA10nM	875	18	36	channel1:WT_NAA10nM_T0036_00006_CH4	2.783	0.333	0	102.319	0.587	0.047	1.25	8.53737
1	WT	IAA10nM	900	18	37	channel1:WT_NAA10nM_T0037_00006_CH4	2.789	0.333	0	101.856	0.588	0.053	1.25	9.62725
1	WT	IAA10nM	925	18	38	channel1:WT_NAA10nM_T0038_00006_CH4	2.783	0.333	0	102.319	0.588	0.047	1.1125	8.53737
1	WT	IAA10nM	950	18	39	channel1:WT_NAA10nM_T0039_00006_CH4	2.778	0.344	0	101.9	0.587	0.042	1.125	7.62914
1	WT	IAA10nM	975	18	40	channel1:WT_NAA10nM_T0040_00006_CH4	2.784	0.365	0	101.436	0.587	0.048	1.2	8.71902
1	WT	IAA10nM	1000	18	41	channel1:WT_NAA10nM_T0041_00006_CH4	2.784	0.344	0	101.436	0.588	0.048	1.125	8.71902
1	WT	IAA10nM	1025	18	42	channel1:WT_NAA10nM_T0042_00006_CH4	2.778	0.396	0	100.804	0.587	0.042	1.025	7.62914
1	WT	IAA10nM	1050	18	43	channel1:WT_NAA10nM_T0043_00006_CH4	2.776	0.396	0	100.593	0.587	0.04	1.1375	7.26585
1	WT	IAA10nM	1075	18	44	channel1:WT_NAA10nM_T0044_00006_CH4	2.787	0.354	0	101.646	0.588	0.051	1.275	9.26395
1	WT	IAA10nM	1100	18	45	channel1:WT_NAA10nM_T0045_00006_CH4	2.787	0.354	0	101.646	0.589	0.051	1.275	9.26395
1	WT	IAA10nM	1125	18	46	channel1:WT_NAA10nM_T0046_00006_CH4	2.787	0.365	0	101.646	0.587	0.051	1.3	9.26395
1	WT	IAA10nM	1150	18	47	channel1:WT_NAA10nM_T0047_00006_CH4	2.789	0.354	0	101.856	0.588	0.053	1.4	9.62725
1	WT	IAA10nM	1175	18	48	channel1:WT_NAA10nM_T0048_00006_CH4	2.795	0.354	0	101.394	0.589	0.059	1.425	10.7171
1	WT	IAA10nM	1200	18	49	channel1:WT_NAA10nM_T0049_00006_CH4	2.791	0.344	0	102.065	0.587	0.055	1.375	9.99054
1	WT	IAA10nM	1225	18	50	channel1:WT_NAA10nM_T0050_00006_CH4	2.791	0.354	0	102.065	0.588	0.055	40.4875	9.99054
1	WT	IAA10nM	0	19	51	channel1-1:WT_NAA10nM_T0001_00006_CH4	2.186	1.469	2.021	67.59	1.28	0	0.125	0
1	WT	IAA10nM	25	19	52	channel1-1:WT_NAA10nM_T0002_00006_CH4	2.196	1.396	2	65.624	1.274	0.01	0.3	1.81646
1	WT	IAA10nM	50	19	53	channel1-1:WT_NAA10nM_T0003_00006_CH4	2.2	1.396	2	65.376	1.274	0.014	0.3	2.54305
1	WT	IAA10nM	75	19	54	channel1-1:WT_NAA10nM_T0004_00006_CH4	2.196	1.396	2	65.624	1.264	0.01	0.3	1.81646
1	WT	IAA10nM	100	19	55	channel1-1:WT_NAA10nM_T0005_00006_CH4	2.2	1.385	2	65.376	1.255	0.014	0.3	2.54305
1	WT	IAA10nM	125	19	56	channel1-1:WT_NAA10nM_T0006_00006_CH4	2.196	1.396	2	65.624	1.255	0.01	0.425	1.81646
1	WT	IAA10nM	150	19	57	channel1-1:WT_NAA10nM_T0007_00006_CH4	2.21	1.396	2.01	65.489	1.255	0.024	0.6	4.35951
1	WT	IAA10nM	175	19	58	channel1-1:WT_NAA10nM_T0008_00006_CH4	2.21	1.396	2.01	65.489	1.245	0.024	0.65	4.35951
1	WT	IAA10nM	200	19	59	channel1-1:WT_NAA10nM_T0009_00006_CH4	2.214	1.385	2.01	65.244	1.245	0.028	0.65	5.08609
1	WT	IAA10nM	225	19	60	channel1-1:WT_NAA10nM_T0010_00006_CH4	2.21	1.396	2.01	65.489	1.238	0.024	0.6625	4.35951
1	WT	IAA10nM	250	19	61	channel1-1:WT_NAA10nM_T0011_00006_CH4	2.215	1.406	2.021	65.846	1.237	0.029	0.775	5.26774
1	WT	IAA10nM	275	19	62	channel1-1:WT_NAA10nM_T0012_00006_CH4	2.219	1.396	2.021	65.601	1.227	0.033	0.825	5.99432
1	WT	IAA10nM	300	19	63	channel1-1:WT_NAA10nM_T0013_00006_CH4	2.219	1.396	2.021	65.601	1.216	0.033	0.875	5.99432
1	WT	IAA10nM	325	19	64	channel1-1:WT_NAA10nM_T0014_00006_CH4	2.223	1.385	2.021	65.356	1.216	0.037	0.7625	6.72091
1	WT	IAA10nM	350	19	65	channel1-1:WT_NAA10nM_T0015_00006_CH4	2.21	1.396	2.01	65.489	1.206	0.024	0.875	4.35951
1	WT	IAA10nM	375	19	66	channel1-1:WT_NAA10nM_T0016_00006_CH4	2.232	1.458	2.062	67.504	1.196	0.046	0.9875	8.35572
1	WT	IAA10nM	400	19	67	channel1-1:WT_NAA10nM_T0017_00006_CH4	2.219	1.396	2.021	65.601	1.196	0.033	0.825	5.99432
1	WT	IAA10nM	425	19	68	channel1-1:WT_NAA10nM_T0018_00006_CH4	2.219	1.396	2.021	65.601	1.186	0.033	0.7625	5.99432
1	WT	IAA10nM	450	19	69	channel1-1:WT_NAA10nM_T0019_00006_CH4	2.214	1.385	2.01	65.244	1.176	0.028	0.7	5.08609
1	WT	IAA10nM	475	19	70	channel1-1:WT_NAA10nM_T0020_00006_CH4	2.214	1.385	2.01	65.244	1.175	0.028	0.875	5.08609
1	WT	IAA10nM	500	19	71	channel1-1:WT_NAA10nM_T0021_00006_CH4	2.228	1.375	2.021	65.113	1.173	0.042	1.05	7.62914
1	WT	IAA10nM	525	19	72	channel1-1:WT_NAA10nM_T0022_00006_CH4	2.228	1.375	2.021	65.113	1.165	0.042	1.225	7.62914
1	WT	IAA10nM	550	19	73	channel1-1:WT_NAA10nM_T0023_00006_CH4	2.242	1.458	2.073	67.605	1.154	0.056	1.3375	10.1722
1	WT	IAA10nM	575	19	74	channel1-1:WT_NAA10nM_T0024_00006_CH4	2.237	1.375	2.031	65.225	1.153	0.051	1.3375	9.26395
1	WT	IAA10nM	600	19	75	channel1-1:WT_NAA10nM_T0025_00006_CH4	2.242	1.365	2.031	64.983	1.143	0.056	1.4	10.1722
1	WT	IAA10nM	625	19	76	channel1-1:WT_NAA10nM_T0026_00006_CH4	2.242	1.365	2.031	64.983	1.133	0.056	1.4	10.1722
1	WT	IAA10nM	650	19	77	channel1-1:WT_NAA10nM_T0027_00006_CH4	2.242	1.458	2.073	67.605	1.132	0.056	1.575	10.1722
1	WT	IAA10nM	675	19	78	channel1-1:WT_NAA10nM_T0028_00006_CH4	2.256	1.375	2.052	65.447	1.122	0.07	1.575	12.7152
1	WT	IAA10nM	700	19	79	channel1-1:WT_NAA10nM_T0029_00006_CH4	2.242	1.458	2.073	67.605	1.112	0.056	1.4625	10.1722
1	WT	IAA10nM	725	19	80	channel1-1:WT_NAA10nM_T0030_00006_CH4	2.247	1.375	2.042	65.336	1.113	0.061	1.4	11.0804
1	WT	IAA10nM	750	19	81	channel1-1:WT_NAA10nM_T0031_00006_CH4	2.237	1.375	2.031	65.225	1.102	0.051	1.275	9.26395
1	WT	IAA10nM	775	19	82	channel1-1:WT_NAA10nM_T0032_00006_CH4	2.237	1.375	2.031	65.225	1.091	0.051	1.5125	9.26395
1	WT	IAA10nM	800	19	83	channel1-1:WT_NAA10nM_T0033_00006_CH4	2.256	1.448	2.083	67.462	1.091	0.07	1.7	12.7152
1	WT	IAA10nM	825	19	84	channel1-1:WT_NAA10nM_T0034_00006_CH4	2.252	1.458	2.083	67.706	0.679	0.066	1.35	11.9886
1	WT	IAA10nM	850	19	85	channel1-1:WT_NAA10nM_T0035_00006_CH4	2.228	1.375	2.021	65.113	0.681	0.042	1.275	7.62914
1	WT	IAA10nM	875	19	86	channel1-1:WT_NAA10nM_T0036_00006_CH4	2.246	1.448	2.073	67.36	0.677	0.06	1.3875	10.8988
1	WT	IAA10nM	900	19	87	channel1-1:WT_NAA10nM_T0037_00006_CH4	2.237	1.365	2.031	65.225	0.675	0.051	1.5125	9.26395
1	WT	IAA10nM	925	19	88	channel1-1:WT_NAA10nM_T0038_00006_CH4	2.256	1.448	2.083	67.462	0.674	0.07	1.75	12.7152
1	WT	IAA10nM	950	19	89	channel1-1:WT_NAA10nM_T0039_00006_CH4	2.256	1.448	2.083	67.462	0.672	0.07	1.5125	12.7152
1	WT	IAA10nM	975	19	90	channel1-1:WT_NAA10nM_T0040_00006_CH4	2.237	1.375	2.031	65.225	0.677	0.051	1.3375	9.26395
1	WT	IAA10nM	1000	19	91	channel1-1:WT_NAA10nM_T0041_00006_CH4	2.242	1.458	2.073	67.605	0.677	0.056	1.5625	10.1722
1	WT	IAA10nM	1025	19	92	channel1-1:WT_NAA10nM_T0042_00006_CH4	2.255	1.354	2.042	64.855	0.674	0.069	2.025	12.5336
1	WT	IAA10nM	1050	19	93	channel1-1:WT_NAA10nM_T0043_00006_CH4	2.279	1.365	2.073	65.426	0.676	0.093	1.975	16.8931
1	WT	IAA10nM	1075	19	94	channel1-1:WT_NAA10nM_T0044_00006_CH4	2.251	1.365	2.042	65.095	0.675	0.065	1.7375	11.807
1	WT	IAA10nM	1100	19	95	channel1-1:WT_NAA10nM_T0045_00006_CH4	2.26	1.365	2.052	65.206	0.675	0.074	1.9125	13.4418
1	WT	IAA10nM	1125	19	96	channel1-1:WT_NAA10nM_T0046_00006_CH4	2.265	1.354	2.052	64.967	0.673	0.079	1.9125	14.35
1	WT	IAA10nM	1150	19	97	channel1-1:WT_NAA10nM_T0047_00006_CH4	2.26	1.365	2.052	65.206	0.674	0.074	1.85	13.4418
1	WT	IAA10nM	1175	19	98	channel1-1:WT_NAA10nM_T0048_00006_CH4	2.26	1.365	2.052	65.206	0.673	0.074	1.85	13.4418
1	WT	IAA10nM	1200	19	99	channel1-1:WT_NAA10nM_T0049_00006_CH4	2.26	1.365	2.052	65.206	0.674	0.074	1.85	13.4418
1	WT	IAA10nM	1225	19	100	channel1-1:WT_NAA10nM_T0050_00006_CH4	2.26	1.365	2.052	65.206	0.675	0.074	57.625	13.4418
1	WT	IAA10nM	0	20	1	channel1:WT_NAA10nM_T0001_00007_CH4	4.079	1.104	4.052	83.401	1.515	0	-0.325	0
1	WT	IAA10nM	25	20	2	channel1:WT_NAA10nM_T0002_00007_CH4	4.053	1.062	4.021	82.765	1.518	-0.026	-0.4375	-4.7228
1	WT	IAA10nM	50	20	3	channel1:WT_NAA10nM_T0003_00007_CH4	4.07	1.083	4.042	83.239	1.505	-0.009	-0.0125	-1.63482
1	WT	IAA10nM	75	20	4	channel1:WT_NAA10nM_T0004_00007_CH4	4.087	1.115	4.062	83.708	1.504	0.008	0.1125	1.45317
1	WT	IAA10nM	100	20	5	channel1:WT_NAA10nM_T0005_00007_CH4	4.08	1.083	4.052	83.256	1.495	0.001	0.225	0.181646
1	WT	IAA10nM	125	20	6	channel1:WT_NAA10nM_T0006_00007_CH4	4.096	1.125	4.073	83.869	1.495	0.017	0.4625	3.08798
1	WT	IAA10nM	150	20	7	channel1:WT_NAA10nM_T0007_00007_CH4	4.099	1.104	4.073	83.579	1.495	0.02	0.4	3.63292
1	WT	IAA10nM	175	20	8	channel1:WT_NAA10nM_T0008_00007_CH4	4.091	1.094	4.062	83.273	1.481	0.012	0.3625	2.17975
1	WT	IAA10nM	200	20	9	channel1:WT_NAA10nM_T0009_00007_CH4	4.096	1.125	4.073	83.869	1.482	0.017	0.5625	3.08798
1	WT	IAA10nM	225	20	10	channel1:WT_NAA10nM_T0010_00007_CH4	4.107	1.115	4.083	83.884	1.481	0.028	0.7	5.08609
1	WT	IAA10nM	250	20	11	channel1:WT_NAA10nM_T0011_00007_CH4	4.107	1.115	4.083	83.884	1.474	0.028	0.7125	5.08609
1	WT	IAA10nM	275	20	12	channel1:WT_NAA10nM_T0012_00007_CH4	4.108	1.104	4.083	83.74	1.464	0.029	0.7625	5.26774
1	WT	IAA10nM	300	20	13	channel1:WT_NAA10nM_T0013_00007_CH4	4.111	1.094	4.083	83.307	1.469	0.032	0.8	5.81268
1	WT	IAA10nM	325	20	14	channel1:WT_NAA10nM_T0014_00007_CH4	4.111	1.094	4.083	83.307	1.453	0.032	0.7875	5.81268
1	WT	IAA10nM	350	20	15	channel1:WT_NAA10nM_T0015_00007_CH4	4.11	1.094	4.083	83.451	1.453	0.031	0.6125	5.63103
1	WT	IAA10nM	375	20	16	channel1:WT_NAA10nM_T0016_00007_CH4	4.097	1.104	4.073	83.724	1.453	0.018	0.7	3.26963
1	WT	IAA10nM	400	20	17	channel1:WT_NAA10nM_T0017_00007_CH4	4.117	1.115	4.094	83.9	1.446	0.038	0.675	6.90255
1	WT	IAA10nM	425	20	18	channel1:WT_NAA10nM_T0018_00007_CH4	4.095	1.146	4.073	84.014	1.441	0.016	0.4	2.90634
1	WT	IAA10nM	450	20	19	channel1:WT_NAA10nM_T0019_00007_CH4	4.095	1.146	4.073	84.014	1.432	0.016	0.6	2.90634
1	WT	IAA10nM	475	20	20	channel1:WT_NAA10nM_T0020_00007_CH4	4.111	1.094	4.083	83.307	1.436	0.032	0.7625	5.81268
1	WT	IAA10nM	500	20	21	channel1:WT_NAA10nM_T0021_00007_CH4	4.108	1.104	4.083	83.74	1.423	0.029	0.7625	5.26774
1	WT	IAA10nM	525	20	22	channel1:WT_NAA10nM_T0022_00007_CH4	4.111	1.083	4.083	83.307	1.422	0.032	0.825	5.81268
1	WT	IAA10nM	550	20	23	channel1:WT_NAA10nM_T0023_00007_CH4	4.113	1.156	4.094	84.477	1.417	0.034	0.8	6.17597
1	WT	IAA10nM	575	20	24	channel1:WT_NAA10nM_T0024_00007_CH4	4.109	1.104	4.083	83.596	1.41	0.03	1.1	5.44939
1	WT	IAA10nM	600	20	25	channel1:WT_NAA10nM_T0025_00007_CH4	4.137	1.125	4.115	84.074	1.401	0.058	1.35	10.5355
1	WT	IAA10nM	625	20	26	channel1:WT_NAA10nM_T0026_00007_CH4	4.129	1.104	4.104	83.772	1.402	0.05	1.3375	9.08231
1	WT	IAA10nM	650	20	27	channel1:WT_NAA10nM_T0027_00007_CH4	4.136	1.135	4.115	84.218	1.395	0.057	1.2625	10.3538
1	WT	IAA10nM	675	20	28	channel1:WT_NAA10nM_T0028_00007_CH4	4.123	1.156	4.104	84.491	1.394	0.044	1.0375	7.99243
1	WT	IAA10nM	700	20	29	channel1:WT_NAA10nM_T0029_00007_CH4	4.118	1.104	4.094	83.756	1.383	0.039	1.025	7.0842
1	WT	IAA10nM	725	20	30	channel1:WT_NAA10nM_T0030_00007_CH4	4.122	1.167	4.104	84.635	1.384	0.043	1.1125	7.81079
1	WT	IAA10nM	750	20	31	channel1:WT_NAA10nM_T0031_00007_CH4	4.125	1.156	4.104	84.203	1.383	0.046	1.275	8.35572
1	WT	IAA10nM	775	20	32	channel1:WT_NAA10nM_T0032_00007_CH4	4.135	1.146	4.115	84.361	1.374	0.056	1.5625	10.1722
1	WT	IAA10nM	800	20	33	channel1:WT_NAA10nM_T0033_00007_CH4	4.148	1.115	4.125	83.946	1.367	0.069	1.5	12.5336
1	WT	IAA10nM	825	20	34	channel1:WT_NAA10nM_T0034_00007_CH4	4.13	1.115	4.104	83.628	1.363	0.051	1.3375	9.26395
1	WT	IAA10nM	850	20	35	channel1:WT_NAA10nM_T0035_00007_CH4	4.135	1.167	4.115	84.361	1.358	0.056	1.3375	10.1722
1	WT	IAA10nM	875	20	36	channel1:WT_NAA10nM_T0036_00007_CH4	4.13	1.115	4.104	83.628	1.354	0.051	1.2625	9.26395
1	WT	IAA10nM	900	20	37	channel1:WT_NAA10nM_T0037_00007_CH4	4.129	1.115	4.104	83.772	1.346	0.05	1.2625	9.08231
1	WT	IAA10nM	925	20	38	channel1:WT_NAA10nM_T0038_00007_CH4	4.13	1.115	4.104	83.628	1.34	0.051	1.3875	9.26395
1	WT	IAA10nM	950	20	39	channel1:WT_NAA10nM_T0039_00007_CH4	4.139	1.135	4.115	83.787	1.328	0.06	1.625	10.8988
1	WT	IAA10nM	975	20	40	channel1:WT_NAA10nM_T0040_00007_CH4	4.149	1.135	4.125	83.803	1.325	0.07	1.7875	12.7152
1	WT	IAA10nM	1000	20	41	channel1:WT_NAA10nM_T0041_00007_CH4	4.152	1.115	4.125	83.517	1.319	0.073	1.7625	13.2602
1	WT	IAA10nM	1025	20	42	channel1:WT_NAA10nM_T0042_00007_CH4	4.147	1.125	4.125	84.089	1.312	0.068	1.8875	12.3519
1	WT	IAA10nM	1050	20	43	channel1:WT_NAA10nM_T0043_00007_CH4	4.162	1.115	4.135	83.533	1.311	0.083	1.9125	15.0766
1	WT	IAA10nM	1075	20	44	channel1:WT_NAA10nM_T0044_00007_CH4	4.149	1.104	4.125	83.803	1.301	0.07	1.9875	12.7152
1	WT	IAA10nM	1100	20	45	channel1:WT_NAA10nM_T0045_00007_CH4	4.168	1.125	4.146	84.118	1.291	0.089	1.9125	16.1665
1	WT	IAA10nM	1125	20	46	channel1:WT_NAA10nM_T0046_00007_CH4	4.143	1.167	4.125	84.662	1.285	0.064	1.825	11.6254
1	WT	IAA10nM	1150	20	47	channel1:WT_NAA10nM_T0047_00007_CH4	4.161	1.115	4.135	83.676	1.281	0.082	1.8875	14.895
1	WT	IAA10nM	1175	20	48	channel1:WT_NAA10nM_T0048_00007_CH4	4.148	1.115	4.125	83.946	1.271	0.069	1.825	12.5336
1	WT	IAA10nM	1200	20	49	channel1:WT_NAA10nM_T0049_00007_CH4	4.156	1.167	4.135	84.247	1.269	0.077	2.1	13.9868
1	WT	IAA10nM	1225	20	50	channel1:WT_NAA10nM_T0050_00007_CH4	4.17	1.125	4.146	83.834	1.258	0.091	50.9125	16.5298
1	WT	IAA10nM	0	21	1	channel1:WT_NAA10nM_T0001_00008_CH4	2.915	1.188	2.865	79.292	1.458	0	0.1625	0
1	WT	IAA10nM	25	21	2	channel1:WT_NAA10nM_T0002_00008_CH4	2.928	1.198	2.875	79.13	1.448	0.013	0.2375	2.3614
1	WT	IAA10nM	50	21	3	channel1:WT_NAA10nM_T0003_00008_CH4	2.921	1.177	2.865	78.69	1.438	0.006	0.2375	1.08988
1	WT	IAA10nM	75	21	4	channel1:WT_NAA10nM_T0004_00008_CH4	2.928	1.198	2.875	79.13	1.427	0.013	0.325	2.3614
1	WT	IAA10nM	100	21	5	channel1:WT_NAA10nM_T0005_00008_CH4	2.928	1.198	2.875	79.13	1.423	0.013	0.35	2.3614
1	WT	IAA10nM	125	21	6	channel1:WT_NAA10nM_T0006_00008_CH4	2.93	1.188	2.875	78.93	1.415	0.015	0.4	2.72469
1	WT	IAA10nM	150	21	7	channel1:WT_NAA10nM_T0007_00008_CH4	2.932	1.177	2.875	78.73	1.406	0.017	0.475	3.08798
1	WT	IAA10nM	175	21	8	channel1:WT_NAA10nM_T0008_00008_CH4	2.936	1.198	2.885	79.368	1.395	0.021	0.525	3.81457
1	WT	IAA10nM	200	21	9	channel1:WT_NAA10nM_T0009_00008_CH4	2.936	1.188	2.885	79.368	1.388	0.021	0.55	3.81457
1	WT	IAA10nM	225	21	10	channel1:WT_NAA10nM_T0010_00008_CH4	2.938	1.188	2.885	79.168	1.374	0.023	0.65	4.17786
1	WT	IAA10nM	250	21	11	channel1:WT_NAA10nM_T0011_00008_CH4	2.944	1.208	2.896	79.604	1.369	0.029	0.8	5.26774
1	WT	IAA10nM	275	21	12	channel1:WT_NAA10nM_T0012_00008_CH4	2.95	1.177	2.896	79.007	1.361	0.035	0.875	6.35762
1	WT	IAA10nM	300	21	13	channel1:WT_NAA10nM_T0013_00008_CH4	2.95	1.177	2.896	79.007	1.348	0.035	0.85	6.35762
1	WT	IAA10nM	325	21	14	channel1:WT_NAA10nM_T0014_00008_CH4	2.948	1.188	2.896	79.206	1.336	0.033	0.825	5.99432
1	WT	IAA10nM	350	21	15	channel1:WT_NAA10nM_T0015_00008_CH4	2.948	1.188	2.896	79.206	1.33	0.033	0.85	5.99432
1	WT	IAA10nM	375	21	16	channel1:WT_NAA10nM_T0016_00008_CH4	2.95	1.188	2.896	79.007	1.267	0.035	0.775	6.35762
1	WT	IAA10nM	400	21	17	channel1:WT_NAA10nM_T0017_00008_CH4	2.942	1.188	2.885	78.77	1.208	0.027	0.775	4.90445
1	WT	IAA10nM	425	21	18	channel1:WT_NAA10nM_T0018_00008_CH4	2.95	1.198	2.896	79.007	1.173	0.035	0.9	6.35762
1	WT	IAA10nM	450	21	19	channel1:WT_NAA10nM_T0019_00008_CH4	2.952	1.188	2.896	78.809	1.154	0.037	0.925	6.72091
1	WT	IAA10nM	475	21	20	channel1:WT_NAA10nM_T0020_00008_CH4	2.952	1.188	2.896	78.809	1.143	0.037	0.875	6.72091
1	WT	IAA10nM	500	21	21	channel1:WT_NAA10nM_T0021_00008_CH4	2.948	1.198	2.896	79.206	1.126	0.033	0.85	5.99432
1	WT	IAA10nM	525	21	22	channel1:WT_NAA10nM_T0022_00008_CH4	2.95	1.198	2.896	79.007	1.115	0.035	0.8	6.35762
1	WT	IAA10nM	550	21	23	channel1:WT_NAA10nM_T0023_00008_CH4	2.944	1.188	2.885	78.571	1.105	0.029	0.725	5.26774
1	WT	IAA10nM	575	21	24	channel1:WT_NAA10nM_T0024_00008_CH4	2.944	1.188	2.885	78.571	1.095	0.029	0.85	5.26774
1	WT	IAA10nM	600	21	25	channel1:WT_NAA10nM_T0025_00008_CH4	2.954	1.188	2.896	78.611	1.084	0.039	0.95	7.0842
1	WT	IAA10nM	625	21	26	channel1:WT_NAA10nM_T0026_00008_CH4	2.952	1.188	2.896	78.809	1.072	0.037	0.925	6.72091
1	WT	IAA10nM	650	21	27	channel1:WT_NAA10nM_T0027_00008_CH4	2.952	1.188	2.896	78.809	1.062	0.037	0.975	6.72091
1	WT	IAA10nM	675	21	28	channel1:WT_NAA10nM_T0028_00008_CH4	2.956	1.177	2.896	78.413	1.053	0.041	1.125	7.44749
1	WT	IAA10nM	700	21	29	channel1:WT_NAA10nM_T0029_00008_CH4	2.964	1.188	2.906	78.651	1.044	0.049	1.075	8.90066
1	WT	IAA10nM	725	21	30	channel1:WT_NAA10nM_T0030_00008_CH4	2.952	1.177	2.896	78.809	1.041	0.037	1.1	6.72091
1	WT	IAA10nM	750	21	31	channel1:WT_NAA10nM_T0031_00008_CH4	2.966	1.188	2.906	78.453	1.035	0.051	1.15	9.26395
1	WT	IAA10nM	775	21	32	channel1:WT_NAA10nM_T0032_00008_CH4	2.956	1.177	2.896	78.413	1.027	0.041	1.1	7.44749
1	WT	IAA10nM	800	21	33	channel1:WT_NAA10nM_T0033_00008_CH4	2.962	1.188	2.906	78.848	0.674	0.047	1.05	8.53737
1	WT	IAA10nM	825	21	34	channel1:WT_NAA10nM_T0034_00008_CH4	2.952	1.177	2.896	78.809	0.674	0.037	0.9	6.72091
1	WT	IAA10nM	850	21	35	channel1:WT_NAA10nM_T0035_00008_CH4	2.95	1.177	2.896	79.007	0.671	0.035	0.9	6.35762
1	WT	IAA10nM	875	21	36	channel1:WT_NAA10nM_T0036_00008_CH4	2.952	1.177	2.896	78.809	0.674	0.037	0.975	6.72091
1	WT	IAA10nM	900	21	37	channel1:WT_NAA10nM_T0037_00008_CH4	2.956	1.198	2.906	79.442	0.673	0.041	1.05	7.44749
1	WT	IAA10nM	925	21	38	channel1:WT_NAA10nM_T0038_00008_CH4	2.958	1.188	2.906	79.244	0.675	0.043	1.125	7.81079
1	WT	IAA10nM	950	21	39	channel1:WT_NAA10nM_T0039_00008_CH4	2.962	1.188	2.906	78.848	0.673	0.047	1.175	8.53737
1	WT	IAA10nM	975	21	40	channel1:WT_NAA10nM_T0040_00008_CH4	2.962	1.188	2.906	78.848	0.674	0.047	1.175	8.53737
1	WT	IAA10nM	1000	21	41	channel1:WT_NAA10nM_T0041_00008_CH4	2.962	1.177	2.906	78.848	0.673	0.047	1.25	8.53737
1	WT	IAA10nM	1025	21	42	channel1:WT_NAA10nM_T0042_00008_CH4	2.968	1.198	2.917	79.282	0.674	0.053	1.425	9.62725
1	WT	IAA10nM	1050	21	43	channel1:WT_NAA10nM_T0043_00008_CH4	2.976	1.177	2.917	78.493	0.674	0.061	1.5875	11.0804
1	WT	IAA10nM	1075	21	44	channel1:WT_NAA10nM_T0044_00008_CH4	2.981	1.188	2.927	79.122	0.674	0.066	1.625	11.9886
1	WT	IAA10nM	1100	21	45	channel1:WT_NAA10nM_T0045_00008_CH4	2.979	1.198	2.927	79.319	0.674	0.064	1.4625	11.6254
1	WT	IAA10nM	1125	21	46	channel1:WT_NAA10nM_T0046_00008_CH4	2.968	1.198	2.917	79.282	0.669	0.053	1.35	9.62725
1	WT	IAA10nM	1150	21	47	channel1:WT_NAA10nM_T0047_00008_CH4	2.97	1.188	2.917	79.084	0.671	0.055	1.4	9.99054
1	WT	IAA10nM	1175	21	48	channel1:WT_NAA10nM_T0048_00008_CH4	2.972	1.177	2.917	78.887	0.673	0.057	1.45	10.3538
1	WT	IAA10nM	1200	21	49	channel1:WT_NAA10nM_T0049_00008_CH4	2.974	1.177	2.917	78.69	0.669	0.059	1.45	10.7171
1	WT	IAA10nM	1225	21	50	channel1:WT_NAA10nM_T0050_00008_CH4	2.972	1.188	2.917	78.887	0.673	0.057	45.3375	10.3538
1	WT	IAA10nM	0	22	1	channel1-1:WT_NAA10nM_T0001_00008_CH4	3.944	1.062	3.812	75.156	0.641	0	0.25	0
1	WT	IAA10nM	25	22	2	channel1-1:WT_NAA10nM_T0002_00008_CH4	3.964	1.062	3.833	75.233	0.643	0.02	0.375	3.63292
1	WT	IAA10nM	50	22	3	channel1-1:WT_NAA10nM_T0003_00008_CH4	3.954	1.062	3.823	75.195	0.641	0.01	0.1625	1.81646
1	WT	IAA10nM	75	22	4	channel1-1:WT_NAA10nM_T0004_00008_CH4	3.947	1.052	3.812	75.01	0.642	0.003	0.325	0.544939
1	WT	IAA10nM	100	22	5	channel1-1:WT_NAA10nM_T0005_00008_CH4	3.967	1.094	3.844	75.708	0.643	0.023	0.7	4.17786
1	WT	IAA10nM	125	22	6	channel1-1:WT_NAA10nM_T0006_00008_CH4	3.977	1.052	3.844	75.127	0.642	0.033	0.7	5.99432
1	WT	IAA10nM	150	22	7	channel1-1:WT_NAA10nM_T0007_00008_CH4	3.967	1.094	3.844	75.708	0.643	0.023	0.6375	4.17786
1	WT	IAA10nM	175	22	8	channel1-1:WT_NAA10nM_T0008_00008_CH4	3.972	1.073	3.844	75.417	0.645	0.028	0.6375	5.08609
1	WT	IAA10nM	200	22	9	channel1-1:WT_NAA10nM_T0009_00008_CH4	3.967	1.052	3.833	75.088	0.645	0.023	0.7875	4.17786
1	WT	IAA10nM	225	22	10	channel1-1:WT_NAA10nM_T0010_00008_CH4	3.984	1.073	3.854	75.31	0.644	0.04	0.825	7.26585
1	WT	IAA10nM	250	22	11	channel1-1:WT_NAA10nM_T0011_00008_CH4	3.97	1.042	3.833	74.943	0.644	0.026	1.025	4.7228
1	WT	IAA10nM	275	22	12	channel1-1:WT_NAA10nM_T0012_00008_CH4	4	1.042	3.865	75.059	0.643	0.056	1.275	10.1722
1	WT	IAA10nM	300	22	13	channel1-1:WT_NAA10nM_T0013_00008_CH4	3.99	1.042	3.854	75.02	0.643	0.046	1.05	8.35572
1	WT	IAA10nM	325	22	14	channel1-1:WT_NAA10nM_T0014_00008_CH4	3.982	1.031	3.844	74.837	0.645	0.038	0.95	6.90255
1	WT	IAA10nM	350	22	15	channel1-1:WT_NAA10nM_T0015_00008_CH4	3.982	1.031	3.844	74.837	0.646	0.038	1.175	6.90255
1	WT	IAA10nM	375	22	16	channel1-1:WT_NAA10nM_T0016_00008_CH4	4	1.042	3.865	75.059	0.645	0.056	1.4	10.1722
1	WT	IAA10nM	400	22	17	channel1-1:WT_NAA10nM_T0017_00008_CH4	4	1.042	3.865	75.059	0.646	0.056	1.3625	10.1722
1	WT	IAA10nM	425	22	18	channel1-1:WT_NAA10nM_T0018_00008_CH4	3.997	1.062	3.865	75.203	0.645	0.053	1.3625	9.62725
1	WT	IAA10nM	450	22	19	channel1-1:WT_NAA10nM_T0019_00008_CH4	4	1.042	3.865	75.059	0.645	0.056	1.5625	10.1722
1	WT	IAA10nM	475	22	20	channel1-1:WT_NAA10nM_T0020_00008_CH4	4.013	1.031	3.875	74.954	0.645	0.069	1.65	12.5336
1	WT	IAA10nM	500	22	21	channel1-1:WT_NAA10nM_T0021_00008_CH4	4.007	1.062	3.875	75.241	0.645	0.063	1.55	11.4437
1	WT	IAA10nM	525	22	22	channel1-1:WT_NAA10nM_T0022_00008_CH4	4.005	1.062	3.875	75.385	0.644	0.061	1.525	11.0804
1	WT	IAA10nM	550	22	23	channel1-1:WT_NAA10nM_T0023_00008_CH4	4.005	1.062	3.875	75.385	0.645	0.061	1.55	11.0804
1	WT	IAA10nM	575	22	24	channel1-1:WT_NAA10nM_T0024_00008_CH4	4.007	1.052	3.875	75.241	0.645	0.063	1.575	11.4437
1	WT	IAA10nM	600	22	25	channel1-1:WT_NAA10nM_T0025_00008_CH4	4.007	1.052	3.875	75.241	0.644	0.063	1.5125	11.4437
1	WT	IAA10nM	625	22	26	channel1-1:WT_NAA10nM_T0026_00008_CH4	4.002	1.073	3.875	75.53	0.645	0.058	1.425	10.5355
1	WT	IAA10nM	650	22	27	channel1-1:WT_NAA10nM_T0027_00008_CH4	4	1.042	3.865	75.059	0.644	0.056	1.525	10.1722
1	WT	IAA10nM	675	22	28	channel1-1:WT_NAA10nM_T0028_00008_CH4	4.01	1.042	3.875	75.097	0.645	0.066	1.7375	11.9886
1	WT	IAA10nM	700	22	29	channel1-1:WT_NAA10nM_T0029_00008_CH4	4.017	1.052	3.885	75.279	0.645	0.073	1.7	13.2602
1	WT	IAA10nM	725	22	30	channel1-1:WT_NAA10nM_T0030_00008_CH4	4.007	1.052	3.875	75.241	0.645	0.063	1.6125	11.4437
1	WT	IAA10nM	750	22	31	channel1-1:WT_NAA10nM_T0031_00008_CH4	4.01	1.042	3.875	75.097	0.646	0.066	1.65	11.9886
1	WT	IAA10nM	775	22	32	channel1-1:WT_NAA10nM_T0032_00008_CH4	4.01	1.042	3.875	75.097	0.647	0.066	1.6875	11.9886
1	WT	IAA10nM	800	22	33	channel1-1:WT_NAA10nM_T0033_00008_CH4	4.013	1.031	3.875	74.954	0.646	0.069	1.6875	12.5336
1	WT	IAA10nM	825	22	34	channel1-1:WT_NAA10nM_T0034_00008_CH4	4.01	1.042	3.875	75.097	0.647	0.066	1.775	11.9886
1	WT	IAA10nM	850	22	35	channel1-1:WT_NAA10nM_T0035_00008_CH4	4.02	1.042	3.885	75.136	0.649	0.076	1.8625	13.8051
1	WT	IAA10nM	875	22	36	channel1-1:WT_NAA10nM_T0036_00008_CH4	4.017	1.052	3.885	75.279	0.646	0.073	1.775	13.2602
1	WT	IAA10nM	900	22	37	channel1-1:WT_NAA10nM_T0037_00008_CH4	4.013	1.031	3.875	74.954	0.647	0.069	1.65	12.5336
1	WT	IAA10nM	925	22	38	channel1-1:WT_NAA10nM_T0038_00008_CH4	4.007	1.052	3.875	75.241	0.647	0.063	1.575	11.4437
1	WT	IAA10nM	950	22	39	channel1-1:WT_NAA10nM_T0039_00008_CH4	4.007	1.052	3.875	75.241	0.646	0.063	1.6125	11.4437
1	WT	IAA10nM	975	22	40	channel1-1:WT_NAA10nM_T0040_00008_CH4	4.01	1.042	3.875	75.097	0.648	0.066	1.7125	11.9886
1	WT	IAA10nM	1000	22	41	channel1-1:WT_NAA10nM_T0041_00008_CH4	4.015	1.062	3.885	75.423	0.649	0.071	1.675	12.8969
1	WT	IAA10nM	1025	22	42	channel1-1:WT_NAA10nM_T0042_00008_CH4	4.007	1.052	3.875	75.241	0.648	0.063	1.65	11.4437
1	WT	IAA10nM	1050	22	43	channel1-1:WT_NAA10nM_T0043_00008_CH4	4.013	1.031	3.875	74.954	0.647	0.069	1.775	12.5336
1	WT	IAA10nM	1075	22	44	channel1-1:WT_NAA10nM_T0044_00008_CH4	4.017	1.052	3.885	75.279	0.648	0.073	1.8	13.2602
1	WT	IAA10nM	1100	22	45	channel1-1:WT_NAA10nM_T0045_00008_CH4	4.015	1.062	3.885	75.423	0.649	0.071	1.7125	12.8969
1	WT	IAA10nM	1125	22	46	channel1-1:WT_NAA10nM_T0046_00008_CH4	4.01	1.042	3.875	75.097	0.649	0.066	1.8125	11.9886
1	WT	IAA10nM	1150	22	47	channel1-1:WT_NAA10nM_T0047_00008_CH4	4.023	1.031	3.885	74.992	0.647	0.079	2.0625	14.35
1	WT	IAA10nM	1175	22	48	channel1-1:WT_NAA10nM_T0048_00008_CH4	4.03	1.042	3.896	75.174	0.648	0.086	2.15	15.6216
1	WT	IAA10nM	1200	22	49	channel1-1:WT_NAA10nM_T0049_00008_CH4	4.03	1.042	3.896	75.174	0.648	0.086	2.15	15.6216
1	WT	IAA10nM	1225	22	50	channel1-1:WT_NAA10nM_T0050_00008_CH4	4.03	1.042	3.896	75.174	0.648	0.086	67.7	15.6216
1	WT	IAA10nM	0	23	1	channel1:WT_NAA10nM_T0001_00009_CH4	2.32	0.802	2.302	82.779	0.417	0	0	0
1	WT	IAA10nM	25	23	2	channel1:WT_NAA10nM_T0002_00009_CH4	2.32	0.802	2.302	82.779	0.417	0	0	0
1	WT	IAA10nM	50	23	3	channel1:WT_NAA10nM_T0003_00009_CH4	2.32	0.802	2.302	82.779	0.406	0	0.2625	0
1	WT	IAA10nM	75	23	4	channel1:WT_NAA10nM_T0004_00009_CH4	2.341	0.802	2.323	82.843	0.417	0.021	0.4	3.81457
1	WT	IAA10nM	100	23	5	channel1:WT_NAA10nM_T0005_00009_CH4	2.331	0.802	2.312	82.811	0.417	0.011	0.5125	1.99811
1	WT	IAA10nM	125	23	6	channel1:WT_NAA10nM_T0006_00009_CH4	2.35	0.812	2.333	83.127	0.406	0.03	0.7375	5.44939
1	WT	IAA10nM	150	23	7	channel1:WT_NAA10nM_T0007_00009_CH4	2.349	0.823	2.333	83.379	0.406	0.029	0.8375	5.26774
1	WT	IAA10nM	175	23	8	channel1:WT_NAA10nM_T0008_00009_CH4	2.358	0.833	2.344	83.66	0.406	0.038	0.9625	6.90255
1	WT	IAA10nM	200	23	9	channel1:WT_NAA10nM_T0009_00009_CH4	2.359	0.823	2.344	83.408	0.406	0.039	0.8625	7.0842
1	WT	IAA10nM	225	23	10	channel1:WT_NAA10nM_T0010_00009_CH4	2.35	0.812	2.333	83.127	0.406	0.03	0.75	5.44939
1	WT	IAA10nM	250	23	11	channel1:WT_NAA10nM_T0011_00009_CH4	2.35	0.812	2.333	83.127	0.406	0.03	0.8375	5.44939
1	WT	IAA10nM	275	23	12	channel1:WT_NAA10nM_T0012_00009_CH4	2.357	0.844	2.344	83.911	0.406	0.037	1.0375	6.72091
1	WT	IAA10nM	300	23	13	channel1:WT_NAA10nM_T0013_00009_CH4	2.366	0.854	2.354	84.189	0.406	0.046	1.1875	8.35572
1	WT	IAA10nM	325	23	14	channel1:WT_NAA10nM_T0014_00009_CH4	2.369	0.833	2.354	83.688	0.406	0.049	0.9875	8.90066
1	WT	IAA10nM	350	23	15	channel1:WT_NAA10nM_T0015_00009_CH4	2.35	0.812	2.333	83.127	0.406	0.03	0.9875	5.44939
1	WT	IAA10nM	375	23	16	channel1:WT_NAA10nM_T0016_00009_CH4	2.369	0.833	2.354	83.688	0.406	0.049	1.1	8.90066
1	WT	IAA10nM	400	23	17	channel1:WT_NAA10nM_T0017_00009_CH4	2.359	0.823	2.344	83.408	0.406	0.039	1.275	7.0842
1	WT	IAA10nM	425	23	18	channel1:WT_NAA10nM_T0018_00009_CH4	2.383	0.802	2.365	82.968	0.406	0.063	1.2625	11.4437
1	WT	IAA10nM	450	23	19	channel1:WT_NAA10nM_T0019_00009_CH4	2.358	0.833	2.344	83.66	0.406	0.038	1.1125	6.90255
1	WT	IAA10nM	475	23	20	channel1:WT_NAA10nM_T0020_00009_CH4	2.371	0.812	2.354	83.187	0.406	0.051	1.3625	9.26395
1	WT	IAA10nM	500	23	21	channel1:WT_NAA10nM_T0021_00009_CH4	2.378	0.844	2.365	83.965	0.406	0.058	1.45	10.5355
1	WT	IAA10nM	525	23	22	channel1:WT_NAA10nM_T0022_00009_CH4	2.378	0.844	2.365	83.965	0.406	0.058	1.3625	10.5355
1	WT	IAA10nM	550	23	23	channel1:WT_NAA10nM_T0023_00009_CH4	2.371	0.812	2.354	83.187	0.406	0.051	1.2625	9.26395
1	WT	IAA10nM	575	23	24	channel1:WT_NAA10nM_T0024_00009_CH4	2.37	0.823	2.354	83.437	0.406	0.05	1.2625	9.08231
1	WT	IAA10nM	600	23	25	channel1:WT_NAA10nM_T0025_00009_CH4	2.371	0.812	2.354	83.187	0.417	0.051	1.425	9.26395
1	WT	IAA10nM	625	23	26	channel1:WT_NAA10nM_T0026_00009_CH4	2.383	0.802	2.365	82.968	0.406	0.063	1.5125	11.4437
1	WT	IAA10nM	650	23	27	channel1:WT_NAA10nM_T0027_00009_CH4	2.378	0.844	2.365	83.965	0.417	0.058	1.1125	10.5355
1	WT	IAA10nM	675	23	28	channel1:WT_NAA10nM_T0028_00009_CH4	2.351	0.802	2.333	82.875	0.406	0.031	1.125	5.63103
1	WT	IAA10nM	700	23	29	channel1:WT_NAA10nM_T0029_00009_CH4	2.379	0.833	2.365	83.715	0.417	0.059	1.4625	10.7171
1	WT	IAA10nM	725	23	30	channel1:WT_NAA10nM_T0030_00009_CH4	2.378	0.844	2.365	83.965	0.417	0.058	1.2125	10.5355
1	WT	IAA10nM	750	23	31	channel1:WT_NAA10nM_T0031_00009_CH4	2.359	0.823	2.344	83.408	0.417	0.039	1.2375	7.0842
1	WT	IAA10nM	775	23	32	channel1:WT_NAA10nM_T0032_00009_CH4	2.38	0.823	2.365	83.466	0.417	0.06	1.1625	10.8988
1	WT	IAA10nM	800	23	33	channel1:WT_NAA10nM_T0033_00009_CH4	2.353	0.792	2.333	82.623	0.417	0.033	0.9875	5.99432
1	WT	IAA10nM	825	23	34	channel1:WT_NAA10nM_T0034_00009_CH4	2.366	0.854	2.354	84.189	0.406	0.046	0.95	8.35572
1	WT	IAA10nM	850	23	35	channel1:WT_NAA10nM_T0035_00009_CH4	2.35	0.812	2.333	83.127	0.417	0.03	1.2375	5.44939
1	WT	IAA10nM	875	23	36	channel1:WT_NAA10nM_T0036_00009_CH4	2.389	0.833	2.375	83.743	0.417	0.069	1.35	12.5336
1	WT	IAA10nM	900	23	37	channel1:WT_NAA10nM_T0037_00009_CH4	2.359	0.823	2.344	83.408	0.417	0.039	1.4625	7.0842
1	WT	IAA10nM	925	23	38	channel1:WT_NAA10nM_T0038_00009_CH4	2.398	0.844	2.385	84.017	0.417	0.078	1.5125	14.1684
1	WT	IAA10nM	950	23	39	channel1:WT_NAA10nM_T0039_00009_CH4	2.363	0.792	2.344	82.656	0.417	0.043	1.0625	7.81079
1	WT	IAA10nM	975	23	40	channel1:WT_NAA10nM_T0040_00009_CH4	2.362	0.802	2.344	82.906	0.417	0.042	1.0125	7.62914
1	WT	IAA10nM	1000	23	41	channel1:WT_NAA10nM_T0041_00009_CH4	2.359	0.823	2.344	83.408	0.417	0.039	1.2375	7.0842
1	WT	IAA10nM	1025	23	42	channel1:WT_NAA10nM_T0042_00009_CH4	2.38	0.823	2.365	83.466	0.417	0.06	1.5125	10.8988
1	WT	IAA10nM	1050	23	43	channel1:WT_NAA10nM_T0043_00009_CH4	2.381	0.812	2.365	83.217	0.417	0.061	1.6375	11.0804
1	WT	IAA10nM	1075	23	44	channel1:WT_NAA10nM_T0044_00009_CH4	2.39	0.823	2.375	83.494	0.417	0.07	1.525	12.7152
1	WT	IAA10nM	1100	23	45	channel1:WT_NAA10nM_T0045_00009_CH4	2.372	0.802	2.354	82.937	0.417	0.052	1.225	9.4456
1	WT	IAA10nM	1125	23	46	channel1:WT_NAA10nM_T0046_00009_CH4	2.366	0.854	2.354	84.189	0.417	0.046	1.225	8.35572
1	WT	IAA10nM	1150	23	47	channel1:WT_NAA10nM_T0047_00009_CH4	2.372	0.802	2.354	82.937	0.417	0.052	1.3375	9.4456
1	WT	IAA10nM	1175	23	48	channel1:WT_NAA10nM_T0048_00009_CH4	2.375	0.781	2.354	82.439	0.417	0.055	1.225	9.99054
1	WT	IAA10nM	1200	23	49	channel1:WT_NAA10nM_T0049_00009_CH4	2.363	0.792	2.344	82.656	0.417	0.043	1.175	7.81079
1	WT	IAA10nM	1225	23	50	channel1:WT_NAA10nM_T0050_00009_CH4	2.371	0.812	2.354	83.187	0.417	0.051	53.7375	9.26395
2	WT	DMSO	0	1	1	channel1:WT_DMSO_T0001_00001_CH4	3.877	0.74	0	118.217	0.636	0	0.2375	0
2	WT	DMSO	25	1	2	channel1:WT_DMSO_T0002_00001_CH4	3.896	0.74	0	118.072	0.635	0.019	0.525	3.45128
2	WT	DMSO	50	1	3	channel1:WT_DMSO_T0003_00001_CH4	3.9	0.76	0	117.865	0.637	0.023	0.8125	4.17786
2	WT	DMSO	75	1	4	channel1:WT_DMSO_T0004_00001_CH4	3.919	0.76	0	117.723	0.636	0.042	1.2125	7.62914
2	WT	DMSO	100	1	5	channel1:WT_DMSO_T0005_00001_CH4	3.932	0.76	0	117.447	0.637	0.055	1.5625	9.99054
2	WT	DMSO	125	1	6	channel1:WT_DMSO_T0006_00001_CH4	3.947	0.76	0	117.85	0.636	0.07	1.975	12.7152
2	WT	DMSO	150	1	7	channel1:WT_DMSO_T0007_00001_CH4	3.965	0.76	0	117.709	0.637	0.088	2.375	15.9849
2	WT	DMSO	175	1	8	channel1:WT_DMSO_T0008_00001_CH4	3.979	0.76	0	117.437	0.637	0.102	2.725	18.5279
2	WT	DMSO	200	1	9	channel1:WT_DMSO_T0009_00001_CH4	3.993	0.76	0	117.501	0.637	0.116	3.075	21.071
2	WT	DMSO	225	1	10	channel1:WT_DMSO_T0010_00001_CH4	4.007	0.76	0	117.564	0.637	0.13	3.1875	23.614
2	WT	DMSO	250	1	11	channel1:WT_DMSO_T0011_00001_CH4	4.002	0.771	0	117.099	0.635	0.125	3.2375	22.7058
2	WT	DMSO	275	1	12	channel1:WT_DMSO_T0012_00001_CH4	4.011	0.771	0	117.364	0.637	0.134	3.525	24.3406
2	WT	DMSO	300	1	13	channel1:WT_DMSO_T0013_00001_CH4	4.025	0.76	0	117.427	0.637	0.148	3.825	26.8836
2	WT	DMSO	325	1	14	channel1:WT_DMSO_T0014_00001_CH4	4.035	0.76	0	117.359	0.636	0.158	4.0625	28.7001
2	WT	DMSO	350	1	15	channel1:WT_DMSO_T0015_00001_CH4	4.044	0.771	0	116.961	0.637	0.167	4.225	30.3349
2	WT	DMSO	375	1	16	channel1:WT_DMSO_T0016_00001_CH4	4.048	0.771	0	117.093	0.637	0.171	4.625	31.0615
2	WT	DMSO	400	1	17	channel1:WT_DMSO_T0017_00001_CH4	4.076	0.771	0	117.22	0.638	0.199	4.8	36.1476
2	WT	DMSO	425	1	18	channel1:WT_DMSO_T0018_00001_CH4	4.062	0.771	0	117.156	0.638	0.185	4.925	33.6045
2	WT	DMSO	450	1	19	channel1:WT_DMSO_T0019_00001_CH4	4.086	0.781	0	116.826	0.638	0.209	5.05	37.964
2	WT	DMSO	475	1	20	channel1:WT_DMSO_T0020_00001_CH4	4.072	0.792	0	117.089	0.636	0.195	5.05	35.421
2	WT	DMSO	500	1	21	channel1:WT_DMSO_T0021_00001_CH4	4.086	0.771	0	117.153	0.637	0.209	5.4	37.964
2	WT	DMSO	525	1	22	channel1:WT_DMSO_T0022_00001_CH4	4.1	0.771	0	116.891	0.636	0.223	5.575	40.5071
2	WT	DMSO	550	1	23	channel1:WT_DMSO_T0023_00001_CH4	4.1	0.781	0	117.216	0.636	0.223	5.625	40.5071
2	WT	DMSO	575	1	24	channel1:WT_DMSO_T0024_00001_CH4	4.104	0.781	0	117.345	0.636	0.227	5.8	41.2337
2	WT	DMSO	600	1	25	channel1:WT_DMSO_T0025_00001_CH4	4.114	0.781	0	117.279	0.638	0.237	5.975	43.0501
2	WT	DMSO	625	1	26	channel1:WT_DMSO_T0026_00001_CH4	4.118	0.781	0	117.084	0.638	0.241	6.2	43.7767
2	WT	DMSO	650	1	27	channel1:WT_DMSO_T0027_00001_CH4	4.132	0.781	0	117.146	0.637	0.255	6.375	46.3198
2	WT	DMSO	675	1	28	channel1:WT_DMSO_T0028_00001_CH4	4.132	0.792	0	117.146	0.637	0.255	6.5	46.3198
2	WT	DMSO	700	1	29	channel1:WT_DMSO_T0029_00001_CH4	4.142	0.792	0	116.114	0.637	0.265	6.8	48.1362
2	WT	DMSO	725	1	30	channel1:WT_DMSO_T0030_00001_CH4	4.156	0.781	0	117.143	0.636	0.279	7.025	50.6793
2	WT	DMSO	750	1	31	channel1:WT_DMSO_T0031_00001_CH4	4.16	0.781	0	116.629	0.636	0.283	7.1875	51.4059
2	WT	DMSO	775	1	32	channel1:WT_DMSO_T0032_00001_CH4	4.169	0.781	0	116.245	0.637	0.292	7.25	53.0407
2	WT	DMSO	800	1	33	channel1:WT_DMSO_T0033_00001_CH4	4.165	0.802	0	116.757	0.635	0.288	7.4875	52.3141
2	WT	DMSO	825	1	34	channel1:WT_DMSO_T0034_00001_CH4	4.188	0.792	0	116.756	0.635	0.311	7.8375	56.492
2	WT	DMSO	850	1	35	channel1:WT_DMSO_T0035_00001_CH4	4.193	0.792	0	116.883	0.636	0.316	8.1875	57.4002
2	WT	DMSO	875	1	36	channel1:WT_DMSO_T0036_00001_CH4	4.216	0.792	0	116.249	0.637	0.339	8.4125	61.5781
2	WT	DMSO	900	1	37	channel1:WT_DMSO_T0037_00001_CH4	4.211	0.792	0	116.438	0.636	0.334	8.35	60.6698
2	WT	DMSO	925	1	38	channel1:WT_DMSO_T0038_00001_CH4	4.211	0.792	0	116.438	0.636	0.334	8.35	60.6698
2	WT	DMSO	950	1	39	channel1:WT_DMSO_T0039_00001_CH4	4.211	0.792	0	116.755	0.636	0.334	8.5875	60.6698
2	WT	DMSO	975	1	40	channel1:WT_DMSO_T0040_00001_CH4	4.23	0.792	0	116.628	0.636	0.353	8.825	64.1211
2	WT	DMSO	1000	1	41	channel1:WT_DMSO_T0041_00001_CH4	4.23	0.792	0	116.628	0.636	0.353	8.7625	64.1211
2	WT	DMSO	1025	1	42	channel1:WT_DMSO_T0042_00001_CH4	4.225	0.802	0	116.502	0.637	0.348	8.9375	63.2129
2	WT	DMSO	1050	1	43	channel1:WT_DMSO_T0043_00001_CH4	4.244	0.802	0	116.062	0.638	0.367	9.175	66.6641
2	WT	DMSO	1075	1	44	channel1:WT_DMSO_T0044_00001_CH4	4.244	0.802	0	116.062	0.637	0.367	9.4125	66.6641
2	WT	DMSO	1100	1	45	channel1:WT_DMSO_T0045_00001_CH4	4.263	0.792	0	116.252	0.637	0.386	9.7625	70.1154
2	WT	DMSO	1125	1	46	channel1:WT_DMSO_T0046_00001_CH4	4.272	0.792	0	116.19	0.637	0.395	9.875	71.7502
2	WT	DMSO	1150	1	47	channel1:WT_DMSO_T0047_00001_CH4	4.272	0.802	0	116.19	0.637	0.395	9.9875	71.7502
2	WT	DMSO	1175	1	48	channel1:WT_DMSO_T0048_00001_CH4	4.281	0.802	0	116.129	0.637	0.404	10.1	73.3851
2	WT	DMSO	1200	1	49	channel1:WT_DMSO_T0049_00001_CH4	4.281	0.802	0	116.129	0.637	0.404	10.225	73.3851
2	WT	DMSO	1225	1	50	channel1:WT_DMSO_T0050_00001_CH4	4.291	0.802	0	116.067	0.637	0.414	289	75.2015
2	WT	DMSO	0	4	1	channel1:WT_DMSO_T0001_00010_CH4	3.103	1.01	3.042	78.577	0.683	0	0.2375	0
2	WT	DMSO	25	4	2	channel1:WT_DMSO_T0002_00010_CH4	3.122	1.021	3.062	78.84	0.682	0.019	0.675	3.45128
2	WT	DMSO	50	4	3	channel1:WT_DMSO_T0003_00010_CH4	3.138	1.031	3.083	79.287	0.684	0.035	1.15	6.35762
2	WT	DMSO	75	4	4	channel1:WT_DMSO_T0004_00010_CH4	3.16	1.031	3.104	79.172	0.683	0.057	1.6875	10.3538
2	WT	DMSO	100	4	5	channel1:WT_DMSO_T0005_00010_CH4	3.181	1.021	3.125	79.242	0.685	0.078	2.175	14.1684
2	WT	DMSO	125	4	6	channel1:WT_DMSO_T0006_00010_CH4	3.199	1.021	3.146	79.495	0.685	0.096	2.7625	17.438
2	WT	DMSO	150	4	7	channel1:WT_DMSO_T0007_00010_CH4	3.228	1.042	3.177	79.778	0.686	0.125	3.3625	22.7058
2	WT	DMSO	175	4	8	channel1:WT_DMSO_T0008_00010_CH4	3.247	1.052	3.198	80.024	0.686	0.144	3.8375	26.157
2	WT	DMSO	200	4	9	channel1:WT_DMSO_T0009_00010_CH4	3.266	1.052	3.219	80.267	0.686	0.163	4.225	29.6083
2	WT	DMSO	225	4	10	channel1:WT_DMSO_T0010_00010_CH4	3.278	1.031	3.229	80.119	0.685	0.175	4.675	31.7881
2	WT	DMSO	250	4	11	channel1:WT_DMSO_T0011_00010_CH4	3.302	1.052	3.26	80.924	0.685	0.199	5.1375	36.1476
2	WT	DMSO	275	4	12	channel1:WT_DMSO_T0012_00010_CH4	3.315	1.052	3.271	80.597	0.68	0.212	5.475	38.509
2	WT	DMSO	300	4	13	channel1:WT_DMSO_T0013_00010_CH4	3.329	1.062	3.292	81.363	0.68	0.226	5.7875	41.052
2	WT	DMSO	325	4	14	channel1:WT_DMSO_T0014_00010_CH4	3.34	1.062	3.302	81.39	0.681	0.237	6.175	43.0501
2	WT	DMSO	350	4	15	channel1:WT_DMSO_T0015_00010_CH4	3.36	1.062	3.323	81.443	0.682	0.257	6.5375	46.6831
2	WT	DMSO	375	4	16	channel1:WT_DMSO_T0016_00010_CH4	3.369	1.073	3.333	81.644	0.683	0.266	6.8	48.3179
2	WT	DMSO	400	4	17	channel1:WT_DMSO_T0017_00010_CH4	3.381	1.062	3.344	81.495	0.684	0.278	7.075	50.4976
2	WT	DMSO	425	4	18	channel1:WT_DMSO_T0018_00010_CH4	3.391	1.062	3.354	81.521	0.685	0.288	7.35	52.3141
2	WT	DMSO	450	4	19	channel1:WT_DMSO_T0019_00010_CH4	3.403	1.042	3.354	80.307	0.684	0.3	7.5875	54.4939
2	WT	DMSO	475	4	20	channel1:WT_DMSO_T0020_00010_CH4	3.41	1.073	3.375	81.746	0.684	0.307	7.7875	55.7654
2	WT	DMSO	500	4	21	channel1:WT_DMSO_T0021_00010_CH4	3.419	1.083	3.385	81.944	0.686	0.316	8.1125	57.4002
2	WT	DMSO	525	4	22	channel1:WT_DMSO_T0022_00010_CH4	3.436	1.083	3.396	81.28	0.685	0.333	8.375	60.4882
2	WT	DMSO	550	4	23	channel1:WT_DMSO_T0023_00010_CH4	3.44	1.052	3.396	80.766	0.687	0.337	8.475	61.2148
2	WT	DMSO	575	4	24	channel1:WT_DMSO_T0024_00010_CH4	3.444	1.052	3.406	81.478	0.685	0.341	8.6375	61.9413
2	WT	DMSO	600	4	25	channel1:WT_DMSO_T0025_00010_CH4	3.453	1.062	3.417	81.674	0.685	0.35	8.9	63.5762
2	WT	DMSO	625	4	26	channel1:WT_DMSO_T0026_00010_CH4	3.465	1.073	3.427	81.529	0.685	0.362	9.175	65.7559
2	WT	DMSO	650	4	27	channel1:WT_DMSO_T0027_00010_CH4	3.475	1.073	3.438	81.554	0.685	0.372	9.3375	67.5724
2	WT	DMSO	675	4	28	channel1:WT_DMSO_T0028_00010_CH4	3.478	1.052	3.438	81.215	0.689	0.375	9.5125	68.1173
2	WT	DMSO	700	4	29	channel1:WT_DMSO_T0029_00010_CH4	3.489	1.052	3.448	81.241	0.686	0.386	9.75	70.1154
2	WT	DMSO	725	4	30	channel1:WT_DMSO_T0030_00010_CH4	3.497	1.062	3.458	81.435	0.685	0.394	9.95	71.5686
2	WT	DMSO	750	4	31	channel1:WT_DMSO_T0031_00010_CH4	3.505	1.083	3.469	81.798	0.685	0.402	10.1375	73.0218
2	WT	DMSO	775	4	32	channel1:WT_DMSO_T0032_00010_CH4	3.512	1.052	3.469	80.957	0.684	0.409	10.3125	74.2933
2	WT	DMSO	800	4	33	channel1:WT_DMSO_T0033_00010_CH4	3.519	1.062	3.479	81.318	0.684	0.416	10.5375	75.5648
2	WT	DMSO	825	4	34	channel1:WT_DMSO_T0034_00010_CH4	3.53	1.062	3.49	81.344	0.683	0.427	10.7625	77.5629
2	WT	DMSO	850	4	35	channel1:WT_DMSO_T0035_00010_CH4	3.537	1.083	3.5	81.703	0.683	0.434	10.8875	78.8344
2	WT	DMSO	875	4	36	channel1:WT_DMSO_T0036_00010_CH4	3.54	1.052	3.5	81.369	0.685	0.437	11.0375	79.3794
2	WT	DMSO	900	4	37	channel1:WT_DMSO_T0037_00010_CH4	3.549	1.062	3.51	81.561	0.683	0.446	11.2625	81.0142
2	WT	DMSO	925	4	38	channel1:WT_DMSO_T0038_00010_CH4	3.558	1.073	3.521	81.751	0.682	0.455	11.475	82.649
2	WT	DMSO	950	4	39	channel1:WT_DMSO_T0039_00010_CH4	3.566	1.083	3.531	81.941	0.683	0.463	11.675	84.1022
2	WT	DMSO	975	4	40	channel1:WT_DMSO_T0040_00010_CH4	3.574	1.094	3.542	82.295	0.682	0.471	11.8625	85.5553
2	WT	DMSO	1000	4	41	channel1:WT_DMSO_T0041_00010_CH4	3.581	1.062	3.542	81.469	0.683	0.478	12.05	86.8269
2	WT	DMSO	1025	4	42	channel1:WT_DMSO_T0042_00010_CH4	3.589	1.073	3.552	81.823	0.683	0.486	12.275	88.28
2	WT	DMSO	1050	4	43	channel1:WT_DMSO_T0043_00010_CH4	3.599	1.073	3.562	81.846	0.683	0.496	12.4375	90.0965
2	WT	DMSO	1075	4	44	channel1:WT_DMSO_T0044_00010_CH4	3.602	1.094	3.573	82.69	0.684	0.499	12.525	90.6414
2	WT	DMSO	1100	4	45	channel1:WT_DMSO_T0045_00010_CH4	3.606	1.062	3.573	82.198	0.683	0.503	12.675	91.368
2	WT	DMSO	1125	4	46	channel1:WT_DMSO_T0046_00010_CH4	3.614	1.073	3.583	82.547	0.679	0.511	12.975	92.8212
2	WT	DMSO	1150	4	47	channel1:WT_DMSO_T0047_00010_CH4	3.63	1.073	3.594	81.916	0.682	0.527	13.2875	95.7275
2	WT	DMSO	1175	4	48	channel1:WT_DMSO_T0048_00010_CH4	3.639	1.083	3.604	82.102	0.682	0.536	13.5375	97.3623
2	WT	DMSO	1200	4	49	channel1:WT_DMSO_T0049_00010_CH4	3.65	1.083	3.615	81.962	0.681	0.547	13.675	99.3605
2	WT	DMSO	1225	4	50	channel1:WT_DMSO_T0050_00010_CH4	3.65	1.073	3.615	81.962	0.68	0.547	406.112	99.3605
2	WT	DMSO	0	5	1	channel1-1:WT_DMSO_T0001_00010_CH4	2.928	1.125	0	106.113	0.69	0	0.1	0
2	WT	DMSO	25	5	2	channel1-1:WT_DMSO_T0002_00010_CH4	2.936	1.125	0	106.699	0.704	0.008	0.25	1.45317
2	WT	DMSO	50	5	3	channel1-1:WT_DMSO_T0003_00010_CH4	2.94	1.125	0	106.252	0.695	0.012	0.4125	2.17975
2	WT	DMSO	75	5	4	channel1-1:WT_DMSO_T0004_00010_CH4	2.949	1.125	0	106.835	0.677	0.021	0.6125	3.81457
2	WT	DMSO	100	5	5	channel1-1:WT_DMSO_T0005_00010_CH4	2.956	1.125	0	106.583	0.682	0.028	0.825	5.08609
2	WT	DMSO	125	5	6	channel1-1:WT_DMSO_T0006_00010_CH4	2.966	1.125	0	106.526	0.68	0.038	1.025	6.90255
2	WT	DMSO	150	5	7	channel1-1:WT_DMSO_T0007_00010_CH4	2.972	1.125	0	106.911	0.7	0.044	1.1875	7.99243
2	WT	DMSO	175	5	8	channel1-1:WT_DMSO_T0008_00010_CH4	2.979	1.125	0	106.661	0.7	0.051	1.4375	9.26395
2	WT	DMSO	200	5	9	channel1-1:WT_DMSO_T0009_00010_CH4	2.992	1.115	0	106.795	0.692	0.064	1.6375	11.6254
2	WT	DMSO	225	5	10	channel1-1:WT_DMSO_T0010_00010_CH4	2.995	1.115	0	106.986	0.692	0.067	1.7625	12.1703
2	WT	DMSO	250	5	11	channel1-1:WT_DMSO_T0011_00010_CH4	3.002	1.115	0	106.737	0.695	0.074	1.925	13.4418
2	WT	DMSO	275	5	12	channel1-1:WT_DMSO_T0012_00010_CH4	3.008	1.115	0	107.117	0.695	0.08	2.0875	14.5317
2	WT	DMSO	300	5	13	channel1-1:WT_DMSO_T0013_00010_CH4	3.015	1.115	0	106.87	0.695	0.087	2.25	15.8032
2	WT	DMSO	325	5	14	channel1-1:WT_DMSO_T0014_00010_CH4	3.021	1.115	0	107.248	0.682	0.093	2.4125	16.8931
2	WT	DMSO	350	5	15	channel1-1:WT_DMSO_T0015_00010_CH4	3.028	1.115	0	107.001	0.685	0.1	2.5375	18.1646
2	WT	DMSO	375	5	16	channel1-1:WT_DMSO_T0016_00010_CH4	3.031	1.115	0	107.19	0.682	0.103	2.6625	18.7096
2	WT	DMSO	400	5	17	channel1-1:WT_DMSO_T0017_00010_CH4	3.038	1.115	0	106.944	0.685	0.11	2.825	19.9811
2	WT	DMSO	425	5	18	channel1-1:WT_DMSO_T0018_00010_CH4	3.044	1.115	0	107.319	0.687	0.116	2.9875	21.071
2	WT	DMSO	450	5	19	channel1-1:WT_DMSO_T0019_00010_CH4	3.051	1.115	0	107.074	0.695	0.123	3.1125	22.3425
2	WT	DMSO	475	5	20	channel1-1:WT_DMSO_T0020_00010_CH4	3.054	1.115	0	107.261	0.687	0.126	3.2375	22.8874
2	WT	DMSO	500	5	21	channel1-1:WT_DMSO_T0021_00010_CH4	3.061	1.115	0	107.017	0.687	0.133	3.3625	24.1589
2	WT	DMSO	525	5	22	channel1-1:WT_DMSO_T0022_00010_CH4	3.064	1.115	0	107.203	0.69	0.136	3.4375	24.7039
2	WT	DMSO	550	5	23	channel1-1:WT_DMSO_T0023_00010_CH4	3.067	1.115	0	107.389	0.685	0.139	3.525	25.2488
2	WT	DMSO	575	5	24	channel1-1:WT_DMSO_T0024_00010_CH4	3.071	1.115	0	106.96	0.69	0.143	3.6875	25.9754
2	WT	DMSO	600	5	25	channel1-1:WT_DMSO_T0025_00010_CH4	3.08	1.115	0	107.516	0.688	0.152	3.8875	27.6102
2	WT	DMSO	625	5	26	channel1-1:WT_DMSO_T0026_00010_CH4	3.087	1.115	0	107.273	0.689	0.159	4.0125	28.8817
2	WT	DMSO	650	5	27	channel1-1:WT_DMSO_T0027_00010_CH4	3.09	1.115	0	107.458	0.682	0.162	4.175	29.4267
2	WT	DMSO	675	5	28	channel1-1:WT_DMSO_T0028_00010_CH4	3.1	1.115	0	107.4	0.704	0.172	4.3375	31.2431
2	WT	DMSO	700	5	29	channel1-1:WT_DMSO_T0029_00010_CH4	3.103	1.115	0	107.583	0.681	0.175	4.4625	31.7881
2	WT	DMSO	725	5	30	channel1-1:WT_DMSO_T0030_00010_CH4	3.11	1.115	0	107.343	0.689	0.182	4.5875	33.0596
2	WT	DMSO	750	5	31	channel1-1:WT_DMSO_T0031_00010_CH4	3.113	1.115	0	107.526	0.688	0.185	4.6625	33.6045
2	WT	DMSO	775	5	32	channel1-1:WT_DMSO_T0032_00010_CH4	3.116	1.115	0	107.708	0.688	0.188	4.75	34.1495
2	WT	DMSO	800	5	33	channel1-1:WT_DMSO_T0033_00010_CH4	3.12	1.115	0	107.286	0.688	0.192	4.875	34.8761
2	WT	DMSO	825	5	34	channel1-1:WT_DMSO_T0034_00010_CH4	3.126	1.115	0	107.65	0.688	0.198	4.95	35.9659
2	WT	DMSO	850	5	35	channel1-1:WT_DMSO_T0035_00010_CH4	3.126	1.115	0	107.65	0.687	0.198	5.075	35.9659
2	WT	DMSO	875	5	36	channel1-1:WT_DMSO_T0036_00010_CH4	3.136	1.115	0	107.592	0.688	0.208	5.2875	37.7824
2	WT	DMSO	900	5	37	channel1-1:WT_DMSO_T0037_00010_CH4	3.143	1.115	0	107.354	0.701	0.215	5.45	39.0539
2	WT	DMSO	925	5	38	channel1-1:WT_DMSO_T0038_00010_CH4	3.149	1.115	0	107.716	0.701	0.221	5.575	40.1438
2	WT	DMSO	950	5	39	channel1-1:WT_DMSO_T0039_00010_CH4	3.153	1.115	0	107.298	0.701	0.225	5.7375	40.8704
2	WT	DMSO	975	5	40	channel1-1:WT_DMSO_T0040_00010_CH4	3.162	1.115	0	107.838	0.696	0.234	5.8125	42.5052
2	WT	DMSO	1000	5	41	channel1-1:WT_DMSO_T0041_00010_CH4	3.159	1.115	0	107.658	0.69	0.231	5.9375	41.9603
2	WT	DMSO	1025	5	42	channel1-1:WT_DMSO_T0042_00010_CH4	3.172	1.104	0	107.781	0.687	0.244	6.225	44.3217
2	WT	DMSO	1050	5	43	channel1-1:WT_DMSO_T0043_00010_CH4	3.182	1.104	0	108.316	0.69	0.254	6.3125	46.1381
2	WT	DMSO	1075	5	44	channel1-1:WT_DMSO_T0044_00010_CH4	3.179	1.115	0	107.544	0.69	0.251	6.3125	45.5932
2	WT	DMSO	1100	5	45	channel1-1:WT_DMSO_T0045_00010_CH4	3.182	1.104	0	107.723	0.689	0.254	6.4375	46.1381
2	WT	DMSO	1125	5	46	channel1-1:WT_DMSO_T0046_00010_CH4	3.189	1.104	0	108.08	0.689	0.261	6.65	47.4096
2	WT	DMSO	1150	5	47	channel1-1:WT_DMSO_T0047_00010_CH4	3.199	1.104	0	108.022	0.688	0.271	6.8125	49.2261
2	WT	DMSO	1175	5	48	channel1-1:WT_DMSO_T0048_00010_CH4	3.202	1.104	0	107.61	0.688	0.274	6.85	49.7711
2	WT	DMSO	1200	5	49	channel1-1:WT_DMSO_T0049_00010_CH4	3.202	1.104	0	107.61	0.688	0.274	6.9375	49.7711
2	WT	DMSO	1225	5	50	channel1-1:WT_DMSO_T0050_00010_CH4	3.209	1.104	0	107.964	0.688	0.281	185.413	51.0426
2	WT	DMSO	0	6	51	channel1:WT_DMSO_T0001_00011_CH4	3.271	1.5	3.115	72.2	0.647	0	0	0
2	WT	DMSO	25	6	52	channel1:WT_DMSO_T0002_00011_CH4	3.271	1.5	3.115	72.2	0.648	0	0.2875	0
2	WT	DMSO	50	6	53	channel1:WT_DMSO_T0003_00011_CH4	3.294	1.5	3.135	72.138	0.648	0.023	0.7375	4.17786
2	WT	DMSO	75	6	54	channel1:WT_DMSO_T0004_00011_CH4	3.307	1.5	3.146	72.022	0.648	0.036	0.9875	6.53926
2	WT	DMSO	100	6	55	channel1:WT_DMSO_T0005_00011_CH4	3.314	1.49	3.156	72.248	0.65	0.043	1.525	7.81079
2	WT	DMSO	125	6	56	channel1:WT_DMSO_T0006_00011_CH4	3.35	1.51	3.188	72.072	0.65	0.079	2.0125	14.35
2	WT	DMSO	150	6	57	channel1:WT_DMSO_T0007_00011_CH4	3.353	1.49	3.188	71.903	0.65	0.082	2.2625	14.895
2	WT	DMSO	175	6	58	channel1:WT_DMSO_T0008_00011_CH4	3.37	1.49	3.198	71.621	0.645	0.099	2.55	17.983
2	WT	DMSO	200	6	59	channel1:WT_DMSO_T0009_00011_CH4	3.376	1.479	3.208	71.845	0.648	0.105	2.925	19.0728
2	WT	DMSO	225	6	60	channel1:WT_DMSO_T0010_00011_CH4	3.4	1.521	3.24	72.342	0.646	0.129	3.3	23.4324
2	WT	DMSO	250	6	61	channel1:WT_DMSO_T0011_00011_CH4	3.406	1.469	3.229	71.454	0.648	0.135	3.5375	24.5222
2	WT	DMSO	275	6	62	channel1:WT_DMSO_T0012_00011_CH4	3.419	1.469	3.24	71.344	0.642	0.148	3.7875	26.8836
2	WT	DMSO	300	6	63	channel1:WT_DMSO_T0013_00011_CH4	3.426	1.479	3.25	71.565	0.648	0.155	3.8375	28.1552
2	WT	DMSO	325	6	64	channel1:WT_DMSO_T0014_00011_CH4	3.423	1.458	3.25	71.73	0.648	0.152	3.8375	27.6102
2	WT	DMSO	350	6	65	channel1:WT_DMSO_T0015_00011_CH4	3.426	1.448	3.25	71.565	0.649	0.155	4.1625	28.1552
2	WT	DMSO	375	6	66	channel1:WT_DMSO_T0016_00011_CH4	3.449	1.458	3.271	71.51	0.648	0.178	4.5375	32.333
2	WT	DMSO	400	6	67	channel1:WT_DMSO_T0017_00011_CH4	3.456	1.458	3.271	71.183	0.648	0.185	4.575	33.6045
2	WT	DMSO	425	6	68	channel1:WT_DMSO_T0018_00011_CH4	3.452	1.458	3.281	71.893	0.648	0.181	4.775	32.878
2	WT	DMSO	450	6	69	channel1:WT_DMSO_T0019_00011_CH4	3.472	1.438	3.281	70.913	0.65	0.201	5.1875	36.5109
2	WT	DMSO	475	6	70	channel1:WT_DMSO_T0020_00011_CH4	3.485	1.458	3.302	71.348	0.645	0.214	5.35	38.8723
2	WT	DMSO	500	6	71	channel1:WT_DMSO_T0021_00011_CH4	3.485	1.458	3.302	71.348	0.644	0.214	5.225	38.8723
2	WT	DMSO	525	6	72	channel1:WT_DMSO_T0022_00011_CH4	3.475	1.448	3.302	71.837	0.641	0.204	5.3875	37.0558
2	WT	DMSO	550	6	73	channel1:WT_DMSO_T0023_00011_CH4	3.498	1.448	3.312	71.241	0.648	0.227	5.6375	41.2337
2	WT	DMSO	575	6	74	channel1:WT_DMSO_T0024_00011_CH4	3.495	1.458	3.323	71.943	0.648	0.224	5.6875	40.6887
2	WT	DMSO	600	6	75	channel1:WT_DMSO_T0025_00011_CH4	3.502	1.448	3.323	71.619	0.648	0.231	5.775	41.9603
2	WT	DMSO	625	6	76	channel1:WT_DMSO_T0026_00011_CH4	3.502	1.458	3.333	72.158	0.643	0.231	5.9375	41.9603
2	WT	DMSO	650	6	77	channel1:WT_DMSO_T0027_00011_CH4	3.515	1.458	3.344	72.048	0.648	0.244	6.0125	44.3217
2	WT	DMSO	675	6	78	channel1:WT_DMSO_T0028_00011_CH4	3.508	1.458	3.344	72.372	0.645	0.237	5.925	43.0501
2	WT	DMSO	700	6	79	channel1:WT_DMSO_T0029_00011_CH4	3.508	1.458	3.344	72.372	0.642	0.237	6.1375	43.0501
2	WT	DMSO	725	6	80	channel1:WT_DMSO_T0030_00011_CH4	3.525	1.448	3.354	72.101	0.648	0.254	6.55	46.1381
2	WT	DMSO	750	6	81	channel1:WT_DMSO_T0031_00011_CH4	3.541	1.448	3.354	71.299	0.649	0.27	6.5875	49.0445
2	WT	DMSO	775	6	82	channel1:WT_DMSO_T0032_00011_CH4	3.528	1.438	3.354	71.94	0.645	0.257	6.5125	46.6831
2	WT	DMSO	800	6	83	channel1:WT_DMSO_T0033_00011_CH4	3.535	1.448	3.365	72.152	0.645	0.264	6.675	47.9546
2	WT	DMSO	825	6	84	channel1:WT_DMSO_T0034_00011_CH4	3.541	1.438	3.365	71.832	0.645	0.27	6.7875	49.0445
2	WT	DMSO	850	6	85	channel1:WT_DMSO_T0035_00011_CH4	3.544	1.427	3.365	71.672	0.648	0.273	6.875	49.5894
2	WT	DMSO	875	6	86	channel1:WT_DMSO_T0036_00011_CH4	3.548	1.479	3.385	72.576	0.649	0.277	7.0875	50.316
2	WT	DMSO	900	6	87	channel1:WT_DMSO_T0037_00011_CH4	3.561	1.427	3.375	71.406	0.646	0.29	7.2875	52.6774
2	WT	DMSO	925	6	88	channel1:WT_DMSO_T0038_00011_CH4	3.564	1.479	3.396	72.306	0.648	0.293	7.4875	53.2223
2	WT	DMSO	950	6	89	channel1:WT_DMSO_T0039_00011_CH4	3.577	1.417	3.385	71.143	0.647	0.306	7.7375	55.5837
2	WT	DMSO	975	6	90	channel1:WT_DMSO_T0040_00011_CH4	3.584	1.427	3.396	71.354	0.649	0.313	7.95	56.8553
2	WT	DMSO	1000	6	91	channel1:WT_DMSO_T0041_00011_CH4	3.594	1.427	3.406	71.408	0.647	0.323	8.1625	58.6717
2	WT	DMSO	1025	6	92	channel1:WT_DMSO_T0042_00011_CH4	3.601	1.417	3.406	71.093	0.647	0.33	8.125	59.9432
2	WT	DMSO	1050	6	93	channel1:WT_DMSO_T0043_00011_CH4	3.591	1.427	3.417	72.091	0.645	0.32	8.0375	58.1268
2	WT	DMSO	1075	6	94	channel1:WT_DMSO_T0044_00011_CH4	3.594	1.417	3.417	71.933	0.647	0.323	8.15	58.6717
2	WT	DMSO	1100	6	95	channel1:WT_DMSO_T0045_00011_CH4	3.6	1.406	3.417	71.617	0.647	0.329	8.4	59.7616
2	WT	DMSO	1125	6	96	channel1:WT_DMSO_T0046_00011_CH4	3.614	1.417	3.427	71.513	0.646	0.343	8.575	62.3046
2	WT	DMSO	1150	6	97	channel1:WT_DMSO_T0047_00011_CH4	3.614	1.406	3.427	71.513	0.646	0.343	8.7375	62.3046
2	WT	DMSO	1175	6	98	channel1:WT_DMSO_T0048_00011_CH4	3.627	1.406	3.438	71.409	0.647	0.356	8.85	64.666
2	WT	DMSO	1200	6	99	channel1:WT_DMSO_T0049_00011_CH4	3.623	1.406	3.438	71.565	0.646	0.352	8.975	63.9395
2	WT	DMSO	1225	6	100	channel1:WT_DMSO_T0050_00011_CH4	3.637	1.385	3.438	70.942	0.645	0.366	265.45	66.4825
2	WT	DMSO	0	7	1	channel1:WT_DMSO_T0001_00012_CH4	3.548	1.469	3.5	80.538	0.695	0	0.1125	0
2	WT	DMSO	25	7	2	channel1:WT_DMSO_T0002_00012_CH4	3.557	1.479	3.5	79.71	0.697	0.009	0.35	1.63482
2	WT	DMSO	50	7	3	channel1:WT_DMSO_T0003_00012_CH4	3.567	1.479	3.51	79.74	0.695	0.019	0.65	3.45128
2	WT	DMSO	75	7	4	channel1:WT_DMSO_T0004_00012_CH4	3.581	1.469	3.521	79.442	0.696	0.033	1.0625	5.99432
2	WT	DMSO	100	7	5	channel1:WT_DMSO_T0005_00012_CH4	3.6	1.479	3.542	79.665	0.695	0.052	1.4875	9.4456
2	WT	DMSO	125	7	6	channel1:WT_DMSO_T0006_00012_CH4	3.615	1.49	3.562	80.212	0.694	0.067	1.95	12.1703
2	WT	DMSO	150	7	7	channel1:WT_DMSO_T0007_00012_CH4	3.637	1.49	3.583	80.106	0.696	0.089	2.375	16.1665
2	WT	DMSO	175	7	8	channel1:WT_DMSO_T0008_00012_CH4	3.649	1.479	3.594	79.973	0.696	0.101	2.6875	18.3463
2	WT	DMSO	200	7	9	channel1:WT_DMSO_T0009_00012_CH4	3.662	1.479	3.604	79.841	0.69	0.114	2.95	20.7077
2	WT	DMSO	225	7	10	channel1:WT_DMSO_T0010_00012_CH4	3.67	1.479	3.615	80.03	0.689	0.122	3.3125	22.1608
2	WT	DMSO	250	7	11	channel1:WT_DMSO_T0011_00012_CH4	3.691	1.49	3.635	80.086	0.691	0.143	3.8	25.9754
2	WT	DMSO	275	7	12	channel1:WT_DMSO_T0012_00012_CH4	3.709	1.5	3.656	80.3	0.691	0.161	4.025	29.245
2	WT	DMSO	300	7	13	channel1:WT_DMSO_T0013_00012_CH4	3.709	1.49	3.656	80.3	0.692	0.161	4.1375	29.245
2	WT	DMSO	325	7	14	channel1:WT_DMSO_T0014_00012_CH4	3.718	1.5	3.667	80.485	0.69	0.17	4.5	30.8798
2	WT	DMSO	350	7	15	channel1:WT_DMSO_T0015_00012_CH4	3.738	1.5	3.688	80.538	0.69	0.19	4.75	34.5128
2	WT	DMSO	375	7	16	channel1:WT_DMSO_T0016_00012_CH4	3.738	1.5	3.688	80.538	0.69	0.19	4.8875	34.5128
2	WT	DMSO	400	7	17	channel1:WT_DMSO_T0017_00012_CH4	3.749	1.5	3.698	80.564	0.688	0.201	5.2625	36.5109
2	WT	DMSO	425	7	18	channel1:WT_DMSO_T0018_00012_CH4	3.768	1.5	3.719	80.772	0.687	0.22	5.6	39.9622
2	WT	DMSO	450	7	19	channel1:WT_DMSO_T0019_00012_CH4	3.776	1.51	3.729	80.953	0.687	0.228	5.85	41.4153
2	WT	DMSO	475	7	20	channel1:WT_DMSO_T0020_00012_CH4	3.788	1.51	3.74	80.823	0.688	0.24	6	43.5951
2	WT	DMSO	500	7	21	channel1:WT_DMSO_T0021_00012_CH4	3.788	1.51	3.74	80.823	0.687	0.24	6.1125	43.5951
2	WT	DMSO	525	7	22	channel1:WT_DMSO_T0022_00012_CH4	3.797	1.51	3.75	81.003	0.685	0.249	6.325	45.2299
2	WT	DMSO	550	7	23	channel1:WT_DMSO_T0023_00012_CH4	3.805	1.51	3.76	81.182	0.685	0.257	6.8125	46.6831
2	WT	DMSO	575	7	24	channel1:WT_DMSO_T0024_00012_CH4	3.836	1.51	3.792	81.254	0.686	0.288	7.3375	52.3141
2	WT	DMSO	600	7	25	channel1:WT_DMSO_T0025_00012_CH4	3.847	1.51	3.802	81.277	0.683	0.299	7.1875	54.3122
2	WT	DMSO	625	7	26	channel1:WT_DMSO_T0026_00012_CH4	3.824	1.521	3.781	81.384	0.686	0.276	6.925	50.1343
2	WT	DMSO	650	7	27	channel1:WT_DMSO_T0027_00012_CH4	3.826	1.51	3.781	81.23	0.686	0.278	7.15	50.4976
2	WT	DMSO	675	7	28	channel1:WT_DMSO_T0028_00012_CH4	3.842	1.521	3.802	81.738	0.685	0.294	7.3	53.404
2	WT	DMSO	700	7	29	channel1:WT_DMSO_T0029_00012_CH4	3.838	1.5	3.792	81.1	0.682	0.29	7.3125	52.6774
2	WT	DMSO	725	7	30	channel1:WT_DMSO_T0030_00012_CH4	3.843	1.51	3.802	81.584	0.682	0.295	7.3375	53.5856
2	WT	DMSO	750	7	31	channel1:WT_DMSO_T0031_00012_CH4	3.84	1.51	3.802	81.892	0.68	0.292	7.4375	53.0407
2	WT	DMSO	775	7	32	channel1:WT_DMSO_T0032_00012_CH4	3.851	1.5	3.802	80.818	0.685	0.303	7.7	55.0388
2	WT	DMSO	800	7	33	channel1:WT_DMSO_T0033_00012_CH4	3.861	1.521	3.823	81.935	0.691	0.313	7.95	56.8553
2	WT	DMSO	825	7	34	channel1:WT_DMSO_T0034_00012_CH4	3.871	1.521	3.833	81.957	0.69	0.323	8.075	58.6717
2	WT	DMSO	850	7	35	channel1:WT_DMSO_T0035_00012_CH4	3.871	1.521	3.833	81.957	0.686	0.323	8.175	58.6717
2	WT	DMSO	875	7	36	channel1:WT_DMSO_T0036_00012_CH4	3.879	1.51	3.833	81.195	0.681	0.331	8.325	60.1249
2	WT	DMSO	900	7	37	channel1:WT_DMSO_T0037_00012_CH4	3.883	1.51	3.844	81.826	0.682	0.335	8.6	60.8515
2	WT	DMSO	925	7	38	channel1:WT_DMSO_T0038_00012_CH4	3.901	1.51	3.854	81.091	0.679	0.353	8.7375	64.1211
2	WT	DMSO	950	7	39	channel1:WT_DMSO_T0039_00012_CH4	3.894	1.51	3.854	81.848	0.682	0.346	8.875	62.8496
2	WT	DMSO	975	7	40	channel1:WT_DMSO_T0040_00012_CH4	3.912	1.51	3.865	81.115	0.681	0.364	9.075	66.1192
2	WT	DMSO	1000	7	41	channel1:WT_DMSO_T0041_00012_CH4	3.91	1.51	3.865	81.265	0.678	0.362	9.175	65.7559
2	WT	DMSO	1025	7	42	channel1:WT_DMSO_T0042_00012_CH4	3.92	1.521	3.875	81.289	0.68	0.372	9.325	67.5724
2	WT	DMSO	1050	7	43	channel1:WT_DMSO_T0043_00012_CH4	3.922	1.51	3.875	81.138	0.682	0.374	9.4375	67.9357
2	WT	DMSO	1075	7	44	channel1:WT_DMSO_T0044_00012_CH4	3.929	1.521	3.885	81.462	0.68	0.381	9.65	69.2072
2	WT	DMSO	1100	7	45	channel1:WT_DMSO_T0045_00012_CH4	3.939	1.521	3.896	81.484	0.681	0.391	9.775	71.0237
2	WT	DMSO	1125	7	46	channel1:WT_DMSO_T0046_00012_CH4	3.939	1.521	3.896	81.484	0.69	0.391	9.925	71.0237
2	WT	DMSO	1150	7	47	channel1:WT_DMSO_T0047_00012_CH4	3.951	1.521	3.906	81.357	0.683	0.403	10.1875	73.2034
2	WT	DMSO	1175	7	48	channel1:WT_DMSO_T0048_00012_CH4	3.96	1.521	3.917	81.529	0.683	0.412	10.425	74.8382
2	WT	DMSO	1200	7	49	channel1:WT_DMSO_T0049_00012_CH4	3.97	1.521	3.927	81.551	0.682	0.422	10.575	76.6547
2	WT	DMSO	1225	7	50	channel1:WT_DMSO_T0050_00012_CH4	3.972	1.51	3.927	81.402	0.679	0.424	306.975	77.018
2	WT	DMSO	0	8	1	channel1-1:WT_DMSO_T0001_00012_CH4	3.036	1.812	2.979	78.921	0.677	0	0.1	0
2	WT	DMSO	25	8	2	channel1-1:WT_DMSO_T0002_00012_CH4	3.044	1.792	2.979	78.152	0.679	0.008	0.3	1.45317
2	WT	DMSO	50	8	3	channel1-1:WT_DMSO_T0003_00012_CH4	3.052	1.792	2.99	78.383	0.678	0.016	0.175	2.90634
2	WT	DMSO	75	8	4	channel1-1:WT_DMSO_T0004_00012_CH4	3.034	1.781	2.969	78.111	0.678	-0.002	0.4375	-0.363292
2	WT	DMSO	100	8	5	channel1-1:WT_DMSO_T0005_00012_CH4	3.073	1.792	3.01	78.461	0.671	0.037	0.7125	6.72091
2	WT	DMSO	125	8	6	channel1-1:WT_DMSO_T0006_00012_CH4	3.056	1.771	2.99	78.001	0.674	0.02	0.8375	3.63292
2	WT	DMSO	150	8	7	channel1-1:WT_DMSO_T0007_00012_CH4	3.083	1.792	3.021	78.5	0.676	0.047	1.55	8.53737
2	WT	DMSO	175	8	8	channel1-1:WT_DMSO_T0008_00012_CH4	3.113	1.792	3.052	78.615	0.68	0.077	2.0625	13.9868
2	WT	DMSO	200	8	9	channel1-1:WT_DMSO_T0009_00012_CH4	3.124	1.792	3.062	78.653	0.678	0.088	1.9375	15.9849
2	WT	DMSO	225	8	10	channel1-1:WT_DMSO_T0010_00012_CH4	3.103	1.792	3.042	78.577	0.677	0.067	2.1125	12.1703
2	WT	DMSO	250	8	11	channel1-1:WT_DMSO_T0011_00012_CH4	3.138	1.812	3.083	79.287	0.685	0.102	2.7	18.5279
2	WT	DMSO	275	8	12	channel1-1:WT_DMSO_T0012_00012_CH4	3.15	1.802	3.094	79.136	0.677	0.114	2.75	20.7077
2	WT	DMSO	300	8	13	channel1-1:WT_DMSO_T0013_00012_CH4	3.142	1.792	3.083	78.914	0.665	0.106	2.775	19.2545
2	WT	DMSO	325	8	14	channel1-1:WT_DMSO_T0014_00012_CH4	3.152	1.792	3.094	78.95	0.667	0.116	3.2375	21.071
2	WT	DMSO	350	8	15	channel1-1:WT_DMSO_T0015_00012_CH4	3.179	1.812	3.125	79.426	0.667	0.143	3.6	25.9754
2	WT	DMSO	375	8	16	channel1-1:WT_DMSO_T0016_00012_CH4	3.181	1.802	3.125	79.242	0.675	0.145	3.5	26.3387
2	WT	DMSO	400	8	17	channel1-1:WT_DMSO_T0017_00012_CH4	3.171	1.802	3.115	79.207	0.676	0.135	3.4	24.5222
2	WT	DMSO	425	8	18	channel1-1:WT_DMSO_T0018_00012_CH4	3.173	1.792	3.115	79.022	0.683	0.137	3.525	24.8855
2	WT	DMSO	450	8	19	channel1-1:WT_DMSO_T0019_00012_CH4	3.181	1.792	3.125	79.242	0.683	0.145	4.0375	26.3387
2	WT	DMSO	475	8	20	channel1-1:WT_DMSO_T0020_00012_CH4	3.214	1.792	3.156	79.164	0.684	0.178	4.425	32.333
2	WT	DMSO	500	8	21	channel1-1:WT_DMSO_T0021_00012_CH4	3.212	1.792	3.156	79.346	0.684	0.176	4.55	31.9697
2	WT	DMSO	525	8	22	channel1-1:WT_DMSO_T0022_00012_CH4	3.224	1.792	3.167	79.198	0.683	0.188	4.8	34.1495
2	WT	DMSO	550	8	23	channel1-1:WT_DMSO_T0023_00012_CH4	3.232	1.802	3.177	79.414	0.682	0.196	4.65	35.6026
2	WT	DMSO	575	8	24	channel1-1:WT_DMSO_T0024_00012_CH4	3.212	1.792	3.156	79.346	0.681	0.176	4.5	31.9697
2	WT	DMSO	600	8	25	channel1-1:WT_DMSO_T0025_00012_CH4	3.22	1.802	3.167	79.563	0.682	0.184	4.625	33.4229
2	WT	DMSO	625	8	26	channel1-1:WT_DMSO_T0026_00012_CH4	3.222	1.792	3.167	79.38	0.675	0.186	4.775	33.7862
2	WT	DMSO	650	8	27	channel1-1:WT_DMSO_T0027_00012_CH4	3.232	1.792	3.177	79.414	0.673	0.196	4.9625	35.6026
2	WT	DMSO	675	8	28	channel1-1:WT_DMSO_T0028_00012_CH4	3.237	1.802	3.188	79.992	0.68	0.201	4.9125	36.5109
2	WT	DMSO	700	8	29	channel1-1:WT_DMSO_T0029_00012_CH4	3.228	1.812	3.177	79.778	0.669	0.192	5.1125	34.8761
2	WT	DMSO	725	8	30	channel1-1:WT_DMSO_T0030_00012_CH4	3.253	1.792	3.198	79.482	0.668	0.217	5.2875	39.4172
2	WT	DMSO	750	8	31	channel1-1:WT_DMSO_T0031_00012_CH4	3.242	1.781	3.188	79.448	0.676	0.206	5.2375	37.4191
2	WT	DMSO	775	8	32	channel1-1:WT_DMSO_T0032_00012_CH4	3.249	1.802	3.198	79.843	0.667	0.213	5.525	38.6906
2	WT	DMSO	800	8	33	channel1-1:WT_DMSO_T0033_00012_CH4	3.265	1.781	3.208	79.335	0.67	0.229	6.0375	41.597
2	WT	DMSO	825	8	34	channel1-1:WT_DMSO_T0034_00012_CH4	3.29	1.802	3.24	79.971	0.678	0.254	6.2375	46.1381
2	WT	DMSO	850	8	35	channel1-1:WT_DMSO_T0035_00012_CH4	3.281	1.792	3.229	79.76	0.668	0.245	6.2125	44.5033
2	WT	DMSO	875	8	36	channel1-1:WT_DMSO_T0036_00012_CH4	3.288	1.802	3.24	80.15	0.68	0.252	6.45	45.7748
2	WT	DMSO	900	8	37	channel1-1:WT_DMSO_T0037_00012_CH4	3.3	1.802	3.25	80.002	0.67	0.264	6.525	47.9546
2	WT	DMSO	925	8	38	channel1-1:WT_DMSO_T0038_00012_CH4	3.294	1.792	3.24	79.614	0.679	0.258	6.55	46.8647
2	WT	DMSO	950	8	39	channel1-1:WT_DMSO_T0039_00012_CH4	3.302	1.792	3.25	79.824	0.674	0.266	7.1375	48.3179
2	WT	DMSO	975	8	40	channel1-1:WT_DMSO_T0040_00012_CH4	3.341	1.802	3.292	80.127	0.68	0.305	7.7375	55.4021
2	WT	DMSO	1000	8	41	channel1-1:WT_DMSO_T0041_00012_CH4	3.35	1.812	3.302	80.333	0.679	0.314	7.8625	57.0369
2	WT	DMSO	1025	8	42	channel1-1:WT_DMSO_T0042_00012_CH4	3.351	1.802	3.302	80.157	0.679	0.315	7.6	57.2185
2	WT	DMSO	1050	8	43	channel1-1:WT_DMSO_T0043_00012_CH4	3.329	1.802	3.281	80.272	0.678	0.293	7.5	53.2223
2	WT	DMSO	1075	8	44	channel1-1:WT_DMSO_T0044_00012_CH4	3.343	1.792	3.292	79.951	0.676	0.307	7.675	55.7654
2	WT	DMSO	1100	8	45	channel1-1:WT_DMSO_T0045_00012_CH4	3.343	1.792	3.292	79.951	0.677	0.307	7.675	55.7654
2	WT	DMSO	1125	8	46	channel1-1:WT_DMSO_T0046_00012_CH4	3.343	1.792	3.292	79.951	0.677	0.307	7.8875	55.7654
2	WT	DMSO	1150	8	47	channel1-1:WT_DMSO_T0047_00012_CH4	3.36	1.802	3.312	80.362	0.676	0.324	8.225	58.8534
2	WT	DMSO	1175	8	48	channel1-1:WT_DMSO_T0048_00012_CH4	3.37	1.812	3.323	80.392	0.668	0.334	8.25	60.6698
2	WT	DMSO	1200	8	49	channel1-1:WT_DMSO_T0049_00012_CH4	3.362	1.802	3.312	80.187	0.674	0.326	8.6375	59.2167
2	WT	DMSO	1225	8	50	channel1-1:WT_DMSO_T0050_00012_CH4	3.401	1.802	3.354	80.48	0.667	0.365	227.312	66.3009
2	WT	DMSO	0	9	1	channel1:WT_DMSO_T0001_00013_CH4	2.679	0.823	2.583	74.667	0.698	0	0.15	0
2	WT	DMSO	25	9	2	channel1:WT_DMSO_T0002_00013_CH4	2.691	0.812	2.594	74.511	0.697	0.012	0.525	2.17975
2	WT	DMSO	50	9	3	channel1:WT_DMSO_T0003_00013_CH4	2.709	0.823	2.615	74.842	0.698	0.03	1	5.44939
2	WT	DMSO	75	9	4	channel1:WT_DMSO_T0004_00013_CH4	2.729	0.823	2.635	74.956	0.699	0.05	1.4375	9.08231
2	WT	DMSO	100	9	5	channel1:WT_DMSO_T0005_00013_CH4	2.744	0.844	2.656	75.489	0.699	0.065	1.775	11.807
2	WT	DMSO	125	9	6	channel1:WT_DMSO_T0006_00013_CH4	2.756	0.833	2.667	75.334	0.699	0.077	2.2125	13.9868
2	WT	DMSO	150	9	7	channel1:WT_DMSO_T0007_00013_CH4	2.779	0.854	2.698	76.12	0.698	0.1	2.4	18.1646
2	WT	DMSO	175	9	8	channel1:WT_DMSO_T0008_00013_CH4	2.771	0.833	2.688	75.859	0.705	0.092	2.775	16.7114
2	WT	DMSO	200	9	9	channel1:WT_DMSO_T0009_00013_CH4	2.809	0.854	2.729	76.273	0.695	0.13	3.4125	23.614
2	WT	DMSO	225	9	10	channel1:WT_DMSO_T0010_00013_CH4	2.822	0.865	2.75	76.99	0.693	0.143	3.675	25.9754
2	WT	DMSO	250	9	11	channel1:WT_DMSO_T0011_00013_CH4	2.83	0.875	2.76	77.242	0.692	0.151	3.6125	27.4286
2	WT	DMSO	275	9	12	channel1:WT_DMSO_T0012_00013_CH4	2.817	0.854	2.74	76.529	0.693	0.138	3.7	25.0672
2	WT	DMSO	300	9	13	channel1:WT_DMSO_T0013_00013_CH4	2.837	0.854	2.76	76.627	0.695	0.158	4.3375	28.7001
2	WT	DMSO	325	9	14	channel1:WT_DMSO_T0014_00013_CH4	2.868	0.854	2.792	76.771	0.696	0.189	4.275	34.3311
2	WT	DMSO	350	9	15	channel1:WT_DMSO_T0015_00013_CH4	2.832	0.844	2.771	78.111	0.697	0.153	3.7375	27.7919
2	WT	DMSO	375	9	16	channel1:WT_DMSO_T0016_00013_CH4	2.825	0.854	2.75	76.784	0.697	0.146	3.8125	26.5203
2	WT	DMSO	400	9	17	channel1:WT_DMSO_T0017_00013_CH4	2.838	0.938	2.781	78.566	0.697	0.159	4.1	28.8817
2	WT	DMSO	425	9	18	channel1:WT_DMSO_T0018_00013_CH4	2.848	0.885	2.781	77.539	0.697	0.169	4.35	30.6982
2	WT	DMSO	450	9	19	channel1:WT_DMSO_T0019_00013_CH4	2.858	0.938	2.802	78.649	0.698	0.179	4.475	32.5147
2	WT	DMSO	475	9	20	channel1:WT_DMSO_T0020_00013_CH4	2.858	0.938	2.802	78.649	0.698	0.179	5.05	32.5147
2	WT	DMSO	500	9	21	channel1:WT_DMSO_T0021_00013_CH4	2.904	0.865	2.833	77.36	0.697	0.225	5.625	40.8704
2	WT	DMSO	525	9	22	channel1:WT_DMSO_T0022_00013_CH4	2.904	0.865	2.833	77.36	0.698	0.225	5.75	40.8704
2	WT	DMSO	550	9	23	channel1:WT_DMSO_T0023_00013_CH4	2.914	0.865	2.844	77.405	0.698	0.235	5.875	42.6868
2	WT	DMSO	575	9	24	channel1:WT_DMSO_T0024_00013_CH4	2.914	0.865	2.844	77.405	0.696	0.235	5.975	42.6868
2	WT	DMSO	600	9	25	channel1:WT_DMSO_T0025_00013_CH4	2.922	0.865	2.854	77.648	0.695	0.243	6.15	44.14
2	WT	DMSO	625	9	26	channel1:WT_DMSO_T0026_00013_CH4	2.928	0.938	2.875	79.13	0.696	0.249	6.375	45.2299
2	WT	DMSO	650	9	27	channel1:WT_DMSO_T0027_00013_CH4	2.94	0.875	2.875	77.934	0.7	0.261	6.475	47.4096
2	WT	DMSO	675	9	28	channel1:WT_DMSO_T0028_00013_CH4	2.936	0.948	2.885	79.368	0.699	0.257	6.625	46.6831
2	WT	DMSO	700	9	29	channel1:WT_DMSO_T0029_00013_CH4	2.952	0.865	2.885	77.778	0.698	0.273	6.925	49.5894
2	WT	DMSO	725	9	30	channel1:WT_DMSO_T0030_00013_CH4	2.96	0.875	2.896	78.018	0.695	0.281	7.1625	51.0426
2	WT	DMSO	750	9	31	channel1:WT_DMSO_T0031_00013_CH4	2.971	0.875	2.906	78.06	0.694	0.292	7.625	53.0407
2	WT	DMSO	775	9	32	channel1:WT_DMSO_T0032_00013_CH4	2.997	0.896	2.938	78.573	0.694	0.318	7.975	57.7635
2	WT	DMSO	800	9	33	channel1:WT_DMSO_T0033_00013_CH4	2.999	0.885	2.938	78.378	0.694	0.32	7.6	58.1268
2	WT	DMSO	825	9	34	channel1:WT_DMSO_T0034_00013_CH4	2.967	0.948	2.917	79.479	0.694	0.288	7.375	52.3141
2	WT	DMSO	850	9	35	channel1:WT_DMSO_T0035_00013_CH4	2.981	0.875	2.917	78.101	0.694	0.302	7.475	54.8571
2	WT	DMSO	875	9	36	channel1:WT_DMSO_T0036_00013_CH4	2.975	0.958	2.927	79.713	0.694	0.296	7.825	53.7673
2	WT	DMSO	900	9	37	channel1:WT_DMSO_T0037_00013_CH4	3.009	0.885	2.948	78.418	0.694	0.33	8.25	59.9432
2	WT	DMSO	925	9	38	channel1:WT_DMSO_T0038_00013_CH4	3.009	0.885	2.948	78.418	0.69	0.33	8.275	59.9432
2	WT	DMSO	950	9	39	channel1:WT_DMSO_T0039_00013_CH4	3.011	0.875	2.948	78.224	0.694	0.332	8.4	60.3065
2	WT	DMSO	975	9	40	channel1:WT_DMSO_T0040_00013_CH4	3.019	0.885	2.958	78.457	0.694	0.34	8.6125	61.7597
2	WT	DMSO	1000	9	41	channel1:WT_DMSO_T0041_00013_CH4	3.028	0.885	2.969	78.69	0.694	0.349	8.55	63.3945
2	WT	DMSO	1025	9	42	channel1:WT_DMSO_T0042_00013_CH4	3.014	0.958	2.969	80.049	0.694	0.335	8.675	60.8515
2	WT	DMSO	1050	9	43	channel1:WT_DMSO_T0043_00013_CH4	3.038	0.885	2.979	78.729	0.694	0.359	9.075	65.211
2	WT	DMSO	1075	9	44	channel1:WT_DMSO_T0044_00013_CH4	3.046	0.896	2.99	78.959	0.694	0.367	9.175	66.6641
2	WT	DMSO	1100	9	45	channel1:WT_DMSO_T0045_00013_CH4	3.046	0.896	2.99	78.959	0.694	0.367	9.0125	66.6641
2	WT	DMSO	1125	9	46	channel1:WT_DMSO_T0046_00013_CH4	3.033	0.969	2.99	80.311	0.694	0.354	8.975	64.3027
2	WT	DMSO	1150	9	47	channel1:WT_DMSO_T0047_00013_CH4	3.043	0.969	3	80.344	0.698	0.364	9.75	66.1192
2	WT	DMSO	1175	9	48	channel1:WT_DMSO_T0048_00013_CH4	3.095	0.906	3.042	79.333	0.694	0.416	10.525	75.5648
2	WT	DMSO	1200	9	49	channel1:WT_DMSO_T0049_00013_CH4	3.105	0.906	3.052	79.369	0.694	0.426	10.3	77.3813
2	WT	DMSO	1225	9	50	channel1:WT_DMSO_T0050_00013_CH4	3.077	0.896	3.021	79.071	0.697	0.398	287.2	72.2952
2	WT	DMSO	0	10	1	channel1:WT_DMSO_T0001_00014_CH4	2.1	0.781	2.042	76.515	0.661	0	0.15	0
2	WT	DMSO	25	10	2	channel1:WT_DMSO_T0002_00014_CH4	2.112	0.781	2.052	76.306	0.662	0.012	0.55	2.17975
2	WT	DMSO	50	10	3	channel1:WT_DMSO_T0003_00014_CH4	2.132	0.781	2.073	76.439	0.661	0.032	0.925	5.81268
2	WT	DMSO	75	10	4	channel1:WT_DMSO_T0004_00014_CH4	2.142	0.781	2.083	76.504	0.663	0.042	1.4375	7.62914
2	WT	DMSO	100	10	5	channel1:WT_DMSO_T0005_00014_CH4	2.173	0.781	2.115	76.697	0.662	0.073	2.075	13.2602
2	WT	DMSO	125	10	6	channel1:WT_DMSO_T0006_00014_CH4	2.193	0.781	2.135	76.822	0.663	0.093	2.55	16.8931
2	WT	DMSO	150	10	7	channel1:WT_DMSO_T0007_00014_CH4	2.211	0.792	2.156	77.208	0.663	0.111	3.025	20.1627
2	WT	DMSO	175	10	8	channel1:WT_DMSO_T0008_00014_CH4	2.231	0.792	2.177	77.326	0.662	0.131	3.4125	23.7956
2	WT	DMSO	200	10	9	channel1:WT_DMSO_T0009_00014_CH4	2.242	0.792	2.188	77.385	0.663	0.142	3.775	25.7938
2	WT	DMSO	225	10	10	channel1:WT_DMSO_T0010_00014_CH4	2.26	0.802	2.208	77.758	0.663	0.16	4.275	29.0634
2	WT	DMSO	250	10	11	channel1:WT_DMSO_T0011_00014_CH4	2.282	0.792	2.229	77.613	0.663	0.182	4.65	33.0596
2	WT	DMSO	275	10	12	channel1:WT_DMSO_T0012_00014_CH4	2.29	0.802	2.24	77.923	0.663	0.19	5.0125	34.5128
2	WT	DMSO	300	10	13	channel1:WT_DMSO_T0013_00014_CH4	2.311	0.802	2.26	78.032	0.662	0.211	5.4	38.3273
2	WT	DMSO	325	10	14	channel1:WT_DMSO_T0014_00014_CH4	2.321	0.802	2.271	78.085	0.663	0.221	5.75	40.1438
2	WT	DMSO	350	10	15	channel1:WT_DMSO_T0015_00014_CH4	2.339	0.812	2.292	78.44	0.662	0.239	6.075	43.4134
2	WT	DMSO	375	10	16	channel1:WT_DMSO_T0016_00014_CH4	2.347	0.823	2.302	78.74	0.662	0.247	6.3375	44.8666
2	WT	DMSO	400	10	17	channel1:WT_DMSO_T0017_00014_CH4	2.36	0.823	2.312	78.541	0.667	0.26	6.625	47.228
2	WT	DMSO	425	10	18	channel1:WT_DMSO_T0018_00014_CH4	2.37	0.823	2.323	78.591	0.668	0.27	6.85	49.0445
2	WT	DMSO	450	10	19	channel1:WT_DMSO_T0019_00014_CH4	2.378	0.823	2.333	78.887	0.667	0.278	6.6625	50.4976
2	WT	DMSO	475	10	20	channel1:WT_DMSO_T0020_00014_CH4	2.355	0.906	2.323	80.579	0.668	0.255	6.8125	46.3198
2	WT	DMSO	500	10	21	channel1:WT_DMSO_T0021_00014_CH4	2.39	0.823	2.344	78.69	0.663	0.29	7.4875	52.6774
2	WT	DMSO	525	10	22	channel1:WT_DMSO_T0022_00014_CH4	2.409	0.833	2.365	79.03	0.668	0.309	7.6375	56.1287
2	WT	DMSO	550	10	23	channel1:WT_DMSO_T0023_00014_CH4	2.402	0.812	2.354	78.495	0.668	0.302	7.25	54.8571
2	WT	DMSO	575	10	24	channel1:WT_DMSO_T0024_00014_CH4	2.378	0.833	2.333	78.887	0.666	0.278	7.3375	50.4976
2	WT	DMSO	600	10	25	channel1:WT_DMSO_T0025_00014_CH4	2.409	0.833	2.365	79.03	0.663	0.309	7.825	56.1287
2	WT	DMSO	625	10	26	channel1:WT_DMSO_T0026_00014_CH4	2.417	0.844	2.375	79.32	0.664	0.317	8.075	57.5818
2	WT	DMSO	650	10	27	channel1:WT_DMSO_T0027_00014_CH4	2.429	0.833	2.385	79.124	0.662	0.329	8.6125	59.7616
2	WT	DMSO	675	10	28	channel1:WT_DMSO_T0028_00014_CH4	2.46	0.833	2.417	79.261	0.663	0.36	9.125	65.3926
2	WT	DMSO	700	10	29	channel1:WT_DMSO_T0029_00014_CH4	2.47	0.833	2.427	79.306	0.662	0.37	9	67.2091
2	WT	DMSO	725	10	30	channel1:WT_DMSO_T0030_00014_CH4	2.45	0.833	2.406	79.216	0.662	0.35	8.725	63.5762
2	WT	DMSO	750	10	31	channel1:WT_DMSO_T0031_00014_CH4	2.448	0.844	2.406	79.455	0.662	0.348	9.2125	63.2129
2	WT	DMSO	775	10	32	channel1:WT_DMSO_T0032_00014_CH4	2.489	0.844	2.448	79.631	0.662	0.389	9.725	70.6604
2	WT	DMSO	800	10	33	channel1:WT_DMSO_T0033_00014_CH4	2.489	0.844	2.448	79.631	0.662	0.389	9.825	70.6604
2	WT	DMSO	825	10	34	channel1:WT_DMSO_T0034_00014_CH4	2.497	0.854	2.458	79.909	0.663	0.397	9.975	72.1135
2	WT	DMSO	850	10	35	channel1:WT_DMSO_T0035_00014_CH4	2.501	0.833	2.458	79.439	0.663	0.401	10.05	72.8401
2	WT	DMSO	875	10	36	channel1:WT_DMSO_T0036_00014_CH4	2.503	0.833	2.458	79.205	0.666	0.403	10.175	73.2034
2	WT	DMSO	900	10	37	channel1:WT_DMSO_T0037_00014_CH4	2.511	0.844	2.469	79.483	0.663	0.411	10.425	74.6566
2	WT	DMSO	925	10	38	channel1:WT_DMSO_T0038_00014_CH4	2.523	0.833	2.479	79.293	0.664	0.423	10.575	76.8363
2	WT	DMSO	950	10	39	channel1:WT_DMSO_T0039_00014_CH4	2.523	0.833	2.479	79.293	0.665	0.423	10.7	76.8363
2	WT	DMSO	975	10	40	channel1:WT_DMSO_T0040_00014_CH4	2.533	0.833	2.49	79.337	0.665	0.433	10.9375	78.6528
2	WT	DMSO	1000	10	41	channel1:WT_DMSO_T0041_00014_CH4	2.542	0.844	2.5	79.611	0.666	0.442	10.5375	80.2876
2	WT	DMSO	1025	10	42	channel1:WT_DMSO_T0042_00014_CH4	2.501	0.844	2.458	79.439	0.664	0.401	10.4	72.8401
2	WT	DMSO	1050	10	43	channel1:WT_DMSO_T0043_00014_CH4	2.531	0.844	2.49	79.569	0.663	0.431	10.9125	78.2895
2	WT	DMSO	1075	10	44	channel1:WT_DMSO_T0044_00014_CH4	2.542	0.844	2.5	79.611	0.664	0.442	10.9125	80.2876
2	WT	DMSO	1100	10	45	channel1:WT_DMSO_T0045_00014_CH4	2.531	0.844	2.49	79.569	0.666	0.431	10.775	78.2895
2	WT	DMSO	1125	10	46	channel1:WT_DMSO_T0046_00014_CH4	2.531	0.844	2.49	79.569	0.665	0.431	10.9125	78.2895
2	WT	DMSO	1150	10	47	channel1:WT_DMSO_T0047_00014_CH4	2.542	0.844	2.5	79.611	0.662	0.442	11.05	80.2876
2	WT	DMSO	1175	10	48	channel1:WT_DMSO_T0048_00014_CH4	2.542	0.844	2.5	79.611	0.661	0.442	11.175	80.2876
2	WT	DMSO	1200	10	49	channel1:WT_DMSO_T0049_00014_CH4	2.552	0.844	2.51	79.653	0.666	0.452	11.7125	82.1041
2	WT	DMSO	1225	10	50	channel1:WT_DMSO_T0050_00014_CH4	2.585	0.833	2.542	79.551	0.666	0.485	363.412	88.0984
2	WT	DMSO	0	11	1	channel1:WT_DMSO_T0001_00015_CH4	2.289	1.01	1.875	55.008	0.606	0	0.175	0
2	WT	DMSO	25	11	2	channel1:WT_DMSO_T0002_00015_CH4	2.303	1	1.885	54.944	0.604	0.014	0.425	2.54305
2	WT	DMSO	50	11	3	channel1:WT_DMSO_T0003_00015_CH4	2.309	0.99	1.885	54.733	0.604	0.02	0.6875	3.63292
2	WT	DMSO	75	11	4	channel1:WT_DMSO_T0004_00015_CH4	2.324	0.99	1.896	54.671	0.605	0.035	1.0125	6.35762
2	WT	DMSO	100	11	5	channel1:WT_DMSO_T0005_00015_CH4	2.335	0.99	1.917	55.176	0.604	0.046	1.3	8.35572
2	WT	DMSO	125	11	6	channel1:WT_DMSO_T0006_00015_CH4	2.347	0.979	1.917	54.758	0.606	0.058	1.475	10.5355
2	WT	DMSO	150	11	7	channel1:WT_DMSO_T0007_00015_CH4	2.349	0.979	1.927	55.112	0.606	0.06	1.6875	10.8988
2	WT	DMSO	175	11	8	channel1:WT_DMSO_T0008_00015_CH4	2.364	0.969	1.938	55.049	0.606	0.075	1.975	13.6235
2	WT	DMSO	200	11	9	channel1:WT_DMSO_T0009_00015_CH4	2.372	0.969	1.948	55.193	0.606	0.083	2.1875	15.0766
2	WT	DMSO	225	11	10	channel1:WT_DMSO_T0010_00015_CH4	2.381	0.969	1.958	55.337	0.605	0.092	2.375	16.7114
2	WT	DMSO	250	11	11	channel1:WT_DMSO_T0011_00015_CH4	2.387	0.958	1.958	55.131	0.606	0.098	2.525	17.8013
2	WT	DMSO	275	11	12	channel1:WT_DMSO_T0012_00015_CH4	2.393	0.948	1.958	54.926	0.603	0.104	2.7	18.8912
2	WT	DMSO	300	11	13	channel1:WT_DMSO_T0013_00015_CH4	2.401	0.948	1.969	55.069	0.605	0.112	2.7625	20.3444
2	WT	DMSO	325	11	14	channel1:WT_DMSO_T0014_00015_CH4	2.398	0.948	1.979	55.62	0.605	0.109	2.6875	19.7994
2	WT	DMSO	350	11	15	channel1:WT_DMSO_T0015_00015_CH4	2.395	0.948	1.99	56.172	0.605	0.106	2.9125	19.2545
2	WT	DMSO	375	11	16	channel1:WT_DMSO_T0016_00015_CH4	2.416	0.927	1.979	55.008	0.606	0.127	2.9875	23.0691
2	WT	DMSO	400	11	17	channel1:WT_DMSO_T0017_00015_CH4	2.401	0.938	1.99	55.965	0.606	0.112	2.875	20.3444
2	WT	DMSO	425	11	18	channel1:WT_DMSO_T0018_00015_CH4	2.407	0.927	1.99	55.76	0.605	0.118	3.05	21.4342
2	WT	DMSO	450	11	19	channel1:WT_DMSO_T0019_00015_CH4	2.415	0.927	2	55.899	0.606	0.126	3.1125	22.8874
2	WT	DMSO	475	11	20	channel1:WT_DMSO_T0020_00015_CH4	2.412	0.938	2.01	56.447	0.607	0.123	3.45	22.3425
2	WT	DMSO	500	11	21	channel1:WT_DMSO_T0021_00015_CH4	2.442	0.927	2.01	55.429	0.606	0.153	3.4875	27.7919
2	WT	DMSO	525	11	22	channel1:WT_DMSO_T0022_00015_CH4	2.415	0.938	2.021	56.79	0.607	0.126	3.3	22.8874
2	WT	DMSO	550	11	23	channel1:WT_DMSO_T0023_00015_CH4	2.427	0.927	2.021	56.378	0.606	0.138	3.8125	25.0672
2	WT	DMSO	575	11	24	channel1:WT_DMSO_T0024_00015_CH4	2.456	0.917	2.021	55.366	0.606	0.167	4.2875	30.3349
2	WT	DMSO	600	11	25	channel1:WT_DMSO_T0025_00015_CH4	2.465	0.917	2.031	55.504	0.607	0.176	4.475	31.9697
2	WT	DMSO	625	11	26	channel1:WT_DMSO_T0026_00015_CH4	2.471	0.906	2.031	55.305	0.606	0.182	4.6125	33.0596
2	WT	DMSO	650	11	27	channel1:WT_DMSO_T0027_00015_CH4	2.476	0.906	2.031	55.107	0.607	0.187	4.7875	33.9678
2	WT	DMSO	675	11	28	channel1:WT_DMSO_T0028_00015_CH4	2.485	0.906	2.042	55.244	0.607	0.196	4.825	35.6026
2	WT	DMSO	700	11	29	channel1:WT_DMSO_T0029_00015_CH4	2.479	0.896	2.042	55.442	0.605	0.19	4.8625	34.5128
2	WT	DMSO	725	11	30	channel1:WT_DMSO_T0030_00015_CH4	2.488	0.906	2.052	55.578	0.606	0.199	4.975	36.1476
2	WT	DMSO	750	11	31	channel1:WT_DMSO_T0031_00015_CH4	2.488	0.896	2.052	55.578	0.605	0.199	5.05	36.1476
2	WT	DMSO	775	11	32	channel1:WT_DMSO_T0032_00015_CH4	2.494	0.885	2.052	55.381	0.606	0.205	5.225	37.2375
2	WT	DMSO	800	11	33	channel1:WT_DMSO_T0033_00015_CH4	2.502	0.896	2.062	55.516	0.608	0.213	5.3625	38.6906
2	WT	DMSO	825	11	34	channel1:WT_DMSO_T0034_00015_CH4	2.505	0.896	2.073	55.847	0.607	0.216	5.475	39.2356
2	WT	DMSO	850	11	35	channel1:WT_DMSO_T0035_00015_CH4	2.511	0.896	2.073	55.651	0.607	0.222	5.625	40.3254
2	WT	DMSO	875	11	36	channel1:WT_DMSO_T0036_00015_CH4	2.517	0.885	2.073	55.455	0.608	0.228	5.8	41.4153
2	WT	DMSO	900	11	37	channel1:WT_DMSO_T0037_00015_CH4	2.525	0.885	2.083	55.589	0.606	0.236	5.975	42.8685
2	WT	DMSO	925	11	38	channel1:WT_DMSO_T0038_00015_CH4	2.531	0.875	2.083	55.394	0.607	0.242	6.0875	43.9584
2	WT	DMSO	950	11	39	channel1:WT_DMSO_T0039_00015_CH4	2.534	0.885	2.094	55.722	0.607	0.245	6.225	44.5033
2	WT	DMSO	975	11	40	channel1:WT_DMSO_T0040_00015_CH4	2.542	0.885	2.104	55.854	0.607	0.253	6.2625	45.9565
2	WT	DMSO	1000	11	41	channel1:WT_DMSO_T0041_00015_CH4	2.537	0.885	2.104	56.049	0.607	0.248	6.3	45.0482
2	WT	DMSO	1025	11	42	channel1:WT_DMSO_T0042_00015_CH4	2.545	0.885	2.115	56.18	0.607	0.256	6.475	46.5014
2	WT	DMSO	1050	11	43	channel1:WT_DMSO_T0043_00015_CH4	2.551	0.875	2.115	55.985	0.608	0.262	6.625	47.5913
2	WT	DMSO	1075	11	44	channel1:WT_DMSO_T0044_00015_CH4	2.557	0.865	2.115	55.792	0.608	0.268	6.7375	48.6812
2	WT	DMSO	1100	11	45	channel1:WT_DMSO_T0045_00015_CH4	2.56	0.875	2.125	56.116	0.608	0.271	6.85	49.2261
2	WT	DMSO	1125	11	46	channel1:WT_DMSO_T0046_00015_CH4	2.566	0.865	2.125	55.923	0.608	0.277	6.9875	50.316
2	WT	DMSO	1150	11	47	channel1:WT_DMSO_T0047_00015_CH4	2.571	0.854	2.125	55.731	0.608	0.282	7.0875	51.2242
2	WT	DMSO	1175	11	48	channel1:WT_DMSO_T0048_00015_CH4	2.574	0.865	2.135	56.053	0.609	0.285	7.125	51.7692
2	WT	DMSO	1200	11	49	channel1:WT_DMSO_T0049_00015_CH4	2.574	0.854	2.135	56.053	0.608	0.285	7.3125	51.7692
2	WT	DMSO	1225	11	50	channel1:WT_DMSO_T0050_00015_CH4	2.589	0.854	2.146	55.99	0.61	0.3	204.375	54.4939
2	WT	DMSO	0	12	1	channel1:WT_DMSO_T0001_00016_CH4	2.655	1.115	2.438	66.654	0.678	0	0.2875	0
2	WT	DMSO	25	12	2	channel1:WT_DMSO_T0002_00016_CH4	2.678	1.104	2.458	66.626	0.682	0.023	0.65	4.17786
2	WT	DMSO	50	12	3	channel1:WT_DMSO_T0003_00016_CH4	2.684	1.104	2.469	66.918	0.678	0.029	0.95	5.26774
2	WT	DMSO	75	12	4	channel1:WT_DMSO_T0004_00016_CH4	2.702	1.146	2.51	68.281	0.678	0.047	1.425	8.53737
2	WT	DMSO	100	12	5	channel1:WT_DMSO_T0005_00016_CH4	2.722	1.083	2.51	67.262	0.667	0.067	2.0625	12.1703
2	WT	DMSO	125	12	6	channel1:WT_DMSO_T0006_00016_CH4	2.753	1.073	2.531	66.83	0.675	0.098	2.525	17.8013
2	WT	DMSO	150	12	7	channel1:WT_DMSO_T0007_00016_CH4	2.759	1.062	2.542	67.114	0.659	0.104	2.8375	18.8912
2	WT	DMSO	175	12	8	channel1:WT_DMSO_T0008_00016_CH4	2.778	1.062	2.562	67.281	0.665	0.123	3.2625	22.3425
2	WT	DMSO	200	12	9	channel1:WT_DMSO_T0009_00016_CH4	2.793	1.073	2.583	67.643	0.662	0.138	3.575	25.0672
2	WT	DMSO	225	12	10	channel1:WT_DMSO_T0010_00016_CH4	2.803	1.062	2.594	67.724	0.669	0.148	3.875	26.8836
2	WT	DMSO	250	12	11	channel1:WT_DMSO_T0011_00016_CH4	2.817	1.052	2.604	67.608	0.676	0.162	4.2875	29.4267
2	WT	DMSO	275	12	12	channel1:WT_DMSO_T0012_00016_CH4	2.836	1.062	2.625	67.769	0.676	0.181	4.525	32.878
2	WT	DMSO	300	12	13	channel1:WT_DMSO_T0013_00016_CH4	2.836	1.042	2.625	67.769	0.676	0.181	4.6375	32.878
2	WT	DMSO	325	12	14	channel1:WT_DMSO_T0014_00016_CH4	2.845	1.052	2.635	67.848	0.662	0.19	4.925	34.5128
2	WT	DMSO	350	12	15	channel1:WT_DMSO_T0015_00016_CH4	2.859	1.042	2.646	67.733	0.677	0.204	5.175	37.0558
2	WT	DMSO	375	12	16	channel1:WT_DMSO_T0016_00016_CH4	2.865	1.042	2.656	68.005	0.674	0.21	5.4125	38.1457
2	WT	DMSO	400	12	17	channel1:WT_DMSO_T0017_00016_CH4	2.878	1.042	2.667	67.891	0.668	0.223	5.75	40.5071
2	WT	DMSO	425	12	18	channel1:WT_DMSO_T0018_00016_CH4	2.892	1.042	2.677	67.777	0.669	0.237	5.875	43.0501
2	WT	DMSO	450	12	19	channel1:WT_DMSO_T0019_00016_CH4	2.888	1.094	2.698	69.081	0.671	0.233	5.95	42.3236
2	WT	DMSO	475	12	20	channel1:WT_DMSO_T0020_00016_CH4	2.898	1.094	2.708	69.155	0.677	0.243	6.2375	44.14
2	WT	DMSO	500	12	21	channel1:WT_DMSO_T0021_00016_CH4	2.911	1.083	2.719	69.036	0.68	0.256	6.4	46.5014
2	WT	DMSO	525	12	22	channel1:WT_DMSO_T0022_00016_CH4	2.911	1.083	2.719	69.036	0.67	0.256	6.525	46.5014
2	WT	DMSO	550	12	23	channel1:WT_DMSO_T0023_00016_CH4	2.921	1.083	2.729	69.109	0.674	0.266	6.7	48.3179
2	WT	DMSO	575	12	24	channel1:WT_DMSO_T0024_00016_CH4	2.925	1.073	2.729	68.919	0.671	0.27	6.8625	49.0445
2	WT	DMSO	600	12	25	channel1:WT_DMSO_T0025_00016_CH4	2.934	1.021	2.719	67.896	0.684	0.279	7.1	50.6793
2	WT	DMSO	625	12	26	channel1:WT_DMSO_T0026_00016_CH4	2.944	1.021	2.729	67.973	0.677	0.289	7.35	52.4957
2	WT	DMSO	650	12	27	channel1:WT_DMSO_T0027_00016_CH4	2.954	1.073	2.76	69.137	0.674	0.299	7.425	54.3122
2	WT	DMSO	675	12	28	channel1:WT_DMSO_T0028_00016_CH4	2.95	1.073	2.76	69.326	0.672	0.295	7.575	53.5856
2	WT	DMSO	700	12	29	channel1:WT_DMSO_T0029_00016_CH4	2.966	1.073	2.781	69.656	0.671	0.311	7.8625	56.492
2	WT	DMSO	725	12	30	channel1:WT_DMSO_T0030_00016_CH4	2.973	1.01	2.76	68.199	0.677	0.318	7.9	57.7635
2	WT	DMSO	750	12	31	channel1:WT_DMSO_T0031_00016_CH4	2.969	1.01	2.76	68.385	0.678	0.314	7.9875	57.0369
2	WT	DMSO	775	12	32	channel1:WT_DMSO_T0032_00016_CH4	2.98	1.073	2.792	69.538	0.679	0.325	8.2375	59.035
2	WT	DMSO	800	12	33	channel1:WT_DMSO_T0033_00016_CH4	2.989	1.01	2.781	68.532	0.677	0.334	8.35	60.6698
2	WT	DMSO	825	12	34	channel1:WT_DMSO_T0034_00016_CH4	2.989	1.01	2.781	68.532	0.675	0.334	8.4625	60.6698
2	WT	DMSO	850	12	35	channel1:WT_DMSO_T0035_00016_CH4	2.998	1.021	2.792	68.605	0.683	0.343	8.7125	62.3046
2	WT	DMSO	875	12	36	channel1:WT_DMSO_T0036_00016_CH4	3.009	1.062	2.823	69.746	0.681	0.354	8.85	64.3027
2	WT	DMSO	900	12	37	channel1:WT_DMSO_T0037_00016_CH4	3.009	1.062	2.823	69.746	0.681	0.354	8.8875	64.3027
2	WT	DMSO	925	12	38	channel1:WT_DMSO_T0038_00016_CH4	3.012	1	2.802	68.493	0.675	0.357	8.925	64.8477
2	WT	DMSO	950	12	39	channel1:WT_DMSO_T0039_00016_CH4	3.012	1.062	2.833	70.186	0.683	0.357	9.0375	64.8477
2	WT	DMSO	975	12	40	channel1:WT_DMSO_T0040_00016_CH4	3.021	1.062	2.844	70.253	0.68	0.366	9.1125	66.4825
2	WT	DMSO	1000	12	41	channel1:WT_DMSO_T0041_00016_CH4	3.018	1.062	2.844	70.439	0.676	0.363	9.2875	65.9376
2	WT	DMSO	1025	12	42	channel1:WT_DMSO_T0042_00016_CH4	3.035	1	2.823	68.454	0.678	0.38	9.4375	69.0255
2	WT	DMSO	1050	12	43	channel1:WT_DMSO_T0043_00016_CH4	3.03	1	2.833	69.26	0.665	0.375	9.7375	68.1173
2	WT	DMSO	1075	12	44	channel1:WT_DMSO_T0044_00016_CH4	3.059	1.052	2.865	69.467	0.665	0.404	10.225	73.3851
2	WT	DMSO	1100	12	45	channel1:WT_DMSO_T0045_00016_CH4	3.069	1.052	2.875	69.535	0.673	0.414	10.4625	75.2015
2	WT	DMSO	1125	12	46	channel1:WT_DMSO_T0046_00016_CH4	3.078	1.052	2.885	69.603	0.662	0.423	10.5	76.8363
2	WT	DMSO	1150	12	47	channel1:WT_DMSO_T0047_00016_CH4	3.072	0.99	2.854	68.307	0.676	0.417	10.4625	75.7465
2	WT	DMSO	1175	12	48	channel1:WT_DMSO_T0048_00016_CH4	3.075	1.052	2.885	69.785	0.68	0.42	10.625	76.2914
2	WT	DMSO	1200	12	49	channel1:WT_DMSO_T0049_00016_CH4	3.085	1.052	2.896	69.852	0.675	0.43	10.75	78.1079
[truncated: 83,401 more rows]

## Sheet: Response_DATA
Genotype	Response
WT_IAA	0.439105485706484
WT_IAA	0.45280991370483
WT_IAA	0.225602640656309
WT_IAA	0.342090278642246
WT_IAA	0.549825120769068
WT_IAA	0.476575820486771
WT_IAA	0.357225865260673
WT_IAA	0.6933312987644
WT_IAA	0.460789707222854
WT_IAA	0.488849089865036
WT_IAA	0.281504563725509
WT_IAA	0.287792987965258
WT_IAA	0.236141172313265
WT_IAA	0.447302121439672
WT_IAA	0.59089503632107
WT_IAA	0.242689807211208
WT_IAA	0.412217051026185
WT_IAA	0.378042717916388
WT_IAA	0.433684430327392
WT_IAA	0.084611832356874
WT_IAA	0.106339422316276
WT_IAA	0.262682659449301
WT_IAA	0.134008488971165
WT_IAA	0.195114625204293
WT_IAA	0.0871272020527727
WT_IAA	0.274218665296009
WT_IAA	0.284453617851738
WT_IAA	0.207084315481329
WT_IAA	0.156169763360895
WT_IAA	0.2262531673018
WT_IAA	0.33532480152914
WT_IAA	0.0807086724839275
WT_IAA	0.0710375096876268
WT_IAA	0.191775255090773
WT_IAA	0.342914279059868
WT_IAA	0.313250264025475
WT_IAA	0.419156001911424
WT_IAA	0.413821683418396
WT_IAA	0.186440936597747
WT_IAA	0.234883487465315
WT_IAA	0.157297342879745
WT_IAA	0.176639668472348
WT_IAA	0.199928522380928
WT_IAA	0.140470386983041
WT_IAA	0.332982905605371
WT_IAA	0.431516008175755
WT_IAA	0.352281862754941
WT_IAA	0.328255745314803
WT_IAA	0.294775307293529
WT_IAA	0.21185484421493
WT_IAA	0.203788313810842
WT_IAA	0.152656919475241
WT_IAA	0.263072975436597
WT_IAA	0.300499941773849
WT_IAA	0.251710443362019
WT_IAA	0.102089314899067
WT_IAA	0.0483124455384712
WT_IAA	0.266759293094378
WT_IAA	0.226166430415735
afb1_IAA	1.15763346408437
afb1_IAA	1.17945345978972
afb1_IAA	1.17838646733469
afb1_IAA	1.51619627859707
afb1_IAA	1.1425355208457
afb1_IAA	0.980726115040458
afb1_IAA	1.26390591260532
afb1_IAA	0.894779872787825
afb1_IAA	1.06277783483224
afb1_IAA	1.10204315717732
afb1_IAA	1.30695905816576
afb1_IAA	1.28359192340061
afb1_IAA	1.02260556890037
afb1_IAA	1.2057548238062
afb1_IAA	1.22794826687082
afb1_IAA	1.39434574023269
afb1_IAA	0.852206873832144
afb1_IAA	1.06656565804759
afb1_IAA	1.24427325143277
afb1_IAA	0.476892277775481
afb1_IAA	0.783279161237232
afb1_IAA	0.958425972730341
afb1_IAA	1.13981469008537
afb1_IAA	0.979072276735162
afb1_IAA	1.23248298480469
afb1_IAA	0.65636040871146
afb1_IAA	0.967175310861584
afb1_IAA	0.674232532333206
afb1_IAA	0.856688242143267
afb1_IAA	0.802751773541522
afb1_IAA	0.829586633785516
afb1_IAA	0.876854399543327
afb1_IAA	0.892912635991523
afb1_IAA	0.542832411496309
afb1_IAA	0.343358172028526
afb1_IAA	1.2127969740094
afb1_IAA	1.5914725962994
afb1_IAA	1.05754957180259
afb1_IAA	0.929297078708033
afb1_IAA	1.02938097098981
afb1_IAA	1.44091996089473
afb1_IAA	0.468142939644239
afb1_IAA	1.03439583552845
afb1_IAA	0.636941146029921
afb1_IAA	0.563425365878383
afb1_IAA	0.83833597191676
afb1_IAA	0.844257780042173
afb1_IAA	0.621683153922999
afb1_IAA	0.642382807550573
afb1_IAA	0.670551408363353
afb1_IAA	0.674445930824212
afb1_IAA	0.713497854678296
afb1_IAA	0.56881367777628
afb1_IAA	0.758684985148799
afb1_IAA	0.592714308768945
afb1_IAA	0.645797183406667
tir1afb1_IAA	0.943315431371583
tir1afb1_IAA	0.610310275785768
tir1afb1_IAA	1.01844812835662
tir1afb1_IAA	0.891200566173803
tir1afb1_IAA	1.12366507952861
tir1afb1_IAA	0.526448468777575
tir1afb1_IAA	0.742182187921326
tir1afb1_IAA	1.11197430717616
tir1afb1_IAA	1.00987489529816
tir1afb1_IAA	1.08417624847146
tir1afb1_IAA	1.0831370687068
tir1afb1_IAA	0.443158210639947
tir1afb1_IAA	0.90226783066745
tir1afb1_IAA	0.781671018978469
tir1afb1_IAA	1.03819254388519
tir1afb1_IAA	0.802766368201099
tir1afb1_IAA	0.676869739712345
tir1afb1_IAA	1.07986365244812
tir1afb1_IAA	1.10729799823519
tir1afb1_IAA	0.959110963794438
tir1afb1_IAA	1.03013890070906
tir1afb1_IAA	0.895772957138313
tir1afb1_IAA	1.00701715094534
tir1afb1_IAA	1.19152351816101
tir1afb1_IAA	1.28567320483935
tir1afb1_IAA	1.15499634943316
tir1afb1_IAA	1.26062897251101
tir1afb1_IAA	1.19058825637281
tir1afb1_IAA	0.928818873654553
tir1afb1_IAA	0.651098081548736
tir1afb1_IAA	1.36839191410642
tir1afb1_IAA	0.93770386064241
tir1afb1_IAA	1.06780916717804
tir1afb1_IAA	0.637173072702269
tir1afb1_IAA	1.07809704684819
tir1afb1_IAA	0.724723967875011
tir1afb1_IAA	0.820120670270948
tir1afb1_IAA	0.986701186546205
tir1afb1_IAA	0.500261138708103
tir1afb1_IAA	0.956980645276884
tir1afb1_IAA	0.579082923857686
tir1afb1_IAA	0.869481709092375
tir1afb1_IAA	0.56162470381137
tir1afb1_IAA	0.582408299104602
tir1afb1_IAA	0.591864834963023
tir1afb1_IAA	0.562404088634866
tir1afb1_IAA	1.03133395743842
tir1afb1_IAA	0.671258168983172
tir1afb1_IAA	0.55757190272919
tir1afb1_IAA	0.492519249461373
tir1afb1_IAA	0.505041365625545
tir1afb1.2_IAA	1.06774786388921
tir1afb1.2_IAA	0.972487040640846
tir1afb1.2_IAA	0.871420030851516
tir1afb1.2_IAA	0.395755579228614
tir1afb1.2_IAA	1.10883401441214
tir1afb1.2_IAA	0.519112440738763
tir1afb1.2_IAA	0.58681848040289
tir1afb1.2_IAA	1.07763806299712
tir1afb1.2_IAA	1.15336451288309
tir1afb1.2_IAA	0.798842699089462
tir1afb1.2_IAA	0.537662714687438
tir1afb1.2_IAA	0.671795464777851
tir1afb1.2_IAA	1.0315822104349
tir1afb1.2_IAA	0.80740436398885
tir1afb1.2_IAA	0.917033038677567
tir1afb1.2_IAA	0.60581159908774
tir1afb1.2_IAA	0.54858621817976
tir1afb1.2_IAA	0.906109535185245
tir1afb1.2_IAA	0.190669261408788
tir1afb1.2_IAA	0.971847376021926
tir1afb1.2_IAA	0.89149565889146
tir1afb1.2_IAA	0.58071706403781
tir1afb1.2_IAA	0.857888663912828
tir1afb1.2_IAA	1.08880759134288
tir1afb1.2_IAA	0.362640633956842
tir1afb1.2_IAA	0.725232062942998
tir1afb1.2_IAA	0.751409107348025
tir1afb1.2_IAA	0.92234717551167
tir1afb1.2_IAA	0.824232463963511
tir1afb1.2_IAA	0.941143474313776
tir1afb1.2_IAA	1.05741482004512
tir1afb1.2_IAA	1.19169518504759
tir1afb1.2_IAA	0.52693603107786
tir1afb1.2_IAA	0.280074693145502
tir1afb1.2_IAA	0.63459650693913
tir1afb1.2_IAA	0.913441075817479
tir1afb1.2_IAA	0.417947021008063
tir1afb1.2_IAA	0.92603754831313
tir1afb1.2_IAA	0.907388864423085
tir1afb1.2_IAA	0.519456875533566
tir1afb1.2_IAA	0.892430553334497
tir1afb1.2_IAA	1.02922037184196
tir1afb1.2_IAA	1.09968188986451
tir1afb1.2_IAA	0.287012594012248
tir1afb1.2_IAA	0.795349146170746
tir1afb1.2_IAA	0.574615647672729
tir1afb1.2_IAA	0.72011474599164
tir1afb1.2_IAA	0.879145211249239
tir1afb1.2_IAA	0.821673805487831
tir1afb1.2_IAA	0.934845238065949
tir1afb1.2_IAA	0.414945517796209
tir1afb1.2_IAA	0.564725448564813
tir1afb1.2_IAA	0.466512327075282
tir1afb1.2_IAA	0.439301978285847
tir1afb1.2_IAA	0.543714926081832
tir1afb1.2_IAA	0.667514632328158
tir1afb1.2_IAA	0.613438369544092
tir1afb1.2_IAA	0.876881782597678
tir1afb1.2_IAA	0.804452065747681
tir1afb1.2_IAA	0.857544229118025
tir1afb1.2_IAA	0.554884454427586
tir1afb1.2_IAA	0.599611772781287
tir1afb1.2_IAA	0.80140135756514
tir1afb1.2_IAA	0.756575629270069
tir1afb1.2_IAA	0.414059828323857
tir1afb1.2_IAA	1.03128698061078
tir1afb1.3_IAA	1.49033439086427
tir1afb1.3_IAA	0.867961006255018
tir1afb1.3_IAA	0.954671553815603
tir1afb1.3_IAA	0.287005370132335
tir1afb1.3_IAA	0.935296300878386
tir1afb1.3_IAA	0.899514989609915
tir1afb1.3_IAA	0.743909062124525
tir1afb1.3_IAA	0.758906011151255
tir1afb1.3_IAA	0.789403162527758
tir1afb1.3_IAA	0.849894211957718
tir1afb1.3_IAA	0.566361289754391
tir1afb1.3_IAA	1.10373518810141
tir1afb1.3_IAA	1.14922928850464
tir1afb1.3_IAA	0.895690264354777
tir1afb1.3_IAA	0.766505136329228
tir1afb1.3_IAA	1.18526222643464
tir1afb1.3_IAA	0.945210391342365
tir1afb1.3_IAA	1.31409507713406
tir1afb1.3_IAA	0.437226487061146
tir1afb1.3_IAA	1.18893597569287
tir1afb1.3_IAA	1.18209173049946
tir1afb1.3_IAA	0.355347171401792
tir1afb1.3_IAA	0.598871454423071
tir1afb1.3_IAA	0.775714672140945
tir1afb1.3_IAA	0.747683462047361
tir1afb1.3_IAA	1.10348356143989
tir1afb1.3_IAA	0.67964361277173
tir1afb1.3_IAA	1.12995468623204
tir1afb1.3_IAA	1.13201802485652
tir1afb1.3_IAA	1.17902188522889
tir1afb1.3_IAA	0.551314015395357
tir1afb1.3_IAA	1.26563178212486
tir1afb1.3_IAA	1.27705563255797
tir1afb1.3_IAA	0.905000450831102
tir1afb1.3_IAA	0.550710111407704
tir1afb1.3_IAA	0.846270788031797
tir1afb1.3_IAA	0.540645044946812
tir1afb1.3_IAA	0.649398088056749
tir1afb1.3_IAA	0.439843404340979
tir1afb1.3_IAA	0.762177157751045
tir1afb1.3_IAA	0.923520173119143
tir1afb1.3_IAA	0.413020002222702
tir1afb1.3_IAA	1.14178113932359
tir1afb1.3_IAA	0.680146866094774
tir1afb1.3_IAA	0.642503517531039
tir1afb1.3_IAA	0.838571012189215
tir1afb1.3_IAA	0.96488759627341
tir1afb1.3_IAA	0.834997913595599
tir1afb1.3_IAA	0.705158556250091
tir1afb1.3_IAA	1.1340310381487
tir1afb1.3.5_IAA	0.867485202246629
tir1afb1.3.5_IAA	0.958652395042707
tir1afb1.3.5_IAA	1.15706504728183
tir1afb1.3.5_IAA	1.07313877598988
tir1afb1.3.5_IAA	0.782133552705834
tir1afb1.3.5_IAA	0.800264364031133
tir1afb1.3.5_IAA	0.732701435035914
tir1afb1.3.5_IAA	0.640222894250896
tir1afb1.3.5_IAA	0.595294971847324
tir1afb1.3.5_IAA	0.620495659286893
tir1afb1.3.5_IAA	0.761494075662569
tir1afb1.3.5_IAA	1.17753347893524
tir1afb1.3.5_IAA	0.661660583113516
tir1afb1.3.5_IAA	0.682870211456318
tir1afb1.3.5_IAA	0.828315807968388
tir1afb1.3.5_IAA	0.896676948782959
tir1afb1.3.5_IAA	0.926837952528505
tir1afb1.3.5_IAA	1.00015940964905
tir1afb1.3.5_IAA	0.762178257222013
tir1afb1.3.5_IAA	1.11373354851697
tir1afb1.3.5_IAA	0.365752058653441
tir1afb1.3.5_IAA	0.740455492709626
tir1afb1.3.5_IAA	0.627850611050928
tir1afb1.3.5_IAA	0.96110404563072
tir1afb1.3.5_IAA	0.770160375415542
tir1afb1.3.5_IAA	0.545520763397683
tir1afb1.3.5_IAA	0.645468286206643
tir1afb1.3.5_IAA	1.1035848553852
tir1afb1.3.5_IAA	0.607496209657432
tir1afb1.3.5_IAA	0.546946141646528
tir1afb1.3.5_IAA	0.792225230707652
tir1afb1.3.5_IAA	0.517811410240151
tir1afb1.3.5_IAA	0.509772276916668
tir1afb1.3.5_IAA	0.837780319540714
tir1afb1.3.5_IAA	0.78344490069477
tir1afb1.3.5_IAA	0.814632176779483
tir1afb1.3.5_IAA	0.972336026231614
tir1afb1.3.5_IAA	0.672151367025008
tir1afb1.3.5_IAA	0.825807142250422
tir1afb1.3.5_IAA	0.830938503946262
tir1afb1.3.5_IAA	0.632468836577183
tir1afb1.3.5_IAA	0.740797583489349
tir1afb1.3.5_IAA	0.697979220894067
tir1afb1.3.5_IAA	0.646893664455487
tir1afb1.3.5_IAA	0.888865875979293
tir1afb1.3.4_IAA	1.29885344435536
tir1afb1.3.4_IAA	1.18875386209451
tir1afb1.3.4_IAA	0.85029959070003
tir1afb1.3.4_IAA	0.48393274915491
tir1afb1.3.4_IAA	1.38310805425452
tir1afb1.3.4_IAA	0.622806400645129
tir1afb1.3.4_IAA	1.03098466414429
tir1afb1.3.4_IAA	0.560548733889381
tir1afb1.3.4_IAA	0.566119761265127
tir1afb1.3.4_IAA	0.830083078985986
tir1afb1.3.4_IAA	1.08106647725408
tir1afb1.3.4_IAA	1.01938314321748
tir1afb1.3.4_IAA	1.05780600212855
tir1afb1.3.4_IAA	1.40969965915111
tir1afb1.3.4_IAA	0.879245959745137
tir1afb1.3.4_IAA	1.70019714849665
tir1afb1.3.4_IAA	1.17743950752727
tir1afb1.3.4_IAA	0.961088372223862
tir1afb1.3.4_IAA	0.405249166631504
tir1afb1.3.4_IAA	0.807167203491943
tir1afb1.3.4_IAA	0.5637075638447
tir1afb1.3.4_IAA	0.897165140582584
tir1afb1.3.4_IAA	0.60230272257151
tir1afb1.3.4_IAA	1.41906128247324
tir1afb1.3.4_IAA	0.366251975001289
tir1afb1.3.4_IAA	0.916635019761733
tir1afb1.3.4_IAA	0.885678486199605
tir1afb1.3.4_IAA	1.04183955253621
tir1afb1.3.4_IAA	1.02489673732131
tir1afb1.3.4_IAA	1.25560619060345
tir1afb1.3.4_IAA	1.24940339723664
tir1afb1.3.4_IAA	1.37839852595749
tir1afb1.3.4_IAA	0.704074480404705
tir1afb1.3.4_IAA	1.37914515849239
tir1afb1.3.4_IAA	0.562386598590657
tir1afb1.3.4_IAA	0.573298920254487
tir1afb1.3.4_IAA	0.70413191367662
tir1afb1.3.4_IAA	0.29681514925618
tir1afb1.3.4_IAA	0.471814328780867
tir1afb1.3.4_IAA	1.07526571679067
tir1afb1.3.4_IAA	0.807167203491942
tir1afb1.3.4_IAA	1.07830968020216
tir1afb1.3.4_IAA	1.07629951568514
tir1afb1.3.4_IAA	0.940182661246841
tir1afb1.3.4_IAA	0.289233957363415
tir1afb1.3.4_IAA	0.711827972113216
tir1afb1.3.4_IAA	0.897854339845563
tir1afb1.3.4_IAA	0.381069759155332
tir1afb1.2.4.5_IAA	1.1879328767476
tir1afb1.2.4.5_IAA	1.33067599577744
tir1afb1.2.4.5_IAA	0.519674167718015
tir1afb1.2.4.5_IAA	1.02904619068462
tir1afb1.2.4.5_IAA	0.822472257267178
tir1afb1.2.4.5_IAA	0.994422487705657
tir1afb1.2.4.5_IAA	0.772342233322175
tir1afb1.2.4.5_IAA	0.93462756507634
tir1afb1.2.4.5_IAA	0.658593810345272
tir1afb1.2.4.5_IAA	0.699271350961661
tir1afb1.2.4.5_IAA	1.38824055717191
tir1afb1.2.4.5_IAA	1.06303264759649
tir1afb1.2.4.5_IAA	0.978703751383919
tir1afb1.2.4.5_IAA	1.16361131852004
tir1afb1.2.4.5_IAA	0.635440536574061
tir1afb1.2.4.5_IAA	0.888427225211772
tir1afb1.2.4.5_IAA	1.4036406704601
tir1afb1.2.4.5_IAA	1.83123278148253
tir1afb1.2.4.5_IAA	0.994741110739206
tir1afb1.2.4.5_IAA	0.340501815185767
tir1afb1.2.4.5_IAA	0.45191366924998
tir1afb1.2.4.5_IAA	0.555890985864723
tir1afb1.2.4.5_IAA	1.69454350009012
tir1afb1.2.4.5_IAA	1.21639653441129
tir1afb1.2.4.5_IAA	0.851573160997964
tir1afb1.2.4.5_IAA	0.749295167228816
tir1afb1.2.4.5_IAA	1.06844923916682
tir1afb1.2.4.5_IAA	1.66629225778213
tir1afb1.2.4.5_IAA	0.655088956976235
tir1afb1.2.4.5_IAA	0.602303741084992
tir1afb1.2.4.5_IAA	0.923157135868586
tir1afb1.2.4.5_IAA	1.03382553618785
tir1afb1.2.4.5_IAA	1.00143219444373
tir1afb1.2.4.5_IAA	1.7356458714179
tir1afb1.2.4.5_IAA	1.02033716110095
tir1afb1.2.4.5_IAA	1.69847318417055
tir1afb1.2.4.5_IAA	0.792734107469297
tir1afb1.2.4.5_IAA	1.58472476119365
tir1afb1.3.4.5_IAA	1.01321404549105
tir1afb1.3.4.5_IAA	1.47857835407073
tir1afb1.3.4.5_IAA	1.15354747855586
tir1afb1.3.4.5_IAA	0.961358927579201
tir1afb1.3.4.5_IAA	0.968850036105794
tir1afb1.3.4.5_IAA	0.868302712771102
tir1afb1.3.4.5_IAA	0.981168747905075
tir1afb1.3.4.5_IAA	1.07314291370378
tir1afb1.3.4.5_IAA	0.866055380213125
tir1afb1.3.4.5_IAA	0.891441914664351
tir1afb1.3.4.5_IAA	0.796887478150932
tir1afb1.3.4.5_IAA	1.18559277614183
tir1afb1.3.4.5_IAA	0.896852159711334
tir1afb1.3.4.5_IAA	1.17893401300708
tir1afb1.3.4.5_IAA	0.872214736112767
tir1afb1.3.4.5_IAA	1.66236021658977
tir1afb1.3.4.5_IAA	0.869384761780498
tir1afb1.3.4.5_IAA	1.03468855660061
tir1afb1.3.4.5_IAA	1.16536678312003
tir1afb1.3.4.5_IAA	0.957946311472644
tir1afb1.3.4.5_IAA	0.597041349569318
tir1afb1.3.4.5_IAA	1.3075313760469
tir1afb1.3.4.5_IAA	1.12133571189152
tir1afb1.3.4.5_IAA	1.02969448424955
tir1afb1.3.4.5_IAA	1.10785171654365
tir1afb1.3.4.5_IAA	0.983832253158975
tir1afb1.3.4.5_IAA	0.79913481070891
tir1afb1.3.4.5_IAA	1.13731674341491
tir1afb1.3.4.5_IAA	0.858980444382456
tir1afb1.3.4.5_IAA	1.16187093247429
tir1afb1.3.4.5_IAA	0.437147799796187
tir1afb1.3.4.5_IAA	0.964188901911469
tir1afb1.3.4.5_IAA	1.05316662429954
tir1afb1.3.4.5_IAA	1.03244122404263
tir1afb1.3.4.5_IAA	0.702832448872623
tir1afb1.3.4.5_IAA	0.473854231576487
tir1afb1.3.4.5_IAA	0.544686824422362
tir1afb1.3.4.5_IAA	1.33549818121284
tir1afb1.3.4.5_IAA	1.4298029141087
tir1afb1.3.4.5_IAA	1.25442774004729
tir1afb1.3.4.5_IAA	1.35922002488038
tir1afb1.3.4.5_IAA	0.577980640096102
tir1afb1.3.4.5_IAA	1.30894636321303
tir1afb1.3.4.5_IAA	0.477183613143858
tir1afb1.3.4.5_IAA	1.15662715650568
tir1afb1.3.4.5_IAA	0.966269765391079
tir1afb1.3.4.5_IAA	0.886780780470028
tir1afb1.3.4.5_IAA	1.05383250061301
afb1.2.3.4.5_IAA	0.916462407396956
afb1.2.3.4.5_IAA	0.857077488365993
afb1.2.3.4.5_IAA	1.33779424393056
afb1.2.3.4.5_IAA	0.895386206360076
afb1.2.3.4.5_IAA	1.39359172448717
afb1.2.3.4.5_IAA	0.748621535917855
afb1.2.3.4.5_IAA	1.43177231967859
afb1.2.3.4.5_IAA	1.43151607407328
afb1.2.3.4.5_IAA	0.913579644337202
afb1.2.3.4.5_IAA	1.30339327141748
afb1.2.3.4.5_IAA	0.969249002091146
afb1.2.3.4.5_IAA	0.971491151137624
afb1.2.3.4.5_IAA	1.19641073119989
afb1.2.3.4.5_IAA	0.674118126173505
afb1.2.3.4.5_IAA	1.2402927911095
afb1.2.3.4.5_IAA	0.810376726797951
afb1.2.3.4.5_IAA	1.30236828899623
afb1.2.3.4.5_IAA	0.765341561664437
afb1.2.3.4.5_IAA	0.60743020739116
afb1.2.3.4.5_IAA	0.705444151422848
afb1.2.3.4.5_IAA	1.10826224297269
afb1.2.3.4.5_IAA	0.953041467555188
afb1.2.3.4.5_IAA	0.573029234878078
afb1.2.3.4.5_IAA	0.247597316132339
afb1.2.3.4.5_IAA	1.03170886838585
afb1.2.3.4.5_IAA	0.545482832307079
afb1.2.3.4.5_IAA	1.05739749031834
afb1.2.3.4.5_IAA	1.14291946109109
afb1.2.3.4.5_IAA	1.04368835043417
afb1.2.3.4.5_IAA	0.994425132813012
afb1.2.3.4.5_IAA	0.871491303664769
afb1.2.3.4.5_IAA	0.653490354945922
afb1.2.3.4.5_IAA	0.8986533378278
afb1.2.3.4.5_IAA	0.891222215273763
afb1.2.3.4.5_IAA	0.706469133844095
afb1.2.3.4.5_IAA	0.725495370038483
afb1.2.3.4.5_IAA	0.695130265809057
afb1.2.3.4.5_IAA	0.983662817389924
afb1.2.3.4.5_IAA	1.09673119073367
afb1.2.3.4.5_IAA	0.577449471569702
afb1.2.3.4.5_IAA	1.14990215383583
afb1.2.3.4.5_IAA	0.997051650267456
afb1.2.3.4.5_IAA	0.902689206111458
afb1.2.3.4.5_IAA	0.55368269167705
afb1.2.3.4.5_IAA	0.583214997689214
afb1comp_IAA	0.724503235832785
afb1comp_IAA	0.547686971984284
afb1comp_IAA	0.633065930896646
afb1comp_IAA	0.902880929068857
afb1comp_IAA	0.259884307267259
afb1comp_IAA	0.522704101783153
afb1comp_IAA	0.727438723081416
afb1comp_IAA	0.648617767596849
afb1comp_IAA	0.700457223264196
afb1comp_IAA	1.08706713962669
afb1comp_IAA	0.466680015357118
afb1comp_IAA	0.350821954799374
afb1comp_IAA	0.328524743144864
afb1comp_IAA	0.536881880622294
afb1comp_IAA	0.385735515905453
afb1comp_IAA	0.412966844424687
afb1comp_IAA	0.614266321070296
afb1comp_IAA	0.343951665494064
afb1comp_IAA	0.561240179068397
afb1comp_IAA	0.426082851280281
afb1comp_IAA	0.130410582449901
afb1comp_IAA	0.299607070887058
afb1comp_IAA	0.438824115082857
afb1comp_IAA	0.484168024497908
afb1comp_IAA	0.293548724863282
afb1comp_IAA	0.430517310740981
afb1comp_IAA	0.393605120018811
afb1comp_IAA	0.377678540265589
afb1comp_IAA	0.303167129890719
afb1comp_IAA	0.801637847578775
afb1comp_IAA	0.612704891682725
afb1comp_IAA	0.453876294379039
afb1comp_IAA	0.447130919424733
afb1comp_IAA	0.47823459282514
afb1comp_IAA	0.540067196572939
afb1comp_IAA	0.574855843328012
afb1comp_IAA	0.360128073949296
afb1comp_IAA	0.382175456901793
afb1comp_IAA	0.241584354844933
afb1comp_IAA	0.35425709945203
afb1comp_IAA	0.328337371618359
afb1comp_IAA	0.405034783135827
afb1comp_IAA	0.376616768282042
afb1comp_IAA	0.306914560420889
afb1comp_IAA	0.448130234232778
afb1comp_IAA	0.442946288666045
afb1comp_IAA	0.754045479845621
afb1comp_IAA	0.28749037883951
afb1comp_IAA	0.434889313026178
afb1comp_IAA	0.516083641179852
afb1comp_IAA	0.480108308090225
afb1comp_IAA	0.254450532998515
afb1comp_IAA	0.436575656764755
afb1comp_IAA	0.695710477925982
afb1comp_IAA	0.663170289489007
tir1_IAA	0.504398054944713
tir1_IAA	0.364883699321707
tir1_IAA	0.72635271161768
tir1_IAA	0.764889893765292
tir1_IAA	0.422933378759253
tir1_IAA	0.824681760460867
tir1_IAA	0.757363644810606
tir1_IAA	0.724749899340291
tir1_IAA	0.779036454300491
tir1_IAA	0.672623656580047
tir1_IAA	0.923498621736302
tir1_IAA	0.396382444946884
tir1_IAA	0.621124601232694
tir1_IAA	0.592483042710689
tir1_IAA	0.735551460340076
tir1_IAA	0.639243348716203
tir1_IAA	0.697502090624711
tir1_IAA	0.56732585870474
tir1_IAA	0.555478985350142
tir1_IAA	0.302861832935858
tir1_IAA	0.803148325951622
tir1_IAA	0.778060829435997
tir1_IAA	0.483631182829002
tir1_IAA	0.264742775730171
tir1_IAA	0.402375569114504
tir1_IAA	0.724192399417723
tir1_IAA	0.714645213243721
tir1_IAA	0.62328491343265
tir1_IAA	0.631647412271194
tir1_IAA	0.615967726948927
tir1_IAA	0.618267414129526
tir1_IAA	0.314569331309815
tir1_IAA	0.330806516554649
tir1_IAA	0.347810264193019
tir1_IAA	0.282025273329824
tir1_IAA	0.332897141264285
tir1_IAA	0.352688388515501
tir1_IAA	0.122301545513675
tir1_IAA	0.304046520271318
tir1_IAA	0.214289032737634
tir1_IAA	0.484885557654785
tir1_IAA	0.360354012450832
tir1_IAA	0.52711617678942
tir1_IAA	0.363908074457212
tir1_IAA	0.143904667513241
tir1_IAA	0.772137392758695
tir1_IAA	0.168574039086938
tir1_IAA	0.262164338588288
tir1_IAA	0.128503732152259
tir1_IAA	0.346904326818844
tir1_IAA	0.453804936971538
afb2.3_IAA	0.874812882018135
afb2.3_IAA	0.543382318353749
afb2.3_IAA	0.645318384186075
afb2.3_IAA	0.838731277825584
afb2.3_IAA	0.914491578653193
afb2.3_IAA	0.550244463936381
afb2.3_IAA	0.651571791047667
afb2.3_IAA	0.642330030464606
afb2.3_IAA	0.575700810452597
afb2.3_IAA	0.496454096949943
afb2.3_IAA	0.550687183006229
afb2.3_IAA	0.670940750353484
afb2.3_IAA	0.398004443792664
afb2.3_IAA	0.441778291823809
afb2.3_IAA	0.328718909361571
afb2.3_IAA	0.558877485798402
afb2.3_IAA	0.345984953085614
afb2.3_IAA	0.387545205767522
afb2.3_IAA	0.437406441009068
afb2.3_IAA	0.518313351023649
afb4.5_IAA	0.413379093711825
afb4.5_IAA	0.299040195451107
afb4.5_IAA	0.254835246772888
afb4.5_IAA	0.103316217259561
afb4.5_IAA	0.0677923437739624
afb4.5_IAA	0.178875838837448
afb4.5_IAA	0.354382049804072
afb4.5_IAA	0.0849260448120323
afb4.5_IAA	0.230219829614861
afb4.5_IAA	0.169338078592921
afb4.5_IAA	0.340846425983997
afb4.5_IAA	0.166539574090036
afb4.5_IAA	0.555360362980629
afb4.5_IAA	0.327939037868651
afb4.5_IAA	0.391333731709508
afb4.5_IAA	0.389106350574561
afb4.5_IAA	0.376370299469596
afb4.5_IAA	0.399557908207782
afb4.5_IAA	0.276252373070476
afb4.5_IAA	0.474260844733766
afb4.5_IAA	0.529374249739556
afb4.5_IAA	1.10004071898086
afb4.5_IAA	0.514239480489262
afb4.5_IAA	0.0761307449458219
afb4.5_IAA	0.568953099137499
afb4.5_IAA	0.251522731238861
afb4.5_IAA	0.421603270210099
afb4.5_IAA	0.486597109481177
afb4.5_IAA	0.579404656770719
afb4.5_IAA	0.47671667521589
afb4.5_IAA	0.724298655215997
afb4.5_IAA	0.55987223758732
afb4.5_IAA	0.68591916489072
afb4.5_IAA	0.66558717299221
afb4.5_IAA	0.797059772290998
afb4.5_IAA	0.490709197730313
afb4.5_IAA	0.278765315889392
afb4.5_IAA	0.681007503926474
afb4.5_IAA	0.224679932945886
afb4.5_IAA	0.173564391515644
afb4.5_IAA	0.525947509531944
afb4.5_IAA	0.433882422620717
afb4.5_IAA	0.523434566713027
afb4.5_IAA	0.392190416761414
afb4.5_IAA	0.142323943289565
afb4.5_IAA	0.521435634925252
afb4.5_IAA	0.674039798837658
afb4.5_IAA	0.640686194150216
afb4.5_IAA	0.413321981375032
afb4.5_IAA	0.278365529531836
afb4.5_IAA	0.15328951195393
afb4.5_IAA	0.448274731492693
afb4.5_IAA	0.42017546179026
afb4.5_IAA	0.370544841116651
afb4.5_IAA	0.345301188253896
afb4.5_IAA	0.26334498495513
afb4.5_IAA	0.164140855944706
afb4.5_IAA	0.369973717748715
afb4.5_IAA	0.390762608341574
tir1afb2_IAA	0.875636207654408
tir1afb2_IAA	0.625513355794306
tir1afb2_IAA	0.639418890079109
tir1afb2_IAA	0.585151953315115
tir1afb2_IAA	0.643130960672085
tir1afb2_IAA	0.688265025342247
tir1afb2_IAA	0.973917695735125
tir1afb2_IAA	0.699165550099401
tir1afb2_IAA	0.930963736016395
tir1afb2_IAA	1.15675190287809
tir1afb2_IAA	0.251006678191763
tir1afb2_IAA	0.537719940182635
tir1afb2_IAA	0.532122373415447
tir1afb2_IAA	0.317823948865343
tir1afb2_IAA	0.411332774755092
tir1afb2_IAA	0.11147996130019
tir1afb2_IAA	0.284474235283997
tir1afb2_IAA	0.437965408215813
tir1afb2_IAA	0.0512030054809013
tir1afb2_IAA	-0.0287538166567081
tir1afb2_IAA	0.432308919693182
tir1afb2_IAA	0.513208489917898
tir1afb2_IAA	0.119434398285141
tir1afb2_IAA	0.741530292263691
tir1afb2_IAA	0.44267914865134
tir1afb2_IAA	0.319709445039555
tir1afb2_IAA	0.575253098400511
tir1afb2_IAA	0.439438452101915
tir1afb2_IAA	0.403790790058251
tir1afb2_IAA	0.2376903614614
tir1afb2_IAA	0.28901121045319
tir1afb2_IAA	0.19921445515642
tir1afb2_IAA	0.270333013977417
tir1afb2_IAA	0.307748328684407
tir1afb2_IAA	0.296494273394589
tir1afb2_IAA	0.308514311505181
tir1afb2_IAA	0.297437021481694
tir1afb2_IAA	0.22696660197058
tir1afb2_IAA	0.297083490949029
tir1afb2_IAA	0.341981868597415
tir1afb2_IAA	0.276166267766384
tir1afb2_IAA	0.207522422674034
tir1afb2_IAA	0.237572517950513
tir1afb2_IAA	0.292251907002614
tir1afb2_IAA	0.274104006325838
tir1afb2_IAA	1.06165218959135
tir1afb2_IAA	1.02836139776545
tir1afb2_IAA	0.647844701107611
tir1afb2_IAA	0.548620464939788
tir1afb3_IAA	0.789017397564285
tir1afb3_IAA	0.81782521599112
tir1afb3_IAA	0.800282369332008
tir1afb3_IAA	0.394802057421928
tir1afb3_IAA	1.04987190006063
tir1afb3_IAA	0.913460132560853
tir1afb3_IAA	1.16480981512818
tir1afb3_IAA	1.09041406407884
tir1afb3_IAA	0.692913107170896
tir1afb3_IAA	0.925722523703844
tir1afb3_IAA	0.516487221204522
tir1afb3_IAA	1.46098469785457
tir1afb3_IAA	0.824865823345946
tir1afb3_IAA	0.520535570433547
tir1afb3_IAA	0.580204717765706
tir1afb3_IAA	0.647207831092477
tir1afb3_IAA	1.00017694648114
tir1afb3_IAA	0.661113030618259
tir1afb3_IAA	0.85461238942009
tir1afb3_IAA	0.913225445649027
tir1afb3_IAA	0.809259143709413
tir1afb3_IAA	0.640225895465606
tir1afb3_IAA	0.87368070100608
tir1afb3_IAA	1.19531911366576
tir1afb3_IAA	0.892279638768416
tir1afb3_IAA	0.550810182059303
tir1afb3_IAA	0.487210028954032
tir1afb3_IAA	0.458519553983112
tir1afb3_IAA	0.187749529462055
tir1afb3_IAA	0.178538068172822
tir1afb3_IAA	0.418857465884252
tir1afb3_IAA	0.372272113886481
tir1afb3_IAA	0.350856933182215
tir1afb3_IAA	0.263846760622143
tir1afb3_IAA	0.226766228553388
tir1afb3_IAA	0.579794015670008
tir1afb3_IAA	0.504576860429271
tir1afb3_IAA	0.526461414957194
tir1afb3_IAA	0.261617234959782
tir1afb3_IAA	0.660115611242994
tir1afb3_IAA	0.322107786483337
tir1afb3_IAA	0.263142699886661
tir1afb3_IAA	0.28279772875222
tir1afb3_IAA	0.714797661698816
tir1afb3_IAA	0.550986197243173
tir1afb3_IAA	0.727998800489118
tir1afb3_IAA	0.422964486841235
tir1afb3_IAA	0.479993406415334
tir1afb3_IAA	0.239791352159819
tir1afb3_IAA	0.235449644291009
tir1afb3_IAA	0.227176930649086
tir1afb3_IAA	0.303332833537133
tir1afb3_IAA	0.231459966789939
tir1afb3_IAA	0.417566687869201
tir1afb3_IAA	0.504166158333572
tir1afb3_IAA	0.324689342513443
tir1afb3_IAA	0.503638112781961
tir1afb3_IAA	0.109481444367562
tir1afb3_IAA	0.132187403086878
tir1afb3_IAA	0.179946189643789
tir1afb3_IAA	0.239087291424336
tir1afb3_IAA	0.115583304075078
tir1afb3_IAA	0.177247290157771
tir1afb3_IAA	0.242490251645835
tir1afb3_IAA	0.228643723848009
tir1afb3_IAA	0.443440919898191
tir1afb2.3_IAA	0.955996658855193
tir1afb2.3_IAA	0.397108981646905
tir1afb2.3_IAA	0.690503259936426
tir1afb2.3_IAA	0.57739158681176
tir1afb2.3_IAA	0.527912480567995
tir1afb2.3_IAA	0.897062576857931
tir1afb2.3_IAA	1.14480614399406
tir1afb2.3_IAA	0.435508944523075
tir1afb2.3_IAA	0.418049142671523
tir1afb2.3_IAA	0.763358778625955
tir1afb2.3_IAA	0.301863152277316
tir1afb2.3_IAA	1.15234692220237
tir1afb2.3_IAA	0.286433559943385
tir1afb2.3_IAA	0.367351910717187
tir1afb2.3_IAA	0.686036798997656
tir1afb2.3_IAA	0.106615002668274
tir1afb2.3_IAA	0.749843383837213
tir1afb2.3_IAA	0.403315622172207
tir1afb2.3_IAA	1.02003526763962
tir1afb2.3_IAA	1.0127845193624
tir1afb2.3_IAA	0.82298893245783
tir1afb2.3_IAA	0.885171349683288
tir1afb2.3_IAA	0.863825146755146
tir1afb2.3_IAA	0.312014199865425
tir1afb2.3_IAA	0.645258590686558
tir1afb2.3_IAA	0.531566857699715
tir1afb2.3_IAA	0.641894243485928
tir1afb2.3_IAA	0.417469082809345
tir1afb2.3_IAA	0.314508457272791
tir1afb2.3_IAA	0.990800250585859
tir1afb2.3_IAA	0.71387967238219
tir1afb2.3_IAA	0.650479129446159
tir1afb2.3_IAA	0.251049908350542
tir1afb2.3_IAA	0.405983897538226
tir1afb2.3_IAA	0.861040859416692
tir1afb2.3_IAA	0.220306735655121
tir1afb2.3_IAA	0.375124712870367
tir1afb2.3_IAA	0.240434812872689
tir1afb2.3_IAA	0.497575349776096
tir1afb2.3_IAA	0.165897120582844
tir1afb2.3_IAA	0.225469268428502
tir1afb2.3_IAA	0.346817791596093
tir1afb2.3_IAA	0.611499106707811
tir1afb2.3_IAA	0.635455579015753
tir1afb2.3_IAA	0.488526415926124
tir1afb2.3_IAA	0.349660084920763
tir1afb2.3_IAA	0.259112740434813
tir1afb3.4.5_IAA_RESP	1.23628945297701
tir1afb3.4.5_IAA_RESP	1.00687203100866
tir1afb3.4.5_IAA_RESP	1.02137382333226
tir1afb3.4.5_IAA_RESP	1.35608078570804
tir1afb3.4.5_IAA_RESP	0.740104333634483
tir1afb3.4.5_IAA_RESP	0.93506251275027
tir1afb3.4.5_IAA_RESP	1.39072654678985
tir1afb3.4.5_IAA_RESP	1.04221723545012
tir1afb3.4.5_IAA_RESP	0.905872409873809
tir1afb3.4.5_IAA_RESP	1.2634278553318
tir1afb3.4.5_IAA_RESP	0.790744032873839
tir1afb3.4.5_IAA_RESP	0.669460554308863
tir1afb3.4.5_IAA_RESP	1.29858654154402
tir1afb3.4.5_IAA_RESP	1.23568326873197
tir1afb3.4.5_IAA_RESP	1.03498965406697
tir1afb3.4.5_IAA_RESP	1.03955935068341
tir1afb3.4.5_IAA_RESP	1.24650132602804
tir1afb3.4.5_IAA_RESP	1.03429021070731
tir1afb3.4.5_IAA_RESP	1.27466557864366
tir1afb3.4.5_IAA_RESP	0.700329321248507
tir1afb3.4.5_IAA_RESP	0.539037682511002
tir1afb3.4.5_IAA_RESP	0.686526972284557
tir1afb3.4.5_IAA_RESP	0.448110045755252
tir1afb3.4.5_IAA_RESP	0.671558884387842
tir1afb3.4.5_IAA_RESP	0.837933144872207
tir1afb3.4.5_IAA_RESP	0.9430827966077
tir1afb3.4.5_IAA_RESP	0.77050680500102
tir1afb3.4.5_IAA_RESP	0.705924868125783
tir1afb3.4.5_IAA_RESP	0.724669950164661
tir1afb3.4.5_IAA_RESP	1.20271617171335
tir1afb3.4.5_IAA_RESP	0.574662664296331
tir1afb3.4.5_IAA_RESP	0.569207006090986
tir1afb3.4.5_IAA_RESP	0.572704222889285
tir1afb3.4.5_IAA_RESP	1.04855885524437
tir1afb3.4.5_IAA_RESP	0.582076763908723
tir1afb3.4.5_IAA_RESP	0.636353568618308
tir1afb3.4.5_IAA_RESP	0.431836330253839
tir1afb3.4.5_IAA_RESP	0.692635444292251
tir1afb3.4.5_IAA_RESP	0.537732054906304
tir1afb3.4.5_IAA_RESP	0.79820476204354
tir1afb3.4.5_IAA_RESP	0.748451024393087
tir1afb3.4.5_IAA_RESP	0.531483694226678
tir1afb3.4.5_IAA_RESP	0.670999329700114
tir1afb3.4.5_IAA_RESP	0.582636318596451
tir1afb3.4.5_IAA_RESP	0.498469967650744
tir1afb3.4.5_IAA_RESP	0.840171363623117
tir1afb3.4.5_IAA_RESP	0.813825663742605
tir1afb3.4.5_IAA_RESP	0.51269198263049
tir1afb3.4.5_IAA_RESP	0.434167808119372
