# Supplementary material for: Genetic analysis of the Arabidopsis TIR1/AFB auxin receptors reveals both overlapping and specialized functions
Source: eLife. 2020 Feb 18;9:e54740. doi: 10.7554/eLife.54740 (PMC7048394; doi:10.7554/eLife.54740)
Supplement: Figure 7—figure supplement 1—source data 1. [file elife-54740-fig7-figsupp1-data1.xlsx]

## Sheet: Figure 7—figure supplement 1
Average Angles																			Average Change from original angle
Col-0	0	30	60	90	120	150	180	210	240	270	300	330	360	390	420	450	480		Col-0	0	30	60	90	120	150	180	210	240	270	300	330	360	390	420	450	480				30	60	90	120	150	180	210	240	270	300
mean ∠ from hori	2.18061	5.68898	14.4259	28.8547	40.823	54.2756	64.8307	70.6624	72.961	73.8677	73.4857	77.0506	76.7996	79.8106	79.6642	80.432	80.8699		mean ∆ ∠ from hori	0	3.50837	12.2453	26.6741	38.6424	52.095	62.6501	68.4818	70.7804	71.6871	71.3051	74.8699	74.619	77.63	77.4836	78.2514	78.6893		Col-0	afb1-3	0.465528	0.0453687	0.00931653	0.0380226	0.0459057	0.0700423	0.120482	0.736947	0.709832	0.106595
STDEV	6.99946	7.60359	10.3641	11.5563	12.604	13.7473	11.197	12.0009	8.90896	10.2024	8.83743	7.83918	7.2522	5.78453	5.64226	4.88633	5.97633		STDEV	0	4.4425	7.21196	8.30676	8.93916	10.4453	8.59888	9.27783	6.69049	8.27114	6.55277	6.36329	6.80436	6.19345	7.33533	7.5185	7.46875		Col-0	tir1-1	0.0329941	0.038876	0.0130955	0.00188729	0.00025628	0.000157115	0.0709952	0.226248	0.608934	0.838401
n	33	33	33	33	33	33	33	33	33	33	33	33	33	33	33	33	33		n	33	33	33	33	33	33	33	33	33	33	33	33	33	33	33	33	33		Col-0	tir1-1 afb1-3	0.00192137	1.49925e-05	4.55274e-10	7.37909e-09	5.8322e-08	1.23485e-06	0.00740913	0.092196	0.993748	0.17392
SE	1.21845	1.32361	1.80415	2.01169	2.19408	2.3931	1.94915	2.08909	1.55085	1.776	1.5384	1.36463	1.26245	1.00696	0.982191	0.850601	1.04035		SE	0	0.77334	1.25544	1.44602	1.55611	1.8183	1.49687	1.61506	1.16467	1.43982	1.14069	1.10771	1.18449	1.07814	1.27692	1.3088	1.30014		Col-0	tir1afb345	0.232087	0.381493	0.000429363	3.98704e-06	4.86259e-06	2.62648e-09	4.93304e-07	3.68211e-11	2.57117e-09	2.5037e-10
raw-1	-16.3895	-10.9541	-16.3895	-26.565	-43.4518	-48.8141	-63.435	-72.646	-75.9638	-76.7595	-76.373	-80.5377	-81.2538	-78.1113	-79.3803	-82.875	-83.0888																					Col-0	tir1afb1345	0.00680612	2.21945e-06	8.81178e-13	7.76111e-14	5.91589e-15	1.17882e-15	5.68717e-13	7.83165e-11	3.5432e-08	2.29463e-06
2	-9.46232	-21.8014	-26.565	-37.6942	-58.2405	-64.9831	-77.4712	-81.0274	-80.1342	-79.3803	-79.1145	-85.0303	-81.8699	-82.875	-79.6951	-83.1572	-79.5085																					Col-0	afb1-3 AFB1-mCitrine#5	0.248695	0.372061	8.31073e-05	1.21883e-06	0.0374145	0.00726407	0.0786082	0.661791	0.489964	0.751412
3	-5.80673	-14.0362	-39.2894	-45	-62.1027	-69.7751	-80.1342	-83.6598	-84.2894	-81.2538	-79.8753	-85.4261	-82.875	-84.5597	-86.8202	-87.5105	-87.9546																					Col-0	afb1-3 AFB1-mCitrine#7	0.9625	0.457263	0.614467	0.456559	0.000489297	9.40597e-06	2.79404e-07	5.92414e-16	4.24246e-11	3.02807e-12
4	4.89909	0	0	-23.1986	-33.6901	-41.1859	-61.6992	-64.9831	-71.565	-78.6901	-70.0169	-74.7449	-81.2538	-79.992	-83.991	-84.8056	-83.4181																					afb1-3	tir1-1	0.285938	0.991159	0.644879	0.437647	0.341448	0.324238	0.985915	0.626997	0.422615	0.195214
5	0	-4.23639	-6.34019	-20.556	-42.5104	-49.7636	-68.1986	-78.1113	-79.2157	-80.5377	-80.5377	-83.991	-86.4237	-87.6141	-86.4237	-87.7974	-85.7636																					afb1-3	tir1-1 afb1-3	0.0626716	0.0219196	0.00320814	0.00149389	0.00710292	0.0239022	0.466974	0.330443	0.733503	0.805693
6	-6.34019	-14.0362	-36.0274	-50.1944	-59.9314	-68.1986	-78.6901	-81.4692	-82.5041	-85.2364	-84.0939	-87.3974	-90	-93.0128	-90	-87.3974	-92.2026																					afb1-3	tir1afb345	0.855636	0.239028	0.863938	0.121446	0.118954	0.00947291	0.0212198	1.31896e-05	1.34815e-07	2.33358e-09
7	-4.57392	-2.72631	-21.0375	-31.6075	-42.7094	-58.3925	-64.9831	-63.435	-70.821	-69.444	-74.0546	-72.8973	-77.0054	-75.9638	-78.6901	-75.9638	-79.0459																					afb1-3	tir1afb1345	0.162797	0.00744304	0.000269644	1.64235e-05	2.70135e-06	5.1205e-06	4.48642e-06	3.21803e-07	2.13768e-07	2.15277e-07
8	-8.61565	-16.3895	-23.1986	-36.8699	-49.7636	-69.7751	-75.0686	-77.4712	-84.9575	-90	-84.8056	-90	-90	-90	-90	-90	-92.3859																					afb1-3	afb1-3 AFB1-mCitrine#5	0.0893193	0.00293186	3.8849e-07	2.26766e-07	0.000602425	0.00095972	0.007728	0.543573	0.915296	0.132571
9	-18.435	-17.354	-35.5377	-53.1301	-57.2648	-79.8753	-84.8056	-86.6335	-90	-90	-91.3972	-92.1211	-87.5105	-92.6026	-90	-90	-90																					afb1-3	afb1-3 AFB1-mCitrine#7	0.407209	0.00627733	0.00295414	0.00782915	0.705902	0.342339	0.0471141	4.15848e-07	4.10838e-09	2.72138e-11
10	0	-6.34019	-14.6209	-21.8014	-29.4759	-54.1624	-65.2249	-66.1941	-67.3801	-73.0725	-69.1455	-72.646	-71.565	-81.573	-82.875	-76.6075	-77.9052																					tir1-1	tir1-1 afb1-3	0.323799	0.0178146	9.21054e-05	0.0086407	0.0214913	0.0820271	0.400737	0.488339	0.633643	0.292093
11	6.58194	3.36646	-5.19443	-14.0362	-24.2278	-39.8056	-65.7722	-66.0375	-74.7449	-78.6901	-75.4655	-81.0274	-79.6951	-79.2157	-80.5377	-81.0274	-78.6901																					tir1-1	tir1afb345	0.222942	0.22319	0.44069	0.472829	0.446143	0.0242704	0.00644606	2.62179e-08	4.77739e-08	8.6146e-09
12	-1.68468	-6.34019	-14.5345	-34.992	-50.1944	-65.7722	-74.0546	-72.3499	-73.8108	-72.2553	-68.1986	-72.7585	-74.9315	-77.7352	-79.2157	-83.2902	-79.8753																					tir1-1	tir1afb1345	0.761592	0.00517511	1.21331e-06	5.55017e-05	1.44915e-07	2.78441e-07	8.46942e-08	5.12085e-09	3.19319e-07	4.73049e-06
13	0	-4.23639	-10.3049	-29.0546	-35.5377	-49.7636	-67.1663	-71.565	-59.3003	-57.0948	-50.5275	-67.8337	-64.5366	-75.0686	-76.6075	-74.7449	-74.876																					tir1-1	afb1-3 AFB1-mCitrine#5	0.00061963	0.00189877	5.86246e-09	8.44434e-11	1.83498e-08	4.10944e-09	0.00117903	0.0810366	0.198705	0.972896
14	1.50744	0	-8.74616	-30.9638	-38.6598	-56.3099	-72.2553	-78.1113	-81.2538	-81.0274	-74.9315	-79.5085	-75.9638	-78.1113	-79.992	-75.0686	-77.7995																					tir1-1	afb1-3 AFB1-mCitrine#7	0.0139353	0.00463506	0.00332761	0.000153932	0.347082	0.844294	0.0150894	2.35936e-12	7.21792e-10	6.13841e-11
15	-5.04245	-8.74616	-17.354	-29.3577	-47.1211	-61.3895	-76.5043	-76.6075	-79.992	-80.9097	-75.9638	-79.8753	-82.875	-84.5597	-86.9872	-86.8202	-90																					tir1-1 afb1-3	tir1afb345	0.0185268	0.000336607	0.000273045	0.0142461	0.0757144	0.861703	0.0753467	3.2097e-05	2.64997e-08	5.04862e-10
16	0	-15.5241	-23.6294	-41.4237	-49.7636	-71.565	-69.444	-77.4712	-70.2011	-75.9638	-68.1986	-79.6951	-73.7398	-77.4712	-71.565	-78.1113	-80.5377																					tir1-1 afb1-3	tir1afb1345	0.396136	0.708795	0.357459	0.178719	0.00301865	0.0021855	4.38756e-06	8.12683e-07	1.31909e-07	2.73617e-07
17	2.2026	2.72631	-11.8887	-30.2564	-36.2538	-54.4623	-65.3231	-75.9638	-71.565	-72.2553	-70.0169	-72.1213	-71.565	-74.3577	-70.3462	-78.2317	-79.2157																					tir1-1 afb1-3	afb1-3 AFB1-mCitrine#5	7.34318e-06	1.83038e-08	4.22394e-20	6.22035e-18	1.33434e-12	1.60466e-10	5.01198e-05	0.0364371	0.5561	0.218195
18	-2.04541	-3.01279	-17.6501	-31.7595	-48.3665	-60.2551	-65.2249	-81.0274	-79.2157	-82.875	-79.1145	-83.4181	-82.2348	-81.4692	-77.4712	-78.1113	-85.0303																					tir1-1 afb1-3	afb1-3 AFB1-mCitrine#7	0.000326929	2.43961e-07	2.01577e-11	8.78541e-11	0.00050602	0.0323621	0.17087	1.29714e-07	4.47984e-10	4.12203e-12
19	-5.44033	-6.70984	-10.7843	-25.0169	-37.5686	-34.5923	-53.1301	-57.7244	-68.7495	-70.3462	-72.3499	-80.8376	-82.1467	-87.5105	-77.7352	-81.573	-81.1193																					tir1afb345	tir1afb1345	0.0683478	5.58675e-05	1.35146e-06	1.01659e-05	3.72378e-07	0.000566975	0.000326997	0.0648593	0.569308	0.986813
20	0	-4.57392	-8.97263	-18.435	-32.0054	-38.6598	-54.4623	-61.6992	-66.8014	-63.435	-67.0679	-72.3499	-70.0169	-75.9638	-77.4712	-79.6951	-72.1213																					tir1afb345	afb1-3 AFB1-mCitrine#5	0.00864643	0.0654096	2.7545e-13	7.11036e-18	1.39619e-11	1.68786e-15	1.37855e-11	3.04997e-13	2.07075e-13	2.08365e-12
21	-12.5288	-14.7436	-26.565	-48.8141	-63.435	-72.4744	-69.7751	-73.3008	-74.4759	-75.0686	-73.4956	-75.1735	-72.7585	-82.0928	-75.9638	-77.4712	-72.2553																					tir1afb345	afb1-3 AFB1-mCitrine#7	0.145447	0.101895	5.61703e-05	1.41922e-08	0.0453124	0.00318021	0.434671	0.156109	0.201348	0.0875523
22	0	0	-6.84277	-21.2505	-26.565	-42.5104	-53.9726	-64.5366	-66.8014	-68.8387	-69.6769	-69.444	-72.4744	-71.565	-69.444	-81.2538	-67.8906																					tir1afb1345	afb1-3 AFB1-mCitrine#5	1.7222e-05	7.09332e-10	2.82512e-26	7.07328e-26	1.15364e-21	3.08237e-21	1.87331e-16	1.33921e-11	3.78182e-10	5.29409e-07
23	-3.27049	-15.5241	-15.9454	-33.0239	-35.8376	-45	-65.556	-73.0725	-68.9625	-72.7585	-80.9097	-77.9052	-77.4712	-79.8753	-82.2348	-78.6901	-74.5778																					tir1afb1345	afb1-3 AFB1-mCitrine#7	0.00101366	1.98174e-08	1.14208e-14	1.11958e-17	7.37516e-12	1.31774e-09	5.80445e-06	0.359131	0.599891	0.185757
24	2.2026	-2.60256	-8.42697	-25.0169	-47.2906	-54.1624	-61.1892	-72.3499	-75.2564	-72.646	-69.1455	-80.8376	-66.2505	-79.1145	-77.4712	-82.2348	-75.4655																					afb1-3 AFB1-mCitrine#5	afb1-3 AFB1-mCitrine#7	0.199695	0.916783	0.000451342	2.97694e-06	1.24081e-09	2.11714e-13	8.25922e-15	4.7196e-20	1.72575e-14	1.0826e-13
25	-2.86241	-11.8887	-27.0721	-40.9144	-52.5946	-61.9275	-61.3895	-75.2564	-75.9638	-77.7352	-75.4655	-80.5377	-81.1193	-84.6442	-79.6951	-87.6141	-85.2364
26	0	0	-13.134	-28.8108	-38.6598	-54.4623	-69.444	-74.0546	-71.565	-80.5377	-78.1113	-81.573	-79.6951	-86.9872	-86.6335	-85.9144	-79.6951
27	2.33731	0	-6.1155	-17.8189	-32.4712	-53.7462	-50.7106	-67.3801	-63.435	-81.1193	-70.9065	-78.6901	-79.6951	-84.2894	-81.8699	-87.6141	-81.3843
28	-3.57633	-2.60256	-6.00901	-20.556	-29.0546	-45	-57.2648	-59.0362	-68.7495	-68.1986	-72.0721	-73.6105	-73.6105	-72.4744	-72.3499	-73.6105	-74.0546
29	-5.94686	-5.71059	-10.3049	-19.2901	-32.9052	-45	-59.9314	-72.3499	-78.3664	-72.646	-78.6901	-80.2176	-74.4759	-80.8376	-73.3008	-74.0546	-83.8845
30	-4.18492	-6.34019	-10.6197	-19.0256	-38.1572	-56.9761	-59.7436	-61.3895	-71.565	-70.3462	-72.8973	-81.8699	-81.8699	-79.5085	-82.5686	-86.1859	-88.4089
31	5.19443	0	-7.12502	-22.9321	-32.0054	-55.008	-68.1986	-74.4759	-79.3803	-76.7595	-76.5043	-85.1009	-84.2894	-80.1342	-79.1145	-85.0303	-79.8753
32	-4.57392	-10.008	-19.0256	-39.4725	-56.3099	-61.9275	-77.4712	-75.9638	-77.4712	-84.4725	-78.3106	-83.3675	-80.9097	-81.2538	-83.6598	-84.2894	-83.991
33	20.8545	15.5241	6.5198	2.04541	-5.71059	-8.1301	-23.6294	-17.354	-40.2364	-33.6901	-43.2643	-48.8141	-56.8887	-67.1663	-72.8973	-78.1113	-77.1957
horizontal	-0.09212	-0.51772	-0.68717	-0.44209	-0.68717	-0.0828	-0.66399	-0.08629	-0.51462	-1.10334	-0.1718	-1.47547	-1.04798	-1.02915	-0.42694	-1.53354	-0.17415
corrected-1	16.2974	10.4363	15.7024	26.123	42.7647	48.7313	62.771	72.5597	75.4491	75.6561	76.2012	79.0622	80.2059	77.0822	78.9534	81.3414	82.9146		cor_ang-t0	0	-5.86108	-0.59505	9.82554	26.4672	32.4339	46.4735	56.2623	59.1517	59.3587	59.9038	62.7648	63.9084	60.7848	62.656	65.044	66.6172
2	9.3702	21.2837	25.8779	37.2522	57.5533	64.9003	76.8072	80.9411	79.6196	78.277	78.9427	83.5548	80.8219	81.8458	79.2682	81.6237	79.3344		2	0	11.9135	16.5077	27.8819	48.1831	55.5301	67.437	71.5709	70.2494	68.9068	69.5725	74.1846	71.4517	72.4756	69.898	72.2535	69.9642
3	5.71461	13.5185	38.6022	44.5579	61.4156	69.6923	79.4702	83.5735	83.7748	80.1505	79.7035	83.9506	81.827	83.5305	86.3932	85.9769	87.7804		3	0	7.80391	32.8876	38.8433	55.7009	63.9777	73.7556	77.8589	78.0602	74.4359	73.9889	78.236	76.1124	77.8159	80.6786	80.2623	82.0658
4	-4.99121	-0.51772	-0.68717	22.7565	33.0029	41.1031	61.0353	64.8968	71.0504	77.5867	69.8451	73.2694	80.2059	78.9629	83.564	83.272	83.2439		4	0	4.47349	4.30404	27.7477	37.9941	46.0943	66.0265	69.888	76.0416	82.5779	74.8363	78.2606	85.1971	83.9541	88.5553	88.2632	88.2351
5	-0.09212	3.71867	5.65302	20.114	41.8233	49.6808	67.5346	78.025	78.7011	79.4343	80.3659	82.5155	85.3757	86.5849	85.9967	86.2639	85.5895		5	0	3.81079	5.74514	20.2061	41.9154	49.773	67.6267	78.1172	78.7932	79.5265	80.458	82.6076	85.4678	86.677	86.0888	86.356	85.6816
6	6.24807	13.5185	35.3402	49.7523	59.2443	68.1158	78.0261	81.3829	81.9895	84.133	83.9221	85.922	88.952	91.9836	89.5731	85.8639	92.0285		6	0	7.27045	29.0921	43.5043	52.9962	61.8677	71.778	75.1349	75.7415	77.885	77.674	79.6739	82.704	85.7356	83.325	79.6158	85.7804
7	4.4818	2.20859	20.3503	31.1654	42.0222	58.3097	64.3191	63.3487	70.3064	68.3406	73.8828	71.4218	75.9574	74.9346	78.2631	74.4302	78.8718		7	0	-2.27321	15.8685	26.6836	37.5404	53.8279	59.8373	58.8669	65.8246	63.8588	69.401	66.94	71.4756	70.4528	73.7813	69.9484	74.39
8	8.52353	15.8718	22.5114	36.4278	49.0765	69.6923	74.4046	77.3849	84.4429	88.8967	84.6338	88.5245	88.952	88.9708	89.5731	88.4665	92.2118		8	0	7.34829	13.9879	27.9043	40.5529	61.1688	65.8811	68.8614	75.9194	80.3731	76.1102	80.001	80.4285	80.4473	81.0495	79.9429	83.6883
9	18.3428	16.8363	34.8505	52.688	56.5776	79.7925	84.1416	86.5472	89.4854	88.8967	91.2254	90.6456	86.4625	91.5734	89.5731	88.4665	89.8259		9	0	-1.50653	16.5077	34.3452	38.2348	61.4497	65.7988	68.2044	71.1425	70.5538	72.8826	72.3028	68.1196	73.2306	71.2302	70.1236	71.483
10	-0.09212	5.82247	13.9337	21.3593	28.7887	54.0796	64.5609	66.1078	66.8655	71.9691	68.9737	71.1705	70.5171	80.5439	82.448	75.074	77.7311		10	0	5.91459	14.0258	21.4514	28.8808	54.1717	64.653	66.1999	66.9576	72.0613	69.0659	71.2626	70.6092	80.636	82.5402	75.1661	77.8232
11	-6.67406	-3.88418	4.50726	13.5941	23.5406	39.7228	65.1083	65.9512	74.2303	77.5867	75.2937	79.5519	78.6472	78.1865	80.1107	79.4938	78.5159		11	0	2.78988	11.1813	20.2682	30.2146	46.3968	71.7823	72.6253	80.9043	84.2608	81.9678	86.226	85.3212	84.8606	86.7848	86.1679	85.19
12	1.59256	5.82247	13.8473	34.5499	49.5073	65.6894	73.3906	72.2636	73.2962	71.152	68.0268	71.2831	73.8835	76.7061	78.7888	81.7566	79.7012		12	0	4.22991	12.2547	32.9574	47.9147	64.0969	71.798	70.671	71.7036	69.5594	66.4342	69.6905	72.291	75.1135	77.1962	80.1641	78.1086
13	-0.09212	3.71867	9.61768	28.6125	34.8505	49.6808	66.5024	71.4788	58.7857	55.9914	50.3557	66.3582	63.4887	74.0394	76.1806	73.2113	74.7018		13	0	3.81079	9.7098	28.7046	34.9426	49.773	66.5945	71.5709	58.8778	56.0835	50.4479	66.4503	63.5808	74.1315	76.2727	73.3035	74.794
14	-1.59956	-0.51772	8.05899	30.5217	37.9726	56.2271	71.5913	78.025	80.7392	79.924	74.7597	78.0331	74.9158	77.0822	79.5651	73.535	77.6254		14	0	1.08184	9.65855	32.1212	39.5722	57.8267	73.1909	79.6246	82.3388	81.5236	76.3593	79.6326	76.5153	78.6817	81.1646	75.1346	79.2249
15	4.95033	8.22844	16.6669	28.9157	46.4339	61.3067	75.8403	76.5212	79.4774	79.8064	75.792	78.3999	81.827	83.5305	86.5603	85.2866	89.8259		15	0	3.27811	11.7165	23.9653	41.4836	56.3564	70.89	71.5709	74.5271	74.856	70.8416	73.4495	76.8767	78.5802	81.6099	80.3363	84.8755
16	-0.09212	15.0064	22.9422	40.9816	49.0765	71.4822	68.78	77.3849	69.6865	74.8604	68.0268	78.2197	72.6918	76.442	71.1381	76.5778	80.3635		16	0	15.0985	23.0343	41.0737	49.1686	71.5744	68.8721	77.477	69.7786	74.9525	68.1189	78.3118	72.7839	76.5342	71.2302	76.6699	80.4556
17	-2.29472	-3.24403	11.2015	29.8144	35.5667	54.3795	64.6591	75.8775	71.0504	71.152	69.8451	70.6458	70.5171	73.3286	69.9192	76.6982	79.0416		17	0	-0.94931	13.4962	32.1091	37.8614	56.6742	66.9539	78.1722	73.3452	73.4467	72.1398	72.9406	72.8118	75.6233	72.214	78.9929	81.3363
18	1.95329	2.49507	16.963	31.3174	47.6793	60.1723	64.5609	80.9411	78.7011	81.7716	78.9427	81.9426	81.1869	80.4401	77.0443	76.5778	84.8561		18	0	0.54178	15.0097	29.3641	45.726	58.219	62.6076	78.9878	76.7478	79.8183	76.9894	79.9893	79.2336	78.4868	75.091	74.6245	82.9028
19	5.34821	6.19212	10.0971	24.5748	36.8814	34.5095	52.4661	57.6381	68.2349	69.2428	72.1781	79.3622	81.0987	86.4813	77.3083	80.0395	80.9452		19	0	0.84391	4.74892	19.2266	31.5332	29.1613	47.1179	52.2899	62.8867	63.8946	66.8299	74.014	75.7505	81.1331	71.9601	74.6913	75.597
20	-0.09212	4.0562	8.28546	17.9929	31.3182	38.577	53.7983	61.613	66.2868	62.3316	66.8961	70.8744	68.9689	74.9346	77.0443	78.1616	71.9472		20	0	4.14832	8.37758	18.085	31.4103	38.6691	53.8905	61.7051	66.3789	62.4237	66.9882	70.9665	69.061	75.0267	77.1364	78.2537	72.0393
21	12.4367	14.2258	25.8779	48.372	62.7478	72.3916	69.1111	73.2145	73.9613	73.9652	73.3238	73.698	71.7106	81.0637	75.5368	75.9377	72.0812		21	0	1.78915	13.4412	35.9353	50.3111	59.9549	56.6745	60.7778	61.5246	61.5285	60.8871	61.2614	59.2739	68.627	63.1001	63.501	59.6445
22	-0.09212	-0.51772	6.1556	20.8084	25.8779	42.4276	53.3086	64.4504	66.2868	67.7354	69.5051	67.9685	71.4265	70.5359	69.017	79.7203	67.7164		22	0	-0.4256	6.24772	20.9005	25.97	42.5198	53.4008	64.5425	66.3789	67.8275	69.5972	68.0606	71.5186	70.628	69.1091	79.8124	67.8085
23	3.17837	15.0064	15.2582	32.5818	35.1505	44.9172	64.8921	72.9862	68.4479	71.6552	80.7379	76.4298	76.4232	78.8462	81.8079	77.1565	74.4037		23	0	11.828	12.0799	29.4034	31.9721	41.7388	61.7137	69.8078	65.2695	68.4768	77.5595	73.2514	73.2448	75.6678	78.6295	73.9782	71.2253
24	-2.29472	2.08484	7.7398	24.5748	46.6034	54.0796	60.5252	72.2636	74.7418	71.5426	68.9737	79.3622	65.2025	78.0853	77.0443	80.7013	75.2914		24	0	4.37956	10.0345	26.8695	48.8982	56.3743	62.8199	74.5583	77.0365	73.8374	71.2685	81.6569	67.4973	80.38	79.339	82.996	77.5861
25	2.77029	11.3709	26.3849	40.4723	51.9075	61.8447	60.7255	75.1701	75.4491	76.6319	75.2937	79.0622	80.0714	83.615	79.2682	86.0805	85.0622		25	0	8.60065	23.6146	37.702	49.1372	59.0744	57.9553	72.3999	72.6788	73.8616	72.5234	76.2919	77.3011	80.8447	76.4979	83.3102	82.2919
26	-0.09212	-0.51772	12.4468	28.3687	37.9726	54.3795	68.78	73.9683	71.0504	79.4343	77.9395	80.0976	78.6472	85.9581	86.2066	84.3808	79.521		26	0	-0.4256	12.539	28.4608	38.0648	54.4716	68.8721	74.0604	71.1425	79.5265	78.0317	80.1897	78.7393	86.0502	86.2987	84.473	79.6131
27	-2.42943	-0.51772	5.42833	17.3768	31.784	53.6634	50.0466	67.2938	62.9203	80.016	70.7347	77.2146	78.6472	83.2603	81.443	86.0805	81.2102		27	0	1.91171	7.85776	19.8062	34.2135	56.0928	52.476	69.7233	65.3498	82.4454	73.1641	79.644	81.0766	85.6897	83.8724	88.5099	83.6396
28	3.48421	2.08484	5.32184	20.114	28.3674	44.9172	56.6008	58.95	68.2349	67.0952	71.9003	72.135	72.5625	71.4453	71.9229	72.0769	73.8804		28	0	-1.39937	1.83763	16.6297	24.8832	41.433	53.1166	55.4657	64.7507	63.611	68.4161	68.6508	69.0783	67.9611	68.4387	68.5927	70.3962
29	5.85474	5.19287	9.61768	18.848	32.2181	44.9172	59.2674	72.2636	77.8518	71.5426	78.5183	78.7421	73.4279	79.8085	72.8738	72.5211	83.7104		29	0	-0.66187	3.76294	12.9932	26.3633	39.0625	53.4127	66.4089	71.997	65.6879	72.6635	72.8874	67.5732	73.9538	67.0191	66.6663	77.8556
30	4.0928	5.82247	9.93249	18.5835	37.4701	56.8933	59.0796	61.3032	71.0504	69.2428	72.7255	80.3944	80.8219	78.4794	82.1416	84.6524	88.2347		30	0	1.72967	5.83969	14.4907	33.3773	52.8005	54.9868	57.2105	66.9576	65.15	68.6327	76.3016	76.7291	74.3866	78.0489	80.5596	84.1419
31	-5.28655	-0.51772	6.43785	22.49	31.3182	54.9252	67.5346	74.3896	78.8657	75.6561	76.3325	83.6254	83.2414	79.105	78.6875	83.4967	79.7012		31	0	4.76883	11.7244	27.7766	36.6048	60.2117	72.8212	79.6762	84.1523	80.9427	81.619	88.912	88.528	84.3916	83.9741	88.7833	84.9877
32	4.4818	9.49026	18.3384	39.0304	55.6228	61.8447	76.8072	75.8775	76.9566	83.3691	78.1388	81.892	79.8617	80.2247	83.2329	82.7559	83.8168		32	0	5.00846	13.8566	34.5486	51.141	57.3629	72.3254	71.3957	72.4748	78.8873	73.657	77.4102	75.3799	75.7429	78.7511	78.2741	79.335
33	-20.9466	-16.0418	-7.20697	-2.4875	5.02342	8.0473	22.9654	17.2677	39.7217	32.5867	43.0925	47.3386	55.8407	66.1372	72.4703	76.5778	77.0216		33	0	4.90475	13.7396	18.4591	25.97	28.9939	43.912	38.2143	60.6683	53.5333	64.0391	68.2852	76.7873	87.0838	93.4169	97.5244	97.9682
afb1-3	0	30	60	90	120	150	180	210	240	270	300	330	360	390	420	450	480		afb1-3	0	30	60	90	120	150	180	210	240	270	300	330	360	390	420	450	480
mean ∠ from hori	4.47551	7.0328	13.0737	24.3337	37.0733	49.7553	61.0827	67.7857	74.3845	77.0536	79.2288	80.7166	81.8777	83.2447	84.2912	85.2339	85.1541		mean ∠ from hori	0	2.55729	8.59823	19.8582	32.5977	45.2798	56.6072	63.3102	69.909	72.5781	74.7533	76.2411	77.4022	78.7692	79.8157	80.7584	80.6786
STDEV	7.49551	8.1004	10.2576	13.3885	14.7443	16.4215	16.8342	15.9086	12.6559	10.5101	8.99581	8.52341	8.08517	6.56942	6.25999	5.74936	6.09023		STDEV	0	5.07235	6.18025	10.0246	11.5287	13.5598	14.0475	13.8452	11.2416	9.28401	8.58059	8.73017	8.48365	8.38764	8.83052	7.9562	9.18726
n	24	24	24	24	24	24	24	24	24	24	24	24	24	24	24	24	24		n	24	24	24	24	24	24	24	24	24	24	24	24	24	24	24	24	24
SE	1.53001	1.65349	2.09382	2.73291	3.00968	3.35202	3.43626	3.24733	2.58337	2.14537	1.83626	1.73983	1.65038	1.34098	1.27782	1.17358	1.24316		SE	0	1.03539	1.26154	2.04625	2.35328	2.76789	2.86743	2.82615	2.29469	1.89509	1.75151	1.78204	1.73172	1.71212	1.80252	1.62405	1.87534
TTEST (Col)	0.2465	0.528798	0.62682	0.189466	0.319446	0.278359	0.34886	0.460512	0.639242	0.258231	0.0203521	0.103954	0.0183912	0.0463387	0.00614074	0.00183609	0.0109978		TTEST (Col)		0.465528	0.0453687	0.00931653	0.0380226	0.0459057	0.0700423	0.120482	0.736947	0.709832	0.106595	0.517184	0.191693	0.576526	0.296851	0.235282	0.388163
raw-1	11.5922	2.29061	-2.1211	-15.124	-29.0546	-40.9144	-57.9946	-74.0546	-79.6951	-86.0548	-86.0548	-84.8056	-84.5597	-88.0251	-88.5312	-90	-86.0548
2	-8.74616	-6.70984	-20.8545	-30.9638	-47.2906	-53.1301	-59.5345	-76.4296	-72.4744	-79.1145	-79.8753	-83.8298	-82.875	-85.9144	-90	-87.7974	-84.8056
3	1.4321	-8.1301	-23.1986	-39.8056	-56.3099	-71.565	-78.6901	-84.8056	-85.6013	-84.8056	-87.9546	-90	-85.6013	-87.5105	-90	-87.9546	-90
4	1.50744	1.4321	-3.17983	-9.86581	-26.565	-47.4896	-54.1624	-57.7244	-66.1941	-64.5366	-65.8545	-71.565	-73.3008	-67.751	-71.565	-73.4956	-70.9744
5	-15.5241	-19.179	-26.565	-51.3402	-57.2648	-68.1986	-70.71	-78.1113	-86.9872	-87.5105	-87.7974	-85.2364	-90	-87.2737	-86.1859	-87.3974	-83.2902
6	-5.71059	-6.34019	-14.0362	-22.8336	-34.5085	-46.7357	-57.9946	-69.7751	-76.5043	-80.2176	-82.1467	-83.4802	-87.1376	-92.3859	-90	-91.5911	-90
7	0	-4.23639	-8.97263	-19.44	-30.9638	-50.1944	-62.5924	-73.4956	-79.1145	-77.1957	-77.6609	-81.573	-79.2157	-80.1342	-83.6598	-87.3974	-94.5739
8	-1.97493	-5.71059	-23.1986	-33.6901	-48.5763	-72.3499	-78.6901	-80.5377	-80.2176	-82.5686	-82.1467	-83.4181	-80.9097	-82.5686	-85.0303	-90	-90
9	-17.4472	-24.7751	-36.8699	-46.9749	-68.9625	-75.2564	-87.6141	-90	-90	-96.8428	-94.2364	-95.0425	-92.0454	-93.9452	-96.3402	-96.3402	-97.125
10	-3.01279	-12.5288	-9.46232	-31.2637	-42.8789	-39.8056	-55.6197	-60.2551	-67.751	-71.565	-78.0239	-83.6598	-88.3634	-88.0251	-87.5105	-90	-87.7094
11	-8.84181	-10.3049	-15.2551	-39.8056	-46.9749	-56.3099	-68.1986	-70.2011	-78.3106	-76.4296	-79.992	-84.8056	-85.6013	-87.5105	-87.1376	-80.5377	-82.4054
12	0	-4.08562	-10.8855	-29.7449	-36.8699	-54.4623	-60.6422	-72.3499	-77.9052	-81.6341	-83.0888	-87.8789	-85.9144	-85.0303	-85.4261	-84.2894	-85.4261
13	2.72631	9.86581	3.57633	4.23639	-5.71059	-14.7436	-15.7086	-34.3803	-46.7357	-54.4623	-65.3764	-66.8014	-65.7722	-75.9638	-83.6598	-83.6598	-84.6442
14	1.78991	2.72631	0	-9.46232	-23.9625	-35.5377	-43.5312	-56.3099	-61.1892	-68.1986	-72.1811	-81.4692	-80.1342	-84.0939	-79.6951	-80.5377	-80.5377
15	-1.70981	-7.12502	-9.46232	-26.565	-41.9872	-53.7462	-63.435	-71.565	-77.4712	-83.6598	-87.6141	-87.2737	-90	-90	-81.8699	-83.6598	-84.0939
16	7.69605	0	-3.36646	-10.6197	-18.435	-33.6901	-46.2189	-45	-50.9061	-66.0375	-63.435	-60.5241	-65.2249	-69.1455	-81.0274	-80.1342	-81.8699
17	-7.85331	-21.8014	-21.8014	-33.0239	-39.8056	-53.7462	-76.7595	-82.6476	-88.0251	-88.3153	-83.8298	-81.8699	-75.9638	-74.7449	-83.4181	-84.4725	-84.0939
18	-4.61065	-8.36589	-12.8043	-23.9625	-31.6075	-43.3634	-69.2278	-77.9052	-83.6598	-91.6847	-90	-85.2364	-81.8699	-83.2902	-90	-91.302	-91.5074
19	-1.50744	-12.0948	-8.53077	-15.9454	-27.8973	-33.6901	-46.273	-41.9872	-85.9144	-70.9065	-80.5377	-83.2902	-93.5763	-87.2737	-87.2737	-92.1211	-90
20	-4.76364	-8.1301	-8.53077	-8.74616	-15.5241	-29.0546	-36.0274	-35.5377	-47.7263	-61.5571	-64.6538	-66.0375	-64.9831	-79.3803	-69.444	-78.1113	-71.565
21	-1.4321	-2.86241	-7.76517	-21.8014	-39.8056	-56.3099	-63.435	-71.565	-75.5297	-84.8056	-67.0679	-66.1941	-75.9638	-84.8056	-72.8973	-73.6105	-81.8699
22	-2.663	-2.2026	-2.48955	-14.0362	-20.2249	-23.1986	-40.6013	-58.5704	-64.6538	-75.0686	-75.9638	-78.6901	-83.6598	-87.1376	-86.1859	-86.4237	-90
23	-15.9454	-15.5241	-26.565	-32.7352	-45	-68.1986	-80.5377	-85.0303	-87.1376	-90	-91.5911	-88.0251	-83.2902	-85.0303	-80.9097	-84.5597	-83.2902
24	-18.0042	-13.3925	-25.4633	-33.1113	-49.3987	-70.3462	-81.0274	-82.875	-81.573	-87.7094	-80.5377	-80.5377	-87.1376	-79.2157	-81.2538	-90	-81.8699
horizontal	0.60038	-0.34989	-0.16802	-0.52563	0.17415	0.08708	0.44831	-0.17739	-0.25203	-1.73308	-0.2554	-0.16852	0.08185	-0.34515	0.16536	-0.4075	-0.16704
corrected-1	-10.9918	-2.6405	1.95308	14.5984	29.2288	41.0015	58.4429	73.8772	79.4431	84.3217	85.7994	84.6371	84.6415	87.6799	88.6966	89.5925	85.8878			0	8.3513	12.9449	25.5902	40.2206	51.9933	69.4347	84.869	90.4349	95.3135	96.7912	95.6288	95.6333	98.6717	99.6884	100.584	96.8796
2	9.34654	6.35995	20.6864	30.4381	47.4648	53.2172	59.9828	76.2522	72.2224	77.3814	79.6199	83.6613	82.9568	85.5692	90.1654	87.3899	84.6385			0	-2.98659	11.3399	21.0916	38.1182	43.8706	50.6362	66.9056	62.8759	68.0348	70.2734	74.3148	73.6103	76.2227	80.8188	78.0434	75.292
3	-0.83172	7.78021	23.0306	39.2799	56.4841	71.6521	79.1384	84.6282	85.3493	83.0725	87.6992	89.8315	85.6831	87.1653	90.1654	87.5471	89.833			0	8.61193	23.8623	40.1117	57.3158	72.4839	79.9701	85.4599	86.181	83.9042	88.5309	90.6632	86.5149	87.997	90.9971	88.3788	90.6647
4	-0.90706	-1.78199	3.01181	9.34018	26.7392	47.5766	54.6107	57.547	65.942	62.8036	65.5991	71.3965	73.3826	67.4058	71.7304	73.0881	70.8073			0	-0.87493	3.91887	10.2472	27.6463	48.4837	55.5177	58.454	66.8491	63.7106	66.5061	72.3036	74.2897	68.3129	72.6375	73.9952	71.7144
5	16.1245	18.8291	26.397	50.8146	57.4389	68.2857	71.1583	77.9339	86.7352	85.7774	87.542	85.0678	90.0819	86.9285	86.3513	86.9899	83.1231			0	2.70463	10.2725	34.6901	41.3144	52.1612	55.0338	61.8095	70.6107	69.6529	71.4175	68.9434	73.9574	70.804	70.2268	70.8655	66.9986
6	6.31097	5.9903	13.8682	22.308	34.6827	46.8228	58.4429	69.5977	76.2522	78.4845	81.8913	83.3117	87.2194	92.0408	90.1654	91.1836	89.833			0	-0.32067	7.55725	15.997	28.3717	40.5118	52.132	63.2868	69.9413	72.1735	75.5803	77.0007	80.9085	85.7298	83.8544	84.8727	83.522
7	0.60038	3.8865	8.80461	18.9144	31.1379	50.2815	63.0407	73.3182	78.8624	75.4626	77.4055	81.4045	79.2976	79.789	83.8252	86.9899	94.4069			0	3.28612	8.20423	18.314	30.5375	49.6811	62.4403	72.7179	78.2621	74.8623	76.8051	80.8041	78.6972	79.1887	83.2248	86.3896	93.8065
8	2.57531	5.3607	23.0306	33.1644	48.7505	72.437	79.1384	80.3603	79.9656	80.8355	81.8913	83.2495	80.9916	82.2234	85.1956	89.5925	89.833			0	2.78539	20.4553	30.5891	46.1752	69.8616	76.5631	77.785	77.3902	78.2602	79.316	80.6742	78.4163	79.6481	82.6203	87.0172	87.2576
9	18.0476	24.4253	36.7019	46.4493	69.1366	75.3435	88.0624	89.8226	89.748	95.1097	93.981	94.8739	92.1273	93.6	96.5056	95.9327	96.958			0	6.37768	18.6543	28.4017	51.0891	57.2959	70.0148	71.775	71.7004	77.0621	75.9334	76.8264	74.0797	75.5525	78.458	77.8851	78.9104
10	3.61317	12.1789	9.2943	30.7381	43.053	39.8927	56.068	60.0777	67.4989	69.832	77.7685	83.4913	88.4453	87.6799	87.6758	89.5925	87.5423			0	8.56575	5.68113	27.1249	39.4399	36.2795	52.4548	56.4646	63.8858	66.2188	74.1553	79.8781	84.8321	84.0667	84.0626	85.9793	83.9292
11	9.44219	9.95496	15.0871	39.2799	47.1491	56.397	68.6469	70.0237	78.0586	74.6965	79.7366	84.6371	85.6831	87.1653	87.303	80.1302	82.2383			0	0.51277	5.64491	29.8378	37.7069	46.9548	59.2047	60.5815	68.6164	65.2543	70.2944	75.1949	76.241	77.7231	77.8608	70.688	72.7961
12	0.60038	3.73573	10.7175	29.2192	37.044	54.5494	61.0906	72.1725	77.6532	79.901	82.8334	87.7104	85.9962	84.6851	85.5914	83.8819	85.259			0	3.13535	10.1171	28.6189	36.4437	53.949	60.4902	71.5721	77.0528	79.3007	82.233	87.11	85.3958	84.0847	84.9911	83.2815	84.6587
13	-2.12593	-10.2157	-3.74435	-4.76202	5.88474	14.8306	16.157	34.2029	46.4837	52.7292	65.121	66.6329	65.8541	75.6186	83.8252	83.2523	84.4771			0	-8.08977	-1.61842	-2.63609	8.01067	16.9566	18.2829	36.3289	48.6096	54.8552	67.247	68.7588	67.98	77.7445	85.9511	85.3782	86.6031
14	-1.18953	-3.0762	-0.16802	8.93669	24.1366	35.6248	43.9795	56.1325	60.9372	66.4655	71.9257	81.3007	80.216	83.7487	79.8605	80.1302	80.3706			0	-1.88667	1.02151	10.1262	25.3262	36.8143	45.169	57.3221	62.1267	67.655	73.1152	82.4902	81.4056	84.9382	81.05	81.3197	81.5602
15	2.31019	6.77513	9.2943	26.0394	42.1614	53.8332	63.8833	71.3877	77.2192	81.9267	87.3587	87.1052	90.0819	89.6548	82.0353	83.2523	83.9268			0	4.46494	6.98411	23.7292	39.8512	51.5231	61.5731	69.0775	74.909	79.6165	85.0485	84.795	87.7717	87.3447	79.7251	80.9421	81.6166
16	-7.09567	-0.34989	3.19844	10.094	18.6091	33.7771	46.6672	44.8226	50.6541	64.3044	63.1795	60.3556	65.3067	68.8004	81.1927	79.7267	81.7029			0	6.74578	10.2941	17.1897	25.7048	40.8728	53.7629	51.9183	57.7498	71.4001	70.2752	67.4513	72.4024	75.8961	88.2884	86.8224	88.7985
17	8.45369	21.4515	21.6334	32.4982	39.9797	53.8332	77.2078	82.4702	87.773	86.5822	83.5744	81.7014	76.0456	74.3997	83.5834	84.065	83.9268			0	12.9978	13.1797	24.0446	31.526	45.3796	68.7541	74.0165	79.3194	78.1286	75.1207	73.2477	67.5919	65.946	75.1297	75.6113	75.4731
18	5.21103	8.016	12.6363	23.4369	31.7817	43.4505	69.6761	77.7279	83.4078	89.9516	89.7446	85.0678	81.9518	82.945	90.1654	90.8945	91.3404			0	2.80497	7.42522	18.2258	26.5706	38.2395	64.465	72.5168	78.1967	84.7406	84.5336	79.8568	76.7407	77.734	84.9543	85.6834	86.1294
19	2.10782	11.7449	8.36275	15.4198	28.0714	33.7771	46.7213	41.8098	85.6623	69.1734	80.2823	83.1216	93.6582	86.9285	87.4391	91.7136	89.833			0	9.63705	6.25493	13.3119	25.9636	31.6693	44.6135	39.702	83.5545	67.0656	78.1745	81.0138	91.5504	84.8207	85.3312	89.6058	87.7251
20	5.36402	7.78021	8.36275	8.22053	15.6983	29.1417	36.4757	35.3603	47.4743	59.824	64.3984	65.869	65.065	79.0352	69.6093	77.7038	71.398			0	2.41619	2.99873	2.85651	10.3342	23.7777	31.1117	29.9963	42.1103	54.46	59.0344	60.505	59.7009	73.6712	64.2453	72.3398	66.034
21	2.03248	2.51252	7.59715	21.2758	39.9797	56.397	63.8833	71.3877	75.2777	83.0725	66.8125	66.0255	76.0456	84.4604	73.0626	73.203	81.7029			0	0.48004	5.56467	19.2433	37.9472	54.3645	61.8508	69.3552	73.2452	81.04	64.78	63.9931	74.0131	82.4279	71.0302	71.1705	79.6704
22	3.26338	1.85271	2.32153	13.5106	20.399	23.2857	41.0496	58.393	64.4018	73.3355	75.7084	78.5216	83.7417	86.7924	86.3513	86.0162	89.833			0	-1.41067	-0.94185	10.2472	17.1356	20.0223	37.7862	55.1297	61.1384	70.0721	72.445	75.2582	80.4783	83.5291	83.0879	82.7528	86.5696
23	16.5458	15.1742	26.397	32.2096	45.1741	68.2857	80.986	84.8529	86.8856	88.2669	91.3357	87.8565	83.372	84.6851	81.0751	84.1522	83.1231			0	-1.37156	9.85125	15.6638	28.6284	51.7399	64.4402	68.3071	70.3398	71.7211	74.79	71.3108	66.8262	68.1393	64.5293	67.6064	66.5773
24	18.6045	13.0426	25.2953	32.5857	49.5729	70.4333	81.4757	82.6976	81.321	85.9763	80.2823	80.3692	87.2194	78.8705	81.4192	89.5925	81.7029			0	-5.56193	6.69079	13.9812	30.9683	51.8287	62.8711	64.093	62.7165	67.3718	61.6777	61.7646	68.6149	60.266	62.8147	70.988	63.0983
tir1-1	0	30	60	90	120	150	180	210	240	270	300	330	360	390	420	450	480		tir1-1	0	30	60	90	120	150	180	210	240	270	300	330	360	390	420	450	480
mean ∠ from hori	5.70525	6.89092	14.2841	26.7838	35.8233	47.7771	58.9224	69.0797	74.3106	76.3084	77.4021	80.6268	82.6994	83.5791	82.683	82.5252	81.5699		mean ∠ from hori	0	1.18567	8.5788	21.0785	30.118	42.0719	53.2172	63.3745	68.6053	70.6031	71.6969	74.9215	76.9941	77.8738	76.9778	76.82	75.8647
STDEV	7.5519	9.46694	11.0468	13.2941	15.6115	13.9559	13.4827	14.6799	9.01946	9.89664	9.64018	7.1988	8.12228	6.07274	6.43486	5.66873	6.86368		STDEV	0	4.59464	7.53476	10.3339	13.2743	11.6166	11.3846	14.1556	8.41911	9.62575	9.59406	7.69996	8.57153	7.71223	7.44249	7.21275	7.74715
n	39	39	39	39	39	39	39	39	39	39	39	39	39	39	39	39	39		n	39	39	39	39	39	39	39	39	39	39	39	39	39	39	39	39	39
SE	1.20927	1.51592	1.76891	2.12875	2.49984	2.23473	2.15896	2.35067	1.44427	1.58473	1.54366	1.15273	1.30061	0.972416	1.0304	0.907723	1.09907		SE	0	0.735732	1.20653	1.65475	2.12559	1.86014	1.823	2.2667	1.34814	1.54135	1.53628	1.23298	1.37254	1.23494	1.19175	1.15496	1.24054
TTEST (Col)	0.0438261	0.552272	0.955391	0.481875	0.137304	0.051194	0.0460274	0.616348	0.526354	0.308848	0.0766716	0.0494146	0.00175087	0.00890363	0.0374986	0.0968885	0.645105		TTEST (Col)		0.0329941	0.038876	0.0130955	0.00188729	0.00025628	0.000157115	0.0709952	0.226248	0.608934	0.838401	0.975272	0.194471	0.882178	0.773012	0.415109	0.120582
raw-1	-8.29714	-8.1301	-23.1986	-40.6013	-43.0251	-50.1944	-63.435	-68.1986	-70.56	-74.7449	-77.9052	-80.5377	-84.5597	-86.8202	-84.2894	-86.5318	-85.7636
2	-3.46823	-12.9946	-22.9321	-36.8699	-63.435	-61.3895	-75.0686	-81.2538	-78.6901	-83.4181	-82.0928	-84.6442	-85.6013	-86.0548	-87.5105	-87.9546	-92.0454
3	-4.39871	-8.53077	-11.3099	-38.6598	-50.1944	-42.7094	-64.6538	-81.0274	-81.4692	-78.6901	-82.6476	-87.7094	-90	-90	-90	-85.9144	-90
4	-9.2726	-16.3895	-32.4712	-47.4896	-73.6105	-76.6075	-82.875	-85.4261	-85.0303	-83.8845	-84.5597	-84.4725	-83.1572	-85.1009	-85.9144	-84.5597	-85.6013
5	2.48955	0	-7.59464	-23.1986	-39.8056	-51.3402	-68.1986	-82.2348	-73.3008	-82.2348	-79.6951	-83.6598	-85.2364	-84.6442	-83.2902	-80.1342	-81.2538
6	-7.49586	-16.6992	-28.0725	-39.2894	-53.1301	-56.3099	-76.6075	-86.1859	-87.5105	-85.4261	-90	-90	-93.3665	-90	-90	-87.2737	-88.0251
7	0.97102	2.2026	-2.2026	-30.4655	-34.992	-45	-48.5763	-67.1663	-77.1957	-69.6769	-76.866	-75.0686	-76.6075	-83.0888	-68.9625	-75.1735	-72.646
8	-8.65254	-8.97263	-17.5256	-37.5686	-47.7263	-67.1663	-73.3008	-78.6901	-85.2364	-83.6598	-84.0939	-80.9097	-79.6951	-78.1113	-74.4759	-80.5377	-76.7595
9	-20.556	-26.565	-45	-59.0362	-67.3801	-69.444	-75.9638	-86.9872	-82.5686	-84.5597	-85.0303	-83.4181	-84.8056	-90	-92.2026	-86.1859	-88.4518
10	0	0	-8.97263	-18.435	-42.5104	-48.0128	-55.008	-81.8699	-74.9315	-66.0375	-64.5366	-70.9065	-77.1957	-80.2724	-84.5597	-83.1572	-74.6238
11	-11.5922	-15.9454	-20.556	-24.7751	-27.7585	-41.1859	-53.7462	-77.4712	-80.5377	-80.9097	-85.9144	-88.1524	-90	-94.9697	-90	-91.5074	-85.9144
12	-3.36646	3.46823	0	0	-5.19443	-26.565	-34.992	-35.5377	-55.008	-53.5308	-62.1027	-69.1455	-74.5778	-76.7595	-78.6901	-79.8753	-78.6901
13	-3.57633	-8.53077	-32.4712	-41.9872	-42.7094	-59.0362	-56.3099	-82.5686	-79.6951	-86.1859	-81.8699	-80.5377	-83.8845	-83.1572	-81.8699	-81.8699	-81.8699
14	-19.9831	-26.565	-28.6105	-57.5288	-57.9946	-74.7449	-85.0303	-85.2364	-83.4181	-88.0909	-87.7974	-91.3639	-95.1944	-97.125	-97.4314	-92.2026	-90
15	-1.84761	0	-8.53077	-6.00901	-19.179	-25.4633	-36.8699	-31.6075	-58.3925	-45	-59.0362	-74.0546	-75.9638	-79.0459	-74.7449	-84.5597	-79.3803
16	-1.7357	-4.39871	-26.565	-37.5686	-45	-52.125	-63.435	-83.2902	-79.2157	-79.8753	-76.6075	-81.573	-77.6609	-80.8376	-81.2538	-74.0546	-72.3499
17	9.72758	5.44033	-2.04541	-4.39871	-9.46232	-35.2176	-40.3645	-60.2551	-66.8014	-74.7449	-74.0546	-77.0054	-68.7495	-83.4181	-74.7449	-75.2564	-73.0725
18	-24.7751	-23.4986	-32.0054	-34.992	-53.9726	-57.9946	-67.8337	-80.5377	-82.875	-86.3086	-84.2894	-87.7974	-90	-92.1211	-90	-90	-84.0939
19	-14.7436	-12.5288	-20.8545	-34.5085	-45	-63.435	-77.1957	-83.6598	-81.573	-81.4692	-81.8699	-85.9144	-81.4692	-81.573	-80.5377	-83.6598	-82.2348
20	-8.84181	-13.134	-13.134	-30.0686	-38.2902	-50.5275	-57.5288	-73.0725	-73.3008	-79.0459	-75.9638	-83.2902	-87.6141	-82.6476	-78.2317	-76.5043	-67.0679
21	-1.50744	0	-2.2026	-20.8545	-30.0686	-36.8699	-47.4896	-49.7636	-46.8476	-47.4896	-50.1944	-57.9946	-56.8887	-64.6538	-78.6901	-76.5043	-77.4712
22	0	0	-2.663	-20.8545	-33.6901	-55.4915	-59.9314	-63.435	-73.3008	-74.0546	-77.9052	-87.9546	-87.2737	-83.6598	-90	-82.875	-85.6013
23	-0.67404	-4.23639	-12.7244	-26.565	-32.2756	-51.3402	-72.3499	-81.0274	-82.5686	-80.2176	-82.5686	-83.991	-86.0548	-81.2538	-85.0303	-78.6901	-80.9097
24	-5.52754	-2.29061	-10.3049	-25.3462	-33.6901	-47.1211	-68.1986	-68.9625	-74.4759	-73.6105	-80.9097	-79.992	-78.3106	-74.2914	-80.1342	-82.2348	-81.573
25	-4.08562	-1.59114	-6.84277	-22.6199	-29.0546	-50.1944	-49.1849	-54.2933	-65.3764	-70.0169	-71.565	-80.5377	-80.9097	-82.4054	-75.3791	-77.1957	-78.2317
26	-10.3049	-7.90716	-9.46232	-31.6075	-31.4296	-52.4314	-59.0362	-72.7585	-73.6105	-82.875	-81.2538	-86.9059	-90	-93.1798	-83.991	-90	-93.3665
27	-14.3814	-19.9831	-23.6294	-27.8973	-39.8056	-61.9275	-59.9314	-72.646	-79.2157	-79.5085	-82.875	-88.0909	-87.8789	-91.5074	-90	-87.1376	-90
28	-18.1381	-23.1986	-24.444	-32.4712	-36.0274	-51.8428	-55.4915	-64.44	-78.6901	-79.6951	-78.4078	-83.0189	-83.0888	-84.5077	-84.8056	-87.7094	-85.9144
29	-17.418	-15.0685	-24.6769	-27.7585	-35.5377	-51.953	-65.2249	-57.5288	-77.125	-83.0888	-78.6901	-85.486	-90	-88.0909	-87.3974	-90	-88.1524
30	0	10.3049	0	-8.1301	-11.3099	-27.646	-45	-71.9958	-74.0546	-76.866	-79.1145	-83.8845	-84.2894	-90	-90	-94.7636	-90
31	1.19349	0	-8.74616	-14.6209	-27.8973	-36.8699	-57.0948	-75.9638	-72.646	-85.0303	-84.8056	-85.4261	-90	-90	-84.8056	-93.1798	-87.3974
32	-6.91123	-13.2405	-12.9946	-23.1986	-45	-61.3895	-72.646	-82.875	-77.9052	-83.4181	-82.875	-88.2643	-82.875	-87.6141	-85.0303	-85.7636	-87.1376
33	3.69139	12.5288	0	-10.3049	-22.8336	-38.1572	-52.4314	-55.3049	-67.3801	-78.3106	-75.2564	-80.1342	-78.6901	-83.8298	-82.875	-80.5377	-71.565
34	-11.8887	-10.3049	-12.5288	-29.7449	-32.2756	-41.6335	-65.2249	-67.8337	-78.6901	-82.4054	-85.0303	-88.5679	-83.2902	-81.0274	-81.8699	-77.1957	-69.6769
35	-9.46232	-7.12502	-13.2405	-23.1986	-33.6901	-45	-59.5345	-56.3099	-73.0725	-82.875	-77.7352	-82.875	-82.4054	-80.1342	-85.4261	-86.4237	-82.6476
36	2.7927	-3.17983	-3.94519	-13.4957	-18.435	-27.7585	-31.6075	-49.8991	-63.435	-73.3008	-76.866	-75.9638	-85.6013	-87.2737	-84.2894	-83.6598	-76.7595
37	-9.03948	-7.43141	-12.5288	-18.435	-22.8336	-32.7352	-53.1301	-68.9625	-72.1811	-76.373	-70.56	-74.9315	-64.7989	-79.0459	-71.565	-73.6105	-81.4692
38	0	0	-6.00901	-14.4208	-11.3099	-17.1027	-33.6901	-43.1524	-56.3099	-66.5713	-45	-63.435	-67.1663	-82.4054	-69.444	-75.9638	-69.7751
39	-4.63546	-8.1301	-9.46232	-22.8336	-23.1986	-34.6951	-53.6157	-51.3402	-67.1663	-75.9638	-83.4181	-86.9059	-93.8141	-85.9144	-85.2364	-85.0303	-80.5377
horizontal	-0.59504	-0.6123	-0.59949	-0.33953	-0.34936	-0.34155	-0.50853	-0.17078	0.1731	-0.59328	-0.08413	-1.02762	0.16926	-0.94766	-0.51385	-0.94624	-0.17442
corrected-1	7.7021	7.5178	22.5991	40.2618	42.6757	49.8529	62.9264	68.0278	70.7331	74.1516	77.8211	79.5101	84.7289	85.8725	83.7756	85.5855	85.5892			0	-0.1843	14.897	32.5597	34.9736	42.1508	55.2243	60.3257	63.031	66.4495	70.119	71.808	77.0268	78.1704	76.0735	77.8834	77.8871
2	2.87319	12.3823	22.3326	36.5304	63.0856	61.048	74.5601	81.0831	78.8632	82.8248	82.0087	83.6166	85.7706	85.1072	86.9966	87.0083	91.871			0	9.50913	19.4594	33.6572	60.2124	58.1748	71.6869	78.2099	75.99	79.9516	79.1355	80.7434	82.8974	82.234	84.1234	84.1352	88.9978
3	3.80367	7.91847	10.7104	38.3203	49.8451	42.3678	64.1453	80.8566	81.6423	78.0968	82.5635	86.6818	90.1693	89.0523	89.4861	84.9681	89.8256			0	4.1148	6.90677	34.5166	46.0414	38.5642	60.3416	77.0529	77.8387	74.2931	78.7598	82.8781	86.3656	85.2487	85.6825	81.1645	86.0219
4	8.67756	15.7772	31.8717	47.15	73.2611	76.266	82.3665	85.2553	85.2034	83.2912	84.4755	83.4448	83.3265	84.1532	85.4005	83.6134	85.4269			0	7.09968	23.1941	38.4725	64.5835	67.5884	73.6889	76.5777	76.5258	74.6137	75.798	74.7673	74.6489	75.4757	76.723	74.9359	76.7493
5	-3.08459	-0.6123	6.99515	22.8591	39.4562	50.9986	67.6901	82.0641	73.4739	81.6415	79.611	82.6322	85.4056	83.6965	82.7763	79.188	81.0794			0	2.47229	10.0797	25.9436	42.5408	54.0832	70.7747	85.1486	76.5585	84.7261	82.6956	85.7168	88.4902	86.7811	85.8609	82.2725	84.164
6	6.90082	16.0869	27.473	38.9499	52.7807	55.9684	76.099	86.0152	87.6836	84.8328	89.9159	88.9724	93.5357	89.0523	89.4861	86.3274	87.8507			0	9.18612	20.5722	32.0491	45.8799	49.0676	69.1982	79.1143	80.7827	77.932	83.0151	82.0716	86.6349	82.1515	82.5853	79.4266	80.9498
7	-1.56606	-2.8149	1.60311	30.126	34.6427	44.6585	48.0678	66.9956	77.3688	69.0836	76.7818	74.041	76.7768	82.1411	68.4486	74.2273	72.4716			0	-1.24884	3.16917	31.6921	36.2087	46.2245	49.6339	68.5616	78.9349	70.6496	78.3479	75.607	78.3428	83.7072	70.0147	75.7933	74.0376
8	8.0575	8.36033	16.9261	37.2291	47.377	66.8248	72.7922	78.5193	85.4095	83.0665	84.0097	79.8821	79.8644	77.1637	73.962	79.5914	76.5851			0	0.30283	8.86858	29.1716	39.3195	58.7673	64.7347	70.4618	77.352	75.009	75.9522	71.8246	71.8069	69.1062	65.9045	71.5339	68.5276
9	19.961	25.9527	44.4005	58.6967	67.0308	69.1024	75.4552	86.8164	82.7417	83.9664	84.9461	82.3904	84.9748	89.0523	91.6887	85.2397	88.2774			0	5.99174	24.4395	38.7357	47.0698	49.1414	55.4942	66.8554	62.7807	64.0054	64.9851	62.4294	65.0138	69.0913	71.7277	65.2787	68.3164
10	-0.59504	-0.6123	8.37314	18.0954	42.1611	47.6712	54.4995	81.6991	75.1046	65.4442	64.4525	69.8789	77.365	79.3248	84.0458	82.211	74.4493			0	-0.01726	8.96818	18.6905	42.7561	48.2663	55.0945	82.2942	75.6997	66.0393	65.0476	70.4739	77.96	79.9198	84.6409	82.806	75.0444
11	10.9971	15.3331	19.9566	24.4356	27.4092	40.8444	53.2376	77.3004	80.7108	80.3164	85.8302	87.1248	90.1693	94.0221	89.4861	90.5612	85.74			0	4.33596	8.95942	13.4385	16.412	29.8472	42.2405	66.3033	69.7136	69.3193	74.8331	76.1276	79.1721	83.0249	78.489	79.5641	74.7428
12	2.77142	-4.08053	-0.59949	-0.33953	4.84507	26.2235	34.4835	35.3669	55.1811	52.9375	62.0186	68.1179	74.7471	75.8118	78.1762	78.9291	78.5157			0	-6.85195	-3.37091	-3.11095	2.07365	23.4521	31.7121	32.5955	52.4097	50.1661	59.2472	65.3465	71.9757	73.0404	75.4048	76.1577	75.7442
13	2.98129	7.91847	31.8717	41.6477	42.36	58.6947	55.8014	82.3978	79.8683	85.5926	81.7858	79.5101	84.0538	82.2096	81.356	80.9237	81.6955			0	4.93718	28.8904	38.6664	39.3787	55.7134	52.8201	79.4165	76.887	82.6114	78.8045	76.5288	81.0725	79.2283	78.3748	77.9424	78.7142
14	19.3881	25.9527	28.011	57.1893	57.6453	74.4033	84.5217	85.0656	83.5912	87.4976	87.7133	90.3363	95.3637	96.1774	96.9176	91.2564	89.8256			0	6.56468	8.6229	37.8012	38.2572	55.0153	65.1337	65.6775	64.2031	68.1095	68.3252	70.9482	75.9756	76.7893	77.5295	71.8683	70.4375
15	1.25257	-0.6123	7.93128	5.66948	18.8297	25.1218	36.3614	31.4367	58.5656	44.4067	58.9521	73.027	76.133	78.0983	74.231	83.6134	79.2059			0	-1.86487	6.67871	4.41691	17.5771	23.8692	35.1088	30.1842	57.313	43.1542	57.6995	71.7744	74.8804	76.8457	72.9785	82.3609	77.9534
16	1.14066	3.78641	25.9656	37.2291	44.6506	51.7835	62.9264	83.1194	79.3888	79.282	76.5234	80.5454	77.8302	79.89	80.74	73.1084	72.1755			0	2.64575	24.8249	36.0884	43.51	50.6428	61.7858	81.9787	78.2481	78.1414	75.3827	79.4048	76.6895	78.7493	79.5993	71.9677	71.0348
17	-10.3226	-6.05263	1.44592	4.05918	9.11296	34.876	39.856	60.0843	66.9745	74.1516	73.9705	75.9778	68.9187	82.4704	74.231	74.3102	72.8981			0	4.26999	11.7685	14.3818	19.4356	45.1987	50.1786	70.407	77.2971	84.4742	84.2931	86.3004	79.2414	92.793	84.5536	84.6328	83.2207
18	24.1801	22.8863	31.4059	34.6525	53.6233	57.6531	67.3251	80.3669	83.0481	85.7153	84.2053	86.7698	90.1693	91.1734	89.4861	89.0538	83.9194			0	-1.29383	7.22579	10.4724	29.4432	33.473	43.145	56.1868	58.868	61.5352	60.0252	62.5897	65.9892	66.9933	65.306	64.8737	59.7393
19	14.1485	11.9165	20.255	34.169	44.6506	63.0934	76.6872	83.489	81.7461	80.8759	81.7858	84.8868	81.6385	80.6254	80.0238	82.7136	82.0604			0	-2.23201	6.10645	20.0205	30.5021	48.9449	62.5387	69.3405	67.5976	66.7274	67.6372	70.7382	67.49	66.4768	65.8753	68.565	67.9119
20	8.24677	12.5217	12.5345	29.7291	37.9408	50.186	57.0203	72.9017	73.4739	78.4527	75.8796	82.2625	87.7833	81.7	77.7179	75.558	66.8935			0	4.27495	4.28776	21.4823	29.694	41.9392	48.7735	64.6549	65.2271	70.2059	67.6329	74.0158	79.5365	73.4532	69.4711	67.3113	58.6467
21	0.9124	-0.6123	1.60311	20.5149	29.7192	36.5284	46.981	49.5929	47.0207	46.8963	50.1103	56.967	57.0579	63.7062	78.1762	75.558	77.2968			0	-1.5247	0.69071	19.6025	28.8068	35.616	46.0686	48.6805	46.1083	45.9839	49.1979	56.0546	56.1455	62.7938	77.2638	74.6456	76.3844
22	-0.59504	-0.6123	2.06351	20.5149	33.3407	55.1499	59.4229	63.2642	73.4739	73.4613	77.8211	86.927	87.4429	82.7121	89.4861	81.9287	85.4269			0	-0.01726	2.65855	21.11	33.9357	55.745	60.0179	63.8592	74.0689	74.0564	78.4162	87.522	88.038	83.3072	90.0812	82.5238	86.0219
23	0.079	3.62409	12.1249	26.2255	31.9263	50.9986	71.8414	80.8566	82.7417	79.6243	82.4845	82.9634	86.2241	80.3062	84.5164	77.7438	80.7353			0	3.54509	12.0459	26.1465	31.8473	50.9196	71.7624	80.7776	82.6627	79.5453	82.4055	82.8844	86.1451	80.2272	84.4374	77.6648	80.6563
24	4.9325	1.67831	9.70536	25.0067	33.3407	46.7796	67.6901	68.7917	74.649	73.0172	80.8256	78.9644	78.4799	73.3437	79.6203	81.2886	81.3986			0	-3.25419	4.77286	20.0741	28.4082	41.8471	62.7576	63.8592	69.7165	68.0847	75.8931	74.0319	73.5474	68.4112	74.6878	76.3561	76.4661
25	3.49058	0.97884	6.24328	22.2803	28.7052	49.8529	48.6764	54.1225	65.5495	69.4236	71.4809	79.5101	81.079	81.4577	74.8653	76.2495	78.0573			0	-2.51174	2.7527	18.7897	25.2147	46.3623	45.1858	50.6319	62.059	65.933	67.9903	76.0195	77.5884	77.9671	71.3747	72.7589	74.5667
26	9.70981	7.29486	8.86283	31.268	31.0802	52.0899	58.5277	72.5878	73.7836	82.2817	81.1697	85.8783	90.1693	92.2322	83.4771	89.0538	93.192			0	-2.41495	-0.84698	21.5582	21.3704	42.38	48.8179	62.8779	64.0738	72.5719	71.4599	76.1685	80.4594	82.5224	73.7673	79.3439	83.4822
27	13.7863	19.3708	23.0299	27.5577	39.4562	61.586	59.4229	72.4752	79.3888	78.9152	82.7908	87.0632	88.0482	90.5598	89.4861	86.1913	89.8256			0	5.58446	9.24354	13.7714	25.6699	47.7996	45.6365	58.6889	65.6025	65.1289	69.0045	73.2769	74.2618	76.7734	75.6998	72.405	76.0392
28	17.543	22.5863	23.8445	32.1317	35.678	51.5012	54.983	64.2692	78.8632	79.1019	78.3237	81.9913	83.258	83.56	84.2917	86.7631	85.74			0	5.04325	6.30142	14.5886	18.135	33.9582	37.4399	46.7262	61.3201	61.5588	60.7807	64.4483	65.715	66.017	66.7487	69.2201	68.1969
29	16.8229	14.4562	24.0774	27.419	35.1883	51.6114	64.7163	57.358	77.2981	82.4955	78.6059	84.4584	90.1693	87.1432	86.8836	89.0538	87.978			0	-2.36674	7.25444	10.5961	18.3654	34.7885	47.8934	40.5351	60.4752	65.6726	61.783	67.6355	73.3463	70.3203	70.0607	72.2308	71.155
30	-0.59504	-10.9171	-0.59949	7.79057	10.9606	27.3044	44.4915	71.8251	74.2277	76.2727	79.0303	82.8569	84.4587	89.0523	89.4861	93.8174	89.8256			0	-10.3221	-0.00445	8.38561	11.5556	27.8995	45.0865	72.4201	74.8227	76.8677	79.6254	83.4519	85.0537	89.6474	90.0812	94.4124	90.4206
31	-1.78853	-0.6123	8.14667	14.2813	27.5479	36.5284	56.5862	75.793	72.8191	84.437	84.7214	84.3985	90.1693	89.0523	84.2917	92.2336	87.223			0	1.17623	9.9352	16.0699	29.3364	38.3169	58.3748	77.5815	74.6076	86.2255	86.51	86.187	91.9578	90.8409	86.0802	94.0221	89.0115
32	6.31619	12.6282	12.3951	22.8591	44.6506	61.048	72.1375	82.7042	78.0783	82.8248	82.7908	87.2367	83.0442	86.6664	84.5164	84.8174	86.9632			0	6.31203	6.07894	16.5429	38.3345	54.7318	65.8213	76.388	71.7622	76.5086	76.4747	80.9205	76.728	80.3502	78.2002	78.5012	80.647
33	-4.28643	-13.1411	-0.59949	9.96532	22.4843	37.8157	51.9229	55.1341	67.5532	77.7174	75.1723	79.1066	78.8593	82.8822	82.3611	79.5914	71.3906			0	-8.85468	3.68694	14.2518	26.7707	42.1021	56.2093	59.4205	71.8397	82.0038	79.4587	83.393	83.1458	87.1686	86.6476	83.8779	75.6771
34	11.2936	9.69255	11.9293	29.4053	31.9263	41.292	64.7163	67.6629	78.8632	81.8121	84.9461	87.5403	83.4594	80.0797	81.356	76.2495	69.5024			0	-1.60107	0.6357	18.1117	20.6327	29.9984	53.4227	56.3693	67.5696	70.5185	73.6525	76.2467	72.1658	68.7861	70.0624	64.9559	58.2088
35	8.86728	6.51272	12.641	22.8591	33.3407	44.6585	59.0259	56.1392	73.2456	82.2817	77.6511	81.8474	82.5746	79.1865	84.9122	85.4774	82.4732			0	-2.35456	3.77375	13.9918	24.4734	35.7912	50.1587	47.2719	64.3783	73.4144	68.7838	72.9801	73.7073	70.3193	76.045	76.6102	73.6059
36	-3.38774	2.56753	3.3457	13.1562	18.0856	27.417	31.099	49.7283	63.608	72.7075	76.7818	74.9361	85.7706	86.326	83.7756	82.7136	76.5851			0	5.95527	6.73344	16.5439	21.4733	30.8047	34.4867	53.1161	66.9958	76.0952	80.1696	78.3239	89.1583	89.7138	87.1633	86.1013	79.9728
37	8.44444	6.81911	11.9293	18.0954	22.4843	32.3937	52.6216	68.7917	72.3542	75.7797	70.4758	73.9039	64.9681	78.0983	71.0512	72.6642	81.2948			0	-1.62533	3.48488	9.65098	14.0398	23.9492	44.1771	60.3473	63.9098	67.3353	62.0314	65.4595	56.5237	69.6538	62.6068	64.2198	72.8504
38	-0.59504	-0.6123	5.40952	14.0812	10.9606	16.7612	33.1815	42.9816	56.483	65.978	44.9159	62.4073	67.3356	81.4577	68.9301	75.0175	69.6007			0	-0.01726	6.00456	14.6763	11.5556	17.3562	33.7766	43.5766	57.0781	66.5731	45.5109	63.0024	67.9306	82.0527	69.5251	75.6126	70.1958
39	4.04042	7.5178	8.86283	22.4941	22.8492	34.3536	53.1071	51.1694	67.3394	75.3705	83.3339	85.8783	93.9833	84.9667	84.7225	84.084	80.3633			0	3.47738	4.82241	18.4537	18.8088	30.3132	49.0667	47.129	63.299	71.3301	79.2935	81.8379	89.9429	80.9263	80.6821	80.0436	76.3228
tir1-1 afb1-3	0	30	60	90	120	150	180	210	240	270	300	330	360	390	420	450	480		tir1-1 afb1-3	0	30	60	90	120	150	180	210	240	270	300	330	360	390	420	450	480
mean ∠ from hori	8.00656	8.20084	12.8681	20.149	30.4014	43.6377	56.078	68.6261	74.997	79.7112	82.1526	84.8156	86.5908	86.4916	86.8665	86.1121	86.5678		mean ∠ from hori	0	0.194274	4.86155	12.1425	22.3948	35.6311	48.0714	60.6195	66.9904	71.7046	74.1461	76.809	78.5842	78.485	78.86	78.1055	78.5613
STDEV	8.78934	8.96129	10.3107	10.8618	14.3369	14.6439	14.8005	15.1169	11.8825	11.3232	11.1369	9.75653	10.0306	8.58535	7.59478	7.89541	8.37084		STDEV	0	4.26736	5.98163	8.78947	12.148	12.7573	14.4154	14.8215	11.9272	10.8131	10.8988	10.1841	10.5511	10.153	8.67389	9.53878	9.59434
n	40	40	40	40	40	40	40	40	40	40	40	40	40	40	40	40	40		n	40	40	40	40	40	40	40	40	40	40	40	40	40	40	40	40	40
SE	1.38972	1.4169	1.63027	1.71739	2.26686	2.3154	2.34016	2.3902	1.87879	1.79036	1.7609	1.54264	1.58598	1.35746	1.20084	1.24837	1.32355		SE	0	0.674729	0.945778	1.38974	1.92077	2.01711	2.27927	2.34348	1.88586	1.7097	1.72326	1.61024	1.66827	1.60533	1.37146	1.50821	1.517
TTEST (tir1)	0.215425	0.529738	0.557865	0.0177396	0.112267	0.20217	0.374459	0.892714	0.772904	0.158764	0.0460016	0.0329154	0.0616688	0.0854908	0.00996237	0.0230101	0.00482512		TTEST (tir1)		0.323799	0.0178146	9.21054e-05	0.0086407	0.0214913	0.0820271	0.400737	0.488339	0.633643	0.292093	0.355107	0.464007	0.763677	0.303535	0.500746	0.17293
TTEST (tir1)	0.306709	0.69576	0.492477	0.0177027	0.102281	0.173796	0.365252	0.883129	0.861269	0.191975	0.0541352	0.043889	0.0748667	0.103013	0.0155839	0.0307963	0.00623961		TTEST (afb1)		0.0626716	0.0219196	0.00320814	0.00149389	0.00710292	0.0239022	0.466974	0.330443	0.733503	0.805693	0.813984	0.624903	0.904083	0.674924	0.236417	0.384241
1	-25.9065	-28.6105	-31.3287	-36.2538	-47.1211	-59.5345	-64.9831	-70.56	-81.2538	-84.5597	-83.6598	-90	-92.2906	-92.7263	-96.3402	-95.0425	-92.3859
2	-19.9831	-18.435	-21.0375	-22.6199	-53.9726	-56.3099	-67.1663	-83.1572	-84.2894	-86.0548	-95.9061	-99.4623	-99.4623	-103.392	-101.768	-109.44	-105.945
3	-6.70984	-10.6197	-9.21103	-15.5241	-31.6075	-47.1211	-70.71	-79.8753	-82.875	-90	-92.0454	-93.9452	-90	-87.7974	-85.4261	-84.8056	-85.0303
4	6.63251	2.72631	0	-9.46232	-14.0362	-47.4896	-57.9946	-70.0169	-70.9065	-75.9638	-81.8699	-84.9575	-81.0274	-81.8699	-77.9052	-78.6901	-78.6901
5	6.20345	13.2405	14.6209	9.46232	0	-11.3099	-30.9638	-33.2749	-49.8991	-56.3099	-54.1624	-65.3764	-62.1027	-74.7449	-74.7449	-75.9638	-78.2317
6	1.21888	-9.46232	-21.5014	-23.6294	-49.3987	-65.556	-70.821	-86.1859	-77.0054	-87.2737	-88.0251	-90	-98.1301	-94.5739	-95.1944	-96.3402	-88.0251
7	-15.5241	-12.5288	-20.3231	-23.6294	-58.3925	-70.0169	-84.5597	-91.9091	-96.8428	-108.435	-105.945	-108.435	-106.699	-106.39	-97.4314	-98.9726	-98.5308
8	-3.81407	-3.57633	-11.7683	-20.556	-48.0128	-53.1301	-65.7722	-86.4237	-90	-90	-87.0643	-95.4403	-90	-93.0128	-88.0909	-90	-96.7098
9	1.63658	-5.44033	-10.3049	-17.5256	-26.565	-31.6075	-57.9946	-75.2564	-79.2157	-86.4237	-85.6013	-90	-90	-90	-90	-88.2643	-85.6013
10	-6.78897	-10.3049	-18.435	-34.992	-41.9872	-61.2602	-79.6951	-82.875	-86.7295	-90	-86.9872	-91.7899	-90	-90	-90	-87.5105	-87.3974
11	-14.0362	-16.6992	-19.179	-15.9454	-23.9625	-30.5792	-49.0856	-64.6538	-73.3008	-84.8056	-68.1986	-68.1986	-71.565	-69.444	-68.9625	-71.565	-72.646
12	-1.24536	-5.19443	-2.38594	-4.39871	-10.008	-23.1986	-35.5377	-30.9638	-45	-51.3402	-58.5704	-64.7989	-76.5043	-72.4744	-77.1957	-80.5377	-78.6901
13	1.84761	0	0	-4.76364	-6.00901	-22.3801	-30.9638	-31.6075	-47.1211	-55.3049	-64.359	-72.7585	-69.6769	-75.2564	-77.6609	-72.646	-70.0169
14	5.71059	5.71059	2.2026	-3.01279	-21.8014	-32.9052	-35.8376	-46.7357	-61.9275	-64.6538	-60.9454	-68.6294	-65.0952	-74.7449	-74.4759	-83.4802	-87.3974
15	-25.3462	-23.1986	-36.4692	-39.8056	-50.5275	-76.5043	-87.6141	-86.8202	-90	-96.3402	-93.0941	-96.9112	-93.6914	-94.9697	-95.7106	-98.7462	-96.8428
16	0	0	-15.2551	-22.8336	-30.4655	-42.7094	-53.1301	-77.4712	-75.2564	-79.2157	-78.4078	-86.3086	-86.0548	-90	-88.3153	-88.0251	-80.5377
17	-7.12502	-15.9454	-14.0362	-14.0362	-17.1027	-28.3008	-42.5104	-63.435	-65.7722	-68.7495	-69.6769	-78.2317	-78.1113	-74.3577	-77.0054	-75.2564	-69.6769
18	-11.3099	-17.6501	-20.2249	-49.3987	-57.5288	-73.3008	-86.4237	-86.9872	-92.3859	-95.4403	-101.889	-94.9697	-103.392	-95.1944	-92.6026	-93.0128	-94.7636
19	-23.1986	-17.6501	-29.3577	-33.6901	-32.6192	-58.3925	-57.0948	-72.4744	-78.6901	-80.5377	-80.5377	-84.4725	-90	-85.4261	-90	-85.9144	-86.9059
20	-5.19443	-10.8855	-14.0362	-26.565	-37.5686	-43.5312	-66.8014	-77.1957	-83.6598	-86.0548	-94.3987	-91.5482	-97.125	-93.5763	-90	-86.1859	-90
21	4.51399	1.78991	0	-21.2505	-29.7449	-42.2737	-61.3895	-77.4712	-74.9315	-80.2176	-80.1342	-81.3843	-90	-86.4237	-85.6013	-87.7974	-86.9059
22	-3.01279	-6.84277	-10.3049	-20.556	-26.565	-40.6013	-54.7824	-63.435	-65.7722	-71.565	-80.2176	-73.1416	-84.8056	-81.8699	-80.5377	-84.8056	-79.5085
23	-10.7843	-6.91123	-10.008	-18.435	-38.6598	-51.3402	-67.751	-79.1145	-82.2348	-80.9097	-80.5377	-90	-86.8202	-85.2364	-83.991	-78.1113	-82.875
24	-9.09028	-11.3099	-7.76517	-15.9454	-39.8056	-48.3665	-67.6199	-77.4712	-81.8699	-82.1467	-85.2364	-84.8056	-87.6141	-81.0274	-82.4054	-86.8202	-80.5377
25	-18.0605	-12.5288	-19.9831	-23.1986	-33.6901	-41.4237	-54.4623	-63.435	-59.7436	-72.1811	-77.7352	-82.875	-70.56	-72.1811	-74.7449	-71.565	-70.71
26	-17.1027	-22.249	-22.6199	-23.7495	-29.9816	-40.6013	-45	-71.565	-77.1957	-88.0251	-85.0303	-84.5597	-86.9872	-90	-93.9452	-94.7636	-95.4403
27	-13.3245	-15.9454	-28.0725	-28.3008	-41.1859	-45	-54.4623	-64.6538	-73.0725	-70.821	-69.1455	-71.565	-70.2011	-73.4956	-83.8845	-86.4237	-84.9575
28	-9.46232	-8.1301	-21.8014	-30.0686	-45	-55.4915	-66.0375	-87.2737	-87.6141	-91.5911	-93.8141	-95.4403	-95.4403	-95.4403	-92.9357	-85.2364	-82.875
29	-5.5722	-2.1211	-9.86581	-19.9831	-21.3706	-36.8699	-46.9749	-70.0169	-69.444	-74.7449	-75.5297	-84.2894	-85.1009	-82.4054	-83.6598	-78.2317	-79.8753
30	-5.44033	-4.39871	-9.46232	-23.4986	-26.565	-38.1572	-52.125	-72.3499	-73.3008	-76.5043	-77.0054	-85.6013	-83.991	-90	-90	-85.0303	-87.7094
31	3.90049	1.68468	-9.86581	-16.6992	-22.249	-36.8699	-48.1798	-61.9275	-72.646	-72.5528	-70.0169	-75.9638	-75.9638	-83.4802	-81.4692	-81.2538	-75.4655
32	-11.3099	-10.8855	-21.0375	-27.5528	-31.3287	-39.8056	-53.1301	-64.5366	-65.556	-74.5778	-79.3803	-83.4802	-85.3645	-92.2906	-91.9749	-90	-91.8476
33	-19.6538	-23.1986	-20.556	-23.1986	-25.2011	-45	-43.2643	-59.5345	-70.71	-81.2538	-90	-91.6366	-96.009	-90	-91.9091	-84.8056	-85.7636
34	-9.03948	-6.34019	-10.3049	-21.0375	-19.9831	-30.9638	-37.5686	-60.2551	-64.6538	-70.7693	-72.4744	-82.875	-92.2906	-87.6141	-91.5911	-90	-92.4895
35	-5.90614	0	0	0	-6.34019	-14.0362	-37.5686	-48.5763	-59.9314	-73.1416	-81.8699	-90	-88.2643	-93.9452	-92.6026	-90	-93.5763
36	-1.06091	2.1211	0	-15.4222	-18.435	-39.2894	-68.1986	-80.5377	-80.5377	-83.6598	-81.573	-85.6013	-85.6013	-82.5686	-85.4261	-90	-83.6598
37	2.7927	2.72631	-6.34019	-14.9314	-15.2551	-33.6901	-45	-59.0362	-78.6901	-76.4296	-84.8056	-90	-87.9546	-85.0303	-86.9059	-87.7974	-84.2894
38	-10.7843	-11.8887	-11.3099	-20.556	-28.0725	-40.9144	-47.4896	-66.0375	-72.4744	-84.0939	-87.7094	-94.3987	-87.8789	-93.5763	-97.125	-90	-93.8141
39	-10.8855	-7.59464	-14.0362	-22.3801	-19.6538	-37.5686	-42.7094	-73.6105	-82.6476	-87.5105	-85.4261	-93.1798	-91.7899	-90	-88.4926	-92.2906	-88.2643
40	-3.81407	-11.8887	-14.0362	-23.4986	-31.4296	-45	-53.7462	-82.875	-84.2894	-85.0303	-83.4181	-90	-90	-90	-93.6914	-93.0941	-97.3524
horizontal	0.60582	-0.26004	-0.2669	-0.33703	0.17129	0.17766	0	-0.91373	0.26083	-0.16852	0.84252	-0.86023	0.25166	-0.1718	-0.17657	-0.59859	0.51928
corrected-1	26.5123	28.3504	31.0618	35.9168	47.2924	59.7121	64.9831	69.6462	81.5147	84.3911	84.5023	89.1398	92.5423	92.5545	96.1636	94.4439	92.9052			0	1.83809	4.54946	9.40448	20.7801	33.1998	38.4708	43.1339	55.0023	57.8788	57.99	62.6274	66.0299	66.0422	69.6513	67.9315	66.3929
2	20.5889	18.1749	20.7706	22.2828	54.1439	56.4876	67.1663	82.2435	84.5502	85.8863	96.7487	98.6021	99.714	103.221	101.592	108.841	106.465			0	-2.41402	0.18168	1.6939	33.555	35.8987	46.5774	61.6546	63.9613	65.2974	76.1597	78.0132	79.1251	82.6318	81.0028	88.2525	85.8757
3	7.31566	10.3596	8.94413	15.1871	31.7788	47.2988	70.71	78.9616	83.1358	89.8315	92.8879	93.085	90.2517	87.6256	85.2495	84.207	85.5495			0	3.04396	1.62847	7.87142	24.4631	39.9831	63.3943	71.6459	75.8201	82.5158	85.5723	85.7693	82.936	80.3099	77.9339	76.8913	78.2339
4	-6.02669	-2.98635	-0.2669	9.12529	14.2075	47.6672	57.9946	69.1032	71.1673	75.7952	82.7124	84.0973	81.279	81.6981	77.7287	78.0915	79.2094			0	3.04034	5.75979	15.152	20.2342	53.6939	64.0213	75.1299	77.194	81.8219	88.7391	90.124	87.3057	87.7248	83.7554	84.1182	85.236
5	-5.59763	-13.5006	-14.8878	-9.79935	0.17129	11.4876	30.9638	32.3612	50.1599	56.1414	55.0049	64.5162	62.3544	74.5731	74.5683	75.3652	78.751			0	-7.90293	-9.29014	-4.20172	5.76892	17.0852	36.5614	37.9588	55.7576	61.739	60.6025	70.1138	67.952	80.1707	80.1659	80.9628	84.3486
6	-0.61306	9.20228	21.2345	23.2924	49.57	65.7337	70.821	85.2722	77.2662	87.1052	88.8676	89.1398	98.3818	94.4021	95.0179	95.7416	88.5443			0	9.81534	21.8476	23.9054	50.1831	66.3468	71.434	85.8853	77.8793	87.7182	89.4806	89.7528	98.9948	95.0152	95.6309	96.3547	89.1574
7	16.1299	12.2688	20.0562	23.2924	58.5638	70.1946	84.5597	90.9954	97.1036	108.266	106.788	107.575	106.951	106.218	97.2548	98.374	99.05			0	-3.86116	3.92631	7.16242	42.4339	54.0646	68.4297	74.8655	80.9737	92.1365	90.658	91.4448	90.821	90.0878	81.1249	82.2441	82.9201
8	4.41989	3.31629	11.5014	20.219	48.1841	53.3078	65.7722	85.5099	90.2608	89.8315	87.9068	94.5801	90.2517	92.841	87.9143	89.4014	97.2291			0	-1.1036	7.0815	15.7991	43.7642	48.8879	61.3524	81.0901	85.8409	85.4116	83.487	90.1602	85.8318	88.4211	83.4944	84.9815	92.8092
9	-1.03076	5.18029	10.038	17.1885	26.7363	31.7852	57.9946	74.3427	79.4765	86.2552	86.4438	89.1398	90.2517	89.8282	89.8234	87.6657	86.1206			0	6.21105	11.0687	18.2193	27.7671	32.8159	59.0254	75.3735	80.5073	87.2859	87.4746	90.1705	91.2824	90.859	90.8542	88.6965	87.1513
10	7.39479	10.0448	18.1681	34.655	42.1585	61.4379	79.6951	81.9612	86.9903	89.8315	87.8297	90.9297	90.2517	89.8282	89.8234	86.9119	87.9167			0	2.65002	10.7733	27.2602	34.7637	54.0431	72.3004	74.5665	79.5956	82.4367	80.4349	83.5349	82.8569	82.4334	82.4286	79.5171	80.5219
11	14.6421	16.4392	18.9121	15.6084	24.1338	30.7569	49.0856	63.7401	73.5616	84.6371	69.0411	67.3384	71.8167	69.2721	68.7859	70.9665	73.1653			0	1.79714	4.27005	0.96631	9.49172	16.1148	34.4436	49.098	58.9195	69.995	54.399	52.6963	57.1746	54.6301	54.1439	56.3244	58.5232
12	1.85118	4.93439	2.11904	4.06168	10.1793	23.3762	35.5377	30.05	45.2608	51.1717	59.413	63.9386	76.7559	72.3026	77.0192	79.9391	79.2094			0	3.08321	0.26786	2.2105	8.32809	21.5251	33.6865	28.1989	43.4096	49.3205	57.5618	62.0875	74.9048	70.4514	75.168	78.0879	77.3582
13	-1.24179	-0.26004	-0.2669	4.42661	6.1803	22.5578	30.9638	30.6938	47.3819	55.1363	65.2015	71.8983	69.9285	75.0846	77.4843	72.0474	70.5362			0	0.98175	0.97489	5.6684	7.42209	23.7996	32.2056	31.9356	48.6237	56.3781	66.4433	73.1401	71.1703	76.3264	78.7261	73.2892	71.778
14	-5.10477	-5.97063	-2.4695	2.67576	21.9727	33.0829	35.8376	45.822	62.1883	64.4853	61.7879	67.7691	65.3469	74.5731	74.2993	82.8816	87.9167			0	-0.86586	2.63527	7.78053	27.0775	38.1877	40.9424	50.9267	67.2931	69.5901	66.8927	72.8739	70.4517	79.6778	79.4041	87.9864	93.0215
15	25.952	22.9385	36.2023	39.4685	50.6988	76.6819	87.6141	85.9064	90.2608	96.1717	93.9366	96.051	93.943	94.7979	95.534	98.1476	97.362			0	-3.01345	10.2503	13.5165	24.7468	50.7299	61.6621	59.9544	64.3088	70.2197	67.9846	70.099	67.9911	68.8459	69.582	72.1956	71.41
16	0.60582	-0.26004	14.9882	22.4966	30.6368	42.8871	53.1301	76.5575	75.5173	79.0472	79.2503	85.4484	86.3065	89.8282	88.1388	87.4265	81.057			0	-0.86586	14.3824	21.8908	30.031	42.2812	52.5243	75.9516	74.9115	78.4414	78.6445	84.8426	85.7007	89.2224	87.5329	86.8207	80.4511
17	7.73084	15.6854	13.7693	13.6992	17.274	28.4784	42.5104	62.5212	66.0331	68.581	70.5194	77.3715	78.363	74.1859	76.8288	74.6578	70.1961			0	7.95452	6.0385	5.96837	9.54318	20.7476	34.7796	54.7904	58.3022	60.8501	62.7885	69.6406	70.6322	66.4551	69.098	66.927	62.4653
18	11.9157	17.3901	19.958	49.0617	57.7001	73.4784	86.4237	86.0735	92.6468	95.2718	102.731	94.1095	103.644	95.0226	92.426	92.4142	95.2829			0	5.47433	8.04221	37.1459	45.7844	61.5627	74.5079	74.1577	80.731	83.3561	90.8154	82.1938	91.7284	83.1069	80.5102	80.4984	83.3672
19	23.8044	17.3901	29.0908	33.353	32.7905	58.5702	57.0948	71.5607	78.9509	80.3692	81.3802	83.6122	90.2517	85.2543	89.8234	85.3158	87.4252			0	-6.41433	5.28644	9.54863	8.98612	34.7657	33.2904	47.7563	55.1465	56.5647	57.5758	59.8078	66.4472	61.4499	66.019	61.5114	63.6208
20	5.80025	10.6255	13.7693	26.228	37.7399	43.7089	66.8014	76.282	83.9206	85.8863	95.2412	90.6879	97.3767	93.4045	89.8234	85.5873	90.5193			0	4.82524	7.96909	20.4278	31.9396	37.9086	61.0012	70.4817	78.1204	80.086	89.441	84.8877	91.5764	87.6043	84.0232	79.7871	84.719
21	-3.90817	-2.04995	-0.2669	20.9135	29.9162	42.4514	61.3895	76.5575	75.1923	80.0491	80.9767	80.5241	90.2517	86.2519	85.4247	87.1988	87.4252			0	1.85822	3.64127	24.8216	33.8243	46.3595	65.2977	80.4656	79.1005	83.9572	84.8849	84.4323	94.1598	90.16	89.3329	91.107	91.3334
22	3.61861	6.58273	10.038	20.219	26.7363	40.779	54.7824	62.5212	66.0331	71.3965	81.0601	72.2814	85.0572	81.6981	80.3611	84.207	80.0278			0	2.96412	6.41934	16.6004	23.1177	37.1603	51.1638	58.9026	62.4145	67.7779	77.4415	68.6628	81.4386	78.0795	76.7425	80.5884	76.4092
23	11.3901	6.65119	9.74108	18.0979	38.8311	51.5179	67.751	78.2007	82.4957	80.7412	81.3802	89.1398	87.0718	85.0646	83.8144	77.5127	83.3943			0	-4.73893	-1.64904	6.7078	27.441	40.1277	56.3609	66.8106	71.1055	69.3511	69.9901	77.7497	75.6817	73.6744	72.4243	66.1226	72.0041
24	9.6961	11.0499	7.49827	15.6084	39.9769	48.5441	67.6199	76.5575	82.1307	81.9782	86.0789	83.9453	87.8657	80.8556	82.2288	86.2216	81.057			0	1.35379	-2.19783	5.91227	30.2808	38.848	57.9238	66.8614	72.4346	72.2821	76.3828	74.2492	78.1696	71.1595	72.5327	76.5255	71.3609
25	18.6663	12.2688	19.7162	22.8616	33.8614	41.6013	54.4623	62.5212	60.0044	72.0126	78.5777	82.0147	70.8116	72.0093	74.5683	70.9665	71.2292			0	-6.39752	1.04992	4.19527	15.1951	22.935	35.796	43.8549	41.3381	53.3463	59.9115	63.3485	52.1453	53.343	55.902	52.3002	52.5629
26	17.7086	21.989	22.353	23.4125	30.1529	40.779	45	70.6513	77.4566	87.8565	85.8728	83.6994	87.2389	89.8282	93.7686	94.165	95.9596			0	4.28043	4.64441	5.70391	12.4444	23.0704	27.2914	52.9428	59.748	70.148	68.1642	65.9909	69.5303	72.1196	76.0601	76.4565	78.2511
27	13.9303	15.6854	27.8056	27.9637	41.3572	45.1777	54.4623	63.7401	73.3333	70.6525	69.9881	70.7048	70.4528	73.3238	83.7079	85.8251	85.4768			0	1.75501	13.8752	14.0334	27.4269	31.2473	40.532	49.8097	59.403	56.7221	56.0577	56.7745	56.5224	59.3935	69.7776	71.8947	71.5465
28	10.0681	7.87006	21.5345	29.7316	45.1713	55.6691	66.0375	86.36	87.8749	91.4226	94.6566	94.5801	95.692	95.2685	92.7591	84.6378	83.3943			0	-2.19808	11.4664	19.6634	35.1031	45.601	55.9694	76.2918	77.8067	81.3545	84.5884	84.512	85.6239	85.2004	82.691	74.5696	73.3261
29	6.17802	1.86106	9.59891	19.6461	21.5419	37.0476	46.9749	69.1032	69.7048	74.5764	76.3722	83.4292	85.3526	82.2336	83.4832	77.6331	80.3946			0	-4.31696	3.42089	13.4681	15.3639	30.8695	40.7969	62.9251	63.5268	68.3983	70.1942	77.2512	79.1745	76.0555	77.3052	71.4551	74.2166
30	6.04615	4.13867	9.19542	23.1615	26.7363	38.3349	52.125	71.4361	73.5616	76.3358	77.8479	84.7411	84.2426	89.8282	89.8234	84.4317	88.2287			0	-1.90748	3.14927	17.1154	20.6902	32.2887	46.0789	65.39	67.5154	70.2896	71.8017	78.6949	78.1965	83.782	83.7773	78.3855	82.1825
31	-3.29467	-1.94472	9.59891	16.3622	22.4203	37.0476	48.1798	61.0138	72.9068	72.3843	70.8594	75.1035	76.2154	83.3084	81.2927	80.6552	75.9848			0	1.34995	12.8936	19.6569	25.715	40.3422	51.4745	64.3084	76.2015	75.679	74.1541	78.3982	79.5101	86.6031	84.5873	83.9499	79.2795
32	11.9157	10.6255	20.7706	27.2158	31.5	39.9832	53.1301	63.6229	65.8169	74.4093	80.2229	82.62	85.6162	92.1188	91.7984	89.4014	92.3669			0	-1.29026	8.85486	15.3	19.5842	28.0675	41.2143	51.7072	53.9011	62.4936	68.3071	70.7042	73.7005	80.2031	79.8826	77.4857	80.4511
33	20.2596	22.9385	20.2891	22.8616	25.3724	45.1777	43.2643	58.6207	70.9708	81.0853	90.8425	90.7763	96.2607	89.8282	91.7326	84.207	86.2829			0	2.67891	0.02951	2.60192	5.11277	24.918	23.0047	38.3611	50.7111	60.8257	70.5829	70.5167	76.001	69.5686	71.4729	63.9473	66.0232
34	9.6453	6.08015	10.038	20.7005	20.1544	31.1414	37.5686	59.3414	64.9146	70.6008	73.3169	82.0147	92.5423	87.4423	91.4146	89.4014	93.0088			0	-3.56515	0.39265	11.0552	10.5091	21.4961	27.9233	49.6961	55.2693	60.9555	63.6716	72.3695	82.897	77.797	81.7693	79.7561	83.3635
35	6.51196	-0.26004	-0.2669	-0.33703	6.51148	14.2139	37.5686	47.6626	60.1923	72.9731	82.7124	89.1398	88.516	93.7734	92.426	89.4014	94.0956			0	-6.772	-6.77886	-6.84899	-0.00048	7.70194	31.0566	41.1506	53.6803	66.4611	76.2005	82.6278	82.004	87.2614	85.914	82.8894	87.5836
36	1.66673	-2.38114	-0.2669	15.0851	18.6062	39.4671	68.1986	79.6239	80.7985	83.4913	82.4155	84.7411	85.853	82.3968	85.2495	89.4014	84.1791			0	-4.04787	-1.93363	13.4184	16.9395	37.8003	66.5319	77.9572	79.1318	81.8246	80.7488	83.0743	84.1862	80.7301	83.5828	87.7347	82.5124
37	-2.18688	-2.98635	6.07329	14.5944	15.4264	33.8677	45	58.1225	78.9509	76.261	85.6481	89.1398	88.2062	84.8585	86.7294	87.1988	84.8087			0	-0.79947	8.26017	16.7813	17.6133	36.0546	47.1869	60.3094	81.1378	78.4479	87.835	91.3267	90.3931	87.0453	88.9163	89.3857	86.9956
38	11.3901	11.6286	11.043	20.219	28.2438	41.092	47.4896	65.1238	72.7353	83.9253	88.5519	93.5385	88.1306	93.4045	96.9485	89.4014	94.3333			0	0.2385	-0.34709	8.8289	16.8537	29.7019	36.0994	53.7337	61.3451	72.5352	77.1618	82.1484	76.7404	82.0144	85.5583	78.0113	82.9432
39	11.4913	7.3346	13.7693	22.0431	19.8251	37.7463	42.7094	72.6967	82.9085	87.3419	86.2686	92.3196	92.0416	89.8282	88.316	91.692	88.7836			0	-4.15675	2.27799	10.5518	8.33376	26.2549	31.218	61.2054	71.4171	75.8506	74.7772	80.8282	80.5502	78.3368	76.8246	80.2007	77.2922
40	4.41989	11.6286	13.7693	23.1615	31.6009	45.1777	53.7462	81.9612	84.5502	84.8617	84.2606	89.1398	90.2517	89.8282	93.5148	92.4955	97.8717			0	7.20873	9.34945	18.7416	27.181	40.7578	49.3263	77.5414	80.1304	80.4419	79.8407	84.7199	85.8318	85.4083	89.0949	88.0756	93.4518
tir1afb345	0	30	60	90	120	150	180	210	240	270	300	330	360	390	420	450	480		tir1afb345	0	30	60	90	120	150	180	210	240	270	300	330	360	390	420	450	480
mean ∠ from hori	6.65377	8.99337	17.35	26.0923	34.9526	46.87	54.2341	61.9993	63.2088	64.5984	65.432	70.2819	70.649	73.6479	73.9875	74.9424	73.7699		mean ∠ from hori	0	2.33961	10.6962	19.4386	28.2988	40.2163	47.5804	55.3455	56.555	57.9447	58.7782	63.6282	63.9953	66.9942	67.3337	68.2886	67.1161
STDEV	9.29318	10.0776	11.9889	13.0847	13.5699	15.8642	15.8423	15.5178	14.0261	13.1803	12.853	13.0914	10.669	10.4213	9.48837	8.69113	10.0139		STDEV	0	3.77965	7.98631	8.54126	8.76575	10.0615	10.6375	11.3258	9.12837	9.17318	8.241	8.35512	7.82478	7.6598	8.11705	6.48185	8.02275
n	42	42	42	42	42	42	42	42	42	42	42	42	42	42	42	42	42		n	42	42	42	42	42	42	42	42	42	42	42	42	42	42	42	42	42
SE	1.43397	1.55501	1.84993	2.01901	2.09388	2.4479	2.44452	2.39445	2.16427	2.03377	1.98327	2.02005	1.64626	1.60804	1.46409	1.34107	1.54518		SE	0	0.583212	1.23231	1.31795	1.35259	1.55252	1.6414	1.74762	1.40854	1.41545	1.27161	1.28922	1.20739	1.18193	1.25249	1.00017	1.23794
TTEST (Col)	0.0200726	0.109946	0.261548	0.335696	0.0569028	0.0338294	0.00113806	0.00801601	0.000480263	0.000987105	0.00199326	0.00707584	0.00411193	0.00182409	0.00196261	0.000955608	0.000298131		TTEST (Col)		0.232087	0.381493	0.000429363	3.98704e-06	4.86259e-06	2.62648e-09	4.93304e-07	3.68211e-11	2.57117e-09	2.5037e-10	5.38717e-09	2.24943e-08	4.66338e-09	2.76561e-07	8.61536e-08	1.20237e-08
1	-7.59464	-10.6197	-16.6992	-32.0054	-35.2176	-53.6157	-55.4915	-63.435	-61.3895	-60.6422	-58.5704	-69.6769	-70.71	-72.8973	-79.3803	-79.3803	-81.8699
2	-1.90915	0	-9.86581	-18.435	-26.565	-39.2894	-39.8056	-52.4314	-51.7098	-62.354	-63.435	-66.8014	-67.751	-72.3499	-75.9638	-74.9315	-73.4956
3	-3.09406	-5.71059	-9.16235	-20.556	-32.0054	-47.4896	-49.6355	-67.6199	-74.0546	-64.44	-58.2405	-69.1455	-74.0546	-80.2176	-79.6951	-76.7595	-82.5686
4	-22.9321	-30.9638	-26.565	-41.1859	-47.4896	-60.2551	-75.0686	-74.3577	-75.9638	-71.565	-68.9625	-82.0928	-74.0546	-79.5085	-80.1342	-81.8699	-79.6951
5	-1.59114	-3.17983	-8.74616	-23.9625	-30.9638	-42.8789	-56.3099	-68.9625	-61.5571	-59.4208	-61.5571	-67.0679	-66.3706	-79.1145	-73.3008	-75.2564	-70.821
6	1.36393	2.86241	-12.9946	-14.9314	-24.2278	-39.4725	-58.5704	-74.5778	-63.435	-74.0546	-69.2278	-76.373	-77.4712	-81.3843	-81.2538	-80.2176	-78.2317
7	-7.12502	-11.8887	-10.7843	-16.2602	-24.444	-42.2737	-47.1211	-62.2415	-60.6422	-61.5571	-65.0952	-77.2756	-65.3764	-73.6105	-74.0546	-74.3577	-76.6075
8	1.04163	0	-23.6294	-26.565	-33.6901	-45	-50.9061	-74.0546	-66.3706	-65.6954	-66.0375	-76.9081	-73.0725	-72.3499	-76.7595	-77.7352	-73.7398
9	0	0	-6.34019	-9.78241	-21.8014	-34.992	-36.8699	-45	-47.4896	-49.3987	-43.3634	-60.2551	-57.7244	-62.5924	-59.0362	-57.5288	-59.7436
10	-9.78241	-12.0948	-34.6951	-39.2894	-36.2538	-59.0362	-70.0169	-81.8699	-74.7449	-78.6901	-78.2317	-85.486	-83.2902	-84.2894	-84.8056	-84.2894	-85.0303
11	-3.50353	-9.46232	-26.565	-31.6075	-37.5686	-50.1944	-66.3706	-70.0169	-62.1027	-67.8337	-64.7989	-68.8387	-59.5345	-59.7436	-61.6992	-70.56	-59.4208
12	-10.1755	-17.354	-25.2011	-33.6901	-34.5085	-53.1301	-67.6199	-74.4759	-70.0169	-70.56	-66.3706	-77.6609	-76.7595	-84.2894	-80.5377	-81.8699	-86.8202
13	-1.59114	-6.00901	-19.9831	-28.3008	-35.5377	-54.4623	-66.0375	-73.7398	-69.1455	-80.5377	-74.0546	-81.573	-82.5686	-86.1859	-83.6598	-84.8056	-82.4054
14	32.0054	15.9454	10.7843	7.59464	-3.01279	2.2026	2.38594	-8.1301	-6.34019	-15.6423	-12.5288	-16.6992	-22.8336	-25.3462	-41.6335	-40.2364	-34.6951
15	5.35583	6.34019	2.48955	-4.08562	-14.0362	-21.8014	-34.8245	-49.3987	-55.3049	-59.9314	-60.2551	-60.5241	-63.435	-70.71	-77.4712	-75.0686	-75.4655
16	1.63658	-2.48955	-5.71059	-14.0362	-21.0375	-28.1786	-32.7352	-48.8141	-46.7357	-59.9314	-51.3402	-60.5241	-63.435	-65.2249	-66.0375	-71.565	-68.5523
17	4.08562	6.70984	-2.04541	-19.0935	-15.2551	-21.8014	-40.3645	-36.8699	-50.1944	-48.3665	-48.0128	-49.0856	-55.3049	-59.4208	-64.5366	-70.56	-74.5778
18	-10.1247	-20.8545	-45	-43.6678	-49.7636	-67.6199	-66.2505	-77.4712	-78.6901	-75.9638	-72.8973	-80.5377	-77.0054	-81.573	-76.6075	-73.4956	-67.0679
19	-7.59464	-16.2602	-28.6105	-30.6507	-35.2176	-54.7824	-54.8658	-62.1027	-66.8014	-63.435	-64.29	-74.7449	-74.4759	-74.9315	-74.4759	-74.0546	-72.3499
20	-19.9831	-26.565	-38.1572	-41.1859	-47.2906	-60.9454	-62.4472	-62.5256	-64.2307	-72.1811	-72.8973	-72.7585	-73.6105	-73.4956	-70.71	-78.6901	-72.1811
21	-8.42697	-14.0362	-22.4794	-45	-36.8699	-45	-52.5946	-64.5366	-59.9314	-68.6294	-67.751	-76.7595	-73.0725	-69.444	-74.4759	-79.3803	-74.7449
22	-20.8545	-25.3462	-36.8699	-57.0948	-65.7722	-73.6105	-78.1113	-82.2348	-83.991	-85.0303	-84.9204	-87.9546	-88.0251	-85.4261	-87.9546	-90	-88.2643
23	-9.46232	-9.09028	-17.6501	-29.0546	-27.8973	-42.5104	-46.8476	-50.7106	-66.5014	-57.3808	-72.7585	-72.646	-72.3499	-75.4655	-75.9638	-79.5085	-78.2317
24	-10.8855	-12.9946	-9.86581	-18.435	-22.6199	-48.8141	-43.3634	-51.8428	-49.8991	-50.7106	-67.6199	-59.0362	-61.3895	-69.444	-71.565	-78.6901	-74.0546
25	-6.34019	-9.46232	-17.354	-38.1572	-47.2906	-66.0375	-73.6105	-75.4655	-71.565	-71.565	-69.2278	-69.6769	-72.4744	-74.7449	-77.4712	-74.3577	-75.9638
26	-19.44	-22.3801	-20.556	-32.9052	-45	-45	-53.9726	-66.3706	-64.6538	-64.7989	-68.1986	-75.0686	-67.6199	-76.6075	-75.9638	-77.4712	-76.7595
27	-3.69139	-6.58194	-12.2648	-34.6951	-43.1524	-45	-64.7989	-63.435	-63.435	-60.0184	-71.565	-67.1663	-72.4744	-77.4712	-78.1113	-76.373	-78.1113
28	-15.9454	-20.3231	-34.5923	-45	-64.9831	-71.565	-71.565	-78.0239	-68.1986	-78.6901	-74.4759	-75.1735	-72.7585	-75.4655	-82.875	-86.3086	-77.2756
29	-15.4222	-18.435	-21.0375	-28.8108	-39.0939	-57.9946	-53.1301	-66.0375	-64.9831	-65.2249	-68.9625	-72.646	-72.3499	-72.7585	-75.9638	-73.4956	-76.5043
30	-20.3231	-27.8973	-32.4712	-35.8376	-45	-57.9946	-65.556	-76.7595	-76.866	-87.1376	-78.6901	-85.9144	-77.9052	-82.4054	-79.5085	-83.4181	-82.875
31	-9.46232	-10.8855	-25.2011	-27.646	-39.4725	-59.0362	-68.1986	-78.6901	-65.556	-74.0546	-67.8337	-74.3577	-75.9638	-80.8376	-81.8699	-81.4692	-81.0274
32	-8.97263	-12.5288	-17.5256	-17.1027	-40.9144	-49.7636	-59.7436	-64.7989	-72.646	-73.0725	-69.2278	-82.6476	-77.1957	-75.3791	-78.6901	-79.992	-71.565
33	-5.71059	-9.46232	-25.2011	-26.565	-34.3803	-53.9726	-58.2405	-68.6294	-69.444	-73.7398	-73.7398	-75.4655	-76.5043	-75.0686	-77.9052	-78.6901	-63.435
34	-10.008	-16.9275	-29.4759	-34.992	-47.4896	-64.5366	-66.0375	-71.565	-74.7449	-68.1986	-77.0054	-79.6951	-69.6769	-75.9638	-79.3803	-74.7449	-74.0546
35	-7.69605	-5.71059	-13.5704	-11.3099	-25.0169	-40.6013	-48.3665	-59.9314	-62.354	-63.435	-70.3462	-77.9052	-76.6075	-83.8845	-84.2894	-83.1572	-85.9144
36	-1.36393	0	-6.34019	-10.3049	-19.44	-36.8699	-46.6366	-49.0856	-52.125	-42.1376	-51.8428	-55.6197	-75.9638	-71.565	-58.3925	-59.4208	-53.9726
37	2.60256	4.23639	3.69139	-4.23639	-5.71059	-5.44033	-19.6538	-30.5792	-30.9638	-46.273	-41.6335	-43.8309	-55.4915	-66.3706	-49.7636	-63.435	-57.3808
38	-3.81407	-10.1247	-25.0169	-34.6951	-39.2894	-47.7263	-56.3099	-74.7449	-73.7398	-75.0686	-84.2894	-80.5377	-78.6901	-78.3106	-75.9638	-71.565	-73.3008
39	-12.2648	-15.2551	-29.3577	-34.992	-47.2906	-55.008	-74.4759	-83.1572	-84.2894	-90	-83.4181	-90	-87.1376	-88.0909	-86.8202	-85.0303	-81.2538
40	-7.12502	-12.9946	-20.2249	-23.9625	-48.0128	-53.9726	-61.6992	-53.7462	-62.2415	-63.435	-62.1027	-63.435	-69.7751	-84.0939	-81.8699	-78.1113	-82.5686
41	-12.5288	-15.9454	-17.354	-33.6901	-48.8141	-61.3895	-61.6992	-67.1663	-74.7449	-69.444	-64.6538	-71.565	-69.1455	-80.5377	-67.3801	-83.6598	-79.8753
42	-3.69139	-4.08562	-12.8043	-15.2551	-28.6105	-33.6901	-39.2894	-39.4007	-51.3402	-61.9275	-65.0952	-69.1455	-73.3008	-81.4692	-75.9638	-81.2538	-77.9052
horizontal	0.16951	-0.95484	-1.24536	-0.60858	0	-0.52403	-0.35698	-0.97704	0.08655	-0.9295	-0.17575	-0.67702	-0.17739	-1.1149	-0.7719	-1.31389	-0.52483
corrected-1	7.76415	9.66482	15.4539	31.3968	35.2176	53.0916	55.1345	62.4579	61.4761	59.7127	58.3947	68.9998	70.5326	71.7824	78.6084	78.0665	81.3451			0	1.90067	7.68973	23.6327	27.4534	45.3275	47.3704	54.6938	53.7119	51.9486	50.6305	61.2357	62.7684	64.0182	70.8443	70.3023	73.5809
2	2.07866	-0.95484	8.62045	17.8264	26.565	38.7654	39.4486	51.4544	51.7964	61.4245	63.2592	66.1244	67.5736	71.235	75.1919	73.6176	72.9708			0	-3.0335	6.54179	15.7477	24.4864	36.6867	37.3699	49.3757	49.7177	59.3459	61.1805	64.0457	65.4949	69.1563	73.1132	71.539	70.8922
3	3.26357	4.75575	7.91699	19.9475	32.0054	46.9655	49.2785	66.6428	74.1411	63.5105	58.0648	68.4685	73.8772	79.1027	78.9232	75.4456	82.0438			0	1.49218	4.65342	16.6839	28.7418	43.7019	46.0149	63.3792	70.8776	60.247	54.8012	65.2049	70.6136	75.8391	75.6597	72.182	78.7802
4	23.1016	30.0089	25.3197	40.5773	47.4896	59.7311	74.7116	73.3807	76.0503	70.6355	68.7867	81.4158	73.8772	78.3936	79.3623	80.556	79.1703			0	6.90731	2.21808	17.4757	24.3879	36.6295	51.61	50.2791	52.9487	47.5339	45.6851	58.3142	50.7756	55.292	56.2607	57.4544	56.0687
5	1.76065	2.22499	7.5008	23.3539	30.9638	42.3549	55.953	67.9855	61.6436	58.4913	61.3813	66.3909	66.1932	77.9996	72.5289	73.9425	70.2962			0	0.46434	5.74015	21.5933	29.2031	40.5942	54.1923	66.2248	59.883	56.7306	59.6207	64.6302	64.4326	76.2389	70.7682	72.1819	68.5355
6	-1.19442	-3.81725	11.7493	14.3228	24.2278	38.9484	58.2135	73.6008	63.5215	73.1251	69.052	75.696	77.2938	80.2694	80.4819	78.9037	77.7069			0	-2.62283	12.9437	15.5173	25.4222	40.1428	59.4079	74.7952	64.7159	74.3195	70.2464	76.8904	78.4882	81.4639	81.6764	80.0981	78.9013
7	7.29453	10.9338	9.53894	15.6516	24.444	41.7497	46.7641	61.2644	60.7288	60.6276	64.9195	76.5986	65.199	72.4956	73.2827	73.0439	76.0827			0	3.63929	2.24441	8.35709	17.1494	34.4551	39.4696	53.9699	53.4343	53.333	57.625	69.3041	57.9045	65.201	65.9882	65.7493	68.7881
8	-0.87212	-0.95484	22.384	25.9565	33.6901	44.476	50.5492	73.0776	66.4572	64.7659	65.8618	76.2311	72.8951	71.235	75.9876	76.4213	73.215			0	-0.08272	23.2561	26.8286	34.5622	45.3481	51.4213	73.9497	67.3293	65.6381	66.7339	77.1032	73.7672	72.1071	76.8597	77.2935	74.0871
9	0.16951	-0.95484	5.09483	9.17383	21.8014	34.468	36.5129	44.023	47.5761	48.4692	43.1877	59.5781	57.547	61.4775	58.2643	56.2149	59.2187			0	-1.12435	4.92532	9.00432	21.6319	34.2985	36.3434	43.8534	47.4066	48.2997	43.0182	59.4086	57.3775	61.308	58.0948	56.0454	59.0492
10	9.95192	11.1399	33.4498	38.6808	36.2538	58.5122	69.6599	80.8929	74.8314	77.7606	78.056	84.809	83.1128	83.1745	84.0337	82.9755	84.5054			0	1.188	23.4979	28.7289	26.3019	48.5603	59.708	70.9409	64.8795	67.8087	68.104	74.8571	73.1608	73.2226	74.0817	73.0236	74.5535
11	3.67304	8.50748	25.3197	30.9989	37.5686	49.6704	66.0136	69.0399	62.1893	66.9042	64.6231	68.1617	59.3571	58.6287	60.9273	69.2461	58.8959			0	4.83444	21.6466	27.3259	33.8956	45.9974	62.3406	65.3668	58.5162	63.2311	60.9501	64.4887	55.684	54.9556	57.2543	65.573	55.2229
12	10.345	16.3992	23.9558	33.0815	34.5085	52.6061	67.2629	73.4989	70.1034	69.6305	66.1949	76.9839	76.5821	83.1745	79.7658	80.556	86.2953			0	6.05416	13.6107	22.7365	24.1635	42.261	56.9179	63.1538	59.7584	59.2855	55.8499	66.6389	66.2371	72.8295	69.4208	70.211	75.9503
13	1.76065	5.05417	18.7377	27.6922	35.5377	53.9383	65.6805	72.7628	69.2321	79.6082	73.8788	80.896	82.3912	85.071	82.8879	83.4917	81.8805			0	3.29352	16.9771	25.9315	33.777	52.1776	63.9199	71.0021	67.4714	77.8475	72.1182	79.1354	80.6305	83.3104	81.1273	81.731	80.1199
14	-31.8359	-16.9002	-12.0297	-8.20322	3.01279	-2.72663	-2.74292	7.15306	6.42674	14.7127	12.3531	16.0222	22.6563	24.2313	40.8616	38.9225	34.1703			0	14.9356	19.8062	23.6327	34.8487	29.1092	29.093	38.9889	38.2626	46.5486	44.1889	47.8581	54.4921	56.0672	72.6975	70.7583	66.0062
15	-5.18632	-7.29503	-3.73491	3.47704	14.0362	21.2774	34.4675	48.4217	55.3914	59.0019	60.0794	59.8471	63.2576	69.5951	76.6993	73.7547	74.9407			0	-2.10871	1.45141	8.66336	19.2226	26.4637	39.6538	53.608	60.5777	64.1882	65.2657	65.0334	68.4439	74.7814	81.8856	78.941	80.127
16	-1.46707	1.53471	4.46523	13.4277	21.0375	27.6546	32.3783	47.837	46.8223	59.0019	51.1644	59.8471	63.2576	64.11	65.2656	70.2512	68.0274			0	3.00178	5.9323	14.8947	22.5046	29.1216	33.8453	49.3041	48.2893	60.469	52.6315	61.3142	64.7246	65.577	66.7327	71.7182	69.4945
17	-3.91611	-7.66468	0.80005	18.4849	15.2551	21.2774	40.0076	35.8929	50.281	47.437	47.837	48.4086	55.1275	58.3059	63.7647	69.2461	74.053			0	-3.74857	4.71616	22.401	19.1712	25.1935	43.9237	39.809	54.1971	51.3531	51.7532	52.3247	59.0436	62.222	67.6809	73.1622	77.9691
18	10.2942	19.8996	43.7546	43.0592	49.7636	67.0958	65.8935	76.4942	78.7766	75.0343	72.7215	79.8607	76.828	80.4581	75.8356	72.1817	66.5431			0	9.60544	33.4605	32.765	39.4695	56.8017	55.5994	66.2	68.4824	64.7401	62.4273	69.5665	66.5338	70.1639	65.5414	61.8876	56.2489
19	7.76415	15.3054	27.3651	30.0421	35.2176	54.2584	54.5088	61.1257	66.888	62.5055	64.1143	74.0679	74.2985	73.8166	73.704	72.7407	71.8251			0	7.54121	19.6009	22.2779	27.4534	46.4942	46.7447	53.3615	59.1238	54.7413	56.3501	66.3037	66.5344	66.0525	65.9398	64.9766	64.0609
20	20.1526	25.6102	36.9119	40.5773	47.2906	60.4214	62.0902	61.5485	64.3172	71.2516	72.7215	72.0815	73.4331	72.3807	69.9381	77.3762	71.6563			0	5.45759	16.7593	20.4247	27.138	40.2687	41.9376	41.3959	44.1646	51.099	52.5689	51.9289	53.2805	52.2281	49.7854	57.2236	51.5037
21	8.59648	13.0814	21.2341	44.3914	36.8699	44.476	52.2377	63.5596	60.018	67.6999	67.5752	76.0825	72.8951	68.329	73.704	78.0665	74.2201			0	4.48492	12.6376	35.7949	28.2734	35.8795	43.6412	54.9631	51.4215	59.1034	58.9788	67.486	64.2986	59.7326	65.1075	69.47	65.6236
22	21.024	24.3913	35.6245	56.4862	65.7722	73.0864	77.7544	81.2578	84.0775	84.1008	84.7446	87.2776	87.8477	84.3112	87.1827	88.6861	87.7395			0	3.36737	14.6006	35.4622	44.7483	52.0625	56.7304	60.2338	63.0536	63.0768	63.7207	66.2536	66.8237	63.2872	66.1587	67.6621	66.7155
23	9.63183	8.13544	16.4048	28.446	27.8973	41.9864	46.4906	49.7336	66.588	56.4513	72.5828	71.969	72.1725	74.3506	75.1919	78.1946	77.7069			0	-1.49639	6.77293	18.8142	18.2654	32.3546	36.8588	40.1017	56.9562	46.8194	62.951	62.3371	62.5407	64.7188	65.56	68.5628	68.0751
24	11.055	12.0398	8.62045	17.8264	22.6199	48.29	43.0064	50.8657	49.9856	49.7811	67.4441	58.3592	61.2121	68.329	70.7931	77.3762	73.5298			0	0.98474	-2.43459	6.77133	11.5648	37.235	31.9514	39.8107	38.9306	38.7261	56.3891	47.3042	50.1571	57.274	59.7381	66.3211	62.4747
25	6.5097	8.50748	16.1087	37.5486	47.2906	65.5135	73.2535	74.4885	71.6516	70.6355	69.052	68.9998	72.297	73.63	76.6993	73.0439	75.4389			0	1.99778	9.59896	31.0389	40.7809	59.0038	66.7438	67.9788	65.1419	64.1258	62.5423	62.4901	65.7873	67.1203	70.1896	66.5342	68.9292
26	19.6095	21.4253	19.3107	32.2967	45	44.476	53.6157	65.3936	64.7404	63.8694	68.0228	74.3916	67.4425	75.4926	75.1919	76.1573	76.2347			0	1.81576	-0.29885	12.6871	25.3905	24.8664	34.0061	45.784	45.1308	44.2598	48.4133	54.782	47.8329	55.8831	55.5823	56.5478	56.6251
27	3.8609	5.6271	11.0194	34.0866	43.1524	44.476	64.4419	62.4579	63.5215	59.0889	71.3893	66.4893	72.297	76.3563	77.3394	75.0591	77.5865			0	1.7662	7.15851	30.2257	39.2915	40.6151	60.581	58.597	59.6606	55.228	67.5284	62.6284	68.4361	72.4954	73.4785	71.1982	73.7256
28	16.1149	19.3683	33.3469	44.3914	64.9831	71.041	71.2081	77.0468	68.2851	77.7606	74.3001	74.4965	72.5811	74.3506	82.1031	84.9947	76.7508			0	3.25339	17.232	28.2765	48.8682	54.9261	55.0932	60.9319	52.1702	61.6457	58.1852	58.3816	56.4662	58.2357	65.9882	68.8798	60.6359
29	15.5917	17.4801	19.7921	28.2022	39.0939	57.4706	52.7731	65.0605	65.0697	64.2954	68.7867	71.969	72.1725	71.6436	75.1919	72.1817	75.9794			0	1.88844	4.20048	12.6105	23.5022	41.8789	37.1814	49.4688	49.478	48.7037	53.1951	56.3773	56.5808	56.052	59.6002	56.5901	60.3878
30	20.4926	26.9424	31.2258	35.2291	45	57.4706	65.1991	75.7824	76.9525	86.2081	78.5143	85.2374	77.7279	81.2905	78.7366	82.1042	82.3501			0	6.44978	10.7332	14.7364	24.5074	36.9779	44.7064	55.2898	56.4599	65.7154	58.0217	64.7447	57.2352	60.7978	58.244	61.6115	61.8575
31	9.63183	9.93069	23.9558	27.0374	39.4725	58.5122	67.8416	77.713	65.6426	73.1251	67.6579	73.6807	75.7864	79.7227	81.098	80.1553	80.5025			0	0.29886	14.3239	17.4056	29.8406	48.8804	58.2098	68.0812	56.0108	63.4933	58.0261	64.0489	66.1545	70.0909	71.4662	70.5235	70.8707
32	9.14214	11.574	16.2802	16.4942	40.9144	49.2396	59.3866	63.8218	72.7325	72.143	69.052	81.9706	77.0183	74.2642	77.9182	78.6781	71.0402			0	2.43183	7.13807	7.35201	31.7722	40.0975	50.2444	54.6797	63.5904	63.0008	59.9099	72.8285	67.8762	65.1221	68.776	69.536	61.8981
33	5.8801	8.50748	23.9558	25.9565	34.3803	53.4486	57.8835	67.6523	69.5305	72.8103	73.5641	74.7885	76.3269	73.9537	77.1333	77.3762	62.9101			0	2.62738	18.0757	20.0764	28.5002	47.5685	52.0034	61.7722	63.6504	66.9302	67.684	68.9084	70.4468	68.0736	71.2532	71.4961	57.03
34	10.1775	15.9727	28.2305	34.3834	47.4896	64.0126	65.6805	70.588	74.8314	67.2691	76.8296	79.0181	69.4995	74.8489	78.6084	73.431	73.5298			0	5.79518	18.053	24.2059	37.3121	53.8351	55.503	60.4105	64.6539	57.0916	66.6521	68.8406	59.322	64.6714	68.4309	63.2535	63.3523
35	7.86556	4.75575	12.3251	10.7013	25.0169	40.0773	48.0095	58.9544	62.4406	62.5055	70.1704	77.2282	76.4301	82.7696	83.5175	81.8433	85.3895			0	-3.10981	4.45951	2.83579	17.1513	32.2117	40.1439	51.0888	54.575	54.6399	62.3049	69.3627	68.5645	74.904	75.6519	73.9778	77.524
36	1.53344	-0.95484	5.09483	9.69627	19.44	36.3459	46.2796	48.1086	52.2116	41.2081	51.667	54.9426	75.7864	70.4501	57.6206	58.1069	53.4478			0	-2.48828	3.56139	8.16283	17.9066	34.8124	44.7462	46.5751	50.6781	39.6747	50.1336	53.4092	74.2529	68.9167	56.0872	56.5734	51.9144
37	-2.43305	-5.19123	-4.93675	3.62781	5.71059	4.9163	19.2968	29.6022	31.0503	45.3435	41.4578	43.1538	55.3141	65.2557	48.9917	62.1211	56.8559			0	-2.75818	-2.5037	6.06086	8.14364	7.34935	21.7299	32.0352	33.4834	47.7766	43.8908	45.5869	57.7471	67.6888	51.4248	64.5541	59.289
38	3.98358	9.16983	23.7715	34.0866	39.2894	47.2023	55.953	73.7678	73.8264	74.1391	84.1137	79.8607	78.5127	77.1957	75.1919	70.2512	72.7759			0	5.18625	19.7879	30.103	35.3058	43.2187	51.9694	69.7843	69.8428	70.1555	80.1301	75.8771	74.5291	73.2121	71.2083	66.2676	68.7923
39	12.4343	14.3003	28.1124	34.3834	47.2906	54.484	74.1189	82.1802	84.376	89.0705	83.2423	89.323	86.9602	86.9759	86.0483	83.7164	80.729			0	1.866	15.6781	21.9492	34.8563	42.0497	61.6846	69.7459	71.9417	76.6362	70.808	76.8887	74.5259	74.5417	73.614	71.2821	68.2947
40	7.29453	12.0398	18.9795	23.3539	48.0128	53.4486	61.3423	52.7691	62.328	62.5055	61.927	62.7579	69.5977	82.979	81.098	76.7974	82.0438			0	4.74525	11.685	16.0594	40.7183	46.1541	54.0477	45.4746	55.0335	55.2109	54.6324	55.4634	62.3032	75.6844	73.8035	69.5029	74.7492
41	12.6983	14.9906	16.1087	33.0815	48.8141	60.8655	61.3423	66.1893	74.8314	68.5144	64.4781	70.888	68.9681	79.4228	66.6082	82.3459	79.3505			0	2.29224	3.41034	20.3832	36.1157	48.1672	48.6439	53.491	62.1331	55.8161	51.7797	58.1897	56.2698	66.7245	53.9099	69.6476	66.6522
42	3.8609	3.13078	11.5589	14.6465	28.6105	33.166	38.9324	38.4236	51.4267	60.998	64.9195	68.4685	73.1234	80.3543	75.1919	79.9399	77.3804			0	-0.73012	7.69801	10.7856	24.7496	29.3051	35.0715	34.5627	47.5658	57.1371	61.0586	64.6076	69.2625	76.4934	71.331	76.079	73.5195
tir1afb1345	0	30	60	90	120	150	180	210	240	270	300	330	360	390	420	450	480		tir1afb1345	0	30	60	90	120	150	180	210	240	270	300	330	360	390	420	450	480
mean ∠ from hori	5.86774	6.78153	10.2657	16.3788	25.0455	33.4911	44.7664	50.8912	57.6502	62.4258	64.6867	68.4547	70.754	70.7626	73.2669	72.3383	73.2182		mean ∠ from hori	0	0.913798	4.39801	10.5111	19.1778	27.6233	38.8987	45.0235	51.7825	56.5581	58.819	62.587	64.8862	64.8949	67.3992	66.4706	67.3505
STDEV	9.70652	9.37016	10.5499	10.7	12.8404	14.4682	15.0702	16.3348	15.2837	13.9966	14.7421	13.0034	12.8642	11.8794	11.6676	11.4505	12.2956		STDEV	0	3.23524	5.10072	6.93339	8.87684	10.6364	11.37	13.5555	13.5667	12.6119	13.455	12.7989	12.2353	12.1728	12.2087	12.5221	13.453
n	41	41	41	41	41	41	41	41	41	41	41	41	41	41	41	41	41		n	41	41	41	41	41	41	41	41	41	41	41	41	41	41	41	41	41
SE	1.5159	1.46337	1.64762	1.67106	2.00534	2.25956	2.35357	2.55107	2.38692	2.1859	2.30234	2.0308	2.00906	1.85525	1.82217	1.78827	1.92026		SE	0	0.50526	0.796598	1.08281	1.38633	1.66112	1.77569	2.11702	2.11876	1.96965	2.10132	1.99886	1.91083	1.90107	1.90667	1.95563	2.101
TTEST (t345)	0.707394	0.303365	0.00540424	0.000389773	0.000992878	0.000131957	0.00656955	0.00212432	0.0883563	0.46893	0.806893	0.525326	0.967878	0.243436	0.758702	0.247722	0.823487		TTEST (t345)		0.0683478	5.58675e-05	1.35146e-06	1.01659e-05	3.72378e-07	0.000566975	0.000326997	0.0648593	0.569308	0.986813	0.662939	0.694689	0.351714	0.977201	0.411137	0.923733
1	-2.04541	0	0	-16.6992	-26.565	-45	-48.1798	-60.2551	-61.1892	-62.2415	-66.1941	-65.3764	-68.9625	-66.3706	-63.435	-66.3706	-63.435
2	-3.57633	-4.57392	-11.3099	-19.2901	-30.4655	-39.8056	-54.4623	-62.4472	-67.3801	-64.359	-73.3008	-75.9638	-79.6951	-80.5377	-85.4261	-84.5597	-82.875
3	0	-2.2026	-4.08562	-14.5345	-23.9625	-25.3462	-42.5104	-48.8141	-57.2648	-56.8215	-59.7436	-68.1986	-65.556	-70.9065	-71.565	-66.8014	-66.3706
4	0	-2.60256	-3.81407	-19.6538	-23.9625	-40.6013	-50.1944	-62.4472	-70.71	-75.3791	-79.992	-81.4692	-86.0548	-85.0303	-84.8056	-88.0251	-88.0909
5	0	-6.00901	-7.12502	-16.6992	-26.565	-40.2364	-53.9726	-55.3049	-66.5014	-70.3462	-74.4759	-73.0725	-70.2011	-66.5713	-63.435	-71.565	-67.1663
6	-3.27049	-6.70984	-6.00901	-17.6501	-26.565	-39.8056	-48.8141	-59.9314	-64.9831	-71.565	-71.565	-69.2278	-74.2914	-73.0725	-84.2894	-81.2538	-88.6361
7	0	-8.1301	-10.6197	-18.435	-23.1986	-31.6075	-38.1572	-42.2737	-56.3099	-53.1301	-68.1986	-68.9625	-70.2532	-68.9625	-78.1113	-73.6105	-65.6954
8	-13.707	-14.0362	-16.9275	-24.7751	-32.0054	-42.8789	-54.1624	-63.435	-69.1455	-77.0054	-80.1342	-80.7539	-75.5297	-78.6901	-76.7595	-81.0274	-82.6476
9	-4.89909	-3.81407	-15.9454	-30.4655	-30.2564	-42.2737	-62.354	-62.354	-70.71	-71.565	-75.0686	-76.6755	-76.6075	-85.9144	-84.5597	-87.1376	-87.8789
10	1.08092	0	2.48955	0	0	-10.3049	-19.44	-12.0948	-25.641	-40.1009	-46.9749	-53.427	-49.8991	-64.8852	-62.4472	-66.0375	-60.6422
11	4.08562	1.4321	-2.86241	-14.6209	-16.3895	-15.9454	-21.8014	-36.3843	-39.8056	-42.3974	-46.8476	-53.1301	-59.4208	-62.1027	-68.9625	-72.8973	-66.8014
12	-4.96974	-9.46232	-14.0362	-20.8545	-34.6951	-47.2906	-63.435	-63.435	-72.646	-74.0546	-81.0274	-78.6901	-75.9638	-69.7751	-70.56	-70.3462	-66.0375
13	7.43141	0	-4.08562	-5.44033	-11.3099	-29.7449	-33.6901	-45	-53.1301	-55.4915	-53.6157	-61.1892	-61.6992	-68.4986	-64.6538	-70.56	-70.821
14	-7.76517	-9.78241	-24.7751	-26.565	-39.2894	-49.3987	-53.1301	-78.1113	-78.6901	-80.1342	-82.5686	-81.8699	-82.2348	-79.6951	-84.2894	-78.6901	-75.2564
15	-4.08562	0	-3.57633	-9.46232	-21.0375	-33.6901	-46.8476	-56.3099	-65.2249	-66.5014	-79.1145	-79.1145	-79.1145	-73.7398	-85.0303	-78.1113	-78.2317
16	-40.1009	-39.8056	-42.5104	-42.8789	-50.1944	-69.444	-70.71	-79.1145	-78.1113	-77.7352	-79.3803	-81.2538	-82.875	-85.0303	-82.875	-80.5377	-77.9052
17	-15.2551	-18.435	-21.8014	-26.565	-32.7352	-52.125	-57.9946	-56.9761	-62.1027	-73.4956	-74.4759	-79.2157	-87.6141	-87.2737	-84.4725	-87.8789	-84.5597
18	-6.1155	-3.01279	-4.96974	-7.59464	-12.5288	-15.9454	-21.8014	-24.2278	-24.444	-32.1957	-32.2756	-36.8699	-41.1859	-38.2902	-42.7094	-40.6013	-40.8151
19	5.44033	2.48955	0	-15.9454	-20.2249	-29.7449	-39.2894	-45	-48.5035	-65.556	-55.3049	-63.435	-63.435	-53.1301	-50.5275	-48.0128	-42.5104
20	0	-6.1155	-2.60256	-6.58194	-11.3099	-19.44	-33.6901	-30.4655	-39.8056	-55.008	-49.0856	-55.008	-56.3099	-64.6538	-67.751	-67.6199	-79.2157
21	-23.4287	-18.435	-33.6901	-31.6075	-45	-60.6422	-69.444	-66.2505	-67.0679	-72.3499	-73.3008	-75.9638	-71.565	-71.565	-75.4655	-75.9638	-69.6769
22	-3.69139	-4.08562	0	-14.0362	-28.0725	-36.3843	-48.5763	-55.7131	-62.1027	-65.3764	-66.5014	-71.565	-75.3791	-77.1957	-81.0274	-84.5597	-79.2157
23	-9.46232	-10.3049	-16.2602	-25.2011	-36.8699	-36.8699	-49.3987	-46.3972	-56.3099	-53.9726	-64.7989	-57.7244	-63.435	-66.8014	-71.565	-64.44	-63.435
24	-11.7683	-14.0362	-20.2249	-31.3287	-51.8428	-60.6422	-77.4712	-82.875	-85.4261	-91.8476	-90	-90	-90	-82.875	-83.991	-83.6598	-81.8699
25	8.1301	2.04541	-9.46232	-14.6209	-31.6075	-33.6901	-48.3665	-51.7098	-64.6538	-60.9454	-59.0362	-73.0725	-74.3577	-80.1342	-82.2348	-84.0939	-92.4895
26	4.28915	4.76364	-2.60256	-10.1247	-18.435	-23.4986	-30.9638	-45	-53.6157	-60.2551	-72.1213	-80.2176	-77.4712	-81.8699	-82.2348	-79.3803	-78.3664
27	-8.47114	-14.0362	-16.5044	-19.7989	-32.0054	-33.0239	-37.875	-49.3987	-57.2648	-55.8403	-60.2551	-56.9761	-50.1944	-48.1221	-47.4896	-50.9061	-56.3099
28	-1.27303	-5.44033	-4.96974	-9.78241	-21.0375	-21.2505	-40.6013	-46.7357	-56.9761	-57.7244	-61.3895	-67.3801	-75.9638	-69.2278	-69.444	-69.7751	-67.751
29	-5.19443	-2.86241	-4.57392	-11.8887	-12.0948	-25.3462	-36.8699	-59.7436	-59.3003	-60.9454	-66.8014	-70.9065	-80.9097	-75.0686	-77.4712	-78.2317	-85.6013
30	-13.6713	-10.8855	-18.435	-19.9831	-35.5377	-34.3803	-49.7636	-57.9946	-61.5571	-63.435	-64.9831	-70.3462	-75.9638	-75.9638	-80.5377	-82.2348	-83.991
31	-4.51399	-6.34019	-12.2648	-16.9275	-15.5241	-27.7585	-35.3112	-48.8141	-56.3099	-53.1301	-57.0948	-65.2249	-72.3499	-64.5366	-68.8387	-66.3706	-66.8014
32	-17.1027	-19.6538	-26.565	-31.3287	-45	-47.7263	-72.1811	-73.3008	-77.0054	-87.8789	-94.0856	-92.3859	-92.7263	-86.4237	-87.1376	-85.0303	-90
33	-5.19443	-4.08562	-13.2405	-11.6894	-23.6294	-32.7352	-43.0251	-46.6366	-43.2643	-45	-55.4915	-57.3808	-63.435	-58.6713	-69.6769	-65.7722	-67.751
34	-1.68468	0	-2.60256	-4.39871	-15.5241	-20.556	-41.6335	-31.4296	-34.992	-45	-50.1944	-57.2648	-65.3764	-69.444	-67.1663	-67.3801	-75.9638
35	1.54816	2.29061	-9.46232	-4.76364	-14.9314	-26.565	-30.6507	-47.1211	-51.7098	-61.1892	-62.1027	-72.7585	-68.8387	-70.2011	-66.8014	-71.565	-64.7989
36	4.89909	3.36646	0	1.4688	0	-15.5241	-30.9638	-24.1455	-38.991	-53.1301	-45	-56.9761	-62.7004	-60.5241	-79.3803	-77.4712	-79.0459
37	-18.435	-16.2602	-14.0362	-20.8545	-30.2564	-40.9144	-45	-51.3402	-49.8991	-54.4623	-57.0948	-59.0362	-70.71	-71.565	-79.6951	-76.5043	-78.2317
38	4.39871	8.53077	7.12502	12.5288	3.36646	7.59464	-7.35238	-7.12502	-15.5241	-27.3499	-21.8014	-30.5792	-33.6901	-39.0939	-49.6355	-48.5763	-51.3402
39	-26.565	-30.0686	-32.7352	-34.992	-41.9872	-39.0939	-63.435	-59.5345	-75.4655	-81.8699	-75.9638	-84.8056	-94.3987	-86.8202	-92.4895	-90	-90
40	-10.008	-9.86581	-12.0948	-21.3706	-28.4429	-30.4655	-56.3099	-47.2906	-56.3099	-65.556	-57.5288	-68.5523	-70.3462	-66.8014	-68.1986	-67.751	-67.751
41	-1.68468	-1.90915	-8.53077	-13.4957	-16.2602	-30.9638	-47.2906	-43.6028	-56.8887	-73.6105	-74.0546	-81.8699	-81.573	-82.4054	-82.4054	-80.1342	-75.9638
horizontal	0.34003	0	-0.60491	-0.42378	-0.17284	-0.43736	-1.01698	0	0.26162	0.08552	-0.16559	-0.42067	-0.42378	-0.17495	-0.3807	-1.11157	0
corrected-1	2.38544	0	-0.60491	16.2755	26.3922	44.5626	47.1629	60.2551	61.4508	62.327	66.0285	64.9558	68.5387	66.1957	63.0543	65.2591	63.435			0	-2.38544	-2.99035	13.89	24.0068	42.1772	44.7774	57.8697	59.0654	59.9415	63.643	62.5703	66.1533	63.8102	60.6688	62.8736	61.0495
2	3.91636	4.57392	10.705	18.8663	30.2927	39.3682	53.4453	62.4472	67.6418	64.4445	73.1352	75.5431	79.2714	80.3627	85.0454	83.4481	82.875			0	0.65756	6.78866	14.9499	26.3763	35.4519	49.529	58.5308	63.7254	60.5282	69.2188	71.6267	75.355	76.4464	81.129	79.5317	78.9586
3	0.34003	2.2026	3.48071	14.1107	23.7896	24.9088	41.4935	48.8141	57.5264	56.907	59.578	67.7779	65.1323	70.7316	71.1843	65.6898	66.3706			0	1.86257	3.14068	13.7706	23.4496	24.5688	41.1534	48.474	57.1864	56.567	59.2379	67.4379	64.7922	70.3915	70.8443	65.3498	66.0306
4	0.34003	2.60256	3.20916	19.23	23.7896	40.1639	49.1775	62.4472	70.9716	75.4647	79.8264	81.0486	85.631	84.8553	84.4249	86.9135	88.0909			0	2.26253	2.86913	18.89	23.4496	39.8239	48.8374	62.1072	70.6315	75.1246	79.4864	80.7085	85.291	84.5153	84.0848	86.5735	87.7508
5	0.34003	6.00901	6.52011	16.2755	26.3922	39.799	52.9557	55.3049	66.763	70.4317	74.3103	72.6518	69.7773	66.3964	63.0543	70.4535	67.1663			0	5.66898	6.18008	15.9354	26.0522	39.459	52.6156	54.9648	66.423	70.0917	73.9703	72.3118	69.4373	66.0563	62.7142	70.1135	66.8263
6	3.61052	6.70984	5.4041	17.2263	26.3922	39.3682	47.7971	59.9314	65.2447	71.6506	71.3995	68.8071	73.8676	72.8975	83.9087	80.1423	88.6361			0	3.09932	1.79358	13.6158	22.7817	35.7577	44.1866	56.3209	61.6342	68.0401	67.7889	65.1966	70.2571	69.287	80.2982	76.5318	85.0256
7	0.34003	8.1301	10.0147	18.0112	23.0257	31.1701	37.1403	42.2737	56.5716	53.2156	68.033	68.5418	69.8294	68.7875	77.7306	72.4989	65.6954			0	7.79007	9.67472	17.6711	22.6857	30.8301	36.8002	41.9337	56.2315	52.8756	67.693	68.2018	69.4894	68.4475	77.3906	72.1589	65.3554
8	14.047	14.0362	16.3226	24.3514	31.8325	42.4415	53.1454	63.435	69.4072	77.0909	79.9686	80.3332	75.1059	78.5151	76.3788	79.9158	82.6476			0	-0.01075	2.27561	10.3044	17.7856	28.3946	39.0984	49.388	55.3602	63.0439	65.9216	66.2862	61.0589	64.4681	62.3318	65.8688	68.6006
9	5.23912	3.81407	15.3405	30.0418	30.0836	41.8363	61.337	62.354	70.9716	71.6506	74.903	76.2548	76.1837	85.7394	84.179	86.026	87.8789			0	-1.42505	10.1014	24.8026	24.8445	36.5972	56.0979	57.1149	65.7325	66.4115	69.6639	71.0157	70.9446	80.5003	78.9398	80.7869	82.6398
10	-0.74089	0	-3.09446	-0.42378	-0.17284	9.86749	18.423	12.0948	25.9026	40.1864	46.8093	53.0063	49.4753	64.7102	62.0665	64.9259	60.6422			0	0.74089	-2.35357	0.31711	0.56805	10.6084	19.1639	12.8357	26.6435	40.9273	47.5502	53.7472	50.2162	65.4511	62.8074	65.6668	61.3831
11	-3.74559	-1.4321	2.2575	14.1971	16.2167	15.508	20.7844	36.3843	40.0672	42.483	46.682	52.7094	58.997	61.9278	68.5818	71.7857	66.8014			0	2.31349	6.00309	17.9427	19.9623	19.2536	24.53	40.1299	43.8128	46.2286	50.4276	56.455	62.7426	65.6734	72.3274	75.5313	70.547
12	5.30977	9.46232	13.4313	20.4307	34.5223	46.8533	62.418	63.435	72.9076	74.1401	80.8618	78.2694	75.54	69.6002	70.1793	69.2346	66.0375			0	4.15255	8.12156	15.1209	29.2125	41.5435	57.1082	58.1252	67.5978	68.8303	75.552	72.9596	70.2302	64.2904	64.8695	63.9248	60.7277
13	-7.09138	0	3.48071	5.01655	11.1371	29.3075	32.6731	45	53.3917	55.577	53.4501	60.7685	61.2755	68.3236	64.2731	69.4484	70.821			0	7.09138	10.5721	12.1079	18.2285	36.3989	39.7645	52.0914	60.4831	62.6684	60.5414	67.8599	68.3668	75.415	71.3645	76.5398	77.9124
14	8.1052	9.78241	24.1702	26.1413	39.1166	48.9614	52.1131	78.1113	78.9517	80.2197	82.403	81.4492	81.8111	79.5202	83.9087	77.5785	75.2564			0	1.67721	16.065	18.0361	31.0114	40.8561	44.0079	70.0061	70.8465	72.1145	74.2978	73.344	73.7059	71.415	75.8035	69.4733	67.1512
15	4.42565	0	2.97142	9.03854	20.8647	33.2527	45.8306	56.3099	65.4865	66.587	78.9489	78.6938	78.6907	73.5649	84.6496	76.9998	78.2317			0	-4.42565	-1.45423	4.61289	16.439	28.8271	41.405	51.8843	61.0608	62.1613	74.5232	74.2681	74.265	69.1392	80.2239	72.5741	73.8061
16	40.4409	39.8056	41.9055	42.4551	50.0216	69.0066	69.693	79.1145	78.373	77.8208	79.2148	80.8332	82.4512	84.8553	82.4943	79.4261	77.9052			0	-0.63537	1.4646	2.01418	9.58065	28.5657	29.252	38.6735	37.932	37.3798	38.7738	40.3922	42.0103	44.4144	42.0533	38.9852	37.4643
17	15.5952	18.435	21.1965	26.1413	32.5624	51.6877	56.9776	56.9761	62.3644	73.5812	74.3103	78.795	87.1903	87.0987	84.0918	86.7673	84.5597			0	2.8398	5.60135	10.5461	16.9672	36.0925	41.3825	41.381	46.7692	57.986	58.7152	63.1999	71.5951	71.5036	68.4966	71.1722	68.9645
18	6.45553	3.01279	4.36483	7.17086	12.356	15.508	20.7844	24.2278	24.7056	32.2812	32.1101	36.4492	40.7621	38.1152	42.3287	39.4897	40.8151			0	-3.44274	-2.0907	0.71533	5.90044	9.05251	14.3289	17.7722	18.25	25.8257	25.6545	29.9937	34.3066	31.6597	35.8732	33.0342	34.3595
19	-5.1003	-2.48955	-0.60491	15.5216	20.052	29.3075	38.2724	45	48.7651	65.6416	55.1393	63.0143	63.0112	52.9551	50.1468	46.9012	42.5104			0	2.61075	4.49539	20.6219	25.1523	34.4078	43.3727	50.1003	53.8654	70.7419	60.2396	68.1146	68.1115	58.0554	55.2471	52.0015	47.6107
20	0.34003	6.1155	1.99765	6.15816	11.1371	19.0027	32.6731	30.4655	40.0672	55.0935	48.92	54.5873	55.8862	64.4789	67.3703	66.5083	79.2157			0	5.77547	1.65762	5.81813	10.7971	18.6626	32.3331	30.1255	39.7272	54.7535	48.58	54.2473	55.5461	64.1388	67.0302	66.1683	78.8757
21	23.7687	18.435	33.0852	31.1837	44.8272	60.2049	68.427	66.2505	67.3295	72.4354	73.1352	75.5431	71.1413	71.3901	75.0848	74.8522	69.6769			0	-5.33377	9.31644	7.415	21.0584	36.4362	44.6582	42.4818	43.5608	48.6667	49.3665	51.7744	47.3726	47.6214	51.3161	51.0835	45.9081
22	4.03142	4.08562	-0.60491	13.6125	27.8996	35.947	47.5594	55.7131	62.3644	65.462	66.3358	71.1444	74.9554	77.0208	80.6467	83.4481	79.2157			0	0.0542	-4.63633	9.58104	23.8682	31.9156	43.5279	51.6817	58.3329	61.4305	62.3044	67.113	70.9239	72.9894	76.6153	79.4167	75.1843
23	9.80235	10.3049	15.6553	24.7773	36.6971	36.4325	48.3817	46.3972	56.5716	54.0582	64.6333	57.3037	63.0112	66.6265	71.1843	63.3285	63.435			0	0.5025	5.85294	14.975	26.8947	26.6302	38.5794	36.5948	46.7692	44.2558	54.8309	47.5013	53.2088	56.8241	61.382	53.5261	53.6326
24	12.1083	14.0362	19.6199	30.9049	51.6699	60.2049	76.4542	82.875	85.6877	91.9331	89.8344	89.5793	89.5762	82.7	83.6103	82.5482	81.8699			0	1.92792	7.51163	18.7966	39.5616	48.0966	64.3459	70.7667	73.5794	79.8248	77.7261	77.471	77.4679	70.5917	71.502	70.4399	69.7616
25	-7.79007	-2.04541	8.85741	14.1971	31.4347	33.2527	47.3495	51.7098	64.9154	61.0309	58.8706	72.6518	73.934	79.9592	81.8541	82.9823	92.4895			0	5.74466	16.6475	21.9872	39.2247	41.0428	55.1395	59.4999	72.7055	68.821	66.6607	80.4419	81.724	87.7493	89.6442	90.7724	100.28
26	-3.94912	-4.76364	1.99765	9.70089	18.2621	23.0612	29.9468	45	53.8773	60.3406	71.9557	79.7969	77.0474	81.695	81.8541	78.2688	78.3664			0	-0.81452	5.94677	13.65	22.2112	27.0103	33.8959	48.9491	57.8264	64.2898	75.9048	83.746	80.9965	85.6441	85.8032	82.2179	82.3155
27	8.81117	14.0362	15.8994	19.3751	31.8325	32.5865	36.858	49.3987	57.5264	55.9258	60.0895	56.5555	49.7706	47.9472	47.1089	49.7946	56.3099			0	5.22507	7.08828	10.5639	23.0214	23.7753	28.0468	40.5875	48.7152	47.1147	51.2784	47.7443	40.9595	39.136	38.2977	40.9834	47.4988
28	1.61306	5.44033	4.36483	9.35863	20.8647	20.8131	39.5843	46.7357	57.2377	57.8099	61.2239	66.9595	75.54	69.0528	69.0632	68.6636	67.751			0	3.82727	2.75177	7.74557	19.2516	19.2001	37.9713	45.1226	55.6247	56.1968	59.6109	65.3464	73.9269	67.4397	67.4502	67.0505	66.1379
29	5.53446	2.86241	3.96901	11.4649	11.9219	24.9088	35.8529	59.7436	59.5619	61.0309	66.6358	70.4858	80.4859	74.8936	77.0905	77.1201	85.6013			0	-2.67205	-1.56545	5.93042	6.38746	19.3744	30.3185	54.2091	54.0274	55.4965	61.1014	64.9514	74.9515	69.3592	71.556	71.5857	80.0668
30	14.0113	10.8855	17.83	19.5593	35.3648	33.943	48.7467	57.9946	61.8187	63.5205	64.8175	69.9255	75.54	75.7888	80.157	81.1233	83.991			0	-3.12581	3.8187	5.54799	21.3535	19.9316	34.7353	43.9833	47.8073	49.5091	50.8062	55.9142	61.5286	61.7775	66.1456	67.1119	69.9796
31	4.85402	6.34019	11.6599	16.5037	15.3513	27.3212	34.2942	48.8141	56.5716	53.2156	56.9292	64.8042	71.9261	64.3617	68.458	65.2591	66.8014			0	1.48617	6.80584	11.6497	10.4973	22.4672	29.4402	43.9601	51.7175	48.3616	52.0752	59.9502	67.0721	59.5077	63.604	60.405	61.9474
32	17.4428	19.6538	25.9601	30.9049	44.8272	47.2889	71.1641	73.3008	77.267	87.9644	93.92	91.9653	92.3025	86.2487	86.7569	83.9187	90			0	2.21106	8.51738	13.4622	27.3844	29.8462	53.7214	55.858	59.8242	70.5217	76.4773	74.5225	74.8598	68.806	69.3141	66.4759	72.5572
33	5.53446	4.08562	12.6356	11.2656	23.4565	32.2979	42.0081	46.6366	43.5259	45.0855	55.3259	56.9601	63.0112	58.4964	69.2962	64.6607	67.751			0	-1.44884	7.10115	5.73113	17.9221	26.7634	36.4736	41.1021	37.9915	39.5511	49.7914	51.4256	57.4767	52.9619	63.7617	59.1262	62.2165
34	2.02471	0	1.99765	3.97493	15.3513	20.1187	40.6166	31.4296	35.2536	45.0855	50.0288	56.8441	64.9527	69.269	66.7856	66.2686	75.9638			0	-2.02471	-0.02706	1.95022	13.3266	18.094	38.5919	29.4049	33.2289	43.0608	48.0041	54.8194	62.928	67.2443	64.7609	64.2439	73.939
35	-1.20813	-2.29061	8.85741	4.33986	14.7586	26.1277	29.6337	47.1211	51.9715	61.2747	61.9371	72.3379	68.415	70.0262	66.4207	70.4535	64.7989			0	-1.08248	10.0655	5.54799	15.9667	27.3358	30.8418	48.3292	53.1796	62.4829	63.1453	73.546	69.6231	71.2343	67.6288	71.6616	66.007
36	-4.55906	-3.36646	-0.60491	-1.89258	-0.17284	15.0868	29.9468	24.1455	39.2526	53.2156	44.8344	56.5555	62.2766	60.3492	78.9996	76.3596	79.0459			0	1.1926	3.95415	2.66648	4.38622	19.6458	34.5058	28.7046	43.8117	57.7747	49.3935	61.1145	66.8357	64.9082	83.5587	80.9187	83.605
37	18.775	16.2602	13.4313	20.4307	30.0836	40.477	43.983	51.3402	50.1607	54.5478	56.9292	58.6156	70.2862	71.3901	79.3144	75.3927	78.2317			0	-2.51478	-5.34365	1.6557	11.3086	21.702	25.208	32.5652	31.3857	35.7729	38.1542	39.8406	51.5112	52.6151	60.5395	56.6177	59.4567
38	-4.05868	-8.53077	-7.72993	-12.9526	-3.5393	-8.032	6.3354	7.12502	15.7857	27.4354	21.6358	30.1586	33.2663	38.9189	49.2548	47.4648	51.3402			0	-4.47209	-3.67125	-8.89391	0.51938	-3.97332	10.3941	11.1837	19.8444	31.4941	25.6945	34.2172	37.325	42.9776	53.3134	51.5234	55.3989
39	26.9051	30.0686	32.1303	34.5682	41.8144	38.6565	62.418	59.5345	75.7272	81.9554	75.7982	84.3849	93.9749	86.6452	92.1088	88.8884	90			0	3.1635	5.22524	7.66316	14.9093	11.7514	35.5129	32.6294	48.8221	55.0503	48.8931	57.4798	67.0699	59.7401	65.2038	61.9834	63.0949
40	10.348	9.86581	11.4899	20.9468	28.2701	30.0282	55.293	47.2906	56.5716	65.6416	57.3632	68.1316	69.9224	66.6265	67.8179	66.6394	67.751			0	-0.4822	1.14184	10.5988	17.9221	19.6802	44.9449	36.9426	46.2235	55.2936	47.0152	57.7836	59.5744	56.2785	57.4699	56.2914	57.403
41	2.02471	1.90915	7.92586	13.0719	16.0874	30.5264	46.2736	43.6028	57.1503	73.696	73.889	81.4492	81.1493	82.2304	82.0247	79.0226	75.9638			0	-0.11556	5.90115	11.0472	14.0627	28.5017	44.2489	41.5781	55.1256	71.6713	71.8643	79.4245	79.1245	80.2057	79.9999	76.9979	73.939
AFB1-mCitrine#5	0	30	60	90	120	150	180	210	240	270	300	330	360	390	420	450	480		AFB1-mCitrine#5	0	30	60	90	120	150	180	210	240	270	300	330	360	390	420	450	480
mean ∠ from hori	4.8113	9.4906	18.5226	38.9365	54.4755	61.8649	72.7197	76.733	76.2191	77.6053	76.568	72.9705	70.3527	75.1521	76.2361	79.2463	80.3249		mean ∠ from hori	0	4.6793	13.7113	34.1252	49.6642	57.0536	67.9084	71.9217	71.4078	72.794	71.7567	68.1592	65.5414	70.3408	71.4248	74.435	75.5136
STDEV	4.07014	6.24532	8.82325	7.93872	10.4907	10.7125	7.65361	5.73725	5.76511	5.06529	6.02445	5.66258	7.31683	4.95023	6.10749	6.06497	5.71716		STDEV	0	4.01838	6.50292	6.28842	8.47911	9.12976	7.25795	6.48384	5.15156	4.21908	5.27164	5.90436	6.94574	5.17604	6.8028	6.94253	6.86125
n	39	39	39	39	39	39	39	39	39	39	39	39	39	39	39	39	39		n	39	39	39	39	39	39	39	39	39	39	39	39	39	39	39	39	39
SE	0.651745	1.00005	1.41285	1.27121	1.67986	1.71537	1.22556	0.918695	0.923157	0.811096	0.964685	0.906739	1.17163	0.79267	0.977981	0.971172	0.915478		SE	0	0.643456	1.0413	1.00695	1.35774	1.46193	1.1622	1.03824	0.82491	0.675593	0.844138	0.945454	1.11221	0.82883	1.08932	1.1117	1.09868
TTEST (afb1)	0.841285	0.210811	0.0365853	2.89415e-05	1.18494e-05	0.00278797	0.00341179	0.0133135	0.508959	0.811579	0.207812	0.000355255	8.80627e-07	6.7561e-06	7.93664e-06	0.00025678	0.00303718		TTEST (afb1)		0.0893193	0.00293186	3.8849e-07	2.26766e-07	0.000602425	0.00095972	0.007728	0.543573	0.915296	0.132571	0.000295582	8.97315e-07	9.31094e-05	0.000281653	0.00246626	0.0225265
TTEST (Col)	0.0627554	0.0253401	0.0786039	8.67314e-05	6.14066e-06	0.0124248	0.00116353	0.0108469	0.0767082	0.0619396	0.0952744	0.0156986	0.00037527	0.000558213	0.0158387	0.361559	0.695381		TTEST (Col)		0.248695	0.372061	8.31073e-05	1.21883e-06	0.0374145	0.00726407	0.0786082	0.661791	0.489964	0.751412	1.91034e-05	4.34129e-07	1.27406e-06	0.000590891	0.0296903	0.0665543
1	-2.72631	-3.57633	-7.59464	-40.3645	-58.3925	-51.8428	-67.5206	-69.7751	-77.7352	-80.1342	-82.875	-71.565	-77.9052	-77.9052	-82.875	-81.3843	-80.5377
2	-3.81407	-7.43141	-20.556	-33.0239	-54.4623	-57.7244	-75.0686	-79.3803	-69.444	-75.3791	-75.1735	-64.5366	-68.9625	-75.9638	-78.6901	-81.2538	-84.8056
3	2.72631	0	-15.5241	-31.3287	-38.1572	-50.5275	-70.56	-78.1113	-73.7398	-74.7449	-67.8337	-68.7495	-66.5713	-72.4744	-72.8973	-81.8699	-85.4261
4	-7.69605	-9.46232	-28.6105	-50.1944	-65.2249	-72.646	-83.2902	-83.4181	-82.2348	-83.2902	-83.4802	-73.0725	-66.0375	-78.6901	-77.9052	-79.1145	-84.2894
5	0	-7.12502	-22.8336	-45	-51.3402	-60.6422	-76.6075	-80.1342	-70.9065	-76.6075	-78.1113	-72.1213	-63.435	-77.4712	-84.2894	-87.2737	-84.8056
6	-3.46823	-3.09406	-17.5256	-32.2756	-61.3895	-71.565	-82.2348	-78.6901	-81.4692	-85.0303	-86.1859	-80.5377	-74.3577	-76.7595	-84.2894	-83.2902	-84.2894
7	-1.08092	-2.60256	-14.9314	-35.5377	-49.7636	-68.1986	-73.7398	-78.6901	-70.9744	-74.0546	-79.2157	-74.3577	-75.0686	-77.4712	-77.9052	-82.875	-81.4692
8	-7.35238	-18.435	-34.5085	-53.1301	-68.7495	-74.0546	-79.6951	-76.5043	-80.2176	-79.6951	-83.6598	-69.444	-73.0725	-79.2157	-80.5377	-82.875	-83.6598
9	-13.4957	-22.6199	-33.6901	-52.125	-68.6294	-81.8699	-86.1859	-83.6598	-82.1467	-86.9872	-85.4261	-73.0725	-77.4712	-81.0274	-81.8699	-86.4237	-83.4181
10	-9.46232	-21.8014	-40.6013	-56.9761	-71.565	-84.5597	-81.8699	-84.2894	-81.2538	-88.0909	-87.7974	-81.2538	-81.6341	-83.2902	-86.6335	-87.1376	-83.4181
11	-3.36646	-13.2405	-19.44	-43.0251	-53.6157	-66.0375	-71.565	-74.3577	-73.8108	-75.3791	-73.8108	-64.29	-54.6052	-65.556	-67.751	-70.3462	-81.2538
12	-3.69139	-12.5288	-16.6992	-45	-61.6992	-73.6105	-79.6951	-83.6598	-79.2157	-78.6901	-80.1342	-74.0546	-79.1145	-83.6598	-81.0274	-86.4237	-84.4725
13	-2.04541	-4.76364	-16.6992	-37.5686	-51.8428	-60.9454	-78.2317	-79.992	-70.56	-76.6075	-70.9065	-69.444	-64.2307	-77.4712	-85.9144	-80.5377	-85.2364
14	-7.49586	-10.3049	-27.646	-43.3634	-60.9454	-63.435	-75.9638	-79.1145	-75.2564	-80.1342	-76.5043	-71.565	-66.5014	-75.9638	-74.7449	-82.4054	-86.9872
15	2.04541	-3.17983	-17.5256	-40.9144	-55.6197	-57.9946	-78.6901	-79.2157	-74.3577	-81.2538	-75.9638	-74.0546	-68.1986	-73.3008	-71.565	-78.6901	-77.7352
16	-10.6197	-19.44	-34.5085	-50.5275	-72.8973	-79.2157	-85.2364	-83.4181	-82.875	-87.2737	-83.991	-80.5377	-79.5085	-82.5686	-81.2538	-90	-84.2894
17	-6.1155	-15.9454	-23.6294	-46.9749	-64.6538	-66.8014	-79.6951	-82.5686	-81.0274	-83.991	-79.6951	-76.5043	-65.7722	-80.5377	-82.2348	-82.875	-77.1957
18	-7.69605	-19.44	-27.8973	-40.2364	-67.751	-66.0375	-75.9638	-75.9638	-74.7449	-81.8699	-74.0546	-68.9625	-67.1663	-65.7722	-66.8014	-67.6199	-67.3801
19	-1.97493	-17.6501	-15.5241	-30.4655	-59.7436	-49.3987	-63.435	-78.6901	-76.5043	-80.5377	-75.3791	-73.3008	-68.7495	-72.8973	-74.4759	-82.4054	-83.991
20	-5.44033	-14.0362	-30.5792	-49.3987	-66.3706	-77.4712	-79.992	-85.2364	-83.6598	-83.8845	-77.4712	-75.0686	-56.3099	-69.7751	-71.565	-75.0686	-75.9638
21	-10.8855	-18.435	-30.9638	-42.2737	-68.6294	-72.3499	-80.5377	-85.7636	-83.4181	-82.5686	-82.2348	-74.7449	-83.1572	-82.6476	-80.5377	-82.2348	-81.4692
22	-3.90049	-10.1247	-16.9275	-40.6013	-56.3099	-60.6422	-71.565	-77.1957	-77.4712	-79.6951	-75.1735	-75.9638	-74.0546	-76.866	-77.1957	-77.4712	-80.5377
23	-2.1211	-10.4915	-21.2505	-37.875	-61.3895	-57.9946	-63.435	-75.2564	-66.8014	-71.565	-69.6769	-65.556	-64.9831	-65.556	-70.0169	-70.0169	-68.9625
24	-6.58194	-8.1301	-22.6199	-39.8056	-51.3402	-57.5288	-64.6538	-72.4744	-74.4759	-77.1957	-74.4759	-75.2564	-67.1663	-72.3499	-70.3462	-72.4744	-74.0546
25	-7.85331	-14.0362	-23.1986	-46.9749	-59.7436	-63.435	-68.1986	-74.7449	-71.565	-73.3008	-65.8545	-64.9831	-70.9065	-71.565	-68.1986	-66.8014	-74.0546
26	-8.53077	-8.74616	-14.9314	-39.4725	-52.125	-45	-66.5014	-70.821	-67.6199	-79.2157	-78.6901	-78.0239	-76.5043	-78.6901	-79.0459	-85.2364	-87.9546
27	-4.51399	-9.86581	-16.3895	-41.6335	-55.6197	-63.435	-67.5206	-72.3499	-82.2348	-79.6951	-81.2538	-82.875	-79.992	-78.6901	-83.8845	-81.0274	-83.8845
28	-8.74616	-8.74616	-27.7585	-55.4915	-58.3925	-64.9831	-74.4759	-75.9638	-80.5377	-87.2737	-83.2902	-79.6951	-77.4712	-81.6341	-80.5377	-85.2364	-82.4054
29	-7.76517	-14.0362	-16.5044	-36.8699	-59.7436	-62.1027	-68.1986	-70.71	-76.7595	-76.6075	-78.2317	-75.2564	-76.293	-78.2317	-79.992	-75.9638	-79.1145
30	-9.21103	-14.6209	-23.6294	-40.3645	-57.9946	-58.6713	-69.7751	-68.1986	-70.71	-76.5043	-74.7449	-64.359	-69.6769	-77.4712	-79.8753	-81.8699	-83.2902
31	-5.85601	-9.46232	-22.8336	-39.8056	-48.0128	-61.9275	-64.5366	-68.8387	-78.2317	-73.3008	-80.9097	-75.0686	-72.1811	-75.9638	-79.2157	-70.56	-78.0239
32	-2.60256	-4.89909	-10.3049	-28.0725	-35.5377	-42.5104	-58.5704	-60.9454	-64.9831	-68.1986	-75.9638	-67.9638	-70.56	-68.6294	-69.1455	-74.4759	-71.565
33	0	-10.3049	-7.30576	-33.1113	-41.6335	-49.7636	-64.7989	-69.1455	-67.751	-71.565	-66.5014	-63.435	-61.3895	-72.646	-65.556	-72.2553	-73.3008
34	1.33222	0	2.04541	-22.6199	-30.4655	-36.8699	-70.56	-80.5377	-79.1145	-75.9638	-70.3462	-75.9638	-73.1416	-79.2157	-78.2317	-85.7636	-86.7295
35	-9.86581	-13.2405	-17.7447	-32.0054	-43.2643	-53.1301	-74.0546	-74.0546	-75.9638	-79.992	-69.2278	-67.249	-64.5366	-72.4744	-68.1986	-72.8973	-68.5523
36	-4.39871	-5.44033	-12.3391	-45	-50.1944	-68.6294	-72.8973	-77.7352	-72.646	-72.646	-73.0725	-68.1986	-63.435	-69.444	-71.565	-71.565	-68.1986
37	3.36646	0	-7.76517	-29.7449	-42.8789	-49.0856	-56.3099	-68.7495	-58.6713	-69.444	-61.5571	-58.2405	-55.1755	-69.444	-72.8973	-74.0546	-73.7398
38	0	-2.1211	-10.008	-31.6075	-45	-63.435	-81.2538	-79.6951	-74.7449	-72.8973	-78.0239	-71.0754	-81.6744	-78.6901	-83.6598	-80.5377	-78.2317
39	-3.36646	-5.19443	-17.1027	-43.2643	-37.5686	-63.435	-86.6335	-84.5597	-76.6075	-78.6901	-75.9638	-78.6901	-73.4956	-76.7595	-86.7295	-83.6598	-81.2538
horizontal	0.08642	-0.62665	-1.58138	-1.67949	-0.87468	-0.43014	-0.86282	-0.25693	0.7719	-0.8551	-0.17206	0.68614	-0.17206	-0.61043	-0.94482	-0.08629	0.42885
corrected-1	2.81273	2.94968	6.01326	38.685	57.5178	51.4126	66.6578	69.5182	78.5071	79.2791	82.7029	72.2512	77.7332	77.2948	81.9302	81.2981	80.9665			0	0.13695	3.20053	35.8723	54.7051	48.5999	63.845	66.7055	75.6944	76.4664	79.8902	69.4385	74.9205	74.4821	79.1174	78.4853	78.1538
2	3.90049	6.80476	18.9747	31.3444	53.5876	57.2942	74.2058	79.1234	70.2159	74.524	75.0015	65.2228	68.7904	75.3533	77.7452	81.1675	85.2344			0	2.90427	15.0742	27.4439	49.6872	53.3937	70.3053	75.2229	66.3154	70.6235	71.101	61.3223	64.8899	71.4528	73.8448	77.2671	81.3339
3	-2.63989	-0.62665	13.9427	29.6492	37.2826	50.0974	69.6972	77.8544	74.5117	73.8898	67.6616	69.4356	66.3992	71.864	71.9524	81.7836	85.8549			0	2.01324	16.5826	32.2891	39.9224	52.7373	72.337	80.4943	77.1516	76.5297	70.3015	72.0755	69.0391	74.5039	74.5923	84.4235	88.4948
4	7.78247	8.83567	27.0291	48.5149	64.3502	72.2158	82.4273	83.1611	83.0067	82.4351	83.3081	73.7586	65.8654	78.0796	76.9604	79.0282	84.7183			0	1.0532	19.2466	40.7325	56.5677	64.4334	74.6449	75.3787	75.2243	74.6526	75.5257	65.9762	58.083	70.2972	69.1779	71.2457	76.9358
5	0.08642	6.49837	21.2523	43.3205	50.4655	60.2121	75.7447	79.8773	71.6784	75.7524	77.9393	72.8074	63.2629	76.8608	83.3446	87.1874	85.2344			0	6.41195	21.1658	43.2341	50.3791	60.1257	75.6583	79.7908	71.592	75.666	77.8529	72.721	63.1765	76.7743	83.2582	87.101	85.148
6	3.55465	2.46741	15.9442	30.5962	60.5149	71.1349	81.372	78.4331	82.2411	84.1752	86.0139	81.2238	74.1857	76.1491	83.3446	83.2039	84.7183			0	-1.08724	12.3895	27.0415	56.9602	67.5803	77.8174	74.8785	78.6865	80.6205	82.4592	77.6692	70.631	72.5944	79.7899	79.6492	81.1636
7	1.16734	1.97591	13.35	33.8582	48.889	67.7685	72.877	78.4331	71.7463	73.1995	79.0436	75.0439	74.8965	76.8608	76.9604	82.7887	81.8981			0	0.80857	12.1827	32.6908	47.7216	66.6011	71.7096	77.2658	70.579	72.0322	77.8763	73.8765	73.7292	75.6934	75.7931	81.6213	80.7307
8	7.4388	17.8083	32.9271	51.4506	67.8748	73.6245	78.8323	76.2473	80.9895	78.8401	83.4877	70.1301	72.9004	78.6053	79.5929	82.7887	84.0887			0	10.3695	25.4883	44.0118	60.436	66.1857	71.3935	68.8085	73.5507	71.4013	76.0489	62.6913	65.4616	71.1665	72.1541	75.3499	76.6499
9	13.5822	21.9932	32.1087	50.4455	67.7547	81.4398	85.3231	83.4029	82.9186	86.1321	85.254	73.7586	77.2991	80.4169	80.9251	86.3374	83.8469			0	8.41106	18.5265	36.8634	54.1726	67.8576	71.741	69.8207	69.3364	72.55	71.6719	60.1765	63.717	66.8348	67.3429	72.7552	70.2648
10	9.54874	21.1748	39.0199	55.2966	70.6904	84.1295	81.0071	84.0325	82.0257	87.2358	87.6253	81.94	81.4621	82.6797	85.6887	87.0513	83.8469			0	11.626	29.4712	45.7479	61.1416	74.5808	71.4583	74.4837	72.477	77.687	78.0766	72.3912	71.9133	73.131	76.14	77.5026	74.2982
11	3.45288	12.6139	17.8587	41.3456	52.741	65.6074	70.7022	74.1008	74.5827	74.524	73.6387	64.9762	54.4331	64.9456	66.8062	70.2599	81.6827			0	9.16099	14.4058	37.8927	49.2881	62.1545	67.2494	70.6479	71.1298	71.0712	70.1859	61.5233	50.9803	61.4927	63.3533	66.807	78.2298
12	3.77781	11.9022	15.1179	43.3205	60.8246	73.1803	78.8323	83.4029	79.9876	77.835	79.9621	74.7407	78.9424	83.0494	80.0825	86.3374	84.9013			0	8.12435	11.34	39.5427	57.0468	69.4025	75.0545	79.6251	76.2098	74.0572	76.1843	70.9629	75.1646	79.2716	76.3047	82.5596	81.1235
13	2.13183	4.13699	15.1179	35.8891	50.9681	60.5153	77.3689	79.7351	71.3319	75.7524	70.7344	70.1301	64.0586	76.8608	84.9696	80.4514	85.6652			0	2.00516	12.986	33.7573	48.8363	58.3834	75.2371	77.6033	69.2	73.6206	68.6026	67.9983	61.9268	74.7289	82.8377	78.3196	83.5334
14	7.58228	9.6782	26.0646	41.6839	60.0707	63.0048	75.1009	78.8575	76.0283	79.2791	76.3322	72.2512	66.3294	75.3533	73.8001	82.3191	87.4161			0	2.09592	18.4823	34.1016	52.4884	55.4225	67.5187	71.2753	68.4461	71.6968	68.7499	64.6689	58.7471	67.7711	66.2178	74.7368	79.8338
15	-1.95899	2.55318	15.9442	39.2349	54.745	57.5645	77.8273	78.9588	75.1296	80.3987	75.7917	74.7407	68.0265	72.6903	70.6202	78.6038	78.1641			0	4.51217	17.9032	41.1939	56.704	59.5235	79.7862	80.9178	77.0886	82.3577	77.7507	76.6997	69.9855	74.6493	72.5792	80.5628	80.1231
16	10.7061	18.8134	32.9271	48.8481	72.0226	78.7856	84.3735	83.1611	83.6469	86.4186	83.8189	81.2238	79.3365	81.9582	80.309	89.9137	84.7183			0	8.1073	22.2211	38.142	61.3165	68.0795	73.6675	72.455	72.9408	75.7125	73.1128	70.5177	68.6304	71.2521	69.6029	79.2076	74.0122
17	6.20192	15.3187	22.048	45.2954	63.7791	66.3713	78.8323	82.3117	81.7993	83.1359	79.5231	77.1904	65.6002	79.9273	81.29	82.7887	77.6246			0	9.11683	15.8461	39.0935	57.5772	60.1694	72.6304	76.1097	75.5974	76.934	73.3212	70.9885	59.3983	73.7253	75.0881	76.5868	71.4227
18	7.78247	18.8134	26.3159	38.5569	66.8763	65.6074	75.1009	75.7068	75.5168	81.0148	73.8825	69.6486	66.9943	65.1618	65.8566	67.5336	67.809			0	11.0309	18.5334	30.7744	59.0938	57.8249	67.3185	67.9244	67.7343	73.2323	66.1001	61.8662	59.2118	57.3794	58.0741	59.7511	60.0265
19	2.06135	17.0235	13.9427	28.786	58.8689	48.9686	62.5721	78.4331	77.2762	79.6826	75.2071	73.9869	68.5774	72.2868	73.5311	82.3191	84.4198			0	14.9621	11.8814	26.7247	56.8075	46.9072	60.5108	76.3718	75.2148	77.6212	73.1457	71.9255	66.5161	70.2255	71.4697	80.2577	82.3585
20	5.52675	13.4096	28.9978	47.7192	65.4959	77.0411	79.1292	84.9794	84.4317	83.0294	77.2991	75.7547	56.1379	69.1647	70.6202	74.9823	76.3926			0	7.88284	23.4711	42.1925	59.9692	71.5143	73.6024	79.4527	78.905	77.5027	71.7724	70.228	50.6111	63.638	65.0935	69.4555	70.8659
21	10.9719	17.8083	29.3824	40.5942	67.7547	71.9197	79.6749	85.5067	84.19	81.7135	82.0628	75.431	82.9852	82.0372	79.5929	82.1485	81.8981			0	6.83635	18.4104	29.6223	56.7828	60.9478	68.7029	74.5347	73.218	70.7415	71.0908	64.4591	72.0132	71.0652	68.6209	71.1766	70.9261
22	3.98691	9.49802	15.3461	38.9218	55.4353	60.2121	70.7022	76.9388	78.2431	78.8401	75.0015	76.6499	73.8825	76.2555	76.2509	77.3849	80.9665			0	5.51111	11.3592	34.9349	51.4483	56.2252	66.7153	72.9519	74.2562	74.8531	71.0145	72.663	69.8956	72.2686	72.264	73.398	76.9796
23	2.20752	9.86483	19.6691	36.1955	60.5149	57.5645	62.5721	74.9995	67.5733	70.71	69.5048	66.2422	64.811	64.9456	69.0721	69.9306	69.3913			0	7.65731	17.4616	33.988	58.3073	55.357	60.3646	72.792	65.3658	68.5024	67.2973	64.0347	62.6035	62.7381	66.8645	67.7231	67.1838
24	6.66836	7.50345	21.0385	38.1261	50.4655	57.0987	63.791	72.2175	75.2478	76.3406	74.3038	75.9426	66.9943	71.7395	69.4014	72.3881	74.4834			0	0.83509	14.3701	31.4577	43.7972	50.4303	57.1226	65.5491	68.5794	69.6723	67.6355	69.2742	60.3259	65.0711	62.733	65.7198	67.8151
25	7.93973	13.4096	21.6172	45.2954	58.8689	63.0048	67.3358	74.4879	72.337	72.4457	65.6824	65.6692	70.7344	70.9546	67.2538	66.7151	74.4834			0	5.46986	13.6775	37.3557	50.9292	55.0651	59.396	66.5482	64.3972	64.5059	57.7427	57.7295	62.7947	63.0149	59.314	58.7754	66.5437
26	8.61719	8.11951	13.35	37.793	51.2503	44.5699	65.6386	70.5641	68.3918	78.3606	78.518	78.71	76.3322	78.0796	78.1011	85.1501	88.3834			0	-0.49768	4.73285	29.1758	42.6332	35.9527	57.0214	61.9469	59.7746	69.7434	69.9008	70.0928	67.715	69.4625	69.4839	76.5329	79.7662
27	4.60041	9.23916	14.8082	39.9541	54.745	63.0048	66.6578	72.093	83.0067	78.8401	81.0818	83.5611	79.82	78.0796	82.9397	80.9411	84.3133			0	4.63875	10.2078	35.3536	50.1446	58.4044	62.0573	67.4925	78.4063	74.2396	76.4814	78.9607	75.2195	73.4792	78.3393	76.3407	79.7129
28	8.83258	8.11951	26.1772	53.812	57.5178	64.553	73.6131	75.7068	81.3096	86.4186	83.1181	80.3813	77.2991	81.0237	79.5929	85.1501	82.8342			0	-0.71307	17.3446	44.9794	48.6852	55.7204	64.7805	66.8742	72.477	77.586	74.2855	71.5487	68.4666	72.1911	70.7603	76.3175	74.0016
29	7.85159	13.4096	14.923	35.1904	58.8689	61.6726	67.3358	70.453	77.5314	75.7524	78.0597	75.9426	76.121	77.6213	79.0472	75.8775	79.5433			0	5.558	7.07139	27.3388	51.0173	53.821	59.4842	62.6014	69.6798	67.9008	70.2081	68.091	68.2694	69.7697	71.1956	68.0259	71.6917
30	9.29745	13.9942	22.048	38.685	57.1199	58.2412	68.9123	67.9417	71.4819	75.6492	74.5728	65.0451	69.5048	76.8608	78.9305	81.7836	83.719			0	4.69677	12.7506	29.3876	47.8225	48.9437	59.6149	58.6442	62.1844	66.3517	65.2754	55.7477	60.2074	67.5633	69.6331	72.4862	74.4216
31	5.94243	8.83567	21.2523	38.1261	47.1381	61.4974	63.6738	68.5818	79.0036	72.4457	80.7377	75.7547	72.0091	75.3533	78.2709	70.4737	78.4527			0	2.89324	15.3098	32.1837	41.1957	55.5549	57.7314	62.6394	73.0612	66.5032	74.7952	69.8123	66.0666	69.4109	72.3285	64.5312	72.5103
32	2.68898	4.27244	8.72347	26.393	34.663	42.0803	57.7076	60.6885	65.755	67.3435	75.7917	68.6499	70.3879	68.019	68.2007	74.3896	71.9939			0	1.58346	6.03449	23.704	31.974	39.3913	55.0186	57.9995	63.066	64.6545	73.1027	65.9609	67.6989	65.33	65.5117	71.7006	69.3049
33	0.08642	9.6782	5.72438	31.4318	40.7589	49.3335	63.9361	68.8886	68.5229	70.71	66.3294	64.1211	61.2175	72.0356	64.6112	72.169	73.7296			0	9.59178	5.63796	31.3454	40.6724	49.2471	63.8496	68.8022	68.4365	70.6235	66.2429	64.0347	61.1311	71.9491	64.5248	72.0826	73.6432
34	-1.2458	-0.62665	-3.62679	20.9404	29.5909	36.4398	69.6972	80.2807	79.8864	75.1087	70.1741	76.6499	72.9695	78.6053	77.2869	85.6773	87.1584			0	0.61915	-2.38099	22.1862	30.8367	37.6856	70.943	81.5266	81.1322	76.3545	71.4199	77.8957	74.2153	79.8511	78.5327	86.9231	88.4042
35	9.95223	12.6139	16.1633	30.3259	42.3896	52.7	73.1918	73.7977	76.7357	79.1369	69.0557	67.9352	64.3646	71.864	67.2538	72.811	68.9811			0	2.66164	6.21106	20.3737	32.4374	42.7477	63.2395	63.8454	66.7834	69.1847	59.1035	57.9829	54.4124	61.9118	57.3015	62.8588	59.0289
36	4.48513	4.81368	10.7577	43.3205	49.3197	68.1992	72.0345	77.4783	73.4179	71.7909	72.9004	68.8847	63.2629	68.8335	70.6202	71.4788	68.6274			0	0.32855	6.27258	38.8354	44.8346	63.7141	67.5493	72.9932	68.9327	67.3058	68.4153	64.3996	58.7778	64.3484	66.1351	66.9936	64.1423
37	-3.28004	-0.62665	6.18379	28.0654	42.0042	48.6555	55.4471	68.4926	59.4432	68.5889	61.385	58.9267	55.0035	68.8335	71.9524	73.9683	74.1686			0	2.65339	9.46383	31.3454	45.2843	51.9355	58.7272	71.7726	62.7233	71.8689	64.6651	62.2067	58.2835	72.1136	75.2325	77.2483	77.4487
38	0.08642	1.49445	8.4266	29.928	44.1253	63.0048	80.391	79.4382	75.5168	72.0422	77.8518	71.7615	81.5023	78.0796	82.715	80.4514	78.6606			0	1.40803	8.34018	29.8416	44.0389	62.9184	80.3046	79.3518	75.4304	71.9558	77.7654	71.6751	81.4159	77.9932	82.6286	80.365	78.5741
39	3.45288	4.56778	15.5214	41.5848	36.6939	63.0048	85.7707	84.3027	77.3794	77.835	75.7917	79.3762	73.3236	76.1491	85.7847	83.5735	81.6827			0	1.1149	12.0685	38.1319	33.241	59.5519	82.3178	80.8499	73.9265	74.3821	72.3388	75.9233	69.8707	72.6962	82.3318	80.1206	78.2298
AFB1-mCitrine#7	0	30	60	90	120	150	180	210	240	270	300	330	360	390	420	450	480		AFB1-mCitrine#7	0	30	60	90	120	150	180	210	240	270	300	330	360	390	420	450	480
mean ∠ from hori	5.4533	9.00745	18.9979	33.155	45.618	49.5927	59.092	62.4466	59.444	60.6897	60.8146	62.1227	64.9374	67.1891	69.7919	69.2113	70.0488		mean ∠ from hori	0	3.55415	13.5446	27.7017	40.1647	44.1394	53.6387	56.9933	53.9907	55.2364	55.3613	56.6694	59.4841	61.7358	64.3386	63.758	64.5955
STDEV	8.70108	8.08911	12.0942	11.6709	11.2945	10.7433	11.8545	11.0166	10.1179	11.7536	11.947	10.8634	11.319	11.1139	11.2861	11.4359	11.6445		STDEV	0	3.74757	7.69796	9.1328	8.37489	7.31047	7.14476	7.42432	7.07648	9.95179	9.67598	8.81717	9.66244	9.2833	8.78911	9.35578	9.69459
n	41	41	41	41	41	41	41	41	41	41	41	41	41	41	41	41	41		n	41	41	41	41	41	41	41	41	41	41	41	41	41	41	41	41	41
SE	1.35888	1.26331	1.88879	1.82269	1.76391	1.67781	1.85136	1.7205	1.58016	1.8356	1.8658	1.69657	1.76772	1.7357	1.76259	1.78599	1.81856		SE	0	0.585272	1.20222	1.4263	1.30794	1.1417	1.11582	1.15948	1.10516	1.55421	1.51113	1.37701	1.50902	1.44981	1.37263	1.46113	1.51404
TTEST (afb1)	0.634697	0.34737	0.0402669	0.0102448	0.0189187	0.965656	0.613104	0.154914	1.44774e-05	3.87465e-07	2.38683e-09	2.45512e-10	2.38725e-09	5.5304e-10	7.84648e-09	2.97079e-10	3.68963e-09		TTEST (afb1)		0.407209	0.00627733	0.00295414	0.00782915	0.705902	0.342339	0.0471141	4.15848e-07	4.10838e-09	2.72138e-11	1.80718e-11	2.20434e-10	5.42342e-10	1.32059e-08	2.04836e-10	1.87854e-08
TTEST (Col)	0.0771558	0.0740049	0.0843301	0.11774	0.0932962	0.114382	0.0362795	0.00343425	4.82175e-08	2.12516e-06	1.55392e-06	2.12452e-09	7.05205e-07	3.46749e-08	7.54601e-06	5.02123e-07	2.69391e-06		TTEST (Col)		0.9625	0.457263	0.614467	0.456559	0.000489297	9.40597e-06	2.79404e-07	5.92414e-16	4.24246e-11	3.02807e-12	9.4807e-16	2.71424e-11	6.37949e-13	1.059e-09	2.11104e-10	8.54857e-10
1	-8.1301	-15.2551	-29.3577	-48.0128	-56.3099	-59.9314	-72.1811	-77.9052	-70.0169	-78.6901	-74.3577	-82.1467	-81.8699	-80.9097	-83.6598	-82.4054	-84.8056
2	-11.6894	-19.44	-29.0546	-55.4915	-61.6992	-66.0375	-72.1811	-72.8973	-73.7398	-70.0169	-70.9744	-66.2505	-72.4744	-71.565	-75.3791	-73.8108	-73.6105
3	-1.97493	-6.00901	-18.435	-36.8699	-47.2906	-50.1944	-57.0948	-66.3706	-60.6422	-64.7989	-60.9454	-60.5241	-63.435	-64.9831	-66.3706	-63.435	-69.6769
4	6.34019	-3.36646	-8.74616	-25.3462	-24.7751	-39.2894	-48.8141	-57.2648	-54.7824	-57.9946	-59.5345	-59.9314	-62.5256	-63.435	-64.9831	-62.1027	-60.0184
5	4.57392	0	-9.46232	-21.8014	-37.875	-29.7449	-49.0856	-50.7106	-46.7357	-51.3402	-50.9061	-54.4623	-58.5704	-56.3099	-66.0375	-66.3706	-63.435
6	-3.57633	-8.53077	-12.9946	-26.565	-42.5104	-53.1301	-57.3808	-63.435	-53.1301	-62.2415	-57.0948	-59.9314	-59.6209	-58.5704	-69.7751	-67.751	-73.3008
7	-18.435	-17.5256	-23.9625	-34.3803	-47.1211	-52.4314	-61.1892	-72.3499	-59.5345	-57.5288	-67.6199	-66.0375	-62.2415	-73.0725	-79.2157	-84.8056	-80.9097
8	-7.76517	-11.8887	-19.9831	-34.992	-50.1944	-57.0948	-61.3895	-64.6538	-61.607	-61.3895	-66.8014	-65.2249	-72.8973	-77.4712	-81.0274	-76.7595	-77.9052
9	-1.90915	-8.1301	-10.3049	-36.8699	-50.1944	-53.9726	-62.5256	-65.7722	-66.8014	-65.2249	-66.2505	-70.0169	-70.71	-75.9638	-80.1342	-81.2538	-82.5686
10	-5.71059	-8.1301	-10.3049	-39.2894	-42.2737	-51.8428	-67.8337	-73.4956	-65.2249	-73.7398	-78.2317	-77.7352	-80.1342	-79.3803	-77.9052	-84.0939	-83.1572
11	-19.44	-22.8336	-32.0054	-45	-62.354	-62.2415	-71.565	-73.3008	-64.1336	-67.5206	-71.565	-72.3499	-75.4655	-73.7398	-79.6951	-74.9315	-77.7352
12	-4.96974	-4.76364	-29.3577	-45	-56.3099	-55.4915	-63.435	-68.1986	-63.435	-63.435	-70.9065	-62.5924	-64.9831	-66.3706	-63.435	-62.2415	-68.7495
13	-9.46232	-11.8887	-29.7449	-39.8056	-54.4623	-53.1301	-72.5528	-70.71	-69.7751	-73.7398	-72.1811	-74.7449	-81.0274	-75.9638	-80.5377	-78.6901	-79.2157
14	-17.1027	-27.7585	-52.4314	-63.435	-74.0546	-66.8014	-79.8753	-85.2364	-78.6901	-80.9097	-81.8699	-82.875	-83.991	-85.9144	-90	-87.8789	-87.3974
15	4.08562	-2.48955	-5.71059	-39.0939	-46.8476	-42.8789	-48.5763	-45	-48.5035	-37.6942	-45	-41.1859	-45	-42.5104	-47.4896	-51.3402	-49.1849
16	-1.50744	-11.8887	-19.179	-41.1859	-42.7094	-43.3634	-53.7462	-60.4612	-57.9946	-54.4623	-55.4915	-59.7436	-57.7244	-64.7989	-68.1986	-70.2011	-66.8014
17	-2.2026	-15.9454	-20.556	-41.1859	-53.7462	-52.4314	-59.6209	-70.821	-54.7824	-50.7106	-49.6355	-51.953	-50.4403	-58.5704	-60.2551	-60.9454	-52.3058
18	-4.39871	-11.3099	-31.4296	-46.9749	-54.7824	-58.2405	-67.3801	-69.444	-62.4472	-59.0362	-58.3925	-62.4472	-62.1027	-73.7398	-72.2553	-72.3499	-73.3008
19	-21.3706	-19.44	-36.0274	-51.3402	-63.435	-63.435	-71.565	-69.1455	-63.435	-63.435	-56.3099	-56.8887	-57.7244	-55.008	-67.3801	-54.1624	-62.2415
20	-14.7436	-20.556	-40.8151	-54.7824	-64.6538	-64.359	-78.0239	-74.7449	-70.821	-72.8973	-68.6294	-69.2278	-72.1811	-72.3499	-77.1957	-80.1342	-76.4296
21	-16.6992	-20.2249	-33.0239	-53.1301	-58.6713	-68.6294	-73.0725	-70.9065	-68.1986	-42.2737	-43.1524	-55.008	-67.6199	-68.5523	-80.5377	-81.8699	-79.5085
22	-7.12502	-9.86581	-16.8584	-39.8056	-42.7094	-53.1301	-51.8428	-57.0948	-51.3402	-51.8428	-45	-58.5704	-57.0948	-66.2505	-62.2415	-52.4314	-64.6538
23	-3.57633	-6.70984	-5.71059	-27.5528	-45	-38.6598	-51.8428	-49.0856	-46.6366	-45	-39.0939	-51.8428	-48.3665	-58.3925	-56.3099	-60.2551	-60.6422
24	0	-6.34019	-8.1301	-26.565	-40.6013	-45	-54.4623	-57.7244	-49.7636	-52.4314	-50.5275	-54.7824	-57.7244	-55.3049	-61.6992	-59.5345	-57.9946
25	17.1027	7.76517	-1.90915	-19.0935	-31.4296	-39.8056	-45	-50.1944	-46.3322	-49.3987	-42.5104	-49.0856	-55.008	-57.0948	-63.435	-53.9726	-64.2307
26	-8.97263	-9.46232	-11.6336	-24.6236	-33.6901	-42.5104	-63.435	-52.696	-56.3099	-62.1027	-60.7512	-63.435	-67.751	-66.5014	-76.6075	-67.751	-71.565
27	-4.76364	-9.46232	-7.76517	-28.3008	-45	-50.1944	-69.444	-66.0375	-59.0362	-63.435	-63.435	-67.1663	-66.2505	-74.0546	-79.2157	-75.9638	-79.1145
28	-13.3925	-14.0362	-25.3462	-39.0939	-51.3402	-68.1986	-75.9638	-73.7398	-73.0725	-69.7751	-70.3462	-75.9638	-78.6901	-77.0054	-83.2902	-77.0054	-79.2157
29	5.19443	8.74616	-3.57633	-17.354	-26.565	-26.565	-33.6901	-42.1376	-52.4314	-56.3099	-51.3402	-63.435	-69.444	-70.71	-66.8014	-70.0169	-77.9052
30	-9.86581	-12.5288	-13.2405	-26.565	-33.6901	-47.7263	-66.0375	-69.1455	-70.821	-73.0725	-73.0725	-69.6769	-76.6075	-75.9638	-83.991	-79.6951	-81.1193
31	-4.76364	-4.23639	-6.34019	-18.435	-35.5377	-45	-50.9061	-50.7106	-53.5308	-59.5345	-53.6157	-61.3895	-58.2405	-67.3801	-70.56	-63.435	-71.565
32	-3.46823	-10.7843	-19.2901	-35.3112	-45	-49.8991	-64.9831	-61.1892	-62.1027	-60.2551	-56.3099	-54.0903	-63.435	-63.435	-65.7722	-63.435	-57.7244
33	6.00901	0	-2.72631	-12.8043	-33.6901	-30.9638	-34.2157	-40.1009	-26.565	-30.5792	-32.9052	-28.3008	-32.6192	-30.9638	-36.8699	-39.8056	-39.0939
34	0	-6.34019	-9.86581	-19.2901	-30.2564	-45	-41.4237	-58.3925	-56.3099	-60.4612	-57.3808	-63.435	-66.0375	-63.435	-66.8014	-68.1986	-62.4472
35	-15.9454	-21.2505	-39.2894	-46.5482	-57.0948	-68.1986	-77.4712	-79.1145	-67.3801	-75.9638	-68.1986	-78.6901	-82.4054	-79.3803	-90	-80.5377	-86.9872
36	-4.96974	-10.7843	-20.556	-35.2176	-50.1944	-56.3099	-60.2551	-64.7989	-63.435	-65.556	-68.7495	-61.6992	-71.0296	-66.8014	-75.9638	-69.7751	-67.751
37	4.96974	0	-7.12502	-26.565	-41.6335	-38.047	-50.7106	-46.8476	-50.1944	-49.0856	-52.125	-48.8141	-51.953	-51.8428	-50.9061	-46.5482	-46.273
38	-12.2648	-18.435	-32.4712	-43.3634	-63.435	-57.5288	-74.5778	-78.6901	-66.3706	-77.4712	-70.9744	-66.5713	-69.8637	-71.565	-70.71	-66.8014	-60.2551
39	-4.96974	-12.9946	-20.2249	-40.6013	-56.3099	-42.5104	-58.3925	-73.6105	-58.3925	-75.2564	-57.2648	-62.5256	-70.3462	-74.0546	-82.5686	-77.4712	-76.6075
40	9.46232	-2.38594	-9.46232	-36.8699	-42.7094	-45	-57.5288	-55.008	-52.696	-60.9454	-54.6888	-55.008	-67.5206	-64.6538	-69.1455	-65.0952	-64.9831
41	-19.6538	-21.8014	-21.8014	-32.7352	-45	-45	-77.1957	-68.6294	-77.2756	-82.2348	-85.2364	-75.6186	-84.4725	-87.7974	-82.1467	-85.9144	-86.8202
horizontal	-0.08526	-1.43844	-0.17794	-2.87545	-1.77604	-1.13702	-2.09016	-1.40145	-0.42005	-1.01249	0.34206	-0.34989	-0.85766	-0.17103	-1.58625	-0.08564	-0.17575
corrected-1	8.04484	13.8167	29.1798	45.1373	54.5339	58.7944	70.091	76.5038	69.5968	77.6776	74.6998	81.7968	81.0122	80.7387	82.0736	82.3197	84.6298			0	5.77184	21.135	37.0925	46.489	50.7496	62.0461	68.459	61.552	69.6327	66.655	73.752	72.9674	72.6938	74.0287	74.2749	76.585
2	11.6041	18.0016	28.8767	52.616	59.9232	64.9005	70.091	71.4958	73.3197	69.0044	71.3165	65.9006	71.6168	71.394	73.7929	73.7251	73.4347			0	6.39748	17.2726	41.0119	48.3191	53.2964	58.4868	59.8917	61.7156	57.4003	59.7123	54.2965	60.0127	59.7899	62.1888	62.121	61.8306
3	1.88967	4.57057	18.257	33.9945	45.5146	49.0574	55.0046	64.9692	60.2222	63.7864	61.2875	60.1742	62.5773	64.8121	64.7844	63.3493	69.5011			0	2.6809	16.3673	32.1048	43.6249	47.1677	53.1149	63.0795	58.3325	61.8967	59.3978	58.2845	60.6876	62.9224	62.8947	61.4596	67.6114
4	-6.42545	1.92802	8.56822	22.4707	22.9991	38.1524	46.7239	55.8633	54.3624	56.9821	59.8765	59.5815	61.6679	63.2639	63.3969	62.0171	59.8426			0	8.35347	14.9937	28.8962	29.4245	44.5778	53.1494	62.2888	60.7878	63.4076	66.302	66.007	68.0934	69.6894	69.8223	68.4425	66.2681
5	-4.65918	-1.43844	9.28438	18.926	36.0989	28.6079	46.9955	49.3091	46.3156	50.3277	51.2482	54.1124	57.7128	56.1389	64.4513	66.285	63.2592			0	3.22074	13.9436	23.5851	40.7581	33.267	51.6546	53.9683	50.9748	54.9869	55.9074	58.7716	62.3719	60.7981	69.1104	70.9442	67.9184
6	3.49107	7.09233	12.8167	23.6896	40.7344	51.9931	55.2906	62.0335	52.71	61.229	57.4368	59.5815	58.7632	58.3994	68.1889	67.6653	73.125			0	3.60126	9.32561	20.1985	37.2433	48.502	51.7995	58.5424	49.219	57.7379	53.9457	56.0905	55.2721	54.9083	64.6978	64.1743	69.6339
7	18.3497	16.0871	23.7845	31.5049	45.3451	51.2944	59.0991	70.9484	59.1144	56.5163	67.9619	65.6876	61.3838	72.9015	77.6294	84.7199	80.734			0	-2.26256	5.43486	13.1552	26.9954	32.9447	40.7494	52.5987	40.7647	38.1666	49.6122	47.3379	43.0341	54.5518	59.2798	66.3702	62.3843
8	7.67991	10.4502	19.8052	32.1166	48.4184	55.9577	59.2994	63.2524	61.1869	60.377	67.1435	64.875	72.0396	77.3002	79.4411	76.6738	77.7295			0	2.77031	12.1253	24.4367	40.7385	48.2778	51.6195	55.5725	53.507	52.6971	59.4636	57.1951	64.3597	69.6202	71.7612	68.9939	70.0496
9	1.82389	6.69166	10.1269	33.9945	48.4184	52.8356	60.4354	64.3708	66.3814	64.2124	66.5926	69.667	69.8523	75.7927	78.5479	81.1682	82.3928			0	4.86777	8.30302	32.1706	46.5945	51.0117	58.6115	62.5469	64.5575	62.3885	64.7687	67.8431	68.0284	73.9688	76.724	79.3443	80.569
10	5.62533	6.69166	10.1269	36.414	40.4977	50.7058	65.7435	72.0942	64.8048	72.7273	78.5738	77.3853	79.2765	79.2093	76.319	84.0082	82.9815			0	1.06633	4.50158	30.7886	34.8723	45.0804	60.1182	66.4689	59.1795	67.102	72.9484	71.76	73.6512	73.584	70.6937	78.3829	77.3561
11	19.3548	21.3952	31.8274	42.1245	60.578	61.1044	69.4749	71.8993	63.7136	66.5081	71.9071	72	74.6079	73.5688	78.1089	74.8459	77.5595			0	2.04044	12.4727	22.7698	41.2232	41.7497	50.1201	52.5445	44.3588	47.1533	52.5523	52.6452	55.2531	54.214	58.7541	55.4911	58.2047
12	4.88448	3.3252	29.1798	42.1245	54.5339	54.3545	61.3448	66.7971	63.0149	62.4225	71.2486	62.2425	64.1255	66.1996	61.8487	62.1558	68.5737			0	-1.55928	24.2953	37.2401	49.6494	49.47	56.4603	61.9127	58.1304	57.538	66.3641	57.358	59.241	61.3151	56.9642	57.2713	63.6893
13	9.37706	10.4502	29.5669	36.9301	52.6863	51.9931	70.4626	69.3085	69.3551	72.7273	72.5232	74.395	80.1697	75.7927	78.9514	78.6044	79.04			0	1.07316	20.1899	27.5531	43.3092	42.616	61.0856	59.9314	59.978	63.3503	63.1461	65.0179	70.7927	66.4157	69.5744	69.2274	69.6629
14	17.0175	26.3201	52.2535	60.5595	72.2786	65.6644	77.7852	83.8349	78.27	79.8972	82.212	82.5251	83.1333	85.7433	88.4137	87.7933	87.2217			0	9.30263	35.236	43.542	55.2611	48.6469	60.7677	66.8174	61.2525	62.8798	65.1945	65.5076	66.1159	68.7259	71.3963	70.7758	70.2042
15	-4.17088	1.05111	5.53265	36.2184	45.0716	41.7419	46.4862	43.5986	48.0835	36.6818	45.3421	40.836	44.1423	42.3394	45.9033	51.2546	49.0092			0	5.22199	9.70353	40.3893	49.2424	45.9128	50.657	47.7694	52.2544	40.8526	49.5129	45.0069	48.3132	46.5103	50.0742	55.4254	53.18
16	1.42218	10.4502	19.0011	38.3105	40.9333	42.2264	51.656	59.0598	57.5746	53.4498	55.8335	59.3937	56.8667	64.6278	66.6123	70.1155	66.6257			0	9.02804	17.5789	36.8883	39.5112	40.8042	50.2338	57.6376	56.1524	52.0277	54.4114	57.9715	55.4445	63.2057	65.1902	68.6933	65.2035
17	2.11734	14.507	20.3781	38.3105	51.9701	51.2944	57.5307	69.4195	54.3624	49.6981	49.9775	51.6031	49.5827	58.3994	58.6689	60.8598	52.13			0	12.3896	18.2608	36.1931	49.8528	49.1771	55.4134	67.3022	52.245	47.5808	47.8602	49.4857	47.4653	56.2821	56.5515	58.7424	50.0127
18	4.31345	9.87149	31.2516	44.0995	53.0064	57.1035	65.29	68.0425	62.0271	58.0237	58.7346	62.0973	61.2451	73.5688	70.6691	72.2642	73.125			0	5.55804	26.9382	39.786	48.6929	52.79	60.9765	63.7291	57.7137	53.7103	54.4211	57.7838	56.9316	69.2553	66.3556	67.9508	68.8116
19	21.2854	18.0016	35.8494	48.4647	61.6589	62.2979	69.4749	67.7441	63.0149	62.4225	56.652	56.5388	56.8667	54.837	65.7939	54.0767	62.0657			0	-3.28377	14.5641	27.1794	40.3736	41.0126	48.1895	46.4587	41.7295	41.1371	35.3666	35.2534	35.5813	33.5516	44.5085	32.7914	40.7803
20	14.6583	19.1176	40.6371	51.907	62.8778	63.222	75.9337	73.3434	70.4009	71.8848	68.9714	68.8779	71.3235	72.1788	75.6095	80.0486	76.2538			0	4.45931	25.9788	37.2487	48.2195	48.5637	61.2754	58.6851	55.7426	57.2265	54.3131	54.2196	56.6652	57.5206	60.9512	65.3903	61.5955
21	16.614	18.7864	32.8459	50.2546	56.8953	67.4924	70.9823	69.5051	67.7785	41.2612	43.4944	54.6581	66.7622	68.3812	78.9514	81.7843	79.3328			0	2.17244	16.232	33.6407	40.2813	50.8784	54.3684	52.8911	51.1646	24.6472	26.8805	38.0441	50.1482	51.7673	62.3374	65.1703	62.7188
22	7.03976	8.42737	16.6805	36.9301	40.9333	51.9931	49.7526	55.6933	50.9201	50.8303	45.3421	58.2205	56.2371	66.0795	60.6552	52.3458	64.4781			0	1.38761	9.6407	29.8904	33.8936	44.9533	42.7129	48.6536	43.8804	43.7905	38.3023	51.1808	49.1973	59.0397	53.6154	45.306	57.4383
23	3.49107	5.2714	5.53265	24.6774	43.224	37.5228	49.7526	47.6842	46.2165	43.9875	39.4359	51.4929	47.5088	58.2215	54.7237	60.1695	60.4665			0	1.78033	2.04158	21.1863	39.7329	34.0317	46.2615	44.1931	42.7255	40.4964	35.9448	48.0018	44.0177	54.7304	51.2326	56.6784	56.9754
24	-0.08526	4.90175	7.95216	23.6896	38.8252	43.863	52.3722	56.3229	49.3436	51.4189	50.8696	54.4325	56.8667	55.1338	60.113	59.4488	57.8189			0	4.98701	8.03742	23.7749	38.9105	43.9482	52.4574	56.4082	49.4288	51.5042	50.9549	54.5178	56.952	55.2191	60.1983	59.5341	57.9041
25	-17.188	-9.20361	1.73121	16.218	29.6535	38.6686	42.9098	48.793	45.9122	48.3862	42.8525	48.7357	54.1503	56.9237	61.8487	53.887	64.0549			0	7.98438	18.9192	33.406	46.8415	55.8565	60.0978	65.981	63.1002	65.5742	60.0405	65.9237	71.3383	74.1117	79.0367	71.075	81.2429
26	8.88737	8.02388	11.4557	21.7481	31.914	41.3734	61.3448	51.2946	55.8899	61.0902	61.0932	63.0851	66.8933	66.3304	75.0212	67.6653	71.3893			0	-0.86349	2.56832	12.8607	23.0267	32.4861	52.4574	42.4072	47.0025	52.2029	52.2059	54.1977	58.0059	57.443	66.1339	58.778	62.5019
27	4.67838	8.02388	7.58723	25.4253	43.224	49.0574	67.3538	64.6361	58.6162	62.4225	63.777	66.8165	65.3929	73.8836	77.6294	75.8781	78.9387			0	3.3455	2.90885	20.7469	38.5456	44.379	62.6754	59.9577	53.9378	57.7441	59.0986	62.1381	60.7145	69.2052	72.9511	71.1997	74.2603
28	13.3072	12.5978	25.1682	36.2184	49.5641	67.0616	73.8736	72.3384	72.6524	68.7626	70.6882	75.6139	77.8324	76.8344	81.7039	76.9197	79.04			0	-0.70944	11.861	22.9112	36.2569	53.7543	60.5664	59.0311	59.3452	55.4554	57.381	62.3066	64.5252	63.5271	68.3967	63.6125	65.7327
29	-5.27969	-10.1846	3.39839	14.4786	24.789	25.428	31.5999	40.7361	52.0114	55.2974	51.6822	63.0851	68.5863	70.5389	65.2152	69.9313	77.7295			0	-4.90491	8.67808	19.7583	30.0687	30.7077	36.8796	46.0158	57.291	60.5771	56.9619	68.3648	73.866	75.8186	70.4948	75.2109	83.0092
30	9.78055	11.0904	13.0626	23.6896	31.914	46.5893	63.9474	67.7441	70.4009	72.06	73.4146	69.327	75.7498	75.7927	82.4047	79.6095	80.9436			0	1.30982	3.28203	13.909	22.1335	36.8087	54.1668	57.9635	60.6204	62.2795	63.634	59.5464	65.9693	66.0122	72.6242	69.829	71.163
31	4.67838	2.79795	6.16225	15.5595	33.7616	43.863	48.816	49.3091	53.1107	58.522	53.9577	61.0396	57.3829	67.2091	68.9737	63.3493	71.3893			0	-1.88043	1.48387	10.8811	29.0833	39.1846	44.1376	44.6308	48.4323	53.8436	49.2793	56.3613	52.7045	62.5307	64.2953	58.6709	66.7109
32	3.38297	9.34586	19.1121	32.4358	43.224	48.7621	62.8929	59.7878	61.6827	59.2426	56.652	53.7404	62.5773	63.2639	64.186	63.3493	57.5486			0	5.96289	15.7291	29.0528	39.841	45.3791	59.51	56.4048	58.2997	55.8597	53.269	50.3574	59.1943	59.8809	60.803	59.9663	54.1656
33	-6.09427	-1.43844	2.54837	9.92882	31.914	29.8267	32.1255	38.6995	26.145	29.5667	33.2473	27.9509	31.7616	30.7927	35.2837	39.7199	38.9181			0	4.65583	8.64264	16.0231	38.0083	35.921	38.2198	44.7937	32.2393	35.661	39.3416	34.0451	37.8558	36.887	41.3779	45.8142	45.0124
34	-0.08526	4.90175	9.68787	16.4146	28.4804	43.863	39.3335	56.9911	55.8899	59.4487	57.7228	63.0851	65.1799	63.2639	65.2152	68.1129	62.2714			0	4.98701	9.77313	16.4999	28.5657	43.9482	39.4188	57.0763	55.9751	59.534	57.8081	63.1703	65.2651	63.3492	65.3004	68.1982	62.3567
35	15.8601	19.8121	39.1115	43.6727	55.3187	67.0616	75.381	77.713	66.9601	74.9513	68.5406	78.3402	81.5477	79.2093	88.4137	80.452	86.8115			0	3.95193	23.2513	27.8126	39.4586	51.2014	59.5209	61.8529	51.0999	59.0911	52.6805	62.48	65.6876	63.3492	72.5536	64.5919	70.9513
36	4.88448	9.34586	20.3781	32.3421	48.4184	55.1729	58.165	63.3974	63.0149	64.5436	69.0915	61.3494	70.1719	66.6304	74.3775	69.6895	67.5752			0	4.46138	15.4936	27.4577	43.5339	50.2884	53.2805	58.513	58.1304	59.6591	64.2071	56.4649	65.2875	61.7459	69.493	64.805	62.6908
37	-5.055	-1.43844	6.94708	23.6896	39.8575	36.91	48.6204	45.4462	49.7744	48.0731	52.4671	48.4642	51.0953	51.6717	49.3199	46.4625	46.0973			0	3.61656	12.0021	28.7446	44.9125	41.965	53.6754	50.5012	54.8294	53.1281	57.5221	53.5192	56.1503	56.7267	54.3749	51.5175	51.1523
38	12.1795	16.9965	32.2933	40.488	61.6589	56.3918	72.4877	77.2886	65.9506	76.4587	71.3165	66.2214	69.006	71.394	69.1237	66.7158	60.0794			0	4.817	20.1137	28.3085	49.4794	44.2123	60.3082	65.1091	53.7711	64.2792	59.1369	54.0419	56.8265	59.2145	56.9442	54.5363	47.8999
39	4.88448	11.5562	20.0469	37.7258	54.5339	41.3734	56.3023	72.209	57.9724	74.2439	57.6068	62.1757	69.4885	73.8836	80.9823	77.3856	76.4318			0	6.6717	15.1624	32.8414	49.6494	36.489	51.4179	67.3245	53.088	69.3595	52.7223	57.2912	64.604	68.9991	76.0979	72.5011	71.5473
40	-9.54758	0.9475	9.28438	33.9945	40.9333	43.863	55.4387	53.6065	52.276	59.9329	55.0308	54.6581	66.6629	64.4828	67.5593	65.0096	64.8074			0	10.4951	18.832	43.542	50.4809	53.4106	64.9862	63.1541	61.8236	69.4805	64.5784	64.2057	76.2105	74.0304	77.1069	74.5572	74.3549
41	19.5686	20.363	21.6235	29.8598	43.224	43.863	75.1056	67.2279	76.8556	81.2223	85.5784	75.2687	83.6148	87.6264	80.5604	85.8287	86.6444			0	0.79441	2.05491	10.2912	23.6554	24.2944	55.537	47.6594	57.287	61.6538	66.0099	55.7002	64.0462	68.0578	60.9919	66.2602	67.0759
[truncated: 6 more columns]
