# Supplementary material for: Genetic analysis of the Arabidopsis TIR1/AFB auxin receptors reveals both overlapping and specialized functions
Source: eLife. 2020 Feb 18;9:e54740. doi: 10.7554/eLife.54740 (PMC7048394; doi:10.7554/eLife.54740)
Supplement: Figure 7—source data 1. [file elife-54740-fig7-data1.xlsx]

## Sheet: Figure 7
	0	30	60	90	120	150	180	210	240	270	300	330	360	390	420	450	480
Col-A	-18.8247	-13.431	-28.4429	-40.8151	-64.359	-75.9638	-83.5169	-86.5834	-91.1017	-91.1233	-90	-92.1211	-90	-89.076	-90	-86.5664	-87.7094		120 x 120mm Plate Maps
Col-A	-6.95296	-7.30576	-12.8043	-26.0754	-43.1524	-40.2364	-52.8153	-62.5256	-71.2587	-77.4712	-79.5923	-85.2364	-88.6361	-88.3634	-91.9749	-90	-92.0454
Col-A	-9.72758	-10.6849	-21.5014	-31.866	-45	-58.3925	-66.8014	-75.9638	-78.6901	-82.0304	-79.3803	-81.7406	-85.3645	-86.4965	-88.0909	-86.2686	-84.144
Col-A	17.0205	0	-7.43141	-17.8787	-37.6942	-40.6013	-49.3987	-59.5345	-69.7751	-71.8619	-75.2564	-79.992	-79.8245	-84.2894	-82.4054	-85.6013	-85.486
afb1-A	-5.85601	-12.9074	-17.9691	-32.8285	-46.1691	-57.1715	-68.6631	-76.293	-78.9298	-86.8202	-87.7974	-90	-91.4688	-92.3859	-93.3019	-96.254	-95.4403
afb1-A	-17.8189	-19.179	-28.0725	-35.1342	-48.3665	-56.7251	-64.9831	-70.3462	-78.2614	-81.1193	-81.1796	-85.0729	-79.8753	-79.2157	-76.8274	-75.9638	-72.1213
afb1-A	-16.8584	-16.3138	-22.751	-29.4759	-39.5597	-46.4688	-55.1247	-64.4861	-71.9166	-76.293	-76.9081	-79.796	-81.1193	-83.5169	-82.875	-85.486	-91.5074
afb1-A	-3.7314	-7.52382	-6.98106	-16.8584	-29.5388	-47.8624	-60.9454	-70.8664	-85.3893	-93.7314	-100.305	-105.422	-108.435	-101.889	-97.5238	-86.4237	-92.9357
t345-A	6.76617	1.4321	-8.29714	-11.3099	-24.0755	-29.5388	-30.0184	-41.6335	-44.3415	-59.0362	-58.8407	-60.4222	-57.9946	-65.1363	-67.9321	-66.8014	-66.5713
t345-A	6.24191	3.50353	3.01279	-3.81407	-10.204	-16.8214	-31.2637	-37.7468	-41.7295	-45	-54.4623	-61.8584	-52.8153	-62.6501	-59.3493	-62.488	-62.6501
t345-A	-14.444	-19.3845	-27.0309	-32.0054	-43.4518	-43.8767	-46.9749	-55.008	-53.6525	-57.875	-57.5288	-53.1301	-55.6197	-54.7824	-58.2405	-57.1715	-57.9946
t345-A	-4.51399	-6.34019	-15.9454	-25.821	-23.4287	-27.2996	-33.6901	-36.8699	-36.5289	-48.6522	-50.9645	-52.6506	-53.8418	-59.0362	-63.435	-68.1986	-66.5713
t1345-A	-15.3763	-20.6955	-26.565	-40.0608	-57.7244	-62.1027	-71.565	-75.9638	-78.1976	-84.2894	-81.3475	-85.2364	-82.0928	-79.5625	-73.8108	-76.2184	-67.8906
t1345-A	-8.93059	-6.4416	-4.08562	-10.4077	-17.0205	-21.2505	-28.393	-30.6997	-32.3807	-33.6901	-40.7636	-39.8056	-45	-49.3987	-48.4682	-49.1446	-45
t1345-A	-14.8586	-21.0375	-28.3008	-34.7778	-45	-46.3972	-54.8658	-61.3895	-59.0362	-63.435	-61.9275	-53.1301	-55.8403	-56.5922	-55.4375	-54.4623	-50.1944
t1345-A	-11.6115	-17.9045	-19.179	-29.9315	-34.8753	-39.4725	-41.8779	-50.5275	-49.6859	-60.9454	-70.641	-74.6499	-79.6951	-82.5686	-80.5377	-80.7539	-70.5234
tir1-A	0	5.82634	2.41951	1.14576	-4.20536	-15.0184	-30.1414	-37.5686	-42.337	-47.2906	-55.8403	-51.5463	-57.3808	-58.7816	-59.4703	-60.5241	-64.9831
tir1-A	-1.36393	-9.72758	-14.7436	-27.9795	-36.8699	-47.4896	-55.561	-62.1759	-62.5603	-69.3256	-64.9831	-73.54	-74.876	-81.1193	-85.5154	-92.3373	-90
tir1-A	-9.8193	-9.46232	-21.4477	-38.047	-45	-59.6209	-70.0169	-70.1448	-76.9307	-81.4692	-83.991	-90	-88.4089	-86.9059	-87.2737	-86.1215	-82.0928
tir1-A	5.49232	5.07961	-1.78991	-8.53077	-22.6199	-33.2317	-45	-58.861	-76.7595	-78.9591	-82.4054	-90	-96.1155	-97.125	-97.696	-104.036	-102.2
t1-A	-8.29714	-5.35583	-12.0115	-12.6804	-24.444	-32.1523	-48.5035	-60.8025	-68.7027	-80.8698	-83.991	-91.7098	-96.4831	-98.9726	-100.437	-104.676	-98.8418
t1-A	-10.4077	-15.124	-24.3045	-33.6901	-42.6141	-52.8153	-62.9691	-71.2413	-77.2547	-81.6071	-82.0928	-87.7543	-83.2902	-83.1572	-80.1342	-83.4802	-80.2724
t1-A	9.24611	3.46823	-1.10171	-3.36646	-12.7244	-31.2637	-35.7539	-45	-53.9726	-63.435	-69.8637	-77.9052	-82.0565	-91.3639	-95.4403	-98.9726	-93.8141
t1-A	3.81407	-4.18492	-9.21103	-21.541	-30.9638	-50.8263	-62.2415	-70.9744	-76.5348	-85.4261	-91.0809	-93.4336	-94.8991	-88.8767	-86.6335	-81.7029	-78.1113
1C7-A	-10.2222	-18.435	-23.9625	-40.0303	-45	-50.3893	-57.8477	-64.0256	-64.2307	-68.9625	-69.7174	-68.0704	-70.641	-72.4076	-70.821	-68.1986	-68.1986
1C7-A	-14.5345	-19.9831	-28.0725	-35.7539	-49.844	-59.0362	-62.2415	-64.6538	-64.6538	-72.646	-75.9638	-71.811	-75.9638	-79.5625	-78.4078	-78.3106	-79.2157
1C7-A	-11.3099	-18.9246	-27.8973	-43.6678	-54.2461	-59.3493	-64.179	-64.1336	-61.3895	-61.6992	-66.0375	-63.435	-64.179	-64.9831	-60.8025	-70.4269	-61.1892
1C7-A	-12.4259	-27.4744	-31.7595	-46.4688	-56.8887	-65.0561	-72.7185	-79.796	-77.4712	-81.3268	-82.1467	-83.5584	-87.337	-92.8624	-88.6678	-90	-91.7624
1C5-A	-6.65443	-14.0362	-30.2564	-40.2364	-63.435	-70.0169	-76.5514	-80.9605	-83.746	-85.1355	-92.9609	-94.9271	-98.7462	-96.809	-90	-91.5482	-86.3478
1C5-A	-5.07961	-14.5345	-26.0296	-41.5318	-60.0184	-75.0686	-75.6507	-82.6942	-85.2364	-88.727	-91.7624	-90	-90	-86.8779	-83.1572	-83.7965	-76.2184
1C5-A	-7.96961	-12.3391	-24.2278	-43.7811	-49.6859	-60.9454	-55.6197	-57.6526	-51.2419	-58.707	-57.0306	-60.124	-66.4477	-76.4641	-68.3852	-73.4127	-76.6755
1C5-A	0	1.63658	-6.07246	-22.0679	-40.4261	-58.6713	-66.1135	-76.8094	-70.292	-77.5926	-78.887	-84.2894	-85.8151	-90	-93.5763	-96.009	-97.5946
Plate A ∠	0.071	0	-0.22809	0	0	0	0	-0.03755	0	0	0.06356	0	0.13941	0	0	-0.18663	0
t1-B	-14.1985	-19.44	-26.565	-33.3407	-50.7106	-56.6336	-72.2996	-79.0459	-83.5412	-85.9144	-90	-90	-90	-88.8767	-84.8056	-85.3141	-82.5686
t1-B	5.19443	-1.21888	-1.34789	-8.91493	-18.0834	-30.7355	-41.5318	-49.3987	-58.3925	-57.875	-65.9245	-71.565	-72.4076	-79.5625	-80.9097	-90	-96.8428
t1-B	-1.87788	0	-11.0035	-14.4208	-24.1455	-28.1786	-36.6341	-45	-45.9094	-48.9909	-56.3099	-63.435	-69.9048	-71.222	-74.2488	-67.9321	-70.1148
t1-B	-2.60256	2.38594	2.00955	-3.27049	-12.3808	-26.0034	-40.9144	-48.8141	-63.435	-66.6444	-72.1213	-77.3474	-83.0189	-88.3153	-87.1844	-88.5679	-92.2026
Col-B	0	6.4416	-5.71059	-9.29331	-22.3801	-35.1342	-39.9204	-54.6052	-69.2744	-74.3205	-77.7352	-86.7295	-86.0548	-85.2364	-86.1859	-85.5154	-81.4164
Col-B	-3.63295	-2.663	-9.65989	-16.1892	-25.821	-36.4692	-43.9584	-58.2986	-70.3462	-68.1986	-72.4076	-74.4072	-77.4712	-78.4654	-74.5537	-75.5792	-75.2564
Col-B	-1.59114	1.05118	-13.7816	-15.7807	-33.1785	-52.3524	-62.8503	-70.9065	-80.5377	-77.9052	-86.6981	-88.5121	-87.3974	-88.8983	-87.0643	-82.6942	-80.2176
Col-B	-9.46232	-9.75242	-15.2551	-25.7693	-38.047	-48.3665	-53.427	-60.5725	-65.7722	-69.3256	-74.7449	-73.8355	-71.9166	-77.1957	-82.6476	-81.573	-84.4278
1C5-B	-8.65254	-7.85331	-17.7004	-28.2174	-36.1582	-53.8418	-56.7251	-66.0375	-74.876	-76.5514	-81.5289	-83.7965	-86.2483	-85.4622	-85.5154	-82.875	-83.6598
1C5-B	-1.24536	1.02303	-11.6336	-28.3008	-38.047	-56.3099	-64.7989	-70.9065	-75.9638	-75.5792	-77.6192	-80.3401	-77.5926	-82.4054	-77.2425	-79.1145	-82.304
1C5-B	2.93567	-1.00509	-8.91493	-30.5792	-45	-53.9726	-65.6589	-72.3499	-76.866	-78.8571	-80.0738	-82.0107	-79.6951	-80.9097	-76.293	-77.7995	-81.8699
1C5-B	-1.90915	-12.1715	-22.0679	-36.8699	-47.8624	-59.8586	-66.1398	-72.4076	-72.8241	-72.3874	-71.8781	-71.2413	-74.0546	-74.5214	-68.5232	-70.9065	-77.3474
t345-B	-7.30576	-15.9454	-23.5523	-31.7595	-43.0251	-46.9091	-53.8807	-59.2373	-63.435	-71.2413	-74.9816	-76.866	-74.9315	-77.7995	-74.3205	-75.1735	-82.0304
t345-B	-3.46823	-6.00901	-20.6744	-25.641	-27.646	-40.1009	-49.9392	-49.3987	-59.6568	-60.9454	-60.9454	-61.3895	-64.4861	-68.459	-64.359	-68.4986	-73.3008
t345-B	-2.68378	-3.57633	-13.7995	-18.8861	-21.8014	-34.2157	-45	-42.0892	-47.3533	-53.9726	-62.8787	-68.3852	-65.2976	-76.9081	-74.2193	-77.125	-80.5377
t345-B	-9.61973	-12.3391	-16.9908	-23.9625	-26.565	-32.3474	-40.4622	-41.1859	-56.7251	-52.8153	-55.9228	-63.435	-62.2415	-75.6186	-64.8552	-63.435	-68.5523
afb1-B	-7.35238	-11.5601	-15.1541	-29.0546	-37.9987	-51.8428	-64.0256	-71.9958	-76.1714	-81.1582	-84.6855	-84.8056	-82.875	-78.1113	-80.8698	-78.6901	-76.9081
afb1-B	-2.60256	-8.74616	-16.3895	-30.9638	-39.8056	-52.5946	-62.9494	-68.459	-74.2193	-78.1113	-81.7029	-85.3331	-83.5169	-90	-86.4237	-91.8476	-93.6522
afb1-B	0	-3.99091	-11.8215	-29.0546	-39.8056	-52.4314	-62.1759	-74.5388	-83.1572	-83.4181	-88.5679	-84.0355	-84.6442	-85.3645	-79.2869	-82.2348	-82.2348
afb1-B	-2.63243	-6.07246	-12.5288	-29.1975	-45	-52.4314	-74.5778	-83.4181	-90	-92.4895	-94.0856	-94.8645	-91.1935	-95.8067	-94.2364	-95.5275	-95.1944
tir1-B	-7.88314	-13.3245	-24.5901	-41.4237	-53.1301	-63.435	-74.1975	-76.2392	-78.2749	-77.1523	-76.5514	-71.1139	-71.565	-77.4712	-75.2032	-75.9638	-79.6951
tir1-B	-2.5448	-3.81407	-7.90716	-15.4222	-28.6105	-35.1342	-46.0809	-49.844	-56.0702	-62.9044	-69.5672	-71.9395	-76.4296	-77.9885	-80.2176	-82.2348	-79.796
tir1-B	-4.63546	-5.5722	-11.113	-14.4208	-25.3462	-39.8056	-53.3929	-55.4077	-60.7248	-61.6309	-71.565	-73.9264	-74.9816	-75.3236	-68.4287	-71.565	-75.5792
tir1-B	-25.3462	-34.8753	-35.3948	-48.3665	-69.2278	-66.9745	-78.1113	-83.7742	-88.9088	-90.8551	-91.1935	-92.7263	-93.0128	-91.302	-86.8779	-85.3645	-88.3634
t1345-B	6.34019	9.92625	6.54629	4.63546	-6.34019	-16.6992	-18.9246	-29.7449	-38.0189	-53.1301	-51.1466	-58.4652	-58.815	-65.2249	-59.2159	-69.2278	-67.249
t1345-B	-20.2565	-22.1664	-26.565	-34.5923	-43.727	-47.8624	-48.6914	-57.45	-66.413	-72.0721	-78.9965	-80.9097	-83.8298	-85.3141	-81.0274	-85.2364	-80.5377
t1345-B	-13.8514	-12.8043	-18.0343	-27.3499	-36.0274	-43.8767	-49.5739	-57.7244	-67.4569	-67.5572	-71.1468	-63.9704	-61.2602	-54.7276	-59.0362	-63.435	-60.9454
t1345-B	-28.1786	-29.3577	-30.6186	-40.0303	-50.1944	-56.8215	-57.7712	-69.444	-84.5597	-91.1458	-95.6176	-97.0165	-96.1155	-98.6525	-94.7636	-95.0425	-88.6361
1C7-B	-3.36646	-14.3493	-20.7256	-32.0054	-42.1376	-48.8141	-51.1466	-54.1179	-65.3231	-59.4703	-63.435	-65.7722	-67.249	-72.582	-70.1448	-70.71	-71.9958
1C7-B	3.13636	2.86241	-4.57392	-11.5922	-24.6236	-30.2564	-26.565	-28.5231	-29.7449	-36.2095	-34.0194	-37.1169	-33.6901	-43.8309	-35.5377	-38.2338	-39.0939
1C7-B	-7.92693	-11.5601	-25.7693	-37.5686	-46.4688	-50.5275	-55.4915	-60.141	-70.7505	-67.4569	-77.1957	-75.9638	-75.4258	-74.4759	-75.9638	-78.9298	-73.54
1C7-B	5.50548	2.48955	-5.04245	-14.0362	-20.3764	-29.9315	-36.3843	-40.3141	-45	-40.7462	-43.0909	-48.1221	-48.9909	-51.953	-52.0013	-62.6501	-58.1726
Plate B ∠	-0.10348	-0.15612	0	0	0.05557	-0.08655	-0.17812	-0.03454	-0.05213	0.49563	-0.09794	-0.06044	-0.04624	-0.16672	0	-0.06639	-0.16109
tir1-C	-18.2085	-11.0035	-12.8043	-17.5256	-28.4956	-36.6341	-45	-56.3099	-63.1456	-69.2459	-51.6325	-62.049	-67.6199	-76.5514	-82.2348	-81.4692	-83.6598
tir1-C	-21.0375	-27.5528	-39.2894	-53.8418	-66.0375	-73.0092	-79.0772	-81.5111	-79.9025	-80.3948	-83.8534	-86.8202	-83.2902	-86.4237	-86.6335	-80.3112	-83.047
tir1-C	0	1.30195	-11.5138	-19.9831	-37.4762	-56.7251	-58.2986	-69.7174	-80.0738	-80.0494	-83.1572	-84.5077	-85.8151	-87.1376	-85.5154	-85.6013	-88.4926
tir1-C	-3.09406	0	-5.90614	-10.008	-17.1027	-33.3106	-36.4692	-52.2532	-66.529	-71.565	-76.8274	-79.2611	-85.3645	-85.9144	-90	-84.144	-84.8056
t1-C	-5.19443	-1.70981	-8.00473	-18.9246	-29.4759	-39.9869	-49.7636	-61.2602	-69.5377	-75.1414	-80.7539	-83.991	-91.6847	-95.8774	-93.0128	-96.2035	-98.7462
t1-C	-7.85331	-13.431	-14.0362	-27.8241	-41.0091	-52.7652	-64.5366	-73.664	-81.9829	-85.0303	-90	-90	-95.3145	-93.9909	-92.7263	-94.3987	-88.8983
t1-C	1.00509	10.7843	5.61758	11.3099	5.82634	1.76239	-1.4321	-8.65254	-8.97263	-17.6126	-36.573	-45	-54.6375	-58.2405	-66.0375	-71.565	-75.3791
t1-C	-11.441	-14.25	-20.2249	-25.9744	-32.7352	-45	-49.5378	-53.1301	-61.0323	-65.2249	-66.6444	-62.8189	-68.5523	-76.6075	-72.4076	-79.5085	-79.3151
1C7-C	-16.7826	-29.5778	-41.6335	-53.8068	-61.6992	-70.71	-75.0686	-73.7798	-74.2193	-74.5214	-77.4712	-78.4399	-82.2348	-80.9605	-83.8534	-79.5923	-83.3675
1C7-C	-52.3058	-60.1011	-71.9958	-79.2157	-81.6744	-85.3645	-88.4089	-87.7543	-88.8983	-87.5105	-86.4237	-90	-91.8183	-93.9452	-93.8141	-90	-88.7546
1C7-C	9.6052	3.2397	-8.47114	-21.5014	-32.7352	-46.1233	-43.1524	-54.4623	-50.1944	-63.9704	-69.444	-59.0362	-60.9454	-70.0169	-66.218	-74.2914	-71.565
1C7-C	3.71529	-2.89858	-12.5288	-24.3045	-32.6192	-34.439	-35.7539	-39.3693	-51.7098	-48.0128	-54.4623	-62.0205	-70.1448	-73.6105	-71.822	-69.444	-78.0239
1C5-C	-4.26789	-7.12502	-13.134	-41.6335	-47.1211	-60.1011	-69.5901	-70.2777	-75.2564	-72.9795	-72.0309	-70.56	-76.4296	-75.1735	-74.3577	-79.1145	-78.6901
1C5-C	-4.4556	-5.90614	-16.5044	-34.6951	-41.0091	-55.3049	-60.5725	-65.6954	-72.2553	-74.7449	-76.7595	-75.9638	-79.9194	-78.6901	-77.0054	-73.6861	-70.641
1C5-C	0	-4.76364	-20.556	-34.6951	-50.7106	-59.3493	-72.8973	-71.565	-74.8989	-75.4258	-77.4712	-77.9885	-80.5377	-79.0459	-81.7029	-89.0122	-90
1C5-C	-25.0169	-25.0836	-33.1785	-41.4965	-62.6501	-71.1468	-82.4054	-86.0091	-90.8952	-91.9091	-86.6335	-87.6627	-85.8404	-79.3803	-79.9194	-82.4054	-88.9391
Col-C	-12.9074	-25.7099	-36.5289	-51.1155	-65.8545	-71.565	-74.4759	-77.9885	-82.6942	-79.796	-85.3141	-87.4552	-92.7702	-94.6355	-97.5238	-96.4831	-95.5993
Col-C	-3.43363	-11.6336	-11.6894	-30.0686	-34.8245	-42.1376	-53.4711	-59.0362	-60.5928	-61.8584	-62.6501	-59.5345	-57.3391	-63.435	-54.7824	-53.1301	-59.3493
Col-C	-6.07246	-12.2648	-20.556	-37.875	-48.8141	-57.0948	-62.2415	-69.7174	-80.3401	-81.9953	-84.8056	-86.8202	-91.0051	-93.5035	-96.2258	-103.325	-98.8204
Col-C	-1.14576	-11.6336	-12.0948	-29.9816	-38.6598	-41.6335	-55.9541	-56.3099	-61.3895	-63.435	-69.3046	-69.7751	-68.8387	-79.992	-84.6442	-82.0304	-81.0851
afb1-C	-7.59464	-16.8584	-22.1094	-38.6598	-55.7131	-60.7086	-78.8708	-83.4181	-93.1798	-97.125	-101.768	-107.354	-109.058	-107.103	-105.018	-113.839	-113.962
afb1-C	-14.5742	-21.8014	-30.6997	-45	-54.8658	-70.0962	-80.3112	-79.2157	-86.4237	-91.9749	-90	-91.1935	-91.0609	-88.5679	-91.1935	-91.6847	-94.6355
afb1-C	-8.91493	-16.5044	-26.565	-42.1376	-57.3808	-61.9275	-66.9745	-75.2032	-82.2664	-82.6942	-83.6598	-86.3478	-83.7742	-86.9872	-83.1572	-85.3645	-82.5686
afb1-C	-8.42697	-13.3487	-21.0375	-33.2749	-43.6028	-54.7824	-62.8189	-70.292	-77.3914	-80.5377	-85.2364	-85.6013	-87.1376	-84.4007	-87.4552	-84.2894	-83.991
t345-C	-9.68879	-9.30994	-19.2127	-37.1169	-41.1859	-51.7662	-58.0919	-64.5366	-68.5232	-70.2532	-76.9081	-78.6901	-85.7946	-84.4007	-87.0643	-91.6847	-96.7098
t345-C	-9.32359	-7.59464	-20.7256	-43.6678	-48.0128	-62.0205	-64.5366	-68.4287	-73.5596	-76.5514	-75.9638	-76.5043	-78.887	-84.8056	-81.3475	-84.144	-87.4552
t345-C	-22.5206	-27.512	-41.8202	-54.0903	-63.435	-65.1363	-78.9965	-75.5297	-78.8262	-81.0851	-79.3803	-82.875	-82.1169	-85.3331	-84.1226	-87.1376	-86.0995
t345-C	-6.1155	-5.2624	-15.6423	-21.8014	-25.641	-33.2317	-42.3974	-42.9786	-54.9406	-60.7086	-64.1336	-65.8209	-66.0375	-63.435	-65.3764	-67.249	-67.9887
t1345-C	-7.43141	-14.6209	-23.0513	-31.7014	-48.5763	-53.1301	-63.435	-64.44	-68.6294	-71.9657	-76.2392	-79.177	-83.4181	-84.6107	-83.2902	-78.3664	-80.7539
t1345-C	-5.80673	-6.54629	-10.1247	-17.7447	-27.2996	-34.0459	-49.6355	-43.4518	-49.8991	-45.9392	-48.0128	-45.9392	-53.6732	-60.6422	-65.3231	-70.4634	-78.1785
t1345-C	-8.23562	-12.0115	-10.4599	-15.2551	-22.3062	-35.3625	-50.0425	-48.5035	-64.9164	-69.1932	-75.3236	-80.7539	-86.0091	-92.7927	-97.275	-98.5308	-102.875
t1345-C	-10.823	-13.0919	-12.8356	-10.008	-20.9245	-28.2174	-36.6341	-46.0051	-53.5691	-60.4222	-64.5923	-69.6769	-74.0546	-79.5085	-87.0643	-88.0909	-92.4895
Plate C ∠	0.03504	-0.35286	-0.26115	-0.25185	-0.09991	-0.10811	-0.16464	-0.04241	-0.07908	-0.08087	0.03404	0	0.12948	-0.0569	-0.06813	-0.31831	-0.28576
afb1-D	15.2551	18.435	15.7807	4.66686	-1.10171	-16.1134	-30.4111	-38.5169	-55.7131	-60.9454	-69.9048	-74.2193	-78.8708	-82.4054	-87.5633	-88.1817	-90
afb1-D	-8.91493	-10.4375	-15.5241	-32.1957	-47.6425	-59.8265	-65.2249	-75.9638	-82.0107	-86.4237	-88.0909	-87.337	-86.5664	-91.6847	-90	-90.924	-88.9584
afb1-D	0	0	-4.96974	-12.7244	-24.6236	-35.7067	-45.8814	-57.8477	-67.6199	-75.4258	-79.8245	-80.2724	-83.991	-82.4054	-84.0531	-86.3086	-85.1009
afb1-D	-3.57633	-12.8043	-20.4328	-36.1582	-50.3558	-64.7989	-72.646	-85.6013	-89.2043	-92.7263	-94.1849	-93.1798	-93.1798	-90	-86.9059	-90.9392	-86.9059
tir1-D	-3.52145	-2.43665	-13.0693	-28.8866	-33.6901	-45	-45.971	-56.6115	-62.8503	-66.6823	-73.3008	-75.5792	-77.1957	-78.4654	-82.7468	-85.3893	-83.6598
tir1-D	-7.38604	-12.6804	-20.4328	-35.7067	-49.844	-64.44	-68.587	-74.5388	-78.4862	-82.0928	-84.4278	-84.0939	-83.6598	-82.0304	-78.2749	-80.9605	-85.6013
tir1-D	-14.6973	-30.1414	-37.4762	-48.8141	-63.435	-70.3462	-83.3675	-87.6785	-90	-93.5763	-97.2369	-93.9452	-91.8476	-93.7314	-90	-92.3859	-90
tir1-D	-7.12502	-13.7363	-24.0755	-39.8056	-50.0131	-61.3895	-65.7722	-78.5305	-79.439	-84.0939	-84.4278	-83.9275	-85.9144	-87.4552	-84.447	-87.2737	-84.9869
t1345-D	-13.1725	-17.9045	-30.5792	-34.0194	-49.1446	-56.3099	-63.8861	-76.866	-83.4802	-86.9059	-92.2457	-92.663	-91.2189	-90	-85.9858	-83.991	-85.2364
t1345-D	-9.24611	-14.6209	-23.1986	-29.7449	-43.6028	-49.5378	-53.1301	-58.4652	-60.9454	-60.141	-63.9046	-65.1363	-70.2011	-72.2996	-72.4076	-69.7174	-70.56
t1345-D	-8.1301	-1.4321	-7.12502	-12.7575	-21.0375	-29.7449	-36.8699	-39.9575	-48.0128	-50.856	-51.3402	-59.4703	-60.1011	-58.815	-63.435	-63.435	-56.8887
t1345-D	5.55297	4.66686	1.48787	-9.68879	-23.4287	-30.9638	-34.3302	-32.4123	-45	-49.8208	-56.6115	-56.3099	-60.2551	-59.0362	-61.3895	-62.1759	-67.0113
1C7-D	-25.4077	-27.5528	-44.1931	-60.1011	-63.435	-66.8014	-72.4744	-63.435	-67.3801	-72.2553	-65.8209	-61.6992	-72.4744	-72.4076	-77.6609	-70.71	-74.7449
1C7-D	-14.3003	-25.8664	-30.5792	-50.1944	-57.0948	-60.2551	-62.0205	-65.556	-67.9638	-67.0679	-71.9166	-72.646	-75.2564	-79.1597	-84.2894	-80.2176	-81.2538
1C7-D	-6.70984	-14.9314	-24.9439	-38.3675	-49.9697	-58.7816	-59.6209	-65.0561	-65.0561	-63.435	-64.9831	-57.9946	-65.8978	-65.7722	-74.876	-78.9965	-77.7995
1C7-D	-5.85601	-15.3763	-25.7099	-38.047	-52.2532	-49.2364	-62.5924	-69.6769	-69.9048	-60.5725	-59.0362	-59.3003	-72.2996	-69.0755	-75.9638	-77.5926	-75.0686
t1-D	-1.59114	-6.34019	-14.0362	-21.413	-30.9638	-41.9872	-52.8831	-65.1363	-74.2488	-75.7189	-79.5625	-78.0239	-82.875	-80.5377	-78.1785	-77.125	-77.4712
t1-D	4.70785	4.57392	7.23692	5.52754	-1.59114	-8.1301	-18.435	-37.6942	-50.1944	-56.7251	-67.8906	-78.6901	-80.5377	-87.2073	-92.0826	-93.0128	-102.2
t1-D	8.53077	7.38604	5.59934	-10.008	-24.9048	-43.0251	-60.6422	-71.1139	-75.4655	-79.3803	-79.796	-81.6341	-88.2643	-88.0909	-90	-93.1798	-95.5722
t1-D	8.6955	11.1429	16.7626	6.4416	1.4321	-6.48307	-17.5256	-23.9625	-30.1735	-38.4802	-44.2361	-55.7843	-65.6954	-67.8337	-74.876	-79.5085	-77.9052
Col-D	2.52612	-2.1211	-4.03771	-16.0908	-21.8014	-39.1737	-46.0416	-55.2441	-60.1011	-68.8059	-76.7014	-77.4712	-79.4608	-78.6901	-77.5741	-81.1582	-76.5514
Col-D	12.2005	4.92711	-2.91084	-15.9454	-34.6951	-48.6522	-62.3005	-72.646	-80.3401	-85.3141	-88.1524	-90	-88.6361	-91.3972	-90	-90	-84.6855
Col-D	1.87788	-3.52145	-14.9951	-28.1786	-41.8202	-51.3402	-61.1134	-65.9245	-71.2001	-77.3004	-82.725	-86.6335	-86.3478	-84.9869	-81.8699	-82.5686	-81.8699
Col-D	1.1233	-6.17018	-15.9454	-30.6997	-30.9638	-47.2906	-54.6375	-64.5923	-63.0605	-68.3852	-66.541	-66.3706	-70.821	-81.4164	-79.3803	-76.5043	-78.4078
1C5-D	-8.1301	-10.204	-18.0834	-33.6901	-39.8056	-48.3665	-58.7816	-65.1363	-70.0962	-71.2587	-71.822	-73.1786	-78.2317	-81.4692	-80.1342	-82.5041	-85.2364
1C5-D	-2.68378	-10.4077	-18.8532	-34.1597	-42.5104	-48.9909	-47.9108	-52.9072	-53.3103	-54.9263	-59.8586	-65.7722	-66.9745	-73.0725	-71.1753	-76.2392	-66.5713
1C5-D	-4.83042	-11.6894	-21.1941	-43.7811	-65.8545	-76.5043	-80.1342	-87.9904	-88.172	-88.4725	-92.7702	-92.663	-88.4926	-87.8789	-87.7974	-87.9546	-83.9275
1C5-D	-1.76239	-14.6764	-17.4748	-27.4076	-33.1785	-30.9638	-37.5686	-39.0355	-41.8779	-43.7811	-53.1301	-51.7662	-72.4076	-72.646	-67.6199	-78.3664	-72.8973
t345-D	-21.4477	-20.9245	-27.4744	-36.1582	-43.1524	-45	-43.9191	-46.4943	-50.0425	-56.3099	-49.3987	-54.2461	-53.1301	-56.6894	-62.1759	-60.9454	-52.6506
t345-D	-18.1381	-24.7751	-30.6997	-40.0303	-51.5819	-55.3049	-60.1011	-68.4986	-68.6294	-74.7449	-75.2564	-79.0459	-83.8845	-85.4261	-88.3634	-85.9144	-85.486
t345-D	-18.0042	-22.249	-32.1523	-47.8624	-63.435	-69.444	-74.876	-77.7352	-78.6901	-83.2902	-82.1847	-78.6901	-79.8245	-81.2538	-83.991	-84.6442	-82.6942
t345-D	-10.6197	-14.0362	-27.4076	-40.3645	-48.3665	-60.4612	-64.9831	-74.2193	-77.3196	-77.2756	-79.796	-75.5792	-77.9052	-75.5792	-78.9591	-77.6192	-79.992
Plate D ∠	-0.28701	-0.26428	-0.12012	-0.3044	-0.19502	-0.2154	0	-0.19975	-0.12914	-0.15309	-0.17975	-0.04978	-0.05026	-0.12866	-0.17999	-0.32344	0
Corrected angles																		30-0	60-30	90-60	120-90	150-120	180-150	210-180	240-210	270-240	300-270	330-300	360-330	390-360	420-390	450-420	480-450
Col-A	18.8957	13.431	28.2148	40.8151	64.359	75.9638	83.5169	86.5459	91.1017	91.1233	90.0636	92.1211	90.1394	89.076	90	86.3797	87.7094	-5.46468	14.7838	12.6002	23.5439	11.6048	7.55317	3.02893	4.55585	0.02159	-1.05974	2.05754	-1.98169	-1.06346	0.92405	-3.62026	1.32965
Col-A	7.02396	7.30576	12.5762	26.0754	43.1524	40.2364	52.8153	62.488	71.2587	77.4712	79.6559	85.2364	88.7755	88.3634	91.9749	89.8134	92.0454	0.2818	5.27042	13.4992	17.077	-2.91603	12.5789	9.67273	8.77064	6.21253	2.18466	5.58051	3.53912	-0.41206	3.61151	-2.16156	2.23204
Col-A	9.79858	10.6849	21.2733	31.866	45	58.3925	66.8014	75.9262	78.6901	82.0304	79.4439	81.7406	85.504	86.4965	88.0909	86.082	84.144	0.88633	10.5884	10.5926	13.134	13.3925	8.40891	9.1248	2.76386	3.34032	-2.58649	2.29666	3.76339	0.99252	1.59438	-2.00888	-1.93798
Col-A	-16.9495	0	7.20332	17.8787	37.6942	40.6013	49.3987	59.4969	69.7751	71.8619	75.32	79.992	79.9639	84.2894	82.4054	85.4147	85.486	16.9495	7.20332	10.6754	19.8155	2.90705	8.79742	10.0982	10.2782	2.08678	3.45808	4.67202	-0.02812	4.32551	-1.88405	3.0093	0.07135
afb1-A	5.92701	12.9074	17.741	32.8285	46.1691	57.1715	68.6631	76.2555	78.9298	86.8202	87.861	90	91.6082	92.3859	93.3019	96.0674	95.4403	6.9804	4.83364	15.0875	13.3406	11.0023	11.4917	7.59235	2.67431	7.89037	1.04079	2.13904	1.60821	0.77773	0.91593	2.76553	-0.62707
afb1-A	17.8899	19.179	27.8444	35.1342	48.3665	56.7251	64.9831	70.3086	78.2614	81.1193	81.2432	85.0729	80.0147	79.2157	76.8274	75.7771	72.1213	1.28912	8.66539	7.28979	13.2323	8.35865	8.258	5.32552	7.9528	2.85791	0.12384	3.82971	-5.05815	-0.79904	-2.38825	-1.05032	-3.65583
afb1-A	16.9294	16.3138	22.5229	29.4759	39.5597	46.4688	55.1247	64.4486	71.9166	76.293	76.9717	79.796	81.2587	83.5169	82.875	85.2994	91.5074	-0.61555	6.20904	6.953	10.0838	6.90913	8.65587	9.32391	7.46797	4.37649	0.67863	2.82436	1.46272	2.25818	-0.64195	2.4244	6.20806
afb1-A	3.8024	7.52382	6.75297	16.8584	29.5388	47.8624	60.9454	70.8288	85.3893	93.7314	100.368	105.422	108.574	101.889	97.5238	86.237	92.9357	3.72142	-0.77085	10.1054	12.6804	18.3236	13.083	9.88341	14.5605	8.34205	6.63701	5.05375	3.1522	-6.6857	-4.36484	-11.2868	6.69863
t345-A	-6.69517	-1.4321	8.06905	11.3099	24.0755	29.5388	30.0184	41.596	44.3415	59.0362	58.9043	60.4222	58.134	65.1363	67.9321	66.6148	66.5713	5.26307	9.50115	3.24088	12.7656	5.46328	0.47959	11.5776	2.74547	14.6948	-0.13198	1.5179	-2.28813	7.00227	2.7958	-1.31732	-0.04347
t345-A	-6.17091	-3.50353	-3.24088	3.81407	10.204	16.8214	31.2637	37.7093	41.7295	45	54.5259	61.8584	52.9547	62.6501	59.3493	62.3014	62.6501	2.66738	0.26265	7.05495	6.3899	6.61744	14.4423	6.44553	4.02025	3.27049	9.52588	7.33252	-8.9037	9.69542	-3.30079	2.95204	0.34875
t345-A	14.515	19.3845	26.8028	32.0054	43.4518	43.8767	46.9749	54.9704	53.6525	57.875	57.5924	53.1301	55.7591	54.7824	58.2405	56.9848	57.9946	4.86948	7.41825	5.20261	11.4465	0.42486	3.09823	7.9955	-1.31789	4.22246	-0.28263	-4.46227	2.62897	-0.97666	3.45811	-1.25569	1.00979
t345-A	4.58499	6.34019	15.7173	25.821	23.4287	27.2996	33.6901	36.8323	36.5289	48.6522	51.0281	52.6506	53.9812	59.0362	63.435	68.012	66.5713	1.7552	9.37712	10.1037	-2.3923	3.87088	6.3905	3.14228	-0.30349	12.1234	2.37583	1.6226	1.33057	5.05502	4.39871	4.57701	-1.44065
t1345-A	15.4473	20.6955	26.337	40.0608	57.7244	62.1027	71.565	75.9262	78.1976	84.2894	81.411	85.2364	82.2322	79.5625	73.8108	76.0318	67.8906	5.2482	5.64151	13.7238	17.6636	4.37837	9.46232	4.36116	2.27136	6.09184	-2.87839	3.82534	-3.00411	-2.66973	-5.75173	2.22098	-8.14122
t1345-A	9.00159	6.4416	3.85753	10.4077	17.0205	21.2505	28.393	30.6622	32.3807	33.6901	40.8272	39.8056	45.1394	49.3987	48.4682	48.958	45	-2.55999	-2.58407	6.55018	6.61282	4.22998	7.14251	2.26915	1.71851	1.30939	7.1371	-1.0216	5.33384	4.2593	-0.93048	0.48976	-3.95799
t1345-A	14.9296	21.0375	28.0727	34.7778	45	46.3972	54.8658	61.352	59.0362	63.435	61.9911	53.1301	55.9797	56.5922	55.4375	54.2757	50.1944	6.1079	7.03516	6.70516	10.2222	1.39718	8.46863	6.48618	-2.31575	4.39871	-1.44388	-8.86097	2.84962	0.61246	-1.1547	-1.16179	-4.08126
t1345-A	11.6825	17.9045	18.9509	29.9315	34.8753	39.4725	41.8779	50.49	49.6859	60.9454	70.7046	74.6499	79.8346	82.5686	80.5377	80.5673	70.5234	6.22196	1.04647	10.9806	4.94382	4.59713	2.40541	8.61212	-0.80409	11.2595	9.75917	3.94529	5.1847	2.73403	-2.03091	0.02958	-10.0438
tir1-A	0.071	-5.82634	-2.6476	-1.14576	4.20536	15.0184	30.1414	37.531	42.337	47.2906	55.9039	51.5463	57.5202	58.7816	59.4703	60.3375	64.9831	-5.89734	3.17874	1.50184	5.35112	10.813	15.123	7.38965	4.80596	4.95361	8.61326	-4.35758	5.97388	1.26143	0.68869	0.86719	4.64563
tir1-A	1.43493	9.72758	14.5155	27.9795	36.8699	47.4896	55.561	62.1383	62.5603	69.3256	65.0467	73.54	75.0154	81.1193	85.5154	92.1507	90	8.29265	4.78789	13.464	8.89043	10.6197	8.07146	6.57734	0.42192	6.76531	-4.27891	8.49332	1.47541	6.10394	4.39605	6.63529	-2.15068
tir1-A	9.8903	9.46232	21.2196	38.047	45	59.6209	70.0169	70.1072	76.9307	81.4692	84.0545	90	88.5483	86.9059	87.2737	85.9349	82.0928	-0.42798	11.7573	16.8274	6.95296	14.6209	10.396	0.09035	6.82344	4.53855	2.58532	5.94545	-1.45173	-1.64233	0.36775	-1.33884	-3.84201
tir1-A	-5.42132	-5.07961	1.56182	8.53077	22.6199	33.2317	45	58.8235	76.7595	78.9591	82.4689	90	96.2549	97.125	97.696	103.85	102.2	0.34171	6.64143	6.96895	14.0891	10.6119	11.7683	13.8235	17.936	2.19958	3.50986	7.53108	6.25491	0.87011	0.57103	6.15356	-1.64914
t1-A	8.36814	5.35583	11.7834	12.6804	24.444	32.1523	48.5035	60.765	68.7027	80.8698	84.0545	91.7098	96.6225	98.9726	100.437	104.49	98.8418	-3.01231	6.42756	0.89699	11.7636	7.70835	16.3512	12.2614	7.93769	12.1672	3.18473	7.65526	4.91267	2.35015	1.46485	4.05228	-5.64795
t1-A	10.4787	15.124	24.0765	33.6901	42.6141	52.8153	62.9691	71.2038	77.2547	81.6071	82.1564	87.7543	83.4296	83.1572	80.1342	83.2936	80.2724	4.6453	8.95245	9.61361	8.92399	10.2012	10.1539	8.23466	6.05091	4.35236	0.54933	5.59786	-4.32469	-0.27234	-3.02304	3.15938	-3.02115
t1-A	-9.17511	-3.46823	0.87362	3.36646	12.7244	31.2637	35.7539	44.9624	53.9726	63.435	69.9273	77.9052	82.1959	91.3639	95.4403	98.786	93.8141	5.70688	4.34185	2.49284	9.3579	18.5394	4.49016	9.20856	9.01018	9.46232	6.49231	7.97798	4.2907	9.16799	4.0764	3.34567	-4.97193
t1-A	-3.74307	4.18492	8.98294	21.541	30.9638	50.8263	62.2415	70.9368	76.5348	85.4261	91.1445	93.4336	95.0385	88.8767	86.6335	81.5162	78.1113	7.92799	4.79802	12.558	9.42278	19.8626	11.4151	8.69538	5.59795	8.89129	5.7184	2.28915	1.60487	-6.1618	-2.24316	-5.11731	-3.40489
1C7-A	10.2932	18.435	23.7344	40.0303	45	50.3893	57.8477	63.9881	64.2307	68.9625	69.781	68.0704	70.7804	72.4076	70.821	68.012	68.1986	8.14178	5.29945	16.2959	4.96974	5.38931	7.45839	6.14036	0.24261	4.73182	0.81851	-1.71059	2.71001	1.62716	-1.58659	-2.80903	0.18663
1C7-A	14.6055	19.9831	27.8444	35.7539	49.844	59.0362	62.2415	64.6163	64.6538	72.646	76.0273	71.811	76.1032	79.5625	78.4078	78.124	79.2157	5.37765	7.86129	7.90949	14.0901	9.19224	3.20522	2.37481	0.03755	7.99216	3.38134	-4.21637	4.29222	3.45935	-1.1547	-0.28382	1.0917
1C7-A	11.3809	18.9246	27.6692	43.6678	54.2461	59.3493	64.179	64.0961	61.3895	61.6992	66.1011	63.435	64.3184	64.9831	60.8025	70.2402	61.1892	7.54371	8.74454	15.9986	10.5783	5.10322	4.82968	-0.08292	-2.70655	0.3097	4.40183	-2.66612	0.88347	0.66469	-4.1806	9.43773	-9.05103
1C7-A	12.4969	27.4744	31.5314	46.4688	56.8887	65.0561	72.7185	79.7585	77.4712	81.3268	82.2103	83.5584	87.4764	92.8624	88.6678	89.8134	91.7624	14.9775	4.05696	14.9374	10.4199	8.16743	7.66241	7.03998	-2.28729	3.85564	0.88342	1.34815	3.91801	5.386	-4.19463	1.14559	1.94902
1C5-A	6.72543	14.0362	30.0283	40.2364	63.435	70.0169	76.5514	80.923	83.746	85.1355	93.0245	94.9271	98.8856	96.809	90	91.3615	86.3478	7.31081	15.9921	10.208	23.1986	6.58194	6.53449	4.37159	2.823	1.38952	7.88901	1.90261	3.95846	-2.07652	-6.80905	1.36153	-5.01375
1C5-A	5.15061	14.5345	25.8015	41.5318	60.0184	75.0686	75.6507	82.6567	85.2364	88.727	91.8259	90	90.1394	86.8779	83.1572	83.6099	76.2184	9.38385	11.267	15.7303	18.4866	15.0502	0.58209	7.00602	2.57967	3.49061	3.09898	-1.82595	0.13941	-3.26154	-3.72064	0.45269	-7.39152
1C5-A	8.04061	12.3391	23.9997	43.7811	49.6859	60.9454	55.6197	57.615	51.2419	58.707	57.0942	60.124	66.5871	76.4641	68.3852	73.226	76.6755	4.29848	11.6606	19.7815	5.90478	11.2595	-5.32574	1.99535	-6.3731	7.46505	-1.6128	3.02985	6.46314	9.87699	-8.07892	4.84081	3.44944
1C5-A	0.071	-1.63658	5.84437	22.0679	40.4261	58.6713	66.1135	76.7718	70.292	77.5926	78.9505	84.2894	85.9545	90	93.5763	95.8224	97.5946	-1.70758	7.48095	16.2235	18.3582	18.2452	7.44219	10.6583	-6.47982	7.30056	1.35794	5.33889	1.66508	4.04551	3.57633	2.24605	1.77226
t1-B	14.0951	19.2839	26.565	33.3407	50.7662	56.5471	72.1214	79.0114	83.489	86.41	89.9021	89.9396	89.9538	88.71	84.8056	85.2477	82.4075	5.18884	7.28114	6.77566	17.4255	5.78092	15.5744	6.88995	4.47765	2.92096	3.49205	0.0375	0.0142	-1.24378	-3.90441	0.44214	-2.84021
t1-B	-5.29791	1.06276	1.34789	8.91493	18.139	30.6489	41.3537	49.3642	58.3404	58.3706	65.8266	71.5046	72.3613	79.3958	80.9097	89.9336	96.6817	6.36067	0.28513	7.56704	9.22409	12.5099	10.7047	8.01052	8.9762	0.03026	7.45593	5.67805	0.85673	7.03446	1.51392	9.02389	6.74807
t1-B	1.7744	-0.15612	11.0035	14.4208	24.2011	28.092	36.456	44.9655	45.8573	49.4865	56.212	63.3745	69.8585	71.0553	74.2488	67.8657	69.9537	-1.93052	11.1597	3.41723	9.78034	3.89093	8.36395	8.50947	0.89179	3.62929	6.72545	7.16252	6.48402	1.19672	3.19358	-6.38312	2.08803
t1-B	2.49908	-2.54206	-2.00955	3.27049	12.4363	25.9168	40.7363	48.7795	63.3828	67.1401	72.0234	77.287	82.9727	88.1486	87.1844	88.5015	92.0415	-5.04114	0.53251	5.28004	9.16584	13.4805	14.8195	8.04327	14.6033	3.75725	4.88329	5.26364	5.6857	5.1759	-0.96416	1.31707	3.54
Col-B	-0.10348	-6.59772	5.71059	9.29331	22.4357	35.0476	39.7423	54.5707	69.2223	74.8161	77.6373	86.6691	86.0086	85.0696	86.1859	85.449	81.2553	-6.49424	12.3083	3.58272	13.1424	12.6119	4.69463	14.8284	14.6516	5.5938	2.82118	9.03178	-0.6605	-0.93893	1.11629	-0.73693	-4.19371
Col-B	3.52947	2.50688	9.65989	16.1892	25.8766	36.3827	43.7803	58.264	70.294	68.6942	72.3096	74.3468	77.425	78.2987	74.5537	75.5128	75.0953	-1.02259	7.15301	6.52932	9.68735	10.5061	7.39757	14.4838	12.03	-1.59983	3.61542	2.03711	3.0782	0.87371	-3.74498	0.95916	-0.41749
Col-B	1.48766	-1.2073	13.7816	15.7807	33.2341	52.2658	62.6722	70.872	80.4855	78.4009	86.6002	88.4517	87.3512	88.7316	87.0643	82.6278	80.0565	-2.69496	14.9889	1.99915	17.4533	19.0317	10.4064	8.19977	9.61358	-2.08468	8.19932	1.8515	-1.10049	1.38037	-1.66724	-4.43648	-2.57135
Col-B	9.35884	9.5963	15.2551	25.7693	38.1026	48.2799	53.2488	60.538	65.7201	69.8212	74.6469	73.7751	71.8703	77.029	82.6476	81.5066	84.2667	0.23746	5.65882	10.5142	12.3333	10.1773	4.96894	7.28915	5.18212	4.10109	4.82573	-0.87188	-1.90475	5.1587	5.61861	-1.14098	2.76007
1C5-B	8.54906	7.69719	17.7004	28.2174	36.2138	53.7553	56.547	66.003	74.8239	77.047	81.4309	83.7361	86.202	85.2955	85.5154	82.8086	83.4987	-0.85187	10.0032	10.5169	7.9964	17.5415	2.79173	9.45598	8.82089	2.22315	4.38391	2.30519	2.46592	-0.90652	0.21988	-2.7068	0.69013
1C5-B	1.14188	-1.17915	11.6336	28.3008	38.1026	56.2234	64.6208	70.872	75.9116	76.0749	77.5213	80.2797	77.5463	82.2386	77.2425	79.0481	82.1429	-2.32103	12.8128	16.6671	9.80185	18.1208	8.39738	6.25121	5.03966	0.16323	1.44644	2.75837	-2.73333	4.6923	-4.99617	1.80561	3.09478
1C5-B	-3.03915	0.84897	8.91493	30.5792	45.0556	53.8861	65.4808	72.3153	76.8138	79.3527	79.9758	81.9502	79.6489	80.743	76.293	77.7331	81.7088	3.88812	8.06596	21.6643	14.4763	8.83051	11.5947	6.83455	4.49851	2.53889	0.62307	1.97442	-2.30132	1.09409	-4.44996	1.4401	3.97567
1C5-B	1.80567	12.0153	22.0679	36.8699	47.918	59.7721	65.9617	72.373	72.772	72.8831	71.7802	71.1809	74.0084	74.3546	68.5232	70.8401	77.1864	10.2097	10.0526	14.802	11.0481	11.8541	6.18964	6.41134	0.39893	0.11108	-1.10285	-0.59929	2.82745	0.34628	-5.83143	2.31691	6.34623
t345-B	7.20228	15.7893	23.5523	31.7595	43.0806	46.8226	53.7025	59.2027	63.3828	71.737	74.8837	76.8055	74.8853	77.6328	74.3205	75.1071	81.8693	8.587	7.76298	8.20722	11.3212	3.74196	6.87994	5.5002	4.18008	8.35416	3.14672	1.92184	-1.92027	2.74754	-3.31233	0.78665	6.76217
t345-B	3.36475	5.85289	20.6744	25.641	27.7016	40.0144	49.7611	49.3642	59.6046	61.441	60.8475	61.3291	64.4399	68.2923	64.359	68.4322	73.1397	2.48814	14.8215	4.96659	2.06054	12.3128	9.74674	-0.39693	10.2405	1.83641	-0.59357	0.48164	3.11079	3.85241	-3.93331	4.07319	4.70749
t345-B	2.5803	3.42021	13.7995	18.8861	21.857	34.1291	44.8219	42.0546	47.3012	54.4683	62.7808	68.3248	65.2513	76.7414	74.2193	77.0586	80.3766	0.83991	10.3793	5.0866	2.97089	12.2722	10.6927	-2.76726	5.24655	7.16709	8.3125	5.54402	-3.07345	11.4901	-2.52214	2.83936	3.31798
t345-B	9.51625	12.183	16.9908	23.9625	26.6206	32.2609	40.2841	41.1514	56.673	53.3109	55.8249	63.3745	62.1952	75.4519	64.8552	63.3686	68.3912	2.66672	4.80785	6.97167	2.65813	5.64027	8.02322	0.86728	15.5216	-3.36206	2.51394	7.54965	-1.17929	13.2567	-10.5967	-1.48665	5.02261
afb1-B	7.2489	11.404	15.1541	29.0546	38.0543	51.7562	63.8475	71.9613	76.1192	81.6538	84.5875	84.7451	82.8287	77.9446	80.8698	78.6237	76.747	4.15511	3.75006	13.9005	8.9997	13.7019	12.0913	8.11381	4.15792	5.5346	2.93369	0.15762	-1.91639	-4.88412	2.9252	-2.24614	-1.87666
afb1-B	2.49908	8.59004	16.3895	30.9638	39.8611	52.5081	62.7713	68.4245	74.1671	78.607	81.6049	85.2727	83.4707	89.8333	86.4237	91.7812	93.4911	6.09096	7.7995	14.5742	8.89738	12.6469	10.2632	5.6532	5.74264	4.43985	2.99795	3.66778	-1.80201	6.36259	-3.40961	5.35755	1.70991
afb1-B	-0.10348	3.83479	11.8215	29.0546	39.8611	52.3449	61.9978	74.5042	83.1051	83.9137	88.47	83.9751	84.5979	85.1978	79.2869	82.1684	82.0737	3.93827	7.9867	17.2331	10.8065	12.4837	9.65292	12.5065	8.60086	0.80859	4.55627	-4.49489	0.62286	0.59989	-5.91094	2.88156	-0.0947
afb1-B	2.52895	5.91634	12.5288	29.1975	45.0556	52.3449	74.3997	83.3835	89.9479	92.9852	93.9877	94.8041	91.1472	95.64	94.2364	95.4612	95.0333	3.38739	6.61247	16.6687	15.8581	7.28929	22.0549	8.9838	6.56435	3.03731	1.0025	0.81639	-3.65682	4.49276	-1.40362	1.22476	-0.42781
tir1-B	7.77966	13.1684	24.5901	41.4237	53.1857	63.3484	74.0194	76.2047	78.2228	77.6479	76.4534	71.0535	71.5188	77.3045	75.2032	75.8974	79.5341	5.38875	11.4217	16.8336	11.762	10.1627	10.671	2.1853	2.01809	-0.57483	-1.19449	-5.39997	0.46534	5.78566	-2.10123	0.69413	3.63669
tir1-B	2.44132	3.65795	7.90716	15.4222	28.666	35.0476	45.9028	49.8095	56.0181	63.4001	69.4692	71.8791	76.3833	77.8218	80.2176	82.1684	79.6349	1.21663	4.24921	7.515	13.2439	6.38161	10.8552	3.90666	6.20861	7.38201	6.06915	2.40986	4.50424	1.43847	2.39579	1.95085	-2.5335
tir1-B	4.53198	5.41608	11.113	14.4208	25.4017	39.719	53.2148	55.3732	60.6726	62.1266	71.4671	73.866	74.9354	75.1569	68.4287	71.4987	75.4181	0.8841	5.69696	3.30773	10.981	14.3173	13.4958	2.15836	5.29945	1.45396	9.34053	2.39888	1.06941	0.22149	-6.7282	3.06997	3.91948
tir1-B	25.2427	34.7192	35.3948	48.3665	69.2833	66.888	77.9332	83.7396	88.8566	91.3507	91.0956	92.6659	92.9665	91.1352	86.8779	85.2982	88.2023	9.47651	0.67559	12.9717	20.9169	-2.39536	11.0453	5.80641	5.11702	2.49408	-0.25518	1.57032	0.30068	-1.83132	-4.25736	-1.57972	2.90418
t1345-B	-6.44367	-10.0824	-6.54629	-4.63546	6.39576	16.6127	18.7465	29.7103	37.9668	53.6257	51.0487	58.4048	58.7688	65.0581	59.2159	69.1614	67.0879	-3.6387	3.53608	1.91083	11.0312	10.2169	2.13383	10.9638	8.25647	15.6589	-2.57704	7.35608	0.36402	6.28935	-5.84229	9.94551	-2.07343
t1345-B	20.153	22.0102	26.565	34.5923	43.7825	47.7759	48.5133	57.4155	66.3608	72.5677	78.8985	80.8493	83.7836	85.1474	81.0274	85.17	80.3766	1.85725	4.55482	8.02724	9.19025	3.99332	0.73741	8.90219	8.94538	6.20687	6.33081	1.95076	2.9343	1.3638	-4.12001	4.1426	-4.79338
t1345-B	13.7479	12.6482	18.0343	27.3499	36.0829	43.7901	49.3958	57.6898	67.4048	68.0529	71.0489	63.91	61.214	54.5609	59.0362	63.3686	60.7843	-1.09979	5.38614	9.31559	8.73306	7.70721	5.60565	8.29402	9.71499	0.64807	2.99602	-7.13893	-2.69601	-6.6531	4.47538	4.33232	-2.58425
t1345-B	28.0751	29.2016	30.6186	40.0303	50.25	56.7349	57.5931	69.4094	84.5075	91.6414	95.5196	96.9561	96.0693	98.4858	94.7636	94.9761	88.475	1.12652	1.41698	9.41165	10.2197	6.48494	0.85818	11.8163	15.0981	7.13385	3.87825	1.43642	-0.8868	2.41656	-3.72218	0.21242	-6.50108
1C7-B	3.26298	14.1932	20.7256	32.0054	42.1932	48.7275	50.9685	54.0833	65.271	59.9659	63.337	65.7118	67.2028	72.4153	70.1448	70.6436	71.8347	10.9302	6.53235	11.2798	10.1878	6.53436	2.24099	3.11481	11.1877	-5.30509	3.37109	2.3748	1.49097	5.21253	-2.27052	0.49877	1.19119
1C7-B	-3.23984	-3.01853	4.57392	11.5922	24.6791	30.1699	26.3869	28.4886	29.6928	36.7051	33.9214	37.0564	33.6438	43.6641	35.5377	38.1674	38.9328	0.22131	7.59245	7.01826	13.0869	5.49076	-3.78296	2.10165	1.20417	7.01234	-2.78368	3.13501	-3.41259	10.0203	-8.12646	2.62976	0.76533
1C7-B	7.82345	11.404	25.7693	37.5686	46.5244	50.441	55.3134	60.1064	70.6983	67.9526	77.0978	75.9033	75.3795	74.3092	75.9638	78.8634	73.3789	3.58056	14.3653	11.7993	8.95578	3.91662	4.87237	4.79308	10.5919	-2.74577	9.14522	-1.19447	-0.52378	-1.07037	1.65459	2.89965	-5.48451
1C7-B	-5.60896	-2.64567	5.04245	14.0362	20.432	29.845	36.2062	40.2796	44.9479	41.2418	42.9929	48.0617	48.9447	51.7862	52.0013	62.5837	58.0115	2.96329	7.68812	8.99379	6.39577	9.41295	6.36127	4.07333	4.66831	-3.70608	1.75112	5.06878	0.88298	2.84157	0.21503	10.5825	-4.57227
tir1-C	18.2435	10.6507	12.5431	17.2737	28.3957	36.526	44.8354	56.2675	63.0665	69.1651	51.6666	62.049	67.7493	76.4945	82.1667	81.1509	83.374	-7.59284	1.89244	4.7306	11.122	8.13027	8.30936	11.4322	6.79898	6.09856	-17.4985	10.3825	5.70031	8.74514	5.67222	-1.01578	2.22313
tir1-C	21.0725	27.2	39.0283	53.59	65.9376	72.9011	78.9126	81.4686	79.8234	80.3139	83.8874	86.8202	83.4196	86.3668	86.5654	79.9929	82.7613	6.1274	11.8283	14.5617	12.3476	6.96347	6.01149	2.55609	-1.64523	0.49051	3.57348	2.93276	-3.40053	2.94713	0.19864	-6.57251	2.76838
tir1-C	0.03504	-1.65481	11.2527	19.7313	37.3763	56.617	58.1339	69.675	79.9947	79.9685	83.1913	84.5077	85.9446	87.0807	85.4473	85.283	88.2068	-1.68985	12.9075	8.47858	17.645	19.2407	1.51693	11.5411	10.3196	-0.02617	3.22277	1.31641	1.43688	1.13613	-1.63343	-0.16428	2.92382
tir1-C	3.1291	-0.35286	5.64499	9.75613	17.0028	33.2025	36.3046	52.2108	66.4499	71.4842	76.8615	79.2611	85.494	85.8575	89.9319	83.8257	84.5198	-3.48196	5.99785	4.11114	7.24669	16.1997	3.10207	15.9062	14.2391	5.03425	5.37731	2.39961	6.23292	0.36346	4.07439	-6.10619	0.69413
t1-C	5.22947	1.35695	7.74358	18.6728	29.376	39.8788	49.599	61.2178	69.4586	75.0605	80.7879	83.991	91.8142	95.8205	92.9447	95.8851	98.4604	-3.87252	6.38663	10.9292	10.7032	10.5028	9.72022	11.6188	8.24086	5.60187	5.72741	3.20306	7.82317	4.00633	-2.87583	2.94048	2.57526
t1-C	7.88835	13.0782	13.7751	27.5723	40.9092	52.6571	64.372	73.6215	81.9038	84.9494	90.034	90	95.444	93.934	92.6582	94.0804	88.6125	5.18982	0.69692	13.7972	13.3369	11.7479	11.7149	9.24954	8.28228	3.04556	5.08465	-0.03404	5.44403	-1.51002	-1.27583	1.42222	-5.46787
t1-C	-0.97005	-11.1372	-5.87873	-11.5618	-5.92625	-1.8705	1.26746	8.61013	8.89355	17.5317	36.6071	45	54.767	58.1836	65.9694	71.2467	75.0934	-10.1671	5.25843	-5.68305	5.63553	4.05575	3.13796	7.34267	0.28342	8.63816	19.0754	8.39293	9.76702	3.4166	7.78576	5.27736	3.84663
t1-C	11.4761	13.8972	19.9637	25.7225	32.6353	44.8919	49.3731	53.0877	60.9533	65.144	66.6785	62.8189	68.6817	76.5506	72.3394	79.1902	79.0293	2.42109	6.06654	5.75883	6.91278	12.2566	4.48124	3.71456	7.86557	4.19073	1.53449	-3.85959	5.86285	7.86886	-4.21115	6.85076	-0.16088
1C7-C	16.8177	29.225	41.3724	53.5549	61.5993	70.6018	74.9039	73.7374	74.1402	74.4405	77.5052	78.4399	82.3643	80.9036	83.7852	79.274	83.0817	12.4073	12.1474	12.1825	8.04439	9.00251	4.3021	-1.16654	0.40277	0.30032	3.06474	0.93464	3.92444	-1.46069	2.88162	-4.51126	3.80775
1C7-C	52.3408	59.7482	71.7347	78.9638	81.5744	85.2564	88.2442	87.7118	88.8192	87.4296	86.4577	90	91.9478	93.8883	93.7459	89.6817	88.4689	7.40744	11.9864	7.22916	2.61059	3.68199	2.98779	-0.53237	1.10736	-1.38963	-0.97187	3.54229	1.94778	1.94051	-0.14235	-4.06425	-1.21281
1C7-C	-9.57016	-3.59256	8.20999	21.2496	32.6353	46.0152	42.9877	54.4199	50.1153	63.8895	69.478	59.0362	61.0749	69.96	66.1498	73.9731	71.2793	5.9776	11.8026	13.0396	11.3857	13.3799	-3.02744	11.4322	-4.30456	13.7742	5.58845	-10.4418	2.03864	8.88511	-3.81015	7.82321	-2.69376
1C7-C	-3.68025	2.54572	12.2677	24.0527	32.5193	34.3309	35.5892	39.3269	51.6308	47.9319	54.4964	62.0205	70.2743	73.5536	71.7538	69.1256	77.7381	6.22597	9.72194	11.785	8.46663	1.81155	1.25837	3.73766	12.3038	-3.69884	6.56444	7.52417	8.25374	3.27929	-1.79971	-2.62821	8.61247
1C5-C	4.30293	6.77216	12.8729	41.3817	47.0212	59.993	69.4255	70.2353	75.1774	72.8986	72.0649	70.56	76.559	75.1166	74.2896	78.7962	78.4043	2.46923	6.10071	28.5088	5.6395	12.9718	9.43249	0.80983	4.94205	-2.27876	-0.8337	-1.50493	5.99908	-1.44243	-0.827	4.50654	-0.39185
1C5-C	4.49064	5.55328	16.2432	34.4433	40.9092	55.1967	60.4079	65.653	72.1762	74.664	76.7935	75.9638	80.0489	78.6332	76.9373	73.3678	70.3552	1.06264	10.6899	18.2001	6.46588	14.2876	5.21116	5.24514	6.52321	2.48776	2.12951	-0.82976	4.08512	-1.41571	-1.69592	-3.56941	-3.01259
1C5-C	0.03504	4.41078	20.2949	34.4433	50.6107	59.2412	72.7326	71.5226	74.8198	75.3449	77.5052	77.9885	80.6672	78.989	81.6347	88.6939	89.7142	4.37574	15.8841	14.1484	16.1674	8.63054	13.4914	-1.20999	3.29718	0.52509	2.16032	0.48329	2.67864	-1.67812	2.64569	7.0592	1.02031
1C5-C	25.0519	24.7307	32.9174	41.2446	62.5502	71.0387	82.2407	85.9667	90.8161	91.8283	86.6676	87.6627	85.9698	79.3234	79.8513	82.0871	88.6533	-0.3212	8.18663	8.32726	21.3056	8.48852	11.202	3.72596	4.84941	1.01219	-5.1607	0.99511	-1.69285	-6.6464	0.52783	2.23578	6.56628
Col-C	12.9425	25.3571	36.2677	50.8636	65.7546	71.4569	74.3113	77.9461	82.6152	79.7152	85.3481	87.4552	92.8997	94.5786	97.4557	96.1648	95.3136	12.4146	10.9106	14.5959	14.8909	5.70239	2.85431	3.63486	4.66905	-2.9	5.63298	2.10706	5.4445	1.67886	2.87713	-1.29093	-0.85118
Col-C	3.46867	11.2808	11.4282	29.8167	34.7246	42.0295	53.3065	58.9938	60.5137	61.7775	62.6842	59.5345	57.4686	63.3781	54.7143	52.8118	59.0636	7.8121	0.14745	18.3885	4.90785	7.3049	11.277	5.68733	1.5199	1.2638	0.90663	-3.1497	-2.06589	5.90948	-8.66377	-1.90249	6.25178
Col-C	6.1075	11.9119	20.2949	37.6231	48.7142	56.9866	62.0768	69.675	80.261	81.9144	84.8396	86.8202	91.1346	93.4466	96.1577	103.006	98.5346	5.80441	8.38299	17.3282	11.091	8.27249	5.09017	7.59821	10.586	1.65337	2.92521	1.98056	4.3144	2.31206	2.71107	6.84852	-4.4716
Col-C	1.1808	11.2808	11.8336	29.7298	38.5599	41.5254	55.7894	56.2675	61.3105	63.3541	69.3386	69.7751	68.9682	79.9351	84.576	81.7121	80.7993	10.1	0.55284	17.8962	8.83011	2.96553	14.264	0.4781	5.04294	2.04362	5.98451	0.43655	-0.80692	10.9669	4.64092	-2.86396	-0.91277
afb1-C	7.62968	16.5055	21.8483	38.408	55.6132	60.6005	78.7062	83.3756	93.1007	97.0442	101.802	107.354	109.187	107.046	104.95	113.52	113.677	8.87586	5.34276	16.5597	17.2052	4.98732	18.1056	4.66948	9.7251	3.9434	4.75818	5.55169	1.83316	-2.14135	-2.0956	8.5702	0.1563
afb1-C	14.6093	21.4486	30.4386	44.7482	54.7659	69.9881	80.1466	79.1733	86.3446	91.8941	90.034	91.1935	91.1904	88.511	91.1254	91.3664	94.3497	6.83929	8.99002	14.3096	10.0177	15.2222	10.1584	-0.97328	7.1713	5.54947	-1.86002	1.15945	-0.0031	-2.67939	2.61436	0.24101	2.98333
afb1-C	8.94997	16.1515	26.3039	41.8857	57.2809	61.8194	66.8099	75.1608	82.1873	82.6134	83.6938	86.3478	83.9036	86.9303	83.0891	85.0462	82.2828	7.20153	10.1524	15.5818	15.3951	4.53855	4.99047	8.35096	7.02649	0.42605	1.08048	2.65393	-2.44413	3.02666	-3.84121	1.95713	-2.7634
afb1-C	8.46201	12.9959	20.7764	33.023	43.5029	54.6743	62.6543	70.2496	77.3123	80.4568	85.2704	85.6013	87.2671	84.3438	87.3871	83.9711	83.7052	4.53386	7.78049	12.2467	10.4799	11.1714	7.97995	7.59536	7.0627	3.1445	4.81359	0.33089	1.66578	-2.92331	3.04331	-3.41597	-0.26587
t345-C	9.72383	8.95708	18.9515	36.865	41.086	51.6581	57.9273	64.4942	68.4441	70.1723	76.9421	78.6901	85.9241	84.3438	86.9962	91.3664	96.4241	-0.76675	9.99444	17.9135	4.22101	10.572	6.26919	6.56699	3.94989	1.72816	6.76986	1.74792	7.23405	-1.58036	2.65244	4.37017	5.05771
t345-C	9.35863	7.24178	20.4644	43.4159	47.9129	61.9124	64.372	68.3863	73.4805	76.4705	75.9978	76.5043	79.0164	84.7487	81.2793	83.8257	87.1694	-2.11685	13.2226	22.9515	4.49695	13.9995	2.45959	4.01427	5.09426	2.98997	-0.47271	0.50647	2.51217	5.73223	-3.46934	2.54635	3.34376
t345-C	22.5556	27.1591	41.559	53.8384	63.335	65.0282	78.8318	75.4873	78.7471	81.0042	79.4144	82.875	82.2463	85.2762	84.0545	86.8193	85.8137	4.60353	14.3999	12.2794	9.49661	1.69315	13.8036	-3.34452	3.25978	2.25712	-1.58982	3.4606	-0.62864	3.0299	-1.22176	2.7648	-1.00553
t345-C	6.15054	4.90954	15.3811	21.5496	25.5411	33.1236	42.2328	42.9362	54.8615	60.6278	64.1677	65.8209	66.167	63.3781	65.3083	66.9307	67.703	-1.241	10.4716	6.16846	3.99154	7.5825	9.1092	0.70343	11.9253	5.76628	3.53991	1.65321	0.3461	-2.78894	1.93026	1.6224	0.77225
t1345-C	7.46645	14.268	22.7902	31.4496	48.4764	53.022	63.2703	64.3976	68.5503	71.8848	76.2733	79.177	83.5475	84.5538	83.222	78.0481	80.4681	6.80156	8.52214	8.65943	17.0268	4.54557	10.2483	1.12731	4.15268	3.33454	4.38841	2.90374	4.37055	1.00625	-1.33176	-5.17397	2.42007
t1345-C	5.84177	6.19343	9.86352	17.4928	27.1997	33.9378	49.4708	43.4094	49.82	45.8583	48.0468	45.9392	53.8026	60.5853	65.255	70.145	77.8928	0.35166	3.67009	7.6293	9.70684	6.73817	15.533	-6.06139	6.41058	-3.96169	2.18851	-2.10764	7.86346	6.7827	4.66966	4.89003	7.74771
t1345-C	8.27066	11.6586	10.1988	15.0033	22.2063	35.2543	49.8778	48.4611	64.8373	69.1123	75.3577	80.7539	86.1386	92.7358	97.2069	98.2125	102.589	3.38796	-1.45986	4.80451	7.20303	13.048	14.6235	-1.41669	16.3762	4.27501	6.24531	5.39624	5.38468	6.59723	4.47107	1.00559	4.37678
t1345-C	10.8581	12.739	12.5745	9.75613	20.8246	28.1092	36.4695	45.9627	53.4901	60.3413	64.6263	69.6769	74.1841	79.4516	86.9962	87.7725	92.2038	1.88098	-0.16457	-2.81833	11.0685	7.28466	8.36022	9.49321	7.52738	6.85123	4.28503	5.05054	4.50722	5.26754	7.54458	0.77634	4.43125
afb1-D	-15.5421	-18.6992	-15.9009	-4.97126	0.90669	15.898	30.4111	38.3172	55.584	60.7923	69.725	74.1695	78.8206	82.2767	87.3834	87.8583	90	-3.1571	2.79836	10.9296	5.87795	14.9913	14.5131	7.9061	17.2668	5.20833	8.93271	4.44445	4.65108	3.45615	5.10666	0.4749	2.14174
afb1-D	8.62792	10.1732	15.404	31.8913	47.4475	59.6111	65.2249	75.764	81.8815	86.2706	87.9111	87.2872	86.5161	91.556	89.82	90.6006	88.9584	1.54528	5.23079	16.4873	15.5562	12.1635	5.61378	10.5391	6.11752	4.38905	1.64052	-0.62388	-0.77111	5.03991	-1.73601	0.7806	-1.64224
afb1-D	-0.28701	-0.26428	4.84962	12.42	24.4285	35.4913	45.8814	57.648	67.4907	75.2727	79.6447	80.2226	83.9407	82.2767	83.8731	85.9852	85.1009	0.02273	5.1139	7.57034	12.0086	11.0627	10.3901	11.7666	9.84277	7.78197	4.37205	0.5779	3.71809	-1.66403	1.59645	2.11202	-0.88426
afb1-D	3.28932	12.54	20.3127	35.8538	50.1608	64.5835	72.646	85.4015	89.0751	92.5732	94.0052	93.13	93.1296	89.8713	86.7259	90.6157	86.9059	9.25067	7.77272	15.5411	14.307	14.4227	8.0625	12.7556	3.6736	3.49808	1.43195	-0.87512	-0.00048	-3.25823	-3.14539	3.8898	-3.70981
tir1-D	3.23444	2.17237	12.9492	28.5822	33.495	44.7846	45.971	56.4117	62.7212	66.5292	73.121	75.5294	77.1455	78.3367	82.5668	85.0659	83.6598	-1.06207	10.7768	15.633	4.91287	11.2895	1.18642	10.4407	6.30944	3.80802	6.59181	2.40844	1.61602	1.19125	4.2301	2.49909	-1.4061
tir1-D	7.09903	12.4161	20.3127	35.4023	49.649	64.2246	68.587	74.339	78.357	81.9397	84.2481	84.0441	83.6095	81.9017	78.0949	80.6371	85.6013	5.31707	7.89661	15.0896	14.2467	14.5756	4.3624	5.752	4.018	3.58272	2.3083	-0.20397	-0.43453	-1.70782	-3.80683	2.54218	4.96421
tir1-D	14.4103	29.8771	37.3561	48.5097	63.2399	70.1308	83.3675	87.4787	89.8709	93.4232	97.0572	93.8954	91.7974	93.6027	89.82	92.0625	90	15.4668	7.47895	11.1536	14.7303	6.89085	13.2367	4.11123	2.39214	3.55238	3.63393	-3.16176	-2.09806	1.80539	-3.78273	2.24249	-2.0625
tir1-D	6.83801	13.472	23.9554	39.5012	49.8181	61.1741	65.7722	78.3307	79.3098	83.9408	84.2481	83.8778	85.8641	87.3265	84.267	86.9502	84.9869	6.63398	10.4834	15.5458	10.3169	11.356	4.59811	12.5585	0.97913	4.63092	0.30728	-0.37029	1.98636	1.46242	-3.0595	2.68321	-1.96336
t1345-D	12.8855	17.6402	30.4591	33.715	48.9496	56.0945	63.8861	76.6662	83.3511	86.7528	92.066	92.6132	91.1686	89.8713	85.8058	83.6675	85.2364	4.75463	12.8189	3.25584	15.2347	7.14493	7.79156	12.7801	6.68483	3.40179	5.31314	0.54723	-1.4446	-1.29728	-4.06551	-2.13828	1.56881
t1345-D	8.9591	14.3566	23.0785	29.4405	43.4078	49.3224	53.1301	58.2655	60.8163	59.9879	63.7248	65.0865	70.1509	72.1709	72.2276	69.394	70.56	5.39749	8.72188	6.36201	13.9673	5.91457	3.80773	5.13536	2.5508	-0.82837	3.73694	1.36169	5.06434	2.02005	0.05668	-2.83359	1.16597
t1345-D	7.84309	1.16782	7.0049	12.4531	20.8425	29.5295	36.8699	39.7578	47.8837	50.7029	51.1604	59.4205	60.0508	58.6864	63.255	63.1115	56.8887	-6.67527	5.83708	5.44823	8.38936	8.68699	7.34042	2.8879	8.12585	2.81927	0.45752	8.26007	0.63033	-1.36447	4.56859	-0.14345	-6.22285
t1345-D	-5.83998	-4.93114	-1.60799	9.38439	23.2337	30.7484	34.3302	32.2126	44.8709	49.6677	56.4317	56.2602	60.2049	58.9076	61.2096	61.8525	67.0113	0.90884	3.32315	10.9924	13.8493	7.51469	3.58186	-2.11766	12.6583	4.79682	6.76406	-0.17159	3.94471	-1.29728	2.30197	0.64291	5.15882
1C7-D	25.1207	27.2885	44.0729	59.7967	63.2399	66.586	72.4744	63.2352	67.251	72.1022	65.6411	61.6495	72.4242	72.2789	77.4809	70.3865	74.7449	2.16782	16.7844	15.7238	3.44323	3.34608	5.88842	-9.23923	4.0158	4.85124	-6.4611	-3.99168	10.7747	-0.14525	5.202	-7.09441	4.35837
1C7-D	14.0133	25.6021	30.4591	49.89	56.8997	60.0397	62.0205	65.3563	67.8346	66.9148	71.7368	72.5962	75.2062	79.031	84.1094	79.8941	81.2538	11.5888	4.85703	19.4309	7.00971	3.13998	1.98081	3.33577	2.47833	-0.91982	4.82199	0.8594	2.60998	3.82485	5.07839	-4.21527	1.35969
1C7-D	6.42283	14.6671	24.8238	38.0631	49.7747	58.5662	59.6209	64.8563	64.9269	63.2819	64.8034	57.9448	65.8475	65.6436	74.696	78.673	77.7995	8.24431	10.1566	13.2393	11.7116	8.79148	1.05467	5.23547	0.07061	-1.64509	1.5215	-6.85852	7.90267	-0.20392	9.05241	3.97702	-0.87349
1C7-D	5.569	15.112	25.5898	37.7426	52.0582	49.021	62.5924	69.4771	69.7756	60.4194	58.8565	59.2505	72.2493	68.9468	75.7838	77.2691	75.0686	9.54297	10.4779	12.1528	14.3155	-3.03718	13.5714	6.88469	0.29852	-9.35618	-1.56296	0.39401	12.9988	-3.30247	6.83693	1.48537	-2.20056
t1-D	1.30413	6.07591	13.9161	21.1086	30.7687	41.7718	52.8831	64.9366	74.1197	75.5658	79.3828	77.9741	82.8247	80.409	77.9985	76.8016	77.4712	4.77178	7.84021	7.19245	9.66017	11.0031	11.1113	12.0534	9.18314	1.44612	3.81696	-1.40868	4.85063	-2.4157	-2.4105	-1.19696	0.66963
t1-D	-4.99486	-4.8382	-7.35704	-5.83194	1.39612	7.9147	18.435	37.4945	50.0653	56.572	67.7108	78.6403	80.4874	87.0786	91.9026	92.6893	102.2	0.15666	-2.51884	1.5251	7.22806	6.51858	10.5203	19.0595	12.5708	6.50673	11.1388	10.9295	1.84713	6.59122	4.82394	0.78677	9.51112
t1-D	-8.81778	-7.65032	-5.71946	9.70358	24.7097	42.8097	60.6422	70.9142	75.3364	79.2272	79.6163	81.5843	88.214	87.9622	89.82	92.8564	95.5722	1.16746	1.93086	15.423	15.0062	18.0999	17.8326	10.2719	4.42224	3.89085	0.38903	1.96805	6.62971	-0.25185	1.85782	3.03638	2.71581
t1-D	-8.98251	-11.4072	-16.8827	-6.746	-1.62712	6.26767	17.5256	23.7627	30.0444	38.3271	44.0564	55.7345	65.6452	67.705	74.696	79.1851	77.9052	-2.42466	-5.4755	10.1367	5.11888	7.89479	11.2579	6.23717	6.28164	8.28273	5.72924	11.6782	9.91067	2.0598	6.99101	4.48908	-1.27984
Col-D	-2.81313	1.85682	3.91759	15.7864	21.6064	38.9583	46.0416	55.0443	59.972	68.6529	76.5217	77.4214	79.4106	78.5614	77.3941	80.8347	76.5514	4.66995	2.06077	11.8688	5.81997	17.3519	7.08337	9.00271	4.92762	8.68089	7.86883	0.89973	1.98915	-0.84915	-1.16734	3.44068	-4.28337
Col-D	-12.4875	-5.19139	2.79072	15.641	34.5001	48.4368	62.3005	72.4462	80.211	85.161	87.9726	89.9502	88.5858	91.2685	89.82	89.6766	84.6855	7.29609	7.98211	12.8503	18.8591	13.9367	13.8637	10.1457	7.76474	4.95004	2.81163	1.97758	-1.36441	2.68271	-1.44851	-0.14345	-4.99111
Col-D	-2.16489	3.25717	14.875	27.8742	41.6251	51.1248	61.1134	65.7248	71.071	77.1473	82.5452	86.5838	86.2975	84.8582	81.6899	82.2451	81.8699	5.42206	11.6178	12.9992	13.751	9.49964	9.98863	4.61133	5.34622	6.07636	5.39792	4.03851	-0.28624	-1.43929	-3.16832	0.55524	-0.37525
Col-D	-1.41031	5.9059	15.8253	30.3953	30.7687	47.0752	54.6375	64.3925	62.9313	68.2321	66.3612	66.3208	70.7707	81.2877	79.2004	76.1808	78.4078	7.31621	9.91938	14.57	0.37342	16.3065	7.56233	9.75499	-1.4612	5.3008	-1.8709	-0.04039	4.44989	10.517	-2.08737	-3.01952	2.22699
1C5-D	7.84309	9.93969	17.9633	33.3857	39.6106	48.1511	58.7816	64.9366	69.9671	71.1056	71.6422	73.1288	78.1815	81.3406	79.9542	82.1807	85.2364	2.0966	8.02364	15.4223	6.22488	8.54051	10.6305	6.15495	5.03056	1.13846	0.53666	1.48658	5.05264	3.15912	-1.38637	2.2265	3.05566
1C5-D	2.39677	10.1434	18.733	33.8553	42.3154	48.7755	47.9108	52.7074	53.1811	54.7732	59.6789	65.7225	66.9243	72.9438	70.9953	75.9158	66.5713	7.74666	8.58961	15.1222	8.46014	6.46008	-0.86467	4.79657	0.47373	1.59202	4.9057	6.04361	1.20178	6.01958	-1.94853	4.92047	-9.34446
1C5-D	4.54341	11.4251	21.0739	43.4767	65.6594	76.2889	80.1342	87.7907	88.0429	88.3194	92.5905	92.6132	88.4423	87.7502	87.6174	87.6311	83.9275	6.88168	9.64885	22.4028	22.1827	10.6294	3.84532	7.65651	0.25219	0.27649	4.27109	0.02275	-4.17092	-0.69206	-0.13283	0.01374	-3.70361
1C5-D	1.47538	14.4121	17.3546	27.1032	32.9835	30.7484	37.5686	38.8358	41.7487	43.628	52.9504	51.7164	72.3573	72.5173	67.4399	78.0429	72.8973	12.9367	2.94254	9.74853	5.88031	-2.23513	6.82023	1.26717	2.91297	1.8793	9.32232	-1.23396	20.6409	0.16	-5.07745	10.6031	-5.14566
t345-D	21.1607	20.6602	27.3543	35.8538	42.9574	44.7846	43.9191	46.2946	49.9133	56.1568	49.219	54.1963	53.0798	56.5607	61.9959	60.622	52.6506	-0.50051	6.69409	8.49948	7.10358	1.82723	-0.86552	2.3755	3.61873	6.24353	-6.93788	4.97737	-1.11649	3.48087	5.4352	-1.37395	-7.97131
t345-D	17.8511	24.5109	30.5796	39.7259	51.3869	55.0894	60.1011	68.2988	68.5002	74.5918	75.0767	78.9962	83.8342	85.2974	88.1834	85.5909	85.486	6.65979	6.06874	9.14626	11.6611	3.70253	5.01165	8.19772	0.20142	6.09155	0.4849	3.91947	4.83808	1.46318	2.88601	-2.59249	-0.10493
t345-D	17.7172	21.9847	32.0322	47.558	63.2399	69.2285	74.876	77.5355	78.5609	83.1371	82.005	78.6403	79.7742	81.1252	83.811	84.3207	82.6942	4.26759	10.0474	15.5258	15.6819	5.98862	5.64744	2.65949	1.02545	4.57614	-1.13211	-3.36467	1.13394	1.35095	2.68582	0.50973	-1.62649
t345-D	10.3326	13.772	27.2875	40.0601	48.1714	60.2458	64.9831	74.0195	77.1905	77.1225	79.6163	75.5294	77.855	75.4506	78.7791	77.2958	79.992	3.43931	13.5155	12.7727	8.1113	12.0744	4.73729	9.03639	3.17098	-0.06793	2.49373	-4.08683	2.32553	-2.40441	3.3285	-1.48327	2.69622
Change in Corrected angles
Col-A	0	-5.46468	9.31913	21.9194	45.4633	57.068	64.6212	67.6501	72.206	72.2276	71.1678	73.2254	71.2437	70.1802	71.1043	67.484	68.8137
Col-A	0	0.2818	5.55222	19.0514	36.1284	33.2124	45.7913	55.4641	64.2347	70.4472	72.6319	78.2124	81.7515	81.3395	84.951	82.7894	85.0215
Col-A	0	0.88633	11.4748	22.0674	35.2014	48.5939	57.0028	66.1276	68.8915	72.2318	69.6453	71.942	75.7054	76.6979	78.2923	76.2834	74.3454
Col-A	0	16.9495	24.1529	34.8282	54.6438	57.5508	66.3482	76.4464	86.7247	88.8114	92.2695	96.9415	96.9134	101.239	99.3549	102.364	102.436
afb1-A	0	6.9804	11.814	26.9015	40.2421	51.2445	62.7361	70.3285	73.0028	80.8932	81.9339	84.073	85.6812	86.4589	87.3749	90.1404	89.5133
afb1-A	0	1.28912	9.95451	17.2443	30.4766	38.8352	47.0932	52.4187	60.3715	63.2294	63.3533	67.183	62.1249	61.3258	58.9376	57.8872	54.2314
afb1-A	0	-0.61555	5.59349	12.5465	22.6303	29.5394	38.1953	47.5192	54.9871	59.3636	60.0423	62.8666	64.3293	66.5875	65.9456	68.37	74.578
afb1-A	0	3.72142	2.95057	13.056	25.7364	44.06	57.143	67.0264	81.5869	89.929	96.566	101.62	104.772	98.0863	93.7214	82.4346	89.1333
t345-A	0	5.26307	14.7642	18.0051	30.7707	36.234	36.7135	48.2912	51.0366	65.7314	65.5994	67.1173	64.8292	71.8315	74.6273	73.31	73.2665
t345-A	0	2.66738	2.93003	9.98498	16.3749	22.9923	37.4346	43.8802	47.9004	51.1709	60.6968	68.0293	59.1256	68.821	65.5202	68.4723	68.821
t345-A	0	4.86948	12.2877	17.4903	28.9368	29.3617	32.4599	40.4554	39.1375	43.36	43.0773	38.6151	41.244	40.2674	43.7255	42.4698	43.4796
t345-A	0	1.7552	11.1323	21.236	18.8437	22.7146	29.1051	32.2474	31.9439	44.0672	46.4431	48.0657	49.3962	54.4513	58.85	63.427	61.9863
t1345-A	0	5.2482	10.8897	24.6135	42.2771	46.6555	56.1178	60.479	62.7503	68.8422	65.9638	69.7891	66.785	64.1153	58.3635	60.5845	52.4433
t1345-A	0	-2.55999	-5.14406	1.40612	8.01894	12.2489	19.3914	21.6606	23.3791	24.6885	31.8256	30.804	36.1378	40.3971	39.4666	39.9564	35.9984
t1345-A	0	6.1079	13.1431	19.8482	30.0704	31.4676	39.9362	46.4224	44.1066	48.5053	47.0615	38.2005	41.0501	41.6626	40.5079	39.3461	35.2648
t1345-A	0	6.22196	7.26843	18.249	23.1928	27.79	30.1954	38.8075	38.0034	49.2629	59.0221	62.9674	68.1521	70.8861	68.8552	68.8848	58.8409
tir1-A	0	-5.89734	-2.7186	-1.21676	4.13436	14.9474	30.0704	37.46	42.266	47.2196	55.8329	51.4753	57.4492	58.7106	59.3993	60.2665	64.9121
tir1-A	0	8.29265	13.0805	26.5445	35.435	46.0546	54.1261	60.7034	61.1253	67.8907	63.6117	72.1051	73.5805	79.6844	84.0805	90.7158	88.5651
tir1-A	0	-0.42798	11.3293	28.1567	35.1097	49.7306	60.1266	60.2169	67.0404	71.5789	74.1642	80.1097	78.658	77.0156	77.3834	76.0446	72.2025
tir1-A	0	0.34171	6.98314	13.9521	28.0412	38.653	50.4213	64.2448	82.1808	84.3804	87.8902	95.4213	101.676	102.546	103.117	109.271	107.622
t1-A	0	-3.01231	3.41525	4.31224	16.0758	23.7842	40.1354	52.3968	60.3345	72.5017	75.6864	83.3417	88.2543	90.6045	92.0693	96.1216	90.4737
t1-A	0	4.6453	13.5977	23.2114	32.1354	42.3366	52.4904	60.7251	66.776	71.1284	71.6777	77.2756	72.9509	72.6785	69.6555	72.8149	69.7937
t1-A	0	5.70688	10.0487	12.5416	21.8995	40.4388	44.929	54.1376	63.1477	72.6101	79.1024	87.0804	91.371	100.539	104.615	107.961	102.989
t1-A	0	7.92799	12.726	25.2841	34.7068	54.5694	65.9845	74.6799	80.2779	89.1692	94.8876	97.1767	98.7816	92.6198	90.3766	85.2593	81.8544
1C7-A	0	8.14178	13.4412	29.7371	34.7068	40.0961	47.5545	53.6949	53.9375	58.6693	59.4878	57.7772	60.4872	62.1144	60.5278	57.7188	57.9054
1C7-A	0	5.37765	13.2389	21.1484	35.2385	44.4308	47.636	50.0108	50.0484	58.0405	61.4219	57.2055	61.4977	64.9571	63.8024	63.5185	64.6102
1C7-A	0	7.54371	16.2882	32.2869	42.8652	47.9684	52.7981	52.7152	50.0086	50.3183	54.7201	52.054	52.9375	53.6022	49.4216	58.8593	49.8083
1C7-A	0	14.9775	19.0344	33.9719	44.3917	52.5591	60.2216	67.2615	64.9743	68.8299	69.7133	71.0615	74.9795	80.3655	76.1708	77.3164	79.2655
1C5-A	0	7.31081	23.3029	33.5109	56.7095	63.2915	69.8259	74.1975	77.0205	78.4101	86.2991	88.2017	92.1601	90.0836	83.2746	84.6361	79.6223
1C5-A	0	9.38385	20.6509	36.3812	54.8678	69.918	70.5001	77.5061	80.0858	83.5764	86.6753	84.8494	84.9888	81.7273	78.0066	78.4593	71.0678
1C5-A	0	4.29848	15.959	35.7405	41.6453	52.9048	47.5791	49.5744	43.2013	50.6664	49.0536	52.0834	58.5465	68.4235	60.3446	65.1854	68.6349
1C5-A	0	-1.70758	5.77337	21.9969	40.3551	58.6003	66.0425	76.7008	70.221	77.5216	78.8795	84.2184	85.8835	89.929	93.5053	95.7514	97.5236
t1-B	0	5.18884	12.47	19.2456	36.6711	42.452	58.0264	64.9163	69.394	72.3149	75.807	75.8445	75.8587	74.6149	70.7105	71.1526	68.3124
t1-B	0	6.36067	6.6458	14.2128	23.4369	35.9468	46.6516	54.6621	63.6383	63.6685	71.1245	76.8025	77.6593	84.6937	86.2076	95.2315	101.98
t1-B	0	-1.93052	9.22914	12.6464	22.4267	26.3176	34.6816	43.1911	44.0829	47.7121	54.4376	61.6001	68.0841	69.2809	72.4744	66.0913	68.1793
t1-B	0	-5.04114	-4.50863	0.77141	9.93725	23.4177	38.2372	46.2805	60.8837	64.641	69.5243	74.7879	80.4736	85.6495	84.6854	86.0024	89.5424
Col-B	0	-6.49424	5.81407	9.39679	22.5392	35.1511	39.8457	54.6741	69.3258	74.9196	77.7408	86.7726	86.1121	85.1731	86.2894	85.5525	81.3588
Col-B	0	-1.02259	6.13042	12.6597	22.3471	32.8532	40.2508	54.7346	66.7646	65.1647	68.7802	70.8173	73.8955	74.7692	71.0242	71.9834	71.5659
Col-B	0	-2.69496	12.2939	14.2931	31.7464	50.7782	61.1845	69.3843	78.9979	76.9132	85.1125	86.964	85.8635	87.2439	85.5767	81.1402	78.5688
Col-B	0	0.23746	5.89628	16.4105	28.7438	38.9211	43.89	51.1792	56.3613	60.4624	65.2881	64.4162	62.5115	67.6702	73.2888	72.1478	74.9079
1C5-B	0	-0.85187	9.15137	19.6683	27.6647	45.2062	47.9979	57.4539	66.2748	68.498	72.8819	75.187	77.653	76.7465	76.9663	74.2595	74.9497
1C5-B	0	-2.32103	10.4917	27.1589	36.9607	55.0815	63.4789	69.7301	74.7697	74.933	76.3794	79.1378	76.4045	81.0968	76.1006	77.9062	81.001
1C5-B	0	3.88812	11.9541	33.6184	48.0947	56.9252	68.5199	75.3545	79.853	82.3919	83.015	84.9894	82.6881	83.7822	79.3322	80.7723	84.748
1C5-B	0	10.2097	20.2622	35.0642	46.1123	57.9664	64.156	70.5674	70.9663	71.0774	69.9745	69.3752	72.2027	72.549	66.7175	69.0344	75.3807
t345-B	0	8.587	16.35	24.5572	35.8784	39.6203	46.5003	52.0005	56.1805	64.5347	67.6814	69.6033	67.683	70.4305	67.1182	67.9048	74.667
t345-B	0	2.48814	17.3097	22.2763	24.3368	36.6496	46.3963	45.9994	56.2399	58.0763	57.4827	57.9643	61.0751	64.9275	60.9942	65.0674	69.7749
t345-B	0	0.83991	11.2192	16.3058	19.2767	31.5488	42.2416	39.4743	44.7209	51.888	60.2005	65.7445	62.671	74.1611	71.639	74.4783	77.7963
t345-B	0	2.66672	7.47457	14.4462	17.1044	22.7446	30.7679	31.6351	47.1567	43.7947	46.3086	53.8583	52.679	65.9356	55.339	53.8523	58.8749
afb1-B	0	4.15511	7.90517	21.8057	30.8054	44.5073	56.5986	64.7124	68.8703	74.4049	77.3386	77.4962	75.5798	70.6957	73.6209	71.3748	69.4981
afb1-B	0	6.09096	13.8905	28.4647	37.3621	50.009	60.2722	65.9254	71.668	76.1079	79.1058	82.7736	80.9716	87.3342	83.9246	89.2821	90.992
afb1-B	0	3.93827	11.925	29.1581	39.9646	52.4483	62.1013	74.6077	83.2086	84.0172	88.5734	84.0786	84.7014	85.3013	79.3904	82.2719	82.1772
afb1-B	0	3.38739	9.99986	26.6685	42.5266	49.8159	71.8708	80.8546	87.4189	90.4562	91.4587	92.2751	88.6183	93.1111	91.7074	92.9322	92.5044
tir1-B	0	5.38875	16.8105	33.644	45.406	55.5687	66.2397	68.425	70.4431	69.8683	68.6738	63.2738	63.7392	69.5248	67.4236	68.1177	71.7544
tir1-B	0	1.21663	5.46584	12.9808	26.2247	32.6063	43.4615	47.3681	53.5768	60.9588	67.0279	69.4378	73.942	75.3805	77.7763	79.7271	77.1936
tir1-B	0	0.8841	6.58106	9.88879	20.8698	35.187	48.6828	50.8412	56.1406	57.5946	66.9351	69.334	70.4034	70.6249	63.8967	66.9667	70.8862
tir1-B	0	9.47651	10.1521	23.1238	44.0406	41.6453	52.6905	58.4969	63.6139	66.108	65.8529	67.4232	67.7238	65.8925	61.6352	60.0555	62.9596
t1345-B	0	-3.6387	-0.10262	1.80821	12.8394	23.0564	25.1902	36.154	44.4105	60.0694	57.4924	64.8484	65.2125	71.5018	65.6595	75.605	73.5316
t1345-B	0	1.85725	6.41207	14.4393	23.6296	27.6229	28.3603	37.2625	46.2079	52.4147	58.7455	60.6963	63.6306	64.9944	60.8744	65.017	60.2236
t1345-B	0	-1.09979	4.28635	13.6019	22.335	30.0422	35.6479	43.9419	53.6569	54.3049	57.301	50.162	47.466	40.8129	45.2883	49.6206	47.0364
t1345-B	0	1.12652	2.5435	11.9551	22.1749	28.6598	29.518	41.3343	56.4324	63.5663	67.4445	68.8809	67.9942	70.4107	66.6885	66.901	60.3999
1C7-B	0	10.9302	17.4626	28.7424	38.9302	45.4645	47.7055	50.8203	62.008	56.7029	60.074	62.4488	63.9398	69.1523	66.8818	67.3806	68.5718
1C7-B	0	0.22131	7.81376	14.832	27.919	33.4097	29.6268	31.7284	32.9326	39.9449	37.1613	40.2963	36.8837	46.904	38.7775	41.4073	42.1726
1C7-B	0	3.58056	17.9459	29.7451	38.7009	42.6175	47.4899	52.283	62.8749	60.1291	69.2743	68.0799	67.5561	66.4857	68.1403	71.04	65.5555
1C7-B	0	2.96329	10.6514	19.6452	26.041	35.4539	41.8152	45.8885	50.5568	46.8508	48.6019	53.6707	54.5536	57.3952	57.6102	68.1927	63.6204
tir1-C	0	-7.59284	-5.7004	-0.9698	10.1522	18.2825	26.5918	38.024	44.823	50.9215	33.423	43.8055	49.5058	58.251	63.9232	62.9074	65.1305
tir1-C	0	6.1274	17.9557	32.5174	44.8651	51.8285	57.84	60.3961	58.7509	59.2414	62.8149	65.7476	62.3471	65.2942	65.4929	58.9204	61.6887
tir1-C	0	-1.68985	11.2176	19.6962	37.3412	56.582	58.0989	69.64	79.9596	79.9335	83.1562	84.4726	85.9095	87.0457	85.4122	85.2479	88.1718
tir1-C	0	-3.48196	2.51589	6.62703	13.8737	30.0734	33.1755	49.0817	63.3208	68.3551	73.7324	76.132	82.3649	82.7284	86.8028	80.6966	81.3907
t1-C	0	-3.87252	2.51411	13.4433	24.1465	34.6493	44.3695	55.9883	64.2292	69.831	75.5585	78.7615	86.5847	90.591	87.7152	90.6557	93.2309
t1-C	0	5.18982	5.88674	19.6839	33.0208	44.7687	56.4837	65.7332	74.0155	77.061	82.1457	82.1116	87.5557	86.0457	84.7698	86.192	80.7242
t1-C	0	-10.1671	-4.90868	-10.5917	-4.9562	-0.90045	2.23751	9.58018	9.8636	18.5018	37.5771	45.9701	55.7371	59.1537	66.9394	72.2168	76.0634
t1-C	0	2.42109	8.48763	14.2465	21.1592	33.4158	37.8971	41.6116	49.4772	53.6679	55.2024	51.3428	57.2057	65.0745	60.8634	67.7141	67.5533
1C7-C	0	12.4073	24.5547	36.7373	44.7816	53.7842	58.0863	56.9197	57.3225	57.6228	60.6876	61.6222	65.5466	64.0859	66.9676	62.4563	66.2641
1C7-C	0	7.40744	19.3939	26.623	29.2336	32.9156	35.9034	35.371	36.4784	35.0888	34.1169	37.6592	39.607	41.5475	41.4051	37.3409	36.1281
1C7-C	0	5.9776	17.7801	30.8197	42.2055	55.5853	52.5579	63.9901	59.6855	73.4597	79.0482	68.6064	70.645	79.5302	75.72	83.5432	80.8495
1C7-C	0	6.22597	15.9479	27.7329	36.1996	38.0111	39.2695	43.0072	55.311	51.6122	58.1766	65.7008	73.9545	77.2338	75.4341	72.8059	81.4184
1C5-C	0	2.46923	8.56994	37.0788	42.7183	55.6901	65.1225	65.9324	70.8744	68.5957	67.762	66.257	72.2561	70.8137	69.9867	74.4932	74.1014
1C5-C	0	1.06264	11.7526	29.9527	36.4185	50.7061	55.9173	61.1624	67.6856	70.1734	72.3029	71.4731	75.5582	74.1425	72.4466	68.8772	65.8646
1C5-C	0	4.37574	20.2599	34.4083	50.5756	59.2062	72.6976	71.4876	74.7848	75.3099	77.4702	77.9535	80.6321	78.954	81.5997	88.6589	89.6792
1C5-C	0	-0.3212	7.86543	16.1927	37.4983	45.9868	57.1888	60.9147	65.7642	66.7763	61.6157	62.6108	60.9179	54.2715	54.7993	57.0351	63.6014
Col-C	0	12.4146	23.3253	37.9212	52.8121	58.5145	61.3688	65.0037	69.6727	66.7727	72.4057	74.5128	79.9572	81.6361	84.5132	83.2223	82.3711
Col-C	0	7.8121	7.95955	26.3481	31.2559	38.5608	49.8378	55.5252	57.0451	58.3089	59.2155	56.0658	53.9999	59.9094	51.2456	49.3431	55.5949
Col-C	0	5.80441	14.1874	31.5156	42.6067	50.8791	55.9693	63.5675	74.1535	75.8069	78.7321	80.7127	85.0271	87.3391	90.0502	96.8987	92.4271
Col-C	0	10.1	10.6528	28.549	37.3791	40.3446	54.6086	55.0867	60.1297	62.1733	68.1578	68.5943	67.7874	78.7543	83.3952	80.5313	79.6185
afb1-C	0	8.87586	14.2186	30.7783	47.9835	52.9708	71.0765	75.746	85.4711	89.4145	94.1727	99.7243	101.558	99.4161	97.3205	105.891	106.047
afb1-C	0	6.83929	15.8293	30.1389	40.1566	55.3789	65.5373	64.564	71.7353	77.2848	75.4248	76.5842	76.5811	73.9017	76.5161	76.7571	79.7404
afb1-C	0	7.20153	17.3539	32.9358	48.3309	52.8694	57.8599	66.2109	73.2373	73.6634	74.7439	77.3978	74.9537	77.9803	74.1391	76.0963	73.3329
afb1-C	0	4.53386	12.3143	24.561	35.0409	46.2123	54.1922	61.7876	68.8503	71.9948	76.8084	77.1393	78.8051	75.8817	78.9251	75.5091	75.2432
t345-C	0	-0.76675	9.22769	27.1412	31.3622	41.9342	48.2034	54.7704	58.7203	60.4485	67.2183	68.9662	76.2003	74.6199	77.2724	81.6425	86.7003
t345-C	0	-2.11685	11.1058	34.0573	38.5543	52.5538	55.0134	59.0277	64.1219	67.1119	66.6392	67.1456	69.6578	75.39	71.9207	74.4671	77.8108
t345-C	0	4.60353	19.0034	31.2828	40.7794	42.4726	56.2762	52.9317	56.1915	58.4486	56.8588	60.3194	59.6907	62.7206	61.4989	64.2637	63.2581
t345-C	0	-1.241	9.23056	15.399	19.3906	26.9731	36.0823	36.7857	48.711	54.4772	58.0171	59.6704	60.0164	57.2275	59.1578	60.7802	61.5524
t1345-C	0	6.80156	15.3237	23.9831	41.01	45.5555	55.8039	56.9312	61.0838	64.4184	68.8068	71.7105	76.0811	77.0873	75.7556	70.5816	73.0017
t1345-C	0	0.35166	4.02175	11.651	21.3579	28.0961	43.6291	37.5677	43.9782	40.0166	42.2051	40.0974	47.9609	54.7436	59.4132	64.3033	72.051
t1345-C	0	3.38796	1.9281	6.73261	13.9356	26.9837	41.6072	40.1905	56.5667	60.8417	67.087	72.4832	77.8679	84.4651	88.9362	89.9418	94.3186
t1345-C	0	1.88098	1.71641	-1.10192	9.96654	17.2512	25.6114	35.1046	42.632	49.4832	53.7683	58.8188	63.326	68.5936	76.1381	76.9145	81.3457
afb1-D	0	-3.1571	-0.35874	10.5709	16.4488	31.4402	45.9532	53.8593	71.1261	76.3344	85.2672	89.7116	94.3627	97.8188	102.925	103.4	105.542
afb1-D	0	1.54528	6.77607	23.2634	38.8196	50.9832	56.5969	67.1361	73.2536	77.6427	79.2832	78.6593	77.8882	82.9281	81.1921	81.9727	80.3304
afb1-D	0	0.02273	5.13663	12.707	24.7156	35.7783	46.1684	57.935	67.7777	75.5597	79.9317	80.5096	84.2277	82.5637	84.1602	86.2722	85.3879
afb1-D	0	9.25067	17.0234	32.5645	46.8715	61.2942	69.3567	82.1122	85.7858	89.2839	90.7159	89.8407	89.8402	86.582	83.4366	87.3264	83.6166
tir1-D	0	-1.06207	9.71476	25.3477	30.2606	41.5502	42.7366	53.1773	59.4867	63.2948	69.8866	72.295	73.911	75.1023	79.3324	81.8315	80.4254
tir1-D	0	5.31707	13.2137	28.3033	42.55	57.1256	61.488	67.24	71.258	74.8407	77.149	76.9451	76.5105	74.8027	70.9959	73.538	78.5023
tir1-D	0	15.4668	22.9458	34.0994	48.8296	55.7205	68.9572	73.0684	75.4605	79.0129	82.6469	79.4851	77.387	79.1924	75.4097	77.6522	75.5897
tir1-D	0	6.63398	17.1174	32.6632	42.9801	54.3361	58.9342	71.4927	72.4718	77.1028	77.41	77.0397	79.0261	80.4885	77.429	80.1122	78.1489
t1345-D	0	4.75463	17.5736	20.8294	36.0641	43.209	51.0006	63.7807	70.4655	73.8673	79.1805	79.7277	78.2831	76.9858	72.9203	70.782	72.3508
t1345-D	0	5.39749	14.1194	20.4814	34.4487	40.3633	44.171	49.3064	51.8572	51.0288	54.7657	56.1274	61.1918	63.2118	63.2685	60.4349	61.6009
t1345-D	0	-6.67527	-0.83819	4.61004	12.9994	21.6864	29.0268	31.9147	40.0406	42.8598	43.3174	51.5774	52.2078	50.8433	55.4119	55.2684	49.0456
t1345-D	0	0.90884	4.23199	15.2244	29.0737	36.5883	40.1702	38.0525	50.7108	55.5077	62.2717	62.1001	66.0448	64.7476	67.0495	67.6924	72.8513
1C7-D	0	2.16782	18.9522	34.676	38.1192	41.4653	47.3537	38.1145	42.1303	46.9815	40.5204	36.5288	47.3035	47.1582	52.3602	45.2658	49.6242
1C7-D	0	11.5888	16.4458	35.8768	42.8865	46.0264	48.0073	51.343	53.8214	52.9015	57.7235	58.5829	61.1929	65.0178	70.0961	65.8809	67.2406
1C7-D	0	8.24431	18.401	31.6403	43.3519	52.1434	53.198	58.4335	58.5041	56.859	58.3805	51.522	59.4247	59.2208	68.2732	72.2502	71.3767
1C7-D	0	9.54297	20.0208	32.1736	46.4892	43.452	57.0234	63.9081	64.2066	54.8504	53.2875	53.6815	66.6803	63.3778	70.2148	71.7001	69.4996
t1-D	0	4.77178	12.612	19.8044	29.4646	40.4677	51.579	63.6324	72.8156	74.2617	78.0786	76.67	81.5206	79.1049	76.6944	75.4974	76.1671
t1-D	0	0.15666	-2.36218	-0.83708	6.39098	12.9096	23.4298	42.4894	55.0601	61.5669	72.7057	83.6352	85.4823	92.0735	96.8974	97.6842	107.195
t1-D	0	1.16746	3.09832	18.5214	33.5275	51.6274	69.46	79.7319	84.1542	88.045	88.4341	90.4021	97.0318	96.78	98.6378	101.674	104.39
t1-D	0	-2.42466	-7.90016	2.23651	7.35539	15.2502	26.5081	32.7452	39.0269	47.3096	53.0389	64.717	74.6277	76.6875	83.6785	88.1676	86.8878
Col-D	0	4.66995	6.73072	18.5996	24.4195	41.7714	48.8548	57.8575	62.7851	71.466	79.3348	80.2345	82.2237	81.3745	80.2072	83.6479	79.3645
Col-D	0	7.29609	15.2782	28.1285	46.9876	60.9243	74.788	84.9337	92.6984	97.6485	100.46	102.438	101.073	103.756	102.307	102.164	97.1729
Col-D	0	5.42206	17.0399	30.0391	43.79	53.2897	63.2783	67.8896	73.2359	79.3122	84.7101	88.7486	88.4624	87.0231	83.8548	84.41	84.0348
Col-D	0	7.31621	17.2356	31.8056	32.1791	48.4855	56.0479	65.8028	64.3416	69.6424	67.7715	67.7311	72.181	82.698	80.6107	77.5911	79.8181
1C5-D	0	2.0966	10.1202	25.5426	31.7675	40.308	50.9385	57.0935	62.124	63.2625	63.7991	65.2857	70.3384	73.4975	72.1111	74.3376	77.3933
1C5-D	0	7.74666	16.3363	31.4585	39.9187	46.3787	45.5141	50.3106	50.7844	52.3764	57.2821	63.3257	64.5275	70.5471	68.5985	73.519	64.1745
1C5-D	0	6.88168	16.5305	38.9333	61.116	71.7455	75.5908	83.2473	83.4995	83.776	88.0471	88.0698	83.8989	83.2068	83.074	83.0877	79.3841
1C5-D	0	12.9367	15.8793	25.6278	31.5081	29.273	36.0932	37.3604	40.2734	42.1527	51.475	50.241	70.8819	71.0419	65.9645	76.5675	71.4219
t345-D	0	-0.50051	6.19358	14.6931	21.7966	23.6239	22.7584	25.1338	28.7526	34.9961	28.0582	33.0356	31.9191	35.4	40.8352	39.4612	31.4899
t345-D	0	6.65979	12.7285	21.8748	33.5359	37.2384	42.25	50.4478	50.6492	56.7407	57.2256	61.1451	65.9832	67.4463	70.3324	67.7399	67.6349
t345-D	0	4.26759	14.315	29.8409	45.5228	51.5114	57.1588	59.8183	60.8438	65.4199	64.2878	60.9231	62.0571	63.408	66.0938	66.6036	64.9771
t345-D	0	3.43931	16.9548	29.7275	37.8388	49.9132	54.6505	63.6869	66.8578	66.7899	69.2836	65.1968	67.5223	65.1179	68.4464	66.9631	69.6594
mean ∠ from hori
Col-0	0	3.96963	12.0652	23.9708	36.7652	46.6812	55.2305	63.2079	69.848	72.6443	75.839	78.0206	79.0443	81.6752	81.6291	81.0971	80.4637
afb1-3	0	4.0037	10.1454	23.3353	35.507	46.7117	57.672	65.7965	73.647	78.0987	80.92	82.6208	82.8122	82.8733	82.0774	82.9949	83.2418
tir1-1	0	2.4371	9.79152	20.3349	31.8821	42.4932	50.8526	58.1173	63.8699	67.3939	69.388	71.5314	73.3834	75.1428	74.9694	75.7544	76.5715
tir1-1 afb1-3	0	1.06801	5.06574	11.7958	21.7124	32.5907	43.3188	52.6563	59.8236	65.2494	70.9368	75.47	79.9487	82.262	82.9369	85.0273	85.3335
tir1afb345	0	2.71763	12.0142	21.7699	28.7689	35.5054	42.1258	46.0366	50.5728	55.441	57.1924	59.0875	59.4844	63.2598	63.3357	64.4314	65.7343
tir1afb1345	0	1.87945	6.08582	13.0207	23.9621	30.4548	37.2111	42.4319	49.1426	53.7299	57.2662	58.687	61.212	62.8412	62.7873	63.8646	62.519
afb1 AFB1-mCitrine#7	0	7.33114	16.7108	29.1493	38.2538	44.0865	47.8904	50.9681	53.4251	54.3039	56.3997	56.0311	59.8244	62.3843	62.6127	63.5423	63.3694
afb1 AFB1-mCitrine#5	0	4.21616	14.0537	30.1459	42.7457	53.6993	59.8227	64.9121	67.3864	69.3436	71.432	72.7037	75.5961	76.3008	73.9268	76.4113	76.1593
SE
Col-0	0	1.61406	1.51276	2.10512	2.53935	2.37163	2.48784	2.28087	2.49078	2.52816	2.66841	3.04413	3.03911	2.78276	2.96338	3.28067	2.77686
afb1	0	0.87891	1.28645	1.93862	2.38523	2.21632	2.42156	2.44072	2.28278	2.27827	2.54578	2.59975	2.90839	2.82615	2.82258	3.08435	3.24783
tir1	0	1.51757	1.88859	3.00954	3.42381	3.36506	3.16409	2.80153	2.85691	2.62679	3.19674	3.06559	3.03034	2.74571	2.88008	3.29922	2.91291
tir1afb1	0	1.26745	1.74145	2.48738	3.00076	3.72859	4.21292	4.25735	4.50597	4.32535	3.62253	3.40342	3.11228	2.9639	3.10114	3.22056	3.46635
tir1afb345	0	0.746184	1.09601	1.77088	2.34653	2.59524	2.6445	2.7787	2.68208	2.46362	2.79229	2.70536	2.77334	2.88739	2.55551	2.78365	3.33263
tir1afb1345	0	0.981693	1.61818	2.06733	2.7032	2.46942	2.79225	2.72431	2.82622	3.00214	2.9656	3.39995	3.19222	3.38981	3.32102	3.2938	4.02292
1C7	0	0.997859	0.990885	1.51823	1.5763	1.77879	2.04391	2.56155	2.38288	2.39632	2.97458	2.67614	2.79521	2.83991	2.93071	3.21683	3.31448
1C5	0	1.13569	1.32801	1.68864	2.38995	2.69283	2.85898	3.08412	3.18768	3.04251	3.06349	3.03537	2.3444	2.23965	2.40501	2.32321	2.30845
