# Supplementary material for: Genetic analysis of the Arabidopsis TIR1/AFB auxin receptors reveals both overlapping and specialized functions
Source: eLife journal article supplement (doi:10.7554/elife.54740), 2020-02-17
Supplement: supp [file elife_poa_e54740_Figure_1_figure_supplement_4_source_data_1.xlsx]

## Sheet: Figure 1—figure supplement 4A-D
Inflorescence stem length (cm)			BATCH A																															Plant 5 damaged while transplanting		BATCH C				BATCH B
line	Col-0 a	tir1-1 a	afb1-3	afb2-3	afb3-4	afb4-8	afb5-5	afb12*	afb13	afb14	afb15	afb23	afb2-1 3-1	afb24	afb25	afb34	afb35	afb45	afb124	afb125*	afb134	afb135	afb145	afb234	afb235	afb245	afb345	afb1234	afb1235*	afb1245	afb1345	afb2345	afb12345	Col-0 c	tir1-1 c	afb12	afb123	afb125	tir1afb12	Col-0 b	tir1-1 b	tir1-10	tir1afb1	tir1afb2	tir1afb2-1	tir1afb3	tir1afb3-1	tir1afb4	tir1afb5
average	37.68	34.84	33.2	33.75	35.24	35.74	29.62	34.5	33.8	32.86	30.92	31.26	27.8	32.9	28.76	31.96	29.48	26.8	32.56	28.92	32.26	28.74	28.72	30.64	25.2	28.02	25.44	32.48	27.62	27.74	24.08	17.82	15.96	31.175	25.48	30.1	30.06	24.7	25.48	32.74	29.84	29.68	29.24	28.62	26.8	24.86	25.08	31.3	24.64
SE	1.91818	1.47262	2.43187	2.86138	1.53056	1.07963	1.31164	1.28452	1.35794	2.75038	1.3124	1.10526	1.96596	1.16619	2.25668	2.36656	0.975397	1.13974	1.57753	1.13947	1.01173	0.712461	1.49613	1.41725	1.64773	1.72377	0.350143	0.919456	1.38036	1.35669	0.739189	0.892973	0.646993	1.01355	0.821827	1.00896	0.611228	0.754321	0.300666	0.697567	0.827406	1.0837	0.7494	0.891291	1.34833	0.846522	0.737157	1.83385	1.32914
n	5	5	5	4	5	5	5	5	5	5	5	5	5	5	5	5	5	5	5	5	5	5	5	5	5	5	5	5	5	5	5	5	5	4	5	5	5	5	5	5	5	5	5	5	5	5	5	5	5
plant 1	31	32	25.5	28	35.5	34	27	34	32	35.5	29	28	31	36	30	34.8	30.2	29.8	34.8	29.4	32.5	30.5	28.6	29.8	21	26	25	34	25.8	24.5	22	16.5	13.5	28.4	26.1	30.4	28.5	21.8	26.1	33.5	29.8	27.1	26.4	26.5	26.8	25.6	24	31.2	26.8
plant 2	37	33.4	33.5	31.5	33	37	30.8	37	38.8	36.5	35	33.3	29.5	33.5	34	33.7	30.5	28.5	32.5	31	33.8	27.2	31	32.5	23.5	23.5	25.7	30.4	25.5	24.5	24	16.5	16.2	31.9	23.4	26.4	29.5	25.1	24.5	34.6	26.9	30.3	30.3	28.5	22.1	21.5	24	25.9	20.4
plant 3	37.5	33.8	30.5		32.5	32.5	26	30	31	23.5	30	32.8	31	32	26	31.8	32.2	24.6	35	31.2	32.6	30	30	34	25.5	31.8	24.8	35	33	31	25.4	20.9	16.8	31.2	28.2	30.2	29.3	24.9	26	33.1	32	30.5	30.5	31.5	27.5	26.1	24.1	34.5	26
plant 4	41.3	34.5	38.8	41.5	41	38.4	32.5	37	33	30	27.8	29.2	27	34	32.3	36.5	27.5	27.3	34	28	34	29	31	31.2	31	32.3	26.7	32.5	26.5	29.3	26	18.8	17.2	33.2	24.3	32.5	31.5	26.1	25.7	30.5	30.4	27.5	29.9	29.5	30.5	25.6	27.8	36	27.3
plant 5	41.6	40.5	37.7	34	34.2	36.8	31.8	34.5	34.2	38.8	32.8	33	20.5	29	21.5	23	27	23.8	26.5	25	28.4	27	23	25.7	25	26.5	25	30.5	27.3	29.4	23	16.4	16.1		25.4	31	31.5	25.6	25.1	32	30.1	33	29.1	27.1	27.1	25.5	25.5	28.9	22.7
Rosette Diam (cm)
line	Col-0 a	tir1-1 a	afb1-3	afb2-3	afb3-4	afb4-8	afb5-5	afb12*	afb13	afb14	afb15	afb23	afb2-1 3-1	afb24	afb25	afb34	afb35	afb45	afb124	afb125*	afb134	afb135	afb145	afb234	afb235	afb245	afb345	afb1234	afb1235*	afb1245	afb1345	afb2345	afb12345	Col-0 c	tir1-1 c	afb12	afb123	afb125	tir1afb12	Col-0 b	tir1-1 b	tir1-10	tir1afb1	tir1afb2	tir1afb2-1	tir1afb3	tir1afb3-1	tir1afb4	tir1afb5
average	11.42	11.04	13.16	12.44	13.06	13.58	12.74	11.88	13.1	13.3	13.24	12.48	11.72	12.82	11.4	11.54	12.94	13.26	12.06	12.8	12.42	12.18	12.4	13.04	13.04	13.2	12.66	12.38	12.48	12.96	12.22	6.54	7.22	8.325	7.84	9.3	9.82	9.12	7.96	11.8	9.9	10.66	10.78	9.36	9.16	11.06	10.06	11.76	11.5
SE	0.904102	0.208806	0.292575	0.193907	0.345832	0.491325	0.744043	0.542586	0.379473	0.32249	0.283901	0.354119	0.520961	0.436348	0.577062	0.614492	0.487442	0.430813	0.627375	0.512835	0.335261	0.336749	0.622896	0.370945	0.326497	0.662571	0.334066	0.397995	0.425911	0.496588	1.10788	0.348712	0.239583	0.344903	0.592115	0.402492	0.473709	0.399249	0.1249	1.19833	0.572713	0.568859	0.598665	0.263818	0.211187	0.472864	0.59716	0.314006	0.303315
n	5	5	5	5	5	5	5	5	5	5	5	5	5	5	5	5	5	5	5	5	5	5	5	5	5	5	5	5	5	5	5	5	5	4	5	5	5	5	5	5	5	5	5	5	5	5	5	5	5
plant 1	10.3	10.7	12.4	12.2	12.2	13	13.6	11.2	14	13	13.8	12	9.9	13.8	9.5	11.5	13.2	14.5	11.4	14.8	13	12	13.2	13.8	13.5	14.4	12	12	13.2	14.2	11.5	6.6	6.5	8	7.1	8.8	8.7	8.4	8.1	12.2	12.1	10.1	11.1	9.2	8.9	12	9.2	12.4	11.8
plant 2	11	11.7	13	12	13.2	12.9	14.7	13.2	12.8	13.8	12.6	12.8	12.6	13.2	12.6	13.2	14.2	14	13.8	12.2	12.8	12	12.8	12.8	12.8	12.2	12.6	12.9	13.3	13.5	12.2	7.8	6.8	9.2	6.6	8.5	9	10.5	7.5	14.2	9.8	10	9.5	8.6	8.9	10.2	12	11.4	12.5
plant 3	10.5	11.2	13	13	14.2	13.5	11	12	11.8	14.3	13.1	13.7	12.4	13.1	12.5	11.6	13.2	12.2	12.2	12.3	11.3	12.9	13.8	13	12.8	14.4	13.8	13.2	11	11.2	14.8	5.8	7.6	7.6	10	9	11.4	8.4	8.1	12.8	9.4	12.8	11.1	9.6	9	9.7	8.5	12.1	11.4
plant 4	15	11.1	14.2	12.2	13.2	15.5	13.4	10.2	13.3	12.6	12.7	11.7	11.2	12.8	11.6	9.4	11.2	12.6	12.8	12.7	13	12.9	12	11.8	14	13.9	12.9	12.8	12.1	12.9	14.1	6	7.7	8.5	7.4	10.8	10	9.5	8.2	7.2	8.8	9.6	9.5	10.2	9	12	10.1	12.2	11
plant 5	10.3	10.5	13.2	12.8	12.5	13	11	12.8	13.6	12.8	14	12.2	12.5	11.2	10.8	12	12.9	13	10.1	12	12	11.1	10.2	13.8	12.1	11.1	12	11	12.8	13	8.5	6.5	7.5		8.1	9.4	10	8.8	7.9	12.6	9.4	10.8	12.7	9.2	10	11.4	10.5	10.7	10.8
Total number of inflorescence branches
line	Col-0 a	tir1-1 a	afb1-3	afb2-3	afb3-4	afb4-8	afb5-5	afb12*	afb13	afb14	afb15	afb23	afb2-1 3-1	afb24	afb25	afb34	afb35	afb45	afb124	afb125*	afb134	afb135	afb145	afb234	afb235	afb245	afb345	afb1234	afb1235*	afb1245	afb1345	afb2345	afb12345	Col-0 c	tir1-1 c	afb12	afb123	afb125	tir1afb12	Col-0 b	tir1-1 b	tir1-10	tir1afb1	tir1afb2	tir1afb2-1	tir1afb3	tir1afb3-1	tir1afb4	tir1afb5
average	20.8	24.2	19.2	24.8	22.6	24.4	24	20.8	23	19.2	24.4	21.6	21.2	20.2	22.6	21	28.2	29.6	22	27.2	22.4	24.8	30	26.8	26.4	31.6	32.8	24.4	27.2	32	32.4	41	36.2	14	16	15.6	15.8	22.4	15.6	21	21.2	21.4	23.8	17.4	19.4	20	25.8	25.8	31.2
SE	2.39583	2.13073	2.39583	2.4779	1.69115	2.71293	1.58114	2.08327	2	2.0347	2.65707	2.29347	1.42829	1.49666	1.28841	2.34521	2.43721	2.76767	1	1.49666	1.98997	1.65529	1.67332	1.56205	2.24944	2.35797	2.39583	1.28841	2.35372	3.83406	2.13542	5.43139	3.05614	0.912871	1.26491	1.28841	1.65529	1.72047	1.2083	1.30384	0.8	2.56125	1.74356	0.979796	1.2083	1.48324	1.82757	1.2	2.35372
n	5	5	5	5	5	5	5	5	5	5	5	5	5	5	5	5	5	5	5	5	5	5	5	5	5	5	5	5	5	5	5	5	5	4	5	5	5	5	5	5	5	5	5	5	5	5	5	5	5
	5.2	5	6.2	6	6	7	5.6	6	7	7.2	6.8	5.6	7	5.6	6.8	6.2	7.2	8.6	5.6	7.8	7	8	7.6	6.6	7	9.6	8.2	5.8	8.2	10	9.6	12.8	13.2	5.25	5.2	5.6	6.2	6.8	5	6.8	5.8	5.2	6	5	6.8	7.2	7.6	7.6	7.2
	15.2	16.8	12.6	18.8	15.8	17.4	18.2	14.6	15.6	12	16.8	15.8	14.2	14.6	15.6	14.8	20.4	21	16.4	19	15.2	16.6	22	19.4	19.2	22	24.4	17.8	19	21.4	22	27	21.8	8.5	10.6	9.8	9.2	15.6	10.2	14.2	14.8	16.2	16.8	11.8	12.6	12.4	17.4	18	23.4
	0.4	2.4	0.4	0	0.8	0	0.2	0.2	0.4	0	0.8	0.2	0	0	0.2	0	0.6	0	0	0.4	0.2	0.2	0.4	0.8	0.2	0	0.2	0.8	0	0.6	0.8	1.2	1.2	0.25	0.2	0.2	0.4	0	0.4	0	0.6	0	1	0.6	0	0.4	0.8	0.2	0.6
plant 1 total	19	17	10	16	19	16	21	20	20	19	16	16	25	21	21	19	21	31	19	27	19	30	31	27	25	35	40	24	27	22	25	34	25	16	14	12	14	17	14	17	22	14	25	14	17	16	25	28	28
plant 2 total	19	23	22	27	22	25	27	26	22	19	31	27	23	23	21	25	27	23	23	25	20	23	29	30	26	27	26	29	25	28	36	41	43	15	15	15	11	25	13	24	20	21	19	17	22	17	21	27	32
plant 3 total	16	24	19	31	19	25	20	15	18	12	22	20	17	15	27	26	27	24	21	23	19	25	36	29	24	27	31	24	20	28	31	33	40	13	19	16	17	22	20	23	24	28	29	18	21	23	24	28	37
plant 4 total	30	29	23	26	27	33	28	18	26	24	24	18	22	23	20	13	30	32	22	31	29	26	27	21	22	39	31	21	30	41	37	35	36	12	13	20	21	27	15	19	20	18	21	20	21	23	27	24	35
plant 5 total	20	28	22	24	26	23	24	25	29	22	29	27	19	19	24	22	36	38	25	30	25	20	27	27	35	30	36	24	34	41	33	62	37		19	15	16	21	16	22	20	26	25	18	16	21	32	22	24
plant 1 1°	4	4	6	6	7	7	5	7	7	6	6	6	6	4	6	6	8	9	5	9	7	8	8	6	7	11	7	6	7	12	9	13	15	6	4	5	5	6	6	8	8	4	6	5	7	9	7	8	8
plant 2 1°	6	5	5	7	7	5	6	7	5	7	7	5	5	5	7	6	6	6	4	7	7	9	6	7	6	7	7	7	9	8	9	10	13	7	5	5	6	7	5	8	5	5	5	5	7	5	10	9	7
plant 3 1°	4	6	7	6	5	7	5	6	6	9	8	5	8	4	7	7	6	6	6	6	7	9	8	5	7	8	12	6	6	8	8	13	12	5	6	6	6	6	5	5	6	7	7	5	6	7	7	8	8
plant 4 1°	8	6	6	6	5	9	7	5	8	7	7	7	7	8	6	4	6	10	6	9	8	7	7	6	8	13	6	4	10	9	11	11	15	3	5	6	8	8	5	6	5	5	5	5	7	7	6	7	7
plant 5 1°	4	4	7	5	6	7	5	5	9	7	6	5	9	7	8	8	10	12	7	8	6	7	9	9	7	9	9	6	9	13	11	17	11		6	6	6	7	4	7	5	5	7	5	7	8	8	6	6
plant 1 2°	15	13	4	10	12	9	16	13	13	13	10	10	19	17	15	13	13	22	14	18	12	21	23	21	18	24	33	18	20	10	16	21	10	10	10	7	8	11	8	9	14	10	19	9	10	7	18	20	18
plant 2 2°	13	18	17	20	15	20	20	18	15	12	22	22	18	18	13	19	21	17	19	17	13	14	23	23	20	20	19	22	16	20	27	31	30	8	10	10	5	18	8	16	14	16	13	12	15	12	11	18	25
plant 3 2°	12	17	12	25	14	18	15	9	12	3	14	15	9	11	20	19	21	18	15	17	12	16	28	24	17	19	19	14	14	18	22	20	28	8	13	10	11	16	14	18	18	21	19	12	15	16	16	20	29
plant 4 2°	22	20	15	20	19	24	21	13	18	17	17	11	15	15	14	9	21	22	16	22	21	19	18	14	14	26	25	17	20	31	25	24	21	8	8	13	12	19	10	13	14	13	16	13	14	15	19	16	27
plant 5 2°	14	16	15	19	19	16	19	20	20	15	21	21	10	12	16	14	26	26	18	21	18	13	18	15	27	21	26	18	25	28	20	39	20		12	9	10	14	11	15	14	21	17	13	9	12	23	16	18
plant 1 3°	0	0	0	0	0	0	0	0	0	0	0	0	0	0	0	0	0	0	0	0	0	1	0	0	0	0	0	0	0	0	0	0	0	0	0	0	1	0	0	0	0	0	0	0	0	0	0	0	2
plant 2 3°	0	0	0	0	0	0	1	1	2	0	2	0	0	0	1	0	0	0	0	1	0	0	0	0	0	0	0	0	0	0	0	0	0	0	0	0	0	0	0	0	1	0	1	0	0	0	0	0	0
plant 3 3°	0	1	0	0	0	0	0	0	0	0	0	0	0	0	0	0	0	0	0	0	0	0	0	0	0	0	0	4	0	2	1	0	0	0	0	0	0	0	1	0	0	0	3	1	0	0	1	0	0
plant 4 3°	0	3	2	0	3	0	0	0	0	0	0	0	0	0	0	0	3	0	0	0	0	0	2	1	0	0	0	0	0	1	1	0	0	1	0	1	1	0	0	0	1	0	0	2	0	1	2	1	1
plant 5 3°	2	8	0	0	1	0	0	0	0	0	2	1	0	0	0	0	0	0	0	1	1	0	0	3	1	0	1	0	0	0	2	6	6		1	0	0	0	1	0	1	0	1	0	0	1	1	0	0
Number of Lateral Roots (emerged)
line	Col-0 a	tir1-1 a	afb1-3	afb2-3	afb3-4	afb4-8	afb5-5	afb12*	afb13	afb14	afb15	afb23	afb2-1 3-1	afb24	afb25	afb34	afb35	afb45	afb124	afb125*	afb134	afb135	afb145	afb234	afb235	afb245	afb345	afb1234	afb1235*	afb1245	afb1345	afb2345	afb12345	Col-0 c	tir1-1 c	afb12	afb123	afb125	tir1afb12	Col-0 b	tir1-1 b	tir1-10	tir1afb1	tir1afb2	tir1afb2-1	tir1afb3	tir1afb3-1	tir1afb4	tir1afb5
average	6.83333	3.625	7.16667	5.36364	6.66667	7.16667	6.58333	5.75	5.83333	7.33333	5.33333	3.08333	5.58333	5.25	3.5	5.16667	3.91667	4.25	6.58333	5.08333	6.83333	5	6.16667	3.83333	1.66667	3	2.83333	5.66667	2.33333	3.16667	4.91667	0.416667	0.416667	6.4375	3.625	6.73333	3.40224	4.1875	2.625	9.16667	4.95833	6.125	6.91667	2.83333	2.54167	4.20833	6	4.16667	4.25
SE	0.468836	0.350013	0.672324	0.560401	0.607196	0.385992	0.596179	0.591928	0.51981	0.699928	0.432283	0.434468	0.434468	0.697669	0.621582	0.505025	0.312815	0.304636	0.556754	0.722562	0.694495	0.389249	0.505025	0.365839	0.309773	0.348155	0.241	0.432283	0.309773	0.405144	0.690392	0.148647	0.192996	0.386962	0.30104	0.300264	0.452182	0.356122	0.201556	0.457817	0.382967	0.331403	0.596179	0.359482	0.269051	0.262231	0.536543	0.457817	0.217597
n	24	24	12	11	12	12	12	12	12	12	12	12	12	12	12	12	12	12	12	12	12	12	12	12	12	12	12	12	12	12	12	12	12	16	16	15	16	16	16	12	24	24	12	24	24	24	12	12	12
seedling 1	5	2	3	5	7	8	7	5	6	6	5	4	5	4	1	7	4	5	3	4	5	3	5	6	1	4	4	4	2	2	9	0	0	5	4	6	3	4	2	10	4	6	7	3	3	5	5	4	5
seedling 2	6	3	6	8	5	7	5	3	5	9	6	4	3	2	0	7	6	5	6	3	11	7	9	4	2	5	4	6	1	1	4	0	0	5	2	6	3	4	2	11	6	8	7	5	4	1	7	3	4
seedling 3	5	1	4	4	3	5	5	3	4	11	6	3	6	2	2	5	4	6	6	2	10	4	6	3	2	5	3	4	1	3	5	1	1	7	4	6	4	3	3	11	5	8	9	5	4	7	5	4	4
seedling 4	4	3	10	5	7	7	4	3	4	6	5	4	8	4	1	8	4	4	4	3	8	3	6	5	2	3	3	4	1	6	7	0	0	7	4	7	6	4	3	10	6	8	5	2	3	4	4	2	5
seedling 5	8	2	8	7	8	7	3	7	8	10	5	6	5	6	4	6	4	3	7	6	8	5	6	4	4	3	2	4	2	3	7	0	1	6	4	9	6	6	3	10	3	2	9	6	5	5	3	3	5
seedling 6	6	6	5	4	9	7	7	7	4	5	7	3	4	5	3	6	4	4	7	3	7	6	3	2	3	3	3	5	3	3	6	0	1	5	3	7	4	4	1	8	3	4	7	5	4	1	4	2	4
seedling 7	7	6	8	7	7	10	10	4	8	10	6	1	7	5	5	3	4	3	7	4	6	6	5	3	1	2	2	8	3	5	3	0	0	6	4	8	2	6	3	11	7	7	3	1	2	5	6	5	5
seedling 8	10	4	8	3	3	7	6	8	7	9	6	3	6	4	6	3	2	4	6	6	8	4	9	2	1	2	2	6	2	4	7	1	2	4	3	8	5	6	3	7	7	6	9	1	3	5	8	6	4
seedling 9	9	4	6	5	9	5	8	6	6	5	3	4	5	6	6	4	5	4	9	4	6	5	6	3	2	3	3	8	4	4	3	1	0	9	3	7	3	4	2	9	7	6	8	1	3	5	9	4	5
seedling 10	8	8	9	3	9	7	9	8	7	4	3	3	5	9	3	6	2	3	10	8	6	7	6	5	1	2	4	6	2	2	2	0	0	7	2	6	3	4	2	9	2	6	6	3	2	4	8	6	4
seedling 11	9	5	10		7	8	8	8	8	8	4	1	5	6	5	4	4	4	8	8	5	5	5	5	0	1	2	6	3	2	1	1	0	8	2	8	4	6	2	7	3	3	9	0	1	4	6	4	3
seedling 12	8	4	9	8	6	8	7	7	3	5	8	1	8	10	6	3	4	6	6	10	2	5	8	4	1	3	2	7	4	3	5	1	0	8	3	6	5	6	2	7	9	8	4	1	2	5	7	7	3
seedling 13	9	2																																7	6		3	2	3		5	5		4	5	4
seedling 14	6	4																																5	4	7	6	2	4		3	6		2	2	4
seedling 15	9	5																																5	4	5	6	3	4		5	6		5	4	5
seedling 16	9	6																																9	6	5	6	3	3		3	7		5	2	5
seedling 17	11	4																																							6	7		2	2	4
seedling 18	5	3																																							5	4		2	3	5
seedling 19	7	2																																							4	8		4	2	3
seedling 20	5	4																																							4	7		3	1	3
seedling 21	3	3																																							4	7		4	1	5
seedling 22	2	2																																							4	5		2	0	4
seedling 23	5	2																																							9	6		2	2	4
seedling 24	8	2																																							5	7		0	1	4
IAA-Roots (Ctl - 20 nM - 100 nM - 500nM) (See next tab for data)
line	Col-0 a	tir1-1 a	afb1-3	afb2-3	afb3-4	afb4-8	afb5-5	afb12*	afb13	afb14	afb15	afb23	afb2-1 3-1	afb24	afb25	afb34	afb35	afb45	afb124	afb125*	afb134	afb135	afb145	afb234	afb235	afb245	afb345	afb1234	afb1235*	afb1245	afb1345	afb2345	afb12345	Col-0 c	tir1-1 c	afb12	afb123	afb125	tir1afb12	Col-0 b	tir1-1 b	tir1-10	tir1afb1	tir1afb2	tir1afb2-1	tir1afb3	tir1afb3-1	tir1afb4	tir1afb5
no IAA/no IAA	1	1	1	1	1	1	1	1	1	1	1	1	1	1	1	1	1	1	1	1	1	1	1	1	1	1	1	1	1	1	1	1	1	1	1	1	1	1	1	1	1	1	1	1	1	1	1	1	1
20nM/no IAA	0.576103	0.787276	0.518854	0.753685	0.578	0.525151	0.697765	0.6758	0.589063	0.535522	0.608724	0.828897	0.798181	0.737438	0.757209	0.602051	0.717266	0.613136	0.724971	0.732013	0.680879	0.689058	0.643662	0.786748	0.802738	0.738347	0.623054	0.84855	0.851322	0.807947	0.727951	0.829352	0.817512	0.659156	0.759538	0.774399	0.882699	0.737179	0.926918
100nM/no IAA	0.141138	0.28503	0.0703699	0.168262	0.16183	0.140053	0.191255	0.202082	0.160102	0.141437	0.110362	0.240382	0.402435	0.272784	0.244706	0.20393	0.264619	0.245422	0.188931	0.26604	0.226032	0.291083	0.252157	0.431203	0.448551	0.339538	0.259159	0.324842	0.408743	0.311083	0.234405	0.381009	0.374214	0.210993	0.402285	0.285117	0.402261	0.338661	0.652486	0.19538	0.316879	0.352398	0.325989	0.60248	0.657993	0.390895	0.509082	0.393268	0.522688
500nM/no IAA																																		0.0528168	0.119277	0.0696536	0.117322	0.104256	0.200289	0.0710213	0.097495	0.0973276	0.114345	0.197817	0.214674	0.144493	0.151096	0.10891	0.149441
0 SE/noIAA	0.0314316	0.0232589	0.0458548	0.0385338	0.0315494	0.051899	0.0293791	0.0709323	0.0235492	0.0287253	0.0344803	0.0198271	0.0750336	0.045677	0.0236363	0.0475447	0.041171	0.0318706	0.0262204	0.0398349	0.029449	0.0522664	0.0273779	0.0324707	0.0442797	0.0242335	0.0232931	0.0359046	0.0106163	0.0239217	0.0255433	0.0435221	0.0501533	0.0156467	0.0213767	0.0291762	0.0447421	0.0410502	0.0285428	0.0450132	0.0281793	0.0220871	0.0347494	0.0269922	0.0268564	0.0314911	0.0391575	0.0495437	0.0317289
20 SE/noIAA	0.0281552	0.0295255	0.0414218	0.0460457	0.101287	0.0676106	0.0396466	0.0562724	0.0506653	0.0402417	0.029224	0.0550819	0.0727109	0.0429376	0.0378328	0.0575394	0.0360426	0.0402494	0.0277888	0.047214	0.0241589	0.0468279	0.0330453	0.0359937	0.0565575	0.0841516	0.0277337	0.0460215	0.0276115	0.0343135	0.0332011	0.0443103	0.0452766	0.0279465	0.0286427	0.0293751	0.0465638	0.0393153	0.0324261
100 SE/noIAA	0.0181034	0.0349206	0.0125593	0.0265949	0.0260732	0.0176252	0.023626	0.033346	0.0212179	0.020259	0.0146494	0.0180383	0.0380826	0.0326951	0.0257265	0.0234483	0.0289461	0.0323915	0.0210468	0.0228518	0.0333074	0.04467	0.0413403	0.0552173	0.0363942	0.0219636	0.0160558	0.0249478	0.0155678	0.0336681	0.0204642	0.0212543	0.0365651	0.0261258	0.0266812	0.0223997	0.0349867	0.0253978	0.0248535	0.0248195	0.0280129	0.0270359	0.0226267	0.0215111	0.0280116	0.0197938	0.0282564	0.0230549	0.0379948
500 SE/noIAA																																		0.003107	0.0168464	0.00546614	0.0206416	0.00787304	0.0244279	0.00530723	0.00567296	0.00477533	0.00720052	0.0157168	0.0162084	0.0124292	0.0163091	0.0100919	0.0103957
0 SE ratio	0.0444509	0.0328931	0.0648485	0.0544951	0.0446176	0.0733963	0.0415483	0.100313	0.0333036	0.0406238	0.0487625	0.0280397	0.106114	0.064597	0.0334268	0.0672384	0.0582246	0.0450719	0.0370812	0.056335	0.0416472	0.0739158	0.0387181	0.0459205	0.062621	0.0342713	0.0329414	0.0507768	0.0150138	0.0338304	0.0361237	0.0615495	0.0709275	0.0221277	0.0302312	0.0412614	0.0632748	0.0580537	0.0403655	0.0636583	0.0398515	0.0312358	0.049143	0.0381727	0.0379807	0.0445351	0.0553771	0.0700654	0.0448715
20 SE ratio	0.0281552	0.0295255	0.0414218	0.0460457	0.101287	0.0676106	0.0396466	0.0562724	0.0506653	0.0402417	0.029224	0.0550819	0.0727109	0.0429376	0.0378328	0.0575394	0.0360426	0.0402494	0.0277888	0.047214	0.0241589	0.0468279	0.0330453	0.0359937	0.0565575	0.0702656	0.0277337	0.0460215	0.0276115	0.0343135	0.0332011	0.0443103	0.0452766	0.0279465	0.0286427	0.0293751	0.0465638	0.0393153	0.0324261
100 SE ratio	0.0181034	0.0349206	0.0125593	0.0265949	0.0252489	0.0176252	0.023626	0.033346	0.0212179	0.020259	0.0146494	0.0180383	0.0380826	0.0326951	0.0257265	0.0234483	0.0289461	0.0323915	0.0210468	0.0228518	0.0333074	0.04467	0.0413403	0.0552173	0.0363942	0.0219636	0.0160558	0.0249478	0.0155678	0.0235234	0.0204642	0.0212543	0.0365651	0.0261258	0.0266812	0.0223997	0.0349867	0.0253978	0.0248535	0.0248195	0.0280129	0.0270359	0.0226267	0.0215111	0.0280116	0.0197938	0.0282564	0.0230549	0.0379948
500 SE ratio																																		0.003107	0.0168464	0.00546614	0.0206416	0.00787304	0.0244279	0.00530723	0.00567296	0.00477533	0.00720052	0.0157168	0.0162084	0.0124292	0.0163091	0.0100919	0.0103957
n (ethanol)	19	20	12	11	12	12	12	11	12	12	12	12	9	10	11	12	11	12	11	12	12	10	11	10	11	12	12	12	12	12	12	12	12	16	16	12	14	12	16	12	24	24	12	24	24	24	12	11	11
n (20 nM)	21	24	10	12	9	8	12	12	11	11	11	12	11	12	11	11	11	12	12	12	12	12	12	10	10	7	11	12	12	11	12	12	12	14	16	14	16	16	16
n (100 nM)	20	21	12	12	10	12	12	11	9	12	8	9	11	11	11	11	12	10	12	12	11	11	12	10	12	12	12	11	12	11	12	12	11	15	16	12	15	16	16	12	19	22	12	23	24	24	12	12	11
n (500 nM)																																		16	16	14	15	15	16	12	23	23	12	24	24	23	12	12	12
[truncated: 21 more columns]

## Sheet: Figure 1—figure supplement 4E
	Excluded seedlings were due to roots that did not stay attached to media on vertical plates
	Ethanol
line	Col-0 a	tir1-1 a	afb1-3	afb2-3	afb3-4	afb4-8	afb5-5	afb12*	afb13	afb14	afb15	afb23	afb2-1 3-1	afb24	afb25	afb34	afb35	afb45	afb124	afb125*	afb134	afb135	afb145	afb234	afb235	afb245	afb345	afb1234	afb1235*	afb1245	afb1345	afb2345	afb12345	Col-0 c	tir1-1 c	afb12	afb123	afb125	tir1afb12	Col-0 b	tir1-1 b	tir1-10	tir1afb1	tir1afb2	tir1afb2-1	tir1afb3	tir1afb3-1	tir1afb4	tir1afb5
average (mm)	18.37	17.7176	18.4899	17.3856	18.297	18.0168	17.5459	19.0849	19.0507	17.5956	20.5473	20.2007	18.0123	16.9778	18.6828	20.9253	17.9003	16.7392	22.0622	20.8567	19.8284	18.5901	19.8887	19.6957	17.1539	16.4887	16.2905	20.0838	19.8334	18.3213	19.1989	14.1714	15.44	27.9697	25.5438	31.0331	28.6509	32.0781	30.1235	18.7892	19.5205	21.4425	21.5597	18.7828	20.0467	19.5045	17.9786	18.5715	16.6424
SE (mm)	2.51681	1.84293	2.93704	2.22191	1.99968	3.23912	1.78569	4.48983	1.5541	1.75089	2.45424	1.38745	4.05458	2.45233	1.4646	3.44639	2.44426	1.84806	1.9186	2.87806	2.02279	3.07258	1.80593	2.02238	2.5192	1.38418	1.31447	2.49796	0.729395	1.51823	1.69881	2.13655	2.68249	1.75053	2.18417	3.13649	4.79643	4.56157	3.43923	2.9298	2.69481	2.32017	2.59526	2.48373	2.63752	3.00904	2.43872	3.05163	1.75133
		0.364459	0.908042	0.277062	0.929388	0.751374	0.29598
n	19	20	12	11	12	12	12	11	12	12	12	12	9	10	11	12	11	12	11	12	12	10	11	10	11	12	12	12	12	12	12	12	12	16	16	12	14	12	16	12	24	24	12	24	24	24	12	11	11
seedling 1 (pix)	412.246	503.051	468.33	460.047	494.514	412.064	441.837	282.953	436.686	426.742	547.991	522.436		367.546	460.211	380.661	415.011	421.647	529.036	499.752	502.244	410.89	471.556	428.374	533.366	344.151	402.601	572.865	451.928	422.126	437.228	407.485	376.199	610.186	571.177	637.39	458.826		737.019	426.761	386.885	476.793	480.27	459.182	525.197	443.569	455.177	372.117
seedling 2 (pix)	550.649		532.803	384.406	373.276	429.834	326.378	329.538	428.179	394.402	468.236	473.118		392.112	408.359	322.965	371.512	398.576	588.174	482.647	513.723	456.694	504.98	424.848	407.51	385.76	377.591	491.403	482.995	425.184	481.957	396.468	408.586	597.391	633.797	658.116	416.34		768.017	626.876	433.78	512.708	423.869	451.326	495.545	509.774	344.631	338.031	374.847
seedling 3 (pix)	385.142	474.507	389.936	408.658	466.91	415.326	455.317		401.67	496.62	363.546	450.652	348.109		418.598	559.423		443.565	521.76	430.407	460.346	400.125	406.163	535.838	439.249	347.108	336.195	490.105	448.203	393.423	491.39	345.763	369.683	657.213	562.099	657.893			581.919	465.739	408.2	414.987	588.843	429.207	559.6	412.938	373.725	461.016	403.735
seedling 4 (pix)	484.451	393.27	357.033		441.144	419.09	366.021	470.463	453.777	442.849	413.43	482.844	305.773	323.431	469.324	466.048	547.213	426.207	536.069	395.04	537.816	628.747	472.13	448.808	330.131	376.273	395.701	525.81	465.139	409.255	465.715	301.608	232.303	637.35	547.868	626.257			770.216	410.621	444.661	541.775	540.075	371.274	559.583	390.047	398.444	434.902	376.835
seedling 5 (pix)	485.642	377.472	407.388	360.527	424.564	622.586	365.803	367.831	415.969	385.619	505.558	476.41			439.065	582.099	467.781	398.095		455.401	473.733		433.5	424.412		426.992	400.043	455.416	464.651	434.447	491.093	356.726	375.996	706.875	578.516	760.406	687.114	708.402	801.081	396.78	393.04	584.29	428.437	375.141	477.842	445.416	377.134	433.356	456.497
seedling 6 (pix)	554.72	479.196	280.091	419.994	506.149	385.45	392.347	426.729	431.72	382.209	502.986	415.283	301.685	351.336		526.828	490.007	325.408	425.398	524.142	456.017	420.572	502.106	403.95	446.342	411.876	401.797	530.397	474.377	399.142	457.024	412.765	354.11	630.666	641.15	712.276	723.98	744.025	735.949	462.569	361.241	596.1	475.972	369.396	415.456	429.262	421.037	378.89	370.001
seedling 7 (pix)	499.885	436.732	426.338	339.76	410.073	422.623	444.725	543.905	434.474	382.625	533.482	435.986	530.218	485.041	429.164	542.058	400.453	380.856	530.668	542.481	388.493	467.164	418.33	454.077	424.445	367.094	447.919	431.538	449.798	491.75	371.308	306.455	349.573	728.192	570.333	748.709	733.047	729.48	768.841	434.24	474.704	454.404	612.097	448.736	464.364	408.893	530.837	415.243	340.818
seedling 8 (pix)	376.047	404.108	461.389	392.898	404.994	313.929	444.833	543.889	454.88	364.877	486.986	518.374	383.588	444.069	449.598	496.492	368.12	360.629	477.206	519.595	379.982	415.003	482.497	528.704	409.885	418.221	378.737	334.367	460.531	423.528	470.074	286.34	303.07	655.867	635.186	756.108	697.715	815.895	831.094	440.431	477.326	500.467	461.19	419.826	603.303	445.365	477.28	405.644	462.211
seedling 9 (pix)	398.473	384.121	496.938	366.385	365.758	383.81	451.396	601.422	535.953	379.61	478.621	458.139	467.388	429.771	395.375	462.665	362.63	375.377	557.962	539.517	471.949	432.403		506.873	358.604	448.961	376.761	475.113	459.169	475.513	448.185	347.595	374.219	659.407	549.869	821.06	718.613	744.192	608.934	407.422	431.529	639.757	470.02	418.822	571.389	407.404	364.555	515.153	354.952
seedling 10 (pix)	438.711	448.457	488.343	409.132	388.724	390.432	439.465	346.668	493.832	440.162	579.206	506.352	545.633	343.095	412.077	455.401	431.974	323.235	566.312	432.674	517.152	374.85	466.083		390.099	399.199	404.752	460.908	470.463	381.845	378.592	284.116	505.05	641.95	581.499	797.405	878.485	890.544	695.933	494.483	487.616	568.227	547.965	470.545	465.766	371.895	499.508		416.431
seedling 11 (pix)	391.641	420.523	462.798	523.86	485.079	399.749	433.397	506.76	438.24	418.486	456.281	487.979	427.575	387.95	517.81	545.797	387.532	446.883	512.063	444.304	466.765	384.908	454.312		317.588	388.014	344.747	465.765	489.253	478.338	479.807	301.404	348.159	656.871	541.322	773.838	721.16	830.222	631.574	416.243	482.779	473.622	553.67	440.178	521.32	552.941	413.807	594.77	351.041
seedling 12 (pix)	404.336	427.112	469.848	451.843	425.353	512.226	412.13	538.901	474.832	473.529	488.12	498.613	519.41	486.156	455.008	591.14	409.021	444.486	488.053	646.178	452.433		556.272	496.649	400.081	360.304	350.941	459.351	505.558	458.882	469.847	270.363	379.746	644.108	637.272	847.313	684.121	969.891	549.188	343.898	604.357	496.987	529.009	332.48	451.766	529.963	440.17	476.54	417.035
seedling 13 (pix)	388.137																																	634.012	717.201		683.963	599.813	696.187		471.872	483.944		473.92	398.723	404.775
seedling 14 (pix)	417.72																																	742.146	606.136		693.427	597.524	704.542		396.92	498.953		570.953	508.867	422.865
seedling 15 (pix)	404.914	447.955																																714.473	690.354		705.255	710.919	724.245		520.883	540.222		469.551	457.214	531.549
seedling 16 (pix)	411.307	473.411																																654.503	590.572		673.045	752.097	780.53		613.946	533.85		548.919	447.639	420.198
seedling 17 (pix)	487.275	435.421																																							510.401	477.078		467.549	427.039	414.365
seedling 18 (pix)	412.723	400.322																																							384.321	536.161		395.892	452.906	401.208
seedling 19 (pix)	340.773																																								496.893	502.224		435.695	320.896	700.714
seedling 20 (pix)		350.482																																							410.386	524.042		359.907	476.917	478.468
seedling 21 (pix)		379.371																																							490.464	453.588		501.246	422.453	496.818
seedling 22 (pix)		367.283																																							461.949	476.464		451.769	442.303	476.512
seedling 23 (pix)		357.954																																							493.262	450.535		463.891	459.092	461.14
seedling 24 (pix)		409.781																																							429.35	419.193		523.136	439.868	501.601
	20 nM IAA
line	Col-0 a	tir1-1 a	afb1-3	afb2-3	afb3-4	afb4-8	afb5-5	afb12*	afb13	afb14	afb15	afb23	afb2-1 3-1	afb24	afb25	afb34	afb35	afb45	afb124	afb125*	afb134	afb135	afb145	afb234	afb235	afb245	afb345	afb1234	afb1235*	afb1245	afb1345	afb2345	afb12345	Col-0 c	tir1-1 c	afb12	afb123	afb125	tir1afb12	Col-0 b	tir1-1 b	tir1-10	tir1afb1	tir1afb2	tir1afb2-1	tir1afb3	tir1afb3-1	tir1afb4	tir1afb5
average (mm)	10.583	13.9487	9.59357	13.1032	10.5756	9.46153	12.2429	12.8976	11.2221	9.42283	12.5077	16.7443	14.3771	12.5201	14.1468	12.5981	12.8393	10.2634	15.9945	15.2674	13.5007	12.8096	12.8016	15.4956	13.7701	12.1744	10.1499	17.0421	16.8846	14.8026	13.9759	11.7531	12.6224	18.4364	19.4015	24.032	25.2901	23.6473	27.922
SE (mm)	1.81493	2.01038	1.98257	2.15195	5.46888	3.15304	2.06263	1.94858	3.07892	2.17007	1.38577	3.67892	2.46315	1.56604	2.06536	3.46411	1.22681	2.04039	1.54915	2.68287	0.925625	1.92742	1.92597	1.57927	2.38636	2.96428	1.2769	2.39974	1.79254	1.72284	1.82933	1.26169	1.02727	2.71823	2.41096	2.17977	2.82686	3.22047	2.25903
		5.10636e-07	0.200309	0.00271561	0.99694	0.368367	0.030593
n	21	24	10	12	9	8	12	12	11	11	11	12	11	12	11	11	11	12	12	12	12	12	12	10	10	7	11	12	12	11	12	12	12	14	16	14	16	16	16
seedling 1 (pix)	242.05	342.35	292.084	342.16	340.971	250.39	255.207	306.731	253.103	217.16	247.459	370.406	196.355	316.129	317.154	223.864	288.413	254.018	365.854	390.649	282.972	346.883	300.891	400.645	282.471	282.169	197.251	487.517	435.044	362.857	367.188	290.453	343.165	422.57	424.337	587.677	515.533	540.522	694.088
seedling 2 (pix)		249.959	288.53	324.12	377.18	271.328	211.223	360.145	232.425	233.432		499.633	309.288	249.308		228.174	253.776	185.498	384.508	442.531	315.489	301.094	351.965		377.132	298.782	210.722	356.753	356.863	355.687	299.485	243.586	321.464	511.129	427.809	617.063	521.669	382.971	690.075
seedling 3 (pix)	338.638	310.174	242.031	337.677	306.888	259.466	262.878	275.49	220.83	225.322	276.013	375.997	346.689	255.046	348.543	354.063	286.623	228.69	463.088	455.817	349.052	302.722	354.714	390.287	328.54	346.457	291.236	339.566	378.002	402.879	327.343	302.837	305.682	427.547	494.81	585.721	589.826	506.802	643.053
seedling 4 (pix)	324.849	349.952		397.542	378.828	246.493	354.446	338.646	143.57	290.147	258.182	460.897	376.709	272.956	303.793	290.423		182.404	338.291	397.422	328.265	324.131	315.574	352.949	349.537	327.487		446.037	432.793	387.679	312.432	296.64	297.428	390.774	571.988	555.794	576.053	435.325	689.176
seedling 5 (pix)	210.959	358.834		357.516	267.541	237.139	253.753	281.179	195.415	209.097	252.188	337.591	389.941	309.832	466.636	321.779	310.151	169.492	363.131	427.486	336.329	363.01	265.905	373.116	313.047	324.653	278.9	362.793	445.104	320.85	302.723	225.558	284.939	498.839	444.866	531.369	616.164	536.788	675.071
seedling 6 (pix)	251.383	384.306	195.386	284.416	324.957	292.931	307.601	263.074		232.81	286.063	286.074	303.756	243.825	346.496	363.906	353.186	209.579	404.332	353.704	322.582	379.715	358.952	400.085		296.774	242.951	426.431	492.664	349.887	298.391	283.269	298.56	440.67	569.99	600.542	644.206	616.598	717.441
seedling 7 (pix)	169.04	330.687	259.151	332.789	82.075	62.669	300.887	301.238	244.08	244.447	306.59	395.611	316.968	267.333	317.296		287.585	286.265	353.519	358.514	288.665	282.746	254.538	292.499	415.429		201.516	482.81	376.296	311.061	388.634	309.798	273.132	546.794	493.11	599.69	643.073	650.019	712.082
seedling 8 (pix)	215.378	322.759	214.367	303.431	67.22	167.589	283.912	294.103	313.981	232.667	336.386	444.996	359.206	356.161	345.792	364.162	295.941	238.461	356.329	321.76	313.082	264.652	269.452	403.306	332.905		233.251	379.325	379.343	381.515	408.531	276.631	287.626	526.187	460.702	589.494	700.059	614.394	682.333
seedling 9 (pix)	192.126	314.474	224.535	308.324	102.705		329.369	325.51	278.229	274.499	319.543	391.134	373.062	323.166	321.985	375.786	324.073	273.716	400.16	320.554	311.611	314.646	289.231	318.219	298.205	136.762	249.8	389.959	358.49		277.439	269.68	280.391	442.454	444.006	570.843	715.647	559.523	663.958
seedling 10 (pix)	177.191	292.335	135.466	256.654			314.172	202.121	296.159		314.956	538.379	353.829	335.635	276.876	206.369	283.105	321.693	350.858	320.996	324.913	231.333	319.028	352.98	348.082		247.74	338.42	373.14	307.668	348.862	293.319	297.585	403.374	460.467	611.839	499.179	586.055	698.282
seedling 11 (pix)		411.546	198.914	210.942			368.347	350.849	416.543	90.666	323.224	418.185		320.193	307.016	153.425	345.077	278.435	341.466	258.791	354.154	252.855	335.35	376.284	207.42		258.978	352.991	369.924	389.835	354.137	310.172	258.034	382.328	475.149	609.287	537.893	602.672	584.976
seedling 12 (pix)	258.029	440.345	215.733	258.736			228.645	356.915	321.641	198.204	329.418	227.516	409.967	299.414	324.353	391.567	308.255	281.057	412.325	279.539	299.869	267.292	213.199				225.023	468.224	388.522	276.433	276.506	229.637	329.992		377.704	569.624	619.552	589.267	661.549
seedling 13 (pix)	275.969	388.943																																413.347	445.69		521.021	599.771	636.954
seedling 14 (pix)	290.048	300.108																																359.851	360.576		582.948	575.702	685.236
seedling 15 (pix)	289.058	313.879																																	417.049	452.861	667.788	661.501	605.727
seedling 16 (pix)	246.626	352.854																																331.206	464.59	465.777	607.847	479.649	513.206
seedling 17 (pix)	225.618	284.015
seedling 18 (pix)	249.164	280.742
seedling 19 (pix)		308.353
seedling 20 (pix)	276.925	300.786
seedling 21 (pix)	255.276	337.806
seedling 22 (pix)	252.423	384.051
seedling 23 (pix)	258.672	271.915
seedling 24 (pix)	250.414	276.726
	100 nM IAA
line	Col-0 a	tir1-1 a	afb1-3	afb2-3	afb3-4	afb4-8	afb5-5	afb12*	afb13	afb14	afb15	afb23	afb2-1 3-1	afb24	afb25	afb34	afb35	afb45	afb124	afb125*	afb134	afb135	afb145	afb234	afb235	afb245	afb345	afb1234	afb1235*	afb1245	afb1345	afb2345	afb12345	Col-0 c	tir1-1 c	afb12	afb123	afb125	tir1afb12	Col-0 b	tir1-1 b	tir1-10	tir1afb1	tir1afb2	tir1afb2-1	tir1afb3	tir1afb3-1	tir1afb4	tir1afb5
average (mm)	2.5927	5.05006	1.30113	2.92533	2.96099	2.5233	3.35575	3.85671	3.05006	2.48867	2.26765	4.85588	7.24876	4.63127	4.5718	4.2673	4.73675	4.10817	4.16825	5.54871	4.48186	5.41126	5.01507	8.49286	7.69437	5.59853	4.22184	6.52405	8.10677	5.69944	4.50032	5.39943	5.77786	5.90141	10.2759	8.84805	11.5251	10.8636	19.6552	3.67102	6.18565	7.55629	7.02824	11.3163	13.1906	7.62421	9.15259	7.30357	8.69879
SE (mm)	1.44191	2.78372	0.777432	1.55336	1.43072	1.00212	1.39481	1.90575	1.19335	1.20976	0.822148	1.05431	1.38627	1.7021	1.55331	1.4817	1.66292	1.66387	1.56333	1.46276	2.14622	2.58953	2.8082	3.32672	1.8122	1.16317	0.839581	1.46899	1.02719	1.35598	1.30146	0.652699	1.60698	2.80742	2.58068	2.2358	3.32919	2.72729	1.98304	1.51062	2.25923	2.60399	1.46285	1.26838	2.13447	1.48111	1.24722	0.792902	1.88686
		0.00138973	0.00202593	0.598105	0.558541	0.807317	0.172241
n	20	21	12	12	10	12	12	11	9	12	8	9	11	11	11	11	12	10	12	12	11	11	12	10	12	12	12	11	12	11	12	12	11	15	16	12	15	16	16	12	19	22	12	23	24	24	12	12	11
seedling 1 (pix)	90.501	36.9	8	59.657	77.898	63.522	102.725	167.155	78.072	39.385	63.2	101.591	197.58	160.746	140.985	74.386	90.989		65.058	139.245	38.28	189.342	174.295	315.615	135.69	114.849	85.929	209.099	175.972	187.969	105.311	117.501	130.523	188.909	215.906	275.007	285.89	310.407	484.11	62.888	68.313	221.565	138.004	247.272	355.539	234.246	205.547	207.936	172.058
seedling 2 (pix)	138.562	36.405	22.519	65.332	67.672	54.096	52.676	61.798	72.913	70.001	77.839	121.242	181.461		175.509		80.646		45.921	141.896	55.06	195.585	139.397	253.23	98.176	113.708	88.639	177.973	212.228	159.261	91.779	100.089	111.981	171.656	173.145	276.044	306.955	380.137	472.369	131.774	208.037		152.993	296.239	374.649	243.278	253.964	202.661	130.597
seedling 3 (pix)	76.78		15.621	64.251	75.173	60.842	130.854	159.862	138.991	26.122	60.797	83.958	220.957	80.851	153.108	92.961	65.498	70.39	86.721	185.255	37.242	169.106	186.706	261.649	207.145	106.883	77.519	157.114	243.616	154.056	116.789	110.271	112.941	210.852	212.832	312.441	295.114	378.509	449.745	122.542			195.211	254.322	403.623	179.558	222.323	165.874	150.157
seedling 4 (pix)	124.985	30.175	18.478	56.791	67.09	67.758	117.137	70.583	82.196	39.869	33.327	146.507	204.814	172.656	134.955	87.453	83.486	44.739	161.765	149.571	92.114		191.793	247.4	153.957	87.633	85.779	124.664	170.6		63.477	118.094	104.113	168.317	186.409	233.72	317.395	327.315	407.795	128.601		236.795	200.669	274.47	336.853	184.413	211.547	174.665
seedling 5 (pix)		59.183	19.887	69.395	76.714	54.187	127.43	144.902		47.954	57.36	84.376	193.359	155.509		70.083	68.041	58.849	152.156	188.838	56.468	197.113	217.94	253.397	174.735	135.906	89.489	216.229	183.237	174.41	71.179	119.95	65.194	196.156	329.973	172.175	396.639	260.915	415.53	132.691		209.64	217.057	323.327	369.655	191.245	245.926	178.273	192.994
seedling 6 (pix)		45.214	22.782	68.648	64.555	56.716	95.744	98.695		78.111	73.583	98.796	187.587	145.951	95.818	42.395	70.581	61.423	97.558	142.793		202.754	162.898	219.31	128.885	106.378	89.529		223.438	152.068	69.535	125.217	118.226		292.692	173.786	352.297	217.191	412.318	113.881		284.018	179.322	273.709	288.819	207.278	226.613	161.788	171.341
seedling 7 (pix)	41.938	106.407	71.265	18.488		5.517	58.106		65.654	26.768	24.814		157.789	79.974	86.98	125.112	135.24	95.31	109.813	86.265	136.06	65.905	54.229	97.074	209.5	157.836	116.062	153.026	188.338	104.943	131.944	134.968	166.493	215.296	290.33	173.218	378.498	219.675	473.905	61.201	91.854	140.707	116.411	234.35	373.617	152.965	206.006	154.075	224.279
seedling 8 (pix)	37.753	136.915	55.962	52.315	80.965	91.499	48.592	68.815	45.215	90.107			132.892	64.396	96.643	158.172	147.263	159.358	61.88	88.405	149.977	77.491	43.128		208.81	148.801	122.163	144.988	197.641	122.763	77.18	128.634		271.171	311.686	154.561	340.642	156.654	387.172	44.432	156.019	152.165	171.463	251.28	320.717	156.974	193.088	176.285	239.803
seedling 9 (pix)	46	127.494	26.236	23.84	25.568	27.821	62.169	51.863	46.565	104.407		110.181	144.387	77.847	66.891	104.201	135.368	84.194	82.304	95.947	138.205	66.671	67.559		220.908	158.089	132.417	148.985	179.391	118.45	132.98	139.494	180.49	100.51	273.862	165.27	244.755	199.641	516.847	63.038	150.406	158.093	100.931	216.237	313.041	238.132	140.421	146.193	269.831
seedling 10 (pix)	55.385	63.24	41.679	159.887	144.052	80.818	53.808	52.255	61.196	101.292			134.142	93.332	81.139	109.298	140.93	131.625	100.742	138.725	167.789	78.799	71.85	126.729	230.458	171.683	129.191	106.42	157.189	111.134	123.844	136.499	159.238	83.367	262.273	200.373	221.841	209.427	501.369	45.123	92.194	96.353	190.14	299.308	342.248	150.258	227.114	172.103	226.052
seedling 11 (pix)	37.418	120.676	24.994	98.75		81.536	56.916	77.405	57.635	37.706		140.322		83.099	85.737	154.481	143.716	131.995	141.589	105.913	138.2	90.262	72.498	116.086	215.517	120.528	100.525	129.488	188.355	94.986	147.399	153.744	187.631	96.641	314.798	203.255	248.084	217.522	549.211	71.046	126.399	122.083	160.847	254.001	320.315	150.976	234.323	178.359	236.387
seedling 12 (pix)	61.788	93.674	41.402	91.874	19.76	70.954	45.08	48.805		43.728	37.612	145.38	128.569	89.04	70.183	90.284	180.943	132.55	76.043	110.01	155.183	73.047	39.303	115.697	197.301	164.69	79.499	127.24	177.976	100.916	144.265	146.085	164.505	89.793	312.752	168.258	212.12	205.5	450.775	63.388	116.438	151.108	169.208	339.588	296.019	164.427	227.564	152.091	246.816
seedling 13 (pix)	29.607																																	69.149	174.967		160.645	225.829	515.835		112.163	236.424		231.163	271.421	176.075
seedling 14 (pix)	53.075	96.907																																75.899	181.682			265.415	468.736		214.538	233.031		220.262	262.374	170.915
seedling 15 (pix)	27.821	102.819																																79.235	167.732		172.96	281.844	504.586		245.073	257.255		271.308	285.004	198.672
seedling 16 (pix)	52.326	95.514																																74.1	182.761		149.872	249.949	418.427		204.109	156.929		269.804	269.482	164.484
seedling 17 (pix)	62.024	104.247																																							247.786	244.892			207.241	103.476
seedling 18 (pix)	43.955																																								120.737	284.324		271.847	273.077	157.806
seedling 19 (pix)	46.739	202.9																																							146.817	141.135		272.193	259.845	192.208
seedling 20 (pix)	42.189	252.246																																							93.324	123.617		270.206	405.728	168.604
seedling 21 (pix)		203.516																																							131.341	142		267.939	310.256	184.232
seedling 22 (pix)		200.145																																							113.086	138.728		261.015	288.91	210.857
seedling 23 (pix)	135.372	198.662																																							137.601	98.038		296.614	293.957	119.43
seedling 24 (pix)	38.259	191.909																																								97.993		251.767	255.735	221.879
	500 nM IAA
line	Col-0 a	tir1-1 a	afb1-3	afb2-3	afb3-4	afb4-8	afb5-5	afb12*	afb13	afb14	afb15	afb23	afb2-1 3-1	afb24	afb25	afb34	afb35	afb45	afb124	afb125*	afb134	afb135	afb145	afb234	afb235	afb245	afb345	afb1234	afb1235*	afb1245	afb1345	afb2345	afb12345	Col-0 c	tir1-1 c	afb12	afb123	afb125	tir1afb12	Col-0 b	tir1-1 b	tir1-10	tir1afb1	tir1afb2	tir1afb2-1	tir1afb3	tir1afb3-1	tir1afb4	tir1afb5
average (mm)																																		1.47727	3.0468	2.16156	3.36139	3.34435	6.03341	1.33443	1.90316	2.08695	2.46526	3.71557	4.30351	2.81826	2.71649	2.02262	2.48706
SE (mm)																																		0.335085	1.70145	0.589205	2.21519	0.820992	2.86167	0.275733	0.464653	0.438498	0.448479	1.3602	1.48769	1.08192	0.94653	0.548657	0.533351
n																																		16	16	14	15	15	16	12	23	23	12	24	24	23	12	12	12
seedling 1 (pix)																																		29.531	31.545	50.914	22.153	121.814	99.163	37.111	48.358	58.142	62.311	77.492	99.807	92.071	73.695	44.429	53.468
seedling 2 (pix)																																		39.74	50.282	44.341	53.323	103.608	107.58	39.45	49.515	51.958	60.759	89.175	106.675	93.008	75.828	68.751	55.765
seedling 3 (pix)																																		32	51.734	43.307	78.764	91.784	102.586	34.244	49.489	73.04	60.306	60.817	101.881	106.065	92.302	62.434	51.644
seedling 4 (pix)																																		32.919	35.453	45.216	71.775	72.022	100.967	36.03	61.869	61.799	48.302	88.38	88.013	85.484	109.91	68.587	42.9
seedling 5 (pix)																																		43.117	153.608	45.286	154.572	62.029	114.793	36.233	65.319	65.569	43.723	59.806	106.011	85.102	45.666	54.009	36.387
seedling 6 (pix)																																		31.261	103.16	76.5	36.115	69.725	127.111	33.934	74.933	41.238	40.459	65.406	81.508	97.06	77.613	43.757	48.183
seedling 7 (pix)																																		55.948	64.318	44.356	197.431	65.249	107.095	29.294	35.259	39.123	64.956	109.345	70.822	39.788	69.165	43.618	63.428
seedling 8 (pix)																																		36.538	54.178	23.227	176.004	74.078	84.33	27.594	56.166	37.092	63.265	113.923	135.673	31.441	43.672	39.149	73.508
seedling 9 (pix)																																		44	123.265	49.217	58.917	69.575	293.241	33.64	46.301	36.272	75.168	112.984	125.177	52.604	44.749	35.297	66.341
seedling 10 (pix)																																		35.982	117.834	46.233	58.328	52.553	295.986	24.955	44.187	44.875	58.375	110.559	101.529	50.19	48.797	30.635	69.198
seedling 11 (pix)																																		28.445	124.358	62.084	59.873	99.317	104.61	15.826		51.562	50.258	116.142	92.102	38.588	47.392	35.446	76.185
seedling 12 (pix)																																		31.176	82.649	51.263	55.544		71.821	29.953	34.947	40.578	70.931	121.949	92.499	52.762	41.241	47.228	67.986
seedling 13 (pix)																																		33.728	37.405		62.918	55.861	181.04		44.139	53.139		51.554	58.614	42.074
seedling 14 (pix)																																		30.623	21			95.216	187.245		35.828	62.151		41.354	44.419	40.451
seedling 15 (pix)																																		21.472	55.49	77.78	49.952	73.737	159.413		37.415	49.109		49.561	61.659	51.61
seedling 16 (pix)																																		31.857	45.267	55.124	55.374	78.437	143.363		29.938	47		55.372	72.908	52.886
seedling 17 (pix)																																									43.727	43.918		61.621	66.499
seedling 18 (pix)																																									36.7	47.093		43.302	59.191	32.835
seedling 19 (pix)																																									44.908			131.816	125.413	62.688
seedling 20 (pix)																																									40.9	46.07		132.01	120.494	73.741
seedling 21 (pix)																																									33.357	37.521		50.511	165.831	113.842
seedling 22 (pix)																																									40.483	63.773		113.53	144.435	99.257
seedling 23 (pix)																																									36.793	41.949		123.698	179.539	79.551
seedling 24 (pix)																																									43.467	40.882		126.159	139.084	58.083
line	Col-0 a	tir1-1 a	afb1-3	afb2-3	afb3-4	afb4-8	afb5-5	afb12*	afb13	afb14	afb15	afb23	afb2-1 3-1	afb24	afb25	afb34	afb35	afb45	afb124	afb125*	afb134	afb135	afb145	afb234	afb235	afb245	afb345	afb1234	afb1235*	afb1245	afb1345	afb2345	afb12345	Col-0 c	tir1-1 c	afb12	afb123	afb125	tir1afb12	Col-0 b	tir1-1 b	tir1-10	tir1afb1	tir1afb2	tir1afb2-1	tir1afb3	tir1afb3-1	tir1afb4	tir1afb5
no IAA/no IAA	1	1	1	1	1	1	1	1	1	1	1	1	1	1	1	1	1	1	1	1	1	1	1	1	1	1	1	1	1	1	1	1	1	1	1	1	1	1	1	1	1	1	1	1	1	1	1	1	1
20 nM/no IAA	0.576103	0.787276	0.518854	0.753685	0.578	0.525151	0.697765	0.6758	0.589063	0.535522	0.608724	0.828897	0.798181	0.737438	0.757209	0.602051	0.717266	0.613136	0.724971	0.732013	0.680879	0.689058	0.643662	0.786748	0.802738	0.738347	0.623054	0.84855	0.851322	0.807947	0.727951	0.829352	0.817512	0.659156	0.759538	0.774399	0.882699	0.737179	0.926918
100 nM/no IAA	0.141138	0.28503	0.0703699	0.168262	0.16183	0.140053	0.191255	0.202082	0.160102	0.141437	0.110362	0.240382	0.402435	0.272784	0.244706	0.20393	0.264619	0.245422	0.188931	0.26604	0.226032	0.291083	0.252157	0.431203	0.448551	0.339538	0.259159	0.324842	0.408743	0.311083	0.234405	0.381009	0.374214	0.210993	0.402285	0.285117	0.402261	0.338661	0.652486	0.19538	0.316879	0.352398	0.325989	0.60248	0.657993	0.390895	0.509082	0.393268	0.522688
500 nM/no IAA																																		0.0528168	0.119277	0.0696536	0.117322	0.104256	0.200289	0.0710213	0.097495	0.0973276	0.114345	0.197817	0.214674	0.144493	0.151096	0.10891	0.149441
no IAA SE/ctl	0.0314316	0.0232589	0.0458548	0.0385338	0.0315494	0.051899	0.0293791	0.0709323	0.0235492	0.0287253	0.0344803	0.0198271	0.0750336	0.045677	0.0236363	0.0475447	0.041171	0.0318706	0.0262204	0.0398349	0.029449	0.0522664	0.0273779	0.0324707	0.0442797	0.0242335	0.0232931	0.0359046	0.0106163	0.0239217	0.0255433	0.0435221	0.0501533	0.0156467	0.0213767	0.0291762	0.0447421	0.0410502	0.0285428	0.0450132	0.0281793	0.0220871	0.0347494	0.0269922	0.0268564	0.0314911	0.0391575	0.0495437	0.0317289
20 nM SE/ctl	0.0281552	0.0295255	0.0414218	0.0460457	0.101287	0.0676106	0.0396466	0.0562724	0.0506653	0.0402417	0.029224	0.0550819	0.0727109	0.0429376	0.0378328	0.0575394	0.0360426	0.0402494	0.0277888	0.047214	0.0241589	0.0468279	0.0330453	0.0359937	0.0565575	0.0702656	0.0277337	0.0460215	0.0276115	0.0343135	0.0332011	0.0443103	0.0452766	0.0279465	0.0286427	0.0293751	0.0465638	0.0393153	0.0324261
100 nM SE/ctl	0.0181034	0.0349206	0.0125593	0.0265949	0.0252489	0.0176252	0.023626	0.033346	0.0212179	0.020259	0.0146494	0.0180383	0.0380826	0.0326951	0.0257265	0.0234483	0.0289461	0.0323915	0.0210468	0.0228518	0.0333074	0.04467	0.0413403	0.0552173	0.0363942	0.0219636	0.0160558	0.0249478	0.0155678	0.0235234	0.0204642	0.0212543	0.0365651	0.0261258	0.0266812	0.0223997	0.0349867	0.0253978	0.0248535	0.0248195	0.0280129	0.0270359	0.0226267	0.0215111	0.0280116	0.0197938	0.0282564	0.0230549	0.0379948
500 nM SE/ctl																																		0.003107	0.0168464	0.00546614	0.0206416	0.00787304	0.0244279	0.00530723	0.00567296	0.00477533	0.00720052	0.0157168	0.0162084	0.0124292	0.0163091	0.0100919	0.0103957
no IAA SE of ratio	0.0444509	0.0328931	0.0648485	0.0544951	0.0446176	0.0733963	0.0415483	0.100313	0.0333036	0.0406238	0.0487625	0.0280397	0.106114	0.064597	0.0334268	0.0672384	0.0582246	0.0450719	0.0370812	0.056335	0.0416472	0.0739158	0.0387181	0.0459205	0.062621	0.0342713	0.0329414	0.0507768	0.0150138	0.0338304	0.0361237	0.0615495	0.0709275	0.0221277	0.0302312	0.0412614	0.0632748	0.0580537	0.0403655	0.0636583	0.0398515	0.0312358	0.049143	0.0381727	0.0379807	0.0445351	0.0553771	0.0700654	0.0448715
20 nM SE of ratio	0.0281552	0.0295255	0.0414218	0.0460457	0.101287	0.0676106	0.0396466	0.0562724	0.0506653	0.0402417	0.029224	0.0550819	0.0727109	0.0429376	0.0378328	0.0575394	0.0360426	0.0402494	0.0277888	0.047214	0.0241589	0.0468279	0.0330453	0.0359937	0.0565575	0.0702656	0.0277337	0.0460215	0.0276115	0.0343135	0.0332011	0.0443103	0.0452766	0.0279465	0.0286427	0.0293751	0.0465638	0.0393153	0.0324261
100 nM SE of ratio	0.0181034	0.0349206	0.0125593	0.0265949	0.0252489	0.0176252	0.023626	0.033346	0.0212179	0.020259	0.0146494	0.0180383	0.0380826	0.0326951	0.0257265	0.0234483	0.0289461	0.0323915	0.0210468	0.0228518	0.0333074	0.04467	0.0413403	0.0552173	0.0363942	0.0219636	0.0160558	0.0249478	0.0155678	0.0235234	0.0204642	0.0212543	0.0365651	0.0261258	0.0266812	0.0223997	0.0349867	0.0253978	0.0248535	0.0248195	0.0280129	0.0270359	0.0226267	0.0215111	0.0280116	0.0197938	0.0282564	0.0230549	0.0379948
500 nM SE of ratio																																		0.003107	0.0168464	0.00546614	0.0206416	0.00787304	0.0244279	0.00530723	0.00567296	0.00477533	0.00720052	0.0157168	0.0162084	0.0124292	0.0163091	0.0100919	0.0103957
	20 nM IAA/ctl
line	Col-0 a	tir1-1 a	afb1-3	afb2-3	afb3-4	afb4-8	afb5-5	afb12*	afb13	afb14	afb15	afb23	afb2-1 3-1	afb24	afb25	afb34	afb35	afb45	afb124	afb125*	afb134	afb135	afb145	afb234	afb235	afb245	afb345	afb1234	afb1235*	afb1245	afb1345	afb2345	afb12345	Col-0 c	tir1-1 c	afb12	afb123	afb125	tir1afb12	Col-0 b	tir1-1 b	tir1-10	tir1afb1	tir1afb2	tir1afb2-1	tir1afb3	tir1afb3-1	tir1afb4	tir1afb5
average (%)	0.576103	0.787276	0.518854	0.753685	0.578	0.525151	0.697765	0.6758	0.589063	0.535522	0.608724	0.828897	0.798181	0.737438	0.757209	0.602051	0.717266	0.613136	0.724971	0.732013	0.680879	0.689058	0.643662	0.786748	0.802738	0.738347	0.623054	0.84855	0.851322	0.807947	0.727951	0.829352	0.817512	0.659156	0.759538	0.774399	0.882699	0.737179	0.926918
n	21	24	10	12	9	8	12	12	11	11	11	12	11	12	11	11	11	12	12	12	12	12	12	10	10	7	11	12	12	11	12	12	12	14	16	14	16	16	16
seedling 1 (%ctl)	0.557801	0.817989	0.668737	0.833149	0.788898	0.588332	0.615742	0.680379	0.562429	0.522466	0.509836	0.776236	0.461483	0.788252	0.718638	0.452893	0.682083	0.642411	0.702007	0.792909	0.60414	0.789922	0.64045	0.861133	0.697099	0.724446	0.512586	1.02761	0.928578	0.838421	0.809643	0.867652	0.940888	0.639579	0.703247	0.801672	0.76173	0.713325	0.975419
seedling 2 (%ctl)		0.597236	0.6606	0.789222	0.872675	0.637529	0.509621	0.79886	0.51648	0.561615		1.04705	0.726904	0.621637		0.461612	0.600168	0.469124	0.7378	0.898215	0.673564	0.685652	0.749162		0.93071	0.767099	0.547592	0.751977	0.761705	0.821854	0.660359	0.727649	0.881389	0.773617	0.709001	0.841758	0.770796	0.505405	0.969779
seedling 3 (%ctl)	0.780386	0.74111	0.554139	0.822233	0.710041	0.609657	0.63425	0.611082	0.490714	0.542103	0.568665	0.787953	0.814806	0.635945	0.789763	0.716295	0.67785	0.578356	0.888581	0.925182	0.74522	0.689359	0.755013	0.83887	0.810791	0.889501	0.75682	0.71575	0.806825	0.930896	0.721786	0.904646	0.838118	0.647112	0.820041	0.799004	0.871502	0.668825	0.903698
seedling 4 (%ctl)	0.74861	0.836153		0.968003	0.876488	0.579175	0.855177	0.751172	0.319032	0.698066	0.531928	0.965872	0.885361	0.680602	0.688364	0.587546		0.461299	0.649118	0.806656	0.70084	0.738111	0.671703	0.758617	0.862609	0.840797		0.940174	0.923774	0.895775	0.688907	0.886134	0.815487	0.591454	0.947946	0.758179	0.851152	0.574497	0.968516
seedling 5 (%ctl)	0.486152	0.857375		0.870541	0.619005	0.557196	0.612234	0.623701	0.434239	0.503067	0.519579	0.707468	0.916459	0.772551	1.05735	0.650982	0.733493	0.428645	0.696782	0.867678	0.718057	0.826647	0.565982	0.801963	0.772557	0.833521	0.724763	0.764709	0.950051	0.741359	0.667499	0.673796	0.781244	0.755015	0.737269	0.72486	0.910418	0.708397	0.948694
seedling 6 (%ctl)	0.579308	0.918236	0.447343	0.692544	0.751847	0.688289	0.742154	0.583541		0.560119	0.589371	0.599507	0.713903	0.607966	0.785124	0.736208	0.835269	0.530025	0.775839	0.717921	0.688707	0.864687	0.764034	0.859929		0.761943	0.631344	0.898847	1.05157	0.808453	0.657947	0.846192	0.81859	0.666974	0.944635	0.819222	0.951852	0.813722	1.00824
seedling 7 (%ctl)	0.38955	0.790122	0.593336	0.810331	0.189895	0.147251	0.725955	0.668195	0.542379	0.588116	0.631662	0.829057	0.744954	0.666582	0.71896		0.680125	0.723963	0.678338	0.727684	0.616295	0.643869	0.541787	0.628688	1.02522		0.523669	1.01769	0.803184	0.718741	0.856931	0.925441	0.748872	0.827597	0.817223	0.818059	0.950178	0.857827	1.00071
seedling 8 (%ctl)	0.496335	0.771179	0.490801	0.738845	0.155526	0.393777	0.684999	0.652368	0.697708	0.559774	0.69305	0.93255	0.844224	0.88807	0.783529	0.736725	0.699887	0.603067	0.68373	0.653084	0.668425	0.602666	0.573532	0.866853	0.821564		0.606137	0.799556	0.809688	0.881533	0.900804	0.826363	0.788612	0.796408	0.763514	0.804151	1.03438	0.810813	0.958899
seedling 9 (%ctl)	0.442751	0.751384	0.514081	0.75076	0.237627		0.794674	0.722034	0.618262	0.660418	0.658349	0.819674	0.876789	0.805798	0.729585	0.760242	0.766418	0.692227	0.767834	0.650636	0.665284	0.716512	0.615632	0.683969	0.735929	0.351125	0.649142	0.82197	0.765178		0.611748	0.805598	0.768775	0.669674	0.735844	0.778708	1.05741	0.7384	0.933077
seedling 10 (%ctl)	0.408334	0.698486	0.310154	0.624945			0.758008	0.448337	0.658105		0.648898	1.12825	0.831587	0.836889	0.627373	0.417499	0.66953	0.813561	0.673232	0.651533	0.693684	0.526792	0.679055	0.758683	0.859018		0.643789	0.713334	0.796448	0.710901	0.769235	0.876214	0.815917	0.610525	0.763125	0.834632	0.737566	0.773414	0.981313
seedling 11 (%ctl)		0.983321	0.455421	0.513637			0.888717	0.77824	0.925615	0.218134	0.665933	0.876363		0.798385	0.695667	0.31039	0.816091	0.704161	0.655211	0.525274	0.756113	0.575802	0.713797	0.808772	0.511884		0.672993	0.744048	0.789583	0.900757	0.780866	0.926558	0.707476	0.578671	0.787457	0.831151	0.794768	0.795344	0.822081
seedling 12 (%ctl)	0.594624	1.05213	0.493929	0.630014			0.551655	0.791696	0.71473	0.47686	0.678694	0.476791	0.963525	0.746574	0.734951	0.792168	0.729009	0.710792	0.791176	0.567387	0.640215	0.608678	0.453797				0.584756	0.98694	0.82928	0.638729	0.609691	0.68598	0.904771		0.625963	0.777045	0.915424	0.777653	0.929691
seedling 13 (%ctl)	0.635966	0.929315																																0.625619	0.738635		0.769839	0.791515	0.895127
seedling 14 (%ctl)	0.668411	0.717059																																0.544651	0.597577		0.86134	0.759752	0.962979
seedling 15 (%ctl)	0.66613	0.749962																																	0.691169	0.617764	0.986696	0.87298	0.851243
seedling 16 (%ctl)	0.568346	0.843087																																0.501295	0.769958	0.635384	0.898129	0.632991	0.721221
seedling 17 (%ctl)	0.519933	0.678607
seedling 18 (%ctl)	0.574195	0.670787
seedling 19 (%ctl)		0.736759
seedling 20 (%ctl)	0.63817	0.718679
seedling 21 (%ctl)	0.58828	0.807132
seedling 22 (%ctl)	0.581705	0.917627
seedling 23 (%ctl)	0.596106	0.649696
seedling 24 (%ctl)	0.577075	0.661191
	100 nM IAA/ctl
line	Col-0 a	tir1-1 a	afb1-3	afb2-3	afb3-4	afb4-8	afb5-5	afb12*	afb13	afb14	afb15	afb23	afb2-1 3-1	afb24	afb25	afb34	afb35	afb45	afb124	afb125*	afb134	afb135	afb145	afb234	afb235	afb245	afb345	afb1234	afb1235*	afb1245	afb1345	afb2345	afb12345	Col-0 c	tir1-1 c	afb12	afb123	afb125	tir1afb12	Col-0 b	tir1-1 b	tir1-10	tir1afb1	tir1afb2	tir1afb2-1	tir1afb3	tir1afb3-1	tir1afb4	tir1afb5
average (mm)	0.00597484	0.0120663	0.00297899	0.0071231	0.00685079	0.0059289	0.00809648	0.00855482	0.00677764	0.0059875	0.004672	0.0101762	0.0170364	0.0115478	0.0103592	0.00863305	0.0112022	0.0103895	0.0079981	0.0112623	0.0095687	0.0123225	0.0106746	0.0182543	0.0189886	0.0143738	0.0109711	0.0137516	0.0173035	0.0131692	0.00992313	0.0161294	0.0158417	0.00893205	0.0170301	0.0120699	0.0170291	0.0143367	0.0276219	0.00827108	0.0134145	0.0149182	0.0138002	0.025505	0.027855	0.0165479	0.0215511	0.0166483	0.0221271
n	20	21	12	12	10	12	12	11	9	12	8	9	11	11	11	11	12	10	12	12	11	11	12	10	12	12	12	11	12	11	12	12	11	15	16	12	15	16	16	12	19	22	12	23	24	24	12	12	11
seedling 1 (%ctl)	0.208558	0.0881665	0.0183163	0.145263	0.180231	0.149255	0.247846	0.370777	0.173487	0.0947565	0.13021	0.212898	0.464362	0.400812	0.319458	0.150488	0.215185		0.124834	0.282629	0.0817272	0.43117	0.370989	0.678372	0.334864	0.294866	0.223299	0.440747	0.375603	0.434323	0.232209	0.351004	0.357867	0.285922	0.357818	0.375147	0.422419	0.409643	0.680332	0.141691	0.148147	0.43743	0.270976	0.557309	0.750805	0.508416	0.483991	0.473986	0.437665
seedling 2 (%ctl)	0.319314	0.0869837	0.0515581	0.159081	0.156571	0.127107	0.127092	0.137078	0.162023	0.168416	0.16037	0.254079	0.426479		0.397685		0.190724		0.088114	0.28801	0.117552	0.445386	0.296708	0.544284	0.242285	0.291936	0.230342	0.375138	0.452989	0.36799	0.202371	0.29899	0.307029	0.259809	0.28695	0.376562	0.453544	0.501665	0.663832	0.296896	0.451161		0.300408	0.667672	0.79116	0.52802	0.597996	0.461962	0.3322
seedling 3 (%ctl)	0.176938		0.0357649	0.156449	0.173926	0.142958	0.315713	0.3546	0.308857	0.062847	0.125259	0.175945	0.519304	0.201598	0.346927	0.188067	0.1549	0.178016	0.166402	0.376016	0.079511	0.385088	0.397406	0.56238	0.511205	0.274414	0.201445	0.331171	0.519985	0.355963	0.257518	0.329406	0.309661	0.319134	0.352723	0.426212	0.436048	0.499517	0.632038	0.276096			0.383304	0.573199	0.852346	0.389719	0.523492	0.378106	0.381955
seedling 4 (%ctl)	0.288026	0.0720982	0.0423061	0.138284	0.155225	0.159208	0.282618	0.156565	0.182651	0.095921	0.068663	0.307025	0.481364	0.430509	0.305794	0.176924	0.197441	0.113145	0.310397	0.303588	0.196662		0.408234	0.531753	0.379945	0.224991	0.222909	0.262771	0.364137		0.139966	0.352775	0.285457	0.254755	0.308933	0.318826	0.46897	0.431956	0.573084	0.289747		0.467498	0.394021	0.618609	0.711345	0.400257	0.498119	0.398145
seedling 5 (%ctl)		0.141408	0.045532	0.168975	0.177492	0.127321	0.307452	0.321416		0.115373	0.118178	0.176821	0.454442	0.387754		0.141783	0.160914	0.148829	0.291959	0.383289	0.120558	0.448866	0.463888	0.544643	0.431222	0.348928	0.23255	0.455776	0.39111	0.402994	0.156948	0.358319	0.178749	0.296891	0.546859	0.23487	0.586057	0.344328	0.583955	0.298962		0.413887	0.4262	0.728724	0.780614	0.415085	0.579069	0.40637	0.49092
seedling 6 (%ctl)		0.108031	0.0521602	0.167156	0.14936	0.133263	0.231003	0.218922		0.187928	0.151602	0.20704	0.440876	0.363922	0.217114	0.0857681	0.166921	0.155339	0.187196	0.28983		0.461712	0.34673	0.471378	0.31807	0.273117	0.232654		0.476917	0.35137	0.153323	0.374053	0.324152		0.485074	0.237068	0.520539	0.286626	0.579441	0.256582		0.560729	0.352106	0.616894	0.60991	0.449884	0.533594	0.368793	0.435841
seedling 7 (%ctl)	0.0966455	0.254242	0.163164	0.0450177		0.0129631	0.140193		0.145892	0.0644012	0.0511239		0.370844	0.199411	0.197088	0.25311	0.319836	0.241039	0.210711	0.175094	0.290486	0.150079	0.115427	0.208648	0.517017	0.405231	0.301604	0.322554	0.401997	0.242482	0.290934	0.403182	0.45649	0.32586	0.481159	0.236293	0.559253	0.289904	0.66599	0.13789	0.1992	0.277794	0.228577	0.528185	0.788981	0.332001	0.485071	0.351211	0.570499
seedling 8 (%ctl)	0.0870012	0.327136	0.128127	0.127385	0.187327	0.214992	0.117239	0.152643	0.100474	0.216789			0.312329	0.160568	0.218983	0.319993	0.34827	0.403016	0.118736	0.179438	0.320198	0.176463	0.0917985		0.515314	0.382035	0.317459	0.305611	0.421854	0.283657	0.170181	0.38426		0.410429	0.516552	0.210842	0.503318	0.206736	0.544102	0.100108	0.338351	0.300415	0.336674	0.566342	0.67727	0.340702	0.454654	0.401838	0.609988
seedling 9 (%ctl)	0.106006	0.304626	0.0600683	0.0580497	0.0591562	0.0653699	0.149996	0.115041	0.103474	0.251193		0.230899	0.339346	0.194108	0.151568	0.210806	0.320139	0.212926	0.157926	0.194746	0.295065	0.151823	0.1438		0.54517	0.405881	0.344105	0.314036	0.382901	0.273692	0.293219	0.416702	0.494867	0.152126	0.453867	0.225451	0.36164	0.263465	0.726338	0.142029	0.326179	0.312119	0.198182	0.487361	0.66106	0.516851	0.330642	0.333244	0.68637
seedling 10 (%ctl)	0.127634	0.151102	0.0954256	0.38932	0.333291	0.189895	0.129823	0.11591	0.135986	0.243699			0.315267	0.232719	0.183853	0.221118	0.333293	0.332879	0.193305	0.281573	0.358227	0.179441	0.152934	0.272387	0.568738	0.440782	0.335722	0.224316	0.335512	0.256787	0.273074	0.407755	0.436598	0.12618	0.434661	0.273336	0.327783	0.27638	0.704586	0.101665	0.199937	0.190227	0.373347	0.674589	0.722738	0.326126	0.534773	0.392305	0.575009
seedling 11 (%ctl)	0.0862292	0.288335	0.0572247	0.240453		0.191582	0.137322	0.171697	0.128073	0.090717		0.294064		0.207203	0.194271	0.312526	0.339882	0.333815	0.271683	0.214974	0.295055	0.205545	0.154313	0.249511	0.531866	0.309446	0.261229	0.27294	0.402034	0.219476	0.325012	0.45927	0.514446	0.14627	0.52171	0.277268	0.366559	0.287063	0.77182	0.160072	0.274116	0.241025	0.315829	0.572475	0.676421	0.327684	0.551748	0.406566	0.601298
seedling 12 (%ctl)	0.14239	0.223819	0.0947914	0.22371	0.0457184	0.166718	0.108765	0.108257		0.105205	0.0774914	0.304664	0.302169	0.222017	0.159027	0.182651	0.427922	0.335219	0.145913	0.22329	0.331313	0.166343	0.0836569	0.248675	0.486912	0.422828	0.20659	0.268201	0.37988	0.233178	0.318102	0.436391	0.451039	0.135906	0.518319	0.229527	0.31342	0.271198	0.633485	0.142818	0.252514	0.298329	0.332246	0.765374	0.625114	0.356878	0.535833	0.346688	0.627827
seedling 13 (%ctl)	0.0682289																																	0.10466	0.28997		0.237362	0.298026	0.724916		0.243243	0.466766		0.521002	0.57317	0.38216
seedling 14 (%ctl)	0.122311	0.231543																																0.114877	0.301099			0.350267	0.658726		0.465259	0.460067		0.496433	0.554065	0.37096
seedling 15 (%ctl)	0.0641131	0.245669																																0.119926	0.27798		0.255558	0.371948	0.709107		0.531479	0.507892		0.611482	0.601854	0.431205
seedling 16 (%ctl)	0.120584	0.228215																																0.112154	0.302887		0.221445	0.329857	0.588026		0.442642	0.309821		0.608092	0.569075	0.357002
seedling 17 (%ctl)	0.142933	0.249081																																							0.537362	0.483484			0.437639	0.224588
seedling 18 (%ctl)	0.101294																																								0.261837	0.561333		0.612697	0.576667	0.342508
seedling 19 (%ctl)	0.107709	0.484796																																							0.318395	0.278639		0.613477	0.548724	0.417175
seedling 20 (%ctl)	0.0972239	0.6027																																							0.202388	0.244054		0.608998	0.856791	0.365944
seedling 21 (%ctl)		0.486268																																							0.284833	0.280347		0.603889	0.655179	0.399864
seedling 22 (%ctl)		0.478214																																							0.245245	0.273887		0.588283	0.610102	0.457652
seedling 23 (%ctl)	0.311963	0.47467																																							0.298409	0.193554		0.668517	0.62076	0.259215
seedling 24 (%ctl)	0.0881673	0.458535																																								0.193465		0.56744	0.540045	0.481574
	500 nM IAA/ctl
line	Col-0 a	tir1-1 a	afb1-3	afb2-3	afb3-4	afb4-8	afb5-5	afb12*	afb13	afb14	afb15	afb23	afb2-1 3-1	afb24	afb25	afb34	afb35	afb45	afb124	afb125*	afb134	afb135	afb145	afb234	afb235	afb245	afb345	afb1234	afb1235*	afb1245	afb1345	afb2345	afb12345	Col-0 c	tir1-1 c	afb12	afb123	afb125	tir1afb12	Col-0 b	tir1-1 b	tir1-10	tir1afb1	tir1afb2	tir1afb2-1	tir1afb3	tir1afb3-1	tir1afb4	tir1afb5
average (mm)																																		0.00223591	0.00504941	0.00294867	0.00496665	0.00441352	0.0084789	0.00300657	0.00412729	0.0041202	0.00484063	0.00837427	0.00908788	0.00611686	0.00639639	0.00461051	0.00632634
SE (mm)																																		0.000507166	0.00281979	0.000803756	0.00327307	0.00108346	0.00402158	0.000621245	0.00100767	0.000865714	0.000880607	0.00306565	0.00314161	0.00234824	0.00222875	0.00125065	0.00135669
n																																		16	16	14	15	15	16	12	23	23	12	24	24	23	12	12	12
seedling 1 (%ctl)																																		0.0446965	0.052279	0.0694537	0.0327324	0.160757	0.139356	0.0836137	0.104872	0.114788	0.12235	0.174654	0.210766	0.199834	0.173526	0.101275	0.136007
seedling 2 (%ctl)																																		0.0601483	0.0833315	0.0604872	0.0787878	0.136731	0.151185	0.0888837	0.107381	0.102579	0.119303	0.200985	0.22527	0.201868	0.178548	0.156717	0.14185
seedling 3 (%ctl)																																		0.0484334	0.0857379	0.0590767	0.116378	0.121127	0.144167	0.0771542	0.107325	0.144201	0.118413	0.137071	0.215146	0.230207	0.217339	0.142317	0.131367
seedling 4 (%ctl)																																		0.0498244	0.0587557	0.0616808	0.106052	0.0950471	0.141891	0.0811782	0.134173	0.122008	0.0948428	0.199193	0.18586	0.185538	0.258799	0.156343	0.109125
seedling 5 (%ctl)																																		0.0652595	0.254572	0.0617763	0.228389	0.0818594	0.161321	0.0816355	0.141654	0.129451	0.0858518	0.134793	0.223867	0.184709	0.107527	0.123112	0.0925577
seedling 6 (%ctl)																																		0.0473149	0.170965	0.104356	0.053362	0.0920158	0.178632	0.0764557	0.162504	0.0814151	0.0794428	0.147414	0.172124	0.210663	0.182751	0.0997432	0.122563
seedling 7 (%ctl)																																		0.0846798	0.106593	0.0605077	0.291716	0.0861088	0.150503	0.0660015	0.0764646	0.0772395	0.127544	0.246445	0.149557	0.0863574	0.162859	0.0994264	0.161342
seedling 8 (%ctl)																																		0.0553019	0.0897883	0.0316848	0.260056	0.0977604	0.118511	0.0621713	0.121805	0.0732297	0.124223	0.256763	0.286506	0.0682407	0.102832	0.0892394	0.186983
seedling 9 (%ctl)																																		0.066596	0.204285	0.0671387	0.0870533	0.0918178	0.412099	0.0757933	0.100411	0.0716108	0.147595	0.254647	0.264341	0.114174	0.105368	0.0804588	0.168752
seedling 10 (%ctl)																																		0.0544604	0.195284	0.0630681	0.086183	0.069354	0.415956	0.0562254	0.0958264	0.0885955	0.114622	0.249181	0.214403	0.108934	0.1149	0.0698319	0.176019
seedling 11 (%ctl)																																		0.0430528	0.206097	0.0846911	0.0884659	0.131068	0.147011	0.0356571		0.101797	0.0986835	0.261764	0.194495	0.0837528	0.111591	0.0807984	0.193792
seedling 12 (%ctl)																																		0.0471863	0.136973	0.0699298	0.0820695		0.100932	0.0674862	0.075788	0.0801121	0.139276	0.274852	0.195334	0.114517	0.097108	0.107655	0.172936
seedling 13 (%ctl)																																		0.0510488	0.0619907		0.092965	0.0737195	0.25442		0.0957223	0.104911		0.116194	0.123777	0.091319
seedling 14 (%ctl)																																		0.0463493	0.034803			0.125656	0.26314		0.0776986	0.122703		0.0932049	0.0938013	0.0877964
seedling 15 (%ctl)																																		0.0324988	0.0919627	0.106103	0.073807	0.0973104	0.224027		0.0811402	0.0969546		0.111702	0.130208	0.112016
seedling 16 (%ctl)																																		0.048217	0.0750203	0.0751967	0.0818183	0.103513	0.201472		0.0649252	0.0927909		0.124799	0.153963	0.114786
seedling 17 (%ctl)																																									0.0948288	0.0867061		0.138883	0.140428
seedling 18 (%ctl)																																									0.0795897	0.0929745		0.0975953	0.124996	0.0712663
seedling 19 (%ctl)																																									0.09739			0.297091	0.264839	0.13606
seedling 20 (%ctl)																																									0.088698	0.0909548		0.297528	0.254452	0.16005
seedling 21 (%ctl)																																									0.0723398	0.0740767		0.113843	0.350192	0.247087
seedling 22 (%ctl)																																									0.0877937	0.125905		0.255877	0.305009	0.215431
seedling 23 (%ctl)																																									0.0797913	0.0828188		0.278794	0.379139	0.17266
seedling 24 (%ctl)																																									0.0942649	0.0807122		0.284341	0.293709	0.126066
[truncated: 21 more columns]
