# Supplementary material for: Genetic analysis of the Arabidopsis TIR1/AFB auxin receptors reveals both overlapping and specialized functions
Source: eLife journal article supplement (doi:10.7554/elife.54740), 2020-02-17
Supplement: supp [file elife_poa_e54740_Figure_1_figure_supplement_5_source_data_1.xlsx]

## Sheet: Figure 1—figure supplement 5
Parent ling information							Counts of seedlings with give phenotypes						% of seedlings with give phenotypes						Combined results as averages of families and combined						Values in making graph							Statistical comparisons
Parent ID Geno/Temp - #		Parent Genotype	Background	Notes	Sterilized	Plated	Normal Root	Rootless with hypocotyl	Rootless without hypocotyl	Did not germinate	n		% Normal Root	% Rootless with hypocotyl	% Rootless without hypocotyl	% Did not germinate	% Aberrant		Root	Rootless with hypocotyl	Rootless without hypocotyl	Do not germinate	SE Aberrant		Summary									*G-tests of independence	Fisher's Exact Test*
Col/23-1		Col-0 Ref	Col	Parent grown in 5155 (23°C)	2016-02-14	2016-02-16	51	1	0	0	52	min	0.980769	0.0192308	0	0	0.0192308	Col-0 23°C	0.991094	0.00890605	0	0	0.00517443			Temp	% Normal	% Rootless	% Non-germ	n	min n	tir1afb23 17°C	tir1afb23 20°C	2.5897e-05	3.65786e-05
Col/23-2		Col-0 Ref	Col	Parent grown in 5155 (23°C)	2016-02-14	2016-02-16	62	0	0	0	62	0	1	0	0	0	0	Combined	227	2	0	0			Col-0	17°C	0.995	0	0.005	216	142	tir1afb23 23°C	tir1afb23 20°C	1.41196e-18	1.28764e-20
Col/23-3		Col-0 Ref	Col	Parent grown in 5155 (23°C)	2016-02-14	2016-02-16	60	1	0	0	61	max	0.983607	0.0163934	0	0	0.0163934		0.991266	0.00873362	0	0			Col-0	20°C	0.991	0.009	0	221	max	tir1afb123 17°C	tir1afb123 20°C	2.57588e-17	5.70643e-06
Col/23-4		Col-0 Ref	Col	Parent grown in 5155 (23°C)	2016-02-14	2016-02-16	54	0	0	0	54		1	0	0	0	0								Col-0	23°C	0.991	0.009	0	229	255	tir1afb123 23°C	tir1afb123 20°C	2.98906e-06	5.18059e-17
						Average:	56.75	0.5	0	0	57.25														tir1afb2	20°C	1	0	0	218		tir1afb245 17°C	tir1afb245 20°C	0.225068	0.246311
Col/20-1		Col-0 Ref	Col	Parent grown in 1240B (20°C)	2016-02-03	2016-02-05	53	1	0	0	54		0.981481	0.0185185	0	0	0.0185185	Col-0 20°C	0.990653	0.00934661	0	0	0.00539674		tir1afb23	17°C	0.26	0.713	0.028	194		tir1afb245 23°C	tir1afb245 20°C	2.76228e-05	3.50945e-05
Col/20-2		Col-0 Ref	Col	Parent grown in 1240B (20°C)	2016-02-03	2016-02-05	52	1	0	0	53		0.981132	0.0188679	0	0	0.0188679	Combined	219	2	0	0			tir1afb23	20°C	0.456	0.54	0.005	214		tir1afb23 17°C	tir1afb123 17°C	0.000951	0.0014573
Col/20-3		Col-0 Ref	Col	Parent grown in 1240B (20°C)	2016-02-03	2016-02-05	56	0	0	0	56		1	0	0	0	0		0.99095	0.00904977	0	0			tir1afb23	23°C	0.085	0.884	0.031	237		tir1afb23 20°C	tir1afb123 20°C	0.00731408	0.00885347
Col/20-4		Col-0 Ref	Col	Parent grown in 1240B (20°C)	2016-02-03	2016-02-05	58	0	0	0	58		1	0	0	0	0								tir1afb123	17°C	0.121	0.844	0.036	142		tir1afb23 23°C	tir1afb123 23°C	0.00436614	0.0364258
						Average:	54.75	0.5	0	0	55.25														tir1afb123	20°C	0.333	0.643	0.024	198				*Used Fishers instead	Used http://www.biostathandbook.com/fishers.html template
Col/17-1		Col-0 Ref	Col	Parent grown in 1127A (17°C)	2016-02-14	2016-02-16	56	0	0	0	56		1	0	0	0	0	Col-0 17°C	0.995098	0	0	0.00490196	0.00490196		tir1afb123	23°C	0.036	0.805	0.159	238
Col/17-2		Col-0 Ref	Col	Parent grown in 1127A (17°C)	2016-02-14	2016-02-16	51	0	0	0	51		1	0	0	0	0	Combined	215	0	0	1			tir1afb24	20°C	0.991	0.009	0	224
Col/17-3		Col-0 Ref	Col	Parent grown in 1127A (17°C)	2016-02-14	2016-02-16	50	0	0	1	51		0.980392	0	0	0.0196078	0.0196078		0.99537	0	0	0.00462963			tir1afb25	20°C	0.753	0.197	0.05	181
Col/17-4		Col-0 Ref	Col	Parent grown in 1127A (17°C)	2016-02-14	2016-02-16	58	0	0	0	58		1	0	0	0	0								tir1afb245	17°C	0.573	0.4	0.027	222
						Average:	53.75	0	0	0.25	54														tir1afb245	20°C	0.631	0.369	0	161
t2/20-1	2184	tir1-1 afb2-3	Col	Parent grown in 1240B (20°C)	2016-02-14	2016-02-16	61	0	0	0	61		1	0	0	0	0	tir1 afb2 20°C	1	0	0	0	0		tir1afb245	23°C	0.42	0.572	0.008	255
t2/20-2		tir1-1 afb2-3	Col	Parent grown in 1240B (20°C)	2016-02-14	2016-02-16	50	0	0	0	50		1	0	0	0	0	Combined	218	0	0	0			tir1afb234	22°C*	0.016	0.4018	0.5822	438
t2/20-3		tir1-1 afb2-3	Col	Parent grown in 1240B (20°C)	2016-02-14	2016-02-16	52	0	0	0	52		1	0	0	0	0		1	0	0	0			tir1afb1234	22°C*	0.0129	0.5866	0.4005	387
t2/20-4		tir1-1 afb2-3	Col	Parent grown in 1240B (20°C)	2016-02-14	2016-02-16	55	0	0	0	55		1	0	0	0	0								* tir1afb234 and tir1afb1234 not grown in parallel with others
						Average:	54.5	0	0	0	54.5
t23/23-1	2185	tir1-1 afb2-3 afb3-4	Col	Parent grown in 5155 (23°C)	2016-02-14	2016-02-16	8	31	15	1	55		0.145455	0.563636	0.272727	0.0181818	0.854545	tir1 afb2 afb3 23°C	0.0849607	0.428311	0.456015	0.0307126	0.0221806
t23/23-2		tir1-1 afb2-3 afb3-4	Col	Parent grown in 5155 (23°C)	2016-02-14	2016-02-16	3	26	29	1	59		0.0508475	0.440678	0.491525	0.0169492	0.949153	Combined	20	100	110	7
t23/23-3		tir1-1 afb2-3 afb3-4	Col	Parent grown in 5155 (23°C)	2016-02-14	2016-02-16	3	24	25	5	57		0.0526316	0.421053	0.438596	0.0877193	0.947368		0.0843882	0.421941	0.464135	0.0295359
t23/23-4		tir1-1 afb2-3 afb3-4	Col	Parent grown in 5155 (23°C)	2016-02-14	2016-02-16	6	19	41	0	66		0.0909091	0.287879	0.621212	0	0.909091
						Average:	5	25	27.5	1.75	59.25
t23/20-1	2185	tir1-1 afb2-3 afb3-4	Col	Parent grown in 1240B (20°C)	2016-02-03	2016-02-05	37	12	14	0	63		0.587302	0.190476	0.222222	0	0.412698	tir1 afb2 afb3 20°C	0.455508	0.260737	0.278948	0.00480769	0.0473715
t23/20-2		tir1-1 afb2-3 afb3-4	Col	Parent grown in 1240B (20°C)	2016-02-03	2016-02-05	21	11	19	1	52		0.403846	0.211538	0.365385	0.0192308	0.596154	Combined	99	55	59	1
t23/20-3		tir1-1 afb2-3 afb3-4	Col	Parent grown in 1240B (20°C)	2016-02-03	2016-02-05	22	11	15	0	48		0.458333	0.229167	0.3125	0	0.541667		0.462617	0.257009	0.275701	0.0046729
t23/20-4		tir1-1 afb2-3 afb3-4	Col	Parent grown in 1240B (20°C)	2016-02-03	2016-02-05	19	21	11	0	51		0.372549	0.411765	0.215686	0	0.627451
							24.75	13.75	14.75	0.25	53.5
t23/17-1		tir1-1 afb2-3 afb3-4	Col	Parent grown in 1127A (17°C)	2016-02-15	2016-02-17	16	23	16	1	56		0.285714	0.410714	0.285714	0.0178571	0.714286	tir1 afb2 afb3 17°C	0.25972	0.330907	0.381742	0.0276304	0.00954186
t23/17-2		tir1-1 afb2-3 afb3-4	Col	Parent grown in 1127A (17°C)	2016-02-15	2016-02-17	14	13	27	1	55		0.254545	0.236364	0.490909	0.0181818	0.745455	Combined	51	66	72	5
t23/17-3		tir1-1 afb2-3 afb3-4	Col	Parent grown in 1127A (17°C)	2016-02-15	2016-02-17	6	7	11	1	25		0.24	0.28	0.44	0.04	0.76		0.262887	0.340206	0.371134	0.0257732
t23/17-4		tir1-1 afb2-3 afb3-4	Col	Parent grown in 1127A (17°C)	2016-02-15	2016-02-17	15	23	18	2	58		0.258621	0.396552	0.310345	0.0344828	0.741379
						Average:	12.75	16.5	18	1.25	48.5
2187/20-1		tir1-1 afb2-1 afb3-1	4XCol	Parent grown in 1240B (20°C)	2016-02-29	2016-03-04	27	15	15	4	61		0.442623	0.245902	0.245902	0.0655738	0.557377	tir1 afb2-1 afb3-1 (4×Col) 20°C	0.475881	0.156447	0.322547	0.0451253	0.0281231
2188/20-2		tir1-1 afb2-1 afb3-1	4XCol	Parent grown in 1240B (20°C)	2016-02-29	2016-03-04	28	11	25	1	65		0.430769	0.169231	0.384615	0.0153846	0.569231	Combined	118	39	80	11
2187/20-5		tir1-1 afb2-1 afb3-1	4XCol	Parent grown in 1240B (20°C)	2016-02-29	2016-03-04	28	4	23	4	59		0.474576	0.0677966	0.389831	0.0677966	0.525424		0.475806	0.157258	0.322581	0.0443548
2188/20-4		tir1-1 afb2-1 afb3-1	4XCol	Parent grown in 1240B (20°C)	2016-02-15	2016-02-17	35	9	17	2	63		0.555556	0.142857	0.269841	0.031746	0.444444
							29.5	9.75	20	2.75	62
t123/20-1	2186	tir1-1 afb1-3 afb2-3 afb3-4	Col	Parent grown in 1240B (20°C)	2016-02-03	2016-02-05	12	18	8	0	38		0.315789	0.473684	0.210526	0	0.684211	tir1 afb1 afb2 afb3 20°C	0.332692	0.337322	0.305635	0.0243511	0.0441713
t123/20-2		tir1-1 afb1-3 afb2-3 afb3-4	Col	Parent grown in 1240B (20°C)	2016-02-03	2016-02-05	Bad (not tir1afb123)			0								Combined	66	66	61	5
t123/20-3		tir1-1 afb1-3 afb2-3 afb3-4	Col	Parent grown in 1240B (20°C)	2016-02-03	2016-02-05	17	27	14	1	59		0.288136	0.457627	0.237288	0.0169492	0.711864		0.333333	0.333333	0.308081	0.0252525
t123/20-4		tir1-1 afb1-3 afb2-3 afb3-4	Col	Parent grown in 1240B (20°C)	2016-02-03	2016-02-05	13	12	21	3	49		0.265306	0.244898	0.428571	0.0612245	0.734694
t123/20-5		tir1-1 afb1-3 afb2-3 afb3-4	Col	Parent grown in 1240B (20°C)	2015-02-14	2016-02-16	24	9	18	1	52		0.461538	0.173077	0.346154	0.0192308	0.538462
							16.5	16.5	15.25	1	49.5
t24/20-1		tir1-1 afb2-3 afb4-8	Col	Parent grown in 1240B (20°C)	2016-02-15	2016-02-17	54	2	0	0	56		0.964286	0.0357143	0	0	0.0357143	tir1 afb2 afb4 20°C	0.991071	0.00892857	0	0	0.00892857
t24/20-2		tir1-1 afb2-3 afb4-8	Col	Parent grown in 1240B (20°C)	2016-02-15	2016-02-17	61	0	0	0	61		1	0	0	0	0	Combined	222	2	0	0
t24/20-3		tir1-1 afb2-3 afb4-8	Col	Parent grown in 1240B (20°C)	2016-02-15	2016-02-17	51	0	0	0	51		1	0	0	0	0		0.991071	0.00892857	0	0
t24/20-4		tir1-1 afb2-3 afb4-8	Col	Parent grown in 1240B (20°C)	2016-02-15	2016-02-17	56	0	0	0	56		1	0	0	0	0
						2016-02-17	55.5	0.5	0	0	56
t25/20-1		tir1-1 afb2-3 afb5-5	Col	Parent grown in 1240B (20°C)	2016-02-15	2016-02-17	31	5	3	2	41		0.756098	0.121951	0.0731707	0.0487805	0.243902	tir1 afb2 afb5 20°C	0.752981	0.136313	0.0605288	0.050177	0.0304631
t25/20-2		tir1-1 afb2-3 afb5-5	Col	Parent grown in 1240B (20°C)	2016-02-15	2016-02-17	31	4	2	0	37		0.837838	0.108108	0.0540541	0	0.162162	Combined	135	25	11	10
t25/20-3		tir1-1 afb2-3 afb5-5	Col	Parent grown in 1240B (20°C)	2016-02-15	2016-02-17	38	6	4	6	54		0.703704	0.111111	0.0740741	0.111111	0.296296		0.745856	0.138122	0.0607735	0.0552486
t25/20-4		tir1-1 afb2-3 afb5-5	Col	Parent grown in 1240B (20°C)	2016-02-15	2016-02-17	35	10	2	2	49		0.714286	0.204082	0.0408163	0.0408163	0.285714
						2016-02-17	33.75	6.25	2.75	2.5	45.25
t245/23-1		tir1-1 afb2-3 afb4-8 afb5-5	Col	Parent grown in 5155 (23°C)	2016-02-15	2016-02-17	36	14	22	0	72		0.5	0.194444	0.305556	0	0.5	tir1 afb2 afb4 afb5 23°C	0.419802	0.192415	0.379518	0.00826503	0.0347369
t245/23-2		tir1-1 afb2-3 afb4-8 afb5-5	Col	Parent grown in 5155 (23°C)	2016-02-15	2016-02-17	23	14	22	1	60		0.383333	0.233333	0.366667	0.0166667	0.616667	Combined	108	49	96	2
t245/23-3		tir1-1 afb2-3 afb4-8 afb5-5	Col	Parent grown in 5155 (23°C)	2016-02-15	2016-02-17	28	9	25	0	62		0.451613	0.145161	0.403226	0	0.548387		0.423529	0.192157	0.376471	0.00784314
t245/23-4		tir1-1 afb2-3 afb4-8 afb5-5	Col	Parent grown in 5155 (23°C)	2016-02-15	2016-02-17	21	12	27	1	61		0.344262	0.196721	0.442623	0.0163934	0.655738
						Average:	27	12.25	24	0.5	63.75
t245/20-1		tir1-1 afb2-3 afb4-8 afb5-5	Col	Parent grown in 1240B (20°C)	2016-02-15	Fungal contamination, could not be scored reliably)					0							tir1 afb2 afb4 afb5 20°C	0.631466	0.19976	0.168774	0	0.0162297
t245/20-2		tir1-1 afb2-3 afb4-8 afb5-5	Col	Parent grown in 1240B (20°C)	2016-02-15	2016-02-17	37	11	8	0	56		0.660714	0.196429	0.142857	0	0.339286	Combined	102	32	27	0
t245/20-3		tir1-1 afb2-3 afb4-8 afb5-5	Col	Parent grown in 1240B (20°C)	2016-02-15	2016-02-17	26	9	8	0	43		0.604651	0.209302	0.186047	0	0.395349		0.63354	0.198758	0.167702	0
t245/20-4		tir1-1 afb2-3 afb4-8 afb5-5	Col	Parent grown in 1240B (20°C)	2016-02-15	2016-02-17	39	12	11	0	62		0.629032	0.193548	0.177419	0	0.370968
							34	10.6667	9	0	40.25
t245/17-1		tir1-1 afb2-3 afb4-8 afb5-5	Col	Parent grown in 1127A (17°C)	2016-02-15	2016-02-17	34	17	0	1	52		0.653846	0.326923	0	0.0192308	0.346154	tir1 afb2 afb4 afb5 17°C	0.572944	0.39146	0.00892857	0.0266673	0.0475657
t245/17-2		tir1-1 afb2-3 afb4-8 afb5-5	Col	Parent grown in 1127A (17°C)	2016-02-15	2016-02-17	31	23	2	0	56		0.553571	0.410714	0.0357143	0	0.446429	Combined	127	87	2	6
t245/17-3		tir1-1 afb2-3 afb4-8 afb5-5	Col	Parent grown in 1127A (17°C)	2016-02-15	2016-02-17	25	29	0	2	56		0.446429	0.517857	0	0.0357143	0.553571		0.572072	0.391892	0.00900901	0.027027
t245/17-4		tir1-1 afb2-3 afb4-8 afb5-5	Col	Parent grown in 1127A (17°C)	2016-02-15	2016-02-17	37	18	0	3	58		0.637931	0.310345	0	0.0517241	0.362069
					2016-02-15	2016-02-17	31.75	21.75	0.5	1.5	55.5
						Average:
t123/23-1		tir1-1 afb1-3 afb2-3 afb3-4	Col	Parent grown in 5155 (23°C)	2016-02-29	2016-03-04	0	0	51	6	57		0	0	0.894737	0.105263	1	tir1 afb1 afb2 afb3 23°C	0.0360564	0.0207239	0.783899	0.159321	0.0305805
t123/23-2		tir1-1 afb1-3 afb2-3 afb3-4	Col	Parent grown in 5155 (23°C)	2016-02-29	2016-03-04	8	2	47	6	63		0.126984	0.031746	0.746032	0.0952381	0.873016	Combined	9	5	186	38
t123/23-3		tir1-1 afb1-3 afb2-3 afb3-4	Col	Parent grown in 5155 (23°C)	2016-02-29	2016-03-04	0	1	39	20	60		0	0.0166667	0.65	0.333333	1		0.0378151	0.0210084	0.781513	0.159664
t123/23-4		tir1-1 afb1-3 afb2-3 afb3-4	Col	Parent grown in 5155 (23°C)	2016-02-29	2016-03-04	1	2	49	6	58		0.0172414	0.0344828	0.844828	0.103448	0.982759
t123/17-1		tir1-1 afb1-3 afb2-3 afb3-4	Col	Parent grown in 1127A (17°C)	2016-02-29	2016-03-04												tir1 afb1 afb2 afb3 17°C	0.120635	0.284325	0.559524	0.0355159	0.0650794
t123/17-2		tir1-1 afb1-3 afb2-3 afb3-4	Col	Parent grown in 1127A (17°C)	2016-02-29	2016-03-04	4	7	60	1	72		0.0555556	0.0972222	0.833333	0.0138889	0.944444	Combined	17	40	80	5
t123/17-3		tir1-1 afb1-3 afb2-3 afb3-4	Col	Parent grown in 1127A (17°C)	2016-02-29	2016-03-04	13	33	20	4	70		0.185714	0.471429	0.285714	0.0571429	0.814286		0.119718	0.28169	0.56338	0.0352113
t123/17-4		tir1-1 afb1-3 afb2-3 afb3-4	Col	Parent grown in 1127A (17°C)
						Average:												Not included in Figure:
t25/23-1		tir1-1 afb2-3 afb5-5	Col	Parent grown in 5155 (23°C)	2016-02-29	2016-03-04	28	11	20	2	61		0.459016	0.180328	0.327869	0.0327869	0.540984	tir1 afb2 afb5 23°C	0.486181	0.121347	0.355975	0.0364971	0.01623
t25/23-2		tir1-1 afb2-3 afb5-5	Col	Parent grown in 5155 (23°C)	2016-02-29	2016-03-04	Genotype not confirmed											Combined	93	23	68	7
t25/23-3		tir1-1 afb2-3 afb5-5	Col	Parent grown in 5155 (23°C)	2016-02-29	2016-03-04	31	4	27	2	64		0.484375	0.0625	0.421875	0.03125	0.515625		0.486911	0.120419	0.356021	0.0366492
t25/23-4		tir1-1 afb2-3 afb5-5	Col	Parent grown in 5155 (23°C)	2016-02-29	2016-03-04	34	8	21	3	66		0.515152	0.121212	0.318182	0.0454545	0.484848
						Average:
t25/17-1		tir1-1 afb2-3 afb5-5	Col	Parent grown in 1127A (17°C)	2016-02-29	2016-03-04	45	10	3	3	61		0.737705	0.163934	0.0491803	0.0491803	0.262295	tir1 afb2 afb5 17°C	0.653862	0.166574	0.0418172	0.137747	0.04771
t25/17-2		tir1-1 afb2-3 afb5-5	Col	Parent grown in 1127A (17°C)	2016-02-29	2016-03-04	43	5	2	9	59		0.728814	0.0847458	0.0338983	0.152542	0.271186	Combined	157	40	10	33
t25/17-3		tir1-1 afb2-3 afb5-5	Col	Parent grown in 1127A (17°C)	2016-02-29	2016-03-04	32	14	4	9	59		0.542373	0.237288	0.0677966	0.152542	0.457627		0.654167	0.166667	0.0416667	0.1375
t25/17-4		tir1-1 afb2-3 afb5-5	Col	Parent grown in 1127A (17°C)	2016-02-29	2016-03-04	37	11	1	12	61		0.606557	0.180328	0.0163934	0.196721	0.393443
						Average:
