# Supplementary material for: Genetic analysis of the Arabidopsis TIR1/AFB auxin receptors reveals both overlapping and specialized functions
Source: eLife. 2020 Feb 18;9:e54740. doi: 10.7554/eLife.54740 (PMC7048394; doi:10.7554/eLife.54740)
Supplement: Supplementary file 1. [file elife-54740-supp1.xlsx]

## Sheet: Sheet1
Genotype	Background	Early Embryo Defects	% Rootless Embryos	% Siliques Missing Valves	Rosette	Short Inflorescence	Shoot Branching	Root Elongation on IAA	Lateral Root Production on IAA
Col-0	Col-0	–	0	0	–	–	–	–	–
tir1-1	Col-0	–	–	ND	+	–	–	+	++
tir1-10	Col-0	–	–	ND	+	–	–	+	++
afb1-3	Col-0	–	–	ND	–	–	–	–	–
afb2-3	Col-0	–	–	ND	–	–	–	–	+
afb3-4	Col-0	–	–	ND	–	–	–	–	–
afb4-8	Col-0	–	–	ND	–	–	–	–	–
afb5-5	Col-0	–	–	ND	–	+	–	–	–
tir1-1 afb1-3	Col-0	–	–	ND	+	–	–	+	+
tir1-1 afb2-3	Col-0	–	0	ND	++	+	–	++	+++
tir1-1 afb2-1	Col/Ws (4×Col)	–	ND	ND	+	+	–	+	+++
tir1-1 afb3-4	Col-0	–	0	ND	++	+	–	++	+++
tir1-1 afb3-1	Col/Ws (4×Col)	–	ND	ND	+	+	–	+	+++
tir1-1 afb4-8	Col-0	–	–	ND	–	–	–	+	++
tir1-1 afb5-5	Col-0	–	–	ND	+	++	+	++	++
afb1-3 afb2-3	Col-0	–	–	ND	–	–	–	–	+
afb1-3 afb3-4	Col-0	–	–	ND	–	–	–	–	+
afb1-3 afb4-8	Col-0	–	–	ND	–	+	–	–	–
afb1-3 afb5-5	Col-0	–	–	ND	–	+	–	–	+
afb2-3 afb3-4	Col-0	–	–	ND	–	+	–	+	+++
afb2-1 afb3-1	Col/Ws (4×Col)	–	–	ND	–	+	–	+	+
afb2-3 afb4-8	Col-0	–	–	ND	–	+	–	+	+
afb2-3 afb5-5	Col-0	–	–	ND	–	+	–	+	++
afb3-4 afb4-8	Col-0	–	–	ND	–	+	–	–	+
afb3-4 afb5-5	Col-0	–	–	ND	–	+	–	+	++
afb4-8 afb5-5	Col-0	–	–	ND	–	++	+	+	++
tir1-1 afb1-3 afb2-3	Col-0	–	–	ND	+++	++	–	+++	+++
tir1-1 afb1-3 afb3-4	Col-0	–	–	ND	++	+	–	++	++
tir1-1 afb1-3 afb4-8	Col-0	–	–	ND	+	+	–	+	++
tir1-1 afb1-3 afb5-5	Col-0	–	–	ND	+	++	–	+	++
tir1-1 afb2-3 afb3-4	Col-0	–	0.54	0.53	+++	++++	–	++++	++++
tir1-1 afb2-1 afb3-1	Col/Ws (4×Col)	–	0.52	ND	+++	++++	–	++++	++++
tir1-1 afb2-3 afb4-8	Col-0	–	0.01	ND	++	+	–	++	++++
tir1-1 afb2-3 afb5-5	Col-0	–	0.25	ND	+++	+++	–	++++	++++
tir1-1 afb3-4 afb4-8	Col-0	–	–	ND	++	++	–	+	+++
tir1-1 afb3-4 afb5-5	Col-0	–	–	ND	+	+++	++	++	+++
tir1-1 afb4-8 afb5-5	Col-0	–	–	ND	+	++	+++	++	+++
afb1-3 afb2-3 afb3-4	Col-0	–	–	ND	–	–	–	+	++
afb1-3 afb2-3 afb4-8	Col-0	–	–	ND	–	+	–	–	–
afb1-3 afb2-3 afb5-5	Col-0	–	–	ND	–	+	–	+	+
afb1-3 afb3-4 afb4-8	Col-0	–	–	ND	–	+	–	–	–
afb1-3 afb3-4 afb5-5	Col-0	–	–	ND	–	+	–	+	+
afb1-3 afb4-8 afb5-5	Col-0	–	–	ND	–	+	+	+	+
afb2-3 afb3-4 afb4-8	Col-0	–	–	ND	–	+	–	++	++
afb2-3 afb3-4 afb5-5	Col-0	–	–	ND	–	++	–	++	+++
afb2-3 afb4-8 afb5-5	Col-0	–	–	ND	–	++	+	+	+++
afb3-4 afb4-8 afb5-5	Col-0	–	–	ND	–	++	+	+	+++
tir1-1 afb1-3 afb2-3 afb3-4	Col-0	–	0.67	ND	++++	++++	–	++++	++++
tir1-1 afb1-3 afb2-3 afb4-8	Col-0	–	ND	0	++	+	–	+++	+++
tir1-1 afb1-3 afb2-3 afb5-5	Col-0	–	ND	0.35	++	++	+	+++	++++
tir1-1 afb1-3 afb3-4 afb4-8	Col-0	–	–	0.02	+	+	+	+	++
tir1-1 afb1-3 afb3-4 afb5-5	Col-0	–	–	0	+	+++	++	+++	++++
tir1-1 afb1-3 afb4-8 afb5-5	Col-0	–	–	ND	–	++	++	+	+++
tir1-1 afb2-3 afb3-4 afb4-8	Col-0	–	98% (22°C)	ND	ND	ND	ND	ND	ND
tir1-1 afb2-3 afb3-4 afb5-5	Col-0	embryo lethal	NA	NA	NA	NA	NA	NA	NA
tir1-10 afb2-1 afb3-1 afb5-5	Col/Ws (8×Col)	embryo lethal	NA	NA	NA	NA	NA	NA	NA
tir1-1 afb2-3 afb4-8 afb5-5	Col-0	–	0.37	0.78	++++	++++	+	++++	++++
tir1-1 afb3-4 afb4-8 afb5-5	Col-0	–	–	0.03	+++	++++	++++	++	++++
afb1-3 afb2-3 afb3-4 afb4-8	Col-0	–	–	ND	–	+	–	+	+
afb1-3 afb2-3 afb3-4 afb5-5	Col-0	–	–	ND	–	++	–	++	+++
afb1-3 afb2-3 afb4-8 afb5-5	Col-0	–	–	ND	–	++	+	+	+++
afb1-3 afb3-4 afb4-8 afb5-5	Col-0	–	–	ND	–	++	+	+	+
afb2-3 afb3-4 afb4-8 afb5-5	Col-0	–	–	ND	+++	++++	++	+	++++
tir1-1 afb1-3 afb2-3 afb3-4 afb4-8	Col-0	–	99% (22°C)	ND	ND	ND	ND	ND	ND
tir1-1 afb1-3 afb2-3 afb3-4 afb5-5	Col-0	embryo lethal	NA	NA	NA	NA	NA	NA	NA
tir1-10 afb1-3 afb2-1 afb3-1 afb5-5	Col/Ws (8×Col)	embryo lethal	NA	NA	NA	NA	NA	NA	NA
tir1-1 afb1-3 afb2-3 afb4-8 afb5-5	Col-0	–	43% (22°C)	0.32	++++	++++	++	++++	++++
tir1-1 afb1-3 afb3-4 afb4-8 afb5-5	Col-0	–	–	0.09	+++	++++	++++	++	++++
tir1-10 afb1-3 afb3-4 afb4-8 afb5-5	Col/Ws (8×Col)	–	–	ND	ND	ND	ND	ND	ND
tir1-1 afb2-3 afb3-4 afb4-8 afb5-5	Col-0	embryo lethal	NA	NA	NA	NA	NA	NA	NA
afb1-3 afb2-3 afb3-4 afb4-8 afb5-5	Col-0	–	–	0.1	+++	++++	++	+	++++
afb1-3 afb2-1 afb3-4 afb4-8 afb5-5	Col/Ws (8×Col)	–	–	ND	ND	ND	ND	ND	ND
afb1-3 afb2-1 afb3-1 afb4-8 afb5-5	Col/Ws (8×Col)	–	–	ND	ND	ND	ND	ND	ND
tir1-1 afb1-3 afb2-3 afb3-4 afb4-8 afb5-5	Col-0	embryo lethal	NA	NA	NA	NA	NA	NA	NA
tir1-10 afb1-3 afb2-3 afb3-4 afb4-8 afb5-5	Col/Ws (9×Col)	embryo lethal	NA	NA	NA	NA	NA	NA	NA
tir1-10 afb1-3 afb2-1 afb3-4 afb4-8 afb5-5	Col/Ws (9×Col)	embryo lethal	NA	NA	NA	NA	NA	NA	NA
Summary of phenotypes for mutant combinations. For the quantitative traits (Figure 1—figure supplement 4), the ranges for each of the phenotypes were divided into five bins, from "–" to "++++" in increasing severity. NA, Not applicable (embryo or seedling lethal); ND, not determined. The "% Rootless Embryo" column reflects the percent of rootless and inviable seedlings from plants grown at 20°C e…

## Sheet: Sheet2
tir1-1
afb1-3
afb2-3
afb3-4
afb4-8
afb5-5
tir1afb1
tir1afb2
tir1afb3
tir1afb4
tir1afb5
afb12
afb13
afb14
afb15
afb23
afb24
afb25
afb34
afb35
afb45
tir1afb12
tir1afb13
tir1afb14
tir1afb15
tir1afb23
tir1afb24
tir1afb25
tir1afb34
tir1afb35
tir1afb45
afb123
afb124
afb125
afb134
afb135
afb145
afb234
afb235
afb245
afb345
tir1afb123
tir1afb124
tir1afb125
tir1afb134
tir1afb135
tir1afb145
tir1afb234
tir1afb235
tir1afb245
tir1afb345
afb1234
afb1235
afb1245
afb1345
afb2345
tir1afb1234
tir1afb1235
tir1afb1245
tir1afb1345
tir1afb2345
afb12345
tir1afb12345
