# Supplementary material for: Genetic analysis of the Arabidopsis TIR1/AFB auxin receptors reveals both overlapping and specialized functions
Source: eLife. 2020 Feb 18;9:e54740. doi: 10.7554/eLife.54740 (PMC7048394; doi:10.7554/eLife.54740)
Supplement: Supplementary file 2. [file elife-54740-supp2.xlsx]

## Sheet: Just TIR1 AFB5 AFB2
		Genotype of gamete
	Parent	Complemented (%)		sextuple (%)		n	exp(+)	exp(–)	𝜒2	p
TIR1/AFB5/AFB2-d2/+ tir1-1 afb2-3 afb1345	♂	107	0.560209	84	0.439791	191	95.5	95.5	2.76963	0.0960682
	♀	54	0.556701	43	0.443299	97	48.5	48.5	1.24742	0.264045
TIR1/AFB5/AFB2-d2/+ tir1-10 afb2-1 afb1345	♂	118	0.464567	136	0.535433	254	127	127	1.27559	0.258721
	♀	133	0.507634	129	0.492366	262	131	131	0.0610687	0.804815
Combined	♂	225	0.505618	220	0.494382	445	222.5	222.5	0.0561798	0.812639
	♀	187	0.520891	172	0.479109	359	179.5	179.5	0.626741	0.428553
Plants of the given genotype were used in crosses to wild type (Col-0) as either the pollen donor (♂) or the recipient (♀). The progeny were sprayed with herbicide to identify F1 progeny inheriting the transgene. The Chi-squared tests compared the observed numbers of sextuple and complemented-sextuple gametophytes to the expected 1:1 ratio.

## Sheet: Figure-all
Figure 3—figure supplement 2. Gamete transmission through the megagametophyte and pollen
		Genotype of gamete
	Parent	non-sextuple (%)		sextuple (%)		n	exp(+)	exp(–)	𝜒2	p
tir1/+ afb2/+ afb3 afb4 afb5	♂	18	0.818182	4	0.181818	22	18.1147	3.88531	0.00411193	0.948871	RF
	♀	15	0.75	5	0.25	20	16.4679	3.5321	0.740891	0.389376	0.35321
tir1/+ afb1 afb2/+ afb3 afb4 afb5	♂	20	0.666667	10	0.333333	30	20.2981	9.70186	0.0135414	0.907361	RF
	♀	31	0.837838	6	0.162162	37	25.0344	11.9656	4.39583	0.0360269	0.64679
tir1/+ afb1 afb2 afb3 afb4 afb5/+	♂	14	0.736842	5	0.263158	19	14.25	4.75	0.0175439	0.894626
	♀	19	0.863636	3	0.136364	22	16.5	5.5	1.51515	0.218355
tir1 afb1 afb2 afb3/+ afb4 afb5/+	♂	22	0.709677	9	0.290323	31	23.25	7.75	0.268817	0.604126
	♀	20	0.8	5	0.2	25	18.75	6.25	0.333333	0.563703
tir1 afb1 afb2/+ afb3 afb4/+ afb5	♂	34	0.871795	5	0.128205	39	29.25	9.75	3.08547	0.0789944
	♀	11	0.846154	2	0.153846	13	9.75	3.25	0.641026	0.42334
TIR1/AFB5/AFB2-d2/+ tir1-1 afb1 afb2-3 afb3 afb4 afb5	♂	107	0.560209	84	0.439791	191	95.5	95.5	2.76963	0.0960682
	♀	54	0.556701	43	0.443299	97	48.5	48.5	1.24742	0.264045
TIR1/AFB5/AFB2-d2/+ tir1-10 afb1 afb2-1 afb3 afb4 afb5	♂	118	0.464567	136	0.535433	254	127	127	1.27559	0.258721
	♀	133	0.507634	129	0.492366	262	131	131	0.0610687	0.804815
Combined, double heterozygotes	♂	108	0.765957	33	0.234043	141	105.163	35.8372	0.301156	0.583159
	♀	96	0.820513	21	0.179487	117	86.5023	30.4977	4.00064	0.045483
Combined, TIR1/AFB5/AFB2-d2/+ tir1afb12345	♂	225	0.505618	220	0.494382	445	222.5	222.5	0.0561798	0.812639
	♀	187	0.520891	172	0.479109	359	179.5	179.5	0.626741	0.428553
Combined	♂	333	0.568259	253	0.431741	586	327.663	258.337	0.197199	0.656991
	♀	283	0.594538	193	0.405462	476	266.002	209.998	2.462	0.11663
Plants of the given genotype were used in crosses to wild type (Col-0) as either the pollen donor (♂) or the recipient (♀). For the double heterozygote lines, progeny were PCR genotyped for the two segregating loci (bold) plus a third non-segregating locus (underlined) as a control. For the lines segregating the TIR1/AFB5/AFB2 transgene, the progeny were sprayed with Basta to identify F1 progeny …
tir1/+ ±afb1 afb2/+ afb3 afb4 afb5	♂	38	0.730769	14	0.269231	52	42.8165	9.18345	3.06802	0.0798468	RF
	♀	46	0.807018	11	0.192982	57	46.9335	10.0665	0.105139	0.745747	0.35321
cis or trans?

## Sheet: old Figure
Figure 3—figure supplement 2. Gamete transmission through the megagametophyte and pollen
		Genotype of gamete at segregating loci*
Genotype	Parent	+ +	(%)	+ –	(%)	– +	(%)	– –	(%)	n	𝜒2	P
tir1/+ afb1 afb2/+ afb3 afb4 afb5	♂	5	0.166667	9	0.3	6	0.2	10	0.333333	30	1.11111	0.291841
	♀	11	0.297297	13	0.351351	7	0.189189	6	0.162162	37	1.52252	0.217238
tir1/+ afb1 afb2 afb3 afb4 afb5/+	♂	4	0.210526	7	0.368421	3	0.157895	5	0.263158	19	0.0175439	0.894626
	♀	6	0.272727	9	0.409091	4	0.181818	3	0.136364	22	1.51515	0.218355
tir1 afb1 afb2 afb3/+ afb4 afb5/+	♂	6	0.193548	6	0.193548	10	0.322581	9	0.290323	31	0.268817	0.604126
	♀	4	0.16	9	0.36	7	0.28	5	0.2	25	0.333333	0.563703
tir1 afb1 afb2/+ afb3 afb4/+ afb5	♂	13	0.333333	13	0.333333	8	0.205128	5	0.128205	39	3.08547	0.0789944
	♀	3	0.230769	5	0.384615	3	0.230769	2	0.153846	13	0.641026	0.42334
Total	♂	28	0.235294	35	0.294118	27	0.226891	29	0.243697	119	0.0252101	0.873845
	♀	24	0.247423	36	0.371134	21	0.216495	16	0.164948	97	3.74227	0.0530524
Plants of the given genotype were used in crosses to wild type (Col-0) as either the pollen donor (♂) or the recipient (♀). Progeny were genotyped for the two segregating loci (bold) plus a third non-segregating locus (underlined) as a control. * Order of loci is the same as in first column. The Chi-squared test compared the observed numbers of sextuple and non-sextuple gametophytes to the expect…

## Sheet: old old figure
Gamete transmission through the mega- and microgametophyte
		Genotype of gamete at segregating loci*
Genotype	Parent	+ +	(%)	+ –	(%)	– +	(%)	– –	(%)	n	𝜒2	line #
tir1/+ AFB1+ afb2/+ afb3 afb4 afb5	♂	8	0.363636	5	0.227273	5	0.227273	4	0.181818	22		2446
	♀	8	0.4	2	0.1	5	0.25	5	0.25	20		2447
tir1/+ afb1 afb2/+ afb3 afb4 afb5	♂	5	0.166667	9	0.3	6	0.2	10	0.333333	30		2448
	♀	11	0.297297	13	0.351351	7	0.189189	6	0.162162	37		2449
tir1/+ afb1 afb2 afb3 afb4 afb5/+	♂	4	0.210526	7	0.368421	3	0.157895	5	0.263158	19		2444
	♀	6	0.272727	9	0.409091	4	0.181818	3	0.136364	22		2445
tir1 afb1 afb2 afb3/+ afb4 afb5/+	♂	6	0.193548	6	0.193548	10	0.322581	9	0.290323	31		2450
	♀	4	0.16	9	0.36	7	0.28	5	0.2	25		2451
tir1 afb1 afb2/+ afb3 afb4/+ afb5	♂	13	0.333333	13	0.333333	8	0.205128	5	0.128205	39		2452
	♀	3	0.230769	5	0.384615	3	0.230769	2	0.153846	13		2453
Total†	♂	28	0.235294	35	0.294118	27	0.226891	29	0.243697	119	0.73
	♀	24	0.247423	36	0.371134	21	0.216495	16	0.164948	97	0.03
Plants of the given genotype were used in crosses to wild type (Col-0) as either the pollen donor (♂) or the recipient (♀). Progeny were genotyped for the two segregating loci (bold) plus a third non-segregating locus (underlined) as a control. * Order of loci is the same as in first column. † Totals for crosses segregating the sextuple mutant (lines 3-10).
tir1-afb2/++ afb345 (♂+♀)	16	7	10	9	7.35	13.65	13.65	7.35	42	0.00202785
tir1-+/+-afb2 afb345 (♂+♀)	16	7	10	9	13.65	7.35	7.35	13.65	42	0.397716	2.29254	0.666667
tir1-afb2/++ afb1345 (♂+♀)	16	22	13	16	11.725	21.775	21.775	11.725	67	0.083713	1.09612	0.333333
tir1-+/+-afb2 afb1345 (♂+♀)	16	22	13	16	21.775	11.725	11.725	21.775	67	0.00670928

## Sheet: model comparisons
Transmission through megagametophyte (mgg)
	n	Obs. sextuple %		Exp sextuple*	% missing	p	Exp sextuple*	% missing	p	Exp sextuple*	% missing	p
double hets combined**	117	21	0.179487	33.43	0.371822	0.011	25.07	0.162345	0.36	30.5	0.311475	0.045
Comp-sextuple combined	359	172	0.479109	179.5	0.0417827	0.429
All combined	476	193	–	212.93	0.0935988	0.066	204.57	0.0565577	0.284	210	0.0809524	0.117
*Assumptions
tir1–afb2 are in cis 44 cM apart in both tir1/+afb2/+afb345 and tir1/+afb2/+afb1345
Kosambi: 44 cM=65% tir1 transmitted with afb2
tir1–afb2 are in trans 44 cM apart in both tir1/+afb2/+afb345 and tir1/+afb2/+afb1345
Kosambi: 44 cM=35% tir1 transmitted with afb2
Unlikely because sextuple is then overrepresented in pollen transmission
tir1–afb2 are in trans in tir1/+afb2/+afb345 and cis in tir1/+afb2/+afb1345
Best fits expected pollen transmission rate
**including tir1/+afb2/+afb345 as well as tir1/+afb2/+afb1345

## Sheet: Kosambi
0.44	AGI map distance between TIR1 and AFB2									0.3234	0.1766	0.1766	0.3234				0.1766	0.3234	0.3234	0.1766
0.35321	expected recombination rate from Kosambi Mapping function									t2	t+	+2	++				t2	t+	+2	++
0.64679	Expected rate of parental chromosome							0.3234	t2	0.104588	0.0571124	0.0571124	0.104588		0.1766	t2	0.0311876	0.0571124	0.0571124	0.0311876
								0.1766	t+	0.0571124	0.0311876	0.0311876	0.0571124		0.3234	t+	0.0571124	0.104588	0.104588	0.0571124
								0.1766	+2	0.0571124	0.0311876	0.0311876	0.0571124		0.3234	+2	0.0571124	0.104588	0.104588	0.0571124
								0.3234	++	0.104588	0.0571124	0.0571124	0.104588		0.1766	++	0.0311876	0.0571124	0.0571124	0.0311876
tir1/+afb2/+afb1345's pedigree
											F2	F3	F4
1462	afb2/+tir1afb135 x afb4-8									0.209175	0.7703	0.7703					0.0623751	0.2297
1486	F2									0.0623751	0.2297	0.2297					0.209175	0.7703
1486-7>1547	[tir1- 1-afb2]/[+-+] afb1/afb1 afb3/afb3 afb4/+ afb5/afb5
1547-35>1741	tir1/+afb2/+afb1345
