# Supplementary material for: Genetic analysis of the Arabidopsis TIR1/AFB auxin receptors reveals both overlapping and specialized functions
Source: eLife. 2020 Feb 18;9:e54740. doi: 10.7554/eLife.54740 (PMC7048394; doi:10.7554/eLife.54740)
Supplement: Supplementary file 4. [file elife-54740-supp4.xlsx]

## Sheet: Sheet1
Primer	Sequence	Comments
pROK-LB	ggaaccaccatcaaacagga	T-DNA LB primer for tir1-10, afb1-3, afb2-3, afb3-4, afb4-8, afb5-5
pD991-LB	taacgctgcggacatctaca	T-DNA LB primer for afb2-1 and afb3-1
p1003-LB	catagatgcactcgaaatcagc	T-DNA LB primer for tir1-9
tir1-1F2	agcgacggtgattaggaggt	tir1-1 genotyping with tir1-1R2 (BsaI digest)
TIR1-gwF	caccatgcagaagcgaatagcctt	tir1-1 genotyping with tir1-1R2 or TIR1-LR (BsaI digest)
tir1-1R2	caggaacaacgcagcaaaa	tir1-1 genotyping
TIR1-LR	tgtacctcgtttctttgtcttataatc	tir1-1 genotyping with TIR1-gwF (BsaI digest) (for TIR1-mCitrine/mOrange2)
TIR1-9TF	attgaggccatgtcttcgtc	tir1-9 genotyping with p1003-LB and TIR1-10TF
TIR1-10TR	ccactaacgtcgtcaacatcac	tir1-10 genotyping with pROK-LB and TIR1-9TF
TIR1-LR2	ttatatgggatgatgaacaaggatt	tir1-10 genotyping with TIR1-gwF (for TIR1-mCitrine/mOrange2)
AFB1+F	ggcgaaaagttcgtctcttg	afb1-3 genotyping with AFB1-TR2
AFB1-TR2	gatcaggcattcggacagtag	afb1-3 genotyping with pROK-LB and AFB1+F
AFB1-LR	gggaacaaatggaaggtgaa	afb1-3 genotyping with pROK-LB and AFB1+F (for AFB1-mCitrine)
AFB2+F	ttctccttcgatcattgtcaac	afb2-3 genotyping with AFB2-TR, afb2-1 with pD991-LB and AFB2-TR
AFB2-TR	tagcggcaatagaggcaaga	afb2-3 genotyping with pROK-LB and AFB2+F, afb2-1 with AFB2-TR
AFB2-LR	gaagacgaccaatcagaacca	afb2-3 (afb2-1) genotyping with pROK-LB (pD991-LB) and AFB2+F (for AFB2-mCitrine)
AFB3+F	gggtctaagacggctctctg	afb3-4 and afb3-1 genotyping with AFB3-TR
AFB3-TR	caatggctgaattacggtga	afb3-4 genotyping with pROK-LB and AFB3+F, afb3-1 with pD991-LB and AFB3+F
AFB4-8-TF	ggctcttcttgctgagtcgt	afb4-8 genotyping with pROK-LB and AFB4-8+R
AFB4-8+R	ctgcataatccggttgttgtt	afb4-8 genotyping with AFB4-8+R
AFB4-3uR	tgcttgctagttttgcttttcc	afb4-8 genotyping with AFB4-8-TF (for AFB4-mCitrine)
AFB5+F2	aaatcttggtggcgtgttg	afb5-5 genotyping with AFB5-TR3
AFB5-TR3	gcataatctggttcttgctcact	afb5-5 genotyping with pROK-LB and AFB5+F2
AFB5-LR2	gagcttcctacacttacccatttc	afb5-5 genotyping with pROK-LB and AFB5+F2 (for AFB5-mCitrine/mCherry)
TIR1-AscF	aatggcgcgccactttacttgtacttgtacacca	Amplifying TIR1 genomic region
TIR1-MluR	tttacgcgtcattggtccaaccataga	Amplifying TIR1 genomic region
TIR1nhe-F	aaatcattactactaacggattaggagctagcgaaacgaggtacatttttc	Changing TIR1 stop codon to a NheI site
TIR1nhe-R	gaaaaatgtacctcgtttcgctagctcctaatccgttagtagtaatgattt	Changing TIR1 stop codon to a NheI site
AFB1-MluF	gaaacgcgtctatgagaaaatctaaccaatc	Amplifying AFB1 genomic region
AFB1-AscR	gatggcgcgcccagtgaggagaagttgctg	Amplifying AFB1 genomic region
AFB1nhe-pF	gccataaagggagctagctgcttcagtcatattttcctttc	Changing AFB1 stop codon to a NheI site
AFB1nhe-pR	gaagcagctagctccctttatggctagatgtgaaactcc	Changing AFB1 stop codon to a NheI site
AFB2-MluF	ttgacgcgtttagtgtgttattcatctttttttgtc	Amplifying AFB2 genomic region
AFB2-AscR	tctggcgcgccttctgaattggggc	Amplifying AFB2 genomic region
AFB2nhe-F	ccatttgtgtggattctcggagctagcttcagaccaaactggttc	Changing AFB2 stop codon to a NheI site
AFB2nhe-R	gaaccagtttggtctgaagctagctccgagaatccacacaaatgg	Changing AFB2 stop codon to a NheI site
AFB3-MluF	ttgacgcgtaacttccattctgtgtga	Amplifying AFB3 genomic region
AFB3-AscR	agaggcgcgccagtctctgtggatctc	Amplifying AFB3 genomic region
AFB3ns-NheR	gcagctagccccaagaatcctaacatatggtggtgc	Changing AFB3 stop codon to a NheI site
AFB3ns-NheF	taggctagctgcaccttcatgtgttttcaa	Changing AFB3 stop codon to a NheI site
AFB4-AscF	ttaggcgcgcctcaaatttgggaaagagataggtg	Amplifying AFB4 genomic region
AFB4-MluR	attacgcgtggtttcaattcaacaaggtc	Amplifying AFB4 genomic region
AFB4nhe-F	caaagtttgtaacaattttaggagctagcctttggtgcaaatgaggcca	Changing AFB4 stop codon to a NheI site
AFB4nhe-R	ggcctcatttgcaccaaaggctagctcctaaaattgttacaaactttgg	Changing AFB4 stop codon to a NheI site
AFB5-AscF	gagggcgcgccttatctagctaggttttatgtgcatatt	Amplifying AFB5 genomic region
AFB5-AscR	cacggcgcgcccaaaagtctatggctcca	Amplifying AFB5 genomic region
AFB5nhe-F	aaagttcgtcacgattttaggggctagcgagcatttccgtgtttcc	Changing AFB5 stop codon to a NheI site
AFB5nhe-R	ggaaacacggaaatgctcgctagcccctaaaatcgtgacgaacttt	Changing AFB5 stop codon to a NheI site
mCitrine-xbaF	agatctagaggaggtggaggtggagctgtgagcaagggcgagga	Adds XbaI-and linker (Arg-Gly-Gly-Gly-Gly-Gly-Ala-Val) before standardized fluoresent-protein-encoding genes
mCitrine-xbaR	tactctagaattacttgtacagctcgtccatgc	Adds XbaI-after stop codon of standardized fluoresent-protein-encoding genes
mCherry-xbaF	agatctagaggaggtggaggagctatggtgagcaagggcga	Adds XbaI-and linker (Arg-Gly-Gly-Gly-Gly-Ala-Met) before standardized fluoresent-protein-encoding genes
mCherry-xbaR	tactctagattacttgtacagctcgtccatgc	Adds XbaI-after stop codon of standardized fluoresent-protein-encoding genes
CamsaAFB1-F1	cacggatcctgaaccaaatctcaaaccttttc	Amplifying AFB1 genomic region from Camelina species
CamsaAFB1-R1	aaaggatccaaaaagatgactgaagcagcaag	Amplifying AFB1 genomic region from Camelina species
CamsaAFB1-R2	aacggatccaaagagaacaaatgggaggtga	Amplifying AFB1 genomic region from Camelina species
mTU2_P2RP3_F	ggggacagctttcttgtacaaagtggctgtgagcaagggcgaggagctgttc	Cloning 2×mTurqoise2/pDONR-P2RP3
mTU2_P2RP3_wSTOP_R	ggggacaactttgtataataaagttgctagcttgtacagctcgtccatgccgag	Cloning 2×mTurqoise2/pDONR-P2RP3
INS_mTU2_P2RP3_F	taactagcaactttattatacaaagttggc	Cloning 2×mTurqoise2/pDONR-P2RP3
INS_mTU2_P2RP3_wSTOP_R	accaccagcactaccaccagcacttccggacttgtacagctcg	Cloning 2×mTurqoise2/pDONR-P2RP3
BB_mTU2_ P2RP3_F	gctgtacaagtccggaagtgctggtggtagtgctggtggtgtgagcaagggcgaggag	Cloning 2×mTurqoise2/pDONR-P2RP3
BB_mTU2_ P2RP3_R	tgtataataaagttgctagttacttgtacagctcgtccatgc	Cloning 2×mTurqoise2/pDONR-P2RP3
