# Supplementary material for: Genetic analysis of the Arabidopsis TIR1/AFB auxin receptors reveals both overlapping and specialized functions
Source: eLife. 2020 Feb 18;9:e54740. doi: 10.7554/eLife.54740 (PMC7048394; doi:10.7554/eLife.54740)
Supplement: Supplementary file 5. [file elife-54740-supp5.nex]

#NEXUS
BEGIN DATA;
	DIMENSIONS NTAX=357 NCHAR=710;
	FORMAT DATATYPE=PROTEIN MISSING=? GAP=- ;
MATRIX
	Cylindrocystis_brebissonii_YOXI2051391 NL-LEAFPDDL----LARIVDFLDA-NDRRSISMTCWRLHCVENCTRREVVLRTGYCISPERLVQRYPSLTHVTIKAVTFGADLWDDGIHSRRFTVYRP--QVVDHRPRWLRTLADNYA-LLAHVHAWGVAVANEEVVHLAA-SC-SRTLRVVRLLQCWGFSGQAIMVLAEQCRVLEVLDVEGSRLE--S-NCDWPLLFARTSTNVKDVNLWAPRK--TT-Y-SVGMESDIAHLKLSGLRRLRMD-------------------------------------------------------------------------------------------------------------------…
	Cylindrocystis_sp_VAZE2053808 SF-LEALPDDL----FSQVLYFLSS-KDCKALSATCRRLHCLEGSARTEVTLRNGYCILPERVVQRYPRLTHVTINAVRFGADLWDDSIHSRRFTLYKP--QVVEPSPSWLRVLADGYP-WLAHVHAWGIAVTDEELGHLAT-SC-WRTLRVVRLLHCWGFSWKGVLRLAELCPILEVLDVEGSRME--S-TGDWPLKFVQTSSHVKDLNLLAPRK--TP-F-SAGMEAKIASLKLSGLRRLRMDDAYDL-------------PSGVK---------IAA-TNP-DLEDLRLGECVRLQER--TGRSDAEWGREL---AK-KALRSLGGLIGLLGETGNPERLSLILPVAPQLTCLDLSQTF-LVEDSL…
	Roya_obtusa_XRTZ2005787 AA-EDNFPSKV----LTRILSFLDS-GTRFSFSQACKRFFALESVTRTSVALRHGRSISPDRLARRFPNLRSLSIGCVRTGSV-WDSDSDHKHMMLAPA--PSEYSASKWIRLIVLAYP-RLKELRLWNLVVTDGALLELGV-TC-GRTLEVLKLLHCRSFSAAGLASLSRSCPNLRSLVKSSCPTA--PESGQWSPPLTESCGQLQEVDLTPGHA--FG-R-LSSLTRLVSL--RMDSRTWRASS------------------ALSV---------AAA-NAE-TLTDLWLGECD--ESV--EDQPQEGIAEAL---KS-VNLKSLGGLL-LM----RMKDVALIEPIVPQLSRLDLGHSY-LFSSQLGLFRDH…
	Coleochaete_scutata_VQBJ2011792 AH-VLQLPYEL----QENILSRLDKYADRASVSLSCRSWLKLEGWVRRRVKLRHCYAILPERVIERFPRMTALTIGGERFTASLCDDSPEYDDWHFFTL--SGSKRGQQWIHMLAQSFP-HLEELCLWHLELSDEDLKTLGD-AC-GQSLRVVRLLSCLGFGPGGLAYIISKCRALEMFHIDRSALV--QDRTTDESMLQAQ-----------------------LTNALVRH--RATLQDLGLRPDVNCSLPVSWPQLCQGLTNLTSLEAREPLKEATG-QLPASLVRLKMERG----------------CERL---KS-PNLQSLGGCL--LDLANNREALEGLRSVACSLVTLNLIGTA-LYGE…
	Coleochaete_irregularis_QPDY2030019 PQ-ILHLPCEL----QENIIRRMHTYADKVAVSLCCKSWYKLEGLVREDVKVRHCYAIQPERLAERFPKMTSLTVGGERFHASLSDDSPECEDWHFFTL--SATKRGSKWITMLSRHFT-HLQRLCLWHLELSDHDLKVLGD-AC-GRTLLVVKLLSCLGFGPQGLAHLINACHQLESFHIDRSALT--QDPASDESSLQAC-----------------------LTDALMRH--SHSLRDLGLRPDVNCSLPILWPKLCESLVCLTTLEAREPLREATG-RLPQSLVRLKMERG----------------CERL---KG-TSLHCLGGCL--LDLASNRAALEGLRSVAPSLVTLNLIGTT-…
	Cylindrocystis_cushleckae_JOJQ2003471 SV-IETLPIDV----LCHVISFLDS-STKLTVSLVSKRLHKVEGESRLQISIRNCLCLSPERLLKRYPSLTSITINIL-KYGSYL---------WSHPF--HRDLPALDWIETVARGYP-KLAELKVSETRVTSKALDVLAT-SC-WSTLKTLRLVDCEGFKGADISELVKKCTNLEILDLEHSDFQ--G-QSDWPLDAARSCPNLKELSLIAPYK--RP-F-SEGMAASIAQLGLTGLRSLHMNSEYDL-------------ISTMQ---------IAA-TNS-NLEELRVGQCVRLERE--TGKSAALWGAEL---AR-ERVRSLRGLLALLSDPPSAHHIGIVLPIAPRLTCLDLSQT…
	Coleochaete_scutata_VQBJ2001142 CM-FSLLTDDL----IALVFGKLTTAADRNAASLVCRRWYRVEGETRESVRIPHCTAIDPCRVVERFPSMKSFTIQGS-PSC-D---------RVFLSD----DSSARPWIKMISLYYP-RLEEISLCRVRLTNSDLELLGD-AC-GATLRTVRLRECDNLTDAAIASLIIRCSCLEVLDLGQSEIR--A-LTR----SGRDHT-------------------AVSIEDVVHK--CSALKGLNLDMHDV-------------RENAEGIDT--IFSGLVS-QLPSGLESLQLGHLVPRVTL----------PKSL---KR-DNLAHLEGMGGHTASD---RRLPP--SVLKRLRFLDVTSANLIYPE…
	Klebsormidium_flaccidum_00434_0030 ??-??QFTDDV----LRHIFGRLSSPEAQAACAQTCKSWNRLEREARRVIHLNAAAGILPAQFQCSYPGADSAPVIVE-PDYKT---------FSL--E--SFGHSADPWLDVLGFK-V-SLTSLTLENVHVSHGALAAFLR-RR-GGTLRHLRLESVSGVDGAAMGLIAEHCHKLESLAVGLEL-G--S-SFSWATHFLLSFSGLQSIDLSSVEM--WFKD-GSRIFAAVAG--LPKLTTLKLPFAIGQ-------------QDLQS---------VLL-QVS-KLELFDAE-----------------------------------GFAQV-----APS-----------L-----------…
	Arabidopsis_thaliana_TIR1_AT3G62980 -I-ALSFPEEV----LEHVFSFIQLDKDRNSVSLVCKSWYEIERWCRRKVFIGNCYAVSPATVIRRFPKVRSVELKGK-PHFAD---------FNLVPD--GWGGYVYPWIEAMSSSYT-WLEEIRLKRMVVTDDCLELIAK-SF--KNFKVLVLSSCEGFSTDGLAAIAATCRNLKELDLRESDVD--DVSGHWLSHFPDTYTSLVSLNISCLA-S-EV-S-FSALERLVTR--CPNLKSLKLNRAVPL-------------EKLAT---------LLQ-RAP-QLEELGTGGYT--AEV--RPDVYSGLSVAL---SGCKELRCLSGFWDA-----VPAYLPAVYSVCSRLTTLNLSYAT-…
	Capsella_rubella_10016894m -L-ALSFPEEV----LEHVFSFIHLDKDRNSVSLVCKSWYEIERWCRRKVFIGNCYAVSPATVIRRFPKVRSVELKGK-PHFAD---------FNLVPE--GWGAYVYPWIEAMSSSYT-WLEEIRLKRMVVSDDCLELIAK-SF--KNFKVLVLSSCEGFSTDGLAAIAATCRNLKELDLRESDVD--DVSGHWLSHFPDTYTSLVSLNISCLA-S-EV-S-FSALERLVTR--CPNLKSLKLNRAVPL-------------EKLAT---------LLH-RAP-QLEELGTGGYT--AEV--RPDVYSGLSVAL---SGCKNLKCLSGFWDA-----VPAYLPAVYSVCSRLTTLNLSYAT-VQSYDLVKL…
	Brassica_rapa_Bra014378 -V-SLSFPEEV----LEHVFSFIHLDKDRNSVSLVCKSWYEIERWCRRKVFVGNCYAVSPGTVIRRFPKLRSVELKGK-PHFAD---------FNLVPE--GWGGYVYPWIEAMSTSYT-WLEEIRLKRMVVSDECLELIAK-SF--KNFKVLVLSSCEGFSTDGLAAIAASCRNLRELDLRESDVD--DVSGHWLSHFPDTYTSLVSLNISCLS-S-EL-S-FSALERLVTR--CPSLKSLKLNRAVPL-------------EKLAI---------LLQ-RAP-QLEEFGTGGYT--ADV--RPDVFSDLSVAL---SGCKKLKCLSGFWDA-----APAYLPAVYSVCCRVTTLNLSYAT-VQSYDLVKLLSQ…
	Brassica_rapa_Bra003518 -I-GLSFPEEV----LEHVFSFIHHDKDRNSVSLVCKSWYEIERWGRRRVFIGNCYAVSPATVIRRFPKVRSVELKGK-PHFAD---------FNLVPE--GWGGYVYPWIEAMSKAYT-WLEEIRLKRMVVSDECLELIAK-SF--KNFKVLVLSSCDGFSTDGLAAIASTCRNLKELDLRESDVD--DVSGHWLSHFPDTYTSLVSLNISCLA-S-DV-C-FSALERLVSR--CPNLKSLKLNRAVPL-------------EKLAT---------LLR-RAP-QLEELGTGGYS--ADV--RSDLFSDLYVAL---SGCKKLKCLSGLWDA-----APAYLPAVYSVCGRLTTLNLSYAT-VQSYDLVKLITL…
	Brassica_rapa_Bra007720 -V-ALSFPEEV----LEHVFSFIHVDKDRNSVSLVCKSWYEIERWCRRRVFIGNCYAVSPAAVIRRFPKARSVELKGK-PHFAD---------FNLVPE--GWGGYVYPWIEAMSASYT-WLEEIRVKRMVVSDECLELIAK-SF--KNFKVLVLSSCDGFSTDGLAAIASSCRNLKELDLRESDVD--DVSGHWLSHFPDTYTSLVSLNISCLV-S-EV-S-FSALERLVCR--SPNLKSLKLNRAVPL-------------EKLAA---------LLQ-RAP-QLEEFGTGVYS--AEV--RPDVLSGLSVAI---SGCKKLKWLSGFWDA-----LPAYLPAVYSVCSGLTTLNLSYAT-VQSYDLVKLLSQ…
	Cleome_hassleriana_27_119 -L-ALSFPEEV----LEHVFSFIQTDKDRNSVSLVCKSWYEIERWCRRKVFVGNCYAVGPATVIRRFPEVRSVELKGK-PHFAD---------FNLVPD--GWGAYVHPWIDAMSTAYM-WLEEIRLKRMVVTDECLEHIAK-SF--KNFKVLVLSSCEGFSTDGLAAIASNCRNLRELDLRESDVE--DVSGHWLSHFPDSYTSLVSLNISCLS-S-EV-S-FSALERLVSR--CPNLMSLRLNRSVPL-------------ERLAT---------LLQ-RAP-QLIELGTGAYT--AEV--RPDVFSSLSGAF---AGCKGLKSLSGFWDV-----DPAYLPAMYSACSRLTTLNLSYAT-VQSSDLVKLL…
	Cleome_hassleriana_8_51 -F-ALSFPEEV----LEHVFSFIQSDTDRNSVSLVCKSWYGIERWCRRKVFVGNCYAVGPATVIRRFPEVRSVELKGK-PHFAD---------FNLVPD--GWGGYVHPWVEAMSTSYT-WLEEIRLKRMVVTDECLELIAK-SF--KNFKVLVLSSCEGFSTDGLAAIAANCRNLRELDLRECDVE--DVSGHWLSHFPDSYTSLVSLNISCLS-S-EV-S-FSALERLVSR--CPNLKSLRLNRAVPL-------------ERLAT---------LLQ-RAP-QLVELGTGGYT--AEL--RPDVFSSLSAAF---SGCKGLKSLSGFWDA-----VPAYLPAIYSACSGLTTLNLSYAT-VQSSDLVKLLSQ…
	Gyrostemon_ramulosus_UAXP2017558 -M-ALSFPEEV----LEHVFSFIRSDKDRNAVSLVCKSWYEIERWCRRKVFVGNCYAVSPAAVIRRFPEVRSLELKGK-PHFAD---------FNLVPD--GWGGYVYPWIEAMSKA???????IRLKRMVVTDECLELIAK-SF--KNFKVLVLSSCEGFSTDGLAAIAAHCRSLRKLDLRESEVD--DVSGHWLSHFPDSYTSLVSLNISCLG-S-EV-S-FSALERLVSR--CPNLKSLRLNRAVPL-------------ERLAN---------LIK-RAP-QLVELGTGAYT--AEL--HPDVFSNLSRAF---SGCKALKSLSGFWDA-----VPAYLPAFYSVCSGLSTLNLSYAT-VQS…
	Arabidopsis_thaliana_AFB1_AT4G03190 ----LRFPPKV----LEHILSFIDSNEDRNSVSLVCKSWFETERKTRKRVFVGNCYAVSPAAVTRRFPEMRSLTLKGK-PHFAD---------YNLVPD--GWGGYAWPWIEAMAAKSS-SLEEIRMKRMVVTDECLEKIAA-SF--KDFKVLVLTSCEGFSTDGIAAIAATCRNLRVLELRECIVE--DLGGDWLSYFPESSTSLVSLDFSCLD-S-EV-K-ISDLERLVSR--SPNLKSLKLNPAVTL-------------DGLVS---------LLR-CAP-QLTELGTGSFA--AQL--KPEAFSKLSEAF---SNCKQLQSLSGLWDV-----LPEYLPALYSVCPGLTSLNLSYAT-…
	Capsella_rubella_10000550m ----LRLPSKV----LEHILSFIDSNEDRNSVSLVCKSWFETERKTRKRVFVGNCYAVSPAAVARRFPEMRSLTLKGK-PHFAD---------YNLVPD--GWGGYACPWVDALAAKSP-SLEEIRLKRMVVTDECLEKIAA-SF--KDFKVLVLTSCEGFSTDGIAAIASTCRNLRVLELRECIVE--DLGGDWLSYFPKTSTSLVSLDFSCLD-S-EV-K-ISDLERLVSR--SPNLKSLKLNPAVTL-------------DGLVS---------ILS-RAP-QLTELGTGSFA--AEL--KPEAFSKLSKAF---SNCKQLQSLSGLWDV-----LPEYLPALYSVCPGLISLNLSYAT-VRMPDLVEL…
	Brassica_rapa_Bra000842 ----LRLPSKV----LEHILSFVDSNEDRNSVSLVCKSWFETERRTRKRVIVRNCYAVTPEAVARRFPEMRSLTLKGK-PHFAD---------YNLVPD--GWGGYAWPWIEAMAVKCP-SLEELRLKRMVVTDECLEKIAA-SF--KDFKVLVLTSCEGFSTDGLAAIAVACSNLRELELRECIVE--DLGGDWLSYFPETLTSLVSLDFSCLD-S-EV-K-LSDLERLVSR--SPNLKSLKLNRAVSL-------------DALGS---------LLR-LAP-QLVELGTGSFS--DKL--DQEAVSKLSQAF---SEMKELKSLSGLWDV-----LPEYIPLLYSVCPGLTSLNLSYAT-VQMPNLVELLTR…
	Brassica_rapa_Bra034191 ----RRFPFKV----LEHIFSFVDSNEDRNSVSLVCKSWFETERRTRKRVFVGNCYAVSPLKVARRFPKMRSLTLKGK-PHFAD---------YNLVPD--GWGGYAWPWIEAMAARRP-LLEEIRLKRMVVTDECLEKIAA-SF--RDFKTLVLTSCEGFSTDGIAAIASTCRKLRDLELRECIVD--DLGGDWLSYFPETSTSLVSLDFSCLD-S-EV-K-LSDLERLLSR--SPNLKSLKLNRSVTL-------------DVLES---------LLR-RAP-QLVELGTGSFS--DEL--DPEEIAKLTKAL---SELKQLKSLSGLWDL-----LPEYIPLLYSVCPRLTSLNLSYAT-VQMPDLIDLLSR…
	Cleome_hassleriana_7_158 ----PSFPAKI----LEHIFSFVSSGEDRNAISAVCKSWYEIERQSRRRILVGNCYAVSPAAVTRRFPELRSASLKGK-PHFAD---------FNLVPD--GWGGHALPWIAAFAAAYP-WMEGIRMKRMVVTDECLEMIAE-SF--RDFKVLVLSSCEGFTTDGLAAIAASCSNLTELDVSESEVE--DLGGDWLSYFPDTCTSLVSLNFSCLE-S-EV-S-SSDLRRLVAR--SPNLKSLVLNRAVSL-------------DHLNE---------LLR-RAP-QLTELGTGSFS--AEL--QPHALSDLSEAF---SGCKDLKCLSGLWDV-----IPDYLPALYTVSSGLTSLNLSYAT-IRSHDLVKLLS…
	Gyrostemon_ramulosus_UAXP2022187 -M-DLSFPEEV----LEHVFSFIHSDKDRNVVSLVCKSWYEIERWSRRRVFIGNCYAVIPEAVTRRFPKVRSVELKGK-PHFAD---------FNLVPD--GWGGHVYPWIAAMSASYP-WLEEIRLKRMVVTDKSLELIAK-SF--RNFKVLVLSSCEGFSTDGLAAIAANCRNLRELDLRESEVD--DLSGYWLSHFPDTFTSLVSLNISCLG-S-EV-S-FSALERLVSR--CPNLKSLRLNQAVPL-------------EKLES---------LLR-RAP-QLVELGTGAYS--AEL--RPEVFSTLSGAF---SGCKELKSLSGLWDV-----APAYLPAVYSVCSGLTSLNLSYAT-VHS…
	Carica_papaya_9_171 -M-AVSFPEEV----LEHVFSFIRTDKDRNSISLVCKSWYEVERWCRRRIFVGNCYAVNPRMVIRRFPEVRSVELKGK-PHFAD---------FNLVPE--GWGGYVYPWILAMATAYP-WLEEIRLKRMVVTDESLELIAK-SF--KNFKVLVLCSCDGFSTDGLAAIAANCGNLKELDLRECDVD--DLSGHWLSQFPETCTSLVSINISCLS-S-EV-S-FSALDRLVGR--CPNLRTLRLNRAVPL-------------DRLAS---------LLR-RAP-QLVELGTGAYS--VDL--RPDVFTKLAGAF---SGCKKLKSLSGFWDV-----VPGYLPAVYSVCSGITSLNLSYAT-IQSPDLIKLVSQCPNL…
	Moringa_oleifera_CZPV2051068 -M-AISFPEDV----LEHVFSFIQSDKDRNALSLVCKSWYEIERWCRRRIFVGNCYAVSPRMVIRRFPDVRSVELKGK-PHFAD---------FNLVPD--GWGGYVYPWITAMATAYP-WLEEIRLKRMVVTDESLELIAK-SF--KNFKVLVLSSCEGFSTDGLAAIAANCRHLRELDLQESEVD--DLSGHWLSHFPDTFTSLASLNISCLL-S-EV-T-FSALERLVGR--CPNLRTLRLNRAVPL-------------DKLAS---------LLR-RAP-QLVEFGTGAYS--SEL--RPDDFSNLTGAF---SGCKELKSLSGFWDV-----VPGYLPAIYSVCSGLTSLNLSYAT-IQSTDLI…
	Tropaeolum_peregrinum_MYZV2004789 -M-EISFPEEV----LEHVFSFIKSDKDRNVISLVCKSWYEIERWCRRKVFIGNCYAVEPRRVIRRFPEVRSLELKGK-PHFAD---------FNLVPE--GWGGNACFWIKAMAEGYP-WLEEIRLKRMVVRDESLELIAK-SF--KNFKVLVLSTCEGFSTDGLAAIAANCRNLRDLDLRESEVD--DLSGHWLSHFPDSCTSLVSLNISCLS-S-DV-T-FSALERLVGR--CPNLKTLRLNRAVPL-------------DKLAS---------LLR-RAP-QLVELGTGAYT--TEL--GPDVFSNLEGAF---SCCKGLKDLSGFWDV-----AAPYLPAIYPICSGLTSLNLSYAT-IQ…
	Theobroma_cacao_1EG004541t1 -M-AYSFPDEV----LEHVFSFIQSDKDRNAVSMVCKSWYEIERWCRRKIFIGNCYAVSPRIMIRRFPEIRSVELKGK-PHFAD---------FNLVPE--GWGGYILPWIVEMAGAYP-WLEEIRLKRMVVTDESLELIAK-SF--KNFKVLVLSFCEGFSTDGLAAIAASCKNLKELDLRESEVD--DLSGHWLSHFPETYTSLVSLNISCLG-SDEV-S-FSALERLVGR--CPNLRTLQLNRAVPL-------------DKIAT---------ILR-RAP-QLVEFGTGTYA--AEL--RPDVFSNLAGAF---SSCKELRSLSGFWDV-----VPAYLPAIYSVCSRISSLNLSYAT-IQSHDLIK…
	Gossypium_raimondii_004G085900 -M-AFSFPDEV----LEHVFSFIQSDKDRNAVSMVCKSWYEIERWCRRKVFVGNCYAVSPRMVIRRFPEFRSIELKGK-PHFAD---------FNLVPD--GWGGYVSPWIEEMAGAYP-WLEEIRLKRMVVTDESLELIAK-SF--KNFKVLVLSSCEGFSTDGLAVIAASCKNLKELDLRDCEVD--DLSAHWLSHFPETYTSLVSLNISCLG-SDEV-S-FSALERLVGR--CTNLKTLRLNRAVPL-------------DKIAN---------ILR-HAP-QLVEFGTGTYT--ADV--RPDVYSDLAGVF---SSCKELKSLSGFWDV-----VPDYLPAIYPVCSKLTSLNLSYAT-IQSPD…
	Gossypium_raimondii_004G053500 -L-ASSLSDEV----LEHVFSFIQSDKDRNVVSAVCKSWYEIERWCRRKIFVGNCYAVSPKMVIRRFPQVRSIELKGK-PHFAD---------FNFVPD--GWGGYVLPWITEMAGAYP-WLDEIRLKRMVVTDESLELIAK-SF--KDFKVLVLASCEGFSTDGLAAIAASCKNLRELDLRESEVD--DSSVHWLSHFPETYTSMVSLNISCLG-SGEV-S-FSALERLVSR--CPNLRSLKLNRAVPL-------------DKTAN---------ILR-LAP-QLVEFSTCTYS--AEL--RSDVFSNLAGAF---SNCKELRSLSGFWDV-----VPDYLPAIYSVCSRLTSLNLSYAT-IQSPD…
	Gossypium_raimondii_007G131300 -M-AYSFPDEV----LKHVFSFIQSDKDRNAVSLVCKSWYEIERWCRRKVFIGNCYAVSPRMVIRRFPEVRSIELKGK-PHFAD---------FNLVPD--GWGGYVLQWIAEMAGAYP-WLGEIRLKRMVVTDESLELIAK-SF--KNFKVLVLFSCEGFSTDGLAAIAASCKNLRELDLRESEVD--DLSGHWLAQFPETCTSLVSLNISCLG-SDEV-S-FSALERLVDR--CPNLRSLQLNRAVTL-------------DKIAN---------ILR-RAP-QLVDFGTGNYA--AEL--QPDVFSNLAGAF---SSCKELKSLSGFWDV-----VPAYLPALYSICPRLTSLNLSYAT-IQSPD…
	Gossypium_raimondii_004G140500 -T-AYSFPDEI----LEHVFSFIQSDKDRNAASVVCKSWYEIERWCRRKVFVGNCYAVSPTMVIRRFPDIRSIELKGK-PHFAD---------FNLVPD--GWGGYVLPWISKMAGAYP-WLEEIRLKRMVVTDESLELVAK-SF--TNLQVLVLFSCEGFSTDGLAAIAAGCKNLRELDLRDSEVD--DLSGHWLNHFPDTYTSLVSLNISCLG-SDDV-S-FSALERLVGR--CPNLRRLLLNREVPL-------------DKIAN---------LLS-RAP-QLIEFGTGTYA--AEL--RSDVYSNLVEAF---CNCKELKSLSGFWDA-----VPAYLPVIYSVCSRLTSLNLSYAP-IQNPD…
	Fragaria_vesca_24947 -M-ASSFPEEV----LEHVFSFLQSDGDRNSISLVCKSWYEIERWCRRRIFVGNCYAVSPRIMIRRFPDVRSITLKGK-PHFAD---------FNLVPE--GWGGYVYPWIAAMASAYP-WLEEIRLKRMVVTDESLELIAK-SF--KNFKLLVLSSCEGFSTDGLASIAANCRNLRELDLHDSDVE--DLSGHWLSHFPDTYTSLVSLNIACLG-S-EV-S-FSALERLVGR--CPNLRSLRLNRAVPL-------------DKLSN---------LLN-RAP-QLDELGTGASS--AEL--RPDVLSNLSGAL---SACKELKSLSWFWDV-----VPTYLSAVYSICPGLTSLNLSYAI-IQSPDLIKLVSQCPN…
	Prunus_persica_ppa003344m -M-ANSFPEEV----LEHVFSFIQSDSDRNSISMVCKSWYEIERWCRRRIFIGNCYAVSPRMMIRRFPDIRSIELKGK-PHFAD---------FNLVPE--GWGGYVHPWIAAMADAYP-WLEEIKLKRMVVTDETLELIAK-SF--KNFKLLVLSSCEGFSTDGLAAIAANCRNLRELDLHESDVE--DLSGHWLSHFPDTYTSLVSLNIACLG-S-EF-S-FSSLERLVGR--CPNLKSLRLNRAVPL-------------DRLAN---------LLH-RAP-QLVELGTGAYS--AEL--RPDLFSNLAGSL---SGCKELESLSGFWDV-----VPAYLPAIYSICPGLTSLNLSYAT-IPSPDLIKLV…
	Cucumis_sativus_025170 -M-ASTFPEDV----LEHVFSFIQCHQDRNSISMVCKSWYEIERWCRKRVFVGNCYAVSPQIVIRRFPDVRSVELKGK-PHFAD---------FSLVPD--GWGGYVYPWILAMASAYP-LLEEIRLKRMVVTDESLELISK-SF--KNFKVLVLMTCEGFSTDGLAAIAANCRHLKVLDLRESDVE--DLNGHWLSHFPDTYTSLVSLNIACLV-S-EV-S-VSALERLVDR--CPNLRTLRLNRPVPL-------------DRHAN---------LLR-RAP-QLVEFGAGCYT--ADL--RSEVFSSLTGAF---TSCTELKSLSGFWDV-----VPAYLPSVYPTCSQLTSLNLSYAT-IQCDDLTKLVSQC…
	Citrus_sinensis_1g007912m -MSYSSLPEDV----LEHVFSFVQSDKDRNVISLVCKSWYEIERWCRRRIFVGNCYAVSPRMAIRRFPEVRSVELKGK-PHFAD---------FNLVPE--GWGGYVYPWIRAMAGGYP-WLEELKLKRMVVTDESLELIAK-SF--KNFKVLVLSSCEGFSTHGLAAIAADCKNLKELDLWESDVE--DPSGNWLSKFPDTCTSLVSLNIACLG-S-EV-S-FSALERLVVR--CPNLRTLRLNRAVPL-------------EKLAH---------LLR-QAP-QLVELGTGTYS--ADL--RPDIFSNLAGAF---SGCKELKSLSGFWDV-----VPAYLPAVYSVCSGLTTLNLSYAT-IQSPDLIKLV…
	Populus_trichocarpa_014G134800 ---ANSFPEEV----LQHVLSFITNDKDRNAVSLVCKSWYEIERWCRKRIFVGNCYAVRPEMVIRRFPELRSVELKGK-PHFAD---------FSLVPD--GWGGCVYPWIAALATAYP-WLEEIRLKRMVVSDESLKVIAK-SF--KNFKVLVLSSCEGFSTDGLAAVAANCRNLRGLDLRESEVD--DPSGQWLSRFPDSFTSLASLNISCLG-A-EV-S-FSALERLVGR--CPDLKTLRLNHAVPL-------------DKLAN---------LLR-GAP-QLVELGTGAYS--AEL--QPDVFSNLAGAF---SGCKELRSLSGFWNV-----FPGYLPAVYPVCSGLTSLNLRYAN-IQGAD…
	Populus_trichocarpa_002G207800 ---ASTFPEEV----LEHVLSFITNDKDRNAVSVVCKSWYEIERWCRKRIFVGNCYAVRPDMVIRRFPELRSVELKGK-PHFAD---------FNLVPD--GWGGYFYPWIAALATAYP-WLEEIRLKRMVISDESLEFIAK-SF--KNFKVLVLSSCEGFSTDGLSAIAADCRNLRELDLRESEVD--DPSGQWLNSFPDSFTSLVSLNISCLG-A-EL-S-FSALERLVGQ--CPDLKNLQLNHAVPV-------------ERLAK---------LIR-QAP-QLVELGTGEFS--AKL--QPEIFSNLAGAF---SVCKELRSLSGFWDV-----NPAYLPAVYPVCSGLTSLNLRYAN-IQSAD…
	Ricinus_communis_29647_m002022 -M-ASSFPEEV----LEHVLLFIQSDKDRNAVSMVCKSWYEIERWCRRRIFVGNCYAVSPTMVIRRFPDVRSIELKGK-PHFAD---------FNLVPE--GWGGYVFPWIVAMSSAYP-WLEEIRLKRMVVSDEALELISK-SF--KNFKVLVLSSCEGFSTGGLAAIAANCRNLRELDLRESEVD--DPSGHWLSHFPDSFTSLVSLNISCLG-S-EV-S-FSALKRLVGR--CPNLRTLRLNRAVPL-------------DRLAN---------ILR-RAP-QLVELGTGAYS--AEL--RPDVFSTLSGAF---SGCKELKSLSGFWDV-----VPGYLPAIYPICSGLTSLNLSYAT-IQSPD…
	Medicago_truncatula_1g088950 AL-SYSFPEEV----LEHVFSFIDSTKDRGSISLVCKSWYEIERWCRRRVFVGNCYAITPAMVIKRFPKVRSITLKGK-PHFAD---------FNLVPE--GWGGYVCPWIKAMAVAFP-CLEEIKLKRMVISDDCLDLIAK-SF--KNFKVLVLISCEGFTTDGLASIAANCRNLRELDLRESEVE--DICGHWLSHFPDSYTSLVSLNISCLA-N-EV-N-FPALERLVSR--CPNMHTLRLNRAAPL-------------DKLAN---------LLR-GAP-QLVELGTGAYT--SEM--RPEVFTNLAAAF---SGCKQMKGLSGFWDV-----LPSYLPAVYPVCSRLTSLNLSYAT-IQSPDLI…
	Eucalyptus_grandis_K03439 ----YSFPEEV----LEHVFSFIGSDRDRNAVSLVCKSWYEIERWCRRRVFVGNCYAVSPAAVVRRFPEVRSVELKGK-PHFAD---------FNLVPE--GWGGYVSPWITTLARAYP-WLEEIRLKRMVVTDESLELIAR-SF--KNFKVLVLSSCEGFSTDGLAAVAANCRNLRELDLRESEVE--DMSGHWLSHFPDSYTSLVSLNISCLG-S-EV-S-FSALERLVSR--CPDLRSLRLNRTVPL-------------DRLAN---------LLR-RAP-QLAELGTGVYS--AEL--RSDDFSNLVGAL---AGCRELRSLSGFWDV-----VPAYLPAVYPLCSGLTSLNLSYAT-IQSSELTKLI…
	Mimulus_guttatus_D00151 -----SFPEEV----LEHVFSFLKTDKDRNAVSLVCRSWYEIERWCRRRVFIGNCYSVSPEIVIRRFPEVRALEMKGK-PHFAD---------FNLVPE--GWGGYVYPWIVAMSVAYP-FLEEIKLKRMVVTDDTLELISK-SF--KNFKVLVLSSCEGFTTDGLASIAANCRNLRDLDLRESEVE--DLSGHWLSHFPDNCTSLVSLNMSCLG-S-EV-S-FSALERLVAR--SPNLKTLRLNRAVPL-------------EKLSN---------LLL-RAP-QLVELGTGAYS--AEV--RSDTFSNLTEAF---SACKHLKGLSGFWDV-----VPAYLPAMSSVCSGLTWLNLSYAT-IQSSDLIKLVTQ…
	Mimulus_guttatus_N01403 ----SLIPEEV----LEHVFSFLSSDRDRNSVSSVCKSWYEIERWCRRRIFIGNCYSVSAEMVTRRFPEVREVEIKGK-PHFAD---------FNLVPE--GWGGYVKPWIRVMSGAYP-LLEEMKLKRMVVTDECLDLISR-SF--NNFKVLVLTSCEGFTTHGLASIAANCRNLRELDLRESEVE--DLSGHWLSHFPDNCTSLVSLNISCLG-S-EV-S-FSALERLVTR--CPNLRTLRLNRAVPL-------------DKLPN---------LLQ-RAP-QLVELGTGACS--AEI--RSDIFSNLTEAF---LACKKLRALSGFWDV-----VPAYLPAMYPVCSGITSLNLSYAI-VQSPDLGKLVSQ…
	Solanum_lycopersicum_09g074520_2e -----SFPEEV----LEHVFSFLTTDKDRNAVSVVCKSWYEIERWCRRRIFVGNCYAVSPRIMIRRFPEVRSVELKGK-PHFAD---------FNLVPE--GWGAYVYPWILAMSRSYP-WLEEIKLKRMVITDESLELISK-SF--KNFKVLVLSSCDGFTTDGLAAIAANCRNLRKLDLGESEVE--DLSGHWLSHFPDNCTSLVSLNIACLA-S-EV-S-LLALERLVTR--SPNLTTLKINRAVPL-------------ERLPN---------LLR-RTS-QLVKFGTGVFS--ADV--RSDFFSNLTEAF---SSCKQLKCLSGFWDV-----VPAYLPALYPVCSRLTSLNLSYAT-CQ…
	Solanum_lycopersicum_06g008780 ????????????????????????????????????????????????????????????????????????????????????---------?????????????????????????????????????????????????????????????????????????????????NLRELDLGESEAK--DLSGHWLSHFPDSCTSLVSLNIACLA-S-VV-S-FSALERLVAR--SPYLRTLRLNRAVPI-------------EKLPK---------LLR-HAS-KLVDFGRRSYS--ADM--QSEVFINVSQAF---SGCNQLKGLSGFWDD-----VPAYFPTIYPVHSKLTSLNLSYAT-IQIPD…
	Daucus_carota_018358 -----SFPEEV----LEYVFSFINSDKDRNAVSLVCKSWYEIERWCRRRIFIGNCYAVTPGIMVRRFPEIRSVEIKGK-PHFAD---------FNLVPE--GWGGYVYPWVVAMSRAYP-WLEEIRLKRMVVSDECLELISK-SF--KNFKVLVMSSCEGFSTDGLASIVANCRNLKELDLRESEVE--DLSGHWLSHFPDTCTSLVSLNIACLA-S-EV-S-FSALERLVSR--CPNLKSLQLNRAVPL-------------EKLPN---------LLR-GAP-QLVELGTGAYS--AEL--RPELLSNLFDAF---TVCKELKGLSGFWDV-----VPAYLPAIYPVCNGLTSLNLSYAT-IQSPDISKLISQCQN…
	Daucus_carota_012425 -----SFPEEV----LEYVLSFIKTDKDRNAVSLVCKSWYEIERWCRRRVFIGNCYAVNPRIMIRRFPEIRSVEIKGK-PHFAD---------FNLVPE--GWGGYFHPWVVAMARAYP-MLEEIRLKRMVVSDDCLEMIAK-SF--KNFRVLVMSSCEGFSTDGLACIAANCRNLRELDLRESEVE--DLSGHWLSHFPDTCTSLESLNIACLG-S-EV-C-FSALERLVSR--CPNLRKLQLNRTVPL-------------EKLPN---------LLI-RAP-ELVEFGTGAYS--AEL--RPELLSNLVNAF---AGCKKLKALSGFWDV-----VPAYIPAIYPVCCGLTSLNLSYAN-IQSPDIIKLVSQCQN…
	Vitis_vinifera_GSVIVT01010995e ----YSFPEEV----LEHVFSFIHTDKDRNAISLVCKSWYEVERWSRRRIFIGNCYAVSPGIVIRRFPELRSVALKGK-PHFAD---------FNLVPD--GWGGNVYPWIAAMAMAYP-MLEELRLKRMVVTDESLELISR-SF--KNFKVLVLSSCEGFSTDGLAAIAANCRNLRELDLRESEVD--DFSGHWLTHFPDSCTSLVSLNISCLA-S-EV-S-FSALERLVGR--CPSLRTLRLNRAVPL-------------DRLPN---------LLR-RAP-QLVELGTGAYS--AEH--RPEVFSSLAGAF---SNCKELKSLSGFWDV-----VPDYLPAVYPACSGITSLNLSYAT-IQSPD…
	Tetrastigma_voinierianum_SZPD2013286 ----YSFPEEV----LEHVFSFIHTDKDRNAISVVCKSWYEVERWSRRRIFVGNCYAVSPGIVTRRFPELRSVALKGK-PHFAD---------FNLVPE--GWGGDVFPWIATMIRAYP-MLEELRLKRMVVTDESLELISR-SF--KNFKVLVLLSCEGFSTDGLAAIAANCRNLRELDLRESEVD--DLSGHWLTHFPDSCTSLVSLNISCLG-S-EV-S-FSALERLVGR--CPNLRTLRLNRAVPL-------------ERLPT---------LLL-RAP-QLVELGTGAYS--AEL--RPEVFSSLEGAF---ASCKELKSLSGFWDV-----VPDYLPSIYSICSGITSLNLSYAA…
	Vitis_vinifera_GSVIVT01021910e ----YSFPEEV----LEHVLSFIDSDSDRNSVSLVCKSWHDIERWCRRRLFVGNCYAVSPAIAIRRFPELRSVSLKGK-PHFAD---------FNLVPH--EWGGYAYPWIAAFAKAYP-WLEELRLKRMVVSDEALELIAK-KF--KNFRVLVMYSCEGFSTDGLATIAANCRNLKELDLSESEVD--DVSGNWLSQFPDSYTSLESLNITSLS-S-EI-R-FTALERLVGR--CPNLKTLKLSHSVPL-------------DLLPN---------LLQ-KAP-QLVELGSGLHT--KEV--HPDLYSKLAGAF---SGCKGLKRLCGLRDV-----VPSYLPTLYPICFGLTSLNLSDAP-IQCPE…
	Tetrastigma_voinierianum_SZPD2013507 ----YSFPEEV----LEHVLSFIDSDSDRNSVSLVCKSWHDIERWCRRRLFVGNCYAVSPAIAIRRFPELRSVSLKGK-PHFAD---------FNLVPH--EWGGYAYPWVAAFAEAYP-WLEELRLKRMVVSDEALELIGK-KF--KNFRVLVMYSCEGFSTDGLAAIAANCRHLKELDLSESEVD--DMSGNWLSQFPDSYTSLESLNITSLS-S-EI-R-FSALERLVGR--CPNLKTLKLNRSVPL-------------DLLPN---------LVQ-KTP-QLIELGSGLHT--TEV--HPELYSRLAGTF---SGFKGLKRLSGLGDA-----VPSYLPTLYPICSGLTSLNLSDAS…
	Aquilegia_coerulea_003_00856 ----NSFPEEV----LEHVFSFINSDKDRNSVSLVCKSWYGIERWCRNKIFVGNCYAVSPKIVIRRFPKLRSISLKGK-PHFAD---------FNLVPE--GWGGYVYPWIITMVEAYP-WLEELKLKRMVVTDESLELISK-SF--KNFKVLVLSSCEGFTTDGLGAIASNCRKLTTLDLRECEVD--DRRGHWLSQFSENCNSLVSLNIACLD-G-EV-N-FCALERLIGR--CTNLRSLRLNHAVPL-------------DKLPN---------ILR-RAP-QLVDLGTGAFS--SDV--RPDLYTKLAAAF---TGCKGLQSLSGFWEV-----IPSYLPAVYPLCGGLTSLNLSYAS-IQSHDLT…
	Aquilegia_coerulea_017_00312 LM-AFSFPQEV----LEHIFSFVQLDEDRNTISLVCKAWYEIDRWSRRKAFIGNCYALSPRILISRFPELRSISLKGK-PHFAD---------FNLVPE--GWGGFLYPWISTMVEAYP-WLEELRLKRMVVTDECLELISK-SF--KNFRVLVLTSCEGFSTDGLAAIAANCRNLRELDLRECEVD--DRSSHWLSHFSESCTSLASLNIACLG-G-EV-S-LSALERVVVQ--SKNLRTLRLNRSVPL-------------DKISS---------LLC-RAP-QLVDLGTGTFY--ADI--HPEVYSNLAGAF---AGCKELKSLSGFWEV-----FPAYLPVVYSICTRVTSLNLSYAT-IQSPDLI…
	Oryza_sativa_Os05g05800 PP-WHSLPDEV----WEHAFSFLPAAADRGAAAGACSSWLRAERRSRRRLAVANCYAAAPRDAVERFPSVRAAEVKGK-PHFAD---------FGLVPP--AWGAAAAPWIAAAADGWP-LLEELSFKRMVVTDECLEMIAA-SF--RNFQVLRLVSCDGFSTAGLAAIAAGCRHLRELDLQENEIE--DCSIHWLSLFPESFTSLVTLNFSCLE-G-EV-N-ITVLERLVTR--CHNLKTLKLNNAIPL-------------DKLAS---------LLH-KAP-QLVELGTGKFS--ADY--HSDLFAKLEAAF---GGCKSLRRLSGAWDA-----VPDYLPAFYCVCEGLTSLNLSYAT-VRGPELIKFISR…
	Zea_mays_GRZM2G135978 PP-WHALPDEV----WEHAFSFLPADSDRGAAACACHAWLRFERRSRRRLAVANCYAASPRDAVERFPAVRAVEVKGK-PHFAD---------FGLVPP--AWGADAAPWVAAAAAGWP-LLEEISFKRMVVTDDCLEMIAA-SF--RNFQVLRLVSCEGFSTAGLAAIAAACRNLRELDLQENEIE--DCSIHWLSLFPVSFTSLVTLNFSCLE-G-DV-N-ITVLEQLVTR--CSNLKTLKLNNAIPL-------------DKLAN---------LLR-KAP-QIVELGTGRFS--ADY--HPDLFSKLEAAF---AGCKSLRRLSGAWDA-----VPEYLPAFYCVCEGLTSLNLSYAT-VRGPELIKFISRCK…
	Phoenix_dactylifera_30s947241g003 ???????????----?????????????????????????????????????????????????????????????????????---------????????????????????MAEGWP-QLEELRLKRMVVTDDCLELIAR-SF--KNFRVLALSSCEGFSTAGLAAIAANCRNLRELDLQENEVE--DNCVHWLSHFPDSFTSLVNLNIACLE-G-EV-H-VSVLERLMSR--CTNLKTLKLNHAVPL-------------DRLVS---------LLR-RAP-QLADLGTGRFS--AEY--HPELFSKLESAF---AGCKSMRSLSGIWEA-----VPAYLPAIYSVCDGLTSLNLSYAT-IQ…
	Phoenix_dactylifera_30s894761g001e RW-AVMFPDEV----WEHIFSFVADDRDRNAVSLVCSGWYRIERRSRRRIFVGNCYAISPAAAVRRFPEVRAVSIKGK-PHFAD---------FNLVPS--DWGGGAEAWVAAMAEGWP-QLEELRLKRMVVTDDCFELIAR-SF--KNFRVLALSSCEGFSTAGLAAIAANCRNLRELDLRETGVE--ENCVHWLSHFPESFTSLVNLSIASIE-E-DV-N-ISVLEHLVSR--CTNLMTLKLNYAVPL-------------DRLVN---------LLR-RAP-QLASLGTGKFT--AEY--RPELFSKLESAF---AICKSMKSLSGICEA-----VPEYLPAIYPVCDGLTSLNLSYAL-V…
	Ananas_comosus_024729 PA-WAMFPDEV----WEQVFSFLGSDADRNAAFLVPRLGRRAERRSRRRVFVGNCYAVAPAAAVARFPEARAAAVKGK-PHFAD---------FNLVPG--DWGGGADAWVAAMAEGWP-LLEELRLKRMVVSDDCLEALAR-AF--KNLRVLALTSCDGFSTAGLAAIAAHCRNLRELDLQENMIE--ENCSHWLSHFPESFTSLVNLNIACLE-G-EV-N-VSVLERLVSR--CPNLKTLGLNQAFPL-------------DKLNI---------LLR-RAP-QLIDLGTGRFD--AEY--YPELFHKLESAF---SGCKSLRGLSGIWEA-----VPAHLPALYSICEGLTSLNLSYAT-IQSPDLIKLVSQCK…
	Ludovia_sp_VVVV2005570 ???????????----????????????????????????????????????????????????????????????KGK-PHFAD---------FNLVPA--DWGGSVEPWVAALAASCP-QLEEIRLKRMGVTDAALELIAR-SF--RNFKVLALASCEGFSTAGLAAIAAGCRNLRELDLHENEVE--DRSGHWLGCFPESFTSLVTFNIACLE-G-EV-N-LVALERLVTR--CTNLKTLRLNRAVPL-------------DRLAG---------LLH-SAP-QLVDLGTGKFS--ADF--RPELYTKLESAF---AGCKNLKSLSGIWEA-----VPAYLPAIYSVCSGLTSLNLSYST-LQGPELKKLVSRC…
	Aristolochia_elegans_PAWA2008587 LM-ATSFPDEV----LEHVFSFVDSDRDRNAISLVCKSWYRIERFCRRRIFVGNCYAVSPGIVIRRFPEVRSVALKGK-PHFAD---------FNLVPY--NWGGNVCEWIKEMAAAYP-WLEELRLKRMVVTDDSLELLSR-AF--NNFKVLVMVSCEGFSTNGLAAIASNCRNLRELDLQENDVE--DRSGQWLNCFPESFTSLVSLNIACLS-G-EV-S-FSALERLIAR--CPNLKNLGLNHDIPL-------------DKLAN---------LLR-RAP-QLVDLGTGSFS--GEP--RPQLYAKLASAF---EGCKELKSLSGFWLV-----TPTYLPALYPVCAGLTSLNMSYAA-VPS…
	Persea_borbonia_WIGA2018464 ----SSFPEEV----LEHVFSFVTSDKDRNAVSLVCKGWYRIERFCRRRIFVGNCYAVSPAIVTRRFPELRAVELKGK-PHFAD---------FNLVPY--DWGGGVLPWISAMAEAYP-RLEELRLKRMVVTDESLELLSR-AF--GNFRVLVMVSCEGFSTSGLAAVAANCRNLRVLDLQENYVE--DQSGYWLSHFPESCTSLEVLNLACLE-G-EV-N-SSVLERLVAR--CPNLRTLRLNQAVPL-------------EKLAN---------ILR-RAP-QLVDLGTGAFA--ADP--RQELYSKLANAF---EGSKSLKCLSGFWSV-----VPSYLPAIYSVCAGLTSLNLSYAT-IQSAELVN…
	Liriodendron_tulipifera_b3c6173 ----LIFPEEV----LEHIFSFIVSDKDRNAVSLVCKSWYQIERCCRHRIFIGNCYAASPRILIRRFPEIRSVSLKGK-PHFAD---------FNLVPY--DWGGSVGPWIEAMAEAYP-WLEELRLKRMVVTDDNLELLSR-AF--KNFRVLVLVSCEGFSTNGLAAVAANCRNLRELDLQENDVE--DCTGHWLSHFPESCTSLVSLNIACLD-G-EV-N-FSALERLVAR--SPNLKTLRLNQAVPL-------------DKLAN---------LLR-WAP-QLVDLGTGAFS--AEP--RPELYSKLTSAF---EGCKQLRSLSGFWSV-----VPTYLPAIYSICAGITSLNLSYAT-IQGP…
	Illicium_floridanum_VZCI2012927 -----SFPEEV----LEHVFSFIDSHKDRNSISLVCKSWFRVERWCRRRIFVGNCYAVSPEIVIRRFPKIRSVSLKGK-PHFAD---------FQLVPY--DWGGHVHPWIEAMAKAYP-WLEELRLKRMVVTDESLELLSQ-MF--QNFKVLVLTSCEGFSTDGLAAIAANCRNLRELDLQENDIE--DRGGHWLNLFPETCTSLVSLNFACIA-G-EV-G-FSVLERLVAR--SPNLKTLRLNHAVPL-------------DRLDN---------ILR-RAP-QLVDLGTGVFS--SEP--RPELYSRLAAAF---SGCKGLKSLSGFWEV-----VPAYLPAVYPVCAGLTSLNLSYAS-IQSP…
	Kadsura_heteroclite_NWMY2007440 ----ASFPEEV----LEHVFFFIHSHRDRNSVSLVCKSWFRVERWCRRRVFVGNCYSVSPEIVIRRFPRLRSVSLKGK-PHFAD---------FQLVPY--DWGGHVLPWIEAMAKAYP-WLEELRLKRMVVTDESLELLSQ-AF--QNFKILVLTSCEGFSTDGLAAIAANCRNLRELDLQENDIE--DRGGRWLNLFPEACTSLVSLNFACIA-G-EV-G-FSALERLVGR--SPNLKTLRLNHAVPL-------------DRLDN---------ILR-RAP-QLVDLGTGAFS--SEP--RPELYSRLAAAF---SGCKGLRSLSGFWEV-----VPAYLPAVHPICAGITSLNLSYAS-IQSP…
	Kadsura_heteroclite_NWMY2008760y2009751 -----SFPEEV----LEHVFSFIHSHRDRNNISLVCRSWLTVERWCRRRIFVGNCYAVSPEIVIRRFPKIRSVSLKGK-PHFAD---------FQLVPY--DWGGNVRPWIAAMATAYP-WLEELRLKRMVVTDESLELLSH-SF--QSFKVLVLTSCEGFSTDGLAAIATNCRNLRELDLQENDIE--DRGGQWLSHFPEACTTLVSLNFACVP-G-EV-A-LSVLERLVGR--CPNLKTLRLNSSVPL-------------ERLDN---------ILR-RAP-QLVDLGTGVFS--SEP--RPELYSRLAAAF---SGCKGLKSLSGFWEV-----VPSYLPSVYPVCAGLTYLNLS…
	Arabidopsis_thaliana_AFB2_AT3G26810 ----NYFPDEV----IEHVFDFVTSHKDRNAISLVCKSWYKIERYSRQKVFIGNCYAINPERLLRRFPCLKSLTLKGK-PHFAD---------FNLVPH--EWGGFVLPWIEALARSRV-GLEELRLKRMVVTDESLELLSR-SF--VNFKSLVLVSCEGFTTDGLASIAANCRHLRDLDLQENEID--DHRGQWLSCFPDTCTTLVTLNFACLE-G-ET-N-LVALERLVAR--SPNLKSLKLNRAVPL-------------DALAR---------LMA-CAP-QIVDLGVGSYE--NDP--DSESYLKLMAVI---KKCTSLRSLSGFLEA-----APHCLSAFHPICHNLTSLNLSYAAE…
	Capsella_rubella_10016928m ----NYFPDEV----IEHVFDFVTSHKDRNAISLVCKSWYKIERYSRQRVFIGNCYATNPERLLRRFPCLKSLTLKGK-PHFAD---------FNLVPH--EWGGFVQPWIEALARSRV-GLEELRLKRMVVTDESLELLSR-SF--VNFKSLVLVSCEGFTTDGLASIAANCRHLRDLDLQENEIE--DHRGQWLSCFPDTCTTLVTLNFACLE-G-ET-N-LVALERLVAR--SPNLKSLKLNRAVPL-------------DALAR---------LMA-CAP-QIVDLGVGSYE--NDP--DSESYLKLKAAI---KKCTSLRSLSGFLEA-----APHCLSAFHPICHNLTSLNLSYAAEIHGSHLIKL…
	Brassica_rapa_Bra032954 ----NYFPDEV----IEHVFDFVTSHKDRNSISLVCKSWFKIERYSRQNVFIGNCYAINPERLLRRFPCFKSLTLKGK-PHFAD---------FNLVPH--GWGGFVQPWIEALARSRV-GLEELRLKRMVVTDESLELLSR-SF--VNFKSLVLVSCEGFSTDGLASIASNCRHLQDLDLQENEID--DHRGQWLSCFPETYTSLVTLNFACLE-G-ET-N-LVALERLVAR--SPNLRSLKLNRAVPL-------------DALAR---------LMA-CAP-QIVDLGVGSYE--DEQ--DSESCLKLQAAI---RKCTSLRSLSGFLEA-----APHCLSAFHPVCHNLTSLNLSYAAEIHGSHLIKLIEH…
	Arabidopsis_thaliana_AFB3_AT1G12820 ----NYFPDEV----IEHVFDFVASHKDRNSISLVCKSWHKIERFSRKEVFIGNCYAINPERLIRRFPCLKSLTLKGK-PHFAD---------FNLVPH--EWGGFVHPWIEALARSRV-GLEELRLKRMVVTDESLDLLSR-SF--ANFKSLVLVSCEGFTTDGLASIAANCRHLRELDLQENEID--DHRGQWLNCFPDSCTTLMSLNFACLK-G-ET-N-VAALERLVAR--SPNLKSLKLNRAVPL-------------DALAR---------LMS-CAP-QLVDLGVGSYE--NEP--DPESFAKLMTAI---KKYTSLRSLSGFLEV-----APLCLPAFYPICQNLISLNLSYAAE…
	Capsella_rubella_10012250m ----NYFPDEV----IEHVFDFIASHRDRNSISLVCKSWHKIERFSRKQVFIGNCYAINPERLIGRFPCLKSLTLKGK-PHFAD---------FNLVPY--EWGGFVLPWIEALARSRV-GLEELRLKRMVVTDESLELLSR-SF--ANFKSLVLVSCEGFTTDGLASIAANCRHLRELDLQENEID--DHRGQWLNCFPDSCTTLTSLNFACLK-G-ET-N-VAALERLVAR--SPNLKSLKLNRAVPL-------------EALAR---------LMS-CAP-QLLDLGVGSYE--NEP--DPESFTKLMAAI---KKCTSLRSLSGFLEV-----APLCLPAFYPICQNLISLNLSYAAEIQGNHLIKL…
	Brassica_rapa_Bra016754 ----NYFPDEV----IEHIFDFIPSHRDRNSISLVSKSWHKIERYSRHQVFIGNCYAISPERLIRRFPCLRSLTLKGK-PHFAD---------FNLVPH--EWGGFLHPWIDALSKARV-GLEELRLKRMVVSDESLELLSR-SF--VGFKSLVLVSCDGFTTDGLASIAANCRHLRELDLQENEID--DHRGQWLNCFPDSSTTLVSLNFACLK-G-ET-N-LSALERLVAR--SPNLKSLKVNRAVPL-------------DALTR---------LMS-CAP-QLVDLGVGCYE--NEA--EPESFEKLMAAI---KKCTLLRSLSGFSEV-----APVCLTAFYPICENLTSLNLSYAAEIQGNHLIEFVQF…
	Brassica_rapa_Bra026953 ----NYFPDEV----IEHIFDFISSHKDRNSISLVSKSWHKIERCSRKRVFIGNCYAINPERLIQRFPSLRSLTLKGK-PHFAD---------FNLVPH--EWGGFVHPWIVALAKARV-GLEELRLKRMVVSDESLELLSR-SF--SSFKSLVLVSCEGFTTDGLASVAANCRHLRELDLQENEID--DHRGQWLNCFPESSTALTSLNFSCLK-G-ET-N-LAALERLVAR--SPNLESLKVNRAVPL-------------DALTR---------LMS-CAP-QLVDLGVGSYE--NEP--DQESFMKLMAAI---KKCTELRSLSGFSEV-----APLCLTAFYPICQNLTSLNLSYAAEIQGNHLIRFIQF…
	Cleome_hassleriana_11_48 ----NYFPDEV----IEHVFDFITSHRDRNAISLVCKSWYKIERYSRQKVFIGNCYAINPERLIRRFPCLKSLTLKGK-PHFAD---------FNLVPH--DWGGFVHPWIEALARSRV-GLEELRLKRMVVSDESLELLSR-SF--ANFKSLVLISCEGFTTDGLAAIAANCRHLRELDLQENEVD--DHRGQWLSCFPDSFTSLVSLNFACLK-G-DI-N-LAALERLVAR--SPDLKTLKLNRAIPL-------------DALAR---------IMM-SAP-QLVDLGVGSYV--NDP--ASESYANLKAAI---RKCVSLRSLSGFLES-----APLCLPAFHPICHNLISLNLSYAAEIHGSYLIKLIQ…
	Cleome_hassleriana_4_223 ----NYFPDEV----IEHVFDFITSHRDRNAISTVCKSWHKIERYSRRKVFIGNCYAINPERVIRRFPCLKSLVLKGK-PHFAD---------FNLVPH--DWGGFVHPWIEALARSRV-GLEELRLKRMVVSDESLELLSR-SF--VNFKSLVLVSCEGFTTDGLAAIAANCRHLRELDLHENEVD--DNRGQWLSCFPDSSTSLTSLNFACLK-G-DI-N-LSALERLVAR--SPNLKSLKLNRAVPL-------------DALAR---------IMT-SAP-QLMDLGVGSYV--NDP--TSDSYAKLKTAI---RKFTSLRSLSGFLEA-----SPRCLSGFHPICHNLVSLNLSYTAEIHGSYLVKLIQ…
	Gyrostemon_ramulosus_UAXP2001314 ----NYFPDEV----IEHIFDFITSHTDRNAISVVCKSWYKIERCSRHKVFIGNCYVINPERMIRRFPCLKSLTLKGK-PHFAD---------FNLVPH--DWGGFLQPWIEALARNRV-GLEELRLKRMVVSDESLELLSR-SF--ANFKSLVLVSCDGFTTDGLAAIASNCRHLRELDLQENEIE--DHRGQWLSCFPDSSTSLVSLNFACLK-G-EI-N-LAALERLVAR--SPNLKSLKLNRTVPL-------------ESLTR---------ILT-RAP-QLVDLGVGSLV--HDS--DSESFAKLKAAI---EKCKSIRGLSGFLEV-----IPRCLSAFHSVCQNIVSLNLSYAPGIYG…
	Carica_papaya_70_88e ----NYFPDEV----LEHVFDFITAHRDRNSVSLVCKSWYKIERYSRQKVFIGNCYAINPERLIQRFPGLKSLTLKGK-PHFAD---------FNLVPH--DWGGFVYPWIAALARSRV-GLEELRLKRMVVTDESLELLSR-AF--ANFKSLVLVSCEGFTTDGLAAIAANCRFLKELDLQENEVE--DHCGQWLNCFPDSCTSLVSLNFACLK-G-DI-N-LTVLERLVAR--SPNLKSLRLSRAVPL-------------DVLQR---------ILL-RAP-QLVDLGTGSYV--HDP--TSEAFTKVKAAF---QKCESIRSLSGFLEV-----TPRCLLAVHPICPNLTSLNLSYAPGIHGNDLIKLIQHCKK…
	Moringa_oleifera_CZPV2051073 ----NYFPDEV----LEHVFDFITSHRDRNTVSLVCKSWYKIERYSRQKVFIGNCYAINPERLIRRFPGLKSLTLKGK-PHFAD---------FNLVPH--DWGGFVYPWIKALARSRV-GLEELRLKRMVVSDESLELLSR-SF--ANFKSLVLVSCEGFTTDGLAAIAANCRYLRELDLQENEVE--DHRGQWLSCFPDSCTSLVSLNFACLK-G-EI-N-LTALERLVAR--SPNLKSLRLNRAVPL-------------DTLQK---------ILM-RAP-QLVDLGTGSYV--HDP--TSETYSKLRIAI---QKCNSIRSLSGFLEV-----APRCLAAVHPVCPNLTSLNLSYAPGIPGDELI…
	Tropaeolum_peregrinum_MYZV2009647 ----NYFPDEV----LEQIFDSVTSHRDRNAVSLVCKSWYRIERYSRRKVFIGNCYAINPERVISRFPGLKSLVLKGK-PHFAD---------FNLVPH--DWGGHVYPWIEALASSQV-GLEELRLKRMVVSDDSLELLSR-SF--VNFKSLLLLSCDGFTTDGLAAIAANCRHLKELDLQENEID--DYRGQWLSCFPDSATSLVSLNFACLK-G-DI-N-LPALERLVGR--SPHLESLRLNRAVPL-------------ETLQK---------ILI-QAP-QLVDLGAGAYV--QDP--TSEAYRKLKSAI---QKCKSIRSLSGFLEV-----SPRCLPAIYPICSNLTALNLSYAPGIY…
	Tropaeolum_peregrinum_MYZV2009648 ----NYFPDEV----LEQIFDSVTSHRDRNAVSLVCKSWYRIERYSRRKVFIGNCYAINPERVISRFPGLKSLVLKGK-PHFAD---------FNLVPH--DWGGHVYPWIEALASSQV-GLEELRLKRMVVSDDSLELLSR-SF--VNFKSLLLLSCDGFTTDGLAAIAANCRHLKELDLQENEIE--DLRGQWISCFPESSTSLVSLNFACLK-G-DI-N-LTALERLVGR--SPHLKSLRVNRAVPL-------------ETLQK---------ILM-QAP-QLVDLGTGSYV--HDT--NSDVFKKFKAAI---QKCKSIKSLSGFLEI-----APRCLSAIYPICSNLTALNLSYAPSFY…
	Populus_trichocarpa_017G061600 ----NYFPDEV----LEHIFDFVTSQRDRNSVSQVCKPWYKIESSSRQKVFVGNCYAISPQRVIERFPGLKSITLKGK-PHFAD---------FNLVPN--DWGGFVYPWIEAFARNSV-GLEELKLKRMIISDECLELISR-SF--PNFKSLVLVSCEGFTADGLAAIASNCRFLRELDLQENDVE--DHRGHWLSCFPDTCTSLVSLNFACLK-G-EV-N-VAALERLIAR--SPNLRSLRLNHAVPL-------------DVLQK---------ILI-RAP-HLVDLGVGSYV--NDP--DSETYNKLVMAI---QKCMSVKSLSGFLEV-----APHCLSAFHLICPNLTSLNLSYAPGIHGAE…
	Populus_trichocarpa_001G323100 ----NYFPDEV----LEHIFDFVTSQRDRNSVSQVCKPWYKIESTSRQKVFVGNCYAISPERVIERFPGLKSITLKGK-PHFAD---------FNLVPH--DWGGFVYPWIEAFARNNM-GLEELKLKRMIISDECLELISR-SF--ANFKSLVLVSCEGFSTDGLAAIASNCRFLRELDLQENDVE--DHRGHWLSFFPDTCTSLVSLNFACLK-G-DV-N-LAALERLVAR--SPNLRSLRLNHAVPL-------------DILQK---------ILM-RAP-HLVDLGVGSYV--HDP--DSETYNKLVTAL---QKCKSVKSLSGFLEA-----APQCLSAFHLICPNLTSLNLSYAPGIHGTE…
	Ricinus_communis_30131_m006863 ----NYFPDEV----LEHVFDFVTSHRDRNSVSQVCKSWYRIESCSRRKVFIGNCYAISPERVIERFPDLKSITLKGK-PHFAD---------FNLVPH--DWGGYVYPWIEAFARHRV-GLEELRLKRMVVSDESLELLSR-SF--LNFKSLVLVSCEGFTTDGLASVAANCRYIRELDLQENEVE--DHRGHWLSCFPDSSTCLTSLNFACLK-G-DI-N-LGVLERLVAR--SPNLRSLRLNRAVPL-------------DTLQK---------ILM-QAP-QLVDLGVGSYV--HDP--DSETYSKLVAAV---QKCKSVRSLSGFLDV-----APHCLPAFHLMCPNLTSLNLSYAPGIQGSE…
	Gossypium_raimondii_007G072400 ----NYFPDEV----LEHVFDFITSHKDRNSVSLVCKSWYKIERYSRQRVFIGNCYSISPERLIARFPGLKSLTLKGK-PHFAD---------FNLVPH--DWGGFVYPWIKALAKSRI-GLEELRLKRMVVSDESLELLSK-SF--VNFKSLVLVSCEGFTTDGLAAIAANCRFLRELDLQENEVD--DHRGHWLSCFPESCTSLISLNFACLR-G-EV-N-LGALERLVSR--SPNLKSLRLNRAVPL-------------DTLQK---------LLM-RAP-QLVDLGIGSYV--HDP--FSEVYNKLKIAI---QRCKSIRSLSGFLEV-----APHCMSAIYPICGNLTFLNLSYAPGLHGNK…
	Gossypium_raimondii_001G273700 ----NYFPDEV----VEHVFDFITSHKDRNSVSLVCKSWYKIERYSRQRVFIGNCYSITPQRLIARFPGLKSLTLKGK-PHFAD---------FNLVPH--DWGGFVDPWIKALAKSRI-GLEELRLKRMVVSDDSLELLSR-SF--PNFKSLVLVSCEGFTTDGVAAIAANCRFLRELDLQENEVE--DHRGHWLSCFPESCTSLVSLNFACLK-G-EI-N-LASLERLVAR--SPNLKSLRLNRVVPL-------------DTLQK---------LLM-RAP-QLVDLGIGSYV--DDP--SSEVFSKLKAVI---QLCNSIRSLSGFLEV-----APCCMSAIYPICENLTFLNLSYAPGLQGND…
	Theobroma_cacao_1EG017309t1 ----NYFPDEV----LEHVFDFISSHKDRNSVSLVCKSWYKIERFSRQRVFIGNCYSISPDRLIARFPGLKSLTLKGK-PHFAD---------FNLVPH--DWGGFLDPWIRALAKSRI-GLEELRLKRMVVSDESLELLSK-SF--LNFKSLVLVSCEGFTTDGIAAIAANCRFLRELDLQENEVD--DHRGHWLSCFPESCTSLVSLNFACLK-G-EI-N-LGALERLVVR--SPNLKSLRLNRAVPL-------------DTLQK---------ILM-RAP-QVVDLGTGSYV--HDP--SSEVYNKLKSAF---QRCKSIRSLSGFLEV-----APRCMSAIYPICTNLTFLNLSYAPGLHGNELTK…
	Citrus_sinensis_1g008325m ----NYFPDEV----IEHVFDFVTSQKDRNAVSLVCKSWYKIERLSRQSVFIGNCYAISPERVIGRFPGLKSLTLKGK-PHFAD---------FNLLPY--DWGGWVYPWVEALAKSRV-GLEELRLKRMVVSDDCLELLSR-SF--VNFKSLVLVSCEGFTTDGLAAIAANCRYLRELDLQEIEVD--DNRGQWISCFPDSCTSLVSLNFSCLK-G-EI-N-LTALERLVAR--SPNLKSLRLNRAVPL-------------DTLQK---------LLM-RAP-QLVDLGIGSFV--YDP--SSEAYIKLKATL---VKCKSIRSLSGFLEV-----VPCCLSAIHPVCQNLTSLNLSYAPGIHGNELIKLI…
	Medicago_truncatula_7g083610 ----NYFPDEV----IEHVFDYVVSHSDRNSLSLVCKSWYRIERFTRQRVFIGNCYSISPERLVERFPDLKSLTLKGK-PHFAD---------FSLVPH--GWGGFVYPWIEALAKNKV-GLEELRLKRMVVSDESLELLSR-SF--VNFKSLVLVSCEGFTTDGLAAVAANCRSLRELDLQENEVE--DHKGQWLSCFPESCTSLVSLNFACLK-G-DI-N-LGALERLVSR--SPNLKSLRLNRSVPV-------------DALQR---------ILT-RAP-QLMDLGIGSFF--HDL--NSDAYAMFKATI---LKCKSITSLSGFLEV-----APFSLAAIYPICQNLTSLNLSYAAGILGIELI…
	Fragaria_vesca_01376 ----NYFPDEV----IEHIFDFVTKQRDRNAVSLVCKSWYKIERFSRERVVIGNCYAISPERVIARFPGLKSLTLKGK-PHFAD---------FNLVPH--DWGGSVDPWIDALAESRV-GLEELRLKRMVVSDESLDLLSR-SF--LNFKSLVLVSCEGFTTDGLAAIAAHCRFLRELDLQENDID--DHRGHWLSCFPDSCTSLVSLNFACLK-G-EI-N-LAALVRLVAR--SPNLKVLRVNRAVPL-------------DTLQK---------VLM-RAP-QLVDLGTGSYV--LEP--DSESYRKLKATI---LKCKSIQSLSGFLEG-----APHSLPAFYPICLTLTSLNLSYAPGVHGTDLIKLIRQCGR…
	Prunus_persica_ppa003465m ----NYFPDEV----IEHIFDSVTSHKDRNAVSLVCKSWYRIERFSRERVFIGNCYAISPERVIERFPGLKSLTLKGK-PHFAD---------FNLVPH--DWGGFLQPWVEALVDSRV-GLEELRLKRMVVSDESLELLSR-SF--LNFKSLVLVSCEGFTTDGLAAIAANCRFLKELDLQENDID--DHRGQWLSCFPENCTSLVSLNFACLK-G-EI-N-LAALERLVAR--SPDLKVLRLNRAVPP-------------DTLQK---------VLM-RAP-QLVDLGTGSYV--LDP--DSETYNKLKATI---LKCKSIKSLSGFLEV-----APRCLPAFYPICSNLTSLNLSYAPGVHGSELIKII…
	Eucalyptus_grandis_G01952 ----NYFPDEV----IDHVFDFVTSNRDRNVISLVCKSWYRIERLSRQRVFIGNCYAISPERLIARFPGVRSLTLKGK-PHFAD---------FNLVPP--DWGGFVYPWIDALARSKV-NLEELRLKRMVVTDDGLELISR-SF--VNFKSLVLVSCEGFTTDGLAAIAANCRFLRELDLQENEVE--DHRGQWLNCFPDSCTSLVSLNFACLK-G-DI-N-LAALERLVAR--SPYLKSLRLSRAVPL-------------DTLQK---------ILV-RAP-QLVDLGVGSFV--HDP--DSETYNKLVTAI---EKCKSMRSLSGFLEV-----SAYCLPAIYPICSGLTSLNLSYAPGIPGSELTKLI…
	Cucumis_sativus_156100 ----NYFPDEV----LEHVFDYVTSHRDRNAVSLVCKLWYRVDRFSRQKVFVGNCYSITPERVIGRFPCVKSLTLKGK-PHFAD---------FNLVPH--DWGGYVYPWIQAFAKRRI-SLEELRLKRMVVTDDSLELLSR-SF--PNFKSLLLFSCEGFTTNGLAAIAANCRFLRELDLQENEID--DHSNYWLSCFPESCTSLVSLNFACLR-G-EV-N-LGALERLVAR--SPNLKSLRLNRAVPI-------------ETLQN---------ILA-HAP-QLVDLGTGSYD--HDR--DSEIYENIKNTL---LKCKSIRSLSGFLDV-----SPCCLASIYPICSNLTSLNLSYAPGLHGNELIKVIQYC…
	Mimulus_guttatus_F00020 -M-MSYFPEEV----LEHVFDFLTSHRDRNAVSLVCKSWYSLERFSREKVFIGNCYAVNPERLIARFPRVRSLTLKGK-PHFAD---------FNLVPH--DWGGDVYPWIEAMTKNGI-NLEELRLKRMLVSDESLELLAK-SF--PNFKSLVLVSCEGFTTDGLAAIASNCRFLRELDLQENEVD--DRKGHWLSCFPDSCTSLVSLNFACLK-G-EV-N-VAALERLVAR--CHNLRSLRVNHAVPL-------------EALQK---------ILV-KAP-QINDLGTGSFV--HDP--DSETSKKMKNTL---ENCKSVRSLSGFLDV-----NPHCLPAVYPICTDLTSLNLSYAPGIYSNELIKLICH…
	Mimulus_guttatus_K01481 ----NYIPEEV----LEHVFDFITSHRDRNAVSLVCKSWYSVERFSRDKVFIGNCYSISPERLIARFPRLRSLTLKGK-PHFAD---------FNLVPH--DWGGHVYPWIDAMAKSGI-NLEELRLKRMVVTDESLELLAK-SF--PTFRSLVLVSCEGFTTDGLAAIASGCRFLRELDLQENEVD--DRKGQWLSCFPDTCTSLVSLNFACLK-G-EV-N-VSALERLVGR--CPNLTSLRLNHTVPL-------------DALHK---------ILA-RAP-QLNDLGTGSFV--HDP--DSESCNKLKNVL---RMCTSIRSLSGFLDV-----NGRSLPSIYPICTNLTSLNLSYAPGIYSNELIKLICH…
	Daucus_carota_016627 -A-INYFPEEV----LELIFNLLTTHGDRNAVSLVCKSWYSVERNSRERVFIGNCYAISPERMIGRFPRVRSLTLKGK-PHFAD---------FNLVPP--DWGGSVFPWIEAMVKSGV-NLEELKLKRMVVSDDSLELLAR-SF--VNFKSLVLVSCEGFSTDGLAAIASNCRHLRELDLQENEVE--DHRGQWLSCFPESCTSLVSLNFACLR-G-EV-N-LPALDRLVAR--CRNLVSLKLNHAVPV-------------DALQK---------ILV-QAP-QLQELGAGSYV--HDP--DSETCKKLKNTI---QNCTSIRSLSGFLDV-----APRCLPTVYPVCVNLTSLNLSYAPGIYCKDLIKLIRHCKR…
	Tetrastigma_voinierianum_SZPD2013284 ----NYFPDEV----LEHVFDFLTSHRDRNAVSLVCRSWYKVEKWSRHRVFVGNCYAISPERLIARFPRVRALTLKGK-PHFAD---------FNLVPH--DWGGFVYPWIQVMAKSNI-GLEELRLKRMVVSNESLELLAR-SF--VNFKSLVLVSCEGFTTDGLAAVAANCRFLRELDLQENEVE--DRKGQWLSCFPDSCTSLVSLNFACLK-G-EV-N-LTALERLVAR--CPNLMSLRLNRAVPL-------------EALQR---------ILM-HAP-QLVDLGTGSFD--HDP--DTETYRKLISTL---QKCKSIRSMSGFLEV-----GPPCLPSIYLICSNLTSLNLSYAP…
	Tetrastigma_voinierianum_SZPD2013285 ----NYFPDEV----LEHVFDFLTSHRDRNAVSLVCRSWYKVEKWSRHRVFVGNCYAISPERLIARFPRVRALTLKGK-PHFAD---------FNLVPH--DWGGFVYPWIQVMAKSNI-GLEELRLKRMVVSNESLELLAR-SF--VNFKSLVLVSCEGFTTDGLAAVAANCRFLRELDLQENEVE--DRKGQWLSCFPDSCTSLVSLNFACLK-G-EV-N-LTALERLVAR--CPNLMSLRLNRAVPL-------------EALQR---------ILM-HAP-QLVDLGTGSFD--HDP--DTETYRKLISTL---QKCKSIRSMSGFLEV-----GPPCLPSIYLICSNLTSLNLSYAP…
	Vitis_vinifera_GSVIVT01033011e ----NYFPDEV----LEHVFDFLTSHRDRNTVSLVCKSWFKVEKWSRRRVFVGNCYAISPERLIARFPRVRALTLKGK-PHFAD---------FNLVPP--DWGGFVYPWIEAMAKSNI-GLEELRLKRMVVSNEGLELLAR-SF--VNFKSLVLVSCEGFTTDGLAAVAANCRFLRELDLQENEVE--DRKGQWLSCFPDSCTSLVSLNFACLK-G-EV-N-LTALERLVAR--CPNLKSLRLNRAVPL-------------DALQR---------ILM-HAP-QLVDLGTGSYV--HDP--DAETVNKLISTF---QKCKSIRSMSGFLEV-----APLCLPAIYPICSNLTSLNLSYAPGIHGDE…
	Vitis_vinifera_GSVIVT01000962e -----YFPAEV----LERIFALLTSQRDRNSVCLVCKYWWKVEAGCRLRVSVKNCYALGPNRVLARFPRMRALSLKGK-PHFAG---------LNMV----NWGGFALPWIEFFAKNCP-WLQELRLKRMVVSDQSLQMISL-SF--SEFESLSLIRCGGFSPVGLAAIASNCRYRQNCHILGVGVG--DGIGQWLSCFPESCSSLVSLNFACTK-G-VV-N-LEALEKLVAR--CPNLRSLRLNRRVPP-------------NVLQR---------LLQ-QAP-QLEDLGIGSFS--NYT--DRRTYLRLQNAV---SKCRSIRSLSGFSSF-----TPLYQAAIYPMCSNLISLNLSKAVELPAHS…
	Tetrastigma_voinierianum_SZPD2013392 -----FFPAEV----LERVFALLTSQRDRNSVCLVCKYWWKVEAECRLRVFVKNSYALGPQRVLSRFPRLRALSLKGK-PHFAD---------LNLV----NWGGFALPWIEFFAKNCP-W-QELRLKRMVVSDQTLQLISV-SF--SEFESLSLVRCGGFSPVGLAAIASNCRCLKELVLLENEVG--DGLGQWLSSFPESCSSLVSLNFACTK-G-LV-N-LEALEKLVAR--CPNLRSLRLNPRVPP-------------NTLHK---------LLL-QAP-QLEDLGIASFS--NTT--DHRTCMRLQNAV---SKCQSIRSLSGFSSF-----SPISLAPIYPMCSNMVSLNLSKAV…
	Aquilegia_coerulea_100_00013 ----TYFPEEV----LEYIFDFITTNQDRNSISLVCKSWFIVEKGSRKRVFIGNCYAITPERLISRFPRVKALTLKGK-PHFAD---------FNLIPH--DWGGFLLPWIEAMAISYP-GLEELRLKRMVVTDESLELLSR-SF--ANFKSLVLVTCEGFTTDGLAAIAANCRVLRELVLYENDVE--DGRGHWLSCFPENYTSLVSLDFACLK-G-EV-N-LASLEKLVAR--CPNLKSLKLNRAVPL-------------QTLHK---------ILI-RAP-QLMDLGIGSLV--HHR--DPILYNHLREVV---RQCKSVRSLSGCFEV-----SLYFLSPFYPVCKNLTSLNLSYAPGIPGSDLI…
	Oryza_sativa_Os04g32460 ----TYFPEEV----VEHIFSFLPAQRDRNTVSLVCKVWYEIERLSRRGVFVGNCYAVRAGRVAARFPNVRALTVKGK-PHFAD---------FNLVPP--DWGGYAGPWIEAAARGCH-GLEELRMKRMVVSDESLELLAR-SF--PRFRALVLISCEGFSTDGLAAVASHCKLLRELDLQENEVE--DRGPRWLSCFPDSCTSLVSLNFACIK-G-EV-N-AGSLERLVSR--SPNLRSLRLNRSVSV-------------DTLAK---------ILL-RTP-NLEDLGTGNLT--DDF--QTESYFKLTSAL---EKCKMLRSLSGFWDA-----SPVCLSFIYPLCAQLTGLNLSYAPTLDASDLTKMISR…
	Zea_mays_GRZM2G137451 ----TYFPGEV----VEHIFSFLPSHSDRNTVSLVCKLWYDVERLSRRGVFVGNCYAVLPERVVLRFPNVKALTVKGK-PHFAD---------FNLVPP--DWGGYAGPWIEATARSCL-SLEELRMKRMVISDENLELLAR-TF--PKFKVLVLISCEGFSTDGLAAIANHCKLLRELDLQENDVE--DRGPRWLS-FPDSCTSLVSLNFACIK-G-EV-N-SGALERLVAK--SPNLRSLRLNRSVSV-------------DTLSK---------ILE-RTP-NLEDLGTGNLT--DEF--QAESFVRLTSAL---EKCKRLRNLSGFWDA-----SPIFVPFIYPLCHQLTGLNLSYTPTLDYSDLTKMISRCV…
	Zea_mays_GRMZM5G848945 ----TYFPEEV----VEHIFSFLPSHSDRNTVSLVCKVWYEVERLSRRAVFVGNCYAVRPERVVLRFPNIKALTVKGK-PHFAD---------FNLVPP--DWGGYAGPWIDAAARSCV-GLEELRMKRMVVFDENLELLAR-SF--LRFKVLVLISCEGFSTDGLAAIASHCKLLRELDLQENDVE--DRGPRWLS-FPDSCTSLVSLNFACIK-G-EV-N-SGALERLVAR--SPNLRSLRLNRSVSV-------------DTLSK---------ILL-RAP-NLEDLGTGNLT--DEF--QAESYSRLTSAL---EKCKKLRSLSGFWDA-----SPICVPYIYPLCHQLTGLNLSYTPTLDYSDLAKMVSRC…
	Oryza_sativa_Os11g31620 ----VFFPEEV----VEHILGFLASHRDRNAVSLVCREWYRVERLSRRSVLVRNCYAARPERVHARFPGLRSLSVKGR-PRF??---------???VPA--GWGAAARPWVAACVAACP-GLEELRLKRMVVTDGCLKLLAC-SF--PNLKSLVLVGCQGFSTDGLATVATNCRFMKELDLQESLVE--DRDSRWLGCFPKPSTLLESLNFSCLT-G-EV-N-SPALEILVAR--SPNLRSLRLNRSVPL-------------DVLAR---------ILC-RRP-RLVDLCTGSFV--RGN--IVGAYAGLFNSF---QHCSLLKSLSGFWDA-----TSLFIPVIAPVCKNLTCLNLSSAPMVRSAYLIEFICQ…
	Zea_mays_GRMZM2G155849 ----AYFPDEV----VGYILGYVTSHQDRNAVSLVCRAWYDIERHGRHSVLVRNCYAVCPERVHMRFPNMRALSLKGK-PHFAE---------FNLVPA--GWGATANPWVDACARACP-GLEELRLKFMVVTDECLKLLSL-SF--TNFKSLVLVCCEGFSTTGLANIATNCRFLKELDLQKSCVK--HQDHQWINCFPKSSTSLECLNFSCLT-G-EV-N-AVALEELVAR--SPNLKSLRLNLAVPF-------------DVLSR---------ILS-RTP-KLEDLGTGSFL--QGN--DPAAYASLCRAL---ENCTSLKSISGFWDA-----PGFYVQGILSNCRNLTCLNLSYATLIQSTQLIGIIRHC…
	Phoenix_dactylifera_30s671321g002e ----TYFPEEV----VEHIFDFLESHRHRNTVSTVCKAWYRVERLSRRSVFVGNCYAVRPERVVVRFPGVRSLSVKGK-PHFAD---------FNLVPH--DWGGFALPWIEAFARGCP-GLEELRLKRMVVSDESLELLAR-SF--PNFKVLVLVSCEGFSTDGLAAIATHCRVLRELDLQENEVE--DRGPQWLSCFPDSCTSLVSLNFACLK-G-DV-N-AGALERLVAR--CPNIRTLRLNRAVSV-------------DSLSK---------ILA-RAP-HLVDLGTGSFT--MDH--RAEAYHRLMNNF---TKCKSLKSLSGFWDA-----SPRCLPAVYPICRNLTGLNLSYAPAI…
	Phoenix_dactylifera_30s803071g001 ----TYFPEEV----VERIFDFLATHRDRNAVSTVCKTWYRVERLSRRSVFVGNCYAVRPERVVARYPRLRSLTVKGK-PHFAD---------FNLVPH--DWGGFALPWIEAAARGCP-GLEELRLKRMIVFDESLELLAR-SF--PNFKVLVLISCEGFSTDGLAAIATYCRVLRELDLQENEME--DRGPQWLSCFPDSCTSLVSLNFACLK-G-EV-N-AVSLERLVAR--CPNLRTLRLNRAVSV-------------DTLSK---------ILA-RAP-HLVDLGTGSFT--IDH--RAEAYHKLINNF---IKCKSLRSLSGFWDA-----TPRCLPAVYPICGNLTGLNLSYAPAIQ…
	Ananas_comosus_003615 ----RYFPEEV----VEHIFGFLTSHRDRNAVSLVCKAWYRVERLSRRSVFVGNCYAVRPERVAARFPRLTSLRVKGK-PHFAD---------FNLVPP--DWGGNAAPWIEEAARSCP-ALLELRLKRMVVTDESLELLAR-SF--PNFQSLVLISCEGFSTNGLAAIATHCRYLRELDLQENEVE--DRGPQWLSCFPDSCTSLISLNFACLK-G-EV-N-PATLERLVAR--CPNLQTIRLNRSVTV-------------ESLAK---------IVE-RAP-QLRDLGTGSFA--VDL--RSEACHKLMNAL---RKCKSIRSLSGFWDA-----RSQCRTVIYPICANLTGLNLSYGPLIQCSELTFLIRHCW…
	Ananas_comosus_017824 ----TYFPEEV----VEHIFGFLTAHCDRNAASLVCRAWYHVERMSRRRVFVGNCYAVRPERVAARFPAVRSLTVKGK-PHFAD---------FNL????????????????????????????????RMVVSDECLETLAR-SF--PNFRALVLISCEGFSTHGLAAVATHCRHLREIDLQENEIE--DRGPQWLSCFPESCTSLVSLNFACLK-G-EI-N-VAALERLVSR--CPNLRSLRLNRAVSV-------------EALSR---------ILM-KAP-QLVDLGTGSFW--VDH--RSEAFHRLISAI---ERCKSLRSLSGFWDA-----SPLCLPAIYPICSNLTGLNLSYAPAIQGSDLIKLIRHCW…
	Ludovia_sp_VVVV2008251 ----TYFPEEV----VEHIFDFLGSHGDRNAVSLVCKAWHRVERLSRRAVFVGNCYAVSPARVAARFPGVRSLTVKGK-PHFAD---------FNLVPY--DWGGFAMPWVEAAARGCH-GLEELRMKRMVVSDECLEMLAR-LF--PGLKSLVLVSCEGFSTDGLAAIATHCRVLRELDLQENDVE--DHGTQWLSCFPDSCTSLLSLNFACLK-G-EV-N-AGVLERLVAR--CPNLRSLRLNSTVSM-------------ETLSK---------VLS-RAP-QLVDLGTGSFS--LGQ--HYEVYHKLLNAV---QKCKSLKSLSGFWDA-----SPLCLPLLYPICPNLTALNLSYSPGIQGAELIKLISQC…
	Ludovia_sp_VVVV2008253 ----TYFPEEV----VEHVFSFLGSHSDHNAVSLVCKDWYRIERLSRHTVFVGNCYAVTPARAAARFPGMKALCVKGK-PHFAD---------FNLLPA--GWGAAAGPWIEAVARGCP-GLEELRLKRMVVSDESLELLAR-SL--PNFQSLVLLSCEGFSTNGLAAIATHCRCLRVLDLKENEIE--DCGPQWLSCFPDSSTSLVTLNFSCLK-G-EV-N-AGALERLVAR--SPNLKCLRLNRTVSI-------------ETLSK---------ILD-KAP-QLVDLGTGSFI--LNP--RSEASHKLLKII---NNCRAISSLSGLWDA-----LPNCLPALYPICANLTGLNLSYAPLIGRYSLIKLIRQS…
	Liriodendron_tulipifera_b3c3369 ----MYFPDEV----LEHIFDFLSSHQDRNSVSLVCKSWFK?ERCSRNRVFIGNCYAIGPKRLIERFPRVRALSLKGK-PHFAD---------FNLVPH--DWGGFVHGWIVAMAKSYP-WLEELRLKRMVVSDDSLELLSR-SF--PNFKALVLVSCDGFTTDGLAAIAANCRVLRELDLQESEVD--DRRGNWLSCFPDSFTSLVSLNFACLK-G-DV-N-FGALERLVAR--CPNLRSLRLNRTVPF-------------EVLCR---------ILV-RAP-QLEDLGTGSFV--HDI--RSQSYHKLANAL---HNCKSVKILSGFWEV-----NPRCLLAVYPICSNLTSLNLSYAPSIQGA…
	Persea_borbonia_WIGA2015023 ----MYFPEEV----LEHVFDFLSSHRDRNAASLVCKSWFKVERWSRHKVFIGNCYAITPERLIKRFPKVRSLSLKGK-PHFAD---------FNLVPH--EWGGFVLPWIEAMAKSYP-GLEELRLKRMVVSDESLELLSR-AF--PNFKVLVLVSCEGFTTDGLAAIAANCRFLRELDLQENDVD--DHRGHWLCRFPDSCTSLVSLNFACLK-G-EV-N-LGALERL???????NLRSLRLNRSVPA-------------EILSK---------ILV-KAP-QLMDLGAGSCI--LVP--RSDSFTKLSSAF---LNCASVKSLSGFWEV-----TPRCLLAVYPICSKLTSLNLSYATAIQGNDLIK…
	Illicium_floridanum_VZCI2004098 ----SYFPDEV----LEHVFDFLTTHKDRNAVSLVCKSWFWVEKCSRPRVFIGNCYAVTPEKLISRFPRVRALSLKGK-PHFAD---------FNLIPE--NWGGNVYPWIEAMSRSYP-FLEELRLKRMVISDEALELLAH-SF--PNFKALILVSCDGFTTDGLAAVAANCRYLSVLDLQENDID--DRRGHWLSCFPDSSTSLVSLNFACLK-G-EV-N-FAALERLVAR--CPNLRSLRLNRTVPL-------------EMLHR---------ILI-RAP-QLVDLGTGSYS--QDS--RSEHYIKLKNAI---LNCKYLQSLSGFWEV-----APFCLPSLYPVCAALTSLNLSYSS-IPAS…
	Illicium_floridanum_VZCI2004099 ----YYFPDEV----LEHIFDFLTTDRDRNSISLVCKSWFRVERCSRQRVFIGNCYAVTPERLISRFPRIKALSLKGK-PHFAD---------FSLVPQ--DWGGIVYPWIEAMARSYP-WLEELRLKRMVVSDEALELLAH-SF--PNFKALILVSCDGFSTDGLAAIASNCRHLRELDLQENEID--DR-GQWLSCFPDSCTSLVSLNFACLK-G-AV-N-SVALERLVAR--CPSLRRLRLNRTVPL-------------GMLQR---------ILV-RAP-QLVDLGTGSYF--QDP--LSENYAELKNLL---KNYKSLRSLSGFWEV-----APSCLPSLYPICADLTSLNLSYSS-IRTS…
	Kadsura_heteroclite_NWMY2006168 ----?????EV----LEHVFDFLTTHQDRNAVSLVCKSWFWVEKWSRQRVFIGNCYAVTPKRLIDRFPRIRVLSLKGK-PHFAD---------FNLIPE--NWGGNVYPWIEAMARSYP-LLEELRLKRMVVSDEALELLAH-SF--PNFKALVLVSCDGFTTDGLAAIAANCRYLNVLDLQENDID--DRRGHWLSCFPDSSTSLVSLNFACLK-G-EV-N-FSALERLVAR--SPNLKSLRLNRTVPL-------------EMLHR---------ILV-RAP-QLVDLGTGSYS--QDS--RSEHYTKLKNAI---LNCKSLRSLSGFWEV-----APFCLPSLYPICDALTSLNLSYSS-IPTS…
	Nymphaea_sp_PZRT2015547 ----???????----???????????????????????????????????????????????LISRFPRIKSLTLKGK-PHFAD---------FNLVPH--DWGGHVYPWIEAMAKSYP-WLEEIRLKRMVVSDESLELLSR-SF--PNFKSLVLISCDGFTTEGIAAIAAHCRDLRELDLQENDIE--DHRGNWLNYFPDTCTSLVRLNFACLE-G-EV-N-AGALERLVGR--CPNLKSLRLNRSVPL-------------EVLYR---------ILL-RAP-QLVDLGTGGNS--QEP--RTVRSANIANAF---LKCKSLRSLSGFWEV-----APSYLHL-VSLCAGLTSLNLSYAT-IPSNDLIKLVRH…
	Nuphar_advena_c5590 ----ASFPDEI----VEHIFDFISSHRDRNSVSLVCKSWFRLERWSRTRVFIGNCYAISPERLIRRFPRIKSLTLKGK-PHFAD---------FNLVPH--DWGGEVYPWIEAMAKSCP-WLEELRLKRMVVSDESLELLSH-SF--PNFKSLVLISCDGFTTDGIAAVAANCRHLRELDLQEDDIE--DHRGHWLSCFPDSCTSLERLNFACLK-G-EV-N-SGALERLVAR--CQNLKSLRLNRSVPL-------------EILYR---------ILL-KAP-QLVDLGTGGYS--QEP--RSEH-FDIASAF---LKCESVRSLSGFWEV-----APMHLQSVYPVCANLTSLNLSYAI-IPSADLIELVRHCPKL…
	Nuphar_advena_c6931 ----ASFPDEI----VEHIFSFISSHRDRNAVSLVCRSWFRLERWSRERVFIGNCYAISPQRLIARFPRIKSLTLKGK-PHFAD---------FNLVPH--DWGGQVDPWIEAMAKSYP-WLEKLRLKRMVVSDESLELLSR-SF--PNFKSLVLISCDGFTTDGIAAVAANCRHLRELDLQENDIE--DHRGHWLSCFPDSCTSLVRLNFACLK-G-EV-N-FGALERLVAR--CPNLKSLRLNRSVPL-------------EVLYR---------ILL-KAH-QLVDLGTGGYA--HEP--RSVRSTNMANAF---LKCKSLRSLSGFWEV-----APSYLQSVYSVCANLTSLNLSYAT-IPSSELIKLVSHCPKL…
	Amborella_trichopoda_16_85 ----TSFPEEV----LEHVFDFISSHKDRNSVSVVCQSWFRVERCSRRNVFIGNCYATNPERVISRFPRVKALSLKGK-PHFAD---------FNLVPH--DWGAHVLPWIEAMARSYQ-WLEELKLKRMLITDDCLDLISH-AF--PNFKALVLISCEGFSTDGLASIAANCRNLRELDLQECEIE--EKNTPWLSCFPETCTSLVSLNFACLK-G-EV-N-PAVLERLVAR--CPNLKSLKMNRSVPL-------------EMLHK---------ILA-RAP-QLVELGTGAFT--QEP--RSEHYIKLFNAF---HNCKNIKSLSGFWEV-----APVYLPSIYSVCANLTSLNLSYAL-IQGPELIKL…
	Pinus_taeda_jcf7180063200655e ---MSSFPDEL----LEHVLAFLSSHRDRNAVSLVCKSWFRIEAGSRQRVFIGNCYAVSPAILIRRFPRIKSVALKGK-PHFAD---------FNMVPP--GWGADIHPWLAAMAEAYP-WLEELRLKRMVITDESLQLLAR-SF--PNFKVLVLTSCDGFSTDGLAAIAAHCRHITELDLQESDID--DRGGNWLSCFPDSCTSLVSLNFACLT-K-EV-N-FEALERLVAR--CTSLRSLKLNRLVPL-------------ELLHR---------LLV-RAP-HLEDLGTGAFL--HEP--RTEQYSKLKVAL---QNCKRLQSLSGFWEV-----APGYLPLVESLCSNLTSLNLSYAT-IQSAEL…
	Podocarpus_rubens_XLGK2059681 TC-WSSLPDEL----LGHMFSFVTEHRDRNSASLVCKSWYKVDKGSRQRVFIGNCYAVSPQILIKRFPNIRSLTLKGK-PHFAD---------YDLVPH--GWGADSYPWMEALAGAYSTTLEELRLKRMVITDTTLELLAH-SF--PNFKVLVLTSCEGFSTDGLATIAAHCRHLTDLDLQENEID--DRGGHWLSCFPESCTSLVSLNFAYLI-S-EV-S-FEALERLVAR--CTNLKSLRLNRLVPL-------------KLLHR---------LLI-RAP-QLVDFGTGAYL--QEQ--RFEEYEKLKHAF---DNCKGLQSLSGFWEV-----APVYLPSVYSVCSNLTSLNLSYAA-IQCAEL…
	Cycas_micholitzii_XZUY2010422 LE-MDYFPEEV----LEQVLEFLTSQKDRNSVSLVCKSWFKVEAWSRKRVFIGNCYALSPQILIRRFPRLKSLTLKGK-PHFAD---------FNLVPP--DWGGDVHPWIVAMAKAYP-WLEELRLKRMVISDESLALMAN-SF--PNFKVLVLISCEGFSTDGLATVAAHCRHLTELDLQENDIE--DRGGHWLSCFPESCTSLVSLNFACLN-S-AV-N-FEALERLVTR--CTSLQSLRLNRSMPL-------------DLLHR---------LLL-RAP-QLVDLGTGAYL--QEP--RAEQYTKLKSTF---DNCKALRSLSGFWEV-----APVYLPSVYSVCLNLTSLNLSYAR-IQSAEL…
	Salvinia_cucullata_v1_1_s0052_g014055 QT-MAKFPEEA----LEHVLTFVTSHKDRNSVSLVCKAWYRVEALTRQRVFVGNCYSVSPEFLVRRFKNLKSLTMKGK-PRFSD---------FGLVPP--FWGGYAAPWISALVGAYP-WFEELRLKRMTVSDDSLLLLAK-SL--PNFRALVLTTCDGFTTAGLAHIAAYCRNLQVLELQECEVV--DE-GDWLSCFPESSTSLVSLNFVSCT-S-EA-N-FDALERLVVR--CTSLQSLKLNDSVSL-------------QQLER---------LIS-KAP-QLTDLGTGSFS--AAD--D-TCVRSFERVI---SRCTQLRSLSGFWLV-----SSRCMPSLYSVCCNLTFLNLSYA…
	Woodsia_scopulina_YJJY2016589 ---VACFPEEV----LEHVLTFVTSHKDRNAVSLVCKAWYRVEALTRQCVFIGNCYAVSPDAVTHRFKNLKSLTLKGK-PRFSD---------FGLVPP--GWGAFADLWISALAHAYP-WFEELRLKRMVISDSCLALLAR-AF--PNFRTLALTNCEGFTTGGLAPVAANCRYLQVLELQECEVD--ETGGHWLSSFPDSFTSLVSLNFACT?AS-EV-D-FEALEKLIAR--CSSLKILKLNNAVSF-------------EQVVR---------LLC-KAP-QLTDFGTGSFF--ARE--P-FCIRKFETAL---SHCKGLQSLSGFWDV-----ASICLPSLYATCKNLTSLNLSYASSIRSNEM…
	Polypodium_glycyrrhiza_CJNT2081193 ---VACFPEEV----LDHVLTFVTSHKDRNAVSLVCKAWHRVEALTRQCIFIGNCYAVSPDAVTRRFKNLKSLTLKGK-PRFSD---------FGLVPP--GWGAFADPWISALAHAYP-WFEELRLKRMVISDSCLALLAR-SF--PNFRTLVLSSCEGFSTDGLAPVAANCRCLQVLELQECELD--ETGGDWLSSFPDSFTSLVSLNFACTC-S-EV-D-FEALEKLIAR--CSSLKSLKLNNAVSF-------------EQGVR---------LLS-KAP-QLTDFGTGSFF--ARE--A-FCIRRFETAL---AICKGLKSLSGFWEV-----ASICLPSLYATCKNLTSLNLSYASSI…
	Adiantum_tenerum_BMJR2063861 ---VVFFPEEV----LEHVLTFVTFHKDRNAVSLVCKEWYRAEALTRQSVFIGNCYAIRPDAVTHRFKNLKSLTLKGK-PRFSD---------FGLVPP--KWGGFAYPWISALALAYP-WFEELKFKRMVISDSCLAMLAH-SF--PNFKALVLTSCEGFTTGGLTPIAANCRYLQVLELQECEVD--DTGGHWLNSFPDSFTSLVSLNFACMT-S-EV-N-FESLERLIGR--CTSLRSLKLNDAVSF-------------KQVVR---------LLC-KAP-QLLDLGTGSFF--ARE--A-FCFRKFEKAL---SYCKGLRSLSGFWGM-----ASVCLPSLYSVCKNLTSLNLSYANSLQSDEMI…
	Adiantum_tenerum_BMJR2063507 QR-KACFPEEV----LEHVLTFITSHKDRNAVSLVCKSWYHVEALTRQRVFIGNCYSVSPVSLTQRFKNLKSLTVKGK-PRFAD---------FGLVPA--YWGAYADPWVSALVDAYP-WFEELRLKRMTVSDECLSKLAR-SF--PNFRALVLTTCDGFTTSGLAHVAANCRHLQVLEMQECEVG---YGGEWLSCFPDSFTSLVSLNFTSCA-D-EV-D-FNALERLVSR--CTSLKILKLNNAVTF-------------EQLER---------LVA-KAP-QIMDLGTGSFA--APE--G-PLVNRFERAI---AKCTELQCLSGFWLV-----SSRCVPSLYPICSKLTFLNLSYASSMRSTEMI…
	Polypodium_hesperium_ZRAV2024579 HR-HACFPEEV----LEHVLTFISSHKDRNAISLVCKAWYHVEALTRQHVFIGNCYSVSPVSLTQRFKNLKSLTVKGK-PRFAD---------FGLVPQ--YWGAYADPWVSALADAYP-WFEELRLKRMTVTDDCLAKLAH-SF--PNFRSLVLTTCDGFSTDGLAHIAANCRNLQVLELQECDIE--DEGGEWLSCFPESFTSLVSFNFTSCT-N-EV-D-FDALERLVSR--CTSLKSLKLNNAVTF-------------EQLVR---------LVA-KAP-QVTDLGTGSFS--APE--G-LSVKSFEKAI---SECTELRCLSGFWLV-----SSRCVPSLYPVCGNLTFLNLSYASTIRS…
	Lygodium_japonicum_PBUU2078971 QK-EVYFPEEV----LEHVLTFITSHRDRNAVSLVCKAWYHLEALTRQRVFIGNCYSVSPCFLTNRFKNLKSLSIKGK-PRFSD---------FGYVPQ--YWGAYAETWVIALADAYP-WFEELRLKRMMITDDCLGLISR-KF--PHFRSLVLTTCDGFTTSGLAPIAANCRHLQVLELQECVVG--EAGGHWLSCFPESFTSLVSLNFSCTE-S-PV-N-AEALERLVAR--CTSLTSLRVNSAVSF-------------EQLQR---------LLA-KAP-QLTDLGTGSLF--APE--G-VPIRNFERVI---SQCKSLQSLSGFWEV-----ASFCLPVLLPICRNLTSLNLSYASSIQSND…
	Lygodium_japonicum_PBUU2014103 ???????????----?????????????????????????????????????????????????????????????????????---------??LVPP--DWGAYAEPWITALAEAYP-WFEELRLKRMVVTDNCLSLVAH-CF--PNFRALVLTSCNGFSTGGLVPIARSCRHLQFLELQECEID--EVGGHWLSFFPESFTSLISLNLSCTK-S-EV-E-FESLERLVAR--CTSLRSLKLNLPVSF-------------DQLKR---------LLL-KAP-QLVDLGTGSFL--ATE--A-LQVRVLEETI---LNCKNLQSLSGFCEV-----APMCLPALYPICSNLISLNLSYALDIQAPD…
	Equisetum_hymale_JVSZ2013698 AS-LAVFPEEV----LEHVLVALTEAKDRNAASLVCKAWNRAEALTRRSLFVGNCYAVLPSTVTHRFRNLRSLSLKGK-PRFSD---------FGMVPP--NWGANVYPWVVALAEAYP-CFESLRLKRMVVSDDTLALLAH-SF--PNFKSLVLTTCDGFSTRGLIPIASHCRHLRELELQECEVV--EAGGEWLSSFPESFTSLVRLNFACTA-S-QV-D-GEALVRLAGR--CRSLQSLRVNVAVSL-------------DHLAR---------ALL-NAP-LLTDLGTGSFA--CDR--QRAPVARFEAAL---RKCKGLESLSGFWDA-----TPACLPSIYIACPNLTSLNLSYVTTLQSDDLV…
	Equisetum_hymale_JVSZ2128307e ------FPEEM----LEHVLLAITAPKDRNAVSLVCKSWNRVEQSTRRGLFIGNCYAVSPCFVTRRFPNLKSLSLKGK-PRFSD---------FGLVPA--DWGAHALPWITALASAYP-WFEEIRLKRMVITDPGLECIAD-EF--PNFKSLVLTSCVGFSTSGLIPIASRCRHLAELELQECVME--ETGGKWLSCFPDSLTSLIRLNFACMQ-S-AV-N-VEALENLVLR--CRSLQSLKVNMSVSL-------------SQLER---------ILR-RAP-QLTDLGTGSFT--LDF--QKMPISSFEAAI---QNCKSLQSLSGFCEA-----MPACLPSIYGVCANLTSLNLSYASFLRSDDI…
	Angiopteris_evecta_NHCM2014367 -----CFPEEV----LEHVLAFLTSHKDRNAVSLVCKSWYRVEALSRQRVFIGNCYAVSPVFLTHRFKNLKALTLKGK-PRFAD---------FGFLPR--HWGGHVHSWIVALAKAYP-WFEELRLKRMVVSDESLAILAR-SF--PNFRVLVLSTCEGFSTDGLASVASNCRHLAELELQECEIE--NNGGHWLSCFPDSCTSLVSLNFAGTS-N-EV-N-FEALERLVTR--CTSLRSLKVNSAVSL-------------EQLRR---------LLL-RAP-QLTDLGTGSFS--LEP----SLISRFENAL---VSCKGLQSLSGFWEV-----APVCLPSLYPICSNLLSLNLSYASSVRSND…
	Angiopteris_evecta_NHCM2009296 -----SFPEEV----LEHVLGFLTSHKDRNAVSLVCKAWYRVEALSRQRVFIGNCYAVSPIFLIHRFKNLKALTLKGK-PRFSD---------FGLVPP--HWGAHVQPWII???????-???ELRLKRMVVSDESLAILAR-SF--PNFRVLVLSNCDGFSTDGLARIAANCRHLAELELQECEIE--DFGGHWLSCFPDSCTSLVSLNFACTR-G-EV-N-FEALERLVAR--CTSLKSLKVNIAVSM-------------EQLQR---------LLL-KAP-QLTDLGTGSFS--LEP--GRVSISRFESAL---VGCKGLRSLSGFWEV-----ASVCLPTLYPICGNLTSLNLSYASSIRSNE…
	Sceptridium_dissectum_EEAQ2001179 -----SFPEEV----LEHVFAFLTSHKDRNAVSLVCKAWYRVEALSRQRVFIGNCYAVSPIFLTHRFKNLKSLTLKGK-PRFSD---------FGFVPR--GWGAHVHPWIIALANSYP-WFEELRLKRMVVSDESLAVLAR-SF--PNFRVLVLTSCDGFTTDGLVPVAANCRHLTELELQECEII--DTGGHWLSCFPESHTSLVSLNFACTS-S-EV-N-FAALEKLVAR--CTSLKSLKVNSAVSL-------------KQLER---------LLL-KAP-QLIDLGTGSFS--LEP--DTAAISRFESAI---ISCKGLRSLSGFWEV-----SSLCLPSLYAICGNLTALNFSYASTIQ…
	Carica_papaya_27_130 TR-SLPFPDEV----LERVLSLLKTSKDRSSVSLVCKDWYNAERWSRCHVFIGNCYSVSPEIVTRRFPNIRSVTLKGK-PRFSD---------FNLVPD--NWGADIQAWLVVFAAKYP-FLEELRLKRMTVTDESLEFLAL-SF--PNFKALSLFSCDGFSTSGLAAIATHCKNLTELDIQENGID--DRNGSWLSCFPENFTSLEVLNFANLT-S-DV-N-FDALERLVSR--CKSMKVLKVNKSICL-------------EQLQR---------LLV-FAP-HLVELGTGSFS--QEL--TIHQYADLESAF---SNFKNMHTLSGLWEA-----TAIYLPVLYPACANLTFLNLSYAA-LQSDELANLLSHCPY…
	Moringa_oleifera_CZPV2013286 TR-ASPFPDEV----LERVL???NSNKDRSSVSLVCKEWYNAERWSRSHVFIGNCYSVSPEIVVRRFPKIRSVTLKGK-PRFSD---------FNLVPD--NWGADIHAWLVIFAAKYP-FLEELRLKRMTVTDESLEFLAL-SF--PNFKALSLLSCDGFSTSGLAAIATHCRNLTELDIQENGID--DRNGSWLSCFPENFTSLEVLNFANLT-S-DV-N-FDALERLVSR--CRSMKVLKVNKSISL-------------EQLQR---------LLA-CAP-QLMELGTGSFS--QEL--TTHQYAELESAF---NNCRNMHTLSGLWEA-----TAVYLPVLYPACSNLSFLNLSYAA-LQSGDLG…
	Tropaeolum_peregrinum_MYZV2059535 TP-NSSFPDEV----LEPVLSLLRSPKDRSSVSLVCKDWYNAERWSRSHVFIGNCYSVSPEIVARRFPNIRSVTIKGK-PRFSD---------FNLVPE--NWGADIHPWLVVFAAKYP-LLEELRLKRMTVTDESLEFLAQ-SF--PNFQALSVLSCDGFSTSGLATIATHCKNLIELDIQENGID--DRNGSWLSCFPESFTSLEILNFANLT-T-DV-N-FDALERLVSR--CKSMKVLKVNKNISL-------------EQLTK---------LLV-CAP-QLKEVGTGSFS--QDL--TTHQYDELETAF---SNCKNIISLSGLSEA-----IPLYLPALYLACTNLTFLNLSYTA-LH…
	Populus_trichocarpa_004G033900 TR-SSPFPDEV----LERVLSLLKSHKDRSAVSLVCKDWYNAESWSRTHVFIGNCYSVSPEIVARRFPIIKSVTLKGK-PRFSD---------FNLVPE--NWGADVHPWLVVFATKYP-FLEELRLKRMAVSDESLEFLAV-NF--PNFKVLSLLSCDGFSTDGLAAIATHCKSLTQLDIQENGID--DKSGGWLSCFPENFTSLEVLNFANLN-T-DV-N-FDALERLVSR--CKSLKVLKVNKSISL-------------EHLQR---------LLV-CAP-QLTELGTGSFT--PEL--TTRQYAELESAF---NQCKNLHTLSGLWEA-----TALYLPVLYPVCSNLTFLNLSYTF-LQSLE…
	Populus_trichocarpa_011G042400 TR-SSLFPDEV----LERVLSLLKSHKDRSAVSLVCKDWYNAESWSRTHVFIGNCYSVSPEIVARRFPRIKSVTLKGK-PRFSD---------FNLVPE--NWGADVHPWFVVFAAKYP-FLEELRLKRMAVSDESLEFLAL-NF--PNFKVLSLLSCDGFSTDGLAAIATHCKNLTQLDVQENGID--DKSGNWLSCFPENFTSLEVLNFANLN-T-DV-N-FDALERLVSR--CKSLKVLKANKSISL-------------EHLQR---------LLV-CAP-QLTELGTGSFM--PEL--TARQYAELGSSF---NQLKNLNTLSGLWEA-----TAPYLPVLYPACTNLTFLNLSYAF-LQSIE…
	Ricinus_communis_29933_m001427 TR-TSQFPDEV----LERVLGLLKSNKDRSSVSLVCKDWYNAERWSRTHVFIGNCYSVSPEIVARRFPKIRSVTLKGK-PRFSD---------FNLVPR--NWGADIQSWLVVFASKYP-FLEELRLKRMTVNDESLEFLSL-NF--PNFKALSLLSCDGFSTDGLAAIATHCKNLTELDIQENGID--DKSGSWLNCFPGNFTSLEVLNFANLN-S-EV-N-FDALERLVSR--SKSLKVLKVNKNISL-------------EQLQR---------LLA-CTP-QLTELGTGSFS--QEL--TARQFTEVENTF---SHCKNLDTLSGLWEA-----MAPYLPVLYPACTNLTFLNLSYAA-LQSLE…
	Theobroma_cacao_1EG029995t1 AR-GSSSPDVA----LERVLSLLKSHRDRSSVSLVCKDWYNAERWSRTHVFIGNCYSVSPEIVARRFPKIRSVTLKGK-PRFSD---------FNLVPQ--NWGADIHPWLVVFAAKYP-FLEELRLKRMTISDESLEFLAV-SF--PNFKALSLLSCDGFSTDGLAIIATHCKNLTELDIQENGID--DKGGSWLSCFPESFTSLEALNFANLT-S-DI-N-FDALERLVGR--CKSMRVLKVNRSISL-------------EQLQR---------LLV-NAL-QLAELGTGSFS--QEL--TFRQYEELESTL---SSSKNIHTLSGLWEA-----KGLHLPALYPVCTHLTFLNLSYAP-LQSGELAE…
	Theobroma_cacao_1EG029996t1 AR-RSSFPDEV----LERVLSLLKSHRDRSSVSLVCKDWYNAERWSRAHVFIGNCYSVSPEIVARRFPKIRSVTLKGK-PRFSD---------FNLVPQ--NWGADIHAWLVVFAAKYP-FLEELRLKRMTISDESLEFLAV-SF--PNFKALSLLSCDGFSTNGLAAIATHCKNLTELDIQENGID--DKGGSWLSCFPESFTSLEALNFANLT-S-DI-N-FDALERLVGR--CKSMRVLKVNRSISL-------------EQLQR---------LLV-NAS-QLAELGTGSFS--QEL--TFRQYEELESTL---GSCKNIHTLSGLWEA-----KGLYLPALYSLCTHLTFLNLSYAP-LQSGELAK…
	Gossypium_raimondii_011G023100 TR-RSSFPDEV----LERVLSLLKSHRDRSSVSLVCKDWYNAERWSRTHVFIGNCYSVSPEIVARRFPKIRSVTLKGK-PRFSD---------FNLVPE--NWGADIHAWLVVFAAKYP-FLEELRLKRMAISDESLEFLAV-SF--PNFKALSLLSCDGFSTNGLAAIATHCKNLTELDIQENGID--DKGGSWLSCFPESFTSLEVLNFANLS-S-DI-N-FDALERLVGR--CKSMRVLKLNRSVSL-------------EQLQR---------LLV-NAP-QLAELGTGSFS--EEL--TFRQYVELESAL---SNCKNMHTLSGLWDA-----KGIYLPALYPVCTHLTFLNLSYAA-LRSDE…
	Citrus_sinensis_1g007916me AV-TASFPDEV----LEIVLSLLTSHRDRSSVSLVCKDWYRAERWSRTQVFIGNCYSVSPEILTRRFPNIRSVTLKGK-PRFSD---------FNLVPP--NWGADIHAWLVAFAAKYP-FLEELRLKRMAVSDESLEFLAS-NF--PNFKLLSLLSCDGFSTDGLAAIATHCKNLTELDIQENGIE--DSSGSWLSCFPESFTSLEVLNFANLT-S-EV-N-TDALERLVSR--CKSLKVLKVNKSISL-------------EQLQR---------LLV-RAP-QLEELGTGSFL--QDL--TARPYADLESAF---NNCKNIHTLSGLWEA-----VPLYLPALYNSCANLTFLNLSYTA-LQSGEFAKL…
	Citrus_sinensis_1g008051m TS-EVDSVKQA----ITKVLALLTSHKDHNSASLVCKDWYEAEQLSRTHVFIGNCYAVSPEILTRRFPNILSVTLKGK-PRFSD---------FNLVPQ--DWGADIHPWLVAFADRYP-SLEELRLKRMSVSDESLEFLAV-SF--PNFKVLSLSSCDGFSTDGLAAIATNCKNLTELDIQENGIE--DISGSWLSCFPESFTSLEVLNFANVN-S-EV-D-FDALEKLVSR--CKSLKDLKVNKSISL-------------EQLQK---------LLV-LAP-QLVDLGTGSFS--QEL--TDDQRAELESAF---NKCKNIHKLSGLWQA-----TALYFPALSPVCANLTFLNLSYAT-LGSSELVKLL…
	Eucalyptus_grandis_D00718 TR-VIQFPNDV----LERILSLIDSHRDRNAVSLVSKAWYNAERWTRRHVFIGNCYAVSPQIVARRFPNIRSVMLKGK-PRFSD---------FNLVPP--NWGADVHGWLAVFADQYP-QLEELRLKRMTVTDESLKFLAR-KF--HNFRVLSLLSCDGFSTDGLEAIATDCRHLTELDIQENGID--DISGNWLSCFPENFTSMEVLNFASLS-S-DV-N-FDALERLVSQ--CKSLKILKVNKSITL-------------EQLQR---------LLV-RAP-QLTELGTGSFL--QEL--TAHQNEELERAF---IGCKYLHALSGLWEA-----TTLYLPVLYPACTNLTFLNLSYAA-LQSEELAKLV…
	Eucalyptus_grandis_D00716 AA-AAEFPDEV----LERVLALLASHKDRSAASLVSKAWYHAERWSRTRVFIGNCYSVTPEIVAGRFPKIRSVTLKGK-PRFSD---------FNLVPQ--NWGADIRSWLTVFAERYP-FLEELRLKRMTVTDESLKFLAL-KF--PNFRALSLMSCDGFSTDGLAAIATRCRNLTELDIQENGID--DISGDWLSCFPENFTSLEVLNFASLN-S-DV-D-FDALERLVSR--CNSLKVLKVNRTISL-------------DQLQR---------LLV-RAP-RLTELGTGSFL--QEL--NAHQYSELERAF---GGCKTLHTLSGLYEA-----MAPYLPVLYPACANLTFLNLNDAA-LQNEELAKLV…
	Medicago_truncatula_4g091290 DS-NSDFPDEV----LERVLGMMKSRKDRSSVSLVCKEWYNAERWSRRNVFIGNCYAVSPEILTRRFPNIRSVTMKGK-PRFSD---------FNLVPA--NWGADIHSWLVVFADKYP-FLEELRLKRMAVSDESLEFLAF-SF--PNFKALSLLSCDGFSTDGLAAVATNCKNLTELDIQENGVD--DKSGNWLSCFPESFTSLEILNFANLS-N-DV-N-FDALEKLVAR--CNSLKTLKVNKSVTL-------------EQLQR---------LLV-RAP-QLCELGTGSFS--QEL--TGQQYSELERAF---NNCRSLHTLSGLWVA-----SAQYHQVLYPVCTNLTFLNFSYAP-LDSEGLS…
	Medicago_truncatula_8g098695 -----REKDEV----LKQVLGTVKSRKDRNSASLVCKQWYNAERLSRRNVFIGNCYSVTPEILTRRFPNIRSITLKGK-PRFSD---------FNLVPE--NWGADIHSWLVVFAEKYP-FLEELRLKRMVVTDESLEFLAF-SF--HNFKALSLLSCEGFSTDGLAAVAANCKNLTELDIQENDID--DKSGDWLSCFPESFTSLEVLNFANLN-N-DV-N-IDALEKLVGR--CKSLKTLKVNKSVTL-------------EQFQR---------LLV-LAP-QLCELGSGSFS--QDL--TCQQYLELESAF---KNCKSLHTLSGLWVA-----SAQYLQVLYSACTNLTFLNFSYAL-VDSEDLT…
	Prunus_persica_ppa003317m RV-GSDFPDEV----LEQVLGMVKSRKDRSSVSLVCKDWYDAERWSRRQVFIGNCYSASPEIVTRRFRSIRSVTLKGK-PRFSD---------FNLVPP--NWGSDVQPWLEVFASEYP-LLEELRLKRMTVTDESLEFLAV-SF--PGFKALSLLSCDGFSTDGLAAIATHCKNLTELDIQENAID--DKSGGWLSCFPETFTSLEILNFASLN-S-DV-N-FDALEKLVRR--CKSFKVLKVNKNVTL-------------EQLQR---------LLT-HAP-QLLELGTGSFM--QEL--TACQNSQLERAF---SNCNNLHTLSGLWEA-----TALYLPALYPACTNLTFLNLSYSA-LQSWELAKLL…
	Prunus_persica_ppa003070m RL-SSVFMDKV----LEQLLGLVNFRKDRSSVSLVCKDWYEAERLSRRHVFIGNCYSVSPEIVTRRFPNIRSVTLKGR-PRFSD---------FNLVPP--NWGGDVQPWLEVFASECP-LLEELRLKRMTVTDESLEFLAV-SF--PDFKALSLLSCDGFSTDGLEAIATHCKNLIELDIQENDID--DKSGDWLSCFPETFTSLEILNFASLN-S-KV-D-FDALERLVSR--CKSFKVLKVNKSVTL-------------EQLQS---------LLI-QAP-QLLELGTGSFW--QEL--TASQHSQLERAF---SNCKNLHTLSGLWEA-----TALYLPVLYPACTNLTFLNLSYAT-LQSWDLAKLV…
	Cucumis_sativus_045860 RA-GSIFPDEV----LERVLSLVKSHRDRSSVSLVCKDWFNAERWSRTHVFIGNCYSVSPEIVIRRFPNIRSVTLKGK-PRFSD---------FNLVPS--DWGADIHSWLVAFASKYP-ILEELRLKRMTVMDESLEFLSR-SF--PNFKALSMMSCDGFSTDGLAAIATNCKNLTELDILENDIN--DKSGNWLSCFPDTLKSLEVLNFASLN-S-DV-S-FEALEKLVRR--SKSLKVLKVNRNINL-------------EQLQR---------LLV-HTP-QLTELGTGSFS--QEI--TLRQYCDLEEAF---KSCKNLHTLSGLLES-----TVLYLQVLFPACANITFLNLSYAI-LHGGELAGLLSHC…
	Vitis_vinifera_GSVIVT01003183e TR-SSPFPDEV----LERVLGLVKSHKDRSSVSLVCKDWYNAERWSRTHVFIGNCYSVSPEIVARRFPNIRSVTLKGK-PRFSD---------FNLVPL--NWGADIHAWLVVFASKYP-LLEELRLKRMTVTDESLEFLAT-TF--TNFKALSLLSCDGFSTDGLAAIATHCKNMTELDIQENGID--DLGGGWLSCFPENFTSLEVLNFANLS-S-DV-S-FDALEKLVSR--CRSLKFLKVNKNITL-------------EQLQR---------LLE-CAP-QLTELGTGSFH--QEL--TTRQYAELESAF---NNCKNLNTLSGLWEA-----TPLYLPVLYPACMNLTFLNLSDAA-LQSGE…
	Tetrastigma_voinierianum_SZPD2065581e TR-TSPFPDEA----LDRVLGLVKSHKDRSSVSLVCKDWYNAERWSRTHVFIGNCYSVSPEIVARRFPNIRSVTLKGK-PRFSD---------FNLVP?--????????????FASKYP-FLEELRLKRMTISDESLEFLAT-TF--TNFKALSLLSCDGFSTDGLAAIATHCKNLTELDIQENGID--DLGGGWLSCFPENFTSLEVLNFANLN-S-DV-S-FDALERLVNR--CRSLKVLKVNKSITL-------------ENLQR---------LLE-RGP-QLIELCTGSFN--QDL--TPRQYAELENAF---NNCKNLNILAGLWEA-----TSLYLPVLYPACTNLTFLNLSYA…
	Mimulus_guttatus_H01518 CS-HLKFPDEA----LEKVLSFIDSHKDRNTVSLVCKEWYNAERWTRSNLFIGNCYSVSPEIVSRRFPRIKSVRIKGK-PRFSD---------FNMLPR--DWGANVHAWLVMFAEVYP-FLEELRLKRMTVNDESLELLAK-SF--TGFKALSLLSCDGFTDDGLKFVATHCRNLTELDIQDSVAV--DVGGDWLTCFPENFSSLEILNFASLN-S-EV-N-FESLEKLVNR--CKNLRVLKVNESITL-------------DQLQR---------LLV-HAP-NLVELGTGSFM--QEL--TPRQYEDVGSAF---SNCGKLRVLSGLWDA-----TDLHFSVLYGACARLTFLNFSEAV-LQSGELAKLLAH…
	Mimulus_guttatus_M01216 HP-QLPFPDEV----LEKVLSFVNSHKDRSSVSLVRKDWYNAERWTRSKLFIGNCYSVSPEIVARRFPRIKSVTLKGK-PRFSD---------FNMLPR--DWGANVHPWLVMFAKVYP-FLEELRLKRMTVTDESLELLAK-SF--SGFKALSLSSCDGFTENGLKALASHCRNLTELDIQDSISE--DVGGGWLSSFPENFSSLEVLNFASLN-S-DI-S-FDDLERLVSR--CKSLRVLKVNETISL-------------DQLQR---------LLV-HAP-LLTELGTGSFM--QEL--TPRQYEEVETAF---SNCKNLEALSGLWDA-----NSLYLPLLYGACAGLTFLNLSDAP-LQSGDFANLLVH…
	Solanum_lycopersicum_02g079190 LS-QSAFPDEV----LEKVLSLVQSHKDRNSASLVCKDWYNAERWTRTKLFIGNCYSVTPEIVARRFPKIKSVTLKGK-PRFSD---------FNLVPE--NWGADIQAWLDVFAKVYP-FLEELRLKRMAVTDESLEFLAK-SF--LGFKALSLLSCDGFSTDGIGSIAAHCKNLTELDIQENGMD--DISGSWLSCFPDDFTSLEVLNFASMN-T-EI-S-KDALERLVGR--CKSLRVLKVNKNVTL-------------PQLQR---------LLV-RAP-QLMELGTGCFL--PDL--TSRQYEELESAF---SNCKHLHSLSGFWEA-----NRRYLPSLYAACASLTFLNLSYET-IRSGE…
	Daucus_carota_004140e AH-LAPFPDEV----LEKVLSLVKSHKDRSSVSLVCKDWYNADRWSRSKIFIGNCYSVSPEIVARRFPNIRSVTLKGK-PRFSD---------FNLVPQ--NWGADIHSWLVVFAQVYP-FLEELRLKRMVVSDESLEFLAN-SF--PGFKVLSLLSCDGFSTDGLKAIATHCKNLTELDIQENGID--DLGGGWLSCFPETFVSLEVLNFASLN-S-DV-T-FDALERLVSR--CKALRVLKVNKHISL-------------EQIQK---------LLL-RAP-QLMEVGTGSFQ--QEL--VPRQFAELETAF---GSCKNLHTLSGLWEA-----SSVYLPVIYPACANLTYLNLSYAT-LQSDELSKLLPNCS…
	Daucus_carota_008072e NQ-TAPFPDEV----LEPVLTFVTSRKDRSSVSLVCKVWYNAERWSRRKVFIGNCYSVSPEILVRRFPNMRSVTLKGK-PRFSD---------FNLVPQ--NWGADIHSWLVVFAEFYP-FLEELRLKRMVVRDESLEFIAK-SF--LGFKALSLLSCDGFSTDGLKAIATHCKNLTELDIQENGID--DFGGGWLSCFPETFVSLEVLNFACLN-S-DV-T-FDALERLVDR--CKALRVLKVNKNISL-------------EQLQK---------LLL-KAP-QLVELGTGSFQ--QQL--VPRQFAELETIF---SRCKNLQTLSGLREV-----SSVYLPALYLVCVNLRFLNLSCAT-LQSDELAELLSKCS…
	Daucus_carota_028134e ST-KLTKEIEV----LKQVLPLITSHKDRNSVSQVCKDFYHVERCSRTKVFIGNCYAVSPEMVARRFPNIRSVTLKGK-PRFAD---------FNLVPE--NWGADVHSWLVVFAEFYP-FLEELRLKRMTVSDASLEFLAT-SF--TEFRALSLSSCDGFSTDGLEAIATHCKALTELDIQENDID--DVSGDWLSCFPEDFASLEVLNFSSLN-T-DV-S-FDVLEDLVCR--CKSLRVLKVNKNISL-------------EQLQR---------LLV-WTP-QLIELGTGSFN--QEL--VPRQFQMLESAF---DNCKNLSTISGLWEA-----TSQNLAALYPVSARLSFLNLSYAN-LQSSALAELLAHCS…
	Aquilegia_coerulea_045_00035 ---------KA----LEHVFVTLKSHKDRSSVSLVCKDWYEAERKSRTHVFIGNCYSVSPEIVIKRFPNIKSVTLKGK-PRFSD---------FNLVPP--NWGADIHLWLVAFASAYP-FLEELRLKRMVVTDESLELLVQ-SF--PNFKALSLVSCEGFSTDGLELLATHCKNLTELDIQENSFE--DLEGSWLSYFPESFTSLEVLNFANTQ-S-EV-S-FAALEQLVAR--CKSLKVLKVNKCVTL-------------EQLQS---------LLV-QAP-QLTELGTGLFS--GDL--TAQQHTELTDAF---DNCRNLQALSGLWDA-----ASIYLPLLYPACANLSFLNLTDAA-LQSEDLA…
	Aquilegia_coerulea_038_00173 RL-ISCFPDEV----LERILYYLKSNKDRSNVSLVCKDWFNAERWSRRNVFIANCYSISPEIVIKRFPNIKSVTLKGK-PRFSD---------FNLVPP--NWGADIHPWLLIFASAYP-FLEELRLKRMVISDESLEFLAQ-CF--TNFKALSLVSCEGFSTNGLAVITTHCKNLTELDIQENGFD--DLAGSWLGCFPESFTSLEVLNFANMQ-S-EV-S-FDALERLVAR--CKSLKVLKVNKSVTL-------------EQLKS---------LLL-QAP-QLTELGTGMFS--QDL--TVRQHTELANAF---NSCKKLHTLSGLWDA-----TSIYLPLLYSSCTNLTFMNLSDAA-LRSADLA…
	Phoenix_dactylifera_30s723411g001 NR-ILSFPDEV----LERVLIFVKCHKDRSAVSLVCRDWYNAERWSRTHVFIGNCYSVSPEMVARRFPNIRSVTLKGK-PRFYD---------FNLVPP--NWGADLHPWLVVFASAYP-FLEEFRLKRMTVTDESLDFLAR-SF--PEFKALSLVSCDGFSTDGLASIATYCRNLTELDIQESGID--DLGGSWLSCFPDSFTSLEALNFANLH-S-EV-N-FDALERLVAR--CKSLKVLKVNKHVTL-------------EQIRR---------LLV-RSP-QLTELGTGSFS--QDQ--KLRSDADLESAF---SNCKNFNTLSGLWEV-----SSVYLPALYPVCANLTFLNLSYTA-LQ…
	Phoenix_dactylifera_30s708451g004e NC-NLSFPDEV----LRRVLIFVESHKDRSAVSLVSKEWYDADQWSRTHVFIGNCYSVSPEMEARRFPNIRSVTLKGK-PRFYA---------FNLV------GADIHSWLVVFASAYP-FLEELRLKRMTVTDESLDFLAR-SF--PGFKAFSLVSCDGFSTDGLASIAAYCRNLTELDIQESGIE--DLGGSWLSCFPESFTSLEALNFANLH-S-EV-N-FDALERLVAR--CKSLKVLKVNKHVTL-------------EQLRR---------LLM-RAP-QLTELGTGSFS--QDH--KLRSDAELESAL---CRCKNLNTLSGLWVV-----SSMYLPALYPACTSLTFLNLSYAA-L…
	Ananas_comosus_014412 NR-ISSLPDEV----LECVLIFLKSHKDRNAVSLVCKDWYHAERWSRTHVFIGNCYSISPEMVVRRFPNIRSLTLKGK-PRFYD---------FNLVPP--NWGADIHSWLVVFASAYP-SLEELRLKRMTVTDDSLEFLAR-AF--HGFKSLSLVSCDGFSTNGLASIAAYCRNLTELDIQESGVD--DLGGSWLSCFPDSFTSLESLNFANLH-S-EV-N-FDALERLVAR--CKSLEVLKVNKHVTL-------------EQLRR---------LLI-KAP-QLTELGTGSFS--QDL--KLRSYTELESAF---SNCKDLHTVSGLWVV-----SSMYLPAIYPACSNLTFLNLSYVA-LLSTDLAKLLLNCP…
	Ludovia_sp_VVVV2007298 SR-FSLFPDEV----LERILGFVKSHRDRSSVSLVCKDWYSAERWSRTRVFIGNCYSVSPEIVARRFPNIRSITLKGK-PRFSD---------FNLVPP--DWGADIHAWLVVFASAHP-FLEELRLKRMTVTDESLEFLGR-SF--PGFKAL??????????????????????????????????--?????WLSCFPESFTSLEALNFANLN-S-EV-N-FDALERLVSR--CKSLKVLKVNKNVTL-------------EQLCR---------LLL-RAP-QLVELGTGSFF--QDH--MLRADSDLVNAF---NNCKNLHTLSGLWEV-----SSLYLPALYPACSNLTFLNLSYAA-LESTELAKLLPNC…
	Persea_borbonia_WIGA2017271 TR-LSTFPHEV----LERILGFVKSHKDRSSVSLVCKDWYSAERWSRTHVFIGNCYSVSPEILIRRFPKIRSVTMKGK-PRFSD---------FNLVPE--NWGADIHYWLLYFASAYP-FLEELRLKRMTVTDESLEFLAR-SF--PNFKALSLVSCDGFSTDGLTSIASHCRNLTELDIQENGID--DRGGSWLSYFPENFTSLETLNFANVS-K-EV-K-FDSLERLVAR--CKSLKVLKVNKNVTL-------------EQLQR---------LLV-KAP-QLMELGTGSFL--QEL--TNPQFAELENAF---NNCKNLHTLSGLWEV-----TSLCLPALYPACTNLTFLNLSYAA-LQSTELGK…
	Liriodendron_tulipifera_b3c9921 NR-ITSFPDEV----LERVLVFVKSHKDRSSVSLVCKDWYSAERWSRTHVFIGNCYSVSPEILVRRFPNIRSVTLKGK-PRFSD---------FNLVPP--NWGADIHSWLVVFASAYP-FLEELRLKRMTVSDESLEYLVR-SF--GNFRALSLVSCDGFSTDGLAAIATHCRNLTELDIQENGID--DLGGSWLSCFPESFTSLETLNFANLS-S-EV-N-FDALERLITR--CKSLKVLKVNKNVTL-------------EQLQR---------LLV-GAP-QLTELGTGSFS--QEL--TPRQSAELESAF---SHCKNLHTLSGLWEV-----SALYLPALYIACTNLTFLNLSYAA-LQSA…
	Aristolochia_elegans_PAWA2007365 KH-LSSFPDEV----LERVLLSIKSHKDRSSVSLVCKDWYNAERWSRTHVFIGNCYSVSPEILIRRFPNIRSVTLKGK-PRFSD---------FNLVPP--NWGANIHQWLTAFTSAYP-FLEELRLKRMTITDDSLEFLAR-KF--VNFRALSLVSCDGFSTEGLAAIATHCRNLTELDIQENGIE--DLGGSWLNCFPDTFTSLEVLNFANLI-T-EV-N-FDALERLVAR--CKSLKVLKVNKNVSL-------------EQSQR---------LLV-RAP-QLIELGTGSFS--QDL--TIRQYAELEAAF---SNCKRLHTLSGLWEV-----TSMYLPALYPACSNLTFLNLSYAC-LQS…
	Nymphaea_sp_PZRT201072 VV-VSSFPDEV----LEHVLAFVRSHKDRSAVSLVCKDWYAAERWTRSHVFIGNCYSVSPEILVRRFPNIRSITLKGK-PRFSD---------FNLVPA--NWGADIRSWLVVLAKAYP-FLEELRLKRMAVTDESLDYLSR-SF--PNFRALSLVSCDGFSTDGLASIATHCRNLMELDIQENDVL--DLGGNWLSCFPENFTSLEALNFASLN-S-EV-N-FDALERLVSR--CRSLKVLKVNKCVTP-------------EQLQR---------LLV-KIP-HLAELGTGSFF--QEP--TPRLTAELRNAF---SNCKKLHTLSGLWEV-----TPLYIPALSLACANLTFLNLSYSV-LQSTELAQLLAGC…
	Nymphaea_sp_PZRT201033 AR-VSSFPDEV----LEHVLVFLKSHKDRSAVSLVCKDWYAAERWSRTHVFIGNCYSVSPQILVRRFPNIRSITLKGK-PRFSD---------FNLVPP--NWGADIHSWLVVLAKAYP-FLEELRLKRMTVTDESLDFVAT-SF--PNFRALSLVSCDGFSTDGLASIATHCKNLTELDIQENDIL--DLGGHWLSCFPESFSSLEILNFASLN-S-EV-S-FDALERLLSR--CKSLKVLKVNKCVSP-------------EQLQR---------LLV-KVP-NLVDLGTGSFL--QEL--ALRQFAEVKSAF---SNCKKLHTLSGLWEV-----TSLYIPALSLACANLTFLNLSYAV-LQNTELAQLLAGC…
	Nuphar_advena_c1916e AR-VSSFPDEV----LEHVLVFVRSHKDRSAVSLVCKDWYAAERWSRTHVFIGNCYSVSPEILVRRFPNIRSITLKGK-PRFSD---------FNLVPP--NWGADIHSWLVVLAKAYP-FLEELRLKRMTVTDESLDFLAC-SF--PNFRALSLVSCDGFSTDGLASIATHCRNLTEMDIQENDIL--DIGGNWLSCFPENFTSLEVLNFASLN-S-EV-N-FDALERLVSR--CTSLKVLKVNKCVTP-------------EQLQR---------LLV-KVP-HLTEIGTGSFL--QEL--TLRQIAELKNAL---NNCKNLHTLSGLWEV-----TSLYIPALSLSCANLTFLNLSYAV-LQSTELAQLLAGCPQ…
	Nuphar_advena_c4334e AR-VSAFPDEV----LEHVLVFVRSRKDRSAVSLVCKDWYTAERWSRTHVFIGNCYSVSPEILVRRFPKIRSITLKGK-PRFSD---------FNLVPA--NWGADISLWLVVLAKAYP-FLEELRLKRMAVTDESLDYLAR-SF--PNFRALSLVSCDGFSTDGLASIATHCKNLTELDIQENDVL--DLGGDWLSCFPESFTSLEALNFASLN-S-EV-N-FDALESLVSR--CKSLTVLKVNKCVTP-------------EQLQR---------LLV-KVP-HLTELGTGSFL--QDL--SLRQIVELSNTF---SNCKKLHTLSGLWEV-----TSLYIPALSLACTNLTFLNLSYAV-LQSMELAQLLAGCPQ…
	Amborella_trichopoda_3_426 TH-VSAFPDEV----LENVLAFVKSHKDRSSASLVCKHWYEVERWSRNSVFIGNCYSLSPEILVKRFPNIRSITLKGK-PRFYD---------FNLVPP--DWGADVHSWLVVLAKAYP-FLEELRLKRMTVEDESLEFLGQ-SF--PNFKALSLVSCDGFSTDGLAAIASSCRNLEELDLQENGIK--DYGGHWLSCFPESFTSMVALNFANLN-S-EV-N-FDALERLVTR--CKSLKVLKLNRSVSL-------------EQLQR---------LLV-RAP-QLTELGTGSFS--QDL--SLKQYSELEQAF---SNCKSIHTLSGLWEV-----TSLYLPTIYPVCSNLKFLNLSYAG-LRSPELARL…
	Pinus_taeda_AFB6_jcf7180063161870 -S-SSTFPDEV----LEHVLLFVVSIKDRSAVSLVCKAWYRAEAWSRRKVFIGNCYSVSPEILVRRFPKITGITLKGK-PRFSD---------FNLVPP--HWGADIHPWLLVIRGAYP-WLRELRLKRMIVTDESLELIAR-SF--SDFRALSLTTCEGFSTDGLAVIATHCRNLQELDLQESEVD--DRGGYWLSCFPESCVSLVSLNFACLQ-S-EV-N-FDALQRLVAR--CISLRSLKLNKTLSL-------------EQLKR---------LLV-IAP-QLMELGTGSFF--QEL--SGPQTTDLENAF---KNCNKLRTLSGMWEV-----APLYLPALYSVCSNLTFLNLSYAN-IR…
	Podocarpus_rubens_XLGK2059638 TM-DVFLNDHL----LERILGFVEGDKDRNVASVVCKSWFVAEAWTRQRVFIGNCYALTPEFLVRRFPRVTSLRMKGK-PRFSD---------FNMVPP--RWGAEIMPWLKFLAEKYT-ALEELRLKRMVVTDESLRFIAR-SF--SSFKVLSLSTCEGFSTEGLAAITTHCRNLTELDLHECEIE--DRGGFWLS-FPESSNSLEILNFACVH-G-DI-D-VDSLERLVTR--CKSLKSLKLNKNISL-------------EQLRR---------LLV-KAP-QLVDLGTGPFS--EEL--T--QYADLELAF---RNCKRLKTLSFIGDM-----VPHNLCTLYCACTNLTFLNLSYTQ-LGSSDL…
	Cycas_micholitzii_XZUY2000678 GG-IPSFPEEV----LEHVLVFIVSNKDRNAVSLVCKAWYRAEAWSRRSVFIGNCYSVSPEIVVGRFPRIRSMRMKGR-PRFSD---------FNLVPP--KWGADIYPWLVVMASAYP-MLEELRLKRMTITDESLALLAH-CF--PNFRALSLSNCDGFSTDGLAIIATHCRNLTELDLQENEID--DQGGYWLSCFPESCTSLVSLNFACLN-S-VV-N-FDCLERLVAR--CTSLSSLKLNKTIDL-------------EQLQR---------ILV-KAP-QLTDLGTGSFS--QEL--SRGKYVDLVNVF---SNCKNLKSLSGFWEV-----VPLYLPVIYPVCSNLIFLNLSYAS-IRSLKL…
	Cycas_micholitzii_XZUY2000679 GG-IPSFPEEV----LEHVLVFIVSNKDRNAVSLVCKAWYRAEAWSRRSVFIGNCYSVSPEIVVGRFPRIRSMRMKGR-PRFSD---------FNLVPP--KWGADIYPWLVVMASAYP-MLEELRLKRMTITDESLALLAH-CF--PNFRALSLSNCDGFSTDGLAIIATHCRNLTELDLQENEID--DQGGYWLSCFPESCTSLVSLNFACLN-S-VV-N-FDCLERLVAR--CTSLSSLKLNKTIDL-------------EQLQR---------ILV-KAP-QLTDLGTGSFS--QEL--SRGKYVDLVNVF---SNCKNLKSLSGFWEV-----VPLYLPVIYPVCSNLIFLNLSYAS-IRSLKL…
	Podocarpus_rubens_XLGK2008898 ----PSFPDEV----LEHVLVFLTLPQDRNSVSIVCKAWYRAEAWGRRSVFIGNIYAVYPKAVVKRFPRLRSLTLKGK-PRFAD---------FNLVPP--KWGADVLPWLHALTSANP-MLEELRLKRMVVTDESLELLAD-SF--PNFHSLSLTSCEGFSTDGLASIAIKCRNLKELDLQENDID--DRGGYWLNCFPENCSSLLSLNFACLN-S-DV-N-FDALERLVAR--CTSLKCLKLNKTVSL-------------EQLQR---------LLV-KAP-QLTELGTGSYF--QEL--IPRQYGELETAF---NNCKHMEILSGFWEV-----SSLYLPAIYCVCSNLTFLNFSYAT-IQSQEL…
	Woodsia_scopulina_YJJY2013966 LP-PHPFPDEV----LEHVLAFISSHKDRNAVSLVCKAWLKADRWSRRNVFIGNCYSCSPQILTSRFPRVKALTLKGR-PRFSD---------FNLVPP--NWGANVLPWLHELAGKGP-FLEELRLKRMTVTDEGLFLVAQ-RF--PNFRVLVLTFCDGFSTDGLASIARNCRHLSELDLQECLID--DRGGEWLSSFPETCTSITSLNLTSLS-C-EV-D-FDDLERLVAR--CSHLEKLKLSRNITL-------------DQLRR---------LLLLRGP-SLKELGIGSFI--QDVS--GAGVDQLENMF---SKCKNIRLLSGFWEV-----VPLYLPLIYPICNKLKDLNLSESP-IGSSEF…
	Polypodium_glycyrrhiza_CJNT2081249 LL-PRPFPDEV----LEHVLAFISSHKDRNAVSLVCKAWLKADRWSRRSVFVGNCYSCSPQILTRRFPCVKALMLKGR-PRFSD---------FNLVPP--NWGANVLPWLHELAARGP-FLEELRLKRMTVTDECLCLVAQ-RF--PNFRVLALTFCDGFSTDGLATIASNCRHLSELDLQECLID--DRGGEWLSFFPETCTSLTSLNLTSLS-S-EV-D-FEDLERLVAR--CSHLEKLKLSRNITL-------------DQLRR---------LLLLRGP-SLKELGIGSFI--QDVS--GAGVDQLENMF---SKCQNMRVLSGFWEV-----VPLYLPLISPICNNLKDLNLSESP-I…
	Adiantum_tenerum_BMJR2014124 LP-PQSFPDEV----LEHVLAFVTSHNDRNSVSLVCKAWLKADRWSRRSVFIGNCYSCSPDILTRRFPRVKCLTLKGR-PRFSD---------FNLVPP--NWGANVLPWLQELALNDP-FLEELRLKRMTITDEGLSVLAH-RF--PNFRVLVLTFCDGFSTDGLATIVRNCRHLSVLELQECLID--DRGGEWLSSFPETCTTLTSLNITSLS-S-EV-S-FTDLERLVAR--CSQLEKLKLGRNITL-------------DQLRR---------LLLRQGP-SLKELGIGSFI--QDVN--GTGMDQLENMF---GRCRKIRALSGFWEV-----VPLYLPLIYPICHYLKELNLSESP-ITSSEFI…
	Lygodium_japonicum_PBUU2005497 IT-LCHFPDEV----LEHVLAFLTSHKDRNAVSLVCKAWSRAEALTRRSVFVGNCYACSPQIVSRRFPRVQSLTLKGK-PRFSD---------FELVPP--NWGANVMPWVLELANRGPLQLEELRLKRMTVTDDCLEVIAR-CF--PNFRILALT??DGFSTDGLAMITSQCRHLNELELQECVVD--DRGNRWIGAFPETFTALTSLNLTSFT-S-EV-N-FEDLERLVAR--CTRLEKLKLGHGITT-------------DQLRH---------LLVLRGP-NLIELGTGSFI--HEAG--RAELDQFENLF---SRCDKLRSLSGFFET-----MPFCLPLIYPIGCNLLFLNLSESP-VGCLE…
	Psilotum_nudum_QVMR2009419e ----SSFPDEV----LEHVLAFVTAHRDRNAVSLVCKAWYRAEAWSRRSVFIGNCYSVSPEMMASRFPRVRSLTLKGK-PRFAD---------FNFVPQ--NWGADVYPWVLELAKTGP-FLEELRLKRMTVTDQSLALMAH-YF--PNFRVLVMTLCDGFSTDGLALICRNCRHLEELDLQESVVD--ECDESWINCFPETCTSLTSLNISCLS-D-EV-D-FGSLEKLVGR--CTNLKSLKLNRTVTL-------------DQMQQ---------LLI-RAP-YLSELGTGSFF--EDLS--LTQIIELTNVV---NKCKNLRNLSGFWEV-----VPLYLPVIYPLCWNLNYLNLSYAA-IPSSEFEK…
	Sceptridium_dissectum_EEAQ2015751 GK-TSAFPDEA----LEHVLAFVTSHKDRNAVSLVCKAWCKAEAWTRRCVFIGNCYSVSPEMMASRFPRIRSLALKGK-PRFAD---------FNLVPP--NWGADVYPWIWELAKAGP-FLEELRLKRMTVTDESLALLAH-CF--PNFRVLVLTFCDGFSTDGLATICGNCRHLSELELQETVVD--ERGGNWIGCFPETCTSLTSLNFSCLS-D-EV-D-FEALERLVTR--CSNLKCLKLSRAVPL-------------EQMQQ---------LLL-RAP-QLTELGTGSFS--QDLS--YSRLSELENVI---LKCNKLKSLSGFWEV-----LPFYLPVIYPLCSNLNYLNLSYAG-IQ…
	Angiopteris_evecta_NHCM2014432e ???????????----?????????????????????????????????????????????????SRFPRIKSLTLKGK-PRFAD---------FNLVPI--NWGANVYPW????AMTGN-FLEELRLKRMTVTDESLALLAH-SF--PNFRVLVLTLCDGCSTD???????????????????????--???GDWLCCFPETFTSLTSLNFACLT-G-DV-S-FENLERLVAR--CTNLRSLKLNRSVTL-------------EEMLR---------LLL-RAP-QLTDLGTGSFF--QDLS--IAQLGELGQAL---SKCKSMKSLSGFWEV-----APLCLPIIYPVCPSLTYLNLSYAT-IRSS…
	Arabidopsis_thaliana_AFB4_AT4g24390 SS-PPPCPDHVLENVLENVLQFLTSRCDRNAVSLVCRSWYRVEAQTRLEVFIGNCYSLSPARLIHRFKRVRSLVLKGK-PRFAD---------FNLMPP--NWGAQFSPWVAATAKAYP-WLEKVHLKRMFVTDDDLALLAE-SF--PGFKELTLVCCEGFGTSGIAIVANKCRQLKVLDLMESEVT--DDELDWISCFPEGETHLESLSFDCVE-S-PI-N-FKALEELVVR--SPFLKKLRTNRFVSL-------------EELHR---------LMV-RAP-QLTSLGTGSFS--PDNV-QGEQQPDYAAAF---RACKSIVCLSGFREF-----RPEYLLAISSVCANLTSLNFSYAN-…
	Capsella_rubella_10006645m SF-EPPCPDHVLENVLENVLQFLTSRCDRNAVSLVCKSWWRVESQTRFEVFIGNCYSLSPARLTHRFKRVRSLVLKGK-PRFAD---------FNLMPP--NWGAQFAPWVVATAKAYP-WLEKVHLKRMLVTDDDLALLAD-SF--PGFKDLTLVCCEGFGTSGIAVVANKCRQLRVLDLLESEVT--DDEVDWISCFPAGETHLESLSFDCVE-S-PI-N-FKALEGLVVR--SPFLKKLRTNRFVSL-------------EELHR---------LMV-RAP-QLTSLGTGSFS--PDNV-QGAQEPDYAAAF---RACKSISCLSGFREL-----TPEYLPAISPVCANLTSLNFSYAN-ISPDMLKPI…
	Brassica_rapa_Bra013798 SS-SPPCPSHVLENVLENVLKFLTTRRDRNAVSLVSRSWHHVEAQTRFEVFIGNCYSLSPARLTRRFTRVRSLFLKGK-PRFAD---------FNLMPP--DWGAQFAPWVAATARAYP-WLEKVSLKRMFVSDDDLALLAV-SF--PGFKELVLLCCEGFGTSGVAVVANKCRQLKVLDLIESEVT--DDEVDWISCFPEGETHLESLSFDCVE-S-PI-N-FKALEGLVVR--SPCLKKLRTNRFVSL-------------EELHT---------LMV-RAP-QLTSLGTGAFS--STHD-QGEQEPDYASAF---RACRSLVCLSGFREL-----TAEYLPAISPVCANLTSLNFSYAN-ISPDVFKPIIRN…
	Arabidopsis_thaliana_AFB5_AT5G49980 SN-SQTFPDHVLENVLENVLQFLDSRCDRNAASLVCKSWWRVEALTRSEVFIGNCYALSPARLTQRFKRVRSLVLKGK-PRFAD---------FNLMPP--DWGANFAPWVSTMAQAYP-CLEKVDLKRMFVTDDDLALLAD-SF--PGFKELILVCCEGFGTSGISIVANKCRKLKVLDLIESEVT--DDEVDWISCFPEDVTCLESLAFDCVE-A-PI-N-FKALEGLVAR--SPFLKKLRLNRFVSL-------------VELHR---------LLL-GAP-QLTSLGTGSFS--HDEE-QSEQEPDYAAAF---RACKSVVCLSGFREL-----MPEYLPAIFPVCANLTSLNFSYAN-…
	Capsella_rubella_10026074m LT-SQPFPDHVLENVLENVLQFLDSRCDRNAASLVCKSWWRVEASTRSEVFIGNCYALSPSRLTQRFKRVSSLVLKGK-PRFAD---------FNLMPP--DWGANFAPWVSTMAKAYP-WLEKVDLKRMFVTDDDLALLAE-SF--PGFKELILVCCEGFGTSGIAIVANKCRKLKVLDLIESEVT--DDEVDWISCFPEDVTCLESLAFDCVE-A-PI-N-FKALEGLVAR--SPCLKKLRLNRFVSL-------------VELHR---------LLL-GAP-QLTSLGTGSFS--HDEE-QSEQEPDYAAAF---RACKSVVCLSGFREL-----MPEYLPAIYPVCANLTSLNFSYAN-ISPDMFKPI…
	Brassica_rapa_Bra000604 SS-SQTFPDHVLENVLENVLQFLDSRCDRNAASLVCKLWWKVEGLTRSEVFIGNCYALSPARLTQRFKRVRSLLLKGK-PRFAD---------FNLMPP--DWGANFAPWVSTMAKAYP-WLEKVDLKRMFVTDDDLALLAE-SF--PGFKELVLVCCEGFGTSGIAVVANKCRKLKVLDLIESEVT--DDEVDWVSCFPEDVTCLESLAFDCVE-A-PI-N-FKALEGLVGR--SPSLRKLRLNRFVSL-------------EELRR---------LLLLGAP-QLTSLGTGSFS--RGDQ-DEQGPPDYAAAF---RACKSVVCLSGFREL-----MPEYLPAILPVCANLTSLNFSYAN-ISPDMFKPIIHS…
	Cleome_hassleriana_1_128 VT-PPVCLDHVLENVLENVLQFLTSRCDRNAASLVCRSWFRVEALTRSEVFIGNCYALSPARLTRRFKRVRSLVLKGK-PRFAD---------FNLMPP--GWGANFAPWVAAMAKAYP-WLEKVHLKRMFVTDDDLALLAE-GF--PGFKELSLVCCEGFGTSGIAMVASKCRQLRVLDLIESEVT--DDEVDWISCFPEGEIHLESLTFDCVE-A-PI-N-FEALERLVIR--SPFLRKLRVNRFVSI-------------EELHR---------LMV-RAP-QITSIGTGSFS--PDNM-DPELETDYASAF---RACKSIVCLSGFREL-----MPEYLPAIYPVCANLTSLNFSYAN-ITPEMLKPVIR…
	Cleome_hassleriana_87_85 VA-PPPCLDHVLENVLENVLQFLTSRCDRNAASLVCRSWFRVEAFTRSEVFIGNCYALSPVRLTRRFKRVRSLVLKGK-PRFAD---------FNLMPP--DWGANFAPWVIAMAKAYP-WLEKVHLKRMFVTDDDLALLAE-SF--PGFKELSLVCCDGFGTSGIAMVASKCRQLRVLDLIESEVT--DDEVDWISCFPEGGTHLESLTFDCVE-A-PI-N-FQALERLVIR--SPFLKKLRVNRFVSI-------------EQLHR---------LMV-RAL-QLMSLGTGSFS--PDNM-DPEQEMDYASAF---RACKSIVCLSGFREL-----MPEYLPAIYPVCANLTSLNFSYAN-ITPEMFKPVIR…
	Gyrostemon_ramulosus_UAXP2000810 VT-PATCPDQVLENVLENVLQFLTSRVDRNAASLVCRSWCRVEALTRSELFIGNCYALSPARATRRFKRIRSVLLKGK-PRFAD---------FNLMPP--DWGAHFTPWVTAMALAYP-WLEKVHIKRMNVTDGDLRLLAE-SF--SGFKELVLVCCEGFGTKGLAIVASKCRQLRVLDLIESEVT--DDEVDWISCFPEGETCLESLTFDCVE-S-LI-N-FEALEWLVVR--SPSLTKLRVNRHVSI-------------EELHR---------LIV-RAP-QLASLGTGSFS--PSEILPGEQEPDYASAF---AACRSIVCLSGFRDI-----MPDYLPAVYPVCANLTSLNFSYAS-ISA…
	Gyrostemon_ramulosus_UAXP_2000808 DS-STPCLEHVLENVLENVLQFLTSRFDRNAASLVCRSWFRVEALTRSELFIGNCYAVSPARATRRFKRVRSLVLKGK-PRFAD---------FNLMPP--DWGAYFTPWAAAMAKPYP-WLEKVHLKRMSVTDDDLALLAE-SF--SGFKELVLVCCEGFGTDGLAIVASKCRQLRVLDLIESEVT--DDGIDWISCFPEGETCLESLSFDCIE-F-PI-N-FEALESLVMR--SPSLKKLRLNRFVSI-------------EELHR---------LMV-RAP-QLTSLGTGSFS--RTEIVQGEQEPDYSSTF---AVCKSIVCLSGFREL-----MPDYLPAIYPVCVNLTSLNFSYAN-IS…
	Carica_papaya_827_1 DS-QAPFPDQVLENVLENVLHFLTSRRDRNVASLVCKSWSRVEAMTRSELFIGNCYAVSPGRATERFRRVRSLVLKGK-PRFAD---------FNLMPP--NWGAYFSPWVSAMAKAYP-WLEKVCLKRMSVTDDDLALLAE-SF--SGFKELSLICCEGFGTSGLAIVASKCRKLRVLDLIESEVS--DDEVEWISFFPEGETCLESLIFDCVE-C-PL-N-FEVLERLVIR--SPFLKKLRLNRFLSI-------------GQLYR---------LIT-RAP-QLTHLGTGSFS--ALEFVQGEHEPDYASAF---AACKSLTCLSGFREI-----VPDYLPAIYPVCANLTSLNFSYAN-ITAEQLKPVISNCHKL…
	Moringa_oleifera_CZPV2012498 NP-QAPHPDQVLENVLENVLHFLTSRRDRNAASLVCKSWSRAEAMTRSELFIGNCYAVSPVRATERFRRVRSLVLKGK-PRFAD---------FNLMPL--NWGAHFSPWVAAMAKAYP-WLEKVCLKRMSVTDDDLALLAE-SF--SGFKELVLVCCEGFGTSGLAIVASKCRQLRVLDLIESEVT--DDEVDWISCFPEGETCLESLIFDCVD-C-PV-N-FAALERLVVR--SPLLKKLRLNRFVSI-------------GQQYR---------LMV-RAP-QLTHLGTGSFS--ASEVMQGDQEPDYVSAF---AACKSLVCLSGFKEI-----VPDYLPAIYPVCANLTSLNFSYAN-ITAEQLK…
	Tropaeolum_peregrinum_MYZV2013024 EI-QAPYPDQVLENVLENVLHFLTSRHDRNAASLVCKSWYRVEAMTRSELFIGNCYAVSPVRAAERFKRVHSLVLKGK-PRFSD---------FNLMPL--NWGAHFAPWLTAMAKAFP-CLESVCLKRMFVTDDDLALIAE-SF--SGFKELVLVCCEGFGTSGLAVLASKCRQLRVLDLLESEVT--DDEVDWISCFPEGETCLSSLVFDCVE-C-PI-N-FEALEKLVAR--SPFLKKLRLNRVISI-------------GQLNR---------LMV-KAP-QLTHLGTGSFG--PGVM-QEDQEPDYSSAF---AACKSLYCLSGFREI-----IPDYLPAIYPVCANLTSLNFSYAN-ID…
	Gossypium_raimondii_009G232000 EF-QSTYPDQVLENVLENVLHFLTSRRDRNAASLVCKSWYRVEALTRSELFIGNCYAVSPGRATARFTRVKALHLKGK-PRFAD---------FNLMPP--DWGAHFNPWALAMAKAYP-WLEKVHLKRMSVTDDDLATLAE-LF--LGFKELVLVCCDGFGTSGLAIFVSKCRQLKVLDLIESEVS--DDETDWISCFPEGESNLESLIFDCVE-C-HI-N-FEALDRLVAR--SPSLKKLKLNRYVSI-------------GQLYR---------LMV-RAP-QLTHLGTGSFS--PSDIAQGDQEPDYVAAF---AACRSLVCLSGFREI-----IPDYLPAIYPVCANLTSLNFSYAN-ITADQ…
	Gossypium_raimondii_010G036400 EF-QSPYPDQVLENVLENVLHFLTSRRDRNTASLVCKSWYRVEALTRSELFIGNCYAVSPARATARFTRVRALHLKGR-PRFAD---------FNLMPP--DWGAHFNPWVLAFAKACP-WLEKVYLKRMSVTDDDLATLAE-SF--LGFKELVLVCCDGFGTSGLSIFVSKCRQLKVLDLIESEVS--DDETDWILCFPEGESHLESLIFDCVE-Y-PI-N-FEALERLVAR--SPSLKKLKLNRYVSI-------------GQLYR---------LMV-QAP-QLTHLGTGSFS--PSEIAQGDQEPDYVTAF---AACKSLVCLSGFREI-----IPDYLPAIYPICANLTSLNFSYAN-ITAEQ…
	Theobroma_cacao_1EG034465t1e EF-QSPFPDQVLENVLENVLHFLTSRRDRNAASLVCKSWYRVEALTRSELFIGNCYAVSPDRATARFIRVRALHLKGK-PRFAD---------FNLMPP--DWGAHFNPWALALAKAYP-WLEKVYLKRMSVTDDDLATLAE-SF--SGFKELVLVCCDGFGTSGLAIFVSKCRQLRVLDLIESEVT--DDETDWISCFPEGESHLESLIFDCVE-C-PI-N-FEALERLVAR--SPSLKKLRLNRHVSI-------------GQLYR---------LMI-RAP-QLTHLGTGSFS--PLEVAQGDQEPDYVTAF---AACRSLVCLSGFREI-----IPDYLPAIYPVCSNLTSLNFSYAN-IDAEQLK…
	Citrus_sinensis_1g044749e EY-QSQYPDQVLEIVLENVLQFLTSRRDRNAASLVCKSWWRAEALTRSELFIGNCYAVSPDRARGRFRRVRSVVLKGK-PRFAD---------FNLMPP--DWGAHFGPWVCVLANAYP-WLEKVYLKRMSITDDDLALLAE-SF--SGFKELTLVCCEGFGTCGLAFIASKCRQLRVLDLIETEVT--DDEVDWISLFPEGETCLESLIFDCVD-C-AI-N-FEALEKLVAR--SPFLRKLRLNRHVSI-------------RQLYR---------LMV-RAP-QLTHLGTGKYG--PSEVAQGDTEPDYIAAF---AACKSLVCLSGFREI-----TPDYLSAIYPVCANLTSLNFSYAT-ITADQLKPVI…
	Fragaria_vesca_12066 DY-IIPYPDQVLENVLENVLCFLTARQDRNAASLVCKSWYRAEALTRSGLFIGNCYAVSPRRATARFTRVRAVSIKGK-PRFAD---------FNLMPP--NWGAHFRPWVSAMAKAYP-WLEKVYLKRMSVTDDDLALLAE-SF--PGFKELLLVCCDGFGTSGLAVVASKCRQLKVLDLIESEVL--DDDVDWICCFPESLTCLESLIFDCVE-C-HI-N-FEALERLVMR--SPLLKKLRLNRHVSI-------------GQLHR---------LMV-RAP-QLTHLGTGSFS--TLEGNQGDQELDYVSAF---AACKSLVCLSGFREI-----LPDQLPAIYPVCANLTNLNFSYAN-ITAEQLIPVIRHCHK…
	Prunus_persica_ppa003137m EY-SVPYSDQVLENVLENVLCFLTSRSDRNAASLVCKSWYRAEALTRSELFIGNCYAVSPRRATARFTRVRAVTIKGK-PRFAD---------FNLMPA--HWGAHLAPWVSSMAKAYP-WLEKLFLKRMSVTDDDLALLAE-SF--PGFKELVLVCCDGFGTSGLAVVASKCRQLRVLDLTESDVM--DDDVDWICCFPESQTCLESLMFECVE-C-LI-N-FEALEKLVAR--SPSLKKLSLNRFVSI-------------GQLYR---------LMV-RAP-QLTHLGTGSFN--TSEVMQGDQELDYRSAF---AACKSLVYLSGFREI-----LLDYLPAINPVCGNLTTLNFSYAN-INAEQLKSVI…
	Cucumis_sativus_311790 VG-GSGSVENILHNVLENVLHFLTSRRDRNAASLVCKSWYRVEALTRSELFIGNCYAVSPRRVTSRFSRVRSVSIKGK-PRFAD---------FNLMPD--NWGAHFTPWVAAMAKSYP-WLERVYLKRMSVTDDDLALLAD-SF--PGFKELVLFCCEGFGTSGIAVVAARCRHLRVLDLIDSDVG--DDEVDWISCFPEKETCLESLIFECVE-W-PI-N-FEALERLVSR--SPSLKKLGVNRHVSI-------------AQLYQ---------LMI-RAP-RLTHLGTGSFN--TLEAVHGESEPDYASVF---AACNSLVCLSGFKDV-----LPDYLPCIYPVCANLTTLNLSFAN-ITPEQLKPAIRHC…
	Cucumis_sativus_311780e AS-ASASAENILHNVLENVLHFLTSRRDRNAASLVCKSWYRVEALTRSDLFIGNCYAVSPRRVTSRFNRVRSVSIKGK-PRFAD---------FNLMPD--NWGAHFTPWVAAMAKSYP-WLERVYLKRMSVTDDDLALLAD-SF--PGFKELVLFCCEGFGTSGIAVVAARCRHLRVLDLIESDVA--DDEVDWISCFPEKETCLESLIFDCVE-F-PI-N-FEALQRLVSR--SPSLKKLGVNRYVSI-------------AQLYH---------LMI-WAP-RLTHLGTGSFS--TSEAVHGDSEPDFASAF---AACKSLVCLSGFKDI-----LPDYLPCIYPVCANLTTLNLSFAN-ITPEQLKPVISH…
	Medicago_truncatula_3g100860 EF-QSENPDHVLEIVLETVLHFLTSRRDRNAASLVCKSWYRTEALTRSDLFIGNCYSVSPRRATSRFSRIRSVTIKGK-PRFAD---------FDMMPV--DWGAHFSPWVTTFAAAYP-WLEKFHLKRMSVTDDDLSLLAD-SF--VGFKELVLVCCEGFGTPGLAAVASKCRFLRVLDLEESMVDVNDGILDWISCFPEGETHLESLGFDCVD-S-PI-N-FESLERLVAR--SPSLKRLRLNRHIKL-------------SQLYR---------LMY-KAP-HLTHLGTGSFV--VPEDTVGDDELIYETPF---AASKSLVSLSGFRDT-----LPEYLPAIYPVCANLTSLNFSYAD-IDTDQIK…
	Medicago_truncatula_5g065490 EN-PSPFPDQVLENVLENVLHFLTSRKDRNSASLVCRSWYRAEALTRSDLFIGNCYALSPRRAVARFSRIKSVTVKGK-PRFAD---------FDLMPV--DWGAHFAPWGRELAQGYP-WLEKLHLKRMNVTDDDLGVIAD-SF--AGFRELLLVCCEGFGTPGLAAIASKCRLLRVLELVESVIDAEDEEVDWVSCFPEGQTHLESLAFDCVE-C-PV-N-FEALERLVAR--SPNLKKLRLNRSVSM-------------VQLHR---------LML-RAP-QLTHLGTGSFC--ANENV--DQEPDYASAF---AACRSLVCLSGFREI-----WPDYLPAIFPVCANLTSLNFSYAD-VNAEQLK…
	Pisum_sativa_RMS2 EN-PSPFPDQVLENVLENVLHFLSSRKDRNAASLVCRSWYRAEALTRSDLFIGNCYALSPRRATARFSHIKSVTVKGK-PRFAD---------FDLMPV--DWGAHFTPWVTSLAQAYP-WLEKLHLKRMSVTDKDLGLIAD-SF--VGFRELLLACCEGFGTPGLAVIASKCRLLRVLELVESVIEVEDEEVDWVSCFPEGQTHLESLAFDCVE-C-PV-N-FEALEGLVAR--SPGLKKLRLNRSVSM-------------VQLHR---------LML-RAP-QLTHLGTGSFS--ANENV--DQEPDYASAF---AACRSLVCLSGFREI-----WPDYLPAIYPVCSNLTSLNFSYAD-VNAEQLKSVICHCHKL--…
	Populus_trichocarpa_005G159300 EY-LAPYPDQVLENVLENVLWFLTSRKDRNAASLVCRSWYRVEALTRSDLFIGNCYAVSPKRAMSRFTRIRSVTLKGK-PRFAD---------FNLMPP--NWGAHFAPWVSAMAMTYP-WLEKVHLKRMSVTDDDLALLAE-SF--SGFKELVLVCCDGFGTSGLAIVVSRCRQLKVLDLIESEVS--DDEVDWISCFPDTETCLESLIFDCVD-C-PI-D-FDALERLVAR--SPSLKKLRLNRYVSI-------------GQLYR---------LMV-RAP-HLTHLGTGSFS--PSEDVQVEQGPDYASAF---AACKSLVCLSGFREL-----IPDYLPAINPVCANLTSLNFSYAE-VSAEQ…
	Populus_trichocarpa_002G102700 EY-SAPYPDQVLENVLENVLWFLTSRKDRNAASLVCRLWYRVEAMTRSDLFIGNCYAVSPERATSRFTRIRSVTLKGK-PRFAD---------FNLMPP--NWGAHFAPWVSAMAKAYP-WLEKIHLKRMSVTDDDLALLAE-SF--SGFKELALVCCDGFGTSGLAVVASKCRQLKVLDLIESEVS--DDEVDWILCFPDTETCLESLILDCVE-C-PI-D-FDALERLVTR--SPSLKKLRLNRFVSI-------------GQLYR---------LMV-RAP-QLTHLGTGSFS--QSEDVQGELELDYGSAF---AACKSLVCLSGFREI-----IPDYLPAIYPVCANLTSLNFSYAN-ISAEQ…
	Ricinus_communis_29908_m006223 DY-QAPYPDQVLENVLENVLCFLTSRRDRNAASLVCKSWYRVEALTRSELFIGNCYAVSTRRATCRFTRIKSVTLKGK-PRFAD---------FNLMPP--NWGAHFAPWVTTMGKAYP-WLEKVHLKRMTVTDDDLALLAE-SF--SGFKELVLVCCDGFGTSGLAIVASRCRQLRVLDLIESEVA--DDEVDWISCFPESEMCLESLIFDCVE-C-SI-N-FDALERLVAR--SPSLKKIRLNRYVSV-------------SQLYR---------LMI-RAP-QLTHLGTGSFR--PSDDAQGEQEPDYASAF---AACKSLVCLSGFKEI-----LSDYLPAIYPVCANLNSLNLSYAN-ITADQ…
	Solanum_lycopersicum_04g074980 FN-FSPHPDQVLENVLENVLCFLTDRRDRNAASLVSKSWYRAEALTRSEVFIGNCYAVSPTRVTTRFKRVTSVAIKGK-PRFAD---------FSLLPP--DWGAHFTPWASVLGDSYR-GLEKLYLKRMSISDDDLGLLAR-CF--PNFKELVLVCCEGFGTSGLAIVARDCRQIRVLDLIESEVS--DDEVDWISYFPENKTCLESLTFDCVE-C-PI-D-FEALEKLVIR--SPSLKRLRLNRFVSI-------------TQLYR---------LMI-RAP-QLTNLGTGSFG--ASTV--DEPDPDYASAF---AACKSMVCLSGFREI-----APEYLPAIYPVCGNLTSLNLSYGN-INTEQ…
	Daucus_carota_012874e DY-SSPYPDQVLENVLENVLIFLTSRRDRNAVSLVCKSWYRAEALTRSEIYIGNCYSVSPRRAAERFRRVRSVVLKGK-PRFAD---------FSLMPP--DWGAHFAPWVIEMAEAYR-GLEKLYLKRMNVTDDDLAVMAR-SF--GNFRELVLVCCEGFGTAGLAVVASKCRQLRVFDLIEAEVS--DDEVDWLSCFPESGTCLESLIFDCVE-F-PI-N-FDALENLVAR--SRSLKKLRVNRFVNL-------------EQLHR---------LMI-LAP-QLTDLGTGSFS--PQDH-PIDQEPDLVSAF---TACRSLVSLSGFRET-----VPDYLPAVYPVCANITSLNFSYAN-ITADELKPVIRNCH…
	Daucus_carota_019294ps NN-VPLSPDEVLEIALESVLEFLPCQRDRNAFSLVNKSWNRIEAETRFEVVIGNCYSISPQRVVNRFKAIKSVVLKGK-PRFAD---------FSLLPP--DWGARFSPWVVVLSGAYR-GLEKLCLKRMYVSNDDLVVVAN-TF--VGFKEIRLVCCEGFGTSGLAVLAGKCRQLRVLELIEDEVA--DDEEDWISFFPGGATCLESLMFDCVE-C-PL-N-FNALEKLVAR--SPSLKKLRVNRYVSL-------------GQLRH---------LMI-IAP-QLTHLGTGSYG--PLEDLANELRDHVSSAF---AASKSLVCLSGFREI-----VPYFLPAVYPVCANLTSLNLSYAN-ILVEEFKQVISHC…
	Tetrastigma_voinierianum_SZPD2007172 EF-QSPSPDQVLENVLENVLLFLTSRRDRNAVSLVCKSWYRAEALTRSDLFIGNCYAVSPLRAIERFRRVRSMVLKGK-PRFAD---------FNLMPP--NWGAYFTPWVTAMATAYP-WLEKVYLKRMFVSDGDLELLAQ-SF--PAFKELVLVCCEGFGTNGLAVIASKCRQLRVLDLIEDEVS--DDEVDWISCFPENGTNLESLIFDCIE-W-PI-N-FEALERLVAR--SPSLRKLRLNRHVSI-------------EQLYR---------LMT-RAP-QLTHLGSGSFS--SSDIVQGDQEPDYVSAF---AACKSLVCLSGFREI-----VPDYLPAIYPVCANLTSLNFSYAN…
	Vitis_vinifera_GSVIVT01009126e EF-QSPSPDQVLENVLENVLLFLTSRRDRNAVSLVCKSWYRAEALTRSDLFIGNCYAVSPRRAIERFRRVRSVVLKGK-PRFAD---------FNLMPP--NWGAYFTPWVTAMATSYP-WLEKVYLKRMFVTDRDLELLAQ-SF--PAFKELVLVCCDGFGTSGLAGIASKCRQLRVLDLIEDEVT--DDEVDWISCFPESGTCLESLIFDCIE-C-PI-N-FEALERLVAR--SPSLRKLRLNRYVSI-------------GQLYR---------LMI-RAP-QLTHLGSGSFS--SSDIVQGDQEPDYISAF---AACKSLVCLSGFREI-----IPDYLPAIYPVCANLTSLNFSYAN-INTEQ…
	Aquilegia_coerulea_015_00210 SS-SSSGLTCFPEEVVDNVLVFLTSRQDRNNFSLVCKTWYKAEALTRYELFIGNCYSVSPNRAIQRFGKIKSLVLKGK-PRFAD---------FNLVPV--NWGAYFKPWINSMALAYP-CLEKIYLKRMCVSDSDLILLSQ-LL--LGFKDLVLDFCEGFGTNGLAAIATNCRQLRVLDLIEDVVLE--DGCDWISCFPEAETCLECLNFDCIK-T-PV-N-FEALEQLVAR--SPSLKKLRLNQLITI-------------EQLHR---------LMV-RAP-QIMDLGTGSFI--STGPVQVDLERDLSTAF---ANSRSLVSLSGFSDI-----VPDYLHTVYPVCANLLSLNFSYTS-INGGQFK…
	Aquilegia_coerulea_007_00541 DC-SSLYPDQVLENVLENVLVFLTSRKDRNSASLVCKSWYRTEALTRSDLFIGNCYAVSPHRVIQRFRKVQSLVLKGK-PRFAD---------FDLVPV--DWGAHFNPWVNTMSIAYP-SLEKICLKRMWVTNDDLIRLAS-AF--PGFKELVLVCCEGFGLSGLAMIADGCRQIRVFDLIECGVDY-DDGVDWLSYFPETGTCLESLIFDCVE-V-PV-N-FDALESLVAR--SPSLKKLRLNGTVTI-------------QELYR---------LIG-RAP-QLTHLGTGAFN--PMDAAGEEQELDLSSAF---DSLKYLTCLSGFRDM-----VAGYLPSIQPVCANLTSLNFSYAD-INAEQLK…
	Zea_mays_GRMZM2G024180 GG-RWAPPDQVLENVLETVLEFLTAARDRNAASLVCRSWYRAEAQTRRELFIGNCYAVSPRRAVERFGGLRAVVLKGK-PRFAD---------FSLVPY--GWGAYVSPWVAALGPAYP-RLQRICLKRMAVSDDDLALVAS-SF--PFLRDLSLVCCDGFSTLGLAVIAERCRHLRVLDLIEDYVEDDDELVDWISKFPESNTSLESLVFDCVS-C-PF-N-FEALEALVAR--SPALRRLRVNHHVSV-------------EQLRR---------LMA-RAP-QLTHFGTGAFR--SEGAPGGLAVTELATSF---AASRSLVCLSGFREV-----DPEYLPAIYPVCANLTSLNFSFAS-LTAAELKPAIRNC…
	Zea_mays_GRMZM2G427529 GG-RRAPPDQVLGNVLETVLQFLTAARDRNAASLVCRSWYQAEAQTRRELFIGNCYAVSPRRAVERFGGLRAVVLKGK-PRFAD---------FSLVPY--GWGAYVSPWVAALGPAYP-CLERICLKRMTVSDDDLALVAT-SF--PCFRDLSLVCCDGFSTLGLAVVAERCRHLRVLDLIEDYVEDDEELVDWISKFPECNTSLESLVFDCVS-V-PF-N-FEALEALVAR--SPALRQLRVNHHVSV-------------EQLRR---------LMA-RAP-QLTHFGTGAFR--SEGAPGGLAVTELATSF---AASRSLICLSGFREV-----DPEYLPAIYPVCAKLTSLNFSFAS-LTAAELKPVIRNC…
	Oryza_sativa_Os02g52230 GG-RWAPPDQVLENVLESVLEFLTAARDRNAASLVCRSWYRAEAQTRRELFIGNCYAVSPRRAVERFGGVRAVVLKGK-PRFAD---------FSLVPY--GWGAYVSPWVAALGPAYP-HLERICLKRMTVSNDDLALIAK-SF--PLFKELSLVCCDGFSTLGLAAIAERCRHLRVLDLIEDYIDEEEELVDWISKFPESNTSLESLVFDCVS-V-PF-N-FEALEALVAR--SPAMRRLRMNHHVTV-------------EQLRR---------LMA-RAP-QLTHLGTGAFR--SEPGPGALSVTELATSF---AASRSLICLSGFRDV-----NPEYLPAIHPVCANLTSLNFSFAN-LTAEELTPIIRN…
	Phoenix_dactylifera_30s889331g003 DT-PVPFSDQVLENVLENVLQFLSSPQDRNAASLVCLPWYRAEAQTRRELFIGNCYAVSPARAVERFPRVRALVLKGK-PRFAD---------FELVPA--GWGAGFSPWLAALATANP-WLERLCLKRMSVADSDLSLLAH-SF--PNFKELSLICCEGFSTAGLAVIAEKCRHLRVLDLIEDYLEGEEETVDWVSRFPETTTSLESLGFDCVG-S-AV-N-FEALEALVAR--SPSLRRLRVNHHVSV-------------EQLCR---------LMA-RAP-QLTHLGTGSFG--SAAAPGGCSVVDLARTF---AAFKSLVCLSGFRDV-----APHCLPAIYPVCANLTSLNFSFAN-IT…
	Phoenix_dactylifera_30s1085301g001e GA-PPPFSDQVLENVLENVLQFLSSRGDRNVASLVCRSWYRAEAQTRRELFIGNCYAVSPRRATERFRRVRAVVLKGK-PRFAD---------FGLIPN--NWGAHFHPWVCAMAAAYP-WLEKICLKRMSVADGDLSLLAY-SF--PNFKELSLICCEGFSTAGLAVIAEKCRHLRVLDLIEDYLEDDEEMSDWMSRFPETTTSLESLVFDCVG-S-AV-N-FEALEALVTR--SPALRRLRVNHHVSV-------------EQLRR---------LMA-LAP-QLTHLGTGSFG--SAGAAGGNNVVDLVNTF---AASKSLVCLSGFRDV-----APQYLPAIYPVCANLTSLNFSFAD-…
	Zea_mays_GRMZM2G095786 PC-ASPPADQVLDNVLETVLQFLDAPRDRSAASLVCRSWHRAESATRDSVAVRNLLAASATRAARRFPNARSLLLKGR-PRFAD---------FNLLPH--GWDASFRPWAAAVAGSFP-ALTSLYLKRIPVTDADLDLLSR-PL--PSFRDLTLHLCDGFTSRGLASIASHCRGLRVLDVVECDMAEEQEVVDWVAAFPPEPTNLESLSFECYE-P-PV-A-FATLEALVAR--SPRLSRLGVNLHVSL-------------GQLRR---------LMA-HAP-RLSHLGTGSFR--PAEGGGEAEFGEVVSAFVSAGRARTLVSLSGFRDL-----AQEYLPIIDVVCSHLKSLDLSYAA-VTPNQILMFIGQC…
	Zea_mays_GRMZM2G398848 PS-PSPPADQVLDNVLETVLQFLDAPRDRSAASLVCRSWHSAESATRESVAVRNLLAVSATRTARRFPNARSLLLKGR-PRFAD---------FNLLPH--GWDASFRPWAAAVAGAFP-ALTSLYLKRIPVTDADLDLLSR-SL--PSFRDLTLHLCDGFTSRGLASIASHCRGLRVLDVVECDMAEEQEVVDWVAAFPQEPSNLESLSFECYE-P-PV-A-FAALEALVER--SPRLRRLGVNLHVSL-------------GQLCR---------LMA-HAP-RLSHLGTGSFR--PADGGEGTGFGEVVSAFVAAGRARTLVSLSGFRDL-----AQEYLPTIAVVCAHLKSLDLSYSA-VTPNQILMFIGQC…
	Oryza_sativa_Os03g08850 PR-ASPPPDQVLDNVLETVLQFLDSARDRCAASLVCRSWSRAESATRASVAVRNLLAASPARVARRFPAARRVLLKGR-PRFAD---------FNLLPP--GWAGAFRPWAAAVAAAFP-ALASLFLKRITVTDDDLDLVSR-SL--PSFRDLSLLLCDGFSSAGLASIASHCRGLRVLDVVDCEMNDDDEVVDWVAAFPPGTTDLESLSFECYV-R-PV-S-FAALEALVAR--SPRLTRLGVNEHVSL-------------GQLRR---------LMA-NTP-RLTHLGTGAFR--PGDGPDGLDIEQMASAFASAGRTNTLVSLSGFREF-----EPEYLPTIAAVSGNLTNLDFSYCP-VTPDQFLPFIGQ…
	Phoenix_dactylifera_30s1102061g002e RG-GGGGAHPPP??????-??????????????????????????-????????????????????????????????-?????---------??????--??????????????????-??????????????????????????????????????????????????????????????????????????????????????????????????????????????????????????????????-------------?????---------?????????????????????????????????????????????????LSGFRDL-----APEYLPAICPACANLASLNLSYAD-…
	Phoenix_dactylifera_30s960401g001e PP-PPPFSDQVLENVLESVLQFLDCRRDRNAASLVCRSWCRAEGQTRRELFIGNCYAVSPARAVERFPRVRALVLKGK-PRFAD---------FELVPA--GWGAGFSPWLAALATANP-WLERLCLKRMSVSDADLSRLAR-SF--PSFRDLTLICCDGFGTVGLAAIAEHCRHLRVLDLIENDVE--DQGLDWVSRFPESTTSLESLVFDCVG-C-EV-N-MDALEALVAR--SPSLRRLRVNQRVSV-------------RQLRS---------LMV-RAP-QLTDLGTGSFG--EGGEVGEVEVADLEAAF---AASRSLVCLSGFRNH-----APQFIPAIYPVCANLISLNLGYSV-I…
	Ananas_comosus_002748 GS-AVPFSDRVLEIVLENVLQFLTSRRDRNAASLVCRSWYRAEAQTRRDLFIGNCYAVAPRRATERFRGVRSIVLKGK-PRFAD---------FSLVPY--GWGAHFSSWLFAMAPVYP-WLERICLKRMTIADDDLSRIAH-SF--PLFKDLTLICCDGFSTVGLAIIADKCRHLRVLDLIEDYLEDEDEVVDWISRFPETTTSLESLVFDCVA-G-AF-N-FEALEALVAR--SPGLRRLRVNHHVTL-------------EQLRR---------LMA-RAP-QLTHLGTGAFR--SGSVG-AEAELDLTSSF---AASKSLVCLSGFREV-----EPEYLPAIYLVCANLTSLNFSFAN-LTAEELKPVIQHCR…
	Ananas_comosus_004045 DA-APAMWGQILENVVENVLQFLTCRRDRNAASLVCRSWHRAEARTRGDVFVGNAYAVSPGRVAQRFPALRSLLLKGK-PRFAD---------FNLVPP--GWGASLSPWAQSAASSFR-SLERLTLKRLSLSDADLSLLAR-SL--PSFRDLTLLCCDGFGTPALAALAEHSKQLRVLDLIDNDLADDEDAVDWVSRFPAAATSLESLSFECVA-F-AV-G-FDALEALVAR--SPRLRRLRVNQHARH-------------DWVSR-----------F---PAAATSLESLSFC--VAF---AVGFDALEALV---ARS---TCLSGFRDL-----APDYLPAILPVCPNLTSLNLSYAD-ISAHQLRPAISQCH…
	Ludovia_sp_VVVV2009273 DA-SPPFSAQVLENVLENVLQFLTARRDRNAASLVCRSWYRAEAQTRADLFIGNC?AAPPRRAADRFRRARAVVLKGK-PRFAD---------FSLVPP--GWGARFAPWAAAMAPAYP-WLEKLCLKRMTVADDDLALLAA-SF--PNFRELVLYCCDGFGTAGLAAVAEKCRNLRVLDLIENDVEDDDEVVDWISKFPPTTTCLESLVFDCVH-C-AV-N-FEALEALVAR--SPSLRRLQVNQHVSI-------------GQLCH---------LMV-RAP-QLTHLGTGSFR--PAQG---EQEIDLEPFF---AASKSMVSLSGFRDL-----APEYLPAVYPVCANLTSLNLSYAD-ITAEQLKPVITRC…
	Persea_borbonia_WIGA2017371 ????????????????????????????????????????????????????????????????????????????????????---------?????????????????????????????????????????????????????????????????????????????????QLRVLDLIED-VMDDDEDVDWLSCFPDSGTCLESLSFDCVE-C-QV-N-FEALEALVAR--SPLLKKLRLNRNISV-------------AQLQR---------LML-GAP-QLTHLGTGSFS--SADP-QGEQEVDLHSAF---GTCRSLVCLSGFRDV-----VPDYLPAIVPVCANLVSLNFSYGN-ITCEQLRT…
	Aristolochia_elegans_PAWA2012787 SA-SAACPDQVLENVLENVLCFLTSRRDRNAASLVCKSWYHAEALTRSELFIGNCYAVSPQRTIERFTAVQAVVLKGK-PRFAD---------FDLVPE--KWGAFFRPWAAAMGAAYQ-RLEKLCLKRMTVTNEDLSLAAR-SL--PMFRELVLICCDGFGTIGLAEVASMCRQLQVLDLIEDEVI--DEEVDWISSFPETTTCLESLTFDCVE-S-EV-N-FDSLESLVAR--SPMLKKLRLNRHISV-------------GQLQR---------LML-RAP-QLTHLGTGSFS--SPDAGGDQQEVDLSAAF---STCRAITCLSGFRDI-----LPDYLSAITPVCANLTSLNFSYAN-INS…
	Liriodendron_tulipifera_b3c1209 SS-SSASPDQVLENVLENVLHFLTSRRDRNAASLVCKSWYRVEALTRSELFIGNCYAISPRRAVDRFRRIRAVVLKGK-PRFAD---------FNLVPP--NWGAHFATWVSALANGCP-GLEKLFLKRMSVTYDDLSTLAH-SF--PGLKELVLVCCEGFGTSGLAVIANECRQLRALDLIDDDVM--DDEVDWVAAFPDTHTCLESLIFDCVE-C-PV-N-FGTLERLVAR--SPSLKKLKLNRHVSV-------------EQLQR---------LML-RAP-QLTHLGTGSFS--STEMT-GDQEVDLYSAF---AACKSLICLSGFRDI-----VPDYLPSITPVCGNLTALNFSYAN-ISSE…
	Illicium_floridanum_VZCI2009661 DP-QSSFPDEILENVLENVLHFLTSRTDRNSVSLVCKSWKRAEAMTRSELFIGNCYSVSPSMAINRFRNVKSLVLKGK-PRFAD---------FNLVPP--NWGAHFTPWITAMAPAYI-GLEKLFLKRISVTDHDLSVIAH-SL--PCFKELVLVCCDGFGTSGIAIVASKCRQLRVLDLIEDDVM--DDEIDWLSCFPETTTYIESLSFDCLD-S-QV-N-FDALERLVAR--SPSLKKLRVNRHVPV-------------GQLQR---------LML-RAP-QLTHLGTGSFS--FNPEN-QNQELDLLAAF---SACKSLCCLSGFREI-----ALDFLPSIFPVCSNLTSLNFSYAN-ITGE…
	Illicium_floridanum_VZCI2008813y2104267 SS-SCYPPDQVLENVLENVLRFLTYRTDRNAASLVCKSWKKAEAMSRTELFIGNCYSISPQMVINRFRSIKSVILKGK-PRFAD---------FNLVPP--NWGAHFSPWISAMAPAYL-GLEKLLLKRMSVTDHDLSLLAH-SL--PCFRELVLVCCEGFGTVGIAIIASKCRQLRVLDLIDDDVIEEDDEIDWLSCFPETTTCLESLSFDCLD-S-PV-N-FDALEGLVAR--SPLLKKLRVSRNVSI-------------GQLQR---------LLL-RAP-QLTHLGTGGFN--LDNNV-QDQELDLTAAF---ATCKSLSCLSGFKEI-----LLDYLPSIYPVCCNLTSLNFS…
	Nymphaea_sp_PZRT2008436y7 ET-ESSFPDEI----LEHILGFISERKDRNAFSLVCKSWFRLEAMNRRHCFIGNCYAASPEILIRRFPMVKSLVLKGK-PRFAD---------FNLVPQ--NWGAHLGPWVVAMVPAYP-WLESLHLKRMSVRDEDLDIIAN-SL--PKFKQLIIDCCDGFSTGGLASIASKCRELTDLELSEDHID--DNGADWLSCFPET-TSLVSLSFECLN-S-DV-N-FDALERLVAR--SPSLKKLRLNNSVSI-------------SQLLK---------LMT-KAP-QLTHLGTGSFR--DEVT--PELALQLSAAF---KRCKELKYLSGFYDF-----MPEYLQLIWPVCASLTSLNLSYAP-IASDELEEII…
	Nuphar_advena_c6523 ---RSAFPDEV----LEHVLGFISERKDRNAVSLVCRSWCKLEALNRRHCFIGNCYAASPEILIRRFPMVKSLVLKGK-PRFAD---------FNLVPQ--NWGAHLGPWIVAMVPAYP-WLESLHLKRMSIRDKDLALIAN-SL--PKFKKLIIDYCDGFSTGGLASIASKCRELTDLELSEDHID--DN?EDWLSCFPETTTSLVSLSFECLN-S-EI-N-?DALERLVAR--SPSLKKLRLG?SVSI-------------SQLLK---------LMT-RAP-QLTHLGTGSFC--DEVT--PELALQLSAAF---KQCKELEGLSGFYEF-----MPEYLQLIWPVCANLTSLNLSYAP-IASDELEEIICLCHKL…
	Amborella_trichopoda_135_41 DL-QAAFTDDV----LESVLRFVTHRRDRNAVSLVSQAWYKVEARTRSEVFIGNCYAIEPERVAERFDRVRTLVLKGK-PRFAD---------FDLVPH--NWGAHFSPWVRAIAQGFQ-WLERVSLKRMSVTDEDIGVLAR-VF--PGFKELSLVCCDGFSTKGLAVLAGGCRQLRGLELIEDDVD--D-GVDWLACFPETTTSLVSLCFDCVE-C-AV-N-FDALESLVAR--SRSLKKLTLNRHVSV-------------GQLQR---------LML-RAP-QLTHLGTGSFS--PDPNA-PDQEVDLVSAF---NACKFLHCLSGFREI-----LAEYLPAISPVCANLTSLNLSLAD-ITAAELEA…
	Pinus_taeda_AFB4A_jcf7180063005822plus IQ-SSSFPDEV----LEHVLVFLSSQKDRNFVSLVCKAWHRVEAWTRQQVFIGNCYAVSPQIMIKRFPKIKSVSLKGK-PRFAD---------FNLVPP--NWGAHLTPWVSAMATAYP-LLERLYLKRMTITDYDLTLLAN-SF--LYFKELVMVCCDGFSTGGLASIASKCRQLTTLDLNEDEIH--DNGEDWLACFPETLTSLRSLCFDCLE-G-PV-N-FDALERLVAR--CPSLKKLRLNRNVSI-------------VQLQR---------LII-KAP-QLTHLGTGSFF--YEFQ--LEQVADLLAAF---SNCKQLQCLSGFREV-----VPEYIPAVYPVCSNLTSLNFSY…
	Cycas_micholitzii_XZUY2043171e EM-ESSFPDEV----LEHVLVFLTTHKHRNAVSLVCKAWYRVEKWTRQQIFIGNCYAVSPQIMINRFPRIKSVT????-??--?---------??????--NWGAYLNPWVSAMSRAYP-WLERLFLKRMTVTDYDLSVIAN-SF--PNFKGLVLVCCDGFSTGGLATIASKCRQLTELDLDEDEVM--DNGVDWLACFPEITTSLVSLSFDCLD-G-PI-N-FDALERLVAR--CPSLKKLRLNRAVSI-------------VQLHR---------LIL-RAP-QLTHLGTGSFC--YEFI--PEIGADLQTAF---SSCKQLQCLSGFREL-----SLEYLPTVYPVCSNLTTLNFSYAV-VRGRE…
	Podocarpus_rubens_XLGK2007916 EM-ESTFPDEV----LEHVLVFLTSHKDRNAVSLVCKAWYRVEAWTRQQIFISNCYAVSPEKVIDRFPKIKSVTIKGK-PRFAD---------FNLVPP--NWGAYLTSWLSVMASAYP-SLERLCLKRMTVTDEDLTLLAN-SF--SSFKELVLICCDGFSTTGLSVIVSKCRELKELDLSEVEVE--DSGVDWLAFFPEITASLVSLCFDCME-T-PI-N-FDALEKLVAR--SPSLKKLRLNRAVSI-------------EQLHR---------LIL-RAP-QLTHLGTGSFG--YEFF--PEQGASLLEAF---NNCRQIECLSGFREA-----VSDYLPAVYPVCTNLTSLNLSYAV-VRSHDL…
	Pinus_taeda_AFB4B_jcf7180062969053 PI-ETSFPDEV----LEHVLVFLTAHKDRNAVSLVCKSWYRVEAWTRHQVFIGNCYALSPGTMINRFPKIKSVTLKGK-PRFAD---------FNLVPP--NWGAHLHPWVLAMAPAYP-WLEKLLLKRMTVTDEDLALLAD-SF--PNFKDLVLLYCDGFSTKGLGIIASKCRQLRRLDLNEDDIV--DSGVDWLSCFPETTTTLECLSFECLE-G-PI-N-IDALERLVAR--CLSLKELRLNRTISI-------------VQLHR---------LML-RAP-QLTHLGTGCFS--YDFI--PEQATVLQVAF---NNCKSLQCLSGFREV-----VPEYLPTIYSVCNNLLELNLSYAV-M…
	Podocarpus_rubens_XLGK2060230 NG-ELCFPHEV----LEHVLGFIKGHKDRNSVSAVCKSWFKVEACCREHVFIGNCYAASPSTMIKRFPKVKSLTLKGK-PRFAD---------FNLVPR--SWGAYACSWVSAMGPAYP-KLESLCLKRMTITDNDLSLIAT-SF--LNFKDLTLFYCDGFSTSGLALIVAKCRELRRLDLNEDDIT--DNGVDWLSCFPEKTTTLECLAFDCLD-S-PV-N-FDALEKLVAR--SPSLKELRLNSSVSI-------------VQLHR---------LML-RSS-QLTHLGTGCFS--HDFV--PEQATSLQLAF---NNCKSLESLSGFQDV-----VLEYLPAIYPVCNNLTDLNLGYAV-IDSGEL…
	Podocarpus_rubens_XLGK2008643 EA-HPLFPYEV----LEKVLAFVESHKDRNAVSMVCKAWYKVESWTRTEVFIGNCYAVSPEIMVRRFPKIKSVILKGK-PRFAD---------FGLIPP--NWGANVHPWVSAMGLVYP-WLEKIHLKRMHVTDDDLSEIAG-SF--PGLKQLVLVCSDGFSTTGLAMFVSKCRYLRELTLNDLEVV--D--IDWIGCFPETTTSLVSLNFDCLE-G-PI-N-FDALERLVAR--SPFLKMLRPNKYVSV-------------IQLQR---------LLW-RAP-QLTHLGTGSFG--PEF--DEEQESNLYELF---RKCKSIQCLSGFHEI-----APEYLSALLPVCRNLTSLNFSYAY-LHSREI…
	Cycas_micholitzii_XZUY2007648e DM-ESSFPYEV----LEHVLVFLTSHRDRNAVSLVCKAWCRAEASTRQEVFIGNCYAVSPQIMVERFPKIKSVTLKGK-PRFAD---------FNLVPP--NWGAHLNPWISAMARAYP-WLERLCLKRMSVTDDDLYILAH-SF--PLFKELVLVCCDGFSTSGLAIIASKCRQLAELNLNEDEVM--DTGVDWLGFFPETTTTLVSLNFDCLE-G-PI-N-FDALERLVA?--???????????????-------------?????---------???-???-???????????--???????????????AF---GKCKSLQCLSGFREI-----VLEYLPAIYPVCCNLTSLNFSYAI-IGSRE…
	Woodsia_scopulina_YJJY2013306 EM-LLPLTDDL----LEHVFEFITSHRDRNAVSLVCKAWNSLEASGRQHVFVGNCYAVSAERVAQRFTRLKSLTLKGK-PRFAD---------FDLVPR--NWGAFVQPWIKTLSLSHH-FLEELRLKRMTLSDDCLELIAS-SF--PHFKALVLTSCDGFSTDGLASIAEKCKHLTHLELTENILN--YKTGAWLSAFPTDCSSLVSLNFEDLD-HEDV-D-FEALERLVSQ--CKGLKTLKLNRAVPL-------------AFLQK---------LLS-KCP-QLTELGTGSFS--PAV--SREEQANACNSF---KNCTQLQTLSGFWVV-----TPGHLSVVYPLCSNLVSLNLSYSP-ICDGEL…
	Polypodium_glycyrrhiza_CJNT2013689 EM-PLSLTDDL----LEHILKFITAHKDRNAVSLVCKAWNSLEAAGRQHVFVGNCYAVSAERVAQRFARLKSLTLKGK-PRFAD---------FDLVPR--NWGAFVQPWIQTLLLTHP-FLEELRLKRMTLSDDCLELIAS-SF--PNFKALVLTSCDGFSTDGLASIAANCRHLTHLELTENILN--HKTGAWLSAFPPACSSLISLNFEDLD-HDDV-D-FEALQRLVSQ--CKGLKTLKLNRAVSL-------------AHLQR---------LLP-TCR-QLVELGTGSFS--PAV--SREEQANACDAF---?NCSQLQTLSGFWVV-----TPGYLSVIYPICSNLVSLNLSYSP-I…
	Adiantum_tenerum_BMJR2007379 VS-PLPLTDDL----LEHAFKFITDHRDRNAVSLVCKAWNALEANGRRHVFVGNCYAVYADRVAQRFPGFTSLTLKGK-PRFAD---------FDLVPH--NWGAFVLPWMNVLSVSHP-FLEELRLKRMTLSDECLELIAA-SF--PQFQKLVLMSCDGFSTDGLASIAANCRRLTHLELTENNLT--YKSGSWLHSFPAGCNSLVSLDFEDLD-HDDM-D-FDALEGLISR--CKGIRALKLNRAVSL-------------VQLQR---------LLL-NCP-QLMELGTGSFS--PGV--PREEQAKLCDAF---RKCSQLRTLSGFWVV-----TPGHLSVIYPLCSNLVSLNLSYSP-ICDGELA…
	Azolla_filiculoides_s0065_g035892 GE-GTALSEDV----MEHVLSFITCHRDRNAVSLVCRSWNVLEASGRRSVFIGNCYAVSPQRATERFTRFSSLILKGK-PRFAD---------FDLLPR--HWGAFVEPWIHALSVSHR-FLQDLRLKRMTLSDHALHLLSH-SF--PHFNVLVLTSCDGFSTHGLASIAANCRSLTHLELTENTLH--SKSGAWISAFPPGFTSLVSLDFEDLE-H-EV-D-FHALESLITR--CTGLKTLKLNRSVTI-------------GHLRH---------ILS-KSP-NLSVLGTGSFS--PSM--SREEFLDACNVF---RGCKKLHTLSGFWVV-----APGYLSVINPIGANLVAVNLSYSP-IC…
	Azolla_filiculoides_s0005_g009183 ET-FSLVDEDS----LAHILGFITTHKDRNAVSLVCKSWNLLESSVRKEVYVGNCYAISPDRVARRFANLKSLVLKGK-PRFAD---------FDFVPR--DWGAFVDPWIGALRSSHP-FLEELRLKRMTLSDECLSLAAT-SF--PNLKVLSLTSCDGFSTEGLTSITANCRYLTHLELTENTLD--QVSGTWLNAFSPGCTSLVSLDFKDLD-H-DL-D-FEALESLVNR--CTGLEILKLNRAVSL-------------TQLKL---------LVS-KLP-HLTELGVGSFS--PAV--PVEDQTSLSVCL---RNCTQLRSLSGFWII-----TPGYLSIIYPICSTLVSLNLSYSP-IC…
	Salvinia_cucullata_v1_1_s0032_g010765 EK-PFKLTDDI----LCHILGFVKEHRDKNAVSQVCKAWNAVEAMARKEVYVGNCYAVKAERVAERFSRMRTLVLKGK-PRFAD---------FDLVPR--NWGAFAEPWIRTLSSSHG-HLQELRLKRITLSDNCLFLAST-SF--PSLHSLSLTSCDGFSTDGLAFIASNCRNLTHLELTENSLE--DVSGTWLTAFSDSCTSLVSLDFKDLD-H-DV-D-FDALESLVTR--CTGLKTLKLNRAVSI-------------LQLQR---------LVS-KLP-ELVELGVGSFS--LQV--SLEDQVILSNCL---RNCTRLRSLSGFWIV-----NPGYLSIIYPICANLVSLNLSYS…
	Lygodium_japonicum_PBUU2078568 ???????????----?????????????????????????????????????????????????????????????????????---------??????--??????????????????-??????????????????????????????????????????????????????????????????????????????????????????????????????????????????????????????????-------------?????---------???????-??????TGSFT--AEL--TPEDLVDIRNAF---AGCRQLQSLSGFWEV-----SPGHLALIYPVCSNLVSLNLSYSP-ISDGE…
	Equisetum_hymale_JVSZ2007197e GA-GSPFPDDV----LEHVLRFLSAHKDRNAASLVCKSWYKVEASSRTHVFIGNCYSVSPERLVERFPRIRSVTLKGK-PRFAD---------FDLVPE--NWGAHVRPWVQAFSRFYP-FLEELRLKRMTISDECLNLIAR-SF--AGFKVLSLTTCDGFSTNGLAMIAACCKELTHLDLTENSVE--DSSGTWLSDFPETCTSLVSLNFENLN-S-EV-D-FEALEKLVSR--CKNLKALKVNKSITL-------------SQLQQ---------LML-KAP-QLVELGTGSFS--EDL--FQEGLDRLENTF---SNCRELQSLSGFWVV-----APGYLSVIHQTCSNLTSLNLSYSP-ITDGDL…
	Equisetum_hymale_JVSZ2014825 SC-SSPFSEDI----LENILRFVNAHKDRNAVSLVCKTWYKVEARTRTRVFIGNCYSVSPERLVERFPRIRSVTLKGK-PRFAD---------FDLVPE--NWGARVHPWIQVFSRSYP-FLEELRLKRMTISDDCLSMIAK-FF--PNFKVLSLTTCDGFSTNGLAMIAACCRELTQLDLTENAVE--DSSGAWLSHFPESCTSLVSLNFENLN-S-AV-D-FEALERLVNR--CKSLRTLKLNKFVTL-------------TQLQR---------IMS-IAP-QLVELGTGSFS--EEL--GQEDLARIQNSF---VNCSGLQYLSGFWLV-----MPGYLSVIHQTCSNLTSLNLSYSP-ITDRDLA…
	Psilotum_nudum_QVMR2005872 EM-PSPFPDDV----LEHALQFITSHKDRNAVSQVCKAWHKVESYCRQHVFIGNCYAVSPERLVERFPNIRSVTLKGK-PRFAD---------FDLLPP--DWGAHVLPWITAFADAYP-FLEELRLKRMTVSDESLLLIGH-SF--SHFKALILISCDGFSSDGLAMVTGNCKHLTQLDLTENAVI--DESGTWLSNFPETCTSLVSLNFENLQ-S-EV-E-FEALEKLVSR--SKALRTLKLNRSISL-------------SQLQS---------LLF-KTS-QLTELGTGSFF--QEL--TPAEHISLQSAF---GTLKELRSLSGFWEV-----SAAQLPAIYPVCSNLLSLNLSYSP-I????????…
	Psilotum_nudum_QVMR2055186e EM-PSPLPDDV----LEHALKFVKSHKDRNAVSLVCKAWHKMEAYCRQCVFIGNCYAVSPERLVERFPNIRCVTLKGK-PRFAD---------FDLVPR--DWGAHVLPWITAFANAYP-FLEELRLKRMIVSDESLLLISH-SF--PLFKSLVLTSCDGFSSLGLAMITGNCKHLTHLDLTENTVV--HESG??????????????????????-?-??-?-?????KLVSR--CSAMRILKLNRSISL-------------SQLQS---------LLL-NAV-QLTELGTGSFF--QEL--TSEEHVRLQSSF---SNLKELQSLSGFWEV-----SAAQLPVIYPVCSNLLSLNLSYS?-????????…
	Sceptridium_dissectum_EEAQ2089860 EM-PYPFPVDV----WEHVLRFITAHKDRNAVSLVCKAWYKVEAYGRQRVFIGNCYAVSPERLVERFPNIRSVTLKGK-PRFAD---------FDLVPK--NWGAHVHPWVMAFARGYP-SLEELRLKRMTISDESLALIAH-SL--PNFKALVLTSCDGFSTDGLAILASTCKHLSQLDLTENDVI--DKSGSWLSCFPETCTSLVSLNFENLQ-S-EV-D-FETLEGLVSR--CTGLKTLKLNRLISL-------------SQLQC---------LLL-KAS-NLTELGTGSFS--QEL--MLDEHAKLQSCF---ANCRALQSLSGFWEV-----LPTQLRVVYPVCSNLISLNLSYSP-IS…
	Psilotum_nudum_QVMR2009847e ---------------LEHVFRFITSHKDRNAVSLVCKAWYKVEAHSRQRVFIGNCYAVS???LVERFPRIKSVTLKGK-PRFAD---------FDLVPP--NWGADVQQWVRVFAREVP-FLEELRLKRMTVSDDSLALIAH-YL--PNFKILVLTSCDGFSTDGLALITSNCKHLTHLDLTENSVI--DKSGSWLSSFPDTCTSLVSLNFENLE-S-EV-E-FESLERLVSR--CTTLKTLKLNRAISL-------------?????---------???-???-???????????--???--????????????---???KELQSLSGFWEV-----APAHLSVVYPVCSNLISLNLSYSP-ISDMEL--…
	Angiopteris_evecta_NHCM2010885 EM-PSPFHDDV----LEHVLKFITSHKDRNAVSQVCRAWYKTEAHSRQRVFIGNCYAVSPERLVERFPRLKSVTLKGK-PRFAD---------FDLVPR--DWGAHVYPWVLAFSKAYP-SLEELRLKRMTVSDECLELIAR-FF--PNFKILVL?GCDGFSTDGLGLIALNCKQLTQLDLTENGVI--DKSGTWLSCFPETYTSLVSLNFENLE-T-EV-D-FEHLERLVAR--CTSLRSLKLNRLISL-------------HQLQR---------LLS-RAS-QLVELGTGSFS--QEL--PLEEHSKLQNLF---NNCSKLQALSGFWDV-----APSHLPVIYPVCSNLTSLNLSYSP-ISDVE…
	Polypodium_glycyrrhiza_CJNT2002396 EA-LAFFLDDV----LEHVLQFMTSDKDRNNVSLVCKSWYEVEAQSRRRVFIGNCYSISPERVIKRFHKVTSVTLKGK-PRFSD---------FDLLPS--NWGAHALPWVEAFCKAYP-HLEELRLKRMTICDTSLRMIAM-HL--IHFKRLTLITCDGFSSDGLASIAKHCKYLECLDLTENKVE--SLSGSWLCEFHEVCRSLVSLNLQNVH-G-DL-S-FEALEGLVGR--CTMLESLKLNSSISL-------------TQMQR---------LLY-RAP-QLRELGTGSFS--EEI--TADDFSRLQSCF---STCRKMTSLSGFWEV-----GQGCLPVIYPVCESLISLDLSYTP-V…
	Polypodium_glycyrrhiza_CJNT2002398 EA-LAFFLDDV----LEHVLQFMTSDKDRNNVSLVCKSWYEVEAQSRRRVFIGNCYSISPERVIKRFHKVTSVTLKGK-PRFSD---------FDLLPS--NWGAHALPWVEAFCKAYP-HLEELRLKRMTICDTSLRMIAM-HL--IHFKRLTLITCDGFSSDGLASIAKHCKYLECLDLTENKVE--SLSGSWLCEFHEVCRSLVSLNLQNVH-G-DL-S-FEALEGLVGR--CTMLESLKLNSSISL-------------TQMQR---------LLY-RAP-QLRELGTGSFS--EEI--TADDFSRLQSCF---STCRKMTSLSGFWEV-----GQGCLPVIYPVCESLISLDLSYTP-V…
	Polypodium_glycyrrhiza_CJNT2002397 EA-PAFFLEDV----LEQVLQFLTSHRDRNNVSLVCKSWYKVDAQSRRRVFIGNCYSISPERLINRFHKVTSITLKGK-PRFSD---------FDLLPS--NWGAQALPWVEAFCSAYP-DLEELRLKRMTICDTSLQMIAM-HL--IHFKRLTLITCDGFSSDGLAAIAKYCKYLECIDLAENKVD--S--GSWLCQFHEVCRSLVSLNLENIP-G-DL-S-FEALEGLVSR--CAMLESLKLNSSISL-------------TQMQR---------LLY-LAP-QLRELGTGSFS--EEI--TADDFSQLQSCF---STCRKMTSLSGFWEV-----GHGCLPVIYPVCKNLISLDLSYTP-I…
	Woodsia_scopulina_YJJY2016328 DT-ATFFPSDV----LEHVLQFMPSDKDRNNVSLVCKSWYKVEAQTRRRVFIGNCYSISPEKLIRRFHKVTSVTLKGR-PRFSD---------FDLLPS--NWGAHALPWVEACCSAYP-HLEELRLKRMTICDNSLQKIAT-HL--TYFKSLTLIACDGFSSDGLASIAKHCKFLECLDLTENKVE--NLSGSWLSQFHEACSSLVSLNLANVN-G-EL-S-FEALEGLVGR--CTMLESLKLNSSISL-------------TQMQG---------LLY-RAP-QLRELGTGSFS--EEI--TADDFSRLQSCF---SACKKMTSLSGFWEA-----GRGRLPVIYPVCKNLICLDLSYTF-VDDTDF…
	Adiantum_tenerum_BMJR2008896 NL-LALFPDDV----LEHVLKFVTSDKDRNNVSLVCKSWSKVEADSRHQIFIGNCYSISPERLVSRFHNVISVTLKGK-PRFSD---------FDLLPS--DWGAYALPWVEAFCNAYP-HLEELRLKRMTVCDDSLLKIAT-CL--LRFKRLTLITCDGFSSDGLSSIARHCKFLECVDLTENKVE--SLSGSWLNQFSWVCTSLVLLNLGNVH-G-DL-G-FEVLEGLVQR--CTKLESLKLNSSVTL-------------TQLQG---------LLC-HAP-QLRELGTGSFS--EEL--TADDFLRLQSSF---STCRKLTSLSGFWDV-----GLGRLSVIYPVCKNLSCLDLSYTS-VGDADFI…
	Azolla_filiculoides_s0063_g035344 ID-SNILPDDL----LDQVFNLLTSDQDRNNISLVCKSWYKAEAQSRRRVFIGNCYSITPSRLINRFPNLFSATIKGK-PRFAD---------FDLLPM--NWGARAYPWIDAFCKSYP-LLEELKLKRMTVCDASLQRIAT-SF--PHFKRLTLITCDGFGSVGLSFIARNCNVLESLDLIENKVE--NLNGSWILDFPSTFTSLVSLNLENIQ-G-EV-N-TESLAGLIGR--CSNLKSLKLNSSVSL-------------TDMLM---------LLH-RTP-NLIDLGTGSFS--QDI--TPEGLLRLQSCI---TNYTNLTSLSGFWEV-----RPGSLCCVYPVCKNLTSLNLSYTP-VD…
	Salvinia_cucullata_v1_1_s0044_g013019 EG-AGEVLEHV----LEHVFKFLTSDGDRNNASLVCKSWYKIEAQGRRHVFIGNCYSVSPQMLTHRFHGVSSVTLKGK-PRFAD---------FDLVPN--NWGAHTEPWIEALCSAYP-DIEELKLKRMSVSDSALHAIAT-RL--HRFKRLTLITCDGFSSSGLASIAAHCSSLEVLDLTENKVE--NLFGHW????????????????????-?-??-?-??????????--???????????????-------------?????---------???-???-?LVELGTGSFS--QDI--TAEEVQELQNCI---GKCRNLSSMSGFWDV-----KRGSLAIIYPACRNLTSLNLSYT…
	Selaginella_moellendorffii_170974_SmAFB1 GR-LTTFPDEV----LENVLKFVTGHKDRNAVSVVCKAWYKAEGWNREAVFIGNCYAVSPDILTRRFPRLKSMTLKGK-PRFAD---------FSLVPP--NWGAFFHPWMPVIVESYP-WLEALRLKRMTVSDESLFMISQ-LL--PNFRALNLVNCDGFSTEGIAAITSHCRYLQELDLQECLVD--DRGGEWLSYFPESCNTLVTLNFSCLE-S-DV-N-FECLEKLVSR--CRSLKKLNLNKGVTL-------------EQLLR---------LLV-KAP-QLTDLGTGTYS--QMQ--NWSQYVELRTAL---SNCKDLRHLSGFWMV-----EPIFIPLIYPLAQNLLSLNL…
	Selaginella_acanthonota_ZYCD2008394 RE-MDSVPHEV----LEHVFKFINGHKDRNSVSLVCKAWYKAEGWSRRSVFIGNCYSVTPDMVASRFPRILAVTLKGR-PRFAD---------FNLVPR--GWGANVLPWLRVVVDRYP-WLEELRLKRMTVSDESLSIIAR-CL--PNFRALVLTNCDGFSTDGIAEIATHCRNLEELDLQECEVA--DRGGGWLSCFPETCTTLVSLNFSCLQ-S-EV-K-FEALEQLVAR--CKSLKKLKLNRSITL-------------ELLHR---------LIV-KAP-QLTDLGTGTYS--QIQ--NWSQYLELRTAL---SKCKGLRSLSGFWML-----EPVFVPLIYPLCKNLVSLNLSYAT-…
	Selaginella_acanthonota_ZYCD2042543 -----AFPDEV----LEYVLKFVVSRKDRNAVSLVCKAWYRAEASSRESVFVGNCYAVSPATILRRFPRLKSLTLKGK-PRFAD---------FALVPP--GWGAYALPWVATFAQAYP-WLEEIRLKRMCVSDEALAVIAS-SF--PAFRVLVLTSCEGFSTDGLAAIARSCRQLREFNLQECDVE--DRGGHWLSCFPESCTSLVTLNFACLA-S-AV-H-FDSLERLVSR--CTSLRSLRLNRDVTL-------------PQMQR---------LLV-RAP-QLTDLGTGTYC--QQL--KYQQYRDLQSAL---GNCKMLSTLSGFWDV-----SSVLLKSLFIVCPNLTSLNLSYVA-…
	Huperzia_squarrosa_GAON2016718 -----SFPDEA----LEYVLKFISSHKDRNAVSLVCKAWYRAEGWNRQTVFIGNCYAVSPEILINRFPRIKSLTLKGR-PRFAD---------FNLFPQ--DWGAYLNPWVVAMAASYP-WLEELHLKRMTVSDDCLMMLGR-TF--ANFRVLVMINCDGFSTDGLAVIASQCRYLEVLDLQESEIE--NHGGQWLSCFPETCTSLVCLNFACLG-S-VV-N-FDALEKLVAR--CKSLKSLKMNKGVSL-------------EQLQR---------LLV-RAP-QLIDLGTGSYS--QQL--IWAQYSELQTAL---TKCKNLKSLSGFWDV-----APVFVPSLYPIGHNLTSLNLSYAT-IRGNV…
	Selaginella_moellendorffii_168175_SmAFB2 ----YEFPDDI----LEHVLVFLSSHRDRNSVSLVCKSWYKAEAASRANLFIGNCYSVSPELVARRFPKVRSLTLKGK-PRFAD---------FNLLPP--HWGAYLLPWIVTFAHASL-PLEELRLKRMCVSDEALDLLAT-SF--PSFRVIVLNNCDGFSTKGLASIARNCRNLQELNLQESLVE--DHSGDWISAFPDTTTSLLALHFSCLD-A-AV-D-FDALDALVAR--NPQLRSLGLNKKVAL-------------WQLQK---------LLQ-RGP-QLTDLGTGSMS--GIGN-LNGGGADLSACL---ASCTKLQSLSGIWEA-----EPPCLIALYPVCLNLLSLNL…
	Selaginella_acanthonota_ZYCD2009793 --------HEV----LEHVLVFVTSRRDRNAVSCVCKAWYRAEAESRRHVFVGNCYSVAPSVAAARFTRLRCLTLKGK-PRFAD---------FQLLPP--NWGAYLLPWVQELAAAGA-GLEELRLKRMCVCDESLRLLGT-AF--SGFRSIVLTNCDGFSTDGLVAVARHCRHIEELQLQESLIE--DRGGEWLKAFPETCTSLVALNFSCLD-S-AV-D-CDVLEALVRR--CSSLRILGLNKRVPL-------------RHLAR---------LIS-AAP-NLVELGTGSFA--RDQG-MWEQVEQLRSAF---ASLQHLRSLSGVWEA----PEPACLTAIRPVCGELTSLNLSYAT-…
	Huperzia_squarrosa_GAON2000046e EP-RTSFPDEV----LEHVLAFITESKDRNAVSSVCKAWYKTEGWNRQHVFIGNCYAVSPRILIRRFPRMKSLTLKGK-PRFAD---------FNLVPP--DWGAHLLPWITAIAVAYK-DFEELRVKRMTVSDRSLEVLAN-SF--PKFKTLVVTSCDGFSTDGLAAVTSQCSYLEELHLQESEVE--DRGGYWLSSFQESCTSLVTLKFACLD-S-NV-D-FDALEKLVAR--CTSLKNLGLNKKISV-------------EQLHR---------LLV-RAP-QLITLGTGSFN--QIL--RWPQLRELSAAL---GDCKRIQCLSGFWDV-----EPLYISMLYPLCSNLTRLDLSYAT-IRSA…
	Huperzia_squarrosa_GAON2056156e -----TFPEEV----LEHVLMFVLASKDRNAVSQVCKAWYRAEQWSRRHVFIGNCYAVNPDFVIHRFQMVTSLTLKGK-PRFAD---------FGLVPP--NWGASLLPWIAGIAGGYP-GLQELYLKRMSVSDESLALLAD-SF--SSFQVLSLVNCDGFSTDGLAAIARRCRELRKIHLQDCDVE--DRGGHWLSLF????????????????-?-??-?-??????????--????KSLELSENVSL-------------EQLQQ---------LLL-KAP-QLTNLGTGAFD--QEL--QVDQLVHFREAL---VGCKGLQRLSGLWGM-----EPEYISMLFPICKHLTHLNLSYAP-IRSE…
	Huperzia_squarrosa_GAON2003633 EP-SPPFPDEV----LEHVLNFMTAAKDRNSVSQVCKAWYRIEQWSRHHVFIGNCYALSPQFLIMRFPRVKAITLKGK-PRFAD---------FGLVPP--DWGAHLFPWVESLAEGYP-RLEELHLKRMTVSDESLSLLAQ-SF--PDFRVLSLTNCEGLSTDGLAVVISRCKNLVKLHLQDSEVE--DHGGDWLSCFPESCTALECLNFSCVD-S-DI-N-FEALESIVAR--CPGLKSLELNRKISL-------------DQLQR---------LLV-KAP-QLIDLGTGIYD--QDL--RRAQAANLRAAL---LNCKSLRTLSGLWGI-----GPEYIPMLYPVCRNLTSLNLSYAP-MQIFQ…
	Diphasiastrum_digitatum_WAFT2002776 EL-RASFPDEV----LEHVLTFVTEPKDRNAVSLVCKGWYKTEGWSRQHVFIGNCYAVSPQILIRRFPNMKSLTLKGK-PRFAD---------FNLVPP--DWGAHLLPWIRAIAVAYP-GFEELRLKRMTVSDMSLEVLAC-SF--PNFRTLVVTSCDGFSTDGLAAVTSQCSNLEELHLQESEVE--DRGGHWLSSFQECCTSLVTLNFACLD-S-NI-D-FDALEQLVAR--CTSLKSLGLNKKISL-------------EQLQR---------LLV-RAP-QLMSLGTGSFN--QNL--QWSKLGELSAAL---VNCKRLQSLSGFWDV-----EPLYIPMLYPLCSNLTNLNLSYAT-…
	Diphasiastrum_digitatum_WAFT2002775e EL-RTAFPDEA----LEHVLAFVTEPKDRNAVSLVCKAWYKTEGWSRRHVFIGNCYAASPEILIRRFPKMKALTLKGK-PRFAD---------FNLVPP--DWGAHLHPWVTAIAAAYP-GFEELRIKRMTALDESLQLLAH-SF--PNFRSLVMTSCDGFSTDGLAALTSRCSNLEELHLQESEVE--DRGGHWLNSFQECCTSLVTLNFACLD-S-DV-D-FDVLENLVAR--CTSLKNLGLNKKISL-------------EQLQR---------LLV-RAP-QLTSLGTGSFN--QNL--RWSQLGELSAAL---VNCKGLQSLSGFWDV-----EPLYIAMLYPLCSNLTHLDLSYAT…
	Diphasiastrum_digitatum_WAFT2066105e -----SFPDEV----LEYVLKFITTHKDRNAVSLVCKAWYSVEGWNRQSVFIGNCYAVSPEILINRFPRIKTMTLKGR-PRFAD---------FNLFPQ--DWGA??????????ARYP-WLEELRLKRMTVSDECLVMLAH-AF--PNFRVLVLTSCDGFSTDGLAAIAGHCRHLTVLDLQESDIE--NRGGHWLSCFPETCTSLVCLNFACLN-S-VV-D-FDALEKLVER--CTSLKSLKLNKGVSL-------------EQLQR---------LLV-RAP-QLCDLGTGSYS--QQL--KWTQYAELQTAI---TNCKDLRSLSGFWDV-----APVFVPSLYPIGRNLTTLNLSYAT…
	Diphasiastrum_digitatum_WAFT2057170e EV-PVSFPDEV----LEHVLIFVTAPKDRNSVSQVCKAWCRTEQWSRRHVFIGNCYSVTPDFLLRRFPR?KSITLKGK-PRFAD---------FGLVPS--DWGAHLFPWVFAMAEGYP-WLEELHLKRMVVSDESLALLAH-SF--PNFRVLSMI??????THGLAAVTSQCKNLVKLHLQDSEVE--DRGGHWLSCFPESCTALECLNFSCVD-S-EI-N-FDALERLVAR--CPSLKSLVLNRKISL-------------EQLQL---------LLM-KAP-QLTDLGTGAYN--QDL--QRAQMVKLKAAL---VNCKGLQKLSGIWGI-----EPEYIPMLYPVCRNLTSLNLSYAP…
	Diphasiastrum_digitatum_WAFT2010634 ???????????----?????????????????????????????????????????????????????????????????????---------?????????????????????????????????????????????????????????????????????????????????????????DSDVE--DRGGHWLSFFPDSCTTLEALNFSCLD-C-DI-D-FEVLERLVAR--CPSLYNLGLSKNISL-------------TQLQR---------LLV-RAP-QLTDLGTGSFD--EDL--QVDELDYLKKAL---AACKGLQKLSGLWGM-----EPEYTNMLCPICKNLTYLNLSYAP-…
	Megaceros_vincentianus_TCBC2006906e -MPPLFFPDEV----LEHVLVFLTSHKDRNAVSLVCRAWYKAERWSRKEVFIGNCYSISPEIVIRRFPRLKTVTLKGK-PRFAD---------FGLVPN--DWGASIHPWVLDFARAYP-GLEELRFKRMTVTDDSLDLIGR-SF--PNFKVLVLTNCEGFSVRGLSSIARLCRHLTHLDLSENHMNASDVAGG?-?SFPETCISLETLNFAI-N-D-TG-N-YDALRSLVAR--CPSLKSLNVSKGVDM-------------DQFPG---------LLL-TAP-QLVELGTGSHG--GLSS-EIGSIVDLRTAL---RNCTGLRKLSVRWDL-----SPTHFSALHTVCANLVSLDVSFVP-…
	Nothoceros_aenigmaticus_DXOU2003633e -MPPLFFPDEV----LEHVLVFLTSHKDRNAVSLVCRAWYKAERWSRKEVFIGNCYSISPEIVVRRFPRLKTVTLKGK-PRFAD---------FGLVPT--DWGASIHPWVLHFARAYP-GLEEL????????????DLIGR-SF--PNFKVLVLTNCEGFSVRGLSSIARLCRHLTHLDLSENHMIASDVARCWIESFPETCISLETLNFAI-N-D-TG-N-YDALRSLVAR--CPSLKSLNVSKGVDM-------------DQFPG---------LLL-TAP-QLVELGTGSHG--GSSS-EIGSIVDLRTAL---RNCTGLRKLSVRWDL-----SPT?????????????????????…
	Physcomitrella_patens_Pp3c23_5870_PpAFB1_TIRA2 -MPPSVFPDEV----LEHVLVFLDSHRDRNSVSLVCKAWYKAEGWSRRRVFIGNCYAASPAHLIKRFPKLVALEMKGR-PRFTD---------FGLVPQ--NWGAFIQPWIEAMAEYYP-GLEELKLKRMTVSDESLRMVAV-AF--PNFRSLRLTSCDGFSTDGITEITKNCRNLAVLDLQENDID--IRSGDWLKAFPETQTSLEWLNFATVK-C-ME-A-FQCLEALVAR--CPCLKRLKLNKDISL-------------DQLRK---------LLL-RAP-QLEVLGTGIYN--QNL--SWGKLHELQGSL---KRCKNLRSLSGLWEV-----IPMCLPTMYPVCLN…
	Physcomitrella_patens_Pp3c20_17150_PpAFB2_TIRA1 -MPPSVFPDEV----LEHVLVFLDSHKDRNSVSLVCKSWYKAEGWSRRKVFIGNCYAVSSATLIRRFPKLVSLEMKGR-PRFTD---------FGLVPQ--NWGGFIQPWIQVMAEYYP-GLEGLKLKRMTVSDESLRMIAV-AF--PNFRSLRLTSCDGFSTDGITEITKNCRNLAVLDLQENYMD--IRNGDWLKAFPESLTSLESLNFATVK-C-AE-A-FQCLEALVAR--CRCLKTLKVNKDISL-------------GQLRS---------LLL-RAP-QLEELGTGIYN--QNL--SWGKLHELQGSL---KRCKNLRSLSGLWEV-----IPMCLPTMYPVCL…
	Physcomitrella_patens_Pp3c23_11300_PpAFB3_TIRB1 -M-PSLFPDEV----LEHVLVFLTGHKDRNSVSLVCKAWCRAEGWSRRDVFIGNCYASSPTILLRRFPKLTSLAMKGR-PRFTD---------FGLVPS--SWGAFIQPWIEALADHYN-GLECLRLKRMTVSDESLRIVAL-AF--PNFRSLRLSSCDGFTTDGLEWITRHCRHLTELDLQENEIQ--VRGVGWLTAFPETQTSLESLNFANIH-T-PY-D-FHSLYALVTR--CPKLTKLKLNREITL-------------EQMQR---------LLL-QAP-QLEDLGTGAYN--QNL--TWGRLHELQSSF---RRVRNIRTLSGFWDT-----VPMCLPTCFPICK…
	Physcomitrella_patens_Pp3c24_9800_PpAFB4_TIRB2 -M-LSVFPDEV----LEHVLVFLTDHRDRNSVSLVCKAWCRTEGWSRRSVFIGNCYAASPNLLLRRFPKLTSLEMKGR-PRFTD---------FGLVPS--NWGAFIQPWIEALAEHYA-GLECLRLKRMTVSDESLRIIAL-AF--PNFRSLRLASCDGFTTDGLQWITRHCRHLKELDLQENEIQ--VRSVGWLTAFPESQTTLESLSFANIQ-T-PY-D-FHSLYALVAR--CPRLKRLKLNREVTL-------------EQMQK---------LLL-LAP-QLEDLGTGAYN--QKL--TWGKLHDLQASF---RKVKNIRSLSGFWDV-----SPRCLPTCFPICNE…
	Ceratodon_purpureus_CerpuR40isotig08575 -M-PSVFPDEV----LEHVLVFLDSHKDRNSVSLVCKAWYKAEAWSRRKVFIGNCYAVSPAILIRRFPKFTCLEMKGR-PRFTD---------FGLVPS--NWGAFVQPWIEALAKHYT-GLESLRLKRMTVSDECLRLIAA-AF--PNFRSLRLTSCDGFSTDGLAEITRNCRNLTEFDLQENDIY--VRNGEWLTAFPVSQTSLECLNFATIK-S-KT-D-FQHLEALVAR--CRNLKRLKLNREVTL-------------EQLQR---------LLL-RAP-QLVELGTGIYN--QNL--SWGKLQQLQASL---VRCKNLRSLSGLWDV-----VPTCLPTMYPVCLELLSLDLS…
	Ceratodon_purpureus_CerpuR40isotig08655 -MPRSVFPDEV----LEHVLVFLTSHKDRNSVSLVCKAWYKAEGWSRREVFIGNCYAASPSNLIKRFPKLTSLQMKGR-PRFTD---------FGMVPA--NWGAFILPWIEAMADHYP-GLEELRLKRMTVTDKDLRIVTE-AF--PNFRSLRLTSCDGFSTDGIAEIARNCRNLAVLDLHENDMY--VRNGDWLTAFPETHSSLECLNFATVK-Y-KN-D-FRSLEALVAG--SPNLKRLKLNREISL-------------DQLRK---------LLL-RAP-QLEELGTGVYN--QNL--SWNKLHELQSSL---VRQKNLRSLSGFWDV-----AQNCIPTMYPVCLELTSLDFS…
	Pohlia_nutans_GACA01002477 EM-PCVFPDEV----LEHVLVFLDSHKDRNAVSLVCRAWFRAEGWSRRRVFIGNCYALSPEILIRRFPKLTSLEIKGR-PRFTD---------FGLVPS--NWGAFVEPWIQALSLHYG-GLEELRLKRMTVSDESLRLIAD-SF--PNFRALRLTSCDGFTTDGLAQITRKCRNLTGLDLQENDFD--VRNGNWLKAFPETQTSLECLNFATIK-S-KV-E-FQYLEALVAR--CPSLKKLKLNREITL-------------EQLQR---------ILL-RAP-QLVELGTGIYN--QNL--SWGQLQQLQASL---VRCKNLRVLSGLWDV-----VPTCLPTLYPVCLELTTLDLSNIL-ISTVDFSKF…
	Pohlia_nutans_GACA01003999 ----SVFPDEV----LEHVLVFLTSHKDRNAVSLVCRAWYKAEGWSRRRAFIGNCYAVSPSILIKRFPKLTCLDMKGR-PRFTD---------FGMVPS--NWGAAIQPWIHAMALHYP-GLEELRLKRMTVTDEDLRMVAA-AF--ANFRCLRLTSCDGFSTDGITEITRNCRNLAELDLHENEIH--VRNGDWLTAFPETQTSLECLNFSTVK-S-KS-D-FQSLEALVSR--CSNLKRLKLNREITL-------------DQLRQ---------LLL-RAP-QLEELGTGIYN--QNL--SWGRLHELQGSL---VRCKNLRSLSGLWNV-----VPLCIPTMYPVCLELTSLDLSNVL-LSTQDFSKL…
	Polytrichum_commune_SZYG2000956 ----SVFPDEV----LEHVLVFLTSHKDRNSVSLVCKAWYKTEGWSRRKVFIGNCYAASPANLIKRFPKIRSLVMKGR-PRFTD---------FGLVPP--RWGAFIQPWIEAMAVHYP-FLEELCLKRMTVSDESLMMVAK-SF--ANFRSLSLTSCDGFSTDGLAEITKNCKHLAELDLQENMIE--MPGENWLTSFPETMTSLVSLNFATVG-S-RL-N-YGALEGLVAR--CTGLKRLKLSREITL-------------EQLQK---------LLL-RAP-QLEELGTGSYS--QNL--SWAQLSELQSAL---VRCKNLRSLSGIWEV-----VPMCIPTLYPVCLNLTSLNLMDIS-LSTT…
	Sphagnum_fallax_0112s0055 ----ASFPDEV----LEHVLVFLTRHRDRNAVSLVCKAWYKAEGWSRREVFIGNCYSLSPQHLVRRFPKITSVIMKGR-PRFTD---------FGFVPR--NWGAYVYPWIQTMAMHYP-WLEELRLKRMTVCDESLAMIAR-SF--SNFRALSLTSCDGFSTDGLAEITRHCRNLAELELQENDIE--FRSGEWLTGFPETYTSLVSLNFATVR-S-HV-D-FVGLERLVAR--CPLLKKLKLNKEITL-------------DQLQR---------LLQ-LSP-NLVELGTGSYS--QKL--SL-----PQTAL---GNCNSLRSLSVIWEV-----VPVFVHTLYPVCANLTSLNLSDVL-LPTTDFQELI…
	Sphagnum_fallax_0030s0089 ----SSFPDEV----LEHVLVFLTRHEDRNAVSQVCKAWCSTEGASRKKVFIGNCYALSPEDLVRRFRKITTLVMKGR-PRFTD---------FGLVPH--NWGAHMYPWIRTMALHYP-GLEELRLKRMTVSDESLEMIAR-CF--SSFRALSLTSCDGFSTDGLAHITRHCGNLAELELQENEID--FRSGDWLTSFPDTYTSLVSLNFATVR-P-TV-D-VDALERLVAR--CPLLRKLKLNKEITL-------------KQLQR---------LLL-RAP-NLVDLGTGSYS--SNL--SWAQLSELQTTL---ARCKDLRSLSIIWDV-----APMFVRTLYPVCLNLTTLNLSDVH-LPTADFAKLI…
	Sphagnum_fallax_0185s0029 SS-CCSFPDEV----LDDVLVFLTRHEDRNAVSLVCKAWFHTERASRRTVFIGNCYAVSPEQLVARFPKITALLMKGR-PRFTD---------FGLVPH--NWGASIFPWLHVMAKYYP-ALEELRLKRMTVSDESLELIAH-SF--SSFRVLSLTSCDGFSTDGLAHITKHCGNLAELELQENEID--FRSGEWLTSFPETYTSLVSLNFATMR-S-EV-D-VVALERLVAR--CPSLKKLKLNKEISL-------------DQLQR---------LLL-RAP-NLVELGTGSYS--QSL--SWGQLSELQTTL---AKCKDLRSLSVVWEV-----APMFVRTLYPVCLHLTTLNLSDVH-LPTPDFTKLI…
	Sphagnum_fallax_0423s0002 AM-CTSFPDEV----LEHVLVFLTRHQDRNAVSLVCKAWFKAERWSRRKVFIGNCYALSPKHLVHRFPKITSVVMKGR-PRFSD---------FGFVPA--NWGAYIYPWIQTMAEHYP-QLEELRLKRMTVSDESLAMISQ-SF--SRFRALSLTSCDGFSTDGLAHITRNCRNLAELELQENDIE--FRSGAWLTGFPETYTSLVSLNFATVR-S-KV-D-IVALEHLVAR--CPLLKTLKLNKEITL-------------DQLQR---------LLQ-RSP-NLVELGTGSYS--QNL--SWAQLQELQMAL---GKCKNLRSLSGIWEV-----VPLFVRTLYPVCPNLTSLNLSDVF-LPTTDFARLI…
	Sphagnum_fallax_0112s0054 VM-PFTFPDEV----LEHVLVFVTCHRDRNAVSLVCKAWCKTEGWSRRKVFIGNCYALSPEVLVRRFPNITSVIMKGR-PRFAD---------FGFVPA--NWGAYIFPWIQAMATHYP-CLQELRLKRMIVNDASLAKIAQ-SF--SSFRSLSLTSCIGFSTDGLAEITRHCRCLAELELQENDIE--FRSGEWLTAFPETYTSLVSLNFSTVH-H-KV-D-VLALEHLVAR--CPLLKKLKLNKEINL-------------EQLQR---------LLL-RAP-NLVELGTGSYS--QSL--TWAELSELQSAL---DKCKSLRSLSGIWEV-----VPEFVQTLYPVCPNLITLNLSDVL-LPTADFSKLI…
	Takakia_lepidozioides_SKQD2000878 EM-PSSFPDEV----LEHVLVFLTSHTDRNAVSLVCRAWCRTEAWSRKRVFIGNCYATSPEHLIGRFPKMKALVMKGR-PRFTD---------FGLVPM--NWGAFVFPWIVAMARASL-GLEELCLKRMTVSDESLSILVR-SF--PNFRVLSLTSCDGFSTDGLAEVTRNCRNLAELELVENDIE--IRGGEWLSSFPETYTSLVSLNFATVR-S-IV-D-FNALENLVAR--CPSLTRLKLNKEINL-------------EQLQR---------LLQ-RAP-QLTELGTGSYS--QNL--SWAQLSELQSAL---VRCKNIRSISGIWEV-----VPTCIPTLWPVCLNLTSLNLSDVL-VP…
	Marchantia_polymorpha_Mapoly0035s0062_MpTIR1 ----SPFPDEV----LEHVLVFLQSHKDRNSVSLVCKAWFKAEKWSRHRVFVGNCYAVSPQMVINRFSKLNSLHIKGR-PRFAD---------FGLVPH--HWGAYISPWVTALAQSCP-WFEELRLKRMTVSDDSLLMIAQ-SF--PNFKSLILTSCDGLSTDGLAYITSSCRHLERLDLEENEIE--PRGGEWLSCFPDNHTSLVSLNFATVD-S-AI-D-FDALEALVER--SKNLRSLKVHREVNL-------------EQLNR---------LLA-RAP-NLVELGSGSYT--QLL--KWGQYSELSSAL---GRCKQLRSLSGFWEV-----EPVYLPSLFAVCANLT…
	Porella_navicularis_KRUQ2114273 ----SPFPDEV----LEHVLVFLKSHKDRNSVSLVCRAWFKAEKWSRQRVFVGNCYAVSPRQVISRFPKMNSLTIKGR-PRFDD---------FGLVPE--DWGGYIDPWIQALAQTCP-WMEELRCKRMTISDASLRLLGQ-SF--PNFRSLVLTSCDGFSTDGLALITSSCRHLAQLDLLENRIE--DKGGHWLSCFPETHTSLVSLNFATVD-G-TI-D-FEDLERLVDR--SKGLKSLKVHKDVSL-------------EQLQR---------LLV-RAP-QLTELGTGKYS--QNL--KWGQYSELQMAF---NECKGLRSMSGFWEV-----APIYVPSLYSVCLNLTSLNLSDVM-LHTT…
	Selaginella_moellendorffii_104859_SmXFB1 RG-LLCCIDDV----LEKIFGYIKKPVERNAISAVCKRFHELEARTRHHVLVYNMYAVNPMKLFERFPSVRSITIKGN-PRLVD---------FDILPR--DWAGHAGPWIAAI-KAHP-QLNRFRIKRMTITDSQIEELCAACG--PNLKIMQFDKCSGFSTQGLQALAKFCKNLTHLGLAQSMID--STSTKWLKDLVNSCPALEYLDLSLIEMG-DV-D-EAVLVKLAER--CKLLKLWESETQNSE-------------RFLP----------VLQKCSS-NLSDLGIERIN--SNS---------ETSLL---AKCTALEGLSGIFDL-----VDDGMHAFMSVSSRLTRLDL…
	Selaginella_acanthonota_ZYCD2003560 SI-IDACDDDV----LSKAFSSIRRPADRNAISAVCKRFHELEAKTRGHVLVYNMYTACPTDLFQRFPSVTSITLKGN-PRLVD---------FKLLPR--EWAGDAGSWIDAI-KANP-QLNRFRIKRMKITDSQIEELCAACE--RKLQVLIFDKCTGFSSKGLESIAKYCKNLKELGLAQCIFD---DS-GWLRDLAESCLSLEKLDLSLIELG-DV-E-DEVVVKLARR--CRELRLWETH---NP-------------EHIRL---------VLQNCTP-NLLDLGILRIS--I-----------GQTGT---EKCTGLEALSGIFDL-----VEGGMESFLRVSSRLKKLDLSYST-…
	Physcomitrella_patens_Pp3c22_6020_PpXFB1_TLP1A FP-LLQFPDEI----IEKVIGFLTNPVDRNSTSLVCTRLKAIEGESRETVLISNCYAIQPGTLKSRFPNAKSITIKGK-PRIVD---------FSLIPHAEVWGAYATPWVDLLKEHYR-PIRHLKMKRMTISDSDIKRFVSACG--YSLERLEFEKCSGFSTTGLQYIAGACRNLVVLNLSEADIL--QGDPYWMTSLVNTASSLRVLDLYLTEVE-DV-E-QSVLERLAKQ--CHTLRLC---DALKI-------------NHVLP---------VVTAACE-TVRHLGIGLSF--QNG----DSPNQIAEAL---GRCKELEGISAVWDP-----DEVSAMMLMPVAAR…
	Physcomitrella_patens_Pp3c18_16630_PpXFB2_TLP1B CS-LLQCPDEI----LEKIVDLISDTADRSAISLVCKSLKVLEGHTRGVVLVSNCYAIQPLTLKDRFPNAWSITIKGK-PRIVD---------FALIPHAEVWGAYATPWMEILVNFDR-PIRHLRMKRMTVSDSDIQLLVSRCG--EGLQRLELEKCSGFSTFGLEIIARACRNLIELNISESEIQ--NGGRSWLTTLVNTAKSLQVLDLSLTDVE-HV-E-QSVLEKLAGQ--CHTLKLS---AALEI-------------ERVLP---------VVEAANH-SMRHLGTRFYS--QNI----ENPHQIAEAF---GRCRVLEGISAPLDL-----DEGSMMMVMPIAG…
	Ceratodon_purpureus_R40isotig09515 SS-LLQFPDEI----LQNIIDSLPNPVDRNAVSLVCKRFNAIEGSSREAVLISNCYAIPPSKLVSRFPNARSITIKGK-PRIVD---------FSLIPHADVWGAYATPWVEVLTQFFR-PLRHLRLKRMTITDYDIELLMRGCG--ESLQRLELEKCSGFSTRGLEMIARTCRNLKELNLSEADIR--NEGPYWLTTLADTAKSLQVLDLSLTEVE-DV-Q-QHVLEELARR--CHTLRLC---EALKI-------------DHVLP---------IVKAADT-TVRRFGIGLYS--QNV----ENPDDIAEAF---RNCKGLQGISALWDL-----DEGSVMMVMPVAARLTTLDLTYAL-L…
	Ceratodon_purpureus_R40isotig09604 CS-LLQFPDEI----LKRIVDWLCNPVDRNALSLACKRLKAIEGQSRETVLVSNCYAIQPTTLVRRFPNARSITIKGK-PRMVD---------FSFFPHAEVWGAFATPWVEILVKHYR-PIRHLKMKRMTISDSDIERLVSVCG--DSLQELELEKCSGFSTAGLDVIARACQNLVVLNLSEAEIK--NEGPTWLTTLAETAKSLRVLDLSLTEVH-HV-E-QNAVVELASR--CHTLRLC---DAMKI-------------DHVLP---------VVEAARE-TVRHMGIGLYS--QNV----ENLDQITEAF---GRCKGLEGLSALWDL-----DERSLLMIMPVAARLKSLDLTFTL-L…
	Pohlia_nutans_GACA01031966 CS-LLQFPDEI----LKRIIDWLSHPKDRNAVSRVCKRLHAIEGPSRETVFISNCYAIQPMTLVSRFPNARSITIKGK-PRMVD---------YSFIPHADVWGAFATPWVDLLCKFYR-PIRHLKMKRMRITDADIERLISVCG--ETLERVELPKCSGFSTTGLEAIARGCRNLVVMNLCEADVK--NEGPLWLTTLANTAMSLQVLDVSLTELQ-NV-E-QNAVVELASR--CHTLRLC---EALKI-------------DFLLP---------VLEAAHK-TVRHLGIGLYS--QNA---AENVDKVAEAF---GKCKALECLRPVWDL-----DERSLSIVMPIAPRIRNLDLTYCV-LGQEQLADL…
	Pohlia_nutans_GACA01030051 SA-LLQFPDEI----LENVIDLLPNASDRNAFSLVCKRFHAIDGQSRESVLVSNCYAIQPWKLASRFPNAKSITIKGK-PRIVD---------FSLIPRAEVWGAYASPWVDVLSKCYR-PIRHLKMKRMMVSDSDIERLVVACG--ASLQRLELEKCSGFSTRGLEIIARACRNLVVLNLSEADIR--NEYRYWLTTLARTARSLEVLNLSLTDVD-FV-Q-QHVLVELATR--CRDLRLC---EALKI-------------DHVLA---------LVKAAAT-SMHHFGIGLYS--QNV----ENPDQIAEAF---HTCQGLQGLSALWDL-----DDGSMMMVMPIAARLTSLDLTYAQ-LLQPELSDL…
	Pohlia_nutans_GACA01043004 SA-FLQFPDEI----LEKVIESLPSSVDRNAVSLVCKRLNAIEGASRQAVLISNCYAIQPGTLVSRFPNAKSITIKGK-PRIVD---------FSLIPHADVWGAYAAPWVEILTKSYR-NLRHLRLKRMTVSDADIEKLVSICG--ESLQRLELEKCSGFSTRGLEFIARVCKNLVVLNLSECDIF--NCGPYWLTTLVNTAKSLQVLDLSLTEIE-DV-E-QTVLETLATR--CHTLRLC---EALKI-------------DHVLP---------IVKAARN-NVRHLGIGLYS--ETY---QENPEEIAEAF---RNCQGLEGISALWDL-----DEGSVMMVMPMAARLTSLDLTYAL-LGQAELMNL…
	Sphagnum_fallax_0005s0348 ST-FLACPVEI----WEKVFSFVWVPADRNAISQVCKQFYKSEARTREKVMVSSCYAIKPDDVAKRFPKARSFSVKGK-PRVVD---------FSLIPHAKKWGAYATPWVALFAQHYP-FLYHLRLKRMSISDSDIKTLVQGCG--ASLQILEFEKCCGFSTIGLQSIAETCRNLRALSFAESEVKHRESSTHWLSMLAERAGSLQFLDMTLVEIQ-DL-D-TGVLLKLAAR--CHTLRIS---ESMNI-------------DQILP---------FLKACTS-SVRSLGMGLHS--HNV----EHRKRIAAAM---SNCKDLTEMSGLWDL-----DEDSVMMLMPIAPRLTRLDLTYAL-LGESQLSDLI…
	Sphagnum_fallax_0010s0248 VS-MLACPEEI----WEKVFSFIERPADRSSISQVCTQFYSCEARTREKVRISSCYAIDPEVVAKRFPSATAFSIKGK-PRIVD---------FSVIPDANKWGAYATPWVTFFAQHYP-FLSQLKLKRMSISNDDIQILVQGCG--ESLQVLEFEKCSGFSTIGLQSIAAACRNLRILSFSESEVQQE-RSANWLSTLADTAKSLKVLDMPLVEMG-DV-D-MRVLLNLASR--CHTLRIC---ESLQI-------------DQIVH---------FLKACTS-TVCSLGIGLHS--HNM----DTRERMAAAI---KGCKGLTEISGLWDL-----DEDSAMILMPIAPCLTRLDLTYAS-LGAAQLSALI…
	Sphagnum_fallax_0092s0048 GN-ILACPEEI----WEIIFCFVERAADRNAISQVCKQFYTLEARTREKVLISSCYAVKPTSVANRFPNAIAFSVKGK-PRVVD---------FSLIPDAQKWGAYATPWVDLFAQHYP-SLSQLRLKRMSVSDADIQTLAQGCG--KSLQILELEKCSGFSTMGLRSIAQACRKLRVLSFAESEVQQQEGVSHWLSILAETARSLQVLDMPLVEID-DE-D-MRVLFNLAAR--CHTLRIC---ESMKI-------------DQTLP---------FLKASTT-NVRSLGIGLHS--SNV----QTREGIASAI---SSCKGLTELSGLWDL-----DEDSMMMLMPIAPRLTKLDLTYAS-LGETQLSTLI…
	Takakia_lepidozioides_SKQD2008822 SN-LLAFPDEI----LEKVIELVDRPEDRNVISLVCKRLNYLEGNTRHTVLVSNCYGIRPLTLASRFPNARSITIKGK-PRIVD---------FSLIPHSELWGAYATPWVEILTRNYK-TLTHLRLKRMFITDTDIALLVSVCG--ESLRSLELEKCIGFSTAGLLSIARTCRNLIFLNLAEAVVH--SYGIQWLTTLAETAKSLQVLDMSLTELA-DV-D-MNSLANLATR--CHTLRLT---ESLQV-------------DRVLP---------ILQAAAN-TVCHLGIGLYS--QMD----ENPDQVAEAF---GRCKGLRDISGLWDF-----DEGSVRVLMPIASRLTRLDLTYAL-LG…
	Arabidopsis_thaliana_COI1_At2g39940 LS-CVATVDDV----IEQVMTYITDPKDRDSASLVCRRWFKIDSETREHVTMALCYTATPDRLSRRFPNLRSLKLKGK-PRAAM---------FNLIPE--NWGGYVTPWVTEISNNLR-QLKSVHFRRMIVSDLDLDRLAK-AR-ADDLETLKLDKCSGFTTDGLLSIVTHCRKIKTLLMEESSFS--EKDGKWLHELAQHNTSLEVLNFYMTEFA-KI-S-PKDLETIARN--CRSLVSVKVGD-FEI-------------LELVG---------FFK-AAA-NLEEFCGGSLN--EDIG-MPEKYMNLVFPR---KLCR-----LGLSYM-----GPNEMPILFPFAAQIRKLDLLYAL-…
	Pinus_taeda_PITA_08921_COI1A ---YGCISDEA----LECVMGHLEDPRDRGSVSLVCKKWYDVDAFTRKHVTVAFCYSIHASDLTRRFTRLESLTVKGK-PRAAM---------YNLLPH--DWGGYAKPWIDQISFTCL-RLKALHLRRMIVTDDDLTTLVR-GR-GHMLQELKLEKCSGFSTRGLEEVAHGCRSLKILMLDESQIE--EESGDWLHELALNNSSLEVLNFYMTTLE-MI-N-TSDLELIVTN--CPSLTSLKVGE-CDI-------------VEMRG---------VLS-KAT-ALEEFGGGTFN--NSEE--HA---TETSMI---TFPPKLTSLLGLNFM-----IEAEMPAIFPRASALKRLDLQYTF-LSTENHC…
	Pinus_taeda_COI1B SV-GYAIPDEV----LKCVMGYLEEPCDRSAVSLVCKRWNRVDALTRKHVTIAFCYTISPSDLGARFPELESLKLKGK-PRASM---------FNLIPQ--DWGGYAEPWINEISQTLL-CLKALHLRRMIVTDEDLRALAR-AR-GHILQVLKLEKCSGFSTLGLLEVARSCRSLRVLFLEESTIE--DEGGEWLHELALHNSSLEVLNFYMTGLE-NV-N-GNDLEMIATN--CRSLTSLKISE-CDI-------------LDLRN---------VFK-KAT-ALEEFGGGSFS--SNEE--QAVEPNIYEMV---KFPTNLMSLSGLNYM-----SETELPVVFPRASSLKKLDLQYTL-LSTENYCQLLQSCINI--…
	Pinus_taeda_COI1C ???????????----?????????????????????????????????????????????????????????????????????---------?????????????????????????????????????????????????????????????????????????????????SLKVLFLEESLIK--DEGGEWLHELALRNSSLEVLNFYLTCLE-SI-S-TRDLMLIATN--CPSLTSLRVNE-CDI-------------LDLRG---------VLE-KAT-ELEEFGGGEFD--NIDG--HA-LATEYRSV---KFPPKVISLVGLNYM-----SDTGLPLLLPRACNLKKLDLQFTF-LSAENHCELLHLCTNL--…
	Salvinia_cucullata_v1_1_s0008_g004038 SR-FESIPEAV----LEHIFSYIDDARDRSSISLVCKEWKKIDTRTRKCVTISMCYTVKPSCLTRRFHALESVKIKGK-PRAAM---------FRLVPD--NWGGHATPWISEISHHCR-LLKSVHLRRMVVSNVDLSTLAT-HR-GDTLQVLKLERCTGFSTRGLHAITRSCRSLKVLFLEESVVA--DDGDAWLHELSVQNSSLEVLNVTATDLK-SI-T-VAALSAIAAN--CKSLTSLQLSD-HQL-------------EELGE---------VLS-KTT-SLKELGGVSLG--DA---SGDATLSLPASI---TSLVRLYY-FGANEG-----DEIVNALIKPIAPGLKKIDLQCA…
	Salvinia_cucullata_v1_1_s0096_g019379 CY-YYSIPETA----LEFVFGYLYRAEDRGSASLACKAWYNVDGRTRREVTIACCYAIDPCRLIARFNALESVKLKGK-PRASM---------FKLIPE--DWGGYAKPWISVIAYQCP-CLKSIHLRRMIVRDDDLFAIAT-QR-GHMLQDLKLDKCSGFSTTGLEAITRACRSLRVLFLDESTID--DKDGKWLHELAVHNTCLELLNFFGTDLQ-NF-S-IEDLLTITVN--CKSLTSLKLNE-LTL-------------ESLMV---------ILR-RTT-SLTELGGLCLG--SN---ELNTVVRLPSSL---TSVVGLYY-AGADDG-----DVAVNQVIQPIASRLKKIDLQAA…
	Salvinia_cucullata_v1_1_s0102_g019858 PR-FDSVPETV----LEHIFGFLEEARDRSAISLVSKEWYSVDRRTRKAVTIAVCYSIKPSNLTERFSALESVKIKGK-PRAAM---------FELVPD--DWGGFAEPWISEISMHCR-FLKSVHLRRMLVTDGDLFTLAQ-HR-GNMLKVLKLERCSGFSTQGLESIARSCWTATLVVIMMDG?????????????????????YVLNITGTDLA-SV-N-LDYLCVIATN--CKSLVSLKLNE-TKL-------------EQLNE---------ILR-KTR-ALKELGGVVVG--DFHPGQPREIVSLPNTI---TSLVNLYN-YGANEG-----DNVVNSVIHPIAPGLKKIDLQYA…
	Salvinia_cucullata_v1_1_s0016_g006874 EG-NDGIPETA----LEIVMGYLENAEDRSSASRVSKKWYRADGRTRREVTIALCYAIDPLCLPRRFRVLESVKIKGK-PRCSM---------FQLIPD--DWGGYASPWISVISTNCA-CLKSIHLRRMIVSDNDLCTLAA-HR-GHMLQVLKLDKCSGFSTIGLEAITKSCKSLKVLFLDESIIE--DHEGTWLHELAVNNSCLEVLNFYGTDLK-KI-N-VEDLLTISVN--CKSLSSLKLNE-LKI-------------ESLAL---------LFS-KTK-CLKELGGLCLG--SN---DLSAAIRLPSTL---TSLVGLYY-EGADEG-----DVLVNKVIQPIASGLKKIDLQLM…
	Azolla_filiculoides_s0015_g013877 HR-FSLIPEAV----LEHIFSYIEDACDRSSVSLVCREWYSIDTRTRKGVTIASCYSIKPCSLTRRFKALEGVKIKGK-PRATM---------FKLVPD--VWGGKAKPWISEISLHCH-FLKFVHLRRMDVTDDDLYMLAK-ER-GHLLQVLKLEKCNGFSTLGLEAIAKSCRSLKVLFLEESYIV--DAGDAWLHELSLHNSSLEVLNITGTDLK-NI-N-IADLSVLATN--CKSLISLKLNE-LEI-------------EELSE---------VLN-RTM-ALKELGGVSVG--DSSPAQPRAPVSLPATV---TSLVGLYY-FGANEG-----DEIVNSLVQPIAPGLRKIDLQYAC-LS…
	Azolla_filiculoides_s0290_g063306 SQ-IRCLPEAV----LGHIFGFIEEACDRSSISLVCKEWYSVDRKTRKSVTIASCYSIKPSRLTRRFESLAAVKIKGK-PRATM---------FRLCPD--DWGGHAEPWISEISRHCS-SIVSVHLRRMIVTDKDLASLSA-RP-GNLLQVLKLEKCSGFSTRGLEAIARSCGSLKVLFLEESVIQ--NEGNAWLRELSLHNTSLEVLNITGTGLE-NV-D-IANLSKIATN--CKSLISLKLNE-LEV-------------EELSE---------VLN-KTT-TLKELGGICVG--NFNPAQPLTSFKLPAGI---TSLVGLYY-FGVNEG-----DEYVNSLIRPIAPGLRKLDLQYSC-LS…
	Azolla_filiculoides_s0568_g077530 RG-GEAIPDTA----LEFIFNYLDNPMDRSAASRVCKKWYNVDGRTRKDITIVLCYSIDPPTLAHRFSALEALKLKGK-PRASM---------FKLVPE--DWGGYAKAWVPVLTVHCP-CLKSIHFRRMVVDDDDLVNIAQ-GR-ANMLQVLKLDKCSGFSTNGLETVTRSCKSLRVLLLDDSIIQ--DHGGTWLHELAIHNKCLEVLSFYGTDLQ-NI-D-TEDLLTIATN--CKGLISLKLSE-FKL-------------ESLMP---------FLS-KST-CLRELGGLCLG--SN---GVNIDIRLPSTL---TSLVGLYY-AGADEG-----DAVINQVIRPIASGLKKLDLQFAF-LS…
	Azolla_filiculoides_s3188_g114985 RG-GEAIPDTA----LEFIFNYLDNPMDRSAASRVCKKWYNVDGRTRKDITIVLCYSIDPPTLAHRFSALEALKLKGK-PRASM---------FKLVPE--DWGGYAKAWVPVLTVHCP-CLKSIHFRRMVVDDDDLVNIAQ-GR-ANMLQVLKLDKCSGFSTNGLETVTRSCKSLRVLLLDDSIIQ--DHGGTWLHELAIHNKCLEVLSFYGTDLQ-NI-D-TEDLLTIATN--CKGLISLKLSE-FKL-------------ESLMP---------FLS-KST-CLRELGGLCLG--SN---GVNIDIRLPSTL---TSLVGLYY-AGADEG-----DAVINQVIRPIASGLKKLDLQFAF-L-…
	Selaginella_moellendorffii_163526 CE-HPLLLESV----LSIIFGMVDSPAERRAMSEVCRQWHAMDRETRKHVYVAFVYSVSPATLTRRFPNLRSLKLKAK-PRAYE---------FDLLPH--NWGGHVHPWLENIGPAYP-QLSALHLRRMEVRDQDLSAVAT-AY-AASLETLKLDFCSGFSTTGLRAITGSCKCLKVLYVENSYVS--DEGGQWLNELALHNRVLEVLDFQLAIGS-KV-N-VEDVRTIIEK--CPNLTSLKLVEGEDG-------------DGLRK---------ALA-SST-SLRELGIFLTA--QEE--DDQEEIDQGTSS---TGPRNLTSISGD----------IPLPLYTSVAAQLLKLDLMTTTSIE…
	Selaginella_moellendorffii_75487 -----WMSDEL----LDSIFSFIDHPMDRRALSEVCKRWYLADARTRKSITVGFSYAIEPSNLSRRFRNIQALKIKGK-PRVSE---------FGMVVK--DWGAYCEPWIQELVTAFA-SLTSLHFRRMEVSDTALRLLAR-GF-GSSLQVLRLDKCSGFSTAGLEAVARECKSLRVLYLEESVIE--DDGSQWLHELAVSNSALEVLNFFLTGLD-LS-N-LSDLAHIIAN--CKSLTSLKLGE-ISV-------------VDLAD---------IFI-AAK-SLKELAVIF-A--RNNI-----------SV---NLPKTLTSFAGD----------LLFPLDPLVCSNFRELDLMSTT-LTA…
	Selaginella_moellendorffii_11318 ST-VLWLCDEL----LERILALIADPCDRAAVSEVNRQWYRVEARTRSRLVVKCSYAVHPWRLAQRFTGLASVTIKGR-PRIYD---------WGLLGD--DWGGAADTWIRVLVACCP-SLAAIHLRRFDVPDSAIAAIAT-AF-ASSLQVLKLDRCSGFSTRGLLEIARHCKNLRVLSLDESIVD--GGGEQWLRALADTATKLEVLSFSLTG-I-EVRG-LDDVAAIVSR--NKRLASLRLDEVRTTAI-----------SRARG---------ILR-DAA-SLQEMLLLYRS--VDE--SS-----IIEKL---ELPKTVTSLAGD----------ISIPLDCGLASRLLKLDLMLTT-LDS…
	Selaginella_moellendorffii_84100 SI-NSRLPDDL----LKIIFSRLGDDQDHASVARVCRQWRDAESATREKITVNFSYAVSPGYVIDRFGQLRALKIKGK-PRASD---------FGLIPV--DWGGYGGPWIAALALAFG-ALASLHFKRMEISDEDLALLAE-TF-RDALQVLKLEKCSGFTSLGLESIARSCRDLRVLSLDESDIE--DKGSQWLRELIHSCASLEALNLSMTG-L-ELRD-IRLVEEIV-S--SSKLKSLKLNDLEDP-------------SRNRR---------LDL-RQS-SLQELGFCGLI-----------------QV---SLPSSLSSFSGD----------LQLAMEPNLASALTSLDLLYTT-ANH…
	Selaginella_acanthonota_ZYCD2009664 SQ-NPLLLEGI----LHKVFTFIDSPADRRAISSVCRTWRAADRDTRTNVYVAFTYSVSPDLLTRRFSSLQSLKLKGK-PRAYE---------FNLLPE--NWGGSVEPWVKAIVTAYP-SLSSLHLRRMEVTDADLINLAQ-GF-KDKLEVLKLDFCSGFSTFGLLSIARHCRMLKELYLENSNIR--DEGLQWLRELALNNKHLEALDFQVADLN-HL-T-ADYLKLIIGN--CANLRSLKFS-TVDG-------------DGLRE---------VLS-KST-SLRQLGTFLNA--PED--DE-------SGF---ELPKNLVSVSGD----------IPSHLLSTVGNGLLSLDLMTATS…
	Selaginella_acanthonota_ZYCD2009744 QC-SSWIPDEL----LEKIFSKVENREIRNSLSQVCKQWYAMDSLTRRKLVVCFSYAVAPQVVTDRFRNLDSLKIKGE-PRVSE---------FGMLGS--QWGGYAGPWIDELVKAFT-HLSSLHLLRMKVFDTDLLNLAR-GL-NSSLQVLKLRKCRDFSTAGLLFIARSCRSLRVFDLDESLVD--EEAEDWLHELALHNTQLEVLSFHLTGIR-VR-N-PSNIVTILSR--CKSLWCLKLSE-IDS-------------TNIRE---------SLS-ASN-SLKELSIFY-D--QDSV--DH-------EL---ELPTTITSFAGD----------LQLPISEPLGCNLVELDLMSAA-…
	Huperzia_squarrosa_GAON_2009932 AS-AAAVPNIV----LECVFNFLQDPKDREAVSRVCTQWHWIDSITRKHVEIPFCYSVSPSALTRRG?--DSLKIKGK-PRAYE---------FDLLPE--DWGGYAQPWVNEIVQAYP-AISRLHFKRMEVMDEDLEAIAR-NF-RKSLQVLKLDKCIGFSTLGLLEIARFCRHIKVIYLEESPIY--DKGGEWLHELAQHHSQLEVLNFSMTSLE-II-D-IHDLEVLVSN--CKRLSCLKVGE-IDA-------------NGIGR---------VLS-RAT-DLKEFAMSNSN--PGDI-TYNNLGGIASKF---DLPKNLNSLSGD----------IILPMNSIVASNIRKLDLKPTS-LSAE…
	Megaceros_vincentianus_TCBC2020867 ---PFVPGQEV----MQAILERVD-TQGRHALSTVSKAWLHVDGFTRSSVRIFNCYGASPSRLTRRFRNLRRIKIKGR-PRADD---------FGLIAP--DWGGFAEPWIREIVGAYP-NLRSLHLKRMVVSDDDLRALAQ--I--PGLEDLTLENCQSFSTAGLRFVA-HCRSLRVLSLRGSCVR--AAGRQWLNDLASNNKVLEVLELDYLE-A-TV-D-VNDVNDLQTL--AGSLKTLRVPFGFRL-------------GELES---------VL-NRTT-ALAKLGAGSLG--DEE--DD-------RII---HLPDSIVSLSGLENL-----PDKYVPQLESVAPRLVDLDLKVAD-L…
	Nothoceros_aenigmaticus_DXOU2037633 ???????????----?????????????????????????????????????????????????????????????????????---------???????????????????????????????????????????????????????????????????????????????????????????????????????????????????????DAE----V-D-VNDVNDLQTL--AGSLKTLRVPFGFRL-------------GELES---------VL-NRTT-ALAKLGAGSLG--DEE--DD-------RII---RLPDSIVSLSGLENF-----PDKYVPHLESVAPRLLDLDLKVAD-…
	Megaceros_vincentianus_TCBC2008377 AM-SGVFRDPV----MKLILEKLEPVASRRAASEVCADWCAVDGRFRREVTIANCYSSYPDRLTKRFPNLKDIKLKCR-PRAFE---------FQQLVP--DWGGCAKEWIEAIAGQYK-ELESLHLKRAVVTDQDLELLAD-GC-GATLRKLVLNKCDGFSAEGLLRVASGCRSLRIFSMLGSHVA--ELRGDWLRVLARNNPHLTVLEL?????????????????????????????????????????????????????????????????????????????????????????????????????????????????????????????????????????????????????????…
	Physcomitrella_patens_Pp3c17_7680_PpCOI1_TLP2A GS-GIPLSDET----LACVLKYVENWQDRAAVSLVCQQWRRVDGATRKFVTISYMYSTNPELLTRRFKRLEGVKIKGK-PRAEE---------YGLLVP--NWGGYAEPWIRELGRVYR-GLQTLLLRRCQVSDSDLELIAS-SPFHSVLQVLHLHKCAGFSTSGLLPVAKACRSLRTLSIEDSNVN--DEGGEWLHVLARHNTVLEVLNFAVLGLE-DV-D-VADLALLLEK--CKSLVSLKVGE-IEL-------------VDMVG---------ALG-KSS-SLLELGAGSCN--YLN--DE--DSRVYASI---SLPLQLTSLSGLWSM-----GDFGLCMILPIAPN…
	Physcomitrella_patens_Pp3c15_1200_PpCOI2_TLP2B GS-GTGLSDET----LACVLKYVESAEDRASVSLVCKQWRLVDGATRKFVTIAYMYSTSPEMLTRRFKRLEGLKLKGK-PRAAE---------YDLLVP--DWGGYAEPWIRDLGRAYT-SLQTLQLRRCQVSNADLTLIAS-SPCQASLQVLYLHKCAGFSTAGLLPVAKSCRSLKSLSVEDSDVT--DEGGEWLFELARNNSVLEVLNFAVLGLE-DV-D-AADLVLLVER--CKSLVSLKVGE-VEM-------------VDMIS---------AIS-RAS-SLTEFGTGSCN--FFG--DE--DSRTHVSI---SLPSSLTGLSGLWAM-----SDPGLAMVLPIAPN…
	Physcomitrella_patens_Pp3c9_10120_PpCOI4 SL-PCGMSDET----LACVLNHIESPQDRAAVSMVCQQWRRVDGMTRKFVTIANMYATSPASLTRRFKGLEGIKLKGK-PRAAE---------YNLVRS--DWGGYGEPWLKVLGRQYA-DLHILQLRRLTVLDSDLELIAS-STFSSALHVLHLHKCVGFTTKGLLPVVRACRSLRRLSLEDSEVE--DKGGEWLHALALNDSTLEELHFGVLGIE-AI-D-IEDLTILVEK--SKSLVCLKVAE-IEL-------------LDMID---------VLQ-RVP-SLEDLGAGSCN--YLG--AK--DVDDFVSI---PWPKKLNALSGMWSL-----MDSGLPQILPIAPNLIKLDL…
	Ceratodon_purpureus_R40isotig09339 VG-EAVIADEA----LACVLKHIDAPQDRAAVSLVCQQWRRVDGMTRKAVTIANMYSTSPAALTRRFTRLRGLKLKAK-PRASE---------YGLVVS--NWGGYTEPWLRELGGQYE-NLQSLVLRRVIVRDSDLLLIAS-SAYCSALEVLQLHKCQGFTTKGLVPVTRSCRALKKLSLEDSDVE--DLGGEWLHALARYNSTLEELHFGVLGIG-DI-D-IADLFTLAEK--CKSLVSLKVGE-IEM-------------LDMVD---------VLS-RTP-YLEELGTGSFN--YLG--DE--DDDAAAPI---PLPKHLKSLSGMWSL-----MDVGLPTILPVAANLRKLDLKYTL-L…
	Sphagnum_fallax_0011s0041 HR-LAVLSDEN----LSRIFEFVDNPQDRAAMSLVCRQWRRVDGMTRKDVTIANMYAIAPAALSRRFKRLECIMLKGK-PRAAE---------YDLLLQ--DWGGYAEPWLKEFASAYA-CLKNLHLRRAEVRDADLHLLAS-APFHASLQVLHLHKCSGFTTRGLLPISRSCRSLKVLSLEESTVI--DEGGDWLHDLARNNSTLEVLDFAVLGLE-TV-S-IDDLALLVER--CKSLVSLKVGE-IDM-------------SDLTQ---------VLN-KAP-FLKELGTGSCS--DLG--EE--KNCMPVSI---NLSQHLTSLSGLWAM-----PDSGLQILQPVAANLKKLDLKFTL-LSGRGYCELL…
	Sphagnum_fallax_0013s0244 RV-SAALSDEN----LSRILELIESPQDRAAVSLVCRQWRRVDGNTRKNITIANMYAVAPTALTSRFKQLECINLKGK-PRAAE---------YDLLVH--DWGGYAEPWLKELTRAYE-RLKTLQLRRLEVRDADLELLAS-APFNTSLQVLHLHKCSGFTTGGLIPLCRSCRSLKVLSLEESDVI--DEGGEWLHALAQHNSVIESLDFAVLGLD-SV-S-VEDLALLAGR--CKSLVSLKVSD-IDM-------------SELNG---------VWS-KVP-FLKELGTGSCN--DLG--DE--KKGMAVSI---NLPQHLTSLSGLWAM-----LDVGLQMVQPVAANLKKLDLKFTL-LSRRGHCELL…
	Sphagnum_fallax_0014s0245 EQ-QRALSDEN----LSRIFLLIESPQDRAAVSLVCRQWRKVDGNTRKYVTIANMYAVAPAALTKRFKSLDGIKLKGK-PRAAE---------YNLLLP--DWGGHAGPWLEEFGAAYD-RLRTLQLRRVEVRDADLHLLSL-APFSATLQVMHLHKCSGFTTRGLLPISRSCRSLKVLSLEDSAVI--DAGGEWLHALAQNNSVLESLNFAVVGLD-SA-S-VEDLALLVGN--CKSLVSLKVGE-VDM-------------SNLAG---------VLR-KAP-FLKELGTGTFS--DLG--DE--RMRMAVSI---KLPQHLVLLSGLWAM-----PDAGLQMVQPVAANLKKLDLTFTL-LSTRGHCELL…
	Sphagnum_fallax_0007s0313 QQ-VVALSDEN----LSRIFELIESSQERATLSLVCRQWHRVDGNTRKNISIANMYAVAPTALTRRFKCLEGIKLKGK-PRAAE---------YDLLLP--EWGGYAYPWLKELATVYE-HLKTLQLRRVEVRNADLYLLAA-APFNATLQVLHLHKCSGFTTSGLVPLSRTCRSLRVLSLEDSDVI--DEGGEWLHALAQNNSVLESLDFAVPGLD-TA-S-VEDLAFLVGR--CKSLVSLKVGD-IDM-------------SDLAG---------VLS-KVP-FLKELGTGGFS--DLG--DE--NKSMAASI---NLPQHLTSLSGLWAM-----PDLGLQMVQPVAANLKKLDLKFTV-LSCRGHCELL…
	Takakia_lepidozioides_SKQD2078338 ----------?----???????????????????????????????????????????????????????????????-?????---------??????--??????????????????-???TLQLRRMEVGDADLQLLAM-SPCSAALQVLHLHKCYGFSTRGLVPIARSCRSLRVLNLEESVVA--DDGGQWLHELAQYNSVLEVLNFAVLGMK-DI-D-MADLALLVER--CKSLVSLKVSD-IDV-------------VEVSN---------VLS-KST-SLLELGGGCCS--SLG--DH--KG-TPVCP---DLPKRVVSLSGLWAM-----TDVGLPMVLPLRENLKKLDLKFTL-LS…
	Ceratodon_purpureus_R40isotig08114 CI-NNKLPEQI----MECIFNQLDKSEDRGAASQVCKMWQRIDGLTRKMVYITNCYSIAPSDLSRRFKNLEKIKIKGK-PRAYE---------FGLLVE--NWGGHAGPWIEEIVRAYP-KLQVLHLRRMDVTDEDLELLAL-KC--TRLQKLKLHKCSGFSTKGLEFITDSCRHLRILDLEESDME--DLGGPWLQFLQKGEGTLASLNIASAGLD-EA-NVKESLHMLAPR--LKSMCSLRVSD-MDL-------------DSFIK---------ILDYSVV-PVVELGLGCYS--LR-------------------------------QV-----EPVLASSFSHRLSRVTSLDLKFAT-M…
	Ceratodon_purpureus_R40isotig13656 KK-KCLSLDET----LDLIFSYLDS-EDRASASLVCKQWHRVDGETRKYVSVSNCYAAPPSALSKRFPNVEYFKIKGK-PRAVE---------FNLLVD--DWGGYASAWVEEIVRAYP-RLHTIHFRRMDVSDNDLKLLAK-GC-GSALQVLKLDKCSGFSTLGLQFIARSCRSLRTLYLEESEIE--DEGHEWLLDLGRNVPGLERLNLASTGIE-EG-DVNDALVFLMQN--CKGLNSLKVGE-MEL-------------QNFKE---------IMKHSTI-PLLELGTGCYS--KR-------------------------------DG-----VRTFDAAFIPWVSRLRVLDLKFMN-L…
	Physcomitrella_patens_Pp3c23_18960_PpCOI3_TLP3A CI-FNQLPESV----IELIFDRLGSKGDRRAISQVCKQWHRVDGLTRKNIYIFNCYSIAPSNLSKRFPNLEKIKIKGK-PRAYE---------FGLLVE--SWGAHAGPWIEEIASVYP-NLEGLALRRMDITDKDLMLLAS-RC--PNLRKLKLHKCSGFSTRGLEFITRSCRTLRVLDIDESDME--DTGGPWLQLLEKGDGKLESLNIASAGLE-EE-SIKEVLLKLAPS--LKCISSLRVSD-MEL-------------GSFFK---------ILDNSEV-PVVELGLGCYS--LS-------------------------------QE-----DPELVPSFSSRLS…
	Physcomitrella_patens_Pp3c20_4050_PpCOI6_TLP3B CK-FNLLPEPI----IESIFNRVEARGDRNAMSQVCKLWQKMDGMTRKNIYISNCYSIAPSDVSRRFKSLQKIKIKGK-PRAYE---------FGLLVE--RWGGHAGPWIGEMSRAYP-ELLGLSMRRMDVTDNDLRILAS-RC--PKLQKLKLHKCCGFSTGGLEHITRSCRTLRVLDIEESDIE--DTGGPWLELLENSDGRLESLNIASAGLE-EE-N-IKEVLPVVGR-SLKCISSLKVSD-MEL-------------GSFFK---------ILDNSNV-PVVELGLGCYC--SS-------------------------------PE-----DPELASSFALRLSK…
	Sphagnum_fallax_0101s0030 KR-RCLTLDDS----LQCIFSCLDSYQDRAALSLVCKQWYRVDGATRKQIYIPNCYSILPSGLSKRFKDLQSIKLKGK-PRASE---------FDILEK--DWGGHTGPWVQEIVRSYP-KLQALHLRRMEICDEDLELLAR-GC--TSLQVLKLDKCKGFTTMGLQVIAQSCRFLRELSLEESEITM-DEGGQWLWELGQNNPMLEKLSIAADGLG-DN-VV-DPLLSVVQR--CKFLTALKVHD-IEI-------------EKFQE---------VLKSCSM-PMEELGVGCYR--ML-------------------------------DD-----HRLLATSLLPWISKLKILDLKFAL-LSAEEQCELL…
	Takakia_lepidozioides_SKQD2080162 VK-KCLSLDET----LECIFSYLDNPRDRGAVSRVCKQWHQVDGNTRKYVYVGNCYSIAPSALSKRFKNLKKLKLKGK-PRAVE---------YDLLED--DWGGYAGPWVREIVKAYP-RLQALHLRRMEVFDEDLEALAT-GC-GAALQVLKLHKCSGFSTAGLGFISHSCRSLRVLYLEESEIM--DEGGQWLWELGQNNPSLQSLNIVSTGLD-EV-GVVDAVRSLVQK--CKALISLKVSE-IEV-------------EKLKE---------VLKLCVM-PLEELGAGCHS--IF-------------------------------ED-----HKAVARSLLPWVSRLKILDLKFTL-LN…
	Physcomitrella_patens_Pp3c3_8580_PpCOI5_TLP3C KK-CLSVLDET----LDLIFSYLDP-EDRASASLVCKHWHRVDGETREQVSVSNCYSVSPSALSKRFPNIEKFKIKGK-PRAVE---------FNLLVD--DWGGYASAWVEEIVRAYP-RLHTLHFRRMDVSDDDLKILAQ-GC-GSALQVLKLDKCSGFSTLGLQHIARSCRSLKTLYLEESDIE--DEGHEWLLDLGRNVPGLERLNLASTGIE-EG-DVNDVLVVLMQN--CKSLNSLKVGE-MTL-------------ENFKE---------IMKYSTT-PLLELGNGCYS--MR-------------------------------NG-----VRTFDAAFIPWVSRL…
	Sphagnum_fallax_0024s0126 AK-KCLVLDEI----LGCIFSYLQEPDDRQAISQVSKRWHKMDGETRKCVSVSNCYSIAPSALSKRFKNLEKFKLKGK-PRAAE---------FDLLVE--NWGGYAGPWIQEIVKAYP-SLKFLHLRRMEVSDKDLEILGH-GC-GAALQVLKLDKCSGFSTLGLKYIAQTCRSLKMLYLEESKIE--DQGGQWLFELAENNPCLESLNISATELD-DV-NISEALLSLVQK--CTALTSLKVGE-IEL-------------ETLQE---------IMNYTSM-RLNEFGAGCYT--LL-------------------------------QD-----PDLVTASLILWVTKLKILDLKYAS-LSAEGHCQVL…
	Sphagnum_fallax_0143s0045 GK-RCLSLDET----LGCIFEHLRDPDDRRNISLVSKQWHRVDGETRKYVSVSNCYSIAPSALSKRFKNLESFKLKGK-PRAVE---------FDLLVD--NWGGYAGPWIQELVKAYP-SLKHLHLHRMEVLDTDLELLAH-GC-SAALQVLKLSKCSGFSTAGLKSIAQACRSLRMLNLEESKID--DQRGEWLFHLGDNNPCLESLNITSMDLD-EL-NIREALLSLVQK--CPALSSLKMGE-IEL-------------ETLKE---------IMKYMSM-RLEAFGAGCYT--LQ-------------------------------EE-----D-RLVTAFIPWVTKLKILDLKYTS-LSAEGHCQIL…
	Marchantia_polymorpha_JPYU2009914 -G-ANRVSDET----LGCIFAHLDSPGDRKAVSQVCRQWRRVDANTRKHVSIANCYSVAPAALSRRFPNLQSLKIKGK-PRAFE---------YELLVP--NWGGYARPWVAEVARGYAQRLQSLWLRRMHVTDADLTLLAQ-SC-SESLQVLKLHKCSGFSTSGIHDITTYCRSLRVLYLEESAISPSG??GEWLHELALNNTTLEDLNFQYLHED-DI-S-ITDLEGVVEN--CRSLRSLKVSE-IDI-------------LDMRG---------VLS-KAH-NLREHGTGCCA--SIG--DP--L--RAGGV---DLPRTIIALSGLYEL-----NEIGLPMVANLLPNLKKLDLKYTL-LS…
	Porella_navicularis_KRUQ_2018762 -G-ASRVSDET----LGYIFSHLDNPADRRAVSQVCKQWKRVDSNTREYVQLVNCYCVAPAMLSRRFPNLLSLKIKGK-PRADD---------FGLIPA--NWGGYATPWVAEVARAYTQKLQSLWLRRMQVTDADLKLLAQ-SC-STSLVTLKLHKCSGFSTVGLADITASCRSLKVLFMEECVIDGPESANKWLHELADHNNGLEELNFQYTSGD-DI-D-VNSLEVLVAN--CKALRSLKVNE-IDI-------------VEMGK---------VLS-KTS-TLLELGTGSCN--TLG--DP--QF-SPPMI---VLPKSVISLSGLFYL-----SDNCVPMMSSILGNLKKLHLQYVY-LTE…
;
END;
begin trees;
translate
1 Cylindrocystis_brebissonii_YOXI2051391,
2 Cylindrocystis_sp_VAZE2053808,
3 Roya_obtusa_XRTZ2005787,
4 Coleochaete_scutata_VQBJ2011792,
5 Coleochaete_irregularis_QPDY2030019,
6 Cylindrocystis_cushleckae_JOJQ2003471,
7 Coleochaete_scutata_VQBJ2001142,
8 Klebsormidium_flaccidum_00434_0030,
9 Arabidopsis_thaliana_TIR1_AT3G62980,
10 Capsella_rubella_10016894m,
11 Brassica_rapa_Bra014378,
12 Brassica_rapa_Bra003518,
13 Brassica_rapa_Bra007720,
14 Cleome_hassleriana_27_119,
15 Cleome_hassleriana_8_51,
16 Gyrostemon_ramulosus_UAXP2017558,
17 Arabidopsis_thaliana_AFB1_AT4G03190,
18 Capsella_rubella_10000550m,
19 Brassica_rapa_Bra000842,
20 Brassica_rapa_Bra034191,
21 Cleome_hassleriana_7_158,
22 Gyrostemon_ramulosus_UAXP2022187,
23 Carica_papaya_9_171,
24 Moringa_oleifera_CZPV2051068,
25 Tropaeolum_peregrinum_MYZV2004789,
26 Theobroma_cacao_1EG004541t1,
27 Gossypium_raimondii_004G085900,
28 Gossypium_raimondii_004G053500,
29 Gossypium_raimondii_007G131300,
30 Gossypium_raimondii_004G140500,
31 Fragaria_vesca_24947,
32 Prunus_persica_ppa003344m,
33 Cucumis_sativus_025170,
34 Citrus_sinensis_1g007912m,
35 Populus_trichocarpa_014G134800,
36 Populus_trichocarpa_002G207800,
37 Ricinus_communis_29647_m002022,
38 Medicago_truncatula_1g088950,
39 Eucalyptus_grandis_K03439,
40 Mimulus_guttatus_D00151,
41 Mimulus_guttatus_N01403,
42 Solanum_lycopersicum_09g074520_2e,
43 Solanum_lycopersicum_06g008780,
44 Daucus_carota_018358,
45 Daucus_carota_012425,
46 Vitis_vinifera_GSVIVT01010995e,
47 Tetrastigma_voinierianum_SZPD2013286,
48 Vitis_vinifera_GSVIVT01021910e,
49 Tetrastigma_voinierianum_SZPD2013507,
50 Aquilegia_coerulea_003_00856,
51 Aquilegia_coerulea_017_00312,
52 Oryza_sativa_Os05g05800,
53 Zea_mays_GRZM2G135978,
54 Phoenix_dactylifera_30s947241g003,
55 Phoenix_dactylifera_30s894761g001e,
56 Ananas_comosus_024729,
57 Ludovia_sp_VVVV2005570,
58 Aristolochia_elegans_PAWA2008587,
59 Persea_borbonia_WIGA2018464,
60 Liriodendron_tulipifera_b3c6173,
61 Illicium_floridanum_VZCI2012927,
62 Kadsura_heteroclite_NWMY2007440,
63 Kadsura_heteroclite_NWMY2008760y2009751,
64 Arabidopsis_thaliana_AFB2_AT3G26810,
65 Capsella_rubella_10016928m,
66 Brassica_rapa_Bra032954,
67 Arabidopsis_thaliana_AFB3_AT1G12820,
68 Capsella_rubella_10012250m,
69 Brassica_rapa_Bra016754,
70 Brassica_rapa_Bra026953,
71 Cleome_hassleriana_11_48,
72 Cleome_hassleriana_4_223,
73 Gyrostemon_ramulosus_UAXP2001314,
74 Carica_papaya_70_88e,
75 Moringa_oleifera_CZPV2051073,
76 Tropaeolum_peregrinum_MYZV2009647,
77 Tropaeolum_peregrinum_MYZV2009648,
78 Populus_trichocarpa_017G061600,
79 Populus_trichocarpa_001G323100,
80 Ricinus_communis_30131_m006863,
81 Gossypium_raimondii_007G072400,
82 Gossypium_raimondii_001G273700,
83 Theobroma_cacao_1EG017309t1,
84 Citrus_sinensis_1g008325m,
85 Medicago_truncatula_7g083610,
86 Fragaria_vesca_01376,
87 Prunus_persica_ppa003465m,
88 Eucalyptus_grandis_G01952,
89 Cucumis_sativus_156100,
90 Mimulus_guttatus_F00020,
91 Mimulus_guttatus_K01481,
92 Daucus_carota_016627,
93 Tetrastigma_voinierianum_SZPD2013284,
94 Tetrastigma_voinierianum_SZPD2013285,
95 Vitis_vinifera_GSVIVT01033011e,
96 Vitis_vinifera_GSVIVT01000962e,
97 Tetrastigma_voinierianum_SZPD2013392,
98 Aquilegia_coerulea_100_00013,
99 Oryza_sativa_Os04g32460,
100 Zea_mays_GRZM2G137451,
101 Zea_mays_GRMZM5G848945,
102 Oryza_sativa_Os11g31620,
103 Zea_mays_GRMZM2G155849,
104 Phoenix_dactylifera_30s671321g002e,
105 Phoenix_dactylifera_30s803071g001,
106 Ananas_comosus_003615,
107 Ananas_comosus_017824,
108 Ludovia_sp_VVVV2008251,
109 Ludovia_sp_VVVV2008253,
110 Liriodendron_tulipifera_b3c3369,
111 Persea_borbonia_WIGA2015023,
112 Illicium_floridanum_VZCI2004098,
113 Illicium_floridanum_VZCI2004099,
114 Kadsura_heteroclite_NWMY2006168,
115 Nymphaea_sp_PZRT2015547,
116 Nuphar_advena_c5590,
117 Nuphar_advena_c6931,
118 Amborella_trichopoda_16_85,
119 Pinus_taeda_jcf7180063200655e,
120 Podocarpus_rubens_XLGK2059681,
121 Cycas_micholitzii_XZUY2010422,
122 Salvinia_cucullata_v1_1_s0052_g014055,
123 Woodsia_scopulina_YJJY2016589,
124 Polypodium_glycyrrhiza_CJNT2081193,
125 Adiantum_tenerum_BMJR2063861,
126 Adiantum_tenerum_BMJR2063507,
127 Polypodium_hesperium_ZRAV2024579,
128 Lygodium_japonicum_PBUU2078971,
129 Lygodium_japonicum_PBUU2014103,
130 Equisetum_hymale_JVSZ2013698,
131 Equisetum_hymale_JVSZ2128307e,
132 Angiopteris_evecta_NHCM2014367,
133 Angiopteris_evecta_NHCM2009296,
134 Sceptridium_dissectum_EEAQ2001179,
135 Carica_papaya_27_130,
136 Moringa_oleifera_CZPV2013286,
137 Tropaeolum_peregrinum_MYZV2059535,
138 Populus_trichocarpa_004G033900,
139 Populus_trichocarpa_011G042400,
140 Ricinus_communis_29933_m001427,
141 Theobroma_cacao_1EG029995t1,
142 Theobroma_cacao_1EG029996t1,
143 Gossypium_raimondii_011G023100,
144 Citrus_sinensis_1g007916me,
145 Citrus_sinensis_1g008051m,
146 Eucalyptus_grandis_D00718,
147 Eucalyptus_grandis_D00716,
148 Medicago_truncatula_4g091290,
149 Medicago_truncatula_8g098695,
150 Prunus_persica_ppa003317m,
151 Prunus_persica_ppa003070m,
152 Cucumis_sativus_045860,
153 Vitis_vinifera_GSVIVT01003183e,
154 Tetrastigma_voinierianum_SZPD2065581e,
155 Mimulus_guttatus_H01518,
156 Mimulus_guttatus_M01216,
157 Solanum_lycopersicum_02g079190,
158 Daucus_carota_004140e,
159 Daucus_carota_008072e,
160 Daucus_carota_028134e,
161 Aquilegia_coerulea_045_00035,
162 Aquilegia_coerulea_038_00173,
163 Phoenix_dactylifera_30s723411g001,
164 Phoenix_dactylifera_30s708451g004e,
165 Ananas_comosus_014412,
166 Ludovia_sp_VVVV2007298,
167 Persea_borbonia_WIGA2017271,
168 Liriodendron_tulipifera_b3c9921,
169 Aristolochia_elegans_PAWA2007365,
170 Nymphaea_sp_PZRT201072,
171 Nymphaea_sp_PZRT201033,
172 Nuphar_advena_c1916e,
173 Nuphar_advena_c4334e,
174 Amborella_trichopoda_3_426,
175 Pinus_taeda_AFB6_jcf7180063161870,
176 Podocarpus_rubens_XLGK2059638,
177 Cycas_micholitzii_XZUY2000678,
178 Cycas_micholitzii_XZUY2000679,
179 Podocarpus_rubens_XLGK2008898,
180 Woodsia_scopulina_YJJY2013966,
181 Polypodium_glycyrrhiza_CJNT2081249,
182 Adiantum_tenerum_BMJR2014124,
183 Lygodium_japonicum_PBUU2005497,
184 Psilotum_nudum_QVMR2009419e,
185 Sceptridium_dissectum_EEAQ2015751,
186 Angiopteris_evecta_NHCM2014432e,
187 Arabidopsis_thaliana_AFB4_AT4g24390,
188 Capsella_rubella_10006645m,
189 Brassica_rapa_Bra013798,
190 Arabidopsis_thaliana_AFB5_AT5G49980,
191 Capsella_rubella_10026074m,
192 Brassica_rapa_Bra000604,
193 Cleome_hassleriana_1_128,
194 Cleome_hassleriana_87_85,
195 Gyrostemon_ramulosus_UAXP2000810,
196 Gyrostemon_ramulosus_UAXP_2000808,
197 Carica_papaya_827_1,
198 Moringa_oleifera_CZPV2012498,
199 Tropaeolum_peregrinum_MYZV2013024,
200 Gossypium_raimondii_009G232000,
201 Gossypium_raimondii_010G036400,
202 Theobroma_cacao_1EG034465t1e,
203 Citrus_sinensis_1g044749e,
204 Fragaria_vesca_12066,
205 Prunus_persica_ppa003137m,
206 Cucumis_sativus_311790,
207 Cucumis_sativus_311780e,
208 Medicago_truncatula_3g100860,
209 Medicago_truncatula_5g065490,
210 Pisum_sativa_RMS2,
211 Populus_trichocarpa_005G159300,
212 Populus_trichocarpa_002G102700,
213 Ricinus_communis_29908_m006223,
214 Solanum_lycopersicum_04g074980,
215 Daucus_carota_012874e,
216 Daucus_carota_019294ps,
217 Tetrastigma_voinierianum_SZPD2007172,
218 Vitis_vinifera_GSVIVT01009126e,
219 Aquilegia_coerulea_015_00210,
220 Aquilegia_coerulea_007_00541,
221 Zea_mays_GRMZM2G024180,
222 Zea_mays_GRMZM2G427529,
223 Oryza_sativa_Os02g52230,
224 Phoenix_dactylifera_30s889331g003,
225 Phoenix_dactylifera_30s1085301g001e,
226 Zea_mays_GRMZM2G095786,
227 Zea_mays_GRMZM2G398848,
228 Oryza_sativa_Os03g08850,
229 Phoenix_dactylifera_30s1102061g002e,
230 Phoenix_dactylifera_30s960401g001e,
231 Ananas_comosus_002748,
232 Ananas_comosus_004045,
233 Ludovia_sp_VVVV2009273,
234 Persea_borbonia_WIGA2017371,
235 Aristolochia_elegans_PAWA2012787,
236 Liriodendron_tulipifera_b3c1209,
237 Illicium_floridanum_VZCI2009661,
238 Illicium_floridanum_VZCI2008813y2104267,
239 Nymphaea_sp_PZRT2008436y7,
240 Nuphar_advena_c6523,
241 Amborella_trichopoda_135_41,
242 Pinus_taeda_AFB4A_jcf7180063005822plus,
243 Cycas_micholitzii_XZUY2043171e,
244 Podocarpus_rubens_XLGK2007916,
245 Pinus_taeda_AFB4B_jcf7180062969053,
246 Podocarpus_rubens_XLGK2060230,
247 Podocarpus_rubens_XLGK2008643,
248 Cycas_micholitzii_XZUY2007648e,
249 Woodsia_scopulina_YJJY2013306,
250 Polypodium_glycyrrhiza_CJNT2013689,
251 Adiantum_tenerum_BMJR2007379,
252 Azolla_filiculoides_s0065_g035892,
253 Azolla_filiculoides_s0005_g009183,
254 Salvinia_cucullata_v1_1_s0032_g010765,
255 Lygodium_japonicum_PBUU2078568,
256 Equisetum_hymale_JVSZ2007197e,
257 Equisetum_hymale_JVSZ2014825,
258 Psilotum_nudum_QVMR2005872,
259 Psilotum_nudum_QVMR2055186e,
260 Sceptridium_dissectum_EEAQ2089860,
261 Psilotum_nudum_QVMR2009847e,
262 Angiopteris_evecta_NHCM2010885,
263 Polypodium_glycyrrhiza_CJNT2002396,
264 Polypodium_glycyrrhiza_CJNT2002398,
265 Polypodium_glycyrrhiza_CJNT2002397,
266 Woodsia_scopulina_YJJY2016328,
267 Adiantum_tenerum_BMJR2008896,
268 Azolla_filiculoides_s0063_g035344,
269 Salvinia_cucullata_v1_1_s0044_g013019,
270 Selaginella_moellendorffii_170974_SmAFB1,
271 Selaginella_acanthonota_ZYCD2008394,
272 Selaginella_acanthonota_ZYCD2042543,
273 Huperzia_squarrosa_GAON2016718,
274 Selaginella_moellendorffii_168175_SmAFB2,
275 Selaginella_acanthonota_ZYCD2009793,
276 Huperzia_squarrosa_GAON2000046e,
277 Huperzia_squarrosa_GAON2056156e,
278 Huperzia_squarrosa_GAON2003633,
279 Diphasiastrum_digitatum_WAFT2002776,
280 Diphasiastrum_digitatum_WAFT2002775e,
281 Diphasiastrum_digitatum_WAFT2066105e,
282 Diphasiastrum_digitatum_WAFT2057170e,
283 Diphasiastrum_digitatum_WAFT2010634,
284 Megaceros_vincentianus_TCBC2006906e,
285 Nothoceros_aenigmaticus_DXOU2003633e,
286 Physcomitrella_patens_Pp3c23_5870_PpAFB1_TIRA2,
287 Physcomitrella_patens_Pp3c20_17150_PpAFB2_TIRA1,
288 Physcomitrella_patens_Pp3c23_11300_PpAFB3_TIRB1,
289 Physcomitrella_patens_Pp3c24_9800_PpAFB4_TIRB2,
290 Ceratodon_purpureus_CerpuR40isotig08575,
291 Ceratodon_purpureus_CerpuR40isotig08655,
292 Pohlia_nutans_GACA01002477,
293 Pohlia_nutans_GACA01003999,
294 Polytrichum_commune_SZYG2000956,
295 Sphagnum_fallax_0112s0055,
296 Sphagnum_fallax_0030s0089,
297 Sphagnum_fallax_0185s0029,
298 Sphagnum_fallax_0423s0002,
299 Sphagnum_fallax_0112s0054,
300 Takakia_lepidozioides_SKQD2000878,
301 Marchantia_polymorpha_Mapoly0035s0062_MpTIR1,
302 Porella_navicularis_KRUQ2114273,
303 Selaginella_moellendorffii_104859_SmXFB1,
304 Selaginella_acanthonota_ZYCD2003560,
305 Physcomitrella_patens_Pp3c22_6020_PpXFB1_TLP1A,
306 Physcomitrella_patens_Pp3c18_16630_PpXFB2_TLP1B,
307 Ceratodon_purpureus_R40isotig09515,
308 Ceratodon_purpureus_R40isotig09604,
309 Pohlia_nutans_GACA01031966,
310 Pohlia_nutans_GACA01030051,
311 Pohlia_nutans_GACA01043004,
312 Sphagnum_fallax_0005s0348,
313 Sphagnum_fallax_0010s0248,
314 Sphagnum_fallax_0092s0048,
315 Takakia_lepidozioides_SKQD2008822,
316 Arabidopsis_thaliana_COI1_At2g39940,
317 Pinus_taeda_PITA_08921_COI1A,
318 Pinus_taeda_COI1B,
319 Pinus_taeda_COI1C,
320 Salvinia_cucullata_v1_1_s0008_g004038,
321 Salvinia_cucullata_v1_1_s0096_g019379,
322 Salvinia_cucullata_v1_1_s0102_g019858,
323 Salvinia_cucullata_v1_1_s0016_g006874,
324 Azolla_filiculoides_s0015_g013877,
325 Azolla_filiculoides_s0290_g063306,
326 Azolla_filiculoides_s0568_g077530,
327 Azolla_filiculoides_s3188_g114985,
328 Selaginella_moellendorffii_163526,
329 Selaginella_moellendorffii_75487,
330 Selaginella_moellendorffii_11318,
331 Selaginella_moellendorffii_84100,
332 Selaginella_acanthonota_ZYCD2009664,
333 Selaginella_acanthonota_ZYCD2009744,
334 Huperzia_squarrosa_GAON_2009932,
335 Megaceros_vincentianus_TCBC2020867,
336 Nothoceros_aenigmaticus_DXOU2037633,
337 Megaceros_vincentianus_TCBC2008377,
338 Physcomitrella_patens_Pp3c17_7680_PpCOI1_TLP2A,
339 Physcomitrella_patens_Pp3c15_1200_PpCOI2_TLP2B,
340 Physcomitrella_patens_Pp3c9_10120_PpCOI4,
341 Ceratodon_purpureus_R40isotig09339,
342 Sphagnum_fallax_0011s0041,
343 Sphagnum_fallax_0013s0244,
344 Sphagnum_fallax_0014s0245,
345 Sphagnum_fallax_0007s0313,
346 Takakia_lepidozioides_SKQD2078338,
347 Ceratodon_purpureus_R40isotig08114,
348 Ceratodon_purpureus_R40isotig13656,
349 Physcomitrella_patens_Pp3c23_18960_PpCOI3_TLP3A,
350 Physcomitrella_patens_Pp3c20_4050_PpCOI6_TLP3B,
351 Sphagnum_fallax_0101s0030,
352 Takakia_lepidozioides_SKQD2080162,
353 Physcomitrella_patens_Pp3c3_8580_PpCOI5_TLP3C,
354 Sphagnum_fallax_0024s0126,
355 Sphagnum_fallax_0143s0045,
356 Marchantia_polymorpha_JPYU2009914,
357 Porella_navicularis_KRUQ_2018762;
tree best1 = [&U] (2:1.906891e-01,((((7:1.184348e+00,(4:1.361580e-01,5:2.562465e-01):1.038310e+00):5.367268e-01,(((((280:8.291797e-02,(276:1.320817e-01,279:7.352767e-02):9.732326e-03):1.377837e-01,((275:3.662351e-01,274:2.669249e-01):2.825390e-01,(((273:8.234652e-02,281:4.930356e-02):1.231453e-01,((271:2.341480e-01,270:1.598484e-01):1.562840e-01,272:3.531730e-01):4.210547e-02):4.237178e-02,((((((…
end;
BEGIN mrbayes;
	set autoclose=no nowarn=no;
prset aamodelpr=mixed;
lset nst=6 rates=invgamma;
	mcmcp nruns=3 nchains=4 ngen=10000000 temp=0.5 savebrlens=yes filename=FB_181119;
	startvals tau=best1 V=best1;
END;
