# Supplementary material for: Genetic analysis of the Arabidopsis TIR1/AFB auxin receptors reveals both overlapping and specialized functions
Source: eLife. 2020 Feb 18;9:e54740. doi: 10.7554/eLife.54740 (PMC7048394; doi:10.7554/eLife.54740)
Supplement: Supplementary file 6. [file elife-54740-supp6.nex]

#NEXUS

BEGIN DATA;
	DIMENSIONS NTAX=52 NCHAR=1806;
	FORMAT DATATYPE=DNA  MISSING=? GAP=- ;
	MATRIX

	Carica_papaya_9_171                                 ATGCAG---AAGAGAATGGCGGTGTCGTTCCCCGAGGAGGTGCTGGAGCACGTGTTCTCGTTCATTCGGACGGACAAGGACAGGAACTCGATATCGCTGGTGTGCAAGTCGTGGTACGAGGTCGAGCGCTGGTGCAGGAGGAGGATATTTGTGGGGAACTGTTACGCGGTGAACCCTAGGATGGTGATTAGACGGTTCCCGGAGGTGAGATCCGTGGAGCTCAAAGGAAAGCCGCACTTCGCGGACTTCAACCTCGTGCCTGAAGGTTGGGGCGGGTACGTCTACCCGTGGATCCTGGCCATGGCTACGGCGTACCCGTGGCTTGAGGAGATACGTTTGAAGAGGATGGTTGTCACCGATGAGAGTCTGGAGCTGATCGCCAAGTCGTTTAAGAACTTCAAGGTCCTTGTGCTCTGTTCCTGTGATGGCTTCTCAACTGATGGGCTAGCTGCCATTGCTGCTAATTGCGGAAATCTCAAAGAGCTTGACTTGCGGGAGTGTGATGTGGATGATTTGAGTGGACATTGGCTCAGCCAATTTCCAGAGACATGCACATCTCTGGTGTCCATTAATATC-CTTGCCTGAGCTCCGAGGTTAGTTTCTCAGCCTTGGACCGTCTGGTGGGCAGGTGCCCCAATCTAAGGACTCTCCGGCTCAATCGCGCTGTGCCTCTAGATAGGCTTGCTAGTCTACTTCGTCGGGCACCTCAACTGGTTGAGTTGGGCACGGGTGCTTATTCTGCTGAGCTGCGGCCAGATGTCTTCACAAAGTTAGCTGGAGCTTTCTCGGGATGCAAGAAATTGAAGAGCTTGTCCGGGTTTTGGGATGTTGTCCCAGGTTACCTCCCAGCAGTTTATTCTGTCTGCTCTGGAATAACATCATTAAACTTGAGTTATGCCACTATCCAAAGCCCTGATCTTATCAAGCTTGTTAGCCAGTGCCCAAATTTGCAGCGCCTTTTGGTGTTTGATTACATAGAAGACAGTGGCCTCGAGGCTCTTGCAGCTTGCTGCAAGGACCTTCAAGAATTGAGGGTGTTTCCATCTGCTCCTTTC---GCTGCAGGGCCAAATGTAGCCTTAACAGAACAGGGTCTTGTCTCTGTGTCTGAGGGCTGTCCTAAGCTCCAGTCAGTCCTGTACTTCTGCCGCCAAATGACAAATGCTGCCCTAGTTACTATTGCGAAGAACAGCCCAAACTTGACACGGTTTCGTCTTTGTATTATTGAACCACGAACCCCTGATTATCTAACCCTCGAGCCACTCGATGTGGGTTTTGGAGCCATTGTTGAACACTGCAAGGATCTCCGGCGCCTATCCCTTTCTGGTCTCCTTACAGACCGTGTTTTTGAATATATTGGGACTTGGGCAAAAAAGCTAGAGATGTTATCTGTGGCTTTTGCTGGAGATAGCGATCAAGGCCTCCATCATGTGCTATCTGGGTGTGACAGTCTACGGAAGCTAGAAATCAGGGACTGCCCATTTGGAGACAAGGCTCTTTTGGCCAATGCTGCAAAGCTGGAGACAATGCGATCCCTTTGGATGTCTTCTTGCTCTGTGAGTTTCGGAGCATGTAAGCTGCTTGGTCGGAAAATGCCGCGACTCAATGTAGAAGTTATTGATGAACAGGAATCTCCAGACGCGAGGCCAGAAAGCTGTCCTGTTGAGAAGCTCTACATATATAGAACAGTTGCAGGACCAAGATTCGATATGCCTGCATTTGTTTGGACCATGGATGAA---GAATCCGCATTGAGTCTC---------------------------------------ACTTGA
	Moringa_oleifera_CZPV2051068                        ATGCAG---AAGAGAATGGCTATATCGTTTCCCGAAGATGTGCTGGAGCACGTGTTCTCGTTCATTCAATCGGACAAGGATAGGAACGCTTTATCGCTGGTTTGTAAATCGTGGTACGAGATCGAGCGCTGGTGCAGGAGGAGGATATTCGTTGGGAACTGCTACGCTGTGAGCCCTAGAATGGTGATCAGGCGGTTCCCGGACGTGAGATCCGTGGAGCTCAAAGGGAAGCCGCACTTCGCGGACTTCAACCTGGTGCCTGACGGGTGGGGCGGGTACGTGTACCCATGGATCACTGCGATGGCCACAGCATATCCGTGGCTCGAGGAAATACGGTTGAAGAGGATGGTGGTCACTGACGAGAGCCTGGAGCTGATCGCCAAGTCGTTTAAAAACTTCAAGGTTCTTGTGCTTTCGTCCTGTGAGGGTTTCTCCACTGATGGGCTCGCTGCCATTGCGGCCAATTGCAGACATCTGAGAGAGCTTGACCTGCAGGAGAGTGAAGTGGATGATCTGAGTGGGCATTGGCTAAGCCATTTTCCAGATACTTTCACCTCACTGGCGTCTCTTAACATT-CCTGCCTATTGTCTGAGGTTACTTTCTCAGCCTTGGAACGCCTGGTGGGCAGGTGTCCCAATCTGAGGACTCTCAGACTCAACCGTGCTGTACCTCTTGACAAGCTTGCAAGCCTACTCCGCCGGGCACCCCAACTTGTTGAGTTTGGGACGGGTGCTTACTCTTCTGAATTGCGTCCAGATGATTTCTCAAACTTGACAGGAGCTTTTTCAGGCTGCAAAGAATTGAAGAGCTTGTCTGGTTTTTGGGATGTGGTTCCAGGTTACCTGCCAGCAATTTATTCTGTCTGCTCTGGTCTAACATCATTGAACTTGAGTTATGCCACTATCCAGAGCACTGATCTTATCAAGCTTGTTAGCCAATGTCCGAATTTGCAGCGTCTTTGGGTGCTGGATTACATAGAAGACAGCGGCCTTGAAGCTCTTGCATCCTGTTGCAAGGACCTGCGAGAATTGAGGGTGTTTCCATCTGATCCATTT---GTTGTGGAGCCAAATGTCTCCTTGACAGAACAGGGCCTTGTCTCTGTTTCTGAGGGCTGTCCAAAGCTCCAATCAGTTCTTTATTTCTGCCGCCAAATGACTAATGCTGCCTTGGTCACCATTGCTAGGAATAGGCAAAACCTGACTCGTTTTCGGCTTTGTATTATTGAGCCACGAACCCCTGATTATGTGACCCTTGAGCCACTTGATGTGGGTTTTGGAGCCATTGTTGAGCACTGCAAGGATCTCCGGCGTCTTTCACTTTCAGGTCTCCTAACTGATCGTGTATTTGAGTACATTGGGACTTATGCCAAAAAGTTAGAGATGCTGTCTGTGGCTTTTGCTGGAGACAGTGATCTGGGTCTCCATCATGTGCTATCTGGGTGTGAAAGTCTACGGAAACTGGAAATTAGAGACTGCCCCTTTGGGGACAAGGCTCTTTTGGCTAATGCTGCTAAACTGGAGACAATGCGATCCCTTTGGATGTCTTCTTGCTCTGTGAGTTTCGGAGCATGTAAGCTGCTAGGTCACAAGATGCCGAGACTAAATGTAGAAGTTATTGACGAGCAGGGAACCCCAGATTCCAGGCCGGAGAGCTGCGCTGTTGAAAAGCTCTACATATATAGGACTGTTGCTGGGCCAAGGTTTGACATGCCTGGTTTTGTTTGGACTATGGATGAA---GATTCTGCATTAAGGCTA---------------------------------------TCTTGA
	Arabidopsis_thaliana_AT3G62980_TIR1                 ATGCAG---AAGCGAATAGCCTTGTCGTTTCCAGAAGAGGTACTAGAGCATGTGTTCTCGTTTATTCAGCTGGATAAGGATAGGAACTCAGTCTCTCTGGTGTGCAAGTCATGGTACGAGATCGAGCGGTGGTGCAGGAGGAAAGTCTTCATCGGGAACTGCTACGCCGTGAGTCCAGCGACGGTGATTAGGAGGTTCCCGAAAGTGAGATCCGTGGAGCTTAAAGGAAAACCTCACTTTGCTGACTTTAATTTGGTACCTGACGGATGGGGAGGTTACGTGTATCCATGGATTGAGGCCATGTCTTCGTCTTACACGTGGCTTGAAGAGATAAGGCTGAAGAGGATGGTGGTCACCGACGATTGCTTGGAGCTCATAGCCAAGTCTTTTAAGAATTTTAAGGTTCTTGTGCTTTCTTCCTGCGAAGGCTTCTCCACCGATGGTCTCGCTGCTATCGCTGCCACTTGCAGGAATCTGAAAGAGCTTGACTTACGAGAGAGTGATGTTGACGACGTTAGTGGCCACTGGCTTAGCCATTTCCCAGATACATACACTTCTTTGGTATCACTCAATATATCTTGCTTAGCATCTGAGGTCAGTTTCTCTGCTCTGGAAAGGCTGGTGACTAGGTGTCCCAATCTCAAGTCTCTCAAGCTTAACCGAGCTGTTCCACTTGAAAAATTGGCTACTTTACTTCAAAGAGCACCTCAATTGGAGGAATTGGGCACTGGTGGGTACACTGCAGAAGTGCGACCAGATGTTTACTCTGGTTTATCTGTAGCGCTCTCTGGGTGCAAGGAATTGAGGTGCTTATCTGGATTTTGGGATGCTGTTCCTGCCTATCTTCCAGCAGTTTATTCGGTTTGCAGTCGGCTTACAACTTTGAATCTGAGTTATGCAACAGTCCAGAGCTATGATCTTGTCAAGCTTCTTTGTCAATGCCCTAAACTGCAGCGCCTCTGGGTGCTTGACTACATCGAGGATGCTGGTCTTGAGGTGCTTGCTTCAACCTGCAAGGACCTACGCGAGCTGAGAGTGTTTCCGTCCGAGCCTTTT---GTCATGGAACCAAATGTGGCATTGACGGAACAGGGGCTTGTCTCCGTCTCCATGGGCTGTCCAAAACTCGAGTCGGTTCTCTACTTCTGCCGTCAAATGACCAATGCTGCATTGATAACCATTGCTAGGAACCGTCCCAACATGACTCGCTTCCGTTTGTGCATCATTGAGCCAAAAGCCCCAGACTATCTGACTCTAGAGCCACTGGATATTGGATTTGGAGCCATAGTAGAGCACTGCAAGGATCTCCGTCGCCTCTCTCTATCTGGCCTCTTGACCGACAAGGTTTTTGAATACATTGGGACATATGCCAAGAAGATGGAAATGCTCTCAGTGGCATTTGCAGGAGACAGTGACTTAGGCATGCATCATGTTTTGTCCGGGTGCGATAGCTTGAGGAAACTAGAGATAAGGGACTGCCCGTTTGGAGACAAGGCGCTTTTGGCCAATGCTTCAAAGCTGGAGACAATGCGATCCCTTTGGATGTCTTCTTGTTCCGTGAGTTTTGGAGCCTGCAAGTTACTAGGACAGAAGATGCCAAAGCTGAATGTGGAAGTCATCGATGAACGGGGTGCACCGGACTCGAGACCAGAGAGCTGCCCTGTTGAGAGAGTCTTCATATACCGAACAGTGGCTGGTCCTCGATTTGACATGCCTGGCTTCGTCTGGAACATGGACCAA---GACTCAACAATGAGGTTTTCCAGGCAAATCATTACTACTAACGGA------------TTATAA
	Arabidopsis_halleri_4543s0001                       ATGCAG---AAGCGAATAGCCTTGTCGTTTCCAGAAGAGGTGCTTGAGCATGTATTCTCGTTTATTCAGCTGGATAAGGATAGGAACTCGGTCTCTCTGGTGTGCAAGTCATGGTACGAGATCGAGCGGTGGTGCAGGAGGAAAGTCTTCATCGGGAACTGTTACGCCGTGAGTCCAGCGACGGTGATTAGGAGGTTCCCGAAAGTGAGATCCGTGGAGCTC????????????????????????????????????????????????????????????????????????-?????????????????????????????????????-?????????????????????????????????????????????????-??????????????????????????????????????????????????????????????????????????????????TGCAGGAATCTGAAAGAGCTTGATTTACGCGAGAGTGAGGTTGACGATGTTAGTGGCCATTGGCTTAGCCATTTCCCAGATACTTACACATCTTTGGTATCACTCAATATCTCTTGCTTAGCATCTGAGGTCAGTTTCTCTGCTCTGGAAAGGCTGGTGACTAGGTGTCCCAATCTCAAGTCTCTCAAGCTTAACCGATCTGTTCCCCTTGAAAAATTGGCTACTTTAATTCAAAGAGCTCCTCAATTGGAGGAATTGGGCACTGGTGGGTACACTGCAGAAGTCCGACCAGATGTTTATTCTGGTTTATCTGTAGCGCTCTCTGGATGCAAGGATTTGAAGTGCTTATCTGGATTTTGGGATGCTGTTCCTGCCTATCTTCCAGCTGTTTATTCAGTTTGCAGTCGGCTTACAACTTTGAATCTGAGTTATGCAACAGTCCACAGCTATGATCTTGTCAAGCTACTTAGTCAATGCCCAAAACTGCAGCGCCTCTGGGTGCTTGACTACATTGAGGATGCTGGTCTTGAGGTGCTTGCTTCAACCTGCAAGGACCTACGCGAGCTGAGGGTGTTTCCGTCTGAGCCTTTT---GTCATGGAACCAAATGTGGCATTGACGGAACAGGGGCTTGTCTCCGTCTCCATGGGCTGTCCAAAACTCGAGTCGGTTCTCTACTTCTGCCGTCAAATGACCAATGCTGCATTGATAACCATTGCTAGGAACCGTCCCAACATGACTCGCTTCCGCTTGTGCATCATTGAGCCAAAAGCTCCAGACTATCTGACTCTAGAGCCACTGGATGTTGGATTTGGAGCCATAGTAGAGCACTGCAAAGATCTCCGTCGCCTCTCTCTATCTGGCCTCTTGACCGACAAGGTTTTTGAATACATTGGGACATATGCCAAGAAGATGGAAATGCTCTCAGTGGCATTTGCAGGAGACAGTGACTTAGGCATGCATCATGTTTTGTCGGGGTGCGATAGCCTGAGGAAACTAGAGATAAGGGACTGCCTGTTTGGAGACAAGGCGCTTTTGGCCAATGCTTCAAAGCTGGAGACAATGCGATCCCTTTGGATGTCTTCTTGTTCCGTGAGTTTTGGAGCCTGCAAGTTATTAGGACAGAAGATGCCAAAGCTGAATGTGGAAGTCATCGATGAACGGGGTCCACCGGACTCGAGACCAGAGAGCTGCCCTGTGGAGAGAGTGTTCATTTACCGAACAGTGGCAGGTCCTCGGTTTGACATGCCTGGCTTCGTCTGGAACATGGACCAA---GACTCAACAATGAGGTTTTCCAGGAAAATCATCACTACTAACGGA------------TTATAA
	Arabidopsis_lyrata_AL5G45760                        ATGCAG---AAGCGAATAGCCTTGTCGTTCCCAGAAGAGGTGCTTGAGCATGTATTCTCGTTTATTCAGCTGGATAAGGATAGGAACTCAGTCTCTCTGGTGTGCAAGTCATGGTACGAGATCGAGCGGTGGTGCAGGAGGAAAGTCTTCATCGGGAACTGTTACGCCGTGAGTCCAGCGACGGTGATTAGGAGGTTCCCGAAAGTAAGATCCGTGGAGCTCAAGGGAAAACCTCACTTTGCTGACTTTAATTTGGTACCTGACGGATGGGGAGGTTACGTGTATCCATGGATTGAGGCTATGTCGTCGTCTTACACGTGGCTTGAAGAGATAAGGCTGAAGAGGATGGTGGTGACCGACGATTGCTTGGAGCTCATAGCCAAGTCCTTTAAGAATTTCAAGGTTCTTGTGCTTTCTTCCTGCGAAGGCTTCTCCACCGATGGTCTCGCTGCTATCGCTGCCACTTGCAGGAATCTGAAAGAACTTGATTTACGAGAGAGTGAGGTTGACGATATTAGTGGCCACTGGCTTAGCCATTTCCCAGATACTTACACATCTTTGGTATCACTCAATATCTCATGCTTAGCATCTGAGGTCAGTTTCTCTGCTCTGGAAAGGTTGGTGACTAGGTGTCCCAATCTCAAGTCTCTCAAGCTTAACCGAGCTGTTCCCCTTGAAAAATTGGCTACTTTACTTCAAAGAGCTCCTCAATTGGAGGAATTGGGCACTGGTGGGTACACTGCAGAAGTGCGACCAGATGTTTACTCTGGTTTATCGGTAGCGCTCTCTGGATGCAAGGATTTGAAGTGCTTATCTGGATTTTGGGATGCTGTTCCTGCCTATCTTCCAGCTGTTTATTCAGTTTGCAGTCGGCTTACAACTTTGAATCTGAGTTATGCAACAGTCCAGAGCTATGATCTTGTCAAGCTACTTAGTCAATGCCCAAAACTGCAGCGCCTCTGGGTGCTTGACTACATCGAGGATGCTGGTCTTGAGGTGCTTGCTTCAACCTGCAAGGACCTACGCGAGCTCAGAGTGTTTCCATCTGAGCCTTTT---GTCATGGAACCAAATGTGGCATTGACGGAACAGGGGCTTGTCTCCGTCTCCATGGGCTGTCCAAAACTCGAGTCGGTTCTCTACTTCTGCCGTCAAATGACCAATGCTGCATTGATAACCATTGCTAGGAACCGTCCCAACATGACTCGCTTCCGTTTGTGCATCATTGAGCCAAAAGCTCCAGACTATCTGACTCTAGAGCCACTTGATGTTGGATTTGGAGCCATCGTAGAGCACTGCAAAGATCTCCGTCGCCTCTCTCTATCTGGCCTCTTGACCGACAAGGTTTTTGAATACATTGGGACATATGCCAAGAAGATGGAAATGCTCTCAGTGGCATTTGCAGGAGACAGTGACTTAGGCATGCATCATGTTTTGTCGGGGTGCGATAGCCTGAGGAAACTAGAGATAAGGGACTGCCAGTTTGGAGACAAGGCGCTTTTGGCCAATGCTTCTAAGCTGGAGACAATGCGATCCCTTTGGATGTCTTCTTGTTCCGTGAGTTTTGGAGCCTGCAAGTTATTAGGACAGAAGATGCCAAAGCTGAATGTGGAAGTCATCGATGAACGGGGTCCACCGGACTCGAGACCAGAGAGCTGCCCTGTTGAGAGAGTGTTCATATACCGAACATTGGCTGGTCCTCGGTTTGACATGCCTGGCTTCGTCTGGAACATGGACCAA---GACTCAACAATGAGGTTT-CCAGGAAAATCATCACTACTAACGGA------------TTATAA
	Cardamine_hirsuta_CARHR173270                       ATGCAGAAGAAGCGATTAGCCCTATCGTTTCCAGAAGAAGTGTTGGAGCATGTGTTCTCCTTTATAAATCAGGATAAGGATAGGAACTCGGTGTCGCTGGTGTGCAAGTCATGGTACGAGATCGAGCGGTGGTGCAGGAGGAAAGTGTTCATCGGGAACTGTTACGCGGTGAGCCCAGCGACGGTGATAAGAAGGTTCCCGAAGCTGAGATCCATAGAGTTGAAAGGGAAACCTCACTTTGCTGACTTTAATTTGGTGCCTGATGGATGGGGAGGATACGTGTATCCATGGATTGAAGCGATGTCGTCATCGTACACGTGGCTTGAGGAGATAAGACTGAAGAGGATGGTGGTGACCGACGAGTGCTTGGAGCTCATAGCTAAGTCGTTTAAGAGTTTCAAAGTTCTTGTGCTTTCTTCTTGCGAAGGCTTCTCCACCGATGGTCTCGCTGCTATCGCTGCCACTTGCAGGAATCTTGAAGAGCTTGATTTGAAAGAGAGTGATGTTGACGATGTTAGTGGCCACTGGCTTAGCCATTTCCCAGACACATACACATCTTTGGTGTCACTCAATATCTCTTGCTTAGGTTCTGAGGTCAGTTTCTCTGCATTGGAAAGGCTGGTCAGTAGGTGTCCCAATCTCAAGTCTCTGAAGCTTAACCGGGCTGTTCCTCTTGAAAAATTGGCTACTTTACTTCAAAGAGCACCTCAGTTAAAGGAATTGGGCACTGGTGGCTACACTGCTGAAGTGCGACCAGATGTTTTCTCTGCTTTATCTGTAGCTCTCTCTGGTTGCAAGGACTTGAATTGTTTATCTGGATTTTGGGATGCTGTTCCTGCCTATCTTCCAGCTGTTTATTCGGTTTGCACTCGCCTAACAACCTTGAACCTGAGTTATGCAACAGTCCAGAGCTACGATCTTGTCAAGCTTCTTAGTCAATGTCCGAAACTGCAGCGCCTCTGGGTGCTGGACTACATCGAGGATACTGGTCTAGAGGTGCTTGCTTCGACCTGCAAGGACCTTCGTGAGTTGAGAGTTTTCCCGTCTGAGCCATTT---GTCATGGAACCAAACGTGTTATTGACGGAGCAGGGGCTTGTCTCGGTCTCCATGGGCTGTCCAAAACTCGAATCAGTTCTCTACTTCTGCCGTCAAATGACCAATGCTGCATTGATAACCATTGCTAGGAACCGTCCCAACATGACTCGCTTCCGTTTGTGCATCATTGAGCCAAAAGCTCCCGACTATCTGACTCTTGAGCCACTGGATGTTGGATTTGGAGCCATAGTAGAGCACTGCAAAGATCTTCGTCGCCTCTCTCTGTCAGGCCTCTTGACCGACAAGGTTTTTGAATACATTGGGACATACGCCAAGAAGATGGAAATGCTGTCAGTGGCATTTGCAGGAGACAGTGACTTAGGCATGCATCATGTATTGTCAGGGTGCGATAGCTTGAGGAAACTAGAGATAAGGGACTGCCCGTTTGGAGACAAGGCGCTTCTGGCCAATGCTTCAAAGCTGGAGACAATGCGATCCCTTTGGATGTCTTCATGTTCCGTGAGTTTTGGAGCCTGCAAGTTATTAGGACAGAAGATGCCAAAGCTCAATGTGGAAGTCATCGATGAACGGGGTTCACCAGACGCAAGACCCGAGAGCTGCCCTGTTGAGAGAGTGTTCATATACAGAACAGTGGCTGGTCCTCGGTTTGACATGCCCGGCTTCGTCTGGAACATGGACAAA---CACTCAACCATGAGGTTTTCCAGGCAAATCATCACTACTAACGGA------------TTATAA
	Boechera_stricta_13158s0300                         ATGCAG---AAGCGATTAGCCTTGTCGTTTCCAGAAGAAGTGCTTGAGCATGTGTTTTCGTTTATACATATGGATAAGGATAGGAACTCGGTCTCTCTGGTGTGCAAGTCATGGTACGAGATCGAGCGGTGGTGCAGGAGAAAAGTCTTCATCGGGAACTGTTACGCCGTCAGTCCAGCGACGGTGATTCGGAGGTTCCCGAAGGTGAGATCCGTGGAGCTTAAGGGTAAACCTCACTTTGCTGACTTTAATTTGGTGCCTGATGGATGGGGAGGTTACGTGTATCCATGGATTGAGGCGATGTCTTCGTCGTACACGTGGCTTGAAGAGATAAGGCTGAAGAGGATGGTGGTGAGCGACGAGTGCTTGGAGCTCATAGCCAAGTCGTTTAAGGATTTTAAGGTTCTAGTGCTTTCTTCCTGTGAAGGCTTCTCCACCGATGGTCTCGCTGCTATAGCTGCCACTTGCAGGAATCTTAAAGAGCTTGATTTGCGCGAGAGTGATGTTGATGATGTTAGTGGGCACTGGCTTAGCCATTTCCCAGATACATATACATCTTTGGTATCGCTCAATATCTCATGCTTAGCGTCTGAGGTCAGTTTCTCTGCTCTGGAAAGGCTGGTTACTAGGTGTCCCAATCTCAAGTCTCTGAAGCTTAACCGAGCTGTTCCTCTTGAAAAATTGGCAACTTTACTACAAAGAGCACCTCAATTGGAGGAATTGGGCACTGGTGGGTACACTGCAGAAGTGCGACCAGATGTTTACTCTGGTTTATCTGTAGCGCTCTCTGGCTGCAAGGACTTGAAGTGCTTATCTGGATTTTGGGATGCTGTTCCTGCCTATCTTCCAGCAGTTTATTCTGTTTGCAGTCGGCTCACAACTTTGAATCTGAGTTATGCAACAGTCCAGAGCTATGATCTTGTCAAGCTTCTTAGCCAATGCCCTAAACTGCAGCGCCTCTGGGTGCTTGACTACATCGAGGATGCTGGTCTGGAGGTGCTTGCTTCAACCTGCAAGGACCTACGCGAGTTGAGAGTGTTTCCGTCCGAGCCTTTT---GTCATGGAACCAAACGTGGCATTAACGGAACAGGGGCTTGTCTCCGTCTCCATGGGCTGTCCAAAACTCGAGTCAGTTCTCTACTTCTGCCGTCAAATGACCAATGCAGCATTGGTAACCATTGCTAGGAACCGTCCCAACATGACTCGCTTCCGTTTGTGCATCATTGAGCCAAAAGCCCCTGACTATCTGACTCTAGAGCCACTGGATGTTGGATTTGGAGCCATAGTAGAGCACTGCAAAGATCTCCGTCGCCTCTCTCTATCAGGCCTCTTGACCGACAAGGTTTTTGAATACATTGGGACATATGCCAAGAAGATGGAAATGCTCTCGGTGGCATTTGCAGGAGACAGTGACTTGGGCATGCATCATGTTTTGTCAGGGTGCGATAGCTTGAGGAAACTAGAGATAAGGGACTGCCCGTTTGGAGACAAGGCGCTTTTGGCCAATGCTTCAAAGCTGGAGACAATGCGATCCCTTTGGATGTCTTCTTGTTCCGTGAGTTTTGGAGCCTGCAAGCTATTAGGACAGAAGATGCCAAAACTCAATGTGGAAGTCATCGATGAACGGGGTCCACCACACTCAAGACCCGAGAGCTGCCCTGTTGAGAGAGTGTTTATATACCGAACAGTGGCTGGTCCTCGGTTTGACATGCCTGGCTTCGTCTGGAACATGGACCAA---GACTCAACAATGAGGTTTTCCAGGGAAATCATCACTACTAACGGA------------TTATAA
	Camelina_sativa_Csa05g095310                        ATGCAG---AAGCGAGTAGCCTTGTCGTTCCCAGAAGAGGTACTCGAGCACGTGTTTTCGTTTATACACCTGGATAAAGATAGGAACTCGGTGTCTCTGGTGTGCAAGTCATGGTACGAGATCGAGCGGTGGTGCCGGAGAAAAGTGTTCATCGGGAACTGTTACGCCGTGAGTCCATCTACGGTGATAAGGAGGTTTCCGAAAGTGAGATCCGTGGAGCTGAAAGGGAAACCTCACTTTGCAGACTTTAATTTGGTGCCTGAAGGATGGGGAGGTTACGTGTATCCATGGATTGAAGCCATGTCATCGTCGTACATGTGGCTTGAAGAGATAAGGCTGAAGAGGATGGTGGTGAGCGACGAGTGCTTGGAGCTTATAGCCAAGTCGTTTAAGAATTTTAAGGTTCTTGTTCTTTCTTCCTGTGATGGCTTCTCCACCGATGGTCTCGCTGCTATCGCTTCCACTTGCAGGAATCTTAAAGAGCTTGATTTGCGGGAGAGTGATGTTGATGATGTTAGTGGCCACTGGCTTAGCCATTTCCCTGATACATATACTTCTTTGGTGTCGCTTAATATCTCTTGCTTAGCATCTGAGGTCAGTTTCTCTGCTCTGGAAAGGCTCGTCACTAGGTGTCCCAATCTCAAGTCTCTCAAGCTTAACCGTGCTGTGCCTCTTGAGAAACTGGCTACTTTACTACAACGAGCTCCTCAGTTAGAGGAATTGGGCACTGGTGGGTACACTGCTGAATTGCGACCAGATGTTTACTCTGCTTTGTCTGTGGCGCTTTCTGGCTGCAAGGACTTGAAGTGCTTATCTGGATTTTGGGATGCTGTTCCTGCCTATCTTCCAGCTGTTTATTCTCTTTGCAGTCGCCTCACTACTTTGAATTTGAGTTATGCAACTGTCCAGAGCTATGATCTTGTCAAGCTTCTTAGCCAATGTCCTAAACTGCAGCGCCTCTGGGTGCTTGACTACATCGAGGATGCTGGTCTAGAGGTGCTTGCTTCAACCTGCAAGGACCTACGCGAGTTAAGAGTGTTTCCGTCTGAGCCTTTT---GTCATGGAACCAAACGTGGCATTAACCGAACAGGGGCTTGTCTCCGTCTCCATGGGCTGTCCAAAACTCGAGTCAGTTCTCTACTTTTGCCGTCAAATGACCAATGCTGCATTGGTAACCATTGCTAGGAACCGTCCCAACATGACTCGCTTCCGTTTGTGCATCATTGAGCCGAAAGCCCCCGACTATCTGACTTTAGAGCCTCTGGATGTTGGATTTGGAGCCATAGTAGAGCATTGCAAAGATCTCCGTCGCCTCTCTTTATCAGGCCTCTTGACAGACAAGGTTTTTGAATACATTGGGACATATGCCAAGAAGATGGAAATGCTCTCGGTGGCGTTTGCAGGAGACAGTGACTTGGGCATGCATCATGTTTTGTCAGGGTGCGATAGCCTGAGGAAACTAGAGATAAGGGACTGCCCGTTTGGAGACAAGGCGCTTTTGGCCAATGCTTCAAAGCTGGAGACAATGCGATCCCTTTGGATGTCTTCTTGTTCCGTGAGTTTTGGAGCCTGCAAGTTACTAGGACAGAAGATGCCAAAGCTCAATGTGGAAGTCATCGATGAACGGGGTCCACCAGACTCAAGACCCGAGAGCTGCCCTGTTGAGAGAGTGTTTATATACAGAACAGTGGCTGGTCCTCGGTTTGACATGCCTGGCTTCGTCTGGAACATGGACCAA---GACTCAACAATGAGGTTTTCCAGGGAAATCATCACTACTAACGGA------------TTATAA
	Camelina_sativa_Csa07g001640                        ATGCAG---AAGCGAGTAGCCTTGTCGTTCCCAGAAGAGGTGCTCGAGCACGTGTTTTCGTTTATACACCTGGATAAGGATAGGAACTCGGTGTCTCTGGTGTGCAAGTCATGGTACGAGATCGAGCGGTGGTGCCGGAGGAAAGTGTTCATCGGGAACTGTTACGCCGTGAGTCCATCGACGGTGATAAGGAGGTTCCCGAAAGTGAGATCCGTGGAGCTGAAGGGGAAGCCTCACTTCGCAGACTTTAATTTGGTGCCTGAAGGATGGGGAGGCTACGTGTACCCGTGGATAGAGGCCATGTCATCGTCGTACACGTGGCTGGAAGAGATAAGGCTGAAGAGGATGGTGGTGAGCGACGATTGCTTGGAGCTCATAGCCAAGTCGTTTAAGAATTTTAAGGTTCTTGTGCTTTCTTCCTGTGAAGGCTTCTCCACCGATGGTCTCGCTGCTATCGCTTCCACTTGCAGGAATCTTAAAGAGCTTGATTTGCGCGAGAGTGATGTTGATGATGTTAGTGGCCACTGGCTTAGCCATTTCCCGGATACATATACTTCTTTGGTGTCGCTTAATATCTCTTGCTTAGCATCTGAGGTCAGTTTCTCTGCTCTGGAAAGGCTCGTCACTAGGTGCCCCAATCTCAAGTCTCTAAAGCTTAACCGTGCTGTGCCTCTTGAGAAACTGGCTACTTTACTACAAAGAGCTCCTCAGTTAGAGGAATTGGGCACTGGTGGGTACACTGCTGAATTGCGACCAGATGTTTACTCTGCTTTATCTGTTGCGCTTTCTGGCTGCAAGGACTTGAAGTGCTTATCTGGATTTTGGGATGCTGTTCCTGCCTATCTTCCAGCTGTTTATTCTCTTTGCAGTCGCCTCACTACTTTGAATTTGAGTTATGCAACTGTCCAGAGCTATGATCTTGTCAAGCTTCTTAGCCAATGTCCAAAACTGCAGCGCCTCTGGGTGCTTGACTACATCGAGGATGCTGGTCTGGAGGTGCTTGCTTCAACCTGCAAGGACTTACGCGAGTTAAGAGTGTTTCCGTCTGAGCCTTTT---GTCATGGAACCAAACGTGGCATTAACGGAACAGGGGCTTGTCTCCGTCTCCATGGGCTGTCCAAAACTCGAGTCAGTTCTCTACTTTTGCCGTCAAATGACCAATGCTGCATTGATAACCATTGCTAGGAACCGTCCCAACATGACTCGCTTCCGTTTGTGCATCATTGAGCCGAAAGCCCCCGACTATCTGACTTTAGAGCCACTGGATGTTGGATTTGGAGCCATAGTAGAGCATTGCAAAGATCTCCGTCGCCTCTCTTTATCAGGCCTCTTGACAGACAAGGTTTTTGAATACATTGGGACATATGCCAAGAAGATGGAAATGCTCTCGGTGGCGTTTGCAGGAGACAGTGACTTGGGCATGCATCATGTTTTGTCAGGGTGCGATAGCCTGAGGAAACTAGAGATAAGGGACTGCCCGTTTGGAGACAAGGCGCTTTTGGCCAATGCTTCAAAGCTGGAGACAATGCGATCCCTTTGGATGTCTTCTTGTTCCGTGAGTTTTGGAGCCTGCAAGTGTCTAGGACAGAAGATGCCAAAGCTCAATGTGGAAGTCATCGATGAACGGGGTCCACCAGACTCAAGACCCGAGAGCTGCCCTGTTGAGAGAGTGTTTATATACAGAACAGTGGCTGGTCCTCGGTTTGACATGCCTGGCTTCGTCTGGAACATGGACCAA---GACTCAACAATGAGGTTTTCCAGGGAAATCATCACTACTAATGGA------------TTATAA
	Camelina_sativa_Csa16g001640                        ATGCAG---AAGCGAGTAGCCTTGTCGTTCCCAGAAGAGGTGCTCGAGCACGTGTTTTCGTTTATACACCTAGATAAGGATAGGAACTCGGTGTCTCTGGTGTGCAAGTCATGGTACGAGATCGAGCGGTGGTGCCGGAGGAAAGTGTTCATCGGGAACTGTTACGCCGTGAGTCCATCGACGGTGATAAGGAGGTTCCCGAAAGTGAGATCCGTGGAGCTGAAGGGGAAGCCTCACTTCGCAGACTTTAATTTGGTGCCTGAAGGATGGGGAGGCTACGTGTACCCATGGATAGAGGCCATGTCATCGTCGTACACGTGGCTGGAAGAGATAAGGCTGAAGAGGATGGTGGTGAGCGACGAGTGCTTAGAGCTCATAGCCAAGTCGTTTAAGAATTTTAAGGTTCTTGTGCTTTCTTCCTGTGAAGGCTTCTCCACCGATGGTCTCGCTGCTATCGCTTCCACTTGCAGGAATCTTAAAGAGCTTGATTTGCGCGAGAGTGATGTTGATGATGTTAGTGGCCACTGGCTTAGCCATTTCCCGGATACATATAC??????????????????????????????????????????????????????????????????????????????????????????????????????????????????TCCTCTTGAGAAACTGGCTACTTTACTCCAAAGAGCTCCTCAGTTAGAGGAATTGGGCACTGGTGGGTACACTGCTGAATTGCGACCAGATGTTTACTCTGCTTTATCTGTTGCGCTTTCTGGCTGCAAGGACTTGAAGTGCTTATCTGGATTTTGGGATGCTGTTCCTGCCTATCTTCCAGCTGTTTATTCTCTTTGCAGTCGCCTCACTACTTTGAATTTGAGTTATGCAACTGTCCAGAGCTATGATCTTGTCAAGCTTCTTAGCCAATGTCCAAAACTGCAGCGCCTCTGGGTGCTTGACTACATCGAGGATGCTGGTCTGGAGGTGCTTGCTTCAACCTGCAAGGACTTACGCGAGTTAAGAGTGTTTCCGTCTGAGCCTTTT---GTCATGGAACCAAACGTGGCATTAACGGAACAGGGGCTTGTCTCCGTCTCCATGGGCTGTCCAAAACTCGAGTCAGTTCTCTACTTTTGCCGTCAAATGACCAATGCTGCATTGATAACCATTGCTAGGAACCGTCCCAACATGACTCGCTTCCGTTTGTGCATCATTGAGCCGAAAGCCCCCGACTATCTGACTTTAGAGCCACTGGATGTTGGATTTGGAGCCATAGTAGAGCATTGCAAAGATCTCCGTCGCCTCTCTCTATCAGGCCTCTTGACAGACAAGGTTTTTGAATACATTGGGACATATGCCAAGAAGATGGAAATGCTCTCGGTGGCATTTGCAGGAGACAGTGACTTGGGCATGCATCATGTTTTGTCAGGGTGCGATAGCCTGAGGAAACTAGAGATAAGGGACTGCCCGTTTGGAGACAAGGCGCTTTTGGCCAATGCTTCAAAGCTGGAGACAATGCGATCCCTTTGGATGTCTTCTTGTTCCGTGAGTTTTGGAGCCTGCAAGTTACTAGGACAGAAGATGCCAAAGCTCAATGTGGAAGTCATCGATGAACGGGGTCCACCAGACTCAAGACCCGAGAGCTGCCCTGTGGAGAGAGTGTTTATATACAGAACAGTGGCAGGTCCTCGGTTTGACATGCCTGGCTTCGTCTGGAACATGA-CCAA---GACTCAACAATGAGGTTTTCCAGGGAAATCATCACGACTAACGGA------------TTATAA
	Capsella_rubella_0005s2963                          ATGCAG---AAGCGATTAGCCCTGTCGTTCCCGGAGGAGGTGCTCGAGCATGTGTTTTCGTTTATACACCTGGATAAGGATAGGAACTCGGTGTCTCTCGTTTGCAAGTCATGGTACGAGATCGAGCGGTGGTGCCGGAGGAAAGTCTTCATCGGGAACTGCTACGCCGTCAGTCCAGCGACGGTGATTCGGAGGTTCCCGAAAGTGAGATCCGTTGAGCTCAAGGGGAAACCTCACTTCGCTGACTTTAATTTGGTGCCTGAGGGATGGGGAGCTTACGTGTATCCATGGATTGAGGCCATGTCTTCGTCGTACACGTGGCTTGAGGAGATAAGGCTGAAGAGGATGGTGGTCAGCGACGACTGCTTGGAGCTCATAGCCAAGTCCTTTAAGAATTTTAAGGTTCTTGTTCTTTCTTCCTGTGAAGGCTTCTCCACCGATGGTCTCGCTGCTATCGCTGCCACTTGCAGGAATCTTAAAGAGCTTGATTTACGCGAGAGTGATGTCGATGATGTTAGTGGCCACTGGCTTAGCCATTTCCCTGATACATATACATCTTTAGTATCGCTCAATATCTCCTGCTTAGCATCTGAGGTCAGTTTCTCTGCTCTGGAAAGGCTGGTCACTAGGTGTCCCAATCTCAAGTCCCTCAAGCTTAACCGAGCTGTTCCTCTTGAAAAATTGGCTACTCTACTACATAGAGCACCTCAATTAGAGGAATTGGGGACCGGTGGCTACACTGCAGAAGTGCGACCAGATGTTTACTCTGGTTTATCTGTAGCGCTCTCTGGCTGCAAGAACTTGAAGTGCTTATCTGGTTTTTGGGATGCTGTTCCTGCCTATCTCCCAGCTGTTTATTCTGTTTGCAGTCGGCTCACAACTTTGAATCTCAGTTATGCAACAGTCCAGAGCTATGATCTTGTCAAGCTTCTTAGCCAATGTCCAAAACTGCAGCGCCTCTGGGTGCTTGACTACATCGAGGATGTTGGTCTGGAGGTGCTTGCTTCAACCTGCAAGGACCTACGCGAGTTGAGAGTGTTTCCATCCGAGCCTTTT---GTCATGGAACCAAACGTGGCATTAACGGAACAGGGGCTCGTCTACGTCTCCATGGGCTGTCCAAAACTCGAGTCAGTTCTCTACTTTTGCCGTCAAATGACCAATGCTGCATTGGTAACCATTGCTAGGAACCGTCCCAACATGACTCGCTTCCGTTTGTGCATCATTGAGCCAAAAGCCCCCGACTATCTGACTTTAGAGCCACTGGATGTTGGATTTGGAGCCATAGTAGAGCACTGCAAAGATCTCCGCCGCCTCTCTCTATCAGGTCTCTTAACAGACAAGGTTTTTGAATACATTGGGACATATGCCAAGAAGATGGAAATGCTCTCGGTGGCTTTTGCAGGAGACAGTGATTTGGGCATGCATCATGTTTTGTCAGGGTGTGATAGCTTGAGGAAACTAGAGATAAGGGACTGCCCGTTTGGAGACAAGGCGCTTTTGGCCAATGCTTCAAAGCTGGAGACAATGCGATCCCTTTGGATGTCTTCTTGTTCCGTGAGTTTTGGAGCCTGCAAGTTACTAGGACAGAAGATGCCAAAGCTCAATGTGGAAGTCATCGATGAACGGGGTTCACCAGACTCAAGACCCGAGAGCTGCCCTGTTGAGAGAGTGTTTATATACCGAACAGTGGCTGGTCCTCGGTTTGACATGCCTGGCTTCGTCTGGAACATGGACCAA---GACTCAACAATGAGGTTTTCCAGGGAAATCATCACAACTAACGGA------------TTATAA
	Leavenworthia_alabamica_KE159252_38K                ATGCAG---AAGAGATTGGGTTTAACGTTTCCAGAAGAAGTATTGGAGCATGTATTCTCGTTTATAAATAAGGATAAGGATAGGAACTCAGTGTCTCTGGTGTGTAAGTCATGGTACGAGATAGAGCGGTGGTGTAGGAGGAAAGTGTTCATAGGAAACTGTTATGCGGTGAGCCCAGCGACGGTGATAAGAAGGTTTCCGAAGTTGAGATCGGTGGAGTTGAAAGGAAAACCTCACTTCGCTGACTTTAATTTGGTGCCAGATGGATGGGGAGGAAACGTATATCCATGGATAGAGGCGATGTCAGTATCGTATACATGGCTAGAGGAGATAAAGCTGAAGAGGATGGTGGTGACGGACGAATGCTTAGAGCTAATAGCAAAGTCGTTTAAGAGTTTTAAAGTTCTGGTGCTTTCGTCATGTGAAGGATTCTCCACCGATGGTCTAGCTGCTATCGCTGCTACTTGCAGGAATCTGGAAGTGCTTGATTTGCGCGAGAGTGATGTTGACGATGTTAGTGGCCACTGGCTTACTCATTTCCCTGATACTTACACATCTTTGGTATCACTCAATATCTCTTCCTTGACTTCTGAGCTCTGTTTCTCTGCTCTCGAAAGGTTGGTCACTAGGTGTCCTAATCTCAAGTCTCTCAAGCTTAATCGGGCTGTTCCTCTTGAAAAATTGGCTACTTTAATTCAAAGAGCACCTCAATTGGAGGATTTCGGCACTGGTCTCTACACTGCTGATGTGCGTCCAGATGTTTTCTCTGCCCTATCTCTAGCCTTCTCTGGGTGCAAGGGTCTGAAGTGCTTATCTGGACTTTGGGATGCTGTTCCTTTCTATCTTCCAGCTGTTTATTCGGTTTGCAGTCGGCTTACAACTTTAAACCTTAGTTATGCTACAGTCCAGAGTTATGATCTTGTCAAGCTTATTAGTCAATGCCCTAAACTTCAGCGCCTCTGGGTGCTGGACTACATCGAGGATACTGGTCTCGAAGTGCTTGCTTCAACCTGCAAAGACCTACGTGAGCTAAGAGTGTTCCCGTCCGAGCCTTTT---GTCATCGAACCAAACGTGGCATTGACAGAACAAGGACTTGTTTCTGTCTCCATGGGATGTCCAAAACTCGAGTCAGTTCTCTACTTCTGCCGTCAAATGACCAATGATGCATTGATAACCATTGCTAGGAACCGTCCTAACCTGACTCGCTTTCGTTTGTGCATCATTGAGCCAAAAGCTCCTGACTATCTGACTCTGGAGCCCCTGGATGTTGGATTTGGAGCCATAGTAGAGCACTGTAAAGATCTGCGTCGCCTCTCTCTATCAGGCCTCTTGACCGACAAGGTTTTTAAATACATTGGGAGATACGCCAAGAAGATGGAAATGCTGTCAGTGGCATTTGCAGGAGACAGTGACGTAGGCATGGATCATGTATTGTCAGGGTGCAATAGCTTGAGGAAACTAGAGATAAGGGACTGCCCGTTTGGAGACAAGGCGCTTTTGGCCAATGCATTAAAGCTGGAGACAATGCGATCCCTTTGGATGTCTTCTTGCTCGGTTAGTTTTGGAGCCTGCAAGTTATTAGGACAGAAGATGCCAGAGCTGAATGTGGAAGTGATCGATGAAAGGGGTCCACCAGACTCGAGACCTGAGAGTTGCCCTGTGGAGAGAGTGTTCATATACAGAACAGTGGCGGGTCCTCGGATGGACATGCCTGGCTTTGTCTGGAACATGGACCAA---GATTCAACCATGAAGTTTTCCAGGCAAATCATCACTACTAACGGATTAAAAGACAAAATATAA
	Leavenworthia_alabamica_KE158845_356K               ATGCAG---AAGCGTTTAGCCATATCGTTTCCAGAAGAAGTGTTGGAGCATGTGTTTTCATTTATAAAAAAGGATAAGGATAGGAACGCAGTATCTCTGGTGTGTAAGTCATGGTACGAGATAGAGCGGTGGTGTAGGAGAAAAGTGTTCATCGGGAACTGTTACGCAGAGAGGCCAGAGAGGGTGATAGGGAGGTTCCCAAAGTTGAGATCGGTAGAGTTGAAAGGAAAACCACACTTTGCTGACTTTAATTTGGTACCAGAGGGATGGGGAGGAGATGTGTATCCATGGATAGAGGCGATGGCGTCATCATACACGTGGCTTGAAGAGATAAGGCTGAAGAGGATGGTGGTGACTGACGAATGCTTAGAGCTGATAGCAAAGTCTTTTAAGAGTTTTAAGGTTTTGGTGCTTTCTTCTTGTGAAGGATTCTCCACCGATGGTCTCGCTGCTATCGCTGCCAGTTGCAGGAATCTGAAAGAGCTTGATTTGCGCGAGAGTGATGTTGAAGATGTTAGTGGCCATTGGCTTAGCCATTTCCCTGATACTTACACATCTTTGGTATCACTCAATATCTCTTGCTTATCTTCTGAAGTCAGTTTCTCTGCTCTGGAGAGGCTTGTCAGTAGGTCCCCTAATCTCAAGTCTCTCAAGCTTAACCGGGCTGTTCCTCTTGAAAAATTGGCTGCTTTACTTGAAAGAGCACCTCAATTGGAGGAATTGGGCACTGGTGCCTACACTGCTGAAGTGCGACCTGATGTTTTCTCTGCCTTATCTGTTGCCCTCTCTGGGTGCAAGTGCTTGAATCGCTTATCTGGGTTTTGGGATGCTGTCCCTGCCTATCTTCCTGCTGTTTATTCGGCCTGCACTCGGCTGACAACTTTGAACCTTAGTTATGCAACAGTTCTGAGCTATGATCTTGTCAAGCTACTTAGCCAATGCCCTAAACTGCAGCGTCTCTGGGTGTTAGACTACATCGAGGATACTGGTCTTGAGGTACTTGCTTCAACCTGCAAGGACCTACGCGAGCTAAGAGTGTTCCCATCTGAGCCTTTT---GTTATGGAACCAAACGTGGCATTGACTGAACAAGGACTTGTTTCTGTCTCCATCGGCTGTCCAAAACTCGAGTCAGTTCTCTACTTCTGTCGTCAAATGACCAATGCTGCATTGATAACCATCGCTAGGAACTGTCCCAACATGACTCGCTTCCGTTTGTGCATCATTGAGCCAAAAGCCCCTGACTATCTGACTCTTGAGCCGCTGGATGTTGGATTTGGAGCCATAGTAGAGCACTGCAAAGATTTGCGTCGTCTGTCTCTATCAGGCCTCTTGACCGACAAGGTTTTTGAATACATTGGGACATTTGCCAAGAAGATGGAAATGCTATCAGTGGCATTTGCCGGAGACAGTGACTTGGGCATGCATCATGTTTTGTCAGGGTGCGATAGCTTAAGGAAACTAGAGATAAGGGACTGCCCATTTGGAGACAAGGCGCTTTTGGCGAATGCTTCAAAGCTGGAGACAATGCGATCCCTTTGGATGTCTTCTTGCTCGGTGAGTTTTGGAGCCTGCAAGTTATTAGGACAAAAGATGCCAAAGCTCAATGTGGAAGTCATCGATGAACGGGGTCCACCAGACACAAGACCCGAGAGCTGCCCCGTTGAGAGAGTGTTCATATACAGAACAGTCGCTGGTCCTCGGTTTGACATGCCTGGCTTCGTCTGGAACATGAACCAA---CACTCAACCACAAGGTTTTCCAGTCAAATCATCAATACTAATGGA------------TTATAA
	Brassica_rapa_D00040                                ATGTAT---AAGCGAGTGTCGTTATCGTTTCCAGAAGAAGTCCTCGAGCACGTATTCTCGTTTATACACGTGGACAAGGACAGGAACTCGGTGTCCCTGGTGTGCAAGTCGTGGTACGAGATCGAGCGGTGGTGCAGGAGGAAAGTCTTCGTCGGGAACTGCTACGCGGTGAGCCCCGGGACGGTGATAAGGAGGTTCCCGAAGCTGAGATCCGTGGAGCTGAAGGGGAAGCCGCACTTCGCGGACTTCAATTTGGTGCCGGAGGGGTGGGGAGGGTACGTGTACCCGTGGATAGAGGCGATGTCGACGTCGTACACGTGGCTGGAGGAGATAAGGCTGAAGAGGATGGTGGTGAGCGACGAGTGCTTGGAGCTCATCGCTAAGTCCTTTAAGAATTTTAAGGTTCTCGTGCTTTCTTCCTGCGAAGGCTTCTCCACCGATGGCCTCGCTGCTATCGCCGCCTCTTGCAGGAATCTGAGAGAGCTTGATTTGCGTGAGAGTGATGTTGACGATGTTAGCGGCCACTGGCTTAGCCATTTCCCAGACACATACACTTCTTTGGTATCGCTCAATATCTCTTGCTTATCCTCTGAGCTCAGTTTCTCTGCTCTCGAAAGGCTGGTGACTAGGTGTCCCTCTCTCAAGTCTCTCAAGCTTAACCGAGCTGTTCCTCTCGAGAAACTGGCTATTTTACTTCAAAGAGCGCCTCAGCTTGAGGAATTTGGCACCGGTGGCTACACTGCTGATGTGCGTCCAGATGTGTTCTCTGATTTGTCTGTGGCTCTCTCTGGCTGCAAGAAGTTGAAGTGCTTATCTGGGTTTTGGGATGCTGCTCCTGCCTATCTTCCAGCTGTTTATTCCGTTTGCTGTCGGGTTACTACTTTGAACCTGAGTTATGCGACGGTTCAGAGTTATGATCTTGTCAAGCTTCTTAGCCAATGTCCTAAATTGCAGCGTCTCTGGGTGTTGGATTACATCGAGGATACTGGTCTTGAAGTGCTTGCTTCAACCTGCAAGGACCTCCGCGAGCTGAGAGTGTTTCCGTCTGACCCTTTT---GTCATGGAGGCAAACGTTGCATTGACGGAACAAGGGCTTGTCTCGGTCTCTATGGGCTGTCCAAAACTCGAGTCGGTTCTCTACTTCTGCCGTCAAATGACCAATGATGCGTTGGTAACCATTGCTAGGAACCGTCCCAACATGACCCGCTTCCGTTTGTGCATCATCGAGCCGAAAGCCCCCGACCATATGACTCTAGAGCCACTGGATGTGGGATTTGGAGCCATAGTAGAGCACTGCAAAGATCTCCGGCGGCTCTCCCTATCGGGGTTGTTGACCGACAAGGTTTTCGAATACATTGGGACATATGCAAAGAAGATGGAGATGCTGTCAGTGGCGTTTGCAGGAGAGAGTGACTTGGGGATGCATCATGTGTTGTCAGGGTGCGATAGTTTGAGGAAGCTAGAGATAAGGGACTGCCCGTTTGGAGACAAGGCGCTATTGGCCAATGCTTCGAAGCTGGAGACAATGCGATCTCTTTGGATGTCTTCTTGCTCGGTGAGTTTTGGAGCCTGCAAGTTATTAGGACAGAAGATGCCAAAGCTCAATGTGGAAGTCATCGATGAAAGGGGTCCGCCGGACTCGAGACCGGAGAGCTGCCCTGTTGAGAGAGTGTTCATATACCGAACAGTGGCGGGTCCTCGGTTTGACATGCCTGGCTTCGTCTGGAACATGGACCAACAACACTCAACCATGAGGGTTTGC---CAGGGA---------AATGGT---------CACTACTAA
	Brassica_rapa_I04357                                ATGTAT---AAGCGAGTGGCCTTATCGTTCCCCGAGGAAGTCCTCGAGCACGTGTTCTCCTTCATCCACGTGGACAAGGACAGGAACTCTGTGTCCCTTGTCTGCAAGTCGTGGTACGAGATCGAGCGGTGGTGCAGGAGGAGAGTCTTCATCGGGAACTGCTACGCCGTGAGCCCCGCGGCGGTGATACGGAGGTTCCCTAAAGCGAGATCCGTGGAGCTGAAGGGGAAGCCGCACTTCGCGGACTTCAATCTGGTGCCCGAGGGGTGGGGAGGGTACGTGTACCCGTGGATAGAGGCGATGTCGGCGTCGTACACGTGGCTGGAGGAGATAAGGCTGAAGAGGATGGTGGTGAGCGACGAGTGCTTGGAGCTTATAGCCAAGTCGTTTAAGAATTTTAAAGTGCTCGTGCTTTCCTCGTGCGATGGATTCTCCACGGATGGGCTCGCTGCTATCGCTTCGAGCTGCAGGAATCTGAAAGAGCTTGATTTGCGTGAGAGTGATGTTGACGACGTTAGCGGACACTGGCTTAGCCATTTCCCTGATACATACACTTCTTTGGTTTCGCTCAATATCTCATGCTTAGTCTCCGAGGTCAGTTTCTCTGCTCTGGAGCGGCTGGTGTGTAGGTCTCCCAACCTCAAATCACTGAAGCTTAACCGAGCTGTTCCTCTTGAGAAGTTGGCTGCTTTACTTCAAAGAGCTCCTCAGCTGGAGGAATTTGGCACTGGTGTGTACAGTGCTGAAGTGCGTCCGGATGTGCTCTCTGGTTTGTCTGTAGCTATCTCTGGGTGCAAGAAATTGAAGTGGTTATCTGGGTTTTGGGATGCTCTTCCTGCGTATCTTCCTGCAGTTTATTCGGTTTGCAGTGGACTTACAACTTTGAACTTGAGTTATGCAACAGTCCAGAGCTATGATCTTGTCAAGCTTCTTAGTCAATGTCCTAAATTGCAGCGCCTCTGGGTGTTGGACTACATCGAGGATGATGGTCTTGAAATGCTTGCTTTGACCTGCAAGGACCTTCGAGAGCTAAGGGTGTTTCCGTCCGAGCCTTTT---GTGATGGAGCCAAACGTAGCGTTGACAGAACAAGGGCTTGTCTCCGTCTCCGCAGGCTGTCCAAAACTCGAGTCGGTTCTCTACTTCTGCCGTCAAATGACCAATGCTGCGCTGGTAACCATTGCTAGGAACCGTCCCAACATGACCCGCTTCCGTTTGTGCATCATTGAGCCGAAAGCCCCTGACCATCTGACTCTAGAGCCACTGGATGTGGGATTCGGAGCCATAGTGGAGCACTGCAAAGATCTCCGGCGGCTCTCCCTGTCAGGGCTGTTGACCGACAAGGTCTTCGAATACATTGGGACGTATGCAAAGAAGATGGAAATGCTGTCAGTGGCGTTTGCAGGAGACAGTGACTTGGGGATGCATCATGTTCTGTCAGGGTGCGAGAGCTTGAGGAAGCTAGAGATAAGGGACTGCCCCTTTGGAGACAAGGCGCTTTTGGCAAATGCTTCGAAGCTGGAGACAATGCGATCTCTTTGGATGTCTTCGTGTTCCGTGAGTTTTGGAGCCTGCAAGTTATTAGGACAGAAGATGCCAAAGCTCAATGTGGAAGTGATCGATGAAAGGGGTCCGCCTGACTCTAGACCCGAGAGCTGCCCTGTTGAAAGAGTGTTCATATACCGAACAGTGGCTGGTCCTCGGTTTGACATGCCTGGTTTCGTCTGGAACATGGATCAACAACACTCAGCAATGAGGTTTTCCAGGCAAATCATTACTACTAACGGG------------TTATAG
	Brassica_rapa_G01991                                ATGCAG---AAGAGAATCGGCCTCTCGTTTCCCGAAGAAGTTCTGGAGCACGTGTTCTCCTTTATCCACCACGACAAGGATAGGAACTCCGTTTCCCTCGTCTGCAAGTCGTGGTACGAGATCGAGCGGTGGTGCAGGAGGAGAGTCTTCATCGGGAACTGCTACGCCGTGAGCCCCGCGACGGTGATAAGGAGGTTCCCGAAAGTGAGATCCGTGGAGCTGAAAGGGAAACCGCACTTCGCTGACTTCAATTTGGTGCCGGAGGGATGGGGAGGGTACGTGTATCCGTGGATTGAGGCGATGTCGAAGGCGTACACGTGGCTGGAGGAGATTAGGCTGAAGAGGATGGTGGTGAGTGATGAGTGCTTGGAGCTTATAGCTAAGTCGTTTAAGAATTTTAAAGTTCTGGTGCTTTCTTCCTGCGATGGCTTCTCCACCGATGGCCTCGCTGCTATCGCCTCCACTTGCAGGAATCTGAAAGAGCTTGATTTGCGTGAGAGTGATGTTGACGACGTTAGCGGACACTGGCTAAGCCATTTCCCTGATACATACACTTCCCTGGTATCACTCAACATCTCTTGCTTAGCCTCCGATGTATGTTTCTCTGCTCTGGAGAGGCTGGTGAGTAGGTGTCCCAATCTCAAGTCTCTCAAGCTTAACAGAGCCGTTCCTCTTGAAAAATTGGCTACTTTGCTTCGAAGAGCGCCTCAGCTGGAGGAATTGGGCACCGGTGGCTACACTGCTGATGTGCGTTCAGATTTGTTCTCTGATTTATGCGTAGCTCTCTCTGGTTGCAAGAAGTTGAAGTGCTTATCTGGCCTTTGGGATGCTGCTCCTGCCTATCTTCCAGCTGTTTATTCTGTTTGCGGCCGGCTTACAACTTTGAACCTGAGTTATGCAACTGTCCAGAGCTATGATCTTGTCAAGCTTATTACTTTATGTCCTAAACTGCAACGCCTCTGGGTGCTGGACTACATCGAGGATACTGGTCTTGAGGTGCTTGCTTCAACCTGCAAGGACCTTAGAGAGCTGAGAGTGTTTCCGTCTGAGCCTTTT---GTCATGGAGCCAAACGTCTCATTGACGGAACAAGGGCTTGTCTCTGTCTCCGCGGGCTGTCTAAAACTCGAGTCTGTTCTCTACTTTTGCCGCCAAATGACCAATGATGCGTTGGTAACCATTGCTAGGAACCGTCCCAACATGACTCGCTTCCGTTTGTGCATCATTGAGCCGAAAGCCCCTGACCATCTAACACTAGAGCCACTGGATGTGGGTTTCGGAGCCATTGTAGAGCACTGCAAAGATCTCCGGCGTCTCTCCTTATCAGGGCTCCTGACCGACAAGGTTTTCGAATACATTGGGAAGTATGCAAAGAAGATGGAGATGCTCTCGGTGGCGTTTGCAGGAGACAGCGACTTGGGGATGCATCATGTTTTGTCAGGGTGCGATAGCCTGAGGAAGCTAGAGATAAGGGACTGCCCGTTTGGAGACAAGGCGTTATTGGCAAATGCTTCGAAGCTGGAGACAATGCGATCTCTTTGGATGTCTTCTTGTTCCGTGAGTTTTGGAGCCTGTAAGTTATTAGGACAGAAGATGCCAAAGCTCAATGTGGAAGTCATTGATGAGCGGGGTCCACCTGACTCGAGACCTGAGAGCTGCCCTGTTGAGAGAGTGTTTATATACCGAACAGTAGCGGGTCCTCGGTTTGACATGCCTGACTTCGTCTGGAACATGGACCAA---CAGTCATCAATGAGTGTTTCCAGGCAAATCATCACTACTAATGTG------------TTATGA
	Eutrema_salsugineum_10005852m                       ATGCAT---AAGCGATTGGCCTTGTCGTTTCCAGAAGAAGTACTGGAGCACGTATTCTCGTTTATACAGCAGGACAAGGATAGGAACTCGGTGTCTCTGGTGTGCAAGTCATGGTACGAGATCGAGCGGTGGTGCAGGAGGAAAGTGTTCATCGGGAACTGTTACGCGGTGAGCCCGGCGACGGTGATCAGGAGGTTCCCGAAAGTGAGATCCGTGGAGCTCAAGGGCAAACCTCACTTCGCCGACTTCAATTTGGTGCCTGATGGATGGGGAGGCTACGTGTATCCTTGGATTGAGGCCATGTCTTCGTCGTACGCGTGGCTGGAGGAGATAAGGCTGAAGCGGATGGTGGTGAGCGACGAGTGCTTGGAGCTCATAGCTAAGTCCTTTAAGAATTTCAAGGTTCTCGTGCTTTCTTCCTGCGATGGCTTCTCCACTGATGGCCTCGCTGCTATCGCTTCCACTTGCAGAAATCTGAAAGAGCTTGATCTGCGTGAGAGTGATGTTGATGATGTTAGCGGACACTGGCTTAGTCATTTCCCAGATACATACACATCTTTGGTATCACTCAATATCTCTTGCTTAACCTCTGAGGTCAGTTTCTCTGCGCTGGAAAGGTTGGTGAGTAGGTGTCCCAGTCTCAAGTCTCTCAAGCTTAACCGAGCTGTTCCTCTTGAAAAGTTGGCTACTTTACTTCAAAGAGCACCTCAATTGGAAGAATTGGGCACCGGTGGTTACACTGCTGAAGTCCGTCCAGATGTCTTCTCTGGTTTATCACTAGCTCTCTCTGGCTGCAAGAAGCTCAATTGCTTATCTGGCTTTTGGGATGCCGTTCCTGCCTATCTACCAGCCGTTTATTCGCTTTGCAGCCGCCTCACAACTCTGAACCTGAGTTATGCGACTGTCCAGAGCTATGATCTTGTCAAGCTTCTTAGTCAATGCCCTAAATTGCAGCGCCTCTGGGTGCTGGACTACATTGAGGATGCTGGTCTTGAGGTGCTTGCTTCAACCTGCAAGGACCTTCGCGAGTTGAGAGTGTTTCCGTCTGAGCCTTTT---GTCATGGAGCCAAACGTTGCATTGACAGAACAAGGGCTTGTCTCCGTCTCCGTAGGCTGTCCAAAACTTGAGTCGGTTCTCTACTTCTGCCGTCAAATGACCAATGCTGCGTTGGTGACCATTGCTAGGAACCGTCCGAACATGACTCGGTTCCGTTTGTGCATCATTGAGCCAAAAGCCCCCGATTATCTGACTCTAGAGCCACTGGATGTGGGATTTGGAGCCATAGTAGAGCACTGCAAAGATCTCCGGCGCCTCTCCCTATCGGGGCTGTTGACGGACAAGGTTTTCGAATACATTGGGACATATGCCAAGAAGATGGAAATGCTCTCGGTGGCGTTTGCAGGAGACAGTGACTTAGGCATGCATCATGTTTTGTCGGGGTGCGATAGCTTGAGGAAACTAGAGATAAGGGACTGCCCATTTGGAGACAAGGCGCTTTTGGCCAATGCTTCAAAGCTGGAGACAATGCGATCCCTTTGGATGTCTTCTTGTTCCGTGAGTTTTGGAGCCTGCAAGTTGCTAGGACAGAAGATGCCAAAGCTCAATGTGGAAGTCATTGATGAACGGGGTCCACCTGACTCGAGACCCGAGAGCTGCCCTGTTGAGAGAGTGTTCATATACCGATCCGTGGCTGGTCCTCGGTTTGACATGCCTGGCTTCGTCTGGAACATGGACCAA---CACTCAACCATGAGGTTTTCCAGGCAAATCATCACTACTAACGGA------------TTATAA
	Arabis_alpina_Aa_G163540                            ATGCAT---AAACGATTAGCGTTATCGTTTCCAGAAGAAGTTCTAGAGCATGTATTCTCGTTTATACATATGGATAAAGATAGAAACTCTGTATCTCTCGTGTGTAAATCATGGTACGAGATCGAGCGTTGGTGTAGGAAGAAAATCTTTATCGGAAACTGTTACGCGGTGAGTCCATCGACGGTGATCCAAAGGTTTCCTAAACTGAGATCTGTAGAGATTAAAGGAAAACCTCACTTCGCTGACTTCAATTTAGTACCTGATGGTTGGGGTGGTTACGTTTATCCATGGATTGAAGCTATGGCGTTATCGTATACTTGGCTTGAAGAGATTAGATTGAAGAGAATGGTTGTTACTGATGATTGTTTAGAGCTTATTGCTAAATCGTTTAAGAATTTCAAAGTTCTTGTGCTTTCTTCTTGTGAAGGTTTCTCTACTGATGGTCTTGCTGCTATTGCTGCTAGTTGCAGGATGTTGAAAGAGCTTGATTTACGGGAAAGTGATGTTGATGATGTTAGTGGTCACTGGCTTAGCCATTTCCCGGATTCATACACTTCTTTGGTATCACTGAATATCTCATGCTTAGTGTCTGAAGTCAGTTTTGCGGCTTTGGAGAGGTTGGTCAGTAGGTGTACTAATCTTAAGTCTTTGAAGCTTAACCGAGCTGTTCCTCTTGAAAAATTGGCAACTTTACTTCAAAGAGCACCTCAGTTGGAGGAATTGGGTACTGGTGGGTACACTGCTGAAGTACGTCCGGACGTGTTCTCTGGTTTATCTGTAGCTCTCTCTGGTTGCAAGGAGTTGAAGTGTTTATCTGGGTTTTGGGATGCTGTTCCTGCGTATCTACCAGCAGTTTATTCGCTTTGTAGTCGGCTTACGACTTTGAACCTGAGCTATGCAACAGTCCAGAGCTATGATCTTGTTAAGCTTCTTAGTCAATGTCCCAAATTGCAGCGCCTCTGGGTTCTGGACTACATCGAGGATGCTGGTCTTGAGGTGGTTGCTTCAACCTGCAAGGACCTACGCGAGCTTAGAGTGTTTCCATCTGAGCCTTTT---GTGATGGAAGCAAATGTGCCATTGACGGAACAAGGGCTTGTCTCTGTTTCCTTGGGATGTCCAAAACTCGAGTCTGTTCTCTACTTCTGCCGTCAAATGACCAATGCTGCGTTGGTAACCATTGCTAGGAACCGTCCCAACATGATTCGCTTCCGTTTGTGCATCATTGAGCCAAAAGCCCCTGACTATCTGACTCTAGAGCCGCTGGATGTTGGATTTGGAGCCATAGTAGAGCACTGCAAGGATCTCCGCCGGCTCTCTCTATCAGGCCTCTTAACGGACAAGGTTTTCGAATACATTGGGACATATGCCAAGAAGATGGAAATGCTCTCAGTGGCGTTTGCAGGAGACAGTGACTTAGCCATGCATCATGTATTGTCCGGGTGCGATAGCTTGAGGAAACTAGAGATAAGGGACTGCCCGTTTGGAGACAAGGCGCTTTTGGCCAACGCTTCAAAGCTGGAGACAATGCGATCCCTTTGGATGTCTTCTTGTTCCGTGAGTTTTGGAGCCTGCAAGTTACTAGGACAGAAGATGCCAAAGCTCAATGTGGAAGTCATCGATGAACGGGGTCCTCCCAACTCAAGACCCGAGAGCTGCCCGGTTGAGAGAGTGTTCATATACCGAACAGTGGCTGGTCCTAGGTTTGACATGCCTGGCTTCGTCTGGAACATGGACCAA---GACTCAACCATGAGGCTATCCAGGCAAATGATCACCACTAACGGA------------TTGTAA
    Thlaspi_arvense_Ta09076                             ATGCAT---AAGCGAGTGGCCTTGTCGTTCCCAGAAGAAGTGCTGGAGCACGTGTTCTCGTTTATACACGTGGACAAGGATAGGAACTCGGTGTCCCTGGTGTGCAAGTCATGGTACGAGATCGAGCGGTGGTGCAGGAGGAAAGTCTTCATTGGGAACTGTTACGCCGTGAGCCCAGCGACGGTGATCCGGAGGTTCCCGAAAGTGAGATCCGTGGAGCTGAAGGGGAAGCCTCACTTCGCTGACTTTAATTTGGTGCCCGATGGATGGGGAGGTTACGTGTACCCTTGGATTGAGGCGATGTCGTCGTCCTACACGTGGCTTGAGGAGATAAGGCTGAAGCGGATGGTGGTGAGCGACGAGTGCTTGGAGCTCATCGCCAAGTCGTTTAAGAATTTCAAGGTTCTCGTGCTTTCTTCCTGCGATGGCTTCTCCACCGATGGCCTCGCTGCCATCGCTGCCAGTTGCAGGAATCTGAAAGAGCTTGATTTGCGTGAGAGTGATGTTGACGATGTAAGCGGGCACTGGCTTAGCCATTTCCCAGATACGTACACATCTTTGGTTTCACTCAACATCTCATGCTTAGCCTCCGAGGTCAGTTTCTCTGCGCTGGAAAGGCTGGTGAGTAGGTGTCCCAATCTCAAGTCTCTGAAGCTTAACCGAGCTGTTCCTCTTGAAAAGTTGGCCACTTTACTTCAACGAGCACCTCAATTGGAGGAATTAGGCACCGGCGGGTACACTGCTGAAGTGAGGCCAGATGTGTTCTCTGCTTTATCTGTGGCTCTCTCTGGGTGCAAGAAGTTGAAGTGTTTATCTGGGTTTTGGGATGCTGCTCCTGCCTATCTTCCAGCAGTTTATTCTGCTTGCAGTCGGCTTACAACTTTGAACCTGAGCTATGCGACAGTCCAGAGCTATGATCTTGTCAAGCTTCTTAGTCAGTGTCCTAAATTGCAGCGCCTGTGGGTGCTGGACTATATCGAGGATGCTGGTCTTGAGGTACTTGCTTCAACCTGTAAGGACCTTCGCGAGCTCAGAGTGTTTCCGTCTGAGCCTTTC---GTCATGGAGGCAAACGTTGGACTGACAGAACAAGGGCTTGTCTCCGTCTCCATTGGCTGTCCGAAACTTGAGTCGGTTCTGTACTTCTGCCGTCAAATGACAAATGCTGCGTTGGTAACCATTGCTAGGAACCGTCCCAACATGACTCGCTTCAGGTTGTGCATCATAGAGCCCAAAGCGCCAGACTATCTGACTCTAGAGCCGCTGGATGTGGGGTTTGGAGCCATAGTGGAGCACTGCAAAGAGCTCCGGCGGCTCTCCCTATCAGGGCTATTGACGGACAAGGTTTTCGAGTACATTGGGACATATGCAAAGAAGATGGAAATGCTGTCAGTGGCGTTTGCGGGAGACAGTGACTTGGGGATGCATCATGTGTTGTCGGGGTGCGAAAGCCTGAGGAAACTAGAGATAAGGGACTGCCCGTTTGGAGACAAGGCGCTGTTGGCGAATGCTTCAAAGCTGGAGACAATGCGATCCCTTTGGATGTCTTCTTGTTCCGTGAGTTTTGGAGCCTGCAAGTTGTTAGGACAGAAGATGCCAAAGCTAAATGTGGAAGTCATCGATGAAAGGGGTCCACCAGACTCGAGACCCGAGAGCTGCCCTGTTGAGAGAGTGTTCATATACAGAACAGTGGCTGGCCCTCGGTTTGACATGCCTGGCTTCGTCTGGAACATGGACCAA---CACTCGACCATGAGCTTTTCCAGGCAAATCATCACTACTAACGGG------------TTATAA
	Cochlearia_officinalis_CSUV2056054e                 ATGCAT---AAGAGATTGAATTTATCTTTCCCTGAAGAAGTTCTCGAGCACGTCTTCTCGTTTATACATCTAGACAAGGATCGAAACTCTGTGTCGCTTGTATGCAAGTCATGGTACGAGATCGAGCGGTGGTGTAGACGGAAAGTCTTTATCGGAAACTGTTACGCCGTAACACC????????????????????????????????????????????????????????????????????????????????????????????????????????????????????????????????????????????????????????????????????????????????????????????????????????????????????????????????????????????????????????AAGGTTTCTCTACTGATGGTCTCGCTGCTATAGCTGCTAGTTGCAGGAATCTGAAGGAGCTTGATTTGCGAGAGAGTGATGTTGATGATGTTAGTGGGCACTGGCTAAGCCATTTCCCTGATACTTACACGTCTTTGGTATCGCTTAATATCTCGTGTTTAGGCTCTGAGGTCAGTTTCTCTGCGCTGGAAAGGCTGGTGAGTAGGTGCCCCAATCTCAAGTCTTTGAAGCTTAACAGAGCTGTTCCTCTTGAAAAGTTGGCAACTTTGCTTCAAAAAGCTCCTCAGTTGGAGGAATTGGGCACTGGTGGGTATGTTGCTGATGTGAGACCAGATGTGTTCTCTGGTTTATCTGTTGCTTTCTCTGCGTGCAAGAAGTTGAAGTGTTTATCCGGGTTTTGGGATGCTGTTCCTGCCTATCTTCCTGCAGTTTATTCAGTTTGCAGTGGGCTTACTACTCTGAACCTGAGCTATGCAACAGTCCAGAGCTATGATCTTGTCAAGCTTCTTAGTCAATGCCCTAAATTGCAACGTCTCTGGGTGTTGGATTACATCGAAGATGCTGGTCTTGAGGTGCTTTCTTCAACCTGCAAGGACCTACGAGAGCTGAGAGTGTTTCCGTCTGAGCCTTTT---GTCATGGAACAAAACGTGGCATTGACAGAACAAGGGCTTGTCTCTGTATCCATGGGCTGTCCAAAGCTTGAGTCGGTTCTCTACTTTTGTCGTCAAATGACCAATGCTGCATTGGTAGCCATTGCTAGGAACCGTCCCAACATGACTCGCTTTCGTTTGTGCATCATTGAGCCAAAAGCCCCTGACTATCTCACTCTAGAGCCACTTGATATGGGTTTTGGAGCCATAGTAGAGCACTGCAAAGATCTACGTCGCCTCTCCTTATCAGGCCTCTTGACAGACAAAGTTTTCGAGTACATCGGGACATACGCCAAAAAGATGGAAATGCTCTCGGTGGCGTTTGCAGGAGACAGTGACTTAGGCATGCATCATGTTTTGTCAGGGTGCAATAGCCTGAGGAAACTAGAGATAAGGGACTGCCCGTTTGGAGACAAGGCGTTGTTGGCGAATGCGTCAAAGCTGGAGACAATGCGATCCCTTTGGATGTCTTCTTGTTCAGTGAGTTTTGGAGCCTGCAAGCTATTAGGACAGAAGATGTCAAAGCTCAACGTGGAAGTCATAGACGAAAGGGGTCCACCTGATTCGAGACCAGAGAGCTGTCCTGTTGAGAGAGTGTTCATATACCGAACAGTGGCTGGTCCTCGGTTCGACATGCCTGGCTTCGTGTGGAACATGGACAAA---CACTCAACAATGAGGTTTTCCAGACAAATAATCACCACTAACGGA------------TTATAA
    Aethionema_arabicum_TIR1A_LG10_9771300              ATGCAG---AAGAGACTTAGCTTGTCGTTTCCTGAAGAGGTACTCGAGCATGTTTTCTCGTTTATACAGTTGGATAAGGATAGGAACTCGGTTTCTCTAGTGTGTAAGTCGTGGTACGAGATCGAGCGTTGGTGTAGGAGAAAAGTCTTTATAGGGAACTGCTATGCGGTTGGACCAGCGACGATGATCAGGAGATTTCCGAAGTTGAGATCTGTGGAAATGAAGGGGAAACCACACTTCGCTGACTTTAATTTGGTGCCTGATGGTTGGGGAGGTTACGTGTATCCTTGGATTGAGGCGATGTCATCGTCGTACTCATGGCTTGAAGAAATAAAGCTGAAAAGGATGGTCGTGACGGATGAGTGTCTAAAGTTAATCGCCAAGTCCTTTAAGAATTTCAAGGTTCTTGTGCTTTCGTCCTGCGAGGGATTCTCCACTGATGGTCTCGCTGCTATCGCTGCTAGTTGCAGGAATCTGAGAGAGCTTGATTTGCGAGAGAGTGATGTAGACGATGTTAGTGGGCACTGGCTTAGCCATTTCCCAGATTCATACACATCTTTGGTATCACTCAACATTTCATGCTTAGGATCCGAGGTCAGTTTCTCTGCTTTGGAAAGGCTGGTAAGTAGGTGTCCCAGTCTCAAGTCTCTGAAGCTTAACCGGGCTGTTCCTCTTGAATCCTTGGCAACTTTACTTCAAAGAGCACCTCAATTGGAGGAATTAGGCACTGGTGGATACACTGCTGATGTTGGACCAGATATTTTCTCTAGTTTATTCGTAGCTTTCTCTGGGTGCAAGGAGTTGAAGTGCTTATCTGGGTTTTGGGATGCTGTGCCTGCGTATCTTCCTGCAGTTTATTCAGTTTGCACTCAGCTTACAACTTTGAACTTAAGTTATGCCACAGTCCAGAGCTACGATCTTATCAAGCTTCTTACTCAATGCCCAAAATTGCAGCGCCTCTGGGTGCTGGACTACATTGAGGATGTCGGACTTGAGGTGCTTGCGTCAAGCTGCAAGGACCTACGTGAGCTGAGAGTGTTTCCATCGGAACCTTTT---GTCATGGAACCAAACGTCTCATTAACTGAACAGGGGCTAGTTTCCGTTTCCATGGGGTGTCCCAAACTCGAGTCAGTTCTCTACTTCTGCCGTCAGATGACTAATGCTGCGCTGGTAACAATCGCTAGGAACCGTCCAAACATGACACGCTTCCGCTTATGCATCATTGAGCCCAAAGCCCCAGACTATCTGACTCTAGAGCCACTAGATGTGGGTTTTGGAGCCATAGTCGAGCACTGCAAAGATCTCCGGCGACTCTCACTGTCAGGCCTTCTAACAGACAAAGTTTTCGAATACATTGGGACCCACGCGAAGAAAATGGAAATGCTCTCTGTTGCTTTTGCCGGAGACAGTGATCTAGCAATGCATCATGTTTTGTCCGGTTGCGACAGCTTAAGAAAATTAGAGATAAGGGACTGTCCATTCGGAGACAATGCGCTTTTAGCCAACGCTTCAAAGCTGGAGACAATGCGATCCCTTTGGATGTCTTCTTGCTCTGTAAGTTTTGGAGCCTGCAAGTTATTAGGACAGAAGATGCCAAAACTCAACGTTGAAGTGATAGATGAAAGAGGTCCTCCAGATTCTAGACCCGAGAACTGCCCGGTCGAAAGGGTATTCGTTTACCGAACGGTTCAAGGTCCTCGGTTCGACATGCCTGGGTTCGTCTATAACATGGACCAA---GACTCAACAATGAGGTTCTCAAGGCCAATGATGAGA---AACGGA------------GTATAA
    Aethionema_arabicum_TIR1B_LG10_9766705              ATGCAG---AAGCAACCTACCTTGTCGTTTATTGAAGAGGCACTGGAGCATGTCTTCTCGTTTATACAGTGTGATAAGGATAGGAACTCGGTTTCTCTAGTGTGTAAGTCGTGGTACGAGATCGAGCGTTGGTGTAGGAGAAAAGTCTTTATAGGGAACTGCTATGCGGTTGGACCAGCGACGATGATCAGGAGATTTCCGAAGTTGAGATCTGTGGAGATGAAGGGGAAACCACACTTCGCTGACTTTAATTTGGTGCCTGATGGTTGGGGAGGTTACGTGTATCCTTGGATTGAGGCGATGTCATCGTCGTACTCATGGCTTGAAGAAATAAAGCTGAAAAGGATGGTCGTGACGGATGAGTGTCTAAAGTTAATCGCCAAGTCCTTTAAGAATTTCAAGGTTCTTGTGCTTTCGTCCTGTGAGGGATTCTCCACTGATGGTCTCGCTGCTATTGCTGCTAATTGCAGGAATCTGAGAGAGCTTGAATTGCGAGAGAGTGATGTAGACGATGATAGTGGGGACTGGCTTAGCCATTTCCCAGATTCATATACATCTTTGGTATCACTTAACATTTCATGCTTAGGATCCGAGGTCAGTTTCTCTGTTTTGGAAAGGCTGGTAAGTAGGTGTCCCAATCTCAAGTCTTTGAAGCTTAACCGGGCTGTTCCTCTTGAATCCTTGGCAACTTTACTTCAACGAGCACCTCAATTGGAGGAATTAGGCACTGGTGGGTACACTGCTGATGTTGGACCAGATATTTTCTCAAGTTTATCCCTAGCTTTCTCTGGTTGCAAGGAGTTGAAGTGCTTATCTGGGTTTTGGGATGCTGTGCCTGCGTATCTTCCTGCAGTTTACTCAGTTTGCAGTCAGCTTACAACTTTGAACTTAAGTTATGCCACGGTCCCAAGTTATGATCTTAGCAAACTTCTTACTCAATGTCCAAAATTGCAGCGTCTCTGGGTGCTGGACTACATTGAAGATGTTGGACTTGAGGTGGTAGCATCAATCTGCAAGGACCTACGTGAGCTGAGAGTGTTTCCATCGGAGCCTTTT---GTGGTGGAACAAAACGTTTCATTGACTGAACAGGGACTTGTCTCCGTTTCCATGGGTTGCCCCAAACTCGAGTCAGTTCTCTACTTTTGCCGACAAATGACAAATGCTGCGCTGGTAACAATCGCTAGGAACCGTCCAAACATGACACGCTTCCGCTTGTGCATCATTGAGCCAAAAGCCCCAGACCATTTAACTCTAGAGCCACTAGATGTAGGTTTTGGAGCCATAGTAGAGCACTGCAAAGATCTCCGGCGACTCTCAATGTCAGGACTTCTAACGGACAAAGTTTTCGAATACATTGGGACCCACGCGAAGAAGATGGAAATGCTGTCTGTTGCTTTTGCCGGAGACAGTGACGCAGCGATGCATCATGTCTTATCAGGGTGCGTGAGCTTGAGAAAACTAGAGATAAGGGACTGTCCATTCGGAGACAATGCGCTTTTAGCCAACGCTTCAAAGCTGGAGACATTGCGATCCCTTTGGATGTCTTCTTGTTCTGTAAGTTTTGGAGCCTGCAAGTTATTAGGACAGAAGATGCCAAAACTCAACGTTGAAGTGATAGATGAAAGAGGTCCTCCAGATTCTAGACCCGAGAACTCCCCCGTCGAAAGGGTATTCGTTTACCGAACAGTTCAAGGTCCTCGTTTCGACATGCCTGGCTTCGTCTATAACATGGGCCAC---GACTCAACATTGAG-TGTTCCAGGCCAATCATGAga---aacgga------------gtataa
    Aethionema_arabicum_TIR1C_LG10_9762256              ATGCAG---AAGCAACTTACCT-GTCGT----ATAAGAGGTACTCGAGCATGTTTTCTCGTTTATACAGTTGGATAAGGATAGGAACTCGGTTTCTCTAGTGTGTAAGTCGTGGTACGAGATCGAGCGTTGGTGTAGGAGAAAAGTCTTCATAGGGAACTGCTATGCGGTTGGACCAGCGACGATGATTAGGAGATTTCCGAAGTTGAGATCTGTGGAGATGAAGGGGAAACCACACTTCGCTGACTTTAATTTGGTGCCTGATGGTTGGGGAGGTTACGTGTATCCTTGGATTGAGGCGATGTCGTCGTCCTACTCATGGCTTGAAGAGATAAAGCTGAAAAGGATGGTCGTGACGGATGAGTGTCTAAAGTTAATCGCCAAGTCCTTTAAGAATTTCAAGGTTCTTGTGCTTTCGTCCTGCGAGGGATTCTCCACTGATGGTCTCGCTGCTATCGCTGCTAGTTGCAGGAATCTGAGAGAGCTTGATTTGCGAGAGAGTGATGTAGATGATGTTAGTGGGCACTGGCTTAGCCATTTCCCAGATTCATACACATCTTTGGTATCACTCAACATTTCATGCTTAGGATCCGAGGTCAGTTTCTCTGCTTTGGAAAGGCTGGTAAGTAGGTGTCCCAATCTCAAGTCTCTGAAGCTTAACCGGGCTGTTCCTCTTGAATCCTTGGCAACTTTACTTCAAAGAGCACCTCAATTGGAGGAATTAGGCACTGGTGGGTACACTGCTGATGTTGGACCAGATATTTTCTCAAGTTTATCCGTAGCTTTCTCTGGGTGCAAGGACTTGAAGTGCTTGTCTGGGTTTTGGGATGCTGTGCCTGCGTATCTTCCTGCAGTTTATTCAGTTTGCACTCAGCTTACAACTTTGAACTTAAGTTATGCCACAGTCCAGAGCTATGATCTTATCAAGCTTCTTACTCAATGTCCAAAATTGCAGCGTCTCTGGGTGCTGGACTATATTGAGGATGTTGGACTAGAGGTGGTAGCATCAATCTGCAAGGACCTACGTGAGCTGAGAGTGTTTCCTTCGGAGCCTTTT---GTGGTGGAACAAAACGTGTCATTGACTGAACAGGGACTTGTCTCCGTTTCCATGGGATGCCCCAAACTCGAGTCAGTTCTCTACTTTTGCCGACAAATGACAAATGCTGCGCTGGTAACAATCGCTAGGAACCGTCCAAACATGACACGCTTCCGCTTGTGCATCATTGAGCCAAAAGCACCAGACCATTTAACTCTAGAGCCACTGGATGTGGGTTTTGGAGCCATAGTTGAGCACTGCAAAGATCTTCGGCGACTTTCAATGTCAGGGCTTCTGACAGACAAAGTTTTTGAATACATTGGGACCCACGCGAAGAAGATGGAAATGCTGTCTGTTGCTTTTGCCGGAGACAGTGATGTAGCGATGCACCATGTGTTATCTGGATGCGTGAGCTTGAGAAAACTAGAGATAAGGGACTGTCCATTTGGAGACAAGGCTCTTTTAGCCAACGCTTCAAAGCTGGAGACATTGCGATCCCTTTGGATGTCTTCTTGCTCTGTAAGTTTTGGAGCCTGCAAGTTATTAGGACAGAAGATGCCAAAACTGAACGTGGAAGTGATAGATGAAAGAGGTCCTCCAGATTCTAGACCCGAGAACTGCCCTGTCGAAAGGGTATTCGTTTACCGAACGGTTCAAGGTCCTCGGTTCGACATGCCTGGCTTCGTCTATAACATGGACCAA---GACTCAACAATGAGGTTTTCCAGAGCAATGATGAGA---AATGGA------------GTATAT
	Tarenaya_hassleriana_104817526                      ATGCAG---AAGAGGTTGGCCTTGTCGTTTCCTGAAGAGGTGCTGGAGCACGTCTTCTCGTTCATACAGACCGACAAGGACCGGAACTCGGTGTCTCTTGTCTGCAAGTCGTGGTACGAGATCGAACGATGGTGCCGCAGGAAGGTCTTTGTCGGGAACTGTTATGCCGTCGGACCCGCGACGGTGATCCGACGGTTTCCGGAGGTGAGATCCGTGGAGCTGAAGGGAAAACCACACTTCGCCGACTTTAATCTGGTGCCTGACGGCTGGGGAGCGTACGTACACCCTTGGATTGATGCGATGTCGACGGCGTACATGTGGCTCGAGGAGATAAGGCTGAAAAGGATGGTGGTCACTGACGAGTGCCTGGAGCACATCGCTAAGTCCTTTAAGAACTTCAAGGTTCTCGTGCTTTCTTCCTGCGAGGGGTTCTCCACCGATGGTCTCGCCGCCATCGCTTCCAATTGCAGAAATCTGAGAGAGCTTGATTTGCGGGAGAGTGATGTGGAAGATGTTAGTGGCCATTGGCTCAGTCATTTCCCAGATTCGTACACATCATTGGTGTCCCTTAACATCTCATGCTTATCATCTGAGGTAAGCTTTTCTGCTTTGGAGCGTCTGGTGAGTAGGTGTCCCAACCTGATGTCTCTCCGCCTCAACCGGTCCGTCCCTCTTGAAAGACTTGCGACCTTACTTCAGAGAGCACCGCAATTGATTGAGCTGGGCACTGGCGCTTACACGGCTGAAGTGCGGCCTGATGTTTTTTCAAGTTTATCTGGTGCTTTCGCTGGTTGTAAAGGGCTGAAGAGCTTGTCTGGGTTTTGGGATGTTGACCCTGCGTATCTCCCAGCAATGTATTCTGCTTGCAGTAGACTTACGACATTGAACCTGAGTTACGCGACTGTTCAGAGCTCTGATCTTGTCAAGCTTCTCAGTCAATGTCCGAAATTACAGCGCCTTTGGGTATTGGATTACATTGAAGATGCTGGTCTTGAGGCCCTAGCATCCAGCTGCAAGGACCTACAGGAATTGAGAGTGTTTCCATCGGAGCCGTTT---GTCATGGAACCAAATGTGTCATTGACAGAACAAGGGCTTGTCTGTGTTTCCGAAGGCTGTCCAAAACTCGAATCAGTTCTCTATTTCTGCCATCAAATGACAAATGCTGCTTTAATCACTATAGCCAGGAACCGGCCCAACTTGACTCGTTTCCGTTTATGCATCATTGAGCCAAAAACTCCAGACTACATGACTCTGCAGCCACTTGACGTGGGTTTTGGAGCAATAGCTGAGCACTGCAAGGAACTAAGGCGTCTCTCGCTCTCGGGTCTTCTGACTGACAAGGTGTTTGAATACATTGGGACATACGCCAAGAAGTTGGAGATGCTGTCAGTGGCCTTTGCGGGAGATAGTGACCTTGGGCTGCATCATGTTCTATCGGGGTGCGACAGCCTGAGAAAATTAGAGATAAGGGACTGCCCCTTTGGGGACAAGGTGCTTTTAGCCAACGCTCCTAAGCTGGAGACAATGCGATCCCTTTGGATGTCATCTTGTTCCGTGAGTTTTGGGGCGTGTAAACTGCTAGGCCTGAAGATGCCGAGGCTCAATGTGGAAGTCATTGACGAAAGGGGTCCACCCGACTCTAGACCTGACAGCTGCCCGGTGGAGAGGGTGTATATATACAGAACGGTGGCAGGCCCTCGGTTTGACATGCCTGGGTTTGTGTGGAACATGGACGAG---GACTCTAGCATGAGGTTTTCCCGGCAGATTGTGACA------------------------TGA
	Tarenaya_hassleriana_104802204                      ATGCAG---AAAAGGTTCGCCTTGTCGTTTCCTGAAGAGGTGCTGGAGCACGTCTTCTCGTTCATACAGTCGGACACGGACCGTAACTCGGTGTCTCTGGTCTGCAAGTCGTGGTACGGGATCGAGCGATGGTGCCGGAGGAAGGTCTTTGTCGGGAACTGCTACGCCGTTGGACCCGCGACTGTTATCCGGCGGTTTCCGGAGGTAAGATCCGTGGAGCTGAAGGGAAAACCACACTTCGCCGACTTCAATCTGGTGCCTGACGGCTGGGGAGGATACGTGCACCCTTGGGTTGAGGCGATGTCGACGTCGTACACGTGGCTGGAGGAGATAAGGCTGAAGAGGATGGTGGTCACCGACGAGTGCCTGGAGCTCATCGCCAAGTCCTTTAAGAACTTCAAGGTTCTCGTGCTTTCTTCCTGCGAGGGATTCTCCACCGATGGTCTCGCTGCCATCGCCGCCAATTGCAGAAATCTGAGAGAGCTTGATTTGCGAGAGTGTGATGTGGAGGACGTTAGTGGGCACTGGCTCAGTCATTTCCCCGATTCATACACATCTTTGGTATCCCTTAACATCTCGTGCTTATCATCTGAGGTCAGTTTCTCTGCTTTGGAGCGTCTGGTGAGTAGGTGTCCTAATCTGAAGTCTCTCCGACTCAACCGTGCTGTCCCTCTGGAAAGGCTTGCGACCTTACTTCAGAGAGCACCACAGTTGGTTGAGCTGGGCACCGGTGGTTACACAGCTGAACTGCGACCAGATGTTTTTTCAAGTTTATCTGCTGCTTTCTCCGGTTGCAAAGGGCTGAAGAGCTTGTCTGGGTTTTGGGATGCTGTTCCTGCATATCTTCCTGCAATTTATTCTGCTTGCAGTGGACTTACAACATTGAACCTGAGTTATGCTACTGTTCAGAGTTCTGATCTTGTCAAGCTTCTCAGTCAGTGTCAGAAATTGCAGCGTCTTTGGGTATTGGATTACATTGAGGATGTTGGCCTTGAGGCGCTTGCATCAAGCTGCAAGGACCTACGGGAATTGAGAGTGTTTCCCTCTGAGCCCTTT---GTCATGGAACCAAATGTGTCATTGACAGAACGAGGGCTTGTCTGTGTTTCCGAAGGCTGTCCAAAACTAGAATCAGTTCTCTATTTCTGCCGTCAAATGACAAATGCAGCCTTAGTCACAATAGCCAGGAACCGTCCCAACTTGACTCGTTTCCGTTTATGCATCATTGAGCCAAAAGCTCCAGACTACATGACTCTGCAGCCGCTGGATGTGGGTTTTGGAGCAATAGCAGAGCACTGCAAGAAGCTACAGCGGTTCTCACTCTCGGGCCTTCTGACTGACAAGGTGTTTGAATACATTGGGACCTATGCAAAGAAGTTGGAGATGCTGTCAGTCGCATTTGCCGGGGACAGTGACCTTGGGATGCATCATGTTCTGTCCGGGTGCGATAACCTTAGGAAATTAGAGATAAGGGACTGCCCCTTTGGGGACAAAGCGCTCCTGGCCAATGCTTCTAAGCTGGAGACAATGCGATCCCTTTGGATGTCTTCATGCTCCGTGAGTTTCGGGGCGTGTAAGCTGCTTGGCCAGAAGATGCCGAGGCTCAACGTGGAAGTCATTGACGAACGGGGTCCACCCGACTCTCGACCAGACAGCTCCCCTGTCGAGAGGGTCTACATATACAGAACAGTGGCAGGTCCTAGGTTTGACATGCCTGGCTTCGTGTGGAACATGGACGAG---GACTCTACCATGAGGTTTTCCCGGCAAATTGCGACA------------------------TGA
	Polanisia_trachysperma_QSKP2005544e                 ATGCAG---AAGAGGTTGGCCTTGTCGTTTCCCGAAGAGGTGCTGGAGCACGTCTTCTCGTTCATACAGTCGGACAAGGACCGGAACTCGGTGTCCCTGGTCTGCAAGTCGTGGTACGAGATCGAGCGGTGGTGCCGGAGGAAGGTCTTCGTTGGGAACTGCTACGCTGTCGGACCCTCGACGGTGATCCGGCGGTTCCCGGAGGTGAGATCCGTGGAGCTCAAGGGGAAACCGCACTTCGCCGACTTCAATCTGGTGCCTGACGGCTGGGGAGGCTACGTGTGCCCTTGGATTGAGGCGATGTCGACGGCGTACACGTGGCTTGAGGAGATAAGGCTGAAGAGAATGGTAGTCACTGACGAGTGCCTGGAGCTTATCGCCAAGTCGTTTAAGAACTTCAAGGTTCTAGTGCTTTCCTCCTGCGAAGGTTTCTCCACCGATGGTCTCGCTGCCATTGCTGCCAATTGCAGAAATCTGAGAGAGCTTGATTTGCGAGAGAGTGATGTGGAGGATGTTAGTGGACACTGGCTCAGCCATTTCCCAGATACATACACATCGTTGGTGTCCCTCAACATCTCGTGCTTATCATCTGAGGTCAGTTTCTCTGCTTTGGAGCGTCTGGTGAGTAGGTGTCCCAACCTGAAGTCTCTCCGGCTCAATCGGGCTGTTCCTCTTGAAAGACTTGCGACCTTACTTCAGAGAGCACCACAATTAGTTGAGCTAGGCACTGGTGGTTATACTGCCGAAGTGCGGCCAGAAGTTTTTTCAAGCTTATCTGGAGCTTTCTCTGGCTGCAAAGAGCTGAAGAGTTTGTCTGGGTTTTGGGATGTTGTCCCTGCATATCTTCCAGCAATTTATTCTGCTTGCAATGGACTTACGACATTGAACCTGAGTTATGCTACTGTTCAGAGCTCTGATCTTGTCAGGCTTCTCTGTCAATGTCCGAAATTGCAGCGCCTTTGGGTATTGGATTACATTGAAGATGTTGGTCTTGAGGCGCTTGCATCAAGTTGCAAGGACCTACGGGAATTGAGAGTGTTTCCGTCTGAGCCCTTT---GTCATGGAACCGAACGTGTCATTGACAGAACGAGGGCTAGTCTGTGTTTCCGAAGGCTGTCCAAAACTCGAGTCAGTTCTTTACTTCTGCCGTCAAATGACAAATGCTGCTTTAGTTACCATAGCCAGGAACCGCCCCAACTTGACTCGCTTCCGTTTGTGCATCATTGAGCCAAAAGCTCCTGACTACATGACTCTGCAGCCACTCGACGTGGGTTTTGGAGCCATAGTTGAGCACTGCAAGCAACTAAGGCGCCTCTCCCTCTCGGGTCTTCTGACTGACAAGGTGTTTGAATACATAGGGACCTTCGGCAAGAAGTTGGAGATGCTGTCAGTGGCCTTTGCTGGAGACAGTGACCTTGGCCTGCATCATGTTCTATCGGGGTGCGATAGCTTGAGGAAATTAGAGATAAGGGACTGTCCCTTTGGGGACAAGGCGCTTTTGGCCAACGCTTCAAAGCTGGAGACAATGCGATCCCTTTGGATGTCTTCATGCTCCGTGAGTTTCGGGGCGTGTAAGCTGCTAGGCCAGAAGATGCCGAGGCTCAACGTGGAAGTCATCGATGAACGGGGGCCACCCGACTCTAGACCGGACAGCTGCCCAGTCGAGAGGGTGTACATATACAGAACAGTGGCAGGTCCTCGGTTTGACATGCCTGGGTTTGTCTGGAACATGGACGAG---GACTCGGCCATAAGGTTCTCCGGGCAAATAGTCACA------------------------TAA
	Salvadora_RTTY2007068                               ATGCAG---AAGAGATTGGCGTTGTCGTTTCCCGAGGAGGTGCTGGAGCACGTCTTCTCGTTCATACTGTCAGACAAAGACCGGAACGCTGTGTCTCTGGTGTGCAAGTCGTGGTATGAGATCGAGCGGTGGTGTAGGAGGAAGGTCTTCGTCGGAAACTGCTACGCCGTGAGCCCTGCGGTGTTGATCCGGAGGTTTCCGGAGGTGAGATCCGTAGAGCTGAAGGGAAAACCGCACTTCGCGGACTTCAATCTGGTGCCGGACGGCTGGGGAGGGTTCGTGCAGCCTTGGATTGAGGCGATGTCGACGGCGTATACGTGGCTGGAGGAGATAAGGTTGAAGAGGATGGTGGTGACTGATGAGTGCCTGGAGCTCATCGCCAAGTCCTTCAAGAACTTCAAGGTCCTTGTGCTTTCCTCCTGCGAGGGGTTCTCCACTGATGGTCTCGCTGCCATTGCTGCCAATTGCAGAAACCTGAGAGAGCTTGATTTGCGTGAAAGTGATGTGGAGGATTTTAGTGGGCACTGGCTCAGCCACTTCCCAGATACATACACATCATTGGTGTCTTTAAATATCTCTTGCCTATCATCTGAAGTTAGCTTCTCTGCGTTGGAGCGTCTGGTGGGCAGGTGTCCCAACTTGAAGTCTCTCCGGCTCAACCGAACTGTTCCTTTGGAAAGGCTTGCGTCCTTACTTCAGGGGGCTCCTCAATTGGTTGAGTTGGGCACTGGTGGTTACACTGCTGAACTCCGGCCAGATGTCTTTTCAAATTTATCTGGAGCTTTCTCTGGCTGCAAGGAGCTGAAGAGCTTGTCTGGGTTTTGGGATGTTGTCCCTGCATATCTTCCAGCAATTTATTCTGCTTGCAGTGGACTCTCGACTTTGAACCTGAGTTATGCTACGGTCCAGAGCTCTGACCTTGTGAAGCTTCTTACTCAATGTCCAAAATTGCAGCGCCTGTGGGTATTGGATTATATTGAAGATGCTGGCCTTGAAGCTCTTGCATCAAGCTGCAAAGACCTACAGGAATTGAGGGTGTTTCCGTCTGAGCCCTTT---GTAGTGGAACCGAATGTGCTGTTGACGGAACGAGGGCTTGTCTGTGTTTCTGAAGGTTGTCCAAAACTTGAGTCAGTTCTGTACTTCTGCCGTCAAATGACCAATGATGCTCTAGTCACGATAGCTAGGAATCGCCCCAACATGATTCGCTTTCGGTTGTGCATCATTGAGCCAAAAGCCCCTGACTACCTAACTTTGGAACCCCTTGATGTGGGTTTTGGAGCCATAGTTGAGCACTGCAAGGATCTCCGCCGGCTCTCGATGGCAGGTCTCTTAACTGACAAGGTTTTTGAATACATTGGGACTTACGCCAAGAAGTTAGAAATGCTGTCCGTGGCCTTTGCTGGCGAAAGTGATCTGGGTCTACACCATGTTCTATCTGGGTGCGACAGCCTAAGGAAATTAGAAATAAGGGACTGCCCTTTTGGGGACAAGGCGCTTTTGGCCAACACTGCAAAGCTGGAGACAATGCGATCCCTTTGGATGTCTTCTTGCTCTGTGAGTTTTGGGGCATGCAAACTGCTAGGCCAGAAGATGCCAAGGCTCAATGTGGAAGTTATTGATGAACGTGGTCCACCCGATTCAAGGCCCGATAGTTGCCCTGTCGAGAAGATATATGTATATAGGACAGTTTCAGGTCCTCGGTTTGACATGCCCGGCTTCGTCTGGAACATGGACGAA---GACACTGCAGTGAGGTTTTCCCGGCAAATCATCACA------------------------TGA
	Gyrostemon_ramulosus_UAXP2017558                    ATGCAG---AAGAAAATGGCGTTATCGTTCCCAGAGGAGGTGCTTGAGCACGTATTCTCTTTCATTCGTTCAGATAAGGATCGAAACGCCGTGTCCTTAGTGTGCAAGTCGTGGTACGAGATCGAGCGGTGGTGCCGGCGGAAGGTCTTTGTTGGAAACTGCTACGCCGTGAGCCCCGCGGCGGTGATCCGGAGATTTCCAGAGGTGAGATCCTTGGAGTTGAAAGGGAAGCCGCATTTCGCGGACTTCAATCTTGTGCCGGATGGATGGGGAGGATATGTGTACCCTTGGATCGAAGCGATGTCTAAGGCG??????????????????ATTCGGCTGAAGAGGATGGTTGTGACGGACGAGTGCCTGGAGCTCATCGCCAAGTCGTTTAAGAACTTCAAGGTGCTTGTCCTCTCTTCTTGCGAGGGGTTCTCTACTGATGGTCTCGCTGCCATTGCCGCCCATTGCAGAAGTCTAAGAAAGCTTGATCTGAGGGAGAGTGAAGTAGATGATGTGAGTGGGCATTGGCTCAGCCATTTCCCAGACTCGTACACATCACTGGTGTCTCTCAACATCTCATGCCTTGGGTCTGAGGTTAGCTTTTCAGCCCTGGAGCGTCTCGTGAGTAGGTGTCCCAATCTGAAGTCTCTCCGGCTCAATCGAGCCGTGCCTCTTGAAAGACTTGCAAACTTAATTAAGAGGGCACCTCAACTTGTTGAGTTGGGCACGGGCGCTTACACGGCTGAACTGCACCCAGATGTCTTCTCAAATTTATCAAGAGCTTTTTCAGGTTGCAAGGCACTAAAGAGCTTGTCTGGGTTTTGGGATGCTGTACCCGCTTATCTTCCAGCTTTTTATTCTGTTTGCTCCGGGCTATCTACATTGAACTTGAGTTATGCCACTGTCCAAAGCTCTGATCTTGTGAAGCTTCTTAGTCAGTGTCCAAAGTTGCAGCGCCTTTGGGTATTGGATTACATAGAGGATAGTGGACTTGAAGCTGTTGCAACTTCTTGCAAAGACCTCAGAGAATTGAGAGTGTTCCCATCGGATCCCTTT---GGTGTGGAACCCAACGTGTCCTTGACAGAACAAGGCCTTGTCTCAGTTTCAGAGGGTTGTCCCAAACTCGAGTCAGTTCTCTATTTCTGCCGCCAATTCACAAACGCCGCTTTAGTTACAATTGCTAGAAATCGCCCAAACTTTACTCGCTTCCGTCTATGCATCATGGAGCCAAAAACACCCGACTACTTAACCCGTCAGCCACTTGATGTGGGTTTTGGAGCCATAGTTGAGCACTGCAAGGATCTGAGGCGACTCTCCCTTTCCGGTCTCCTCACAGACAAAGTTTTTGAATACATTGGGACTTATGCGAAAAAGCTGGAGATGCTGTCCGTGGCGTTTGCTGGTGAAAGTGATATAGGGCTTCACCATGTGTTGTCTGGGTGTGATAGCCTGAGGAAGCTGGAGATAAGGGACTGCCCCTTTGGGGACAAGGCGCTTTTGGCCAATGCTGCAAAGCTAGAGACAATGCGATCCCTTTGGATGTCTTCTTGCTCTGTCAGCTTCGGGGCTTGCAAGCTGTTAGGTCAGAAGATGCCGAGGCTTAATGTGGAAGTCATCGATGAACGGGGCCCACCGGATTCACGAGCAGAAGATTCTCCTGTTGAGAAGCTCTACGTTTACAGGACTGTGGCTGGTCCTAGGTTTGACATGCTAGGTTATGTCTGGAATATGGATGAG---GATTCTGCAGTGAAACTGACTAGACAGTTAGCAACC------------------------TGA
	Arabidopsis_thaliana_AT4G03190_AFB1                 ---------------ATGGGTCTCCGATTCCCACCTAAGGTGTTGGAACATATCCTCTCCTTCATTGATTCCAACGAGGACCGGAACTCTGTTTCTCTGGTCTGCAAGTCATGGTTTGAGACAGAACGGAAGACTAGGAAGCGAGTCTTTGTCGGAAACTGTTACGCGGTCAGTCCTGCTGCGGTTACACGACGGTTCCCGGAGATGAGATCTTTGACTTTGAAGGGGAAGCCACACTTCGCTGACTATAATCTCGTTCCTGATGGTTGGGGTGGTTATGCTTGGCCGTGGATTGAAGCTATGGCGGCGAAAAGTTCGTCTCTTGAAGAGATCAGAATGAAGAGGATGGTGGTGACTGATGAGTGCTTAGAGAAAATTGCTGCTTCGTTTAAGGATTTTAAAGTCCTTGTGTTGACTTCTTGTGAAGGTTTCTCTACTGATGGTATCGCTGCTATTGCAGCTACTTGCAGGAACTTGAGAGTGTTGGAACTACGAGAGTGTATTGTTGAAGATTTAGGAGGAGATTGGCTTAGCTATTTTCCAGAGAGTTCAACTTCTTTGGTCTCTCTTGACTTCTCTTGTTTAGATTCTGAGGTTAAAATCTCGGATTTAGAGCGTCTTGTGAGCAGATCTCCAAACTTGAAGTCTTTGAAGTTGAATCCAGCTGTGACTCTAGATGGACTCGTTAGCTTACTTCGTTGTGCTCCACAACTGACTGAGCTCGGCACAGGTTCTTTCGCAGCTCAATTGAAACCTGAAGCGTTTTCAAAGTTATCAGAAGCTTTTTCAAACTGTAAGCAACTTCAGAGCTTATCTGGTCTCTGGGATGTCCTCCCTGAATATCTTCCAGCTCTTTATTCTGTCTGTCCTGGTCTTACCTCGTTGAACTTGAGCTACGCTACTGTCCGAATGCCTGATCTTGTTGAGCTTCTTAGGCGATGCTCGAAACTGCAGAAGCTATGGGTGATGGACTTGATTGAGGACAAAGGTCTTGAAGCTGTTGCCTCATATTGCAAGGAACTGCGAGAACTGAGGGTGTTTCCATCTGAGCCAGAT---CTTGATGCAACCAACATACCTCTGACGGAACAAGGCCTGGTCTTTGTGTCTAAAGGCTGTCGAAAGCTTGAGTCTGTTCTCTACTTCTGTGTCCAGTTCACAAACGCAGCTTTGTTTACCATAGCAAGAAAACGTCCGAATCTCAAGTGCTTCCGTCTCTGTGTGATAGAGCCATTTGCTCCTGATTACAAAACAAATGAGCCACTTGATAAAGGATTCAAAGCCATAGCTGAGGGATGCAGGGATCTTCGACGGCTCTCCGTCTCTGGTCTTCTCTCTGACAAGGCCTTCAAATACATTGGGAAACATGCCAAGAAGGTTAGGATGCTATCAATAGCATTTGCTGGGGACAGTGATTTGATGCTTCATCACTTGTTGTCGGGCTGTGAGAGTTTAAAGAAGCTTGAGATACGAGACTGCCCTTTTGGAGACACTGCACTACTGGAGCACGCTGCCAAGCTAGAGACCATGCGATCCCTTTGGATGTCATCTTGCTTTGTAAGTTTTGGTGCTTGCAAGCTTCTAAGTCAGAAAATGCCAAGGCTCAATGTCGAAGTCATTGATGAACAT---CCTCCAGAGTCAAGACCTGAGAGCTCTCCAGTTGAGAGGATATACATATACAGAACAGTCGCAGGACCGAGAATGGATACGCCTGAATTTGTGTGGACGATACACAAG---AATCCTGAGAATGGAGTTTCACATCTAGCCATAAAG------------------------TAA
	Arabidopsis_halleri_7612s0017                       ---------------ATGGGTCTCCGATTACCATCTAAGGTGTTGGAACATATCCTCTCCTTCATTGATTCCAACGAGGACCGGAACTCTGTTTCTCTGGTCTGCAAGTCATGGTTCGAGACAGAGCGGAAGACTAGGAAGCGGGTCTTTGTCGGAAACTGTTACGCGGTTAGTCCTGCTGCAGTTGCAAAGCGGTTCCCGGGGATGAGATCTTTGACTTTGAAGGGGAAGCCACACTTCGCCGACTATAATTTGGTTCCTGATGGTTGGGGTGGTTATGCTTGGCCGTGGATTGAAGCCATGGCGGCGAAATGTCCGTCTCTTGAGGAGATCAGATTGAAGAGAATGGTGGTGACTGATGAATGCTTAGAAAAAATTGCTGCTTCGTTTAAGGATTTTAAAGTCCTTGTATTGACTTCTTGTGAAGGTTTCTCTACTGATGGTATCGCTGCTATTGCAGCAACTTGCAGAAACTTGAGAGTGTTGGAACTACGAGAGTGTATTGTTGAAGATCTAGGAGGAGATTGGCTTAGCTATTTTCCAGAGACTTCAACTTCTCTGGTCTCTCTTGACTTCTCTTGTTTAGATTCTGAGGTTAAAATCTCGGACTTAGAGCGTCTCGTGAGCAGATCTCCAAACCTGAAGTCTCTAAAGTTGAATCCAGCTGTGACTCTAGATGGACTTGTTAGCTTACTTCGTCGTGCTCCACAACTGACTGAGCTCGGCACAGGTTCTTTCGCAGCTCAACTGAAACCAGAAGCGTTTTCAAAGTTATCAGAAGCTTTTTCAAACTGTAAGCAACTTCAGAGCTTATCTGGTCTCTGGGATGTCCTCCCTGAATATCTTCCAGCTCTTTATTCTGTCTGTCCTGGTCTTACCTCGTTGAACTTGAGCTACGCTACTGTCCGAATGCCTGATCTTGTCGAGCTTCTTAGGCGATGCTCGAAACTGCAGAAGCTATGGGTGATGGACTTGATAGAGGACAAAGGTCTTGAAGCTGTTGCCTCCTATTGCAAGGAACTGCGAGAACTGAGGGTGTTTCCATCTGCGCCAGAT---CTCGATGAAGCCAACATACCTCTGACGGAACAAGGCCTGGTCTTTGTGTCTAAAGGCTGTCGAAAACTGGAGTCTGTTCTCTACTTCTGTGTCCAGTTCACAAACGCAGCTTTGCTTACCATAGCAAGAAAACGTCCGAATCTCAAGTGCTTCCGTCTCTGTGTGATAGAGCCATTTGCTCCTGATTACAAAACAAATGAGCCACTTGATAAAGGATTCAAAGCGATAGCTGAGGGATGCAAGGATCTTCGACGGCTCTCCGTCTCTGGTCTCCTCTCCGACAAGGCCTTCAAATACATTGGGAAACATGCAAAGAAGGTAAGGATGCTATCAATAGCATTTGCTGGGGACAGTGATTTGATGCTTCATCACTTGTTGTCGGGCTGTGAGAGTTTAAAGAAGCTTGAGATAAGAGATTGCCCTTTCGGAGACACTGCACTACTGGAGCACGCTGCCAAACTGGAAACCATGCGATCCCTTTGGATGTCGTCTTGCTTTGTAAGTTTTGGTGCTTGCAAGCTTCTAAGTCAGAAAATGCCAAGGCTCAATGTCGAAGTTATTGATGAACAT---CCTCCAGAGACAAGACCTGAGAGCTCTCCAGTTGAGAGGATATACATATATAGAACAGTCGCTGGACCGAGAATGGACACGCCTGAATTTGTGTGGACGATTCACAAG---AATCCCGAGATCGGAGTTTCACATCTAGCCATAAAG------------------------TAA
	Arabidopsis_lyrata_AL6G49750                        ---------------ATGGGTCTCCGGTTACCATCTAAGGTTCTGGAACATATCCTCTCCTTCATTGATTCCAATGAGGACCGGAACTCTGTTTCTCTGGTCTGCAAGTCATGGTTCGAGACAGAACGGAAAACTAGGAAGCGGGTCTTTGTCGGAAACTGTTACGCGGTCAGTCCTGCTGCTGTTGCAAAGCGGTTCCCGGAGATGAGATCTTTGACTTTGAAGGGTAAGCCACACTTTGCTGACTATAATTTGGTTCCTGATGGTTGGGGTGGTTATGCTTGGCCGTGGATTGAAGCCATGGCGGCGAAATGTCCGTCTCTTGAGGAGATCAGATTGAAGAGAATGGTGGTGACTGATGAGTGCTTAGAAAAAATTGCTGCTTCGTTTAAGGATTTTGAAGTCCTTGTGTTGACTTCTTGTGAAGGTTTCTCTACTGATGGTATTGCTGCTATTGCAGCAACTTGCAGAAACTTGAGAGTGTTGGAACTACGAGAGTGTATTGTTGAAGATCTAGGAGGAGATTGGCTTAGCTATTTTCCAGAGACTTCAACTTCTCTGGTCTCTCTTGACTTCTCTTGTTTAGATTCCGAGGTTAAAATCTCGGACTTAGAGCGTCTCGTGAGCAGATCTCCAAACCTCAAGTCTCTGAAGTTGAATCCAGCTGTGACTCTAGATGGACTCGTTAGCTTGCTTCGTCGTGCTCCACAACTGACTGAGCTCGGCACAGGTTCTTTCGCATTTCAACTGAAACCAGAAGCGTTTTCAAAGTTATCAGAAGCTTTTTCAAACTGTAAGCAACTTCAGAGCTTATCTGGTCTCTGGGATGTCCTCCCTGAATATCTTCCAGCTCTTTATTCTGTCTGTCCTGGTCTTACCTCGTTGAACTTGAGCTACGCTACTGTCCGAATGCCTGATCTTGTCGAGCTTCTTAGGCGATGCTCGAAACTGCAGAAGCTATGGGTGATGGACTTGATAGAGGACAAAGGTCTTGAAGCTGTTGCCTCCTATTGCAAGGAACTGCGAGAACTGAGGGTATTTCCATCTGCGCCAGAT---CTCGATGAAGCCAACATACCTCTGACGGAACAAGGCCTGGTCGTTGTGTCTAAAGGCTGTCGAAAGCTGGAGTCTGTTCTCTACTTCTGTGTCCAGTTCACAAACGCAGCTTTGCTTACCATAGCAAGAAAACGTCCGAATCTCAAGTGCTTCCGTCTCTGTGTGATAGAGCCATTTGCTCCCGATTACAAAACAAATGAGCCACTTGATAAAGGATTCAAAGCGATAGCTGAGGGATGCAAGGATCTTCGACGGCTCTCCGTCTCTGGTCTCCTCTCCGACAAGGCCTTCAAATACATTGGGAAACATGCCAAGAAGGTTAGGATGCTATCAATAGCATTTGCTGGGGACAGTGATTTGATGCTTCATCACTTGTTGTCGGGCTGTGAGAGTTTAAAGAAGCTTGAAATAAGAGATTGCCCTTTTGGAGACACTGCACTACTGGAGCACGCTGCGAAACTAGAAACCATGCGATCCCTTTGGATGTCGTCCTGCTTTGTAAGTTTTGGTGCTTGCAAGATTCTAAGTAAGAAAATGCCAAGGCTCAATGTCGAAGTCATTGATGAACAT---CCTCCAGAGACAAGACCTGAGAGCTCTCCAGTTGAGAGGATATACATATATAGAACAGTCGCTGGACCGAGAATGGATACACCTGAATTTGTGTGGACGATACACAAG---AATCCTGAGATCGGAGTTTCACATCTAGCCATAAAG------------------------TAA
	Cardamine_hirsuta_CARHR251620                       ---------------ATGAATCTCAGATTACCATCTAAGGTTCTTGAGCATATCATCTCCTTCATCGATTCCAACGAGGACCGGAACTCAGTTTCTCTGGTATGCAAGTCATGGTTCGAGACAGAGAGGAAGACTAGGAAACGAGTCTTTGTTGGGAACTGTTATGCCATCACTCCTGCTGCGGTTGTAAAACGGTTCCCGGAGATGAGATCTTTAACTTTGAAGGGGAAGCCACACTTCGCTGACTATAATTTGGTCCCTGATGGTTGGGGTGGTTATGCTTGGCCTTGGATTGAAGCCATGGCCAAGAAAAGCCCTTCCCTTGAGGAAATAAGCTTGAAGAGAATGGTTGTGACTGATGAGTGTTTGGAGTTGATTGCTGCTTCGTTTAAAGACTTTAAAGTTCTTGTCTTGACTTCTTGTGAAGGTTTCTCCACTGATGGTATCGCTGCTATTGCAGCTACTTGCAGAAACTTGAGAGTGTTGGAACTACGAGAGTGTATTGTTGAAGATCTAGGAGGAGATTGGCTTAGCTATTTCCCAGAAACTTCAACATCTCTGGTTTCTCTTGACTTCTCTTGTTTAGATTCTGAGGTTAAACTCTCGGATTTAGAGCGTCTCGTGAGCAGAAGTCCTAACCTGAAGTCTCTCAAGTTGAATCCAGCTGTGACTGTTGATGGACTTGAGAGCTTACTTCGTCGTGCTCCACAACTAACTGAGCTCGGCACAGGTTCTTTCTCAGCTGAATTGAAACCAGAAGCGTTTAAGAAGTTATCAGAAGCTTTTGCAAACTGTAAGCAGCTCAAGTGCTTATCTGGTCTCTGGGATGTTCTCCCTGAGTATCTTCCAGCTCTTTATTCTGTCTGTCCTGGTCTTACCTCGTTGAACTTGAGCTACGCTACTGTCCGAATGCCTGATCTTGTCGAGCTTCTTCGTCGATGCTCCAAGTTGCAGAAGCTATGGGTGATGGACTTGATAGAAGACAGAGGTCTTGAAACCGTTGCTTCGTGTTGCAAGGAACTGCTAGAACTGAGGGTGTTTCCTTCTGTACCAGAT---CTCGATGCAACAAACGTAGCTCTCACGGAACAAGGCTTGGTCATTGTGTCTCAAGGCTGTCCAAAGCTTGAGTCTATCCTCTACTTCTGTGTCCAGTTCACAAACGCAGCTTTGATTACCATAGCAAGAAACCGTCCAAATATCAAGCGTTTCCGTCTTTGTGTGATAGAGCCATTTGCTCCTGATTACAAAACACATGAGCCACTTGATAAAGGATTCAAAGCCATAGCGGAGCGATGCAAGGATCTTCAGAGACTCTCCGTATCTGGTCTCCTCACTGACAAGGCCTTTAAATACATTGCGAAACATGCCAAGAAGGTTAAGATGCTATCAGTAGCGTTTGCTGGAGACAGTGATTTGATGCTCCATCACTTGTTGTCAGGCTGTGAGAGTTTAAAGAAGCTTGAGATAAGAGATTGCCCTTTCGGAGACACTGCACTACTGGAGAACGCTTCGAAACTAGAAACCATGCGATCCCTTTGGTTGTCATCTTGCTTTGTAAGTTTTGGTGCTTGCAAGCTTCTGAGTCAGAAAATGCCAAGGCTCAATGTTGAAGTCATTGATGAACAT---CCTCCAGAGACAAGACCTGAGAGCTCTCCTGTTGAGAGGATATACATATACAGAACAGTCGCAGGACCAAGATTGGACATGCCTGAATTTGTGTGGACAATACACAAG---AATCCTGAGATCGGAGTTTCACATCTAGCCATAAAG------------------------TAA
	Boechera_stricta_2983s0123                          ---------------ATGACTCTCCGATTACCATCTAAGGTTCTGGAACATATCCTCTCCTTCATTGATTCCAACGAGGACCGGAACTCAGTTTCTCTGGTCTGCAAGTCATGGTTCGAGACAGAACGGAAGACTAGGAAGCGAGTCTTTGTCGGAAACTGTTACGCGGTCAGTCCTGCTGCTGTCGCACGACGGTTCCCGGAGATGAGATCCCTGACTTTGAAAGGGAAGCCACACTTCGCCGACTATAATTTGGTTCCTGATGGTTGGGGTGGTTATGCTTGGCCGTGGATTGAAGCCATGGCGGCGAAAAGCCCGTCCCTTGAAGAGATAAGATTGAAGAGAATGGTGGTGACTGATGAGTGCTTAGAAAAAATTGCTGCTTCGTTTAAGGATTTTAAAGTCCTTGTGTTGACTTCTTGTGAAGGTTTCTCCACTGATGGTATCGCTGCTATTGCAGCTACTTGCAGAAACTTGAGAGTGTTGGAACTACGAGAGTGCATCGTTGAAGATCTAGGAGGAGATTGGCTTAGTTATTTCCCAGAGACTTCAACTTCTCTGGTCTCTCTTGACTTCTCTTGTTTAGACTCTGAGGTTAAAATCTCGGACTTAGAGCGTCTCGTGAGCAGATCTCCAAACCTGAAGTCTCTGAAGTTGAATCCAGCTGTGACTCTTGATGGACTCGTTAGCATACTTGGTCGTGCTCCACAACTGACTGAGCTCGGCACAGGTTCTTTCGCAGCTGAATTGAAACCAGAAGCGTTTTCAAAGTTATCAAAAGCTTTTTCAAACTGTAAGCAACTTCAGAGCTTATCTGGTCTTTGGGATGTTCTCCCTGAATATCTTCCAGCTCTTTATTCTGTATGTCCTGGTCTTACCTCGTTGAACTTGAGCTATGCTACTGTCCGAATGCCTGATCTTGTTGAGCTTCTTAAGCGATGCTCGAAACTGCAGAAGCTATGGGTGATGGACTTGATAGAGGACAAAGGTCTTGAAGCTGTTGCCTCCTATTGTAAGGAACTGCGAGAACTGAGGGTGTTTCCATCTGAGCCAGAT---CTCGATGCAACCAACATACCTGTGACGGAACAAGGCCTGGTCTTTGTGTCTAAAGGCTGTCGAAAGCTTGAGTCTGTTCTCTACTTCTGTGTCCAGTTCACAAACGCAGCTTTGATTACTATAGCAAGAAAACGTCCGAATCTCAAGTGCTTCCGTCTCTGTGTGATAGAGCCATTCGCTCCTGATTACAAAACAAATGAGCCACTTGATAAAGGATTCAAAGCCATAGCTGAGGGATGCAAGGATCTTCGACGGCTCTCCGTCTCTGGTCTCCTCTCTGACAAGGCCTTTAAATACATTGGGAAACATGCCAAGAAGGTTAGGATGCTATCAATAGCATTCGCTGGGGACAGTGATTTGATGCTCCATCACTTGTTGTCAGGCTGTGAGAGTTTAAAGAAGCTTGAGATAAGAGATTGCCCTTTTGGAGACACTGCACTACTGGAGAACGCTGCCAAACTAGAAACCATGCGATCCCTTTGGATGTCGTCATGCTTTGTAAGTTTTGGTGCTTGCAAGCTTCTGAGTCAGAAAATGCCAAGGCTCAATGTCGAAGTCATTGATGAACAT---CCTCCAGAGACAAGACCTGAAAGCTCTCCAGTTGAAAGGATATACATATATAGAACAGTTGCAGGACCGAGAATGGATACGCCTGAATTCGTGTGGACGATACACAAG---AATCCTGAGATTGGAGTTTCACATTTAGCCATAAAG------------------------TAA
	Camelina_sativa_Csa02g007570                        ---------------ATGGCTCTCCGGTTACCATCTAAGGTTTTAAAACATATCCTCTCCTTCATTGATTCCAACGAGGACCGTAACTCTGTTTCTCTGGTCTGCAAGTCATGGTTCGAAACAGAGCGTAAAACTAGGAAACGTGTCTTTGTCGGAAACTGTTACGCGGTGACCCCTGCTGCTGTTGCACGACGGTTCCCAGCGATGAGATCTCTGACTTTGAAAGGGAAGCCACACTTCGCCGACTATAACTTGGTTCCTGATGGTTGGGGTGGTTACGCTTGCCCCTGGATTGAATCCATGGCGGCTAAAAGCCCGTACCTTGAAGAGATAAGGTTGAAGAGGATGGTTGTGACTGATGATTGCTTAGAAAGGATCGCTGCTTCGTTTAAGAATTTCAAAGTCCTTGTGTTGACTTCTTGTGAAGGTTTCTCCACTGATGGTATCGCTGCTATTGCATCAACTTGCAGAAACTTGAGAGTGTTGGAACTACGAGAGTGCATCGTTGAAGATCTAGGAGGAGATTGGCTTAGTTATTTCCCAGAGACTTCAACATCTCTGGTCTCTCTTGACTTCTCTTGTTTAGACTCTGAGGTTAAAATCTCCGACTTAGAGCGTCTCGTGAGCAGATCTCCGAACCTGAAGTCTCTGAAGTTGAATCCAGCTGTGACTCTTGATGGGCTCGTTAGCATACTTCGTCGTGCTCCACAGCTGACTGAGCTCGGCACAGGTTCTTTCGCTGCTGAACTGAAACCAGAAGCGTTTACAAAGTTATCAAAAGCTTTTTCAAACTGTAAGCAACTTCAGAGTTTATCTGGTCTTTGGGATGTTCTCCCTGAATATCTTCCAGCTCTTTATTCTGTTTGTCCTGGTCTTACCTCGTTGAACTTGAGCTATGCTACTGTCCGAATGCCTGATCTTGTTGAGCTTCTTAGGCGATGCTCGAAACTACAGAAGCTATGGGTGATGGACTTGATAGAGGACAAAGGTCTTGAAGCTGTTGCCTCCTACTGTAAGGAACTTCGAGAACTGAGGGTGTTTCCATCTGAGCCAGAT---CTTGATGCAACCAACATACCTGTGACGGAACAAGGCCTGGTCTATGTGTCTAAAGGCTGTCGAAAGCTTGAGTCTGTTCTCTACTTCTGTGTCCAGTTCACAAACGCAGCTTTGATCACTATAGCAAGAAAACGTCCGAATCTCAAGTGCTTCCGTCTCTGCGTGATAGAGCCATTCGCTCCTGATTACAAAACAAATGAGCCACTTGATAAAGGATTCAAAGCCATAGCTGAGGGATGCAAGGATCTTCGACGGCTCTCAGTCTCTGGTCTCCTCTCTGACAAGGCCTTTAAATACATTGGGAAACATGCCAAGAAGGTTAGGATGCTATCAATAGCATTCGCTGGGGACAGTGATCTGATGCTCCATCACTTGTTGTCAGGCTGTGAGAGTTTAAAGAAGCTTGAGATAAGAGATTGCCCTTTTGGAGACACTGCACTACTGGAGAACGCTGCCAAACTAGAGACCATGCGATCCCTTTGGATGTCGTCGTGCTTTGTGAGTTTTGGTGCTTGCAAGCTTCTGAGTCAGAAAATGCCAAGGCTCAATGTCGAAGTCATTGATGAACAT---CCTCCAAAGACAAGACCTGAGAGCTCTCCAGTTGAAAGGATATACATATATAGAACAGTCGCCGGACCGAGAATGGATACGCCTGAATTTGTGTGGACGCTACACAAG---AATCCCGAGATTGGAGTTTCAAAATTAGCCATAAAG------------------------TAA
	Camelina_sativa_Csa08g050130                        ---------------ATGGCTCTCCGATTACCATCTAAGGTCTTAAAACATATCCTCTCCTTCATTGATTCCAACGAGGACCGTAACTCTGTTTCTTTGGTCTGCAAGTCATGGTTCGAAACAGAGCGTAAAACTAGGAAACGTGTCTTCGTCGGAAACTGTTACGCGGTGAGTCCTGCTGCTGTTGCACGACGGTTCCCGGAGATGAGATCTCTGACTTTGAAAGGGAAGCCACACTTCGCCGACTATAACTTGGTTCCTGATGGTTGGGGTGGTTATGCTTGCCCATGGGTTGAAGCCATGGCGGCTAAAAGCCCCTCCCTTGAAGAGATAAGGTTGAAGAGGATGGTGGTGACTGATGAGTGCTTAGAAAGGATTGCAGCTTCGTTTAAGGATTTCAAAGTCCTTGTGTTGACTTCATGTGAAGGTTTCTCCACTGATGGTATCGCTGCTATTGCATCAACTTGCAG?????????????????????????????????????????????????????????????????????????????????????TCTCTGGTCTCTCTTGACTTCTCTTGTTTAGACTCTGAGGTTAAAATCTCGGACTTAGAGCGTCTCGTGAGCAGATCTCCAAACCTGAAGTCTCTGAAGTTGAATCCAGCTGTAACTCTTGATGGTCTCGTTAGCATACTTCGTCGTGCTCCACAGCTGACTGAGCTCGGCACAGGTTCTTTCGCGGCTGAACTGAAACCAGAAGCGTTTACAAAGTTATCAAAAGCTTTTTCAAACTGTAAGCAACTTCAGAGTTTATCTGGTCTTTGGGATGTTCTCCCTGAATATCTTCCAGCTCTTTATTCTGTATGTCCTGGTCTTACCTCGTTGAACTTGAGCTATGCTACTGTCCGGATGCCTGATCTTGTTGAGCTTCTTAGGCGATGCTCGAAACTGCAGAAGCTATGGGTGATGGACTTGATTGAGGACAAAGGTCTTGAAGCTGTTGCCTCCTACTGTAAGGAACTTCGAGAACTGAGGGTGTTTCCATCTGAGCCAGAT---CTTGATGCAACCAACATACCTGTGACGGAACAAGGCCTGGTCTATGTGTCTAAAGGCTGTCGAAAGCTTGAGTCTGTTCTCTACTTCTGTGTCCAGTTCACAAACGCAGCTTTGATTACTATAGCAAGAAAACGTCCGAATCTCAAGTGCTTCCGTCTCTGTGTGATAGAGCCATTCGCTCCTGATTACAAAACAAATGAGCCACTTGATAAAGGATTCAAAGCCATAGCTGAGGGATGCAAGGATCTTCGACGGCTCTCAGTCTCTGGTCTCCTCTCTGACAAGGCCTTTAAATACATTGGGAAACATGCCAAGAAGGTTAGGATGCTATCAATAGCATTCGCTGGGGACAGTGATCTGATGCTCCATCACTTGTTGTCAGGCTGTGAGAGTTTAAAGAAGCTTGAGATAAGAGATTGCCCTTTTGGCGACACTGCACTACTGGAGAACGCTGCCAAACTAGAGACCATGCGATCCCTTTGGATGTCGTCGTGCTTTGTAAGTTTTGGTGCTTGCAAGCTTCTGAGTCAGAAAATGCCAAGGCTCAATGTCGAAGTCATTGATGAACAT---CCTCCAAAGACAAGACCTGAGAGCTCTCCAGTTGAAAGGATATACATATATAGAACAGTCGCCGGACCGAGGATGGATACGCCTGAATTTGTGTGGACGCTACACAAG---AATCCTGAGATTGGAGTTTCAAAATTAGCCATAAAG------------------------TAA
	Camelina_sativa_Csa13g054330                        ---------------ATGGCTCTCCGATTACCATCTAAGGTTTTAAAACATATCCTCTCCTTCATTGATTCCAACGAGGACCGGAACTCAGTTTCTCTGGTCTGCAAGTCATGGTTCGAAACAGAGCGTAAAACTAGGAAACGGGTCTTTGTCGGAAACTGTTACGCGGTGACCCCTGCTGCTGTTGCACGACGGTTCCCGGAGATGAGATCTCTGACTTTGAAAGGGAAGCCACACTTCGCCGACTATAATTTGGTTCCTGATGGTTGGGGTGGTTATGCTTGCCCATGGATTGAAGCCATGGCGGCTAAAAGCCCGTCCCTTGAAGAGATAAGATTGAAGAGGATGGTGGTGACTGATGAGTGCTTAGAAAGGATCGCTGCTTCGTTTAAGGATTTCAAAGTCCTTGTGTTGACTTCTTGTGAAGGTTTCTCCACTGATGGTATCGCTGCTATTGCATCAACTTGCAGAAACTTGAGAGTGTTGGAACTACGAGAGTGCATCGTTGAAGATCTGGGAGGAGACTGGCTTAGTTATTTCCCAGAGACTTCAACATCTCTGGTCTCTCTTGACTTCTCTTGTTTAGACTCTGAGGTTAAAATCTCAGACTTAGAGCGTCTCGTGAGCAGATCTCCAAACCTGAAGTCTCTGAAGTTGAATCCAGCGGTGACTCTTGATGGTCTCGTTAGCATACTTCGTCGTGCTCCACAGCTGACTGAGCTCGGGACAGGTTCTTTCGCGGCTGAACTGAAACCAGAAGCGTTTACAAAGTTATCAAAAGCTTTTTCAAACTGTAAGCAACTTCAGAGTTTATCTGGTCTTTGGGATGTTCTCCCTGAATATCTTCCAGCTCTTTATTCTGTTTGTCCTGGGCTTACCTCGTTGAACTTGAGCTATGCTACTGTCCGAATGCCTGATCTTGTTGAGCTTCTTAGGCGATGCTCGAAACTGCAGAAGCTATGGGTGATGGACTTGATTGAGGACAAAGGTCTTGAAGCTGTTGCCTCCTATTGTAAGGAACTGCGAGAATTGAGGGTGTTTCCATCTGAGCCAGAT---CTTGATGCAACCAACATACCTGTGACGGAACAAGGCCTGGTCTATGTGTCTAAAGGCTGTCGAAAGCTTGAGTCTGTTCTCTACTTCTGTGTCCAGTTCACAAATGCAGCTTTGATTACTATAGCAAGAAAACGTCCGAATCTCAAGTGCTTCCGTCTCTGCGTGATAGAGCCATTCGCTCCTGATTACAAAACAAATGAGCCACTTGATAAAGGATTCAAAGCCATAGCTGAGGGATGCAAGGATCTTCGACGGCTCTCAGTCTCTGGTCTCCTCTCTGACAAGGCCTTTAAATACATTGGGAAACATGCCAAGAAGGTTAGGATGCTATCAATAGCATTCGCTGGGGACAGTGATCTGATGCTCCATCACTTGTTGTCAGGCTGTCAGAGTTTAAAGAAGCTTGAGATAAGAGATTGCCCTTTTGGAGACACTGCACTACTGGAGAACGCTGCCAAACTAGAAACCATGCGATCCCTTTGGATGTCGTCGTGCTTTGTGAGTTTTGGTGCTTGCAAGCTTCTGAGTCAGAAAATGCCAAGGCTCAATGTCGAAGTCATTGATGAACAT---CCTCCAAAGACAAGACCTGAGAGCTCTCCAGTTGAAAGGATATACATATATAGAACAGTCGCCGGACCGAGAATGGATACGCCTGAATTTGTGTGGACGCTACACAAG---AATCCCGAGATTGGAGTTTCAAAATTAGCCATAAAG------------------------TAA
    Camelina_hispida_AFB1                               ---------------ATGGCTCTCCGATTACCACCTAAGGTTTTAAAACATATCCTCTCCTTCATTGATTCCAACGAGGACCGTAACTCAGTTTCTCTGGTCTGCAAGTCATGGTTCGAAACAGAGCGTAAAACTAGGAAACGTGTCTTTGTCGGAAACTGTTACGCGGTGACCCCTGCTGCTGTTGCACGACGGTTCCCAGCGATGAGATCTCTGACTTTGAAAGGGAAGCCACACTTCGCCGACTATAACTTGGTTCCTGATGGTTGGGGTGGTTATGCTTGCCCATGGATTGAATCCATGGCGGCTAAAAGCCCGTATCTTGAAGAGATAAGGTTGAAGAGGATGGTTGTGACTGATGATTGCTTAGAAAGGATCGCTGCTTCGTTTAAGAATTTCAAAGTCCTTGTGTTGACTTCTTGTGAAGGTTTCTCCACTGATGGTATCGCTGCTATTGCATCAACTTGCAGAAACTTGAGAGTGTTGGAACTACGAGAGTGCATCGTTGAAGATCTAGGAGGAGATTGGCTTAGTTATTTCCCAGAGACTTCAACTTCTCTGGTCTCTCTTGACTTCTCTTGTTTAGATTCTGAGGTTAAAATCTCAGACTTAGAGCGTCTCGTGAGCAGATCTCCAAACCTGAAGTCTCTGAAGTTGAATCCAGCTGTGACTCTTGATGGTCTCGTTAGCATACTTCGTCGTGCTCCTCATCTGACTGAGCTCGGCACAGGTTCTTTTGCGGCTGAACTGAAACCAGAAGCGTTTACAAAATTATCAAAGGCTTTTTCAAACTGTAAGCAACTTCAGAGCTTATCTGGTCTTTGGGATGTTCTCCCTGAATATCTTCCAGCTCTTTATTCTGTTTGTCCTGGTCTTACCTCTTTGAACTTGAGCTATGCTACTGTCCGGATGCCTGATCTTGTTGAGCTTCTTAGGCGATGCTCGAAACTGCAGAAGCTATGGGTGATGGACTTGATTGAGGACAAAGGTCTTGAAGCTGTTGCCTCCTACTGTAAGGAACTTCGAGAACTGAGGGTGTTTCCATCTGAGCCAGAT---CTTGATGCAACCAACATACCTGTGACGGAACAAGGCCTGGTCTATGTGTCTAAAGGCTGTCGAAAGCTTGAGTCTGTTCTCTACTTCTGTGTCCAGTTCACAAATGCAGCTTTGATTACTATAGCAAGAAAACGTCCGAATCTCAAGTGCTTCCGTCTCTGTGTGATAGAGCCATTCGCTCCTGATTATAAAACAAATGAGCCACTTGATAAAGGATTCAAAGCCATAGCTGAGGGATGCAAGGATCTTCGACGGCTCTCGGTCTCTGGTCTCCTCTCTGACAAGGCCTTTAAATACATAGGGAAACACGCCAAGAAGGTTAGGATGCTATCAATAGCATTCGCTGGGGACAGTGATCTGATGCTCCATCACTTGTTGTCAGGCTGTGAGAGTTTAAAGAAGCTTGAGATAAGAGATTGCCCTTTTGGAGACACTGCACTACTGGAGAACGCTGCCAAACTAGAGACCATGCGATCCCTTTGGATGTCGTCGTGCTTTGTGAGTTTTGGTGCTTGCAAGCTTCTGAGTCAGAAAATGCCAAGGCTCAATGTCGAAGTCATTGATGAACAT---CCTCCAAAGACAAGACCTGAGAGCTCTCCAGTTGAAAGGATATACATATATAGAACAGTCGCCGGACCGAGAATGGATACCCCTGAATTTGTGTGGACGCTACACAAG---AATCCCGAGATTGGAGTTTCAAAATTAGCCATAAAG------------------------TAA
    Camelina_rumelica_AFB1                              ---------------ATGGCTCTCCGGTTACCATCTAAGGTCTTAAAACATATCCTCTCCTTCATTGATTCCAACGAGGACCGTAACTCTGTTTCTTTGGTCTGCAAGTCATGGTTCGAAACAGAGCGTAAAACTAGGAAACGTGTCTTCGTCGGAAACTGTTACGCGGTGAGTCCTGCTGCTGTTGCACGACGGTTCCCAAAGATGAGATCTCTGACTTTGAAAGGGAAGCCACACTTCGCCGACTATAACTTGGTTCCTGATGGTTGGGGTGGTTATGCTTGCCCATGGGTTGAAGCCATGGCGGCTAAAAGCCCCTCCCTTGAAGAGATAAGGTTGAAGAGGATGGTGGTGACTGATGAGTGCTTAGAAAGGATCGCTGCTTCGTTTAAGGATTTCAAAGTCCTTGTGTTGACTTCTTGTGAAGGTTTCTCCACTGATGGTAGCGCTACTATTGTATCAACTTGCAGAAACTTGAGAGTGTTGGAACTACGAGAGTGCATCGTTGAAGATCTAGGAGGAGATTGGCTTAGTTATTTCCCAGAGACTTCAACTTCTCTGGTCTCTCTTGACTTCTCTTGTTTAGACTCTGAGGTTAAAATCTCGGACTTAGAGCGTCTCGTGAGCAGATCTCCAAACCTGAAGTCTCTGAAGTTGAATCCAGCTGTGACTCTTGATGGTCTCGTTAGCATACTTCGTCGTGCTCCACAGCTGACTGAGCTCGGCACAGGTTCTTTCGCGGCTGAACTGAAACCAGAAGAGTTTACAAAGTTATCAAAAGCTTTTTCGAACTGTAAGCAGCTTCAGAGCTTATCTGGTCTTTGGGATGTTCTCCCCGAATATCTTCCAGCTCTTTATTCTGTATGTCCTGGTCTTACCTCGTTGAACTTGAGCTATGCTACTGTCCGGATGCCTGATCTTGTTGAGCTTCTTAGGCGATGCTCGAAACTGCAGAAGCTATGGGTGATGGACTTGATTGAGGACAAAGGTCTTGAAGCTGTTGCCTCCTACTGTAAGGAACTTCGAGAACTGAGGGTGTTTCCATCTGAGCCAGAT---CTTGATGCAACCAACATACCTGTGACGGAACAAGGCCTGGTCTATGTGTCTAGAGGCTGTCGAAAGCTTGAGTCTGTTCTCTACTTCTGTGTCCAGTTCACAAACGCAGCTTTGATTACCATAGCAAGAAAACGTCCGAATCTCAAGTGCTTCCGTCTCTGTGTGATAGAGCCATTTGCTCCTGATTACAAAACAAATGAGCCACTTGATAAAGGATTCAAAGCCATAGCTGAGGGATGCAAGGATCTTCGACGGCTCTCAGTCTCTGGTCTCCTCTCTGACAAGGCCTTTAAATACATTGGGAAACATGCCAAGAAGGTTAGGATGCTATCAATAGCATTCGCTGGGGACAGTGATCTGATGCTCCATCACTTGTTGTCAGGCTGTGAGAGTTTAAAGAAGCTTGAGATAAGAGATTGCCCTTTTGGAGACACTGCACTACTGGAGAACGCTGCCAAACTAGAGACCATGCGATCCCTTTGGATGTCGTCGTGCTTTGTAAGTTTTGGTGCTTGCAAGCTTCTGAGTCAGAAAATGCCAAGGCTCAATGTCGAAGTCATTGATGAACAT---CCTCCAAAGACAAGACCTGAGAGCTCTCCAGTTGAAAGGATATACATATATAGAACAGTCGCCGGACCGAGAATGGATACGCCTGAATTTGTGTGGACGCTACACAAG---AATCCTGAGATTGGAGTTTCAAAATTAGCCATAAAG------------------------TAA
    Camelina_laxa_AFB1                                  ---------------ATGGCTCTCCGATTACCATCTAAGGTTTTAAAACATATCCTCTCCTTCATTGATTGCAACGAGGACAGGAACTCTGTTTCTTTGGTCTGCAAGTCATGGTTCGAAACAGAGCGTAAAACTAGGAAACGGGTCTTTGTCGGAAACTGTTACGCGGTGAGTCCTGCTGCTGTTGCACGACGGTTCCCGGAGATGAGATCTCTGACTTTGAAAGGGAAGCCACACTTCGCTGACTATAACTTGGTTCCTGATGGTTGGGGTGGTTATGCTTGCCCATGGGTTGAAGCCATGGCGGCTAAAAGCCCCTCCCTTGAAGAGATAAGATTGAAGAGGATGGTGGTGACTGATGAGTGCTTAGAAAGGATCGCTGCTTCGTTTAAGAATTTCAAAGTCCTTGTGTTGACTTCTTGTGAAGGTTTCTCCACTGATGGTATCGCTGCTATTGTATCAACTTGCAGAAAGTTGACAGTGTTGGAACTACGAGAGTGCATCGTTGAAGATCTAGGAGGAGATTGGCTTAGTTATTTCCCAGAGACTTCAACTTCTCTGGTCTCTCTTGACTTCTCTTGTTTAGACTCTGAGGTTAAAATCTCAGACTTAGAGCGTCTCGTGAGCAGATCTCCAAACCTGAAGTCTCTGAAGTTGAATCCAGCTGTGACTCTTGATGGGCTCGTTAGCATACTTCGTCGTGCTCCACAGCTAACTGAGCTCGGCACAGGTTCTTTCGCGGCTGAATTGAAACCAGAAGCGTTTACAAAGTTATCAAAAGCTTTTTCAAACTGTAAGCAACTTCAGAGCTTATCTGGTCTTTGGGATGTTCTCCCTGAATATCTTCCAGCTCTTTATTCTGTATGTCCTGGTCTTACCTCGTTGAACTTGAGCTATGCTACTGTCCGGATGCCTGATCTTGTTGAGCTTCTTAGGCGATGCTCGAAACTGCAGAAGCTATGGGTGATGGACTTGATTGAGGACAAAGGTCTTGAAGCTGTTGCGTCCTATTGTAAGGAACTGCGAGAACTGAGGGTCTTTCCATCTGAGCCAGAT---CTTGATGCAACCAACATACCAGTGACGGAACAAGGCCTGGTCTATGTGTCTAAAGGCTGTCGAAAGCTTGAGTCTGTTCTCTACTTCTGTGTCCAGTTCACAAACGCAGCTTTGATTACTATAGCAAGAAAACGTCCGAATCTCAAGTGCTTCCGTCTCTGCGTGATAGAGCCATTTGCTCCTGATTACAAAACAAATGAGCCACTTGATAAAGGATTTAAAGCCATAGCTGAGGGATGCAAGGATCTTCGACGGCTCTCCGTGTCTGGTCTCCTCTCTGACAAGGCCTTTAAATACATTGGGAAACATGCCAAGAAGGTTAGGATGCTATCAATAGCATTCGCTGGGGACAGTGATCTGATGCTCCATCACTTGTTGTCAGGCTGTGAGAGTTTAAAGAAGCTTGAGATAAGAGATTGCCCTTTTGGAGACACTGCACTACTGGAGAACGCTGCCAAACTAGAGACCATGCGATCCCTTTGGATGTCGTCGTGCTTTGTAAGTTTTGGTGCTTGCAAGCTTCTGAGTCAGAAAATGCCAAGGCTCAATGTCGAAGTCATTGATGAACAT---CCTCCAAAGACAAGACCTGAGAGCTCTCCAGTTGAAAGGATATACATATATAGAACAGTCGCCGGACCGAGAATGGATACGCCTGAATTTGTGTGGACGCTACACAAG---AATCCCGAGATTGGAGTTTCACGATTAGCCATAAAG------------------------TAA
	Capsella_rubella_0006s3387                          ---------------ATGGCTCTCCGATTACCATCTAAGGTTCTTGAACATATCCTCTCCTTCATTGATTCCAACGAGGACCGGAACTCTGTTTCTCTGGTCTGCAAGTCATGGTTCGAAACAGAGCGGAAGACTAGGAAGCGAGTCTTTGTCGGAAACTGTTACGCGGTGAGTCCTGCTGCTGTTGCACGACGGTTCCCGGAGATGAGATCTCTGACTTTGAAAGGGAAGCCACACTTCGCCGACTATAATTTGGTTCCGGACGGTTGGGGTGGTTATGCTTGTCCATGGGTTGATGCCCTGGCGGCGAAAAGCCCGTCCCTTGAAGAGATAAGATTGAAGAGAATGGTGGTGACTGATGAGTGCTTAGAAAAGATTGCTGCTTCGTTTAAGGATTTTAAAGTCCTTGTGCTGACTTCTTGTGAAGGTTTCTCCACTGATGGTATCGCTGCTATTGCATCTACTTGCAGAAACTTGAGAGTGTTGGAGCTACGAGAGTGCATCGTTGAAGATCTAGGAGGAGATTGGCTTAGTTATTTCCCAAAGACTTCAACTTCTCTGGTCTCTCTTGACTTCTCTTGTTTAGACTCTGAGGTTAAAATCTCGGACTTAGAGCGTCTCGTGAGCAGATCTCCTAACCTGAAGTCTCTGAAGTTGAATCCAGCTGTGACTCTTGATGGACTCGTTAGCATCCTTAGTCGTGCTCCACAGCTGACTGAGCTCGGCACAGGTTCTTTCGCAGCTGAATTGAAACCAGAAGCGTTTTCAAAGTTGTCAAAAGCTTTTTCAAACTGTAAGCAACTTCAGAGTTTATCTGGTCTTTGGGATGTTCTCCCTGAATATCTTCCAGCTCTTTATTCTGTATGTCCTGGACTTATCTCGTTGAACTTGAGCTATGCTACTGTCCGAATGCCTGATCTTGTTGAGCTTCTTAGGCGATGCTCGAAACTGCAGAAGCTATGGGTGATGGACTTGATAGAGGACAAAGGTCTTGAAGCTGTTGCCACATATTGTAAGGAACTGCGAGAACTGAGGGTGTTTCCATCAGAGCCAGAT---CTTGATGCAACCAACATACCTGTGACGGAGCAAGGCCTGGTCTATGTCTCTAAAGGCTGTCGGAAGCTTGAGTCTGTTCTTTACTTCTGTGTCCAGTTCACAAACGCAGCTTTGATTACTATAGCAAGAAAACGTCCAAATCTGAAGTGCTTCCGTCTCTGCGTGATAGAGCCATTCGCTCCTGATTACAAAACAAATGAGCCACTTGATAAAGGATTCAAAGCCATAGCTGAGGGATGCAAGGATCTTCGACGGCTCTCCGTCTCTGGTCTCCTCTCTGACAAGGCCTTTAAATACATTGGGAAACATGCCAAGAAGGTTAGGATGCTATCCATAGCATTCGCAGGCGACAGTGATTTGATGCTCCATCACTTGTTGTCAGGCTGTGAGAGTTTAAAGAAGCTTGAGATAAGAGACTGCCCTTTTGGAGACACTGCACTACTAGAGAACGCTGCCAAACTAGAAACCATGCGATCCCTTTGGATGTCGTCGTGCTTTGTAAGTTTTGGCGCTTGCAAGCTTCTGAGTCAGAAAATGCCAAGGCTTAATGTTGAAGTCATTGATGAACAT---CCTCCAAAGACAAGACCTGAGAGCTCTCCAGTTGAAAGGATATACATATATAGAACAGTCGCAGGACCGAGAATGGATACACCTGAATTCGTGTGGACGCTACACAAG---AATCCTGAGATTGGAGTTTCTCGTTTAGCCATTAAG------------------------TAA
	Leavenworthia_alabamica_KE158463_62K                ---------------ATGAATCTCAGATTACCATCTAAGGTTCTTGAGCATATCATCTCCTTCATTGATTCCAATGAGGACAGGAACTCAGTTTCTTTGGTTTGTAAGTCATGGTTTGAGACAGAGAGGAAAACTAGGAAACGAGTCTTTGTTGGAAACTGTTATGCTATAAGTCCTGATGCTGTTGCAAGAAGGTTTCCAGAGATGAGATCTTTGACTTTGAAAGGGAAGCCACACTTTGCTGATTATAATTTGGTTCCTGATGGTTGGGGTGGTTATGCTTGGCCTTGGATTGAAGCCATGGCTAAGAAAAGTCCTTCACTTGATGAGATAAGATTGAAAAGAATGGTTGTAACTGATGAGTGCTTAGAGTTGATTGCTGCTTCGTTTAAGGATTTTAAAGTTCTTGTGTTGACTTCTTGTGAAGGTTTCTCAACTGATGGTATAGCTGCTATTGCAGCTACTTGCAGGAACTTGAGAGTGTTGGAACTACGAGAGTGTATTGTTGAAGATCTTGGAGGAGACTGGCTTAGTTATTTTCCAGAAACTTCAACTTCTCTGATCTCTCTTGACTTCTCTTGTTTAGATTCAGAAGTTAAACTCTTGGATTTAGAACGTCTTGTGAGTAGAAATCCAAACCTCAAGTCACTTAAGTTGAATCCAGCTGTGACTGTTGATGGACTTGAGAGCATACTTCGTCGTGCTCCACAACTAACTGAGCTTGGTACAGGTTCTTTCTCAGCTGAACTTAAACCAGAAGCGTTTACAAAGTTATCAGAAGCTTTTGCAAATTGTAAGCAACTTAAGTGTTTATCTGGTCTTTGGGATGTTCTTCCTGAGTATCTTCCAGCTCTTTATTCTATCTGTCCTGGTCTTACTTCATTGAACTTGAGCTATGCTACTGTTCGAATGCCTGATCTTGTTGAGCTTCTTCGTCGATGCTCGAAGTTGCAGAAGCTATGGGTAATGGACTTGATAGAAGACAAAGGTCTTGAAACTGTTGCTTCTTGTTGCAAGGAACTCCGAGAACTGAGAGTGTTTCCATCTGTACCAGAT---CTAGATGCAACAAACGTAGCTCTAACAGAACAAGGTTTGGTCTTTGTGTCTCAAGGTTGTCCAAAGCTTGAATCTGTTCTCTACTTCTGTGTCCAGTTCACAAACGCAGCTTTGATTACCATAGCAAGAAACCGTCCGAATATCAAGTGTTTCCGTCTCTGTGTAATAGAGCCATTTGCCCCTGATTACAAAACACATGAGCCACTTGATAAAGGATTCAAAGCCATAGCTGAGCGATGCAAGGATCTGCGAAGACTCTCTGTCTCTGGTCTACTCACTGACAAAGCCTTTAAATACATTGCAAAACATGCCAAGAAGGTTACAATGCTATCAGTTGCATTTGCTGGAGATAGTGATTTGATGCTTCATCACTTATTATCAGGCTGTGAGAGTTTAAAGAAGCTTGAGATAAGAGATTGTCCTTTTGGAGACACTGCACTACTGGAAAACGCTTCGAAACTAGAAACCATGCGATCCCTTTGGTTATCATCTTGCTTTGTAAGTTTTGGTGCTTGCAAGCTTCTGAGTCAGAAAATGCCAAGGCTTAATGTTGAAGTCATTGATGAACAT---CCTCCAGAGACAAGACCTGAGAGTTCTCCAGTTGAGAGGATATACATATACAGAACAGTTGCAGGACCAAGACTGGATATGCCTGAGTTTGTGTGGACAATACACAAG---AATCCAGAGATCGGAGTTTCACATCTAGCTATAAAG------------------------TAA
	Brassica_rapa_C02768                                ---------------ATGGATCTCCGATTACCATCTAAGGTTCTTGAGCATATCCTCTCCTTCGTCGACTCCAACGAGGATCGAAACTCTGTTTCTCTGGTCTGCAAGTCATGGTTCGAGACCGAGCGGCGAACTAGGAAACGTGTCATTGTCAGAAACTGTTACGCGGTTACCCCTGAGGCGGTTGCACGGCGGTTCCCGGAGATGAGGTCTCTGACTCTGAAAGGGAAGCCTCACTTCGCTGACTACAACTTGGTTCCTGACGGTTGGGGTGGTTATGCTTGGCCGTGGATTGAGGCTATGGCGGCGAAATGCCCGTCTCTTGAAGAGTTGAGGTTGAAGAGAATGGTGGTGACTGATGAGTGCTTGGAGAAGATTGCTGCTTCGTTTAAGGATTTTAAGGTTCTTGTGTTGACTTCTTGTGAAGGTTTCTCTACTGATGGTCTTGCAGCCATTGCAGTAGCTTGCAGTAACCTCAGAGAGCTGGAATTGCGAGAGTGCATAGTTGAAGATCTTGGAGGAGACTGGCTTAGCTATTTCCCAGAGACTTTGACTTCTCTCGTCTCTCTTGACTTCTCTTGTTTAGACTCAGAGGTTAAACTGTCAGACTTAGAGCGTCTCGTGAGCAGATCTCCAAACCTCAAGTCTCTCAAGCTGAATCGAGCTGTGAGTCTAGACGCTCTCGGGAGCTTGCTTCGTCTAGCTCCACAGCTGGTTGAGCTCGGCACAGGTTCTTTCTCAGATAAGCTAGATCAAGAAGCGGTTTCAAAGTTATCACAAGCATTTTCAGAGATGAAGGAGCTTAAGAGCTTGTCTGGTCTTTGGGATGTCCTCCCTGAGTATATTCCACTTCTTTACTCTGTTTGTCCTGGTCTTACCTCGTTGAACTTGAGCTATGCTACTGTCCAAATGCCTGATCTTGTCGAGCTTCTTACTCGATGCTCCAACTTGCAGAAGCTATGGGTAATGGACTTGATAGAGGACAAAGGTCTCCAAGTTGTTGCCTCGTCTTGTAAGGAACTGCGAGAACTAAGGGTGTTTCCATCTGGAGCAGAAGGTCTTAACGATACAAATGTAGCTATGACTGAACAAGGTCTGGTCTCCGTGTCTGAAGGCTGTCCAAATCTCGAGTCTGTTCTCTACTTCTGTGTCCAGTTTACAAACGCAGCTATGGTTACCATAGCAAGAAACCGTCCAAATCTCAAATGCTTCCGCCTCTGTGTAATGGAGCCATTTGCTCCTGATCACAAAACACAGAAGCCACTTGATGAAGGATTCAAAGCCATAGCTGAAAGATGCAAGGATCTTCAACGCCTCTCTGTCTCTGGTCTCCTCACTGACAAGGCCTTTGAATACATTGGGACACATGGCAAGAAGCTTAGGATGCTATCAATAGCATTTGCTGGGGACAGTGACTTGATGCTACACCACTTGTTGTCAGGCTGTGAGAGTTTAAACAAGCTTGAGATTAGGGATTGCCCTTTTGGAGACACTGCTTTACTGGAGAACGCGGCGAAACTAGAAACCATGCGGTCCCTTTGGATGTCATCTTGCTGCGTTAGTTTTGGTGCTTGCAAGCTCCTGAGTCAAAAAATGCCAAAGCTAAATGTTGAAGTCATTGATGAACAT---CCTCTAGAGACAAGACCTGACAGCTCTCCAGTTGAGAGGATATACATATACAGGACACTCGCAGGACCGAGATTGGACATGCCTGAATTTGTGTGGACAATACAAAAA---AATCCAGAGATTGGTGTTTCACATCTAGCCATAAAG------------------------TAA
	Brassica_rapa_I00210                                ---------------ATGGATCGGCGATTCCCATTTAAAGTTCTTGAGCATATCTTCTCCTTCGTTGACTCCAACGAGGACCGGAACTCTGTTTCTCTGGTGTGCAAGTCGTGGTTCGAGACAGAGCGGCGGACTAGAAAACGTGTCTTTGTCGGAAACTGCTACGCGGTTAGTCCTCTGAAGGTTGCACGGCGGTTCCCGAAGATGAGGTCTCTGACGCTTAAAGGGAAGCCACACTTCGCCGACTACAACTTGGTTCCTGACGGTTGGGGTGGCTATGCATGGCCGTGGATTGAGGCTATGGCGGCGAGGAGACCGTTGCTTGAAGAGATCAGGTTGAAGAGGATGGTGGTGACTGATGAGTGCTTGGAGAAGATCGCTGCTTCGTTTAGAGATTTTAAAACACTTGTGTTGACTTCTTGTGAGGGTTTCTCTACGGATGGTATTGCAGCCATTGCATCAACTTGCAGAAAACTGAGAGACCTGGAACTGCGGGAGTGCATAGTTGATGACCTTGGAGGAGACTGGCTTAGCTACTTCCCTGAAACTTCGACTTCTCTCGTCTCTCTAGACTTCTCTTGTTTGGACTCAGAGGTTAAACTCTCGGACTTGGAGCGTCTCCTAAGCAGGTCTCCAAACCTCAAGTCTCTCAAGCTGAATCGATCCGTGACACTAGACGTTCTCGAGAGCTTACTCCGTCGAGCTCCACAGCTTGTTGAGCTTGGCACAGGTTCTTTCTCAGATGAGCTGGATCCAGAAGAGATTGCAAAGTTAACAAAAGCTTTGTCAGAGTTGAAGCAACTTAAGAGCTTATCTGGTCTTTGGGATCTCCTCCCTGAGTATATTCCACTTCTTTACTCTGTTTGTCCTCGTCTTACCTCATTGAACCTGAGCTATGCTACTGTCCAAATGCCTGACCTTATCGACCTTCTTAGTCGATGTTCGAAACTGCAGAAGCTATGGGTAATGGACTTGATAGAGGACAAGGGTCTCAAAACCGTTGCCTTGTGTTGCAAGGAACTGAGAGAACTAAGGGTGTTTCCATCAGGAGCAGAT---CTAGATGAAACAGACGTGACTCTCACGGAACAAGGTCTTGTCTCTGTGTCTGAAGGCTGTAAAAAGCTTGAATCAGTTCTCTACTTCTGCGTCCAGTTCACAAACGCAGCTTTGGTCTCCATCGCAAAGAACCGTCCAAACTTCAGATGCTTCCGCCTCTGCGTGATGGAGCCGTTCGCTCCAGACTACCGAACACAGCAGCCACTTGACGAAGGATTCAAAGCCATAGTCGAGAAATGCAAGGATCTTCGAAGACTCTCCGTCTCCGGTCTCCTCACTGACAAGGCCTTTGAGTACATTGGAGTACACGCCAAGAAGCTAAGGATGCTGTCTATAGCATTCGCTGGAGACAGTGATCTAATGCTACACCACTTGCTGTCGGGATGTCAGAGTTTAAAGAAGCTAGAGATAAGAGACTGCCCGTTTGGAGACACCGCGCTGCTCGAGAACGCTGCGAAACTTGAAACCATGCGATCCCTTTGGATGTCTTCTTGCTTTGTGAGTTTTGGTGCTTGCAAGCAGTTGAGTCAGAAGATGCCAAGGCTTAACGTTGAAGTCATCGATGAGCAT---CCTCCAAAGACAAGGCCTGATAGCTCTCCTGTTGAGAGGATATACATATATAGAACAGTCGCGGGACCGAGGTTGGATACGCCTGAGTTTGTGTGGACGATACACAAG---AGCCCTGAGGTTGGTGTTTCACGTCTATCCATACGG------------------------TGA
	Eutrema_salsugineum_10028532m                       ---------------ATGGGTCTCCGATTACCATCAAAGGTTCTTGAGCATATCCTCTCCTTCGTCGATTCCAACGAGGATCGGAACTCAGTTTCTCTGGTCTGCAAGTCATGGTTCGAGACTGAGCGGCGAACTAGGAAACGTGTCTTTGTCGGCAACTGTTACGCGGTCAATCCTGCGGCGGTTGCACGGCGGTTCCCGGAGATGAGATCTCTGACTCTGAAGGGTAAGCCTCACTTCGCCGACTACAATTTGGTTCCTGACGGTTGGGGAGGCTATGCTTGGCCGTGGATTGAGGCTATGGCGGCGAAAAGCCCGTCGCTTGAGGAGATTAGGTTGAAGAGAATGGTGGTGACTGATGAGTGCTTGGAGAAGATTGCTGCTTCGTTTAAGGATTTTAAAGTCCTTGTGTTGACTTCTTGTGAAGGTTTCTCCACTGATGGTCTCGCAGCCATTGCAGCAACTTGCAGAAACCTGAGAGAGCTGGAATTGCGAGAATGCATAGTtgaagatctaggaggAGACTGGCTTAGCTACTTCCCAGAAACGTTGACCTCTCTTGTCTCTCTTGACTTCTCTTGTTTAGACTCGGAGGTTAAACTCTCCGACTTGGAGCGTCTCGTGAGCAGGTGTCCAAACCTCAAGTCTCTCAAGCTGAATCGAGCCGTGACTCTAGACGGACTCGAGAGCTTACTTCGTCGAGCTCCACAGCTGGTTGAGCTTGGCACAGGTTCTTTCTCCGATGAACTGACTCCAGAAGCGCTTTCAAAGTTGAGAAAAGCTTTTGCAGAGTTGAAGCAACTTAAGTGCTTATCTGGTCTTTGGGATGTCCTCCCTGAGTATATTCCGCTTCTTTACTCTGTTTGTCCTGGTCTTACCTCGTTAAACTTGAGCTATGCTACTGTTCAAATGCCTGATCTTGTCGATCTTCTGAGTCGATGCTCGAAATTGCAGAAGCTATGGGTAATGGACTTGATAGAGGACAAAGGTCTCAAAGCTGTTGCCTCGTCTTGTAAGGAACTGCGAGAACTAAGGGTGTTTCCATCTGGAGCAGAT---CTCGATGAAACAAATGTAGCTCTGACGGAGCAAGGTCTGGTCTCTGTGTCGGAAGGCTGTCCAAAGCTTGAATCTGTTCTCTACTTTTGTGTCCAGTTTACAAACGCGGCTTTGGTTACCATCGCAAGAAACCGTCCAAATATCAAATGCTTCCGCCTCTGTGTGATGGAGCCATTTGCTCCTGATTACAGAACACATAAGCCACTCGATGAAGGTTTCAAAGCCATAGTAAAGGGATGCAAGGATCTTCAACGTCTCTCTGTCTCTGGTCTACTCACTGACAAGGCCTTTGAATACATTGGAATATATGCCAAGAAGCTTGGGATGCTATCAATAGCTTTTGCTGGGGACAGTGATTTGATGCTTCATCACTTGTTGTCAGGCTGTGAGAGTTTAAGGAAGCTTGAGATAAGAGATTGCCCTTTTGGAGACGCTGCGCTACTGGAGAACGCTGCGAAACTAGAAACCATGCGATCCCTTTGGATGTCGTCTTGCTTTGTAAGTTTCGATGCTTGCAAGCTCCTGAGTCAGAAAATGCCAAGGCTCAATGTCGAAGTCATTGATGAACAT---CCTCCAGAGACAAGGCCTGAGAGCTCTCCAGTTGAGAGGATATACATATATCGAACACTCGCAGGACCGAGGTTGGATATGCCTGAATTTGTGTGGACAATACACAAG---AATCCCGAAATCGGAGTTTCACATCTAGCCATAAAG------------------------TAA
	Cochlearia_officinalis_CSUV2049375e                 ---------------ATGGATCCTCGCTTACCATCTAAGGTTTTAGAGCATATCTTCTCTTTCGTTGATTCCAACGAAGACAGGAACTCTGTTTCTCTGGTCTGCAAGACTTGGTTTCAGACCGAACAGAGAACTAGGAAACATGTCTTTGTCGGAAACTGTTACGCGGTGAGTCCCGCGACGGTTATAAGGCGGTTCCCGGAGA????????????????????????????????????????????????????????????????????????????????????????????????????????????????????????????????????????????????????????????????????????????????????????????????????????????????????????????????????????????????????????????????????????????????????????????????????????????????????????G????????????????????????????????????????????????????????????????????????????????????????????????????????????????????????????????????????????????????????????????????????????????????????????????????????????????????????????????ACGAATTGGAACCAGAAGCCTTGTCAAAGTTATCAAAAGCTTTTGCAAACTGTAAACAGCTCGAGAGCTTATCTGGTCTTTGGGACATCCTCCCTGAGTATCTTCCTGCTCTTTATTCTGTTTGTCCTGGTCTTACCTCGTTGAACTTGAGCTATGCTACTGTCGGAATGTCTGATCTTGTCAAGCTTCTTAGCAAATGCTCGAAATTGCAGAAGCTATGGGTGATGGACTTGATAGAGGACAAAGGTCTTGAAGTTGTTGCTTCCTGCTGTAAGGAATTACTAGAACTGAGGGTGTTTCCATCTGAACCGGAT---CTCGATGCAGCAAGCGTGGTTCTGACAGAACAAGGTCTGGTTTCTGTGTCTAGAGGCTGCCCAAAGATTGAGTCTATTCTCTACTTCTGTGTCCAGTTCACAAATGCAGCTTTAGTTACCATAGCCAAAAACCGTCCAAATATCAAGTGCTTCCGTCTCTGCGTAATCGAGCCATTTGCTCCTGATTACAAAACCAAAGAGCCACTCGATGAAGGATTCAGAGCCATAGTTGAGAGATGCAAGGATCTTCGACGGCTCTCTGTCTCTGGTCTCCTCACTGACAAAGCCTTTGAATACATTGGGAAACACGCCACGAAGGTTGGGATGCTATCAATAGCATTTGCTGGGGACAGTGATTTGATGCTTCATCACTTGTTGTCAGGCTGTAAGAGTTTAAAGAAGCTTGAGATAAGAGATTGCCCATTTGGAGACACTGCGCTACTGGAGAACGCTTTGAAACTAGAAACCATGCGATCCCTTTGGCTGTCGTCCTGCTTTGTAAGTTTTGGTGCTTGCAAGCTACTGAGTCAAAAAATGCCAAGGCTCAATGTCGAAGTCATTGATGAACAT---CCTCCAGAGACAAGACCAGAGAGCTCCCCAGTTGAGAGGATATACATATATAGAACAGTCGCAGGACCGAGATTGGATATGCCTGAATTTGTGTGGACAATACACAAG---AACCCCGAGGTCGGAGTTTCACAACTAGCCATAAAG------------------------TAA
	Arabis_alpina_Aa_G187670                            ---------------ATGGGTCTTCCATTACCATCTAAGGTCTTGGAACATATACTTTCCTTCATTGATTCTAATGAGGATCGTAACTCTGTTTCTTTGGTGTGCAAGTCATGGTTCGATACAGAACGACGTACTAGAAAACGTGTCTTTGTTGGAAACTGTTACTCGGTGAGTCCTGTAACGGTTTCAAGGCGGTTTCCAAAGATGAGATCTTTGACTTTGAAAGGGAAACCACATTTTGCTGATTACAACTTGGTTCCTGATGGTTGGGGTGGTTATGCTTGGCCTTGGATTGAAGTCTTGGCTAAGAAGAATCCGTTGCTTGAAGAGATTAGATTGAAGAGAATGGTTATTACTGATGAATGTTTGGAGATGATTGCTGCTTCGTTTAAAGAGTTTAAAGCACTTGTGTTGGTTTCTTGTGAAGGTTTTACTACTGATGGTATCGCCGCCATTGCAGCTACTTGCAGAAACTTGGAAGTGTTGGAGTTAAGAGAATGTATAGTTGAAGATCTAGGAGGAGATTGGCTTAGCTATTTCCCTGAGTCTTTAACTTCTTTAGTCTCTCTTGACTTCTCTTGTTTAGACTCTGAGGTTAAGCTCTCTGATTTAGAGCGTCTAGTGAGTAGAAGTCCTAACTTGAAGTCACTAAAGCTGAACCGAGCTGTGACTTTAGAAGGACTTGAGAGTTTACTTCGTAGAGCTCCACAGTTGACTGATCTAGGGACAGGTTCTTTCTCGGCTGAATTCGAACCAGAAATGTTTTCGAAGTTATCGAAAGCTTTTGCTGAGTGTAAGCAACTTAAGAGTTTATCTGGTCTTTGGGATGTTATCCCTGAGTATCTACCAGCTCTTTATTCTGTTTGTCCTGGTCTTACCTCTTTGAACTTGAGCTATGCTACTGTCCGTATGCCTGATCTTGTCGGTATTCTTAGACGATGCTGGAAGTTACAGAAGCTATGGGTAATGGACTTGATAGAGGATAAAGGTCTACAAACTGTGGCTATGCGTTGTAAGGATTTGCGAGAACTGAGGGTGTTTCCATCTGAACCAGAT---CTCGACGATGTGAGTGTTGCTCTGACGGAAGAAGGTCTGGTCACGGTGTCTAGAAGTTGTAGAAAGCTTGAATCTATTCTCTACTTTTGTGTGCAGTTTACAAACGCAGCTTTGGTTACCATATCAAGATACCGTCCCAACATCAAGTGCTTTCGTCTTTGTGTGATAGAGCCATTTGCTCCTGATCACATTACGCGTGAGCCACTTGATGAAGGATTCAGAGCCATAGTTGAGGGATGCAAGGATCTTCGAAGGCTCTCTGTCTCGGGTCTACTCACTGACAAGGCCTTTGAGTACATTGGGAAACATGCCAAGAAGGTTCGGATGCTGTCAATAGCGTTTGCTGGAGATAGTGATTTGATGCTTCACCACTTGTTGTCAGGCTGCGAGGGTTTAAAGAAGCTTGAGATAAGAGATTGTCCTTTTGGAGACAGTGCACTACTTGAGCACGCTGCGAAACTAGAAACCATGCGATCCCTTTGGATGTCGTCTTGCTTTGTAAGTTTTGGTGCTTGCAAGGTTCTGAGTCAGAAACTACCAAAGCTCAATGTCGAAGTCATTGATGAAATGTATCCTCCAGAGTCAAGACCTGAGAACTCTCCAGTTGAAAGGATATACATATACAGAACACTCGCAGGACCGAGATTGGACATGCCTGAGTTTGTGTGGACAATTCACAAG---AATCCCGAGGTCGGAGTTTCAAATCTAGCCATAAAG------------------------TAA
    Thlaspi_arvense_Ta13785                             ---------------ATGGGTCTCCGGTTACCATCCAAGGTTCTGGAGCATATCATCTCCTTCATCGATGCCAACGAGGACCGGAACTCTGTTTCTCTCGTCTGCAAGTCATGGTTCGAGACCGAGAGGCGAACTAGGAGAAAGGTCTTCGTCGGAAACTGTTACGCGGTCACTCCTGCGGCGGTTGCACGGCGGTTCCCGAAGATGAGATCTCTGACTCTGAAGGGTAAGCCTCACTTCGCCGACTACAACTTGGTTCCCGACGGTTGGGGTGGCTATGCTTGGCCGTGGATTGAGGCTATGGCGGCGAAAACCCCGTCGCTTGAGGAGGTACGGTTGAAGAGAATGGTGGTGACTGATGAGTGCTTGGAGAAGATTGCTGCTTCCTTTAAGGATTTTAAAGTCCTTGTGTTGACTTCTTGTGAAGGATTCTCCACTGATGGTCTCGCAGCCATTGCAGCAACTTGCAGAAACCTGAGGGAGCTGGAATTGCGAGAATGCATAGTTGAAGATCTAGGAGGAGACTGGCTTAGCTATTTCCCAGAGACGTTGACTTCTCTTGTCTCTCTTGACTTCTCTTGTTTGGACTCTGAGGTTAAACTCTCGGACTTGGAGCGTCTCGTGAGCAGGTCTCCAAACCTCAAGTCTCTGAAGCTGAACCGAGCCGTGGCTCTAGACGGACTCGAGAGCTTACTTCGTCGAGCTCCACAGCTGGTTGAGCTTGGCACAGGTTCTTTCTCAGATGACCTGGATCAAGAAGCGCTTTCAAAGTTAGCTAAAGCTTTTGCAGCGTTGAAGCAACTTAAGTGCTTATCTGGTCTTTGGGATGTCCTCCCTGAGTATATTCCACTTCTTTACTCTGTTTGTCCTCGTCTTACCTCGTTGAACTTGAGCTATGCTACTGTCCAAATGCCTGATCTTGTCGATCTTCTTAGTCGATGCTCGAAACTGCAGAAGCTATGGGTGATGGACTTGATAGAGGACAAAGGTCTCAAAGCTGTTGCCTCGTGCTGCAAGGAACTGCGAGAACTAAGGGTGTTTCCATCTGGAGCAGAT---CTAGATGAAACAGACGTAGCTCTGACGGAACAAGGTCTGGTCTCTGTATCTGAAGGCTGTCCAAAGCTTGAATCTGTTCTCTACTTCTGTGTCCAGTTCACAAACACAGCCTTGGTTACCATCGCGAGAAACCGTCCAAATTTCAGATGCTTCCGCCTCTGTGTGATGGAGCCGTTTGCTCCTGATTACAGAACACAAAAGCCACTCGATGAAGGATTCAAAGCCATAGTTGAGAGATGCAAGGATCTTCAACGGCTCTCTGTCTCAGGTCTCCTCACCGACAAGGCCTTTGAATACATCGGGAAACACGCCAAGAAGCTTGGGATGCTATCAGTAGCATTTGCTGGGGACAGTGATCTCATGCTTCATCACTTGTTGTCAGGCTGTGAGAGTTTAAAGAAGCTCGAGATCAGAGATTGCCCTTTCGGAGACGCTGCGCTGCTGGAGAACGCTGCGAAACTAGAAACCATGCGATCCCTTTGGATGTCGTCTTGCTTCGTAAGTTTCGATGCTTGCAAGATCCTGAGCCAGAAGATGCCGAGGCTCAACGTCGAAGTCATCGATGAACAT---CCTCCAGAGACAAGGCCGGAGAGCTCTCCAGTTGAGAGGATATACATTTACAGAACCGTCGCGGGACCGAGGTTGGATATGCCTGAATTTGTGTGGACAATACACAAG---ACTCCCGAGATCGGAGTTTCAAATCTAGCCATAAAG------------------------TAA
    Aethionema_arabicum_AFB1_LG5_1055538                ---------------ATGGATCTCCAGTTACCAGCGAAGGTTCTGGAACATGTCCTCTCCTTCATTGACTCCGCCGAGGACCGAAACTCAGTTTCACTGGTCTGCAAGTCGTGGTTTGAGACAGAGCGGCGAACTAGGCGGAGACTCTTTGTCGGGAACTGTTATGCTGTCAGTCCTAAGGCGGTTGTGCAGCGGTTCCCGGAGTTAAGATCTCTGACGCTGAAGGGGAAGCCGCACTTTGCTGACTTTAATCTGGTTCCTGACGGCTGGGGTGGCTATGCGTGGCCGTGGATCGAGGCCATGGCGTCATCGAACCCTTCGCTTGAGGAGATAAGGCTAAAGAGGATGGTGGTGACTGATGAATGTTTGGAGTTGATAGCTGGATCGTTTAAAGACTTTAAAGTACTTGTGTTGACTTCTTGTGAAGGGTTCTCCACTGATGGCCTCGCCGCCATTGCTGCTACTTGCAGGCACTTGAGAGAGCTGGAACTGCGAGAATGCATAGTTGAAGATCTAGGAGGCGATTGGCTCAGTTATTTCCCAGAAACTTTCACTTCATTGGTGTCTCTTGACTTCTCTTGTCTGGACTCTGAGGTTAGTCTCTCGGACTTGGAGCGTCTAGTAAGCAGGTGTCCAAACCTCAAGTCGCTTAAGCTGAATCGAGCCGTGACTCTAGACGGACTCGAGAGCTTACTTCGTCGAGCTCCCCAGCTGACAGAGCTCGGAACAGGTTCTTTCTCAGGCGAACTGAAACCAGACGCGTTTGCAAAATTATCAGAAGCTTTTGCAGGCTGCAAGCAACTCAAGAGCTTATCTGGTCTCTGGGATGTCCTTCCTGAGTATCTTCCAGCTCTTTATTCTGTCTGTGCTGGCCTTACCTCGTTGAACTTGAGCTATGCTACTGTCCGCAGAGCTGATCTTGTTGACCTTCTAAGTCAATGCCCGAAATTACAGAAGCTATGGGTAATGGACTTGATAGAGGATAAAGGCCTTGAGTTTGTTGCTTCGTGTTGTAAGGAACTGCGAGAACTGAGGGTATTTCCATCTGAACCAGAT---ATGGATGAAGCAACTGTAGCTTTGACAGAACAAGGCCTTGTCTCTGTGTCAGAAGGTTGTCCAAAGCTGGAATCTATTCTTTTCTTCTGCACCCAGTTCACTAATGCTGCATTAGTTACCATAGCTAGAAACCGTCCAAATATCAGGTGCTTCCGTCTCTGTGTAATAGAGCCGTTTTCCCCGGATTACCAAACACTTGAGCCACTTGATGAAGGCTTCGGAGCCATAGCTGAGGAGTGCAAGGATCTCTACAGGCTGTCTGTCTCTGGTCTCCTAACTGACAAAGCCTTTAGTTACATTGGGAAATATGCCAAGAAGCTTGAGATGCTATCAATAGCATTCGCAGGGGACAGTGATCTGGGGCTTCATCACTTGTTGTCAGGTTGTGAAAACTTGAGAAAACTAGAGATAAGAGATTGCCCCTTTGGAGACACTGCACTCTTGGAGAACGCAGCGAAACTAGAGACCATGCGATCCCTTTGGATGTCGTCTTGCCCTGTAAGTTTTGAAGCGTGTAAGCTTCTCAGTCAGAAAATGCCAAAGCTCAATGTCGAAGTTATTGATGAACGTGACCCTCCAGAATCGAGACCTGAGAGCTCTCCAGTTGAGAGGGTATACATATATAGAACTGTAGCAGGACCAAGACTGGATATGCCTGAATTTGTGTGGACAATACAGAAG---AATCCCGAGATTGGTGTTTCACATCTGACCATAGAG------------------------TAA
	Tarenaya_hassleriana_104801198                      ---------------ATGGGTCCCTCGTTTCCCGCCAAGATCCTCGAGCATATCTTCTCCTTCGTTAGCTCCGGCGAGGACCGCAACGCCATCTCCGCCGTCTGCAAGTCGTGGTACGAGATCGAGCGGCAGAGCAGGCGCCGGATCCTCGTCGGAAACTGCTACGCCGTGAGCCCCGCGGCTGTGACGCGGCGGTTCCCGGAGCTCCGGTCGGCGTCTCTGAAGGGGAAGCCCCACTTCGCCGACTTCAATCTGGTCCCCGATGGCTGGGGAGGCCACGCGCTTCCGTGGATCGCAGCGTTCGCGGCGGCGTACCCGTGGATGGAGGGGATCAGGATGAAGAGGATGGTTGTAACCGACGAGTGCTTGGAGATGATCGCTGAGTCGTTTCGGGATTTCAAGGTGCTCGTCCTCTCGTCGTGTGAAGGGTTCACAACCGATGGACTCGCCGCCATCGCCGCTAGCTGCAGTAACCTGACAGAGCTTGACGTGAGCGAGAGCGAAGTGGAAGATCTTGGAGGAGACTGGCTCAGCTATTTCCCCGACACATGCACTTCACTTGTCTCTCTCAACTTCTCTTGCCTTGAATCTGAAGTCAGTTCCTCAGATTTAAGACGTCTCGTGGCTCGGTCTCCCAACCTCAAGTCTCTTGTCCTAAACCGAGCCGTGTCTCTTGACCACCTCAACGAGTTACTTCGTCGTGCACCTCAACTCACTGAGTTGGGCACTGGCTCGTTCTCTGCTGAGCTCCAACCTCATGCCTTGTCAGACCTGTCAGAAGCGTTTTCGGGTTGTAAGGACCTTAAATGCTTGTCAGGTCTTTGGGATGTTATCCCTGACTATCTTCCAGCTCTTTACACTGTTTCATCTGGTTTAACTTCGTTGAACTTGAGCTACGCCACTATACGCAGTCATGATCTCGTCAAGCTTCTTAGTCAGTGCCCGAAATTGCAGAAGCTATGGGTGCTGGACTTCATAGAAGACAGTGGCCTCGAAGCGGTCGCATCATGCTGCAAGGACATGCGAGAATTGAGGGTGTTTCCATCAGATCCGGAT---GCTGGTGAAGTAGATGTAAACCTGACGGAACAAGGCCTCGTCTCTGTCTCTGACGGCTGTCCGAATCTCGAATCTGTTCTCTACTTCTGTCGCCAATTTAGCAATGTGGCCATGGTGACCATAGCACGAAACCGTCCAAATCTGAAGTGCTTTCGCCTCTGCATAATGGAGCCATTTGCCCCTGATTACCAAACCCTTGAGCCGCTCGACGAGGGATTCGGAGCCGTAGTCGAACACTGCAAAGATCTTCAGCGGCTCTCAGTCTCGGGCCTCCTAACGGACAAGGCCTTCGAGTACATTGGACGACACGCCAAAAAACTCAAGATGCTATCGGTAGCATTCGCTGGAGAGAGCGATATGGGGCTCCGACACTTGTTGTCAGGCTGCGAGAATTTGAGAAAGCTCGAGATCAGAGACTCTCCCTTCGGCGACGAGGCCATCTTGGAGAATGCAGAGAGACTAGAAACAATGCGATCCCTTTGGATGTCATCATGCCCCGTAAGTTTCGGGGCATGCAAGCTCCTAAGCGAAAAGATGCCGAGGCTCAATGTAGAGGTCATCGACGAAAGGGGACCGCCAGAATCGAGACCAGAGAGCTGTCCAGTAGAAAGGGTTTACATATACAGAACTGTAGCTGGACCGAGAGAGGACATGCCTGATTTCGTCTGGACATTGCACAAG---AATCCA------------------------------------------------------TAG
	Polanisia_trachysperma_QSKP2027609e                 ---------------ATGGATCTCTCGTTTCCCGCCAAGGTCCTCGAGCGCATCTTCTCCTTCATCAGCTCCGGCGACGACCGCAGCTCCGTCTCCCTCGTCTGCAAATCGTGGTACGACGTCGAGCGGCGGAGCAGGCGCCGGATCCTCGTCGGGAATTGCTA?????????????????????????????????????????????????????????????????????????????????????????????????????????????????????-??????????????????????????????????????????????????????????????-???????????????????????????????????????????????????????????????????-??????????????????????????????????????????????????????????????????????????????????????????????????????????--???????????????????????????????????????????????????????????????????????????????????????????????????????????????????????????????????????????????????????????????????????????????CGTTTAGCACCTCAGCTGACTGAGTTGGGAACCGGCTCTTTCTCTGCTGAGCTGCAACCAGATGCTTTTTCAGACTTATCAGAAGCATTTTCGGGCTGCAAGCAACTTAAGAGCTTGTCGGGTCTTTGGGACCTCATCCCTGAGTACCTTCCAGCTCTTTACTCTGTTTGCTGTGGACTAACTTCGTTGAACTTGAGCTACGCCATGATACGCAGCCCTGATCTTGTCAAGCTTCTTAGTCAGTGCCCAAAACTGCAGAAGCTATGGGTACTGGACTTCATAGAGGACAGTGGCCTAGAAGCGATTGCGTCATGTTGCAAGGACTTGCGAGAACTGAGGGTTTTTCCGTCTGACCCAGAA---GCTGGTGAAGTAGATGTAACCCTGACGGAACAAGGCCTCATCTACGTGTCTGAGGGCTGTCCAAAGCTTGAGTCAGTTCTCTACTTCTGTCACCAATTTAGCAATGCAGGCATGGTAACCATCGCAAGAAACCGTCCAAATCTGAGATGTTTTCGCCTCTGCATAATGGAGCCTTTTGCCCCTGATTACCAAACTCTCGAGCC?CTTGATGAAGGATTTGGAGCCATAGTGGAGCACTGCAAAGATCTCCAGCGACTCTCTGTCTCTGGCCTCCTCACAGATGAGGCATTTGAGTACATTGGACGATACGCCAAAAAGCTCAGGATGCTATCAATAGCTTTCGCCGGGGACAGTGATCTAGGGCTTCATCACTTGTTGTCAGGGTGTGAAAGTTTAAGAAAACTTGAGATAAGAGACTCTCCCTTCGGTGATAAGGCACTCTTGGACAACGCAGCGAAACTGGAGACTATGCGATCCCTTTGGATGTCATCCTCCCCTGTAAGTTTCGGGGCATGCAAGCTTCTAAGCCAAAAGATGCCAAGGCTCAATGTAGAAGTCATCGACGAAAGGGGATCCCCAGACTCGAGGCCAGAGAGCTGCCCAGTCGAGAGGGTCTACATATACAGAACTGTCGCAGGACCGAGACAGGACATGCCTGATTTCGTGTGGACAGCTCAGAAA---AATACTGAGAGTGAGGTTTCT---------ATTCTG------------------------TAA
	Salvadora_RTTY2020246                               ---------------??????????????????????????????????????????????????????????????????????????????????????????????????????????????????????GCAGGCGCCACGTCTTCGTCGGAAACTGCTACGCGGTGGACCCAACGGCCGTGACACGACGGTTCCCGGATTTGAGATCGGTGAAGCTCAAGGGAAAACCCCACTTTGCAGACTTTGGTTTGGTGCCTGAGGGCTGGGGTGGCCACGTGTCCACCTGGGTTCAGGTGATGTCGAAGTGTTATCCAAGGATGGAGGAGATAAGGCTGAAGAGGATGGTGGTGACGGACGAGAGTTTGGAGATGATGGCTGTGGCGTTTCCAGATCTCAAGGTGCTTGTTCTGACCTCCTGTGATGGCTTCTCCACCGATGGCCTTGCCCCCATTGCTGCTAATTGCAGACACCTGAGAGAGCTTGAGCTGCAAGAATGTGAAGTAGAAGATATGGGTGATGACTGGCTTAGCTATTTCCCTGACACAAACACTTCATTGGTATCTCTTAATCTCTCTTGCCTCGATTCTGAAGTAGGTTTCTCAACCTTAGAACGGCTGGGGAGCCGTTGCCCCAACTTGAAATCTCTTCGGCTCAACCGGTCTATACCCATAGACAGTCTTGAAAGTTTACTTCGAAAAGCACCTCAACTGGTTGCGTTGGGTACGGGCGATTTCTCCACTGGGCTACAGCCACATGTGTTCTCAAACTTATCAGAAGCGTTTTCGGGCTGCAAGCAACTGAAGAGCCTGTCTGGTTTCTGGGATGTCATCCCTGAGAATCTTCCAGTGATTTATTCGATTTGCCCGCAAATAACCTCATTGAACTTAAGCAGTGCTACCATTGATAGCGCTGATCTTATCAAACTTCTTGGTCAGTGCCCAAAATTGCAGAGGCTATGGGTAATGGACTTCATACAAGACAGTGGCCTTGAAGTTGTTGCAGCAAAATGCAAGGACTTGCAAGAACTGAGGGTGTTTCCATCTGACCCATTT---GGTGGTGAAGCAAATGTGACTTTGACAGAACAAGGCCTTGTCCGTGTGTCTGAGGGCTGTCCAAAGCTTGAACGCATTCTGTACTTCTGTCGCCAGTTTACCAATGCAGCACTGGTTACTATTGCAAGAAACCGTCCGAATTTAACCTGTTTTCGTCTGTGTATCATGGATCTGTGCACTCCTGACTACCTAACGCTTGAGCCGCTTGATGTGGGGTTTGGAGCCATAGTTGAGCACTGCAAAGACCTTCAACGTCTCTCTATCTCTGGCCTCCTAACCGACGAGGTTTTTGAGTACATTGGAAAATATGCCAACAAGCTTGAGATGCTATCAGTAGCATTTGCTGGGGATAGTGATATGGGGCTTCATCACTTGTTGTCAGGCTGTGAAAGTCTGAGAAAACTCGAAATAAGAGATTGCCCTTTTGGCGAAAAGGCACTTTTGGACAACGCTGCGAAGTTAGAGACGCTGCGATTCCTTTGGATGTCATCATGCTGTATGACTTTCGAGGGATGCAAGCTTTTAGGCCAAAATATGCCAAGGCTCAATGTTGAAGTCATCGATGAAAGAGGACCTCCAGATTCAAGACCCGAAATCTGCCCTGTCGAAACAGTCTACATATATAGAACAGTTGCAGGATCAAGATCCGACACGCCTGATTTCGTGTGGATAATGGAAAAG---GATCCCGAGATCAACGTTTCTCGGCTGGCCATATCG------------------------TAG
	Gyrostemon_ramulosus_UAXP2022187                    ATGCCG---AAGAAGATGGACCTGTCGTTTCCAGAGGAGGTGCTGGAGCACGTGTTCTCGTTCATCCATTCGGACAAGGACCGTAACGTCGTGTCACTGGTCTGCAAGTCGTGGTACGAGATCGAGCGGTGGAGCAGGCGGAGGGTCTTTATCGGTAACTGCTACGCTGTGATTCCGGAGGCGGTGACCCGGCGTTTCCCGAAGGTGAGATCCGTGGAGCTGAAGGGGAAGCCGCACTTTGCGGACTTCAACCTGGTCCCCGACGGCTGGGGTGGTCACGTATACCCTTGGATCGCGGCGATGTCCGCGTCGTACCCTTGGCTGGAGGAGATACGGCTGAAGAGGATGGTAGTCACGGACAAGAGCTTGGAGCTTATTGCTAAGTCTTTTAGGAACTTCAAGGTGCTCGTGCTATCTTCCTGTGAGGGATTCTCCACCGATGGACTCGCAGCAATTGCTGCAAATTGCAGAAATCTGAGAGAGCTTGATTTGCGTGAGAGTGAAGTGGATGATCTGAGCGGGTACTGGCTCAGCCATTTCCCAGATACATTTACATCACTGGTGTCTCTTAACATTTCTTGCTTGGGGTCTGAGGTAAGTTTCTCAGCCTTGGAGCGCCTGGTGAGCAGATGCCCCAACCTGAAATCTCTTCGGCTCAACCAAGCTGTGCCTCTTGAAAAGCTAGAAAGCTTACTAAGGCGAGCACCTCAACTTGTTGAGTTGGGAACAGGTGCTTACTCAGCCGAGTTGAGACCAGAGGTCTTTTCAACGTTATCAGGAGCCTTTTCTGGCTGCAAGGAACTCAAGAGCTTATCTGGGCTATGGGATGTTGCCCCTGCTTATCTTCCGGCCGTCTACTCTGTTTGCTCTGGACTAACTTCATTGAACTTGAGTTATGCTACTGTCCACAGCCCTGATCTTGTCAAGCTGCTTAGCCAATGCCCGAAATTGCAGAACCTTTGGGTGCTGGATTACATAGAAGACGATGGCCTTGAAGCTCTTGCATCATGTTGCAAGGACCTAAAAGAATTGAGGGTTTTTCCGTCTGATCCATTC---AGTGTGGAACCAAATGTGTCCTTGACAGAACAAGGCCTTGTCTCCGTCGCTGCAGGTTGTCCAAAGCTTCAGTCAGTTCTTTACTTTTGTCGGCAATTTACCAATTCAGCCCTAGTTAGCATTGCCGTGAACCGCCCAAACTTGACCCGTTTTCGTCTTTGCATCATGGAGCCACACAAACCTGATCATTTAACTCTTAAGCCACTTGATATTGGATTTGGAGCAATTGTCGAGCACTGCAAAGATCTCAGACGCCTTTCCCTCTCTGGCCTGTTAACAGACAAAGTGTTCGAGTACATTGGGACATATGCTAAGAAGCTAGAGATGTTATCGATAGCTTTTGCTGGGGACAGCGACTTGGGGCTCCATCATGTGTTATCGGGTTGTGAAAGTTTGAGGAAACTTGAGATAAGGGACTGTCCGTTTGGTGACAAGGCGCTTTTGGCCAATGCAATGAAACTAGAGACAATGCGATCCCTTTGGATGTCTTCTTGTTCTGTTAGTTTTGGGGCATGCAAGATTCTAGGCCAGAAGATGCCAAGACTCAACGTAGAAGTTATTGATGAGAGGGGACCTCCTGATTCAAGACCAGAAGACTGTCCTGTTGAGAAGCTTTACATATATAGAACGGTTGCAGGACCAAGATTCGACATGCCTAGGTTTGTCTGGACTTTGGATGAG---GATTCCAAGATCAGAGTTTCCGAACAAATAGCTCGG------------------------TGA
;
END;

begin mrbayes;
	charset 1st_pos = 1 -1804 \ 3;
	charset 2nd_pos = 2 -1805 \ 3;
	charset 3rd_pos = 3 -1806 \ 3;
	partition by_codon = 3 : 1st_pos , 2nd_pos , 3rd_pos;
	set partition = by_codon;
	prset ratepr = variable;
    mcmcp nruns = 3 nchains = 4 ngen = 5000000 savebrlens = yes filename = TIR1AFB1_191211;
	lset nst = 6 rates = invgamma;
END;
