# Supplementary material for: Genetic analysis of the Arabidopsis TIR1/AFB auxin receptors reveals both overlapping and specialized functions
Source: eLife. 2020 Feb 18;9:e54740. doi: 10.7554/eLife.54740 (PMC7048394; doi:10.7554/eLife.54740)
Supplement: Supplementary file 7. [file elife-54740-supp7.xlsx]

## Sheet: t-tests_Figure1sup2
Pairwise 2-tailed t-tests (unequal variance) p values for phenotypes measured in Figure 1—figure supplement 2. Green fill indicates p < 0.05
10nM IAA							40nM IAA
tir1-1	tir1-1/+	tir1-10	tir1-10/+	tir1-9	tir1-9/+		tir1-1	tir1-1/+	tir1-10	tir1-10/+	tir1-9	tir1-9/+
1.17414e-08	2.41432e-05	1.55342e-07	0.0940173	1.05296e-05	0.00978427	Col-0	7.36039e-12	1.2217e-05	2.1984e-11	3.36437e-06	1.58384e-13	0.00768189	Col-0
	0.00201552	0.243433	0.00016153	0.439157	0.000174573	tir1-1		4.28403e-07	0.895932	5.00999e-05	0.693415	8.90669e-07	tir1-1
		0.0349933	0.0570727	0.103377	0.130399	tir1-1/+			6.66294e-07	0.218518	3.21646e-09	0.290828	tir1-1/+
			0.00180942	0.897939	0.0026907	tir1-10				4.46883e-05	0.805335	8.56413e-07	tir1-10
				0.0060833	0.54735	tir1-10/+					1.82569e-06	0.0676799	tir1-10/+
					0.0149053	tir1-9						1.86132e-07	tir1-9

## Sheet: t-tests_Figure1sup4
Pairwise 2-tailed t-test (unequal variance) p values for phenotypes measured in Figure 1—figure supplement 4. Green fill indicates p < 0.05.
Pairwise 2-tailed t-tests Genotypes Compared		Inflorescence stem length (cm)	Rosette Diam (cm)	Total number of inflorescence branches	Number of Lateral Roots (emerged)	Ethanol length	20 nM IAA length	100 nM IAA length	500 nM IAA length	20 nM IAA/etoh	100 nM IAA/etoh	500 nM IAA/etoh
Col-0 a	tir1-1 a	0.276177	0.70121	0.320319	2.10899e-06	0.364459	5.10636e-07	0.00138973	NA	3.82821e-08	0.00091414	NA
Col-0 a	afb1-3	0.188071	0.128661	0.649379	0.688204	0.908042	0.200309	0.00202593	NA	0.172827	0.0018806	NA
Col-0 a	afb2-3	0.301384	0.327024	0.279332	0.0557192	0.277062	0.00271561	0.598105	NA	0.000424463	0.430146	NA
Col-0 a	afb3-4	0.350578	0.14933	0.558255	0.829846	0.929388	0.99694	0.558541	NA	0.98557	0.545807	NA
Col-0 a	afb4-8	0.410467	0.0792717	0.349469	0.586773	0.751374	0.368367	0.807317	NA	0.457276	0.89686	NA
Col-0 a	afb5-5	0.0102651	0.293439	0.302116	0.744503	0.29598	0.030593	0.172241	NA	0.00670142	0.109518	NA
Col-0 a	afb12*	0.210866	0.676663	1	0.164014	0.634813	0.00284	0.0805944	NA	0.0121049	0.109242	NA
Col-0 a	afb13	0.141519	0.143292	0.501482	0.1644	0.359523	0.536992	0.422313	NA	0.811362	0.541905	NA
Col-0 a	afb14	0.1929	0.107469	0.624823	0.559159	0.321365	0.147151	0.768659	NA	0.358412	0.948549	NA
Col-0 a	afb15	0.0224518	0.115484	0.344069	0.0251177	0.0254765	0.00254886	0.412826	NA	0.28052	0.158553	NA
Col-0 a	afb23	0.025438	0.32296	0.815472	1.7393e-06	0.014407	8.51221e-05	0.000133448	NA	0.000485031	0.000676732	NA
Col-0 a	afb2-1 3-1	0.0070195	0.782819	0.890297	0.0595026	0.812172	0.000365484	1.59892e-08	NA	0.000220746	1.35488e-08	NA
Col-0 a	afb24	0.073107	0.21449	0.838105	0.073456	0.166297	0.00340794	0.00396761	NA	8.38921e-05	0.00176556	NA
Col-0 a	afb25	0.0172739	0.985658	0.53222	0.00026951	0.670224	0.000130052	0.00283161	NA	0.000226531	0.00348005	NA
Col-0 a	afb34	0.098832	0.91565	0.953894	0.0222964	0.0391026	0.0945415	0.00747022	NA	0.640649	0.0383975	NA
Col-0 a	afb35	0.00903083	0.18827	0.0622866	1.02144e-05	0.620976	0.000273778	0.00154512	NA	6.14396e-05	0.00112724	NA
Col-0 a	afb45	0.00220971	0.118153	0.0435198	5.33887e-05	0.0472733	0.657145	0.0292102	NA	0.380563	0.0125303	NA
Col-0 a	afb124	0.074485	0.578773	0.662106	0.734016	0.00012314	1.50254e-09	0.0111359	NA	2.26402e-05	0.101797	NA
Col-0 a	afb125*	0.00658557	0.230145	0.0594585	0.0553611	0.0226765	5.06512e-05	1.37517e-05	NA	0.00184079	0.000105109	NA
Col-0 a	afb134	0.0461499	0.34653	0.621782	1	0.0869394	9.33611e-07	0.0216189	NA	0.000269846	0.0400015	NA
Col-0 a	afb135	0.00695884	0.465937	0.211307	0.00500148	0.848128	0.00360175	0.00557594	NA	0.0056864	0.00602217	NA
Col-0 a	afb145	0.00684653	0.40131	0.0157453	0.341564	0.0665275	0.00368695	0.0157106	NA	0.0679576	0.0265805	NA
Col-0 a	afb234	0.0201532	0.154852	0.0747952	1.55411e-05	0.137982	1.88523e-07	0.000263264	NA	2.46347e-06	0.000332963	NA
Col-0 a	afb235	0.00121946	0.152441	0.126928	9.73718e-11	0.21637	0.00215961	9.46167e-08	NA	0.000431435	6.52414e-08	NA
Col-0 a	afb245	0.00577452	0.154353	0.0123762	1.64397e-07	0.0120981	0.219395	7.57801e-07	NA	0.0557271	1.09451e-07	NA
Col-0 a	afb345	0.00264207	0.253853	0.0076011	1.18984e-08	0.00545138	0.439725	0.000442068	NA	0.154697	2.13364e-05	NA
Col-0 a	afb1234	0.051947	0.371953	0.232886	0.0768557	0.0760603	1.8483e-07	6.15025e-07	NA	1.78022e-06	1.73259e-06	NA
Col-0 a	afb1235*	0.00345329	0.331772	0.0931762	2.50755e-09	0.0261464	1.27756e-09	3.3991e-13	NA	1.85426e-08	1.82112e-12	NA
Col-0 a	afb1245	0.00364411	0.184396	0.0438147	1.31646e-06	0.946901	1.93352e-06	6.3899e-06	NA	1.75228e-06	6.16336e-06	NA
Col-0 a	afb1345	0.00104887	0.591766	0.0069892	0.0318615	0.282901	3.35137e-05	0.000863512	NA	0.000224309	0.00182192	NA
Col-0 a	afb2345	0.000116886	0.00363494	0.0165392	3.04578e-13	3.51549e-05	0.0377832	4.03189e-08	NA	6.49281e-08	7.36745e-12	NA
Col-0 a	afb12345	0.000137666	0.00804077	0.00463198	1.72764e-13	0.00602362	0.000260075	3.29185e-05	NA	2.48632e-09	7.46871e-06	NA
tir1-1 a	afb1-3	0.583205	0.000530811	0.158019	0.00021328	0.424477	2.01761e-05	4.92973e-06	NA	3.99974e-06	3.92082e-06	NA
tir1-1 a	afb2-3	0.749861	0.00119302	0.858998	0.0168759	0.677992	0.269079	0.00842102	NA	0.439248	0.0105621	NA
tir1-1 a	afb3-4	0.855316	0.00188109	0.573457	0.000370833	0.422873	0.105206	0.0100055	NA	0.0715044	0.00681725	NA
tir1-1 a	afb4-8	0.636503	0.00414675	0.955267	2.3771e-07	0.773619	0.00438817	0.000822806	NA	0.00323431	0.000682743	NA
tir1-1 a	afb5-5	0.0297312	0.083489	0.941917	0.000412864	0.796972	0.0278162	0.0268768	NA	0.040668	0.0301766	NA
tir1-1 a	afb12*	0.866273	0.206373	0.286902	0.00604482	0.353191	0.14492	0.164748	NA	0.00654224	0.0795499	NA
tir1-1 a	afb13	0.617776	0.00285122	0.692163	0.00199813	0.0376452	0.0176761	0.0102192	NA	0.00232567	0.00425252	NA
tir1-1 a	afb14	0.548633	0.000660202	0.128192	0.00019926	0.853136	1.44114e-05	0.000990698	NA	1.86851e-05	0.00107343	NA
tir1-1 a	afb15	0.0825916	0.000351228	0.95468	0.00508231	0.00275502	0.0204333	0.000325852	NA	2.35235e-06	7.70404e-05	NA
tir1-1 a	afb23	0.0905886	0.0112732	0.430447	0.34095	0.000173804	0.0273564	0.784064	NA	0.479623	0.255633	NA
tir1-1 a	afb2-1 3-1	0.0226925	0.27734	0.280518	0.00172889	0.839207	0.620364	0.00564378	NA	0.820444	0.00811476	NA
tir1-1 a	afb24	0.333453	0.0111802	0.167339	0.0530346	0.413455	0.0267559	0.602442	NA	0.169465	0.790673	NA
tir1-1 a	afb25	0.059277	0.582794	0.54223	0.862834	0.122603	0.793341	0.53769	NA	0.467463	0.349999	NA
tir1-1 a	afb34	0.337367	0.476455	0.342365	0.0200854	0.00945522	0.249937	0.307541	NA	0.00442779	0.0538477	NA
tir1-1 a	afb35	0.0191821	0.0137916	0.25226	0.538804	0.831401	0.0537142	0.688511	NA	0.0315049	0.642409	NA
tir1-1 a	afb45	0.00294608	0.00390772	0.163133	0.187378	0.160016	3.91119e-05	0.251344	NA	0.000482557	0.40214	NA
tir1-1 a	afb124	0.321735	0.185038	0.387956	0.000221401	5.59341e-06	0.00221185	0.2528	NA	0.0512973	0.0224678	NA
tir1-1 a	afb125*	0.0140875	0.0227232	0.286204	0.0877032	0.00364555	0.150381	0.505305	NA	0.221362	0.636876	NA
tir1-1 a	afb134	0.191439	0.0108158	0.554214	0.000724477	0.00744179	0.366825	0.527766	NA	0.000362399	0.223128	NA
tir1-1 a	afb135	0.0104522	0.0249954	0.829927	0.0139474	0.424133	0.113069	0.71854	NA	0.0158729	0.912088	NA
tir1-1 a	afb145	0.0194366	0.0945119	0.0666006	0.000442437	0.00449722	0.110509	0.972749	NA	0.000538116	0.542651	NA
tir1-1 a	afb234	0.0739861	0.0029248	0.356397	0.683769	0.0188916	0.0259219	0.0124136	NA	0.987858	0.0344495	NA
tir1-1 a	afb235	0.00247782	0.00142892	0.497904	0.000204507	0.523398	0.83816	0.00248776	NA	0.760298	0.00124634	NA
tir1-1 a	afb245	0.0173358	0.0281718	0.0485926	0.215297	0.0410227	0.176858	0.435792	NA	0.516138	0.18187	NA
tir1-1 a	afb345	0.00238371	0.0049302	0.0281668	0.071131	0.0164229	1.99542e-07	0.216749	NA	3.23319e-05	0.494813	NA
tir1-1 a	afb1234	0.217957	0.02436	0.938369	0.00114778	0.0105616	0.00110295	0.0592703	NA	0.155033	0.336639	NA
tir1-1 a	afb1235*	0.00726872	0.0238306	0.372627	0.00939885	9.59526e-05	0.000162684	0.000103822	NA	0.0773844	0.00270474	NA
tir1-1 a	afb1245	0.00763624	0.0143027	0.123661	0.399641	0.324594	0.210121	0.382229	NA	0.577726	0.529076	NA
tir1-1 a	afb1345	0.000661103	0.350676	0.0263191	0.113648	0.0293212	0.967847	0.447475	NA	0.11106	0.209695	NA
tir1-1 a	afb2345	3.42715e-05	1.77599e-05	0.033048	2.04323e-09	0.000105317	0.000348812	0.587945	NA	0.234278	0.0149673	NA
tir1-1 a	afb12345	4.27424e-05	2.47288e-06	0.0142288	3.06491e-09	0.0186284	0.0130702	0.356518	NA	0.322282	0.0652179	NA
afb1-3	afb2-3	0.888063	0.0796936	0.142918	0.0522323	0.318805	0.000757741	0.00507606	NA	0.000118267	0.00350135	NA
afb1-3	afb3-4	0.501552	0.830961	0.283331	0.586624	0.852735	0.621627	0.0057324	NA	0.58669	0.00540984	NA
afb1-3	afb4-8	0.379699	0.488227	0.189294	1	0.7114	0.919589	0.00316198	NA	0.930484	0.00239828	NA
afb1-3	afb5-5	0.241622	0.620947	0.138854	0.523043	0.353922	0.00623736	0.000335585	NA	0.00134128	0.000236151	NA
afb1-3	afb12*	0.652956	0.0820449	0.628133	0.128259	0.714146	0.000902071	0.00115523	NA	0.00244577	0.00131811	NA
afb1-3	afb13	0.836277	0.903636	0.259136	0.131833	0.566578	0.16399	0.00210213	NA	0.252786	0.00252402	NA
afb1-3	afb14	0.928524	0.756132	1	0.865223	0.376934	0.852547	0.0100925	NA	0.744119	0.00675243	NA
afb1-3	afb15	0.440166	0.849324	0.184566	0.0335345	0.0764255	0.00137152	0.0192329	NA	0.0382632	0.0479236	NA
afb1-3	afb23	0.496978	0.178366	0.489948	6.52708e-05	0.0871974	1.94438e-05	6.01666e-07	NA	9.89126e-05	8.10552e-07	NA
afb1-3	afb2-1 3-1	0.124126	0.0506546	0.49821	0.0627609	0.76906	9.8223e-05	1.68947e-09	NA	5.04487e-05	1.74595e-09	NA
afb1-3	afb24	0.915214	0.538176	0.734204	0.0605816	0.203064	0.00147083	3.87268e-05	NA	8.05925e-05	2.9669e-05	NA
afb1-3	afb25	0.217781	0.0350477	0.256914	0.000602369	0.842558	5.72018e-05	1.70907e-05	NA	7.83024e-05	1.77743e-05	NA
afb1-3	afb34	0.724275	0.0567484	0.605952	0.0272452	0.0761911	0.0251919	2.88312e-05	NA	0.185566	5.4791e-05	NA
afb1-3	afb35	0.212193	0.711034	0.0300256	0.00049377	0.605215	0.000478076	8.56515e-06	NA	0.000157565	7.5935e-06	NA
afb1-3	afb45	0.0569198	0.853143	0.0222314	0.00123094	0.0970651	0.445535	0.000341153	NA	0.0680486	0.000244735	NA
afb1-3	afb124	0.831686	0.166092	0.326987	0.511163	0.00249219	2.24895e-07	3.25891e-05	NA	0.000103892	9.76644e-05	NA
afb1-3	afb125*	0.164924	0.563195	0.0264941	0.0464444	0.0587184	1.48963e-05	9.6009e-08	NA	0.000402366	1.47106e-07	NA
afb1-3	afb134	0.734843	0.135571	0.335242	0.733488	0.208685	8.72587e-05	0.000521155	NA	0.000834695	0.000662272	NA
afb1-3	afb135	0.142696	0.0599304	0.0952534	0.0122889	0.938904	0.00110568	0.00030711	NA	0.00131205	0.000311096	NA
afb1-3	afb145	0.162875	0.313991	0.00740971	0.247995	0.181587	0.00112746	0.000740228	NA	0.0106864	0.000914996	NA
afb1-3	afb234	0.395864	0.806242	0.0331157	0.000431528	0.270036	1.05271e-06	5.95285e-05	NA	8.30814e-06	6.37473e-05	NA
afb1-3	afb235	0.0294847	0.791316	0.0599693	1.75391e-06	0.253704	0.000506706	1.12726e-08	NA	8.84295e-05	1.16744e-08	NA
afb1-3	afb245	0.124575	0.957908	0.00614373	4.30953e-05	0.0489192	0.0729992	1.72144e-09	NA	0.0178965	1.27117e-09	NA
afb1-3	afb345	0.0323612	0.293377	0.00387387	3.10356e-05	0.0315297	0.461179	1.13277e-08	NA	0.0224014	2.42899e-09	NA
afb1-3	afb1234	0.792662	0.156318	0.103413	0.0762067	0.166557	1.23019e-07	2.72872e-08	NA	1.30659e-06	2.87923e-08	NA
afb1-3	afb1235*	0.0904841	0.229141	0.0444187	8.19667e-06	0.149297	3.79222e-08	3.61189e-14	NA	4.09315e-07	4.43875e-14	NA
afb1-3	afb1245	0.0955289	0.739588	0.026518	7.47624e-05	0.861907	5.07499e-06	7.5005e-08	NA	3.7491e-06	7.38646e-08	NA
afb1-3	afb1345	0.0172857	0.452791	0.00347257	0.029087	0.478631	3.93988e-05	8.73914e-07	NA	0.000141245	1.09066e-06	NA
afb1-3	afb2345	0.00185895	6.54519e-07	0.0121673	4.22092e-07	0.00052824	0.00952853	3.16341e-12	NA	1.02296e-06	3.34114e-14	NA
afb1-3	afb12345	0.00144898	3.99123e-07	0.00269056	3.08944e-07	0.0144877	0.000769524	7.29263e-07	NA	1.81733e-06	5.96155e-07	NA
afb2-3	afb3-4	0.666667	0.166651	0.48698	0.12976	0.314898	0.219077	0.955919	NA	0.127727	0.858954	NA
afb2-3	afb4-8	0.551974	0.0810965	0.916011	0.0162757	0.589397	0.0152847	0.460546	NA	0.00794148	0.365166	NA
afb2-3	afb5-5	0.255843	0.714033	0.79358	0.150918	0.851527	0.328302	0.482699	NA	0.268714	0.512415	NA
afb2-3	afb12*	0.822222	0.375695	0.252653	0.640396	0.278703	0.808412	0.216413	NA	0.107321	0.40363	NA
afb2-3	afb13	0.988104	0.172774	0.588063	0.545588	0.0538282	0.109684	0.83739	NA	0.0135807	0.808396	NA
afb2-3	afb14	0.829184	0.0586623	0.120271	0.0397467	0.805058	0.000546696	0.450975	NA	0.000379891	0.41922	NA
afb2-3	afb15	0.416645	0.0525228	0.915058	0.96629	0.00389796	0.436154	0.234832	NA	0.00253965	0.0662949	NA
afb2-3	afb23	0.4636	0.924204	0.371158	0.00448398	0.0022656	0.00849121	0.00310583	NA	0.251045	0.0323269	NA
afb2-3	afb2-1 3-1	0.141197	0.250893	0.252143	0.760013	0.685237	0.203195	5.8538e-07	NA	0.424241	1.14048e-06	NA
afb2-3	afb24	0.796883	0.458976	0.158824	0.900193	0.695319	0.456635	0.0209361	NA	0.719164	0.0159726	NA
afb2-3	afb25	0.219045	0.149563	0.460759	0.0370699	0.124011	0.248751	0.0191553	NA	0.943193	0.0455912	NA
afb2-3	afb34	0.646061	0.223769	0.297801	0.796618	0.00821619	0.683008	0.0461024	NA	0.0234499	0.299073	NA
afb2-3	afb35	0.236126	0.382437	0.356614	0.0387131	0.611015	0.719331	0.0115195	NA	0.389596	0.0167352	NA
afb2-3	afb45	0.0878168	0.137244	0.232812	0.100547	0.459377	0.00313888	0.103592	NA	0.0103745	0.0735603	NA
afb2-3	afb124	0.731291	0.589111	0.340363	0.137565	3.84365e-05	0.00118494	0.0635726	NA	0.49379	0.536878	NA
afb2-3	afb125*	0.192752	0.53979	0.436123	0.762334	0.00390684	0.0407958	0.000322543	NA	0.678167	0.00715164	NA
afb2-3	afb134	0.65078	0.960388	0.472765	0.114858	0.0122672	0.565449	0.063459	NA	0.077219	0.180566	NA
afb2-3	afb135	0.177662	0.526862	1	0.600545	0.322377	0.728178	0.0138608	NA	0.179896	0.0234716	NA
afb2-3	afb145	0.184936	0.953596	0.125443	0.299472	0.00912208	0.72097	0.0374258	NA	0.0244989	0.0985122	NA
afb2-3	afb234	0.379978	0.201443	0.517494	0.0349555	0.0220046	0.00712537	0.000364879	NA	0.459746	0.000662809	NA
afb2-3	afb235	0.0496841	0.161315	0.645492	3.06245e-05	0.821391	0.503608	6.79419e-07	NA	0.397975	5.64044e-07	NA
afb2-3	afb245	0.146118	0.324323	0.0821149	0.00230846	0.266633	0.485438	0.000110865	NA	0.845908	3.70694e-05	NA
afb2-3	afb345	0.0611822	0.588338	0.0488757	0.0010424	0.174207	0.000756789	0.0210381	NA	0.0066641	0.00698751	NA
afb2-3	afb1234	0.696475	0.896778	0.890791	0.67329	0.0122381	0.000348873	1.15131e-05	NA	0.0692557	0.00015384	NA
afb2-3	afb1235*	0.11968	0.934862	0.502493	0.000236369	0.00451614	0.000124604	9.14778e-09	NA	0.0390996	2.51045e-07	NA
afb2-3	afb1245	0.125014	0.37258	0.159723	0.00506832	0.258169	0.0483387	0.000166506	NA	0.247908	0.000421957	NA
afb2-3	afb1345	0.0389312	0.85393	0.0493391	0.620564	0.0418991	0.29639	0.0135216	NA	0.574362	0.0541157	NA
afb2-3	afb2345	0.00813928	4.20511e-06	0.0374849	2.74911e-06	0.0020274	0.0773388	0.000140576	NA	0.101049	1.42338e-06	NA
afb2-3	afb12345	0.00675097	2.37731e-07	0.0208802	1.99158e-06	0.071371	0.495001	0.00031104	NA	0.134202	5.98701e-05	NA
afb3-4	afb4-8	0.797003	0.414754	0.591731	0.495671	0.801594	0.610845	0.427226	NA	0.659614	0.47091	NA
afb3-4	afb5-5	0.0241674	0.7108	0.562201	0.922875	0.342519	0.405586	0.522305	NA	0.282044	0.393736	NA
afb3-4	afb12*	0.721023	0.110626	0.522004	0.291411	0.601055	0.252844	0.236126	NA	0.370093	0.31476	NA
afb3-4	afb13	0.501817	0.93983	0.882502	0.308734	0.314393	0.757414	0.884218	NA	0.922229	0.958044	NA
afb3-4	afb14	0.477045	0.62553	0.235877	0.479571	0.37075	0.564851	0.419539	NA	0.697784	0.528162	NA
afb3-4	afb15	0.0652971	0.698395	0.586087	0.0888945	0.0224673	0.32901	0.217161	NA	0.769665	0.0924517	NA
afb3-4	afb23	0.071472	0.275018	0.735475	0.000110233	0.0136493	0.0116585	0.00432355	NA	0.0452017	0.0195812	NA
afb3-4	afb2-1 3-1	0.0186377	0.0695975	0.545218	0.16235	0.849956	0.0805178	1.36415e-06	NA	0.0665325	1.02566e-06	NA
afb3-4	afb24	0.260964	0.678389	0.319368	0.140118	0.189825	0.327586	0.0246465	NA	0.155956	0.0105937	NA
afb3-4	afb25	0.0489522	0.0453255	1	0.00143116	0.601309	0.0938559	0.0229828	NA	0.119503	0.0295241	NA
afb3-4	afb34	0.283448	0.0723391	0.596599	0.0711588	0.0349164	0.353311	0.0540067	NA	0.832774	0.213574	NA
afb3-4	afb35	0.0162777	0.846413	0.10026	0.000928707	0.676422	0.255753	0.0140354	NA	0.205436	0.0106311	NA
afb3-4	afb45	0.00268888	0.727139	0.0700039	0.00258017	0.0602071	0.873878	0.116022	NA	0.746353	0.0518888	NA
afb3-4	afb124	0.257491	0.210497	0.769624	0.92035	0.000153072	0.0180381	0.07361	NA	0.183488	0.409197	NA
afb3-4	afb125*	0.0119314	0.686814	0.0765584	0.107996	0.0200887	0.0374445	0.000485226	NA	0.177419	0.004255	NA
afb3-4	afb134	0.148756	0.22062	0.940883	0.858311	0.0755571	0.149475	0.0704728	NA	0.3351	0.134162	NA
afb3-4	afb135	0.00947581	0.105779	0.379752	0.0324009	0.798897	0.269712	0.0153756	NA	0.312226	0.017399	NA
afb3-4	afb145	0.0159208	0.388616	0.0144376	0.533413	0.0579265	0.271308	0.0409732	NA	0.541075	0.074625	NA
afb3-4	afb234	0.0587091	0.969514	0.105778	0.000841214	0.120761	0.0281079	0.000391001	NA	0.0727543	0.000552162	NA
afb3-4	afb235	0.00212714	0.967491	0.216629	1.46621e-06	0.245505	0.134507	1.20209e-06	NA	0.0633688	4.96124e-07	NA
afb3-4	afb245	0.0142184	0.857557	0.0165227	6.0484e-05	0.0182447	0.468515	0.000204114	NA	0.205955	2.65594e-05	NA
afb3-4	afb345	0.00239665	0.429629	0.0098568	3.66729e-05	0.0090851	0.824513	0.0277308	NA	0.67043	0.0041596	NA
afb3-4	afb1234	0.168956	0.233866	0.423471	0.194844	0.0666517	0.00748086	2.03716e-05	NA	0.0282266	0.000102574	NA
afb3-4	afb1235*	0.00618113	0.322564	0.154964	8.56253e-06	0.0255727	0.00842242	5.54098e-08	NA	0.0260622	3.55533e-07	NA
afb3-4	afb1245	0.00649583	0.873328	0.0700748	0.000122972	0.973552	0.0517668	0.00026382	NA	0.0526523	0.000269882	NA
afb3-4	afb1345	0.000700793	0.503117	0.00763086	0.0703727	0.246738	0.10555	0.0171863	NA	0.179972	0.0335116	NA
afb3-4	afb2345	4.10522e-05	9.89898e-07	0.0247168	2.88127e-07	7.06515e-05	0.542887	0.000314834	NA	0.0369934	1.81888e-06	NA
afb3-4	afb12345	5.15868e-05	2.04611e-06	0.00744851	1.97236e-07	0.00768202	0.298413	0.000434007	NA	0.043819	4.38659e-05	NA
afb4-8	afb5-5	0.0073926	0.377811	0.902523	0.421725	0.664742	0.0500282	0.108728	NA	0.0321163	0.0827194	NA
afb4-8	afb12*	0.481639	0.0490362	0.325306	0.0595127	0.524383	0.0194508	0.0560343	NA	0.0520899	0.0886289	NA
afb4-8	afb13	0.297492	0.46302	0.689717	0.0525159	0.333794	0.24364	0.30054	NA	0.430222	0.457535	NA
afb4-8	afb14	0.372801	0.648472	0.166649	0.837287	0.696875	0.976621	0.939845	NA	0.888173	0.957265	NA
afb4-8	afb15	0.0227666	0.569639	1	0.00455089	0.0430351	0.0308023	0.541265	NA	0.233214	0.182409	NA
afb4-8	afb23	0.0199164	0.110589	0.453918	5.13121e-07	0.0486651	0.000202194	8.64112e-05	NA	0.00185373	0.000497123	NA
afb4-8	afb2-1 3-1	0.0115348	0.0318358	0.336454	0.0124738	0.997843	0.00288972	2.58436e-08	NA	0.00287572	2.57941e-08	NA
afb4-8	afb24	0.111964	0.281264	0.222336	0.0277923	0.402608	0.0307413	0.002533	NA	0.0107922	0.0014333	NA
afb4-8	afb25	0.0330948	0.0211746	0.571917	8.52111e-05	0.528881	0.00354613	0.00171884	NA	0.00705136	0.00260519	NA
afb4-8	afb34	0.19985	0.0332526	0.371391	0.00495601	0.0446224	0.0567371	0.00434877	NA	0.349011	0.0273076	NA
afb4-8	afb35	0.00266965	0.382158	0.32822	1.72673e-06	0.923009	0.0192679	0.000935263	NA	0.0172196	0.000868877	NA
afb4-8	afb45	0.000462113	0.637706	0.216531	7.07632e-06	0.251202	0.537891	0.0192421	NA	0.241084	0.0101304	NA
afb4-8	afb124	0.139713	0.0949974	0.443841	0.399628	0.00170136	0.000369867	0.00639685	NA	0.0142604	0.0742265	NA
afb4-8	afb125*	0.00247958	0.304097	0.399758	0.0211331	0.0334705	0.000842729	9.84849e-06	NA	0.014216	8.13017e-05	NA
afb4-8	afb134	0.0466647	0.0917814	0.570086	0.680026	0.117247	0.00810943	0.015336	NA	0.0406116	0.0323611	NA
afb4-8	afb135	0.00103042	0.0506652	0.903579	0.000677305	0.675361	0.0219115	0.00428581	NA	0.0376254	0.00518912	NA
afb4-8	afb145	0.00620399	0.177244	0.124547	0.130917	0.101219	0.0221538	0.0119337	NA	0.111837	0.0223987	NA
afb4-8	afb234	0.0226203	0.407828	0.470658	2.65491e-06	0.154981	0.000626433	0.000240166	NA	0.00330563	0.000319323	NA
afb4-8	afb235	0.00111458	0.390617	0.586461	2.93647e-10	0.481884	0.00708503	1.15628e-07	NA	0.00282283	9.01899e-08	NA
afb4-8	afb245	0.00729002	0.6583	0.0808236	6.16229e-08	0.153807	0.109957	6.49284e-07	NA	0.0377866	1.6029e-07	NA
afb4-8	afb345	0.000324243	0.165155	0.0493317	1.50946e-08	0.108403	0.574301	0.000189502	NA	0.173283	1.85841e-05	NA
afb4-8	afb1234	0.0513594	0.095863	1	0.0168746	0.0948676	8.02883e-05	6.56032e-07	NA	0.000750684	1.99322e-06	NA
afb4-8	afb1235*	0.00194976	0.129923	0.458509	2.90869e-09	0.0821585	0.000122991	4.18013e-12	NA	0.000765216	2.87508e-11	NA
afb4-8	afb1245	0.00196058	0.400693	0.148464	3.67935e-07	0.771984	0.00144669	5.16774e-06	NA	0.00198901	6.31807e-06	NA
afb4-8	afb1345	4.26792e-05	0.308259	0.050862	0.0110773	0.278787	0.00427149	0.000446577	NA	0.0137544	0.00122928	NA
afb4-8	afb2345	1.7859e-06	6.01774e-06	0.034709	1.35585e-10	0.00278069	0.0842798	9.46754e-08	NA	0.00124233	1.24464e-10	NA
afb4-8	afb12345	1.927e-06	3.07449e-05	0.0205769	3.44252e-11	0.0457077	0.0254428	2.56132e-05	NA	0.00175917	7.86987e-06	NA
afb5-5	afb12*	0.0288994	0.380145	0.258358	0.332024	0.307595	0.432759	0.484275	NA	0.630003	0.777953	NA
afb5-5	afb13	0.0577567	0.681632	0.705662	0.353514	0.0386545	0.367398	0.595538	NA	0.0836185	0.327989	NA
afb5-5	afb14	0.330392	0.518137	0.101763	0.423616	0.945765	0.00450587	0.118299	NA	0.0041532	0.115107	NA
afb5-5	afb15	0.503399	0.556936	0.900967	0.105076	0.00266408	0.719862	0.0419699	NA	0.0372974	0.00801359	NA
afb5-5	afb23	0.367775	0.763546	0.417074	0.000122209	0.000565904	0.00174564	0.0112573	NA	0.049885	0.104522	NA
afb5-5	afb2-1 3-1	0.46653	0.297674	0.225598	0.190261	0.753582	0.0366936	1.27385e-06	NA	0.0748023	2.09757e-06	NA
afb5-5	afb24	0.0990896	0.928914	0.119177	0.160704	0.550296	0.714662	0.065085	NA	0.368253	0.0447443	NA
afb5-5	afb25	0.75227	0.194766	0.512626	0.00167358	0.108944	0.0384644	0.0628322	NA	0.225174	0.130996	NA
afb5-5	afb34	0.419106	0.250084	0.323997	0.0838477	0.00798255	0.771488	0.144855	NA	0.13029	0.690021	NA
afb5-5	afb35	0.93402	0.828612	0.192349	0.00104819	0.698153	0.406016	0.0386151	NA	0.629515	0.0498214	NA
afb5-5	afb45	0.144005	0.566081	0.126652	0.00296881	0.288604	0.027354	0.271278	NA	0.0974401	0.181759	NA
afb5-5	afb124	0.190965	0.505093	0.321737	1	9.66499e-06	5.94127e-05	0.193013	NA	0.500091	0.940434	NA
afb5-5	afb125*	0.697786	0.948893	0.179923	0.124093	0.00321615	0.00555208	0.00108822	NA	0.503147	0.0231597	NA
afb5-5	afb134	0.152091	0.709559	0.547439	0.787353	0.00782541	0.0727764	0.157888	NA	0.650655	0.394688	NA
afb5-5	afb135	0.576421	0.520397	0.735768	0.0385302	0.358705	0.494123	0.0334748	NA	0.849195	0.0537967	NA
afb5-5	afb145	0.663242	0.73537	0.0313968	0.599332	0.00516997	0.500059	0.0853094	NA	0.231955	0.209953	NA
afb5-5	afb234	0.611773	0.73084	0.243262	0.000955939	0.0173479	0.000460718	0.000708757	NA	0.0490171	0.00133532	NA
afb5-5	afb235	0.070809	0.725793	0.410983	1.41809e-06	0.674394	0.129556	1.79599e-06	NA	0.0752886	1.31674e-06	NA
afb5-5	afb245	0.48267	0.656744	0.0317103	6.47031e-05	0.120136	0.958021	0.000325079	NA	0.605989	8.18671e-05	NA
afb5-5	afb345	0.0309926	0.925308	0.0184109	3.78316e-05	0.063763	0.00833564	0.0818373	NA	0.0864609	0.0226167	NA
afb5-5	afb1234	0.11636	0.684251	0.849604	0.227558	0.00964071	3.06077e-05	3.21038e-05	NA	0.00503218	0.000405485	NA
afb5-5	afb1235*	0.324331	0.771351	0.296278	8.6457e-06	0.00098495	6.89987e-06	6.71117e-09	NA	0.00177221	1.93235e-07	NA
afb5-5	afb1245	0.348332	0.812813	0.108139	0.000135631	0.264454	0.00395505	0.000534747	NA	0.0213131	0.00119819	NA
afb5-5	afb1345	0.00945525	0.708384	0.0148542	0.0815687	0.0298252	0.040616	0.0496036	NA	0.497083	0.166903	NA
afb5-5	afb2345	0.00013961	0.00036479	0.0325892	2.66962e-07	0.000393314	0.491657	0.000316775	NA	0.00564542	1.30271e-06	NA
afb5-5	afb12345	0.000100129	0.00102241	0.0121433	1.80344e-07	0.035384	0.576245	0.00101609	NA	0.00678483	0.000160105	NA
afb12*	afb13	0.717803	0.107005	0.468077	0.916728	0.981302	0.141485	0.264366	NA	0.146531	0.267753	NA
afb12*	afb14	0.609576	0.062018	0.597709	0.0985195	0.321863	0.000649095	0.0581106	NA	0.00794805	0.110314	NA
afb12*	afb15	0.087082	0.0678403	0.319145	0.576007	0.353467	0.584134	0.0266674	NA	0.0763567	0.0154807	NA
afb12*	afb23	0.0930638	0.385738	0.80283	0.00164154	0.444957	0.00532462	0.15731	NA	0.0209463	0.287402	NA
afb12*	afb2-1 3-1	0.0250067	0.836882	0.878594	0.822718	0.581987	0.128727	0.000146105	NA	0.0263277	4.52342e-05	NA
afb12*	afb24	0.383624	0.215594	0.821518	0.590379	0.195916	0.606388	0.326879	NA	0.135132	0.11309	NA
afb12*	afb25	0.0666655	0.561376	0.48746	0.0156076	0.782444	0.151767	0.346703	NA	0.0819483	0.289967	NA
afb12*	afb34	0.380993	0.689382	0.950749	0.461575	0.287176	0.804025	0.579326	NA	0.221041	0.960618	NA
afb12*	afb35	0.0156989	0.184638	0.0506038	0.0141696	0.453754	0.931909	0.253668	NA	0.263394	0.136231	NA
afb12*	afb45	0.00211841	0.0833773	0.0367974	0.0382218	0.130834	0.00381854	0.750419	NA	0.186402	0.33201	NA
afb12*	afb124	0.369305	0.833744	0.622928	0.316319	0.0633531	0.000311781	0.674518	NA	0.184854	0.722111	NA
afb12*	afb125*	0.0119331	0.252943	0.040119	0.483188	0.280341	0.0223192	0.0285156	NA	0.249031	0.0951141	NA
afb12*	afb134	0.209889	0.426538	0.593859	0.248131	0.622071	0.347412	0.478541	NA	0.877519	0.595614	NA
afb12*	afb135	0.00718803	0.65345	0.17307	0.30302	0.769968	0.912527	0.125856	NA	0.755273	0.102034	NA
afb12*	afb145	0.0194379	0.546907	0.0094181	0.597811	0.59094	0.904529	0.257818	NA	0.437323	0.334992	NA
afb12*	afb234	0.0786371	0.120521	0.0526065	0.0128982	0.689367	0.00251027	0.00169753	NA	0.00983427	0.00213118	NA
afb12*	afb235	0.0024627	0.112482	0.105415	1.27556e-05	0.231723	0.366623	7.31239e-05	NA	0.0288987	1.04661e-05	NA
afb12*	afb245	0.0183083	0.163255	0.00912879	0.000847802	0.0912797	0.578036	0.0184909	NA	0.422051	0.00138368	NA
afb12*	afb345	0.00145646	0.262481	0.00558312	0.000401945	0.0710535	0.000706992	0.567892	NA	0.177658	0.110291	NA
afb12*	afb1234	0.240416	0.48056	0.187176	0.910608	0.524506	0.000137627	0.00162838	NA	0.000996187	0.00400022	NA
afb12*	afb1235*	0.00656368	0.41111	0.0766524	9.28165e-05	0.596247	3.1904e-05	8.65577e-06	NA	0.000202682	2.02382e-05	NA
afb12*	afb1245	0.00683415	0.18049	0.0414635	0.0018459	0.601258	0.0213277	0.017579	NA	0.00400303	0.00920571	NA
afb12*	afb1345	0.000312927	0.792377	0.00462557	0.369649	0.938093	0.176214	0.361287	NA	0.209287	0.380333	NA
afb12*	afb2345	1.22239e-05	8.43388e-05	0.0169603	1.1997e-06	0.00521748	0.104083	0.0252213	NA	0.000741589	9.2162e-05	NA
afb12*	afb12345	1.5092e-05	0.000342653	0.00414743	8.83987e-07	0.032714	0.670745	0.0190909	NA	0.000723894	0.000778072	NA
afb13	afb14	0.769889	0.698753	0.219599	0.100547	0.042695	0.130585	0.303298	NA	0.393484	0.525149	NA
afb13	afb15	0.165805	0.775789	0.685687	0.467638	0.0906336	0.227443	0.134279	NA	0.715459	0.0690921	NA
afb13	afb23	0.186433	0.266644	0.657934	0.000549526	0.0691374	0.000805126	0.00371024	NA	0.00306634	0.00958818	NA
afb13	afb2-1 3-1	0.0398304	0.0678549	0.486954	0.715751	0.482957	0.0156355	9.40893e-07	NA	0.00387945	3.75164e-07	NA
afb13	afb24	0.628953	0.641465	0.297338	0.510096	0.0356051	0.228521	0.0257333	NA	0.0169737	0.00698367	NA
afb13	afb25	0.100029	0.0437882	0.871348	0.00887694	0.565126	0.017772	0.0234514	NA	0.0108126	0.0184066	NA
afb13	afb34	0.523762	0.0695624	0.535033	0.367628	0.106039	0.336701	0.0568596	NA	0.854174	0.15959	NA
afb13	afb35	0.0351577	0.802552	0.139126	0.00541441	0.200294	0.12942	0.0140291	NA	0.0301796	0.00627165	NA
afb13	afb45	0.0045033	0.787659	0.0929147	0.017195	0.00322757	0.395254	0.127931	NA	0.693353	0.0387015	NA
afb13	afb124	0.56818	0.201641	0.670716	0.335552	0.000574586	0.000357081	0.0786399	NA	0.022632	0.336781	NA
afb13	afb125*	0.0256614	0.651779	0.134201	0.40943	0.0728796	0.00322215	0.00038778	NA	0.0306969	0.00181742	NA
afb13	afb134	0.391808	0.216691	0.836908	0.26235	0.303142	0.0367053	0.0776056	NA	0.0954425	0.10766	NA
afb13	afb135	0.0162283	0.107865	0.508393	0.213805	0.674041	0.161184	0.0169174	NA	0.0986179	0.0140474	NA
afb13	afb145	0.0363911	0.370979	0.0285118	0.650081	0.24896	0.163122	0.0451951	NA	0.345499	0.0615775	NA
afb13	afb234	0.146146	0.912765	0.174841	0.0051359	0.420641	0.00101207	0.000458449	NA	0.00264938	0.000531397	NA
afb13	afb235	0.00409204	0.907617	0.291816	1.97158e-06	0.0467895	0.0467992	1.07688e-06	NA	0.00417851	3.20246e-07	NA
afb13	afb245	0.0314078	0.89984	0.0244891	0.000223886	0.000324042	0.523958	0.000133414	NA	0.0997474	7.55541e-06	NA
afb13	afb345	0.00265355	0.409881	0.0143624	9.00385e-05	0.000117191	0.30495	0.0250537	NA	0.540036	0.00147858	NA
afb13	afb1234	0.447233	0.226862	0.575149	0.807639	0.239212	7.63258e-05	1.58136e-05	NA	0.000373869	3.78179e-05	NA
afb13	afb1235*	0.0127772	0.309152	0.211907	1.78305e-05	0.134312	7.1009e-05	2.36139e-08	NA	0.000242959	6.16002e-08	NA
afb13	afb1245	0.0134553	0.828745	0.0823861	0.000592898	0.257258	0.0040206	0.000205037	NA	0.00131151	0.00010625	NA
afb13	afb1345	0.000672365	0.48671	0.0124413	0.301196	0.825636	0.0202091	0.016198	NA	0.0246068	0.0181895	NA
afb13	afb2345	2.59297e-05	1.45459e-06	0.0260968	2.03292e-07	2.98852e-06	0.603363	0.000200663	NA	0.000537132	3.52149e-07	NA
afb13	afb12345	3.01898e-05	4.75432e-06	0.00880164	1.26561e-07	0.000805872	0.176248	0.000390514	NA	0.000762091	2.88687e-05	NA
afb14	afb15	0.548949	0.892444	0.161385	0.0255205	0.00291314	0.00098247	0.632536	NA	0.104015	0.218712	NA
afb14	afb23	0.611413	0.125574	0.456603	6.17793e-05	0.000595375	1.45073e-05	0.000140351	NA	0.000205547	0.00136076	NA
afb14	afb2-1 3-1	0.176728	0.0380795	0.446943	0.0474575	0.778524	7.09846e-05	2.91837e-08	NA	0.000131386	3.8634e-08	NA
afb14	afb24	0.989798	0.404297	0.703421	0.0466419	0.514076	0.00105476	0.00286278	NA	0.000316186	0.00197632	NA
afb14	afb25	0.283638	0.0268838	0.202329	0.000489658	0.120294	4.09246e-05	0.00207685	NA	0.000258462	0.00430129	NA
afb14	afb34	0.810485	0.0440067	0.578356	0.0207652	0.00862357	0.0197448	0.00533898	NA	0.298891	0.0440858	NA
afb14	afb35	0.299172	0.557586	0.022701	0.000445843	0.737097	0.000341135	0.00114928	NA	0.000612072	0.00141787	NA
afb14	afb45	0.093881	0.942715	0.0181014	0.00106742	0.256389	0.350795	0.0207004	NA	0.144571	0.0131644	NA
afb14	afb124	0.927524	0.129479	0.264298	0.411169	1.02358e-05	1.4886e-07	0.0078422	NA	0.00040891	0.109829	NA
afb14	afb125*	0.239578	0.437424	0.0147929	0.0357817	0.00350439	1.06672e-05	1.46585e-05	NA	0.00121436	0.000230121	NA
afb14	afb134	0.845753	0.0952308	0.293476	0.617136	0.0085888	5.97427e-05	0.0157743	NA	0.00294002	0.0409981	NA
afb14	afb135	0.212484	0.0430921	0.0666926	0.00959162	0.379566	0.00079544	0.00420977	NA	0.00440065	0.00600317	NA
afb14	afb145	0.232932	0.246783	0.00371894	0.191551	0.00566102	0.000811096	0.0119032	NA	0.031343	0.0266318	NA
afb14	afb234	0.500099	0.61146	0.0194288	0.000385847	0.0190171	7.14424e-07	0.000212314	NA	3.09829e-05	0.000308239	NA
afb14	afb235	0.0506688	0.586556	0.0452831	2.07808e-06	0.634204	0.000370401	9.40175e-08	NA	0.000200548	7.80181e-08	NA
afb14	afb245	0.181294	0.896645	0.00423132	4.32507e-05	0.100582	0.0597191	1.86634e-06	NA	0.0264569	5.43353e-07	NA
afb14	afb345	0.0536225	0.20546	0.00268117	3.24975e-05	0.0518674	0.35231	0.000608251	NA	0.063377	0.000117636	NA
afb14	afb1234	0.900975	0.111832	0.0690439	0.0575804	0.0105491	8.30812e-08	7.34402e-07	NA	4.28731e-06	4.34748e-06	NA
afb14	afb1235*	0.140388	0.166098	0.0336217	9.0297e-06	0.00100916	2.47964e-08	3.70914e-11	NA	1.57856e-06	7.17203e-10	NA
afb14	afb1245	0.147433	0.58414	0.0252129	7.13331e-05	0.290022	3.55621e-06	7.46414e-06	NA	1.38949e-05	1.35318e-05	NA
afb14	afb1345	0.0307969	0.395083	0.00208089	0.022312	0.0328982	2.81695e-05	0.000735546	NA	0.000540919	0.00299883	NA
afb14	afb2345	0.00382046	6.13616e-07	0.0127	5.19511e-07	0.000316253	0.00680097	1.20509e-06	NA	4.01942e-06	4.49065e-09	NA
afb14	afb12345	0.00279434	7.95046e-07	0.00242978	3.90607e-07	0.0309569	0.000545862	2.82839e-05	NA	6.4996e-06	8.22878e-06	NA
afb15	afb23	0.848005	0.134354	0.448536	0.00134044	0.675401	0.00224681	4.65815e-05	NA	0.00154646	3.78138e-05	NA
afb15	afb2-1 3-1	0.228531	0.0416724	0.32876	0.687286	0.121863	0.0436127	2.80875e-08	NA	0.000956883	1.20156e-08	NA
afb15	afb24	0.292538	0.446802	0.21533	0.920227	0.0029657	0.984099	0.00111335	NA	0.0010135	0.000254109	NA
afb15	afb25	0.437638	0.0297044	0.565319	0.0252866	0.0383141	0.0427002	0.000722192	NA	0.00148388	0.000294371	NA
afb15	afb34	0.713486	0.0483677	0.365887	0.804417	0.760205	0.937147	0.00171997	NA	0.903324	0.00209872	NA
afb15	afb35	0.406255	0.612703	0.322923	0.0151848	0.0171731	0.559122	0.000393307	NA	0.0012799	0.000109225	NA
afb15	afb45	0.045824	0.970173	0.21239	0.0540265	0.000339118	0.0056814	0.00863414	NA	0.914792	0.00193295	NA
afb15	afb124	0.447996	0.141232	0.435686	0.0908621	0.112886	1.18115e-05	0.00245109	NA	0.000580804	0.00551989	NA
afb15	afb125*	0.283711	0.480209	0.3923	0.769936	0.779635	0.00609749	5.48935e-06	NA	0.00974798	6.54621e-06	NA
afb15	afb134	0.443571	0.0999365	0.564825	0.0829244	0.442244	0.0612411	0.00770667	NA	0.00856377	0.00606975	NA
afb15	afb135	0.193306	0.0435827	0.902078	0.572501	0.12183	0.668954	0.00244063	NA	0.0387468	0.0014884	NA
afb15	afb145	0.301632	0.268918	0.119341	0.223467	0.469568	0.677082	0.00672537	NA	0.324438	0.00563978	NA
afb15	afb234	0.888349	0.680583	0.463698	0.0148693	0.382856	0.000226341	0.000173269	NA	3.54308e-05	0.000156175	NA
afb15	afb235	0.0276577	0.656446	0.581849	1.08743e-06	0.0037297	0.165165	8.64768e-08	NA	0.00156319	4.23546e-08	NA
afb15	afb245	0.220016	0.957735	0.0777442	0.000397566	0.000105435	0.787795	6.32228e-07	NA	0.109808	3.4226e-08	NA
afb15	afb345	0.0120068	0.223324	0.0471626	9.4495e-05	6.11837e-05	0.000501497	0.000106655	NA	0.650856	1.16419e-06	NA
afb15	afb1234	0.362012	0.120576	1	0.591067	0.651044	2.63076e-05	4.85362e-07	NA	1.2556e-05	4.03385e-07	NA
afb15	afb1235*	0.121502	0.181369	0.453284	1.62262e-05	0.351789	1.84671e-06	6.93383e-11	NA	4.06861e-07	3.50709e-11	NA
afb15	afb1245	0.130583	0.640909	0.146552	0.00139406	0.0153753	0.00270873	3.2529e-06	NA	1.99474e-05	1.09103e-06	NA
afb15	afb1345	0.00346847	0.417384	0.0483333	0.615044	0.13363	0.0411471	0.000178761	NA	0.0023586	7.09461e-05	NA
afb15	afb2345	7.18057e-05	6.05022e-07	0.0346172	5.10919e-08	8.90263e-07	0.188311	6.87568e-07	NA	1.38184e-06	1.38298e-10	NA
afb15	afb12345	6.07721e-05	2.83764e-07	0.0198806	2.63776e-08	7.4383e-05	0.825302	1.39123e-05	NA	2.6315e-07	2.60482e-06	NA
afb23	afb2-1 3-1	0.17357	0.266566	0.886664	0.000509973	0.153479	0.0832473	0.000362471	NA	0.650606	2.94322e-05	NA
afb23	afb24	0.33735	0.562619	0.625189	0.0165573	0.00250997	0.00235519	0.722483	NA	0.139876	0.367034	NA
afb23	afb25	0.359366	0.157032	0.716335	0.588897	0.0189861	0.0494819	0.633575	NA	0.264251	0.888963	NA
afb23	afb34	0.798187	0.23044	0.859419	0.00499138	0.509942	0.0111394	0.314367	NA	0.00507011	0.202351	NA
afb23	afb35	0.262236	0.469115	0.0841993	0.135265	0.0147383	0.00387784	0.843463	NA	0.0677712	0.458219	NA
afb23	afb45	0.0228925	0.200822	0.0578064	0.0400196	4.1901e-05	5.26079e-05	0.255268	NA	0.00289808	0.890437	NA
afb23	afb124	0.520912	0.580109	0.878722	6.85106e-05	0.016385	0.525206	0.244176	NA	0.0860777	0.0705373	NA
afb23	afb125*	0.178727	0.623198	0.0808195	0.0290152	0.48727	0.274395	0.22254	NA	0.148059	0.34853	NA
afb23	afb134	0.523453	0.905119	0.79898	0.000219787	0.604979	0.0115262	0.618838	NA	0.0178555	0.703472	NA
afb23	afb135	0.0978551	0.556368	0.293797	0.00341212	0.151243	0.00450813	0.527253	NA	0.0332507	0.284559	NA
afb23	afb145	0.212338	0.914551	0.0200935	0.000136821	0.64968	0.00444094	0.859461	NA	0.00643777	0.794157	NA
afb23	afb234	0.73953	0.306704	0.102757	0.20064	0.513208	0.303625	0.00737373	NA	0.480851	0.00605693	NA
afb23	afb235	0.018492	0.278695	0.1735	0.0152479	0.00285191	0.0341273	0.000271149	NA	0.706806	1.70356e-05	NA
afb23	afb245	0.158769	0.374226	0.0160756	0.882447	1.34144e-06	0.00971971	0.143709	NA	0.311347	0.00151241	NA
afb23	afb345	0.00453242	0.721203	0.0097127	0.621222	4.21915e-07	4.54231e-05	0.158256	NA	0.00273229	0.423236	NA
afb23	afb1234	0.421574	0.855837	0.326256	0.000356879	0.888911	0.816857	0.00864993	NA	0.758028	0.00766483	NA
afb23	afb1235*	0.0752129	1	0.126803	0.175284	0.428386	0.906958	1.8014e-06	NA	0.707399	1.03515e-06	NA
afb23	afb1245	0.0805445	0.456298	0.0553299	0.889723	0.00451151	0.120149	0.1351	NA	0.730152	0.0225636	NA
afb23	afb1345	0.00101735	0.832299	0.00880876	0.0369993	0.128456	0.0328419	0.497901	NA	0.107533	0.821878	NA
afb23	afb2345	1.7146e-05	2.21485e-06	0.0194661	5.18992e-05	1.21889e-07	0.000598036	0.196889	NA	0.993894	8.22906e-06	NA
afb23	afb12345	1.2211e-05	5.21185e-06	0.00585291	4.76442e-05	4.70398e-05	0.00257697	0.141565	NA	0.841761	0.00195431	NA
afb2-1 3-1	afb24	0.063734	0.145333	0.641814	0.689733	0.518468	0.047812	0.000834533	NA	0.232362	0.00303387	NA
afb2-1 3-1	afb25	0.756765	0.691541	0.487686	0.0125459	0.647625	0.814703	0.000388516	NA	0.449081	0.000168802	NA
afb2-1 3-1	afb34	0.214512	0.828944	0.944092	0.538256	0.102217	0.182001	9.31044e-05	NA	0.00680727	3.93206e-06	NA
afb2-1 3-1	afb35	0.47368	0.125799	0.0451413	0.00548164	0.943153	0.0840294	0.000747582	NA	0.100128	0.000864539	NA
afb2-1 3-1	afb45	0.674337	0.0533525	0.0357768	0.0208021	0.400533	0.000334033	0.000199187	NA	0.00272966	0.000894894	NA
afb2-1 3-1	afb124	0.0973856	0.688051	0.659956	0.171595	0.0188612	0.079874	5.89536e-05	NA	0.132411	9.4821e-07	NA
afb2-1 3-1	afb125*	0.638508	0.177835	0.0199314	0.560523	0.0949856	0.416017	0.00935548	NA	0.246676	0.000249686	NA
afb2-1 3-1	afb134	0.0904134	0.296636	0.638669	0.143985	0.243102	0.287678	0.00223029	NA	0.0190091	0.000339363	NA
afb2-1 3-1	afb135	0.671748	0.483017	0.139066	0.328312	0.733357	0.107593	0.055271	NA	0.0456613	0.0342278	NA
afb2-1 3-1	afb145	0.719943	0.42741	0.00415094	0.390904	0.22526	0.105838	0.0259426	NA	0.00619231	0.00511602	NA
afb2-1 3-1	afb234	0.278214	0.076647	0.0296524	0.0055843	0.283206	0.228133	0.293671	NA	0.816195	0.629996	NA
afb2-1 3-1	afb235	0.341326	0.0705278	0.0933386	4.443e-07	0.589311	0.573196	0.513205	NA	0.940557	0.242849	NA
afb2-1 3-1	afb245	0.935046	0.119259	0.0077891	0.000140771	0.306604	0.129188	0.00602375	NA	0.46828	0.0548362	NA
afb2-1 3-1	afb345	0.299101	0.173739	0.00495632	3.49727e-05	0.250253	0.000142502	1.06858e-05	NA	0.00201758	6.92046e-05	NA
afb2-1 3-1	afb1234	0.0771019	0.345507	0.135161	0.893083	0.200305	0.0159657	0.248026	NA	0.359955	0.024991	NA
afb2-1 3-1	afb1235*	0.942316	0.292686	0.068075	6.08461e-06	0.218097	0.0125369	0.111027	NA	0.291206	0.821914	NA
afb2-1 3-1	afb1245	0.980651	0.123291	0.0452003	0.000515014	0.832336	0.644337	0.0153756	NA	0.847485	0.0101845	NA
afb2-1 3-1	afb1345	0.135497	0.697903	0.00333602	0.424157	0.428191	0.66491	8.26687e-05	NA	0.17386	2.01225e-05	NA
afb2-1 3-1	afb2345	0.00433652	7.49839e-05	0.0196611	2.99194e-08	0.0248355	0.00648266	0.00123998	NA	0.529737	0.434733	NA
afb2-1 3-1	afb12345	0.00251016	0.000311613	0.00498587	1.46644e-08	0.122438	0.0467863	0.0326851	NA	0.677222	0.478713	NA
afb24	afb25	0.154315	0.0879708	0.259641	0.0746153	0.0761543	0.0482546	0.932645	NA	0.648147	0.48316	NA
afb24	afb34	0.734151	0.131956	0.78226	0.923881	0.00537594	0.946347	0.59871	NA	0.029875	0.0792375	NA
afb24	afb35	0.0556176	0.859082	0.0281162	0.101301	0.399411	0.590659	0.882135	NA	0.556178	0.841872	NA
afb24	afb45	0.00570378	0.493449	0.0236566	0.208665	0.802995	0.0063229	0.485345	NA	0.0104902	0.53791	NA
afb24	afb124	0.867073	0.352496	0.350718	0.15013	6.38416e-05	1.72791e-05	0.505695	NA	0.713307	0.0339116	NA
afb24	afb125*	0.0405151	0.97705	0.0107431	0.869725	0.0027605	0.00678326	0.182793	NA	0.906692	0.855042	NA
afb24	afb134	0.689585	0.489337	0.404631	0.122004	0.00901555	0.0783502	0.858358	NA	0.0759577	0.305874	NA
afb24	afb135	0.0200653	0.281125	0.0735634	0.75809	0.211838	0.690342	0.415219	NA	0.24017	0.727679	NA
afb24	afb145	0.0606366	0.597578	0.00246678	0.29984	0.00710968	0.698355	0.693758	NA	0.0237855	0.688747	NA
afb24	afb234	0.254406	0.71114	0.0158348	0.0903085	0.0148515	0.000288516	0.0056922	NA	0.194966	0.0214164	NA
afb24	afb235	0.0062439	0.69784	0.0556239	0.000279435	0.872893	0.175744	0.00042333	NA	0.223301	0.000521066	NA
afb24	afb245	0.0513413	0.646715	0.00501805	0.0106742	0.584105	0.782039	0.132681	NA	0.990362	0.08381	NA
afb24	afb345	0.00206472	0.778835	0.0032576	0.00573555	0.440065	0.000676289	0.482283	NA	0.00419684	0.69176	NA
afb24	afb1234	0.784879	0.477751	0.0668806	0.617727	0.00840086	2.87046e-05	0.0114013	NA	0.0187831	0.18083	NA
afb24	afb1235*	0.0198174	0.592381	0.0414792	0.0016391	0.0049799	2.34846e-06	2.30767e-05	NA	0.00580683	0.00112986	NA
afb24	afb1245	0.0208619	0.837659	0.0336308	0.0189768	0.153039	0.00340742	0.119966	NA	0.0843631	0.321254	NA
afb24	afb1345	0.000426906	0.634908	0.00212794	0.737372	0.0280935	0.0482632	0.839105	NA	0.806596	0.301103	NA
afb24	afb2345	1.12028e-05	5.1103e-06	0.0163563	1.97278e-05	0.0110139	0.200625	0.184041	NA	0.0211172	0.00560961	NA
afb24	afb12345	1.07067e-05	2.32167e-05	0.00360574	1.72986e-05	0.176046	0.851926	0.119964	NA	0.0241738	0.0305418	NA
afb25	afb34	0.356512	0.872231	0.571014	0.049788	0.0570307	0.220658	0.643132	NA	0.0189961	0.230281	NA
afb25	afb35	0.780462	0.0768113	0.0879266	0.557581	0.375613	0.0895688	0.808107	NA	0.322965	0.59323	NA
afb25	afb45	0.468029	0.0346361	0.0643287	0.294661	0.0106995	0.000187137	0.518534	NA	0.00726333	0.985991	NA
afb25	afb124	0.209128	0.461185	0.723077	0.00128501	0.000184072	0.0265529	0.541666	NA	0.420236	0.100332	NA
afb25	afb125*	0.95162	0.107838	0.0488995	0.111176	0.0339756	0.272561	0.136612	NA	0.618874	0.515607	NA
afb25	afb134	0.210625	0.174054	0.935178	0.00170876	0.133322	0.357027	0.911585	NA	0.0531855	0.655194	NA
afb25	afb135	0.993597	0.284427	0.326695	0.0553375	0.932121	0.124644	0.369912	NA	0.143449	0.356866	NA
afb25	afb145	0.988628	0.272953	0.00888088	0.00316441	0.101513	0.122406	0.641751	NA	0.0167492	0.877991	NA
afb25	afb234	0.504181	0.0490229	0.0730156	0.649564	0.210583	0.107877	0.0049552	NA	0.489563	0.00761503	NA
afb25	afb235	0.241593	0.0462047	0.190234	0.0177375	0.100937	0.704715	0.000224912	NA	0.420724	4.34479e-05	NA
afb25	afb245	0.801437	0.0753289	0.0147129	0.492141	0.00141786	0.155744	0.0912407	NA	0.808833	0.00824254	NA
afb25	afb345	0.216515	0.104579	0.00913307	0.334008	0.000535712	4.54275e-05	0.51693	NA	0.00412458	0.626599	NA
afb25	afb1234	0.184202	0.204217	0.352145	0.00976606	0.114872	0.00533638	0.00665048	NA	0.0706687	0.0264126	NA
afb25	afb1235*	0.680182	0.173762	0.135701	0.112223	0.0334039	0.00297588	6.65474e-06	NA	0.03826	3.43242e-05	NA
afb25	afb1245	0.710742	0.0753944	0.0688618	0.658348	0.567383	0.428495	0.0850117	NA	0.260264	0.062089	NA
afb25	afb1345	0.107602	0.535805	0.00643981	0.141669	0.44291	0.836309	0.906448	NA	0.506191	0.749463	NA
afb25	afb2345	0.0057186	0.00023654	0.0256492	0.000392023	8.97685e-06	0.00426691	0.124749	NA	0.102588	0.000219459	NA
afb25	afb12345	0.00351437	0.000870796	0.00801623	0.000380093	0.00198591	0.0437772	0.088665	NA	0.136398	0.00444705	NA
afb34	afb35	0.374563	0.114044	0.0659741	0.0493956	0.0240507	0.831216	0.481953	NA	0.052084	0.0916197	NA
afb34	afb45	0.0990899	0.0548003	0.0460156	0.137472	0.00177044	0.0694065	0.820243	NA	0.857959	0.290896	NA
afb34	afb124	0.838955	0.57012	0.709872	0.0728816	0.336664	0.0100285	0.877536	NA	0.0396549	0.617291	NA
afb34	afb125*	0.292843	0.155277	0.0622395	0.925645	0.958299	0.0542378	0.0496471	NA	0.0504885	0.0470686	NA
afb34	afb134	0.911409	0.254072	0.661392	0.0664301	0.354441	0.419787	0.788108	NA	0.15446	0.5782	NA
afb34	afb135	0.252566	0.395165	0.226091	0.796382	0.108753	0.860459	0.221751	NA	0.153756	0.0843481	NA
afb34	afb145	0.28645	0.354462	0.0160586	0.175416	0.373577	0.865687	0.430341	NA	0.477624	0.309698	NA
afb34	afb234	0.647853	0.0775706	0.078756	0.0450051	0.312152	0.0250624	0.00297832	NA	0.00496817	0.00197507	NA
afb34	afb235	0.0508247	0.0738375	0.135207	1.28781e-05	0.0068543	0.375241	6.46733e-05	NA	0.00713038	2.51003e-06	NA
afb34	afb245	0.218624	0.103735	0.0128552	0.00215354	0.000941939	0.78599	0.0278362	NA	0.131712	0.000159552	NA
afb34	afb345	0.0503059	0.159033	0.00785569	0.000744361	0.000648516	0.0470698	0.929868	NA	0.709318	0.0477996	NA
afb34	afb1234	0.845523	0.289705	0.249361	0.460127	0.501269	0.00237094	0.00184208	NA	0.000724377	0.000812408	NA
afb34	afb1235*	0.160891	0.248319	0.0990172	0.000143759	0.304095	0.00230757	1.28771e-06	NA	0.000477603	2.90042e-07	NA
afb34	afb1245	0.169953	0.111649	0.0461862	0.00555913	0.0299913	0.0787136	0.0283438	NA	0.00250052	0.00242492	NA
afb34	afb1345	0.0262287	0.610007	0.00714357	0.773072	0.139112	0.257587	0.69397	NA	0.0424123	0.304856	NA
afb34	afb2345	0.00234844	0.000313104	0.0172521	6.24022e-07	1.67501e-05	0.45919	0.0355812	NA	0.00104441	2.02267e-06	NA
afb34	afb12345	0.00173835	0.00107792	0.00484859	4.18352e-07	0.000287598	0.982526	0.0329615	NA	0.00144915	0.000299368	NA
afb35	afb45	0.112728	0.636197	0.714255	0.453339	0.217597	0.00159316	0.388351	NA	0.0202629	0.647569	NA
afb35	afb124	0.142875	0.302098	0.0622898	0.000611862	0.000281715	2.29981e-05	0.397564	NA	0.792711	0.0359802	NA
afb35	afb125*	0.718813	0.848094	0.737431	0.159136	0.0146238	0.012268	0.217563	NA	0.732808	0.966682	NA
afb35	afb134	0.0833337	0.408213	0.104	0.00159213	0.0539823	0.163845	0.755215	NA	0.158046	0.371949	NA
afb35	afb135	0.558655	0.239795	0.286139	0.0416604	0.578946	0.965109	0.471922	NA	0.447459	0.602147	NA
afb35	afb145	0.683443	0.515144	0.561623	0.00130945	0.0433167	0.95562	0.771078	NA	0.0470922	0.801146	NA
afb35	afb234	0.521516	0.874647	0.643812	0.864173	0.0815644	0.000513724	0.00653237	NA	0.0478972	0.0150291	NA
afb35	afb235	0.0634125	0.869487	0.602202	4.03116e-05	0.488773	0.287891	0.000407868	NA	0.102433	0.000171609	NA
afb35	afb245	0.487474	0.760725	0.34544	0.0631163	0.112207	0.589899	0.157082	NA	0.775061	0.0374518	NA
afb35	afb345	0.0113661	0.649889	0.215217	0.0122925	0.0711034	6.33843e-05	0.352321	NA	0.007156	0.860785	NA
afb35	afb1234	0.0557065	0.400494	0.2167	0.00373981	0.0463627	5.63917e-05	0.0123758	NA	0.00435174	0.0977975	NA
afb35	afb1235*	0.306571	0.497851	0.77541	0.00160512	0.0273505	3.72394e-06	1.10566e-05	NA	0.000641468	0.000201672	NA
afb35	afb1245	0.331136	0.977775	0.431407	0.157892	0.629919	0.00645106	0.141933	NA	0.0185349	0.19745	NA
afb35	afb1345	0.00266987	0.575602	0.231666	0.206417	0.159941	0.0937198	0.702066	NA	0.75933	0.373534	NA
afb35	afb2345	2.26141e-05	1.08306e-05	0.0788105	2.79264e-08	0.000931148	0.0487822	0.219198	NA	0.00278549	0.00129187	NA
afb35	afb12345	8.67892e-06	5.20791e-05	0.0766462	1.61186e-08	0.0317051	0.652371	0.141872	NA	0.0019126	0.0151343	NA
afb45	afb124	0.0201827	0.158336	0.049028	0.00186361	1.18325e-06	1.59782e-07	0.93185	NA	0.0132621	0.151592	NA
afb45	afb125*	0.224814	0.512186	0.47381	0.304955	0.000532266	4.57714e-05	0.0466089	NA	0.0298001	0.589055	NA
afb45	afb134	0.00732767	0.164681	0.0711272	0.00387983	0.000767876	0.000146552	0.659292	NA	0.0935509	0.673515	NA
afb45	afb135	0.193923	0.0857792	0.183217	0.144234	0.116865	0.00474237	0.184041	NA	0.114856	0.395507	NA
afb45	afb145	0.339235	0.292961	0.905263	0.00443093	0.000478225	0.00484161	0.360288	NA	0.504417	0.897237	NA
afb45	afb234	0.0693034	0.70908	0.410577	0.391214	0.00220468	1.40181e-06	0.00246004	NA	0.000754687	0.0092556	NA
afb45	afb235	0.450352	0.695449	0.39685	5.53471e-06	0.660309	0.00179573	0.000103921	NA	0.00341629	0.000165199	NA
afb45	afb245	0.573664	0.941647	0.597662	0.0131415	0.710919	0.164029	0.0299004	NA	0.13516	0.0231793	NA
afb45	afb345	0.308261	0.304995	0.408006	0.00151554	0.501064	0.87357	0.84753	NA	0.817511	0.699264	NA
afb45	afb1234	0.00509514	0.172138	0.142407	0.0145259	0.00130189	2.19374e-07	0.00246961	NA	9.04715e-05	0.0547015	NA
afb45	afb1235*	0.659508	0.233906	0.527908	0.00022091	8.68007e-05	2.70253e-08	9.87531e-06	NA	2.41604e-05	0.000422111	NA
afb45	afb1245	0.610585	0.660522	0.626787	0.0448516	0.0322715	9.98259e-06	0.0284965	NA	0.000325586	0.107188	NA
afb45	afb1345	0.0861706	0.420314	0.447719	0.390817	0.0026243	0.000114226	0.552196	NA	0.017906	0.770009	NA
afb45	afb2345	0.00032494	2.83321e-06	0.111105	4.97889e-09	0.00474086	0.0450346	0.0406765	NA	7.36026e-05	0.00179625	NA
afb45	afb12345	0.000126837	1.31657e-05	0.148471	2.44069e-09	0.182706	0.00246731	0.0309212	NA	8.8956e-05	0.00920489	NA
afb124	afb125*	0.10198	0.388835	0.0234341	0.115224	0.248209	0.427086	0.0360441	NA	0.869747	0.0137044	NA
afb124	afb134	0.877461	0.630525	0.863473	0.781563	0.0129049	0.000148294	0.695614	NA	0.0858	0.348915	NA
afb124	afb135	0.0729254	0.871591	0.193598	0.030529	0.00785403	0.000214946	0.186884	NA	0.332743	0.0455375	NA
afb124	afb145	0.115458	0.710571	0.0052745	0.585009	0.0127617	0.00020808	0.373993	NA	0.0288311	0.184404	NA
afb124	afb234	0.392007	0.223827	0.0369346	0.000571726	0.0130793	0.465793	0.00253371	NA	0.0730438	0.0012379	NA
afb124	afb235	0.0121519	0.215016	0.128368	5.47015e-07	6.11699e-05	0.0228948	4.36087e-05	NA	0.132835	9.31558e-07	NA
afb124	afb245	0.0882299	0.24695	0.01159	3.19695e-05	2.7077e-07	0.0133598	0.0192328	NA	0.855657	3.11418e-05	NA
afb124	afb345	0.00941241	0.430443	0.00761836	1.76672e-05	1.64845e-07	2.53606e-09	0.917915	NA	0.0037671	0.0116137	NA
afb124	afb1234	0.966381	0.68006	0.181632	0.207713	0.0445947	0.219381	0.00125116	NA	0.00639761	0.000194491	NA
afb124	afb1235*	0.0467361	0.596804	0.0935133	3.69693e-06	0.00324886	0.206825	6.41906e-07	NA	0.00100652	3.07533e-08	NA
afb124	afb1245	0.0498818	0.294933	0.0577976	7.3987e-05	5.57826e-05	0.0972762	0.020161	NA	0.0282357	0.000615456	NA
afb124	afb1345	0.00326458	0.903893	0.00516034	0.0741345	0.00118007	0.00813119	0.577632	NA	0.93134	0.122483	NA
afb124	afb2345	0.000141407	0.000206326	0.0236878	1.12513e-07	6.43012e-09	2.97243e-07	0.0239222	NA	0.00444022	2.21267e-07	NA
afb124	afb12345	0.000138766	0.00071156	0.00743919	6.93845e-08	1.20663e-06	4.81124e-06	0.0242405	NA	0.00316413	0.000114038	NA
afb125*	afb134	0.0602106	0.555068	0.0928406	0.0947582	0.323506	0.0495079	0.184802	NA	0.21668	0.312216	NA
afb125*	afb135	0.897376	0.346298	0.313833	0.920322	0.0924612	0.0180036	0.878937	NA	0.377964	0.599335	NA
afb125*	afb145	0.918106	0.633876	0.248011	0.23361	0.342263	0.0176571	0.567209	NA	0.0715158	0.764241	NA
afb125*	afb234	0.373158	0.715357	0.857917	0.141933	0.281613	0.807208	0.0235062	NA	0.238648	0.0139889	NA
afb125*	afb235	0.105018	0.705127	0.775797	0.000583585	0.00350138	0.181479	0.0043772	NA	0.234528	8.06008e-05	NA
afb125*	afb245	0.676397	0.646624	0.160583	0.0195506	0.000229154	0.0429793	0.927307	NA	0.936476	0.0178751	NA
afb125*	afb345	0.0351462	0.825723	0.0896511	0.0108693	0.000146772	2.15063e-05	0.0141118	NA	0.0232363	0.786976	NA
afb125*	afb1234	0.0424202	0.536838	0.194799	0.49729	0.489821	0.101897	0.126051	NA	0.0314055	0.0631235	NA
afb125*	afb1235*	0.489085	0.644483	1	0.00326224	0.25483	0.098549	7.87013e-05	NA	0.0162	1.4369e-05	NA
afb125*	afb1245	0.524679	0.828278	0.294287	0.0332271	0.0153827	0.623964	0.800106	NA	0.119704	0.150119	NA
afb125*	afb1345	0.00949046	0.652561	0.0854194	0.869076	0.103049	0.183955	0.0772466	NA	0.930819	0.273346	NA
afb125*	afb2345	7.96022e-05	1.92129e-05	0.0622453	3.90072e-05	2.48381e-06	0.000862379	0.751201	NA	0.0437697	0.000140363	NA
afb125*	afb12345	4.38746e-05	8.88195e-05	0.0394601	3.52267e-05	9.33679e-05	0.0064789	0.725109	NA	0.0571412	0.00989082	NA
afb134	afb135	0.0242064	0.627129	0.381814	0.0339675	0.291818	0.279564	0.370699	NA	0.806532	0.236391	NA
afb134	afb145	0.090666	0.978341	0.0198147	0.446579	0.94053	0.273924	0.61274	NA	0.248048	0.622198	NA
afb134	afb234	0.382189	0.250456	0.122303	0.00140743	0.879815	0.00339951	0.00535323	NA	0.00246801	0.00505395	NA
afb134	afb235	0.00894879	0.221834	0.220129	5.62536e-06	0.0115525	0.742756	0.000997238	NA	0.0231397	6.49164e-05	NA
afb134	afb245	0.0748436	0.334488	0.0181164	0.000144225	0.000140561	0.288989	0.146259	NA	0.436273	0.00896144	NA
afb134	afb345	0.00146911	0.625769	0.0107422	9.59852e-05	6.76757e-05	1.11937e-06	0.712872	NA	0.049447	0.371294	NA
afb134	afb1234	0.876179	0.940671	0.427331	0.170556	0.785836	0.000287804	0.0181134	NA	0.000450987	0.0221837	NA
afb134	afb1235*	0.0288394	0.914733	0.159046	2.66723e-05	0.993712	2.36432e-05	0.00016121	NA	2.39144e-05	0.000162067	NA
afb134	afb1245	0.030384	0.397323	0.0679077	0.000251942	0.0519367	0.0415156	0.130228	NA	0.0011417	0.0455489	NA
afb134	afb1345	0.000268239	0.869973	0.00907615	0.063126	0.418216	0.433627	0.980617	NA	0.14388	0.828546	NA
afb134	afb2345	5.73745e-06	1.96926e-06	0.0232206	1.0563e-06	1.08843e-06	0.000942831	0.199046	NA	9.20877e-05	0.000687971	NA
afb134	afb12345	3.54089e-06	3.43041e-06	0.00708953	8.17976e-07	0.000196436	0.0386908	0.125806	NA	1.13068e-05	0.00381125	NA
afb135	afb145	0.99078	0.766289	0.0581512	0.0817628	0.262756	0.991933	0.728344	NA	0.27969	0.513264	NA
afb135	afb234	0.27689	0.124741	0.40524	0.0399508	0.356381	0.00182004	0.0309692	NA	0.021714	0.054328	NA
afb135	afb235	0.100969	0.104109	0.583812	1.26367e-06	0.259849	0.319804	0.025991	NA	0.0480453	0.006943	NA
afb135	afb245	0.714422	0.219533	0.0494715	0.000928812	0.0685891	0.623747	0.828876	NA	0.524629	0.316194	NA
afb135	afb345	0.00636007	0.341198	0.028184	0.000158138	0.0482353	0.000881244	0.17152	NA	0.0986601	0.486876	NA
afb135	afb1234	0.0133611	0.711519	0.853797	0.26422	0.233493	0.000104703	0.233159	NA	0.0021065	0.487515	NA
afb135	afb1235*	0.498067	0.596462	0.431123	2.59419e-05	0.239983	2.23539e-05	0.00669777	NA	0.000503556	0.0209742	NA
afb135	afb1245	0.538018	0.234562	0.140527	0.00356506	0.80497	0.0160643	0.748173	NA	0.00888547	0.67998	NA
afb135	afb1345	0.00190813	0.973852	0.0241583	0.917467	0.585063	0.142709	0.310358	NA	0.349138	0.241143	NA
afb135	afb2345	1.6438e-05	2.74015e-06	0.037984	2.5616e-08	0.00150208	0.128638	0.988506	NA	0.00181553	0.0638564	NA
afb135	afb12345	1.07378e-06	4.95256e-06	0.0161913	1.22e-08	0.0206717	0.770109	0.694972	NA	0.00188953	0.129761	NA
afb145	afb234	0.378845	0.408721	0.19985	0.00128152	0.820853	0.0017689	0.0175443	NA	0.0011457	0.0159734	NA
afb145	afb235	0.152751	0.39765	0.23791	4.65642e-07	0.00896896	0.315766	0.0120863	NA	0.00776233	0.000953431	NA
afb145	afb245	0.767068	0.404763	0.596735	5.09222e-05	7.67667e-05	0.628043	0.516407	NA	0.233195	0.072978	NA
afb145	afb345	0.0929008	0.725368	0.369252	2.13893e-05	3.64084e-05	0.000900942	0.365653	NA	0.5795	0.874124	NA
afb145	afb1234	0.0716056	0.979191	0.0308487	0.460127	0.831262	0.000102206	0.120861	NA	0.000147984	0.135431	NA
afb145	afb1235*	0.603747	0.918514	0.363614	4.08146e-06	0.925983	2.16756e-05	0.00303928	NA	1.89894e-05	0.002888	NA
afb145	afb1245	0.640641	0.502976	0.651085	0.000142799	0.0366372	0.015659	0.461833	NA	0.000483854	0.22195	NA
afb145	afb1345	0.032883	0.8918	0.403576	0.159346	0.357516	0.139955	0.572798	NA	0.0428748	0.699834	NA
afb145	afb2345	0.000556698	0.000138549	0.113705	6.943e-08	7.52429e-07	0.131199	0.652352	NA	7.00658e-05	0.00990478	NA
afb145	afb12345	0.000366841	0.000492675	0.123876	3.92e-08	0.000149033	0.779572	0.429955	NA	5.56244e-05	0.0277258	NA
afb234	afb235	0.0373958	1	0.887918	0.000179631	0.0192848	0.0751157	0.50837	NA	0.757345	0.781877	NA
afb234	afb245	0.275354	0.839783	0.133845	0.113167	0.000651502	0.0256077	0.0240528	NA	0.524069	0.135655	NA
afb234	afb345	0.019423	0.4686	0.0747952	0.034121	0.000365386	1.4026e-07	0.00272507	NA	0.000153891	0.0107054	NA
afb234	afb1234	0.312858	0.259856	0.271106	0.00387648	0.691509	0.085912	0.109918	NA	0.164931	0.0904969	NA
afb234	afb1235*	0.165427	0.351008	0.891414	0.00498912	0.841734	0.0677779	0.73094	NA	0.0912183	0.693719	NA
afb234	afb1245	0.177699	0.900742	0.261704	0.235039	0.0947596	0.348312	0.0297043	NA	0.583826	0.0599838	NA
afb234	afb1345	0.00626996	0.514784	0.0703246	0.183793	0.54547	0.0495431	0.00419203	NA	0.131716	0.0050663	NA
afb234	afb2345	0.000146063	1.38092e-06	0.0572189	4.10455e-07	4.89722e-06	1.23995e-05	0.0166771	NA	0.251929	0.383025	NA
afb234	afb12345	0.000121458	4.09334e-06	0.0340432	2.69971e-07	0.000409972	0.000177467	0.0360239	NA	0.346608	0.372447	NA
afb235	afb245	0.270995	0.835885	0.149314	0.00915588	0.450175	0.262085	0.0032505	NA	0.443446	0.0077624	NA
afb235	afb345	0.89305	0.439484	0.0874782	0.00732713	0.325612	0.000839209	2.02233e-05	NA	0.00293897	4.17632e-05	NA
afb235	afb1234	0.0076958	0.237033	0.46805	3.04077e-07	0.0108554	0.00470109	0.102701	NA	0.423266	0.00375581	NA
afb235	afb1235*	0.293838	0.329204	0.812099	0.142311	0.00556275	0.00350667	0.50187	NA	0.357295	0.25834	NA
afb235	afb1245	0.269357	0.896755	0.251336	0.00791082	0.201607	0.276058	0.00693962	NA	0.921987	0.00166869	NA
afb235	afb1345	0.559734	0.511452	0.089201	0.000615545	0.0368195	0.825868	7.5885e-05	NA	0.169386	1.14921e-05	NA
afb235	afb2345	0.00724554	8.52119e-07	0.0525715	0.00225171	0.00641546	0.031532	0.00105473	NA	0.60916	0.0604171	NA
afb235	afb12345	0.00303062	1.21893e-06	0.0348563	0.00294118	0.129062	0.182856	0.0137841	NA	0.763372	0.104212	NA
afb245	afb345	0.211062	0.494581	0.730343	0.698123	0.722594	0.128695	0.00337852	NA	0.150343	0.00460163	NA
afb245	afb1234	0.0618014	0.32625	0.0354511	9.47433e-05	0.00041636	0.00374364	0.112218	NA	0.181466	0.629589	NA
afb245	afb1235*	0.86098	0.391816	0.223142	0.166794	1.15796e-06	0.00445248	1.32107e-05	NA	0.160158	0.0125684	NA
afb245	afb1245	0.901752	0.779867	0.931805	0.758043	0.00538458	0.0635377	0.850671	NA	0.371771	0.357163	NA
afb245	afb1345	0.0853336	0.474232	0.807845	0.0245045	0.000324993	0.180815	0.0404242	NA	0.890724	0.00118618	NA
afb245	afb2345	0.00190963	0.000106554	0.168379	5.99909e-06	0.00527204	0.730772	0.61163	NA	0.246782	0.104507	NA
afb245	afb12345	0.00114742	0.000362851	0.269647	5.27853e-06	0.245816	0.710804	0.764426	NA	0.299357	0.366645	NA
afb345	afb1234	0.000739934	0.60508	0.0208383	2.35081e-05	0.0002386	1.12181e-07	0.000340916	NA	3.26153e-05	0.0239023	NA
afb345	afb1235*	0.192555	0.748505	0.134009	0.216769	2.55665e-07	1.64269e-09	1.392e-09	NA	2.02757e-06	4.10594e-07	NA
afb345	afb1245	0.167636	0.631557	0.86477	0.488595	0.00205547	9.28711e-07	0.00659052	NA	7.36854e-05	0.0690143	NA
afb345	afb1345	0.149943	0.720265	0.903927	0.0131487	0.000129314	1.06355e-05	0.540841	NA	0.00877155	0.325652	NA
afb345	afb2345	0.00042342	1.43593e-06	0.220671	8.43533e-08	0.0089111	0.00649436	0.000978727	NA	7.31251e-06	4.01011e-06	NA
afb345	afb12345	1.10018e-05	2.42413e-06	0.408203	1.16775e-07	0.338678	6.30645e-05	0.0117647	NA	3.33641e-06	0.00498493	NA
afb1234	afb1235*	0.0221384	0.868071	0.335689	4.09777e-06	0.744281	0.857281	0.00831113	NA	0.949521	0.00558692	NA
afb1234	afb1245	0.0231195	0.389952	0.120314	0.000355512	0.0510915	0.0176742	0.186569	NA	0.3737	0.665691	NA
afb1234	afb1345	0.000124645	0.897175	0.0162461	0.369052	0.322773	0.00208477	0.00232405	NA	0.0124582	0.00597455	NA
afb1234	afb2345	3.10911e-06	4.62433e-06	0.0358712	2.27888e-08	3.17391e-06	3.73475e-06	0.0354053	NA	0.660094	0.0438704	NA
afb1234	afb12345	1.27669e-06	1.70124e-05	0.0143731	1.08499e-08	0.000235843	3.1922e-05	0.269213	NA	0.442444	0.214374	NA
afb1235*	afb1245	0.952084	0.484547	0.323252	0.117464	0.00681143	0.00983446	0.000141622	NA	0.273198	0.00192761	NA
afb1235*	afb1345	0.0636222	0.835016	0.140786	0.00376645	0.253096	0.000708546	2.20539e-07	NA	0.00364526	6.19843e-07	NA
afb1235*	afb2345	0.000612103	6.41079e-06	0.0628325	4.34483e-05	6.67749e-07	1.03428e-07	3.3046e-07	NA	0.554716	0.179763	NA
afb1235*	afb12345	0.000339661	2.73778e-05	0.0499472	5.01858e-05	0.000118621	1.37419e-06	0.000767404	NA	0.308992	0.336961	NA
afb1245	afb1345	0.0543694	0.566301	0.930223	0.0424352	0.195881	0.27701	0.0427311	NA	0.0558367	0.0175964	NA
afb1245	afb2345	0.000510247	1.23858e-05	0.216814	1.78624e-05	2.33903e-05	0.000136397	0.515875	NA	0.581967	0.0157391	NA
afb1245	afb12345	0.000285648	5.92682e-05	0.41778	1.56118e-05	0.00472317	0.00217531	0.902814	NA	0.78323	0.118418	NA
afb1345	afb2345	0.000724822	0.00507617	0.198317	3.52254e-05	2.5556e-06	0.00251163	0.0479766	NA	0.0132986	5.43604e-06	NA
afb1345	afb12345	3.81691e-05	0.00947048	0.341314	3.15243e-05	0.000631997	0.038885	0.0507135	NA	0.0148596	0.00149858	NA
afb2345	afb12345	0.133795	0.151503	0.469063	1	0.214034	0.0782191	0.479567	NA	0.71591	0.84494	NA
Col-0 c	tir1-1 c	0.00435511	0.504728	0.24181	3.59177e-06	0.00168321	0.315917	0.000103745	0.00226633	0.00802598	1.15778e-05	0.00120464
Col-0 c	afb12	0.477278	0.10844	0.345839	0.550757	0.00765856	2.90144e-06	0.00553716	0.0010302	0.00147513	0.0350037	0.0093204
Col-0 c	afb123	0.388813	0.0389077	0.377428	0.000318037	0.621873	2.54131e-07	2.96994e-05	0.0054413	1.02506e-06	4.70774e-05	0.00617972
Col-0 c	afb125	0.00229184	0.175581	0.00513661	0.000178748	0.010707	4.73425e-05	2.69552e-05	1.5506e-07	0.0395711	0.000714158	8.09167e-07
Col-0 c	tir1afb12	0.00813518	0.378935	0.326399	1.06497e-08	0.0359415	1.44259e-10	1.90376e-14	1.20094e-05	1.28634e-08	2.83541e-13	1.58691e-05
tir1-1 c	afb12	0.00801253	0.0805417	0.830225	4.75326e-08	5.50256e-05	6.66828e-06	0.130058	0.0658903	0.626035	0.00138174	0.0107285
tir1-1 c	afb123	0.00253229	0.0323368	0.926039	0.147248	0.0389985	6.0426e-07	0.255504	0.662572	0.00110933	0.999518	0.940593
tir1-1 c	afb125	0.504373	0.11609	0.0189202	0.237399	0.000371232	0.000234166	0.535992	0.537727	0.521266	0.0637308	0.411909
tir1-1 c	tir1afb12	1	0.851728	0.824878	0.0104051	0.00013306	2.31634e-11	3.58368e-12	0.00145094	5.7432e-06	9.38259e-09	0.00950523
afb12	afb123	0.973955	0.427746	0.926523	1.32618e-05	0.142929	0.180597	0.0199539	0.0600593	0.00166151	0.00379588	0.034457
afb12	afb125	0.00318248	0.75899	0.0146999	7.37158e-06	0.520784	0.701789	0.0414061	0.000139396	0.245434	0.0835937	0.000318426
afb12	tir1afb12	0.00817032	0.026265	1	2.59395e-11	0.473144	4.98502e-05	5.00443e-12	6.75561e-05	3.67603e-06	1.59016e-12	5.6922e-05
afb123	afb125	0.000647928	0.292154	0.0245412	0.804092	0.0746169	0.135813	0.551559	0.978024	0.000263128	0.0957335	0.542597
afb123	tir1afb12	0.00059401	0.0150838	0.924877	0.00033842	0.349862	0.00693765	3.31196e-08	0.00688225	0.164577	2.64959e-07	0.0122754
afb125	tir1afb12	0.378979	0.0412427	0.013887	0.000846171	0.228481	0.000177295	4.84934e-11	0.00209037	1.62669e-06	2.54419e-12	0.00112988
Col-0 b	tir1-1 b	0.028653	0.204693	0.899851	1.83327e-07	0.476688	NA	0.000873268	7.49051e-05	NA	0.00177932	0.000299782
Col-0 b	tir1-10	0.0501727	0.424688	0.893906	1.92946e-05	0.0134754	NA	4.68072e-06	6.24971e-07	NA	8.77408e-05	0.000138815
Col-0 b	tir1afb1	0.0091772	0.47581	0.237151	0.0070197	0.0227354	NA	1.47854e-05	6.15795e-07	NA	0.000305358	9.54463e-06
Col-0 b	tir1afb2	0.00725075	0.111403	0.0608788	7.87722e-11	0.99495	NA	4.4192e-12	8.51291e-09	NA	4.36776e-12	8.48313e-09
Col-0 b	tir1afb2-1	0.00787178	0.0918569	0.394516	1.49984e-10	0.224104	NA	9.56122e-16	6.65158e-10	NA	1.12751e-14	1.17714e-09
Col-0 b	tir1afb3	0.00011217	0.58957	0.626473	1.84434e-08	0.500682	NA	2.04739e-07	1.24617e-06	NA	6.45315e-07	2.21821e-06
Col-0 b	tir1afb3-1	6.73002e-05	0.242431	0.0685699	0.000192179	0.469421	NA	2.98794e-09	0.000323922	NA	9.90567e-10	0.000228806
Col-0 b	tir1afb4	0.495123	0.97561	0.0268749	1.05517e-07	0.863423	NA	1.23698e-06	0.00129203	NA	9.04959e-07	0.00106531
Col-0 b	tir1afb5	0.0016278	0.818886	0.00841405	4.88854e-08	0.044961	NA	1.05688e-06	4.78834e-06	NA	2.94228e-07	1.13897e-06
Col-0 b	tir1afb12*	6.24981e-05	0.0373665	0.0242811	8.42672e-07	0.113673	NA	5.72774e-08	3.6268e-08	NA	6.84722e-08	4.34943e-08
Col-0 b	tir1afb13	5.76946e-05	0.243538	0.207749	2.09932e-07	0.0313654	NA	1.20651e-05	6.67615e-06	NA	2.7846e-05	1.37891e-05
Col-0 b	tir1afb14	0.0131251	0.809014	0.142037	4.56055e-05	0.0420623	NA	2.57334e-07	0.000152869	NA	2.10127e-06	0.000705638
Col-0 b	tir1afb15	0.000412823	0.456177	0.0709325	1.86952e-07	0.766489	NA	2.03441e-08	6.11459e-08	NA	2.84232e-08	6.96093e-08
Col-0 b	tir1afb23	1.18738e-07	0.026046	0.625931	2.71465e-11	0.00426776	NA	1.0916e-13	8.68826e-11	NA	1.12114e-13	1.18152e-10
Col-0 b	tir1afb2-1 3-1	9.71499e-06	0.0121539	0.0642027	1.94698e-10	0.000793568	NA	7.08775e-12	4.40262e-08	NA	1.1119e-11	3.29968e-08
Col-0 b	tir1afb24	0.000228444	0.117191	0.195808	6.60329e-11	0.468181	NA	1.44196e-12	0.000171688	NA	3.22079e-12	0.000199895
Col-0 b	tir1afb25	1.68011e-06	0.0241894	0.856371	3.98256e-12	0.00116218	NA	7.55736e-10	6.64242e-09	NA	3.05101e-05	5.08283e-09
Col-0 b	tir1afb34	0.000986315	0.287733	0.477446	3.20455e-09	0.0402203	NA	9.36992e-09	0.000240145	NA	6.7545e-08	0.000728766
Col-0 b	tir1afb35	5.38067e-06	0.316998	0.000228082	1.85569e-10	0.959871	NA	7.22821e-12	3.28141e-05	NA	7.55167e-12	3.30739e-05
Col-0 b	tir1afb45	0.000586393	0.721755	7.64703e-06	3.78967e-10	0.0978158	NA	3.74681e-07	0.00134199	NA	1.42273e-07	0.00075236
Col-0 b	tir1afb123	1.89833e-05	0.023134	0.916605	3.98256e-12	0.00523983	NA	2.79604e-08	6.3251e-06	NA	2.49778e-08	4.70171e-06
Col-0 b	tir1afb124	0.00785704	0.09575	0.630832	2.15553e-09	0.936036	NA	1.10627e-11	5.1769e-08	NA	1.12292e-11	5.22876e-08
Col-0 b	tir1afb125	5.18525e-05	0.111532	0.00214429	2.61703e-10	0.00541763	NA	2.42063e-07	1.81825e-12	NA	1.65629e-07	2.61587e-12
Col-0 b	tir1afb134	5.19244e-05	0.758688	0.0943489	7.63056e-08	0.405331	NA	3.205e-06	4.89422e-08	NA	7.04743e-06	7.07786e-08
Col-0 b	tir1afb135	0.000644162	0.666054	0.46648	8.45591e-11	0.0428285	NA	4.54317e-11	6.70872e-06	NA	1.20107e-11	4.65753e-06
Col-0 b	tir1afb145	0.000801783	0.918344	0.00545643	5.70259e-10	0.527458	NA	3.84954e-07	8.63687e-06	NA	1.90376e-07	7.27209e-06
Col-0 b	tir1afb245	6.41439e-07	0.0211804	0.00863108	5.28003e-10	1.10997e-07	NA	5.55822e-11	5.85637e-05	NA	2.44773e-15	3.52669e-05
Col-0 b	tir1afb345	4.34972e-08	0.0535302	4.70765e-05	2.51422e-11	0.0337597	NA	1.0057e-09	4.28703e-13	NA	1.79901e-10	2.41489e-13
Col-0 b	tir1afb1245	1.70338e-07	0.0151524	0.014333	2.6403e-10	0.00965622	NA	3.69656e-12	8.81458e-07	NA	9.0711e-15	7.24199e-07
Col-0 b	tir1afb1345	2.4862e-06	0.0458955	0.000724184	2.97361e-11	0.0632846	NA	1.34062e-10	1.31898e-12	NA	2.14214e-11	1.36903e-12
tir1-1 b	tir1-10	0.909672	0.374004	0.943606	0.0259108	0.0111298	NA	0.0788561	0.174697	NA	0.344142	0.979712
tir1-1 b	tir1afb1	0.605703	0.319227	0.227304	0.011873	0.0386617	NA	0.217619	0.00203031	NA	0.784421	0.0402045
tir1-1 b	tir1afb2	0.345308	0.426756	0.0177483	0.000198336	0.329263	NA	1.90899e-09	1.09584e-06	NA	3.19876e-10	5.64358e-07
tir1-1 b	tir1afb2-1	0.0983625	0.278865	0.254514	6.52138e-06	0.497682	NA	1.44801e-12	3.6494e-08	NA	5.15145e-12	5.42879e-08
tir1-1 b	tir1afb3	0.00297119	0.158287	0.502546	0.11385	0.984579	NA	0.0230187	0.000807937	NA	0.0225	0.000793516
tir1-1 b	tir1afb3-1	0.00271329	0.851493	0.0647211	0.128144	0.0971136	NA	5.96972e-05	0.0141608	NA	2.9354e-06	0.00500431
tir1-1 b	tir1afb4	0.497399	0.0282041	0.0153778	0.196367	0.388017	NA	0.0600157	0.527486	NA	0.0151683	0.26196
tir1-1 b	tir1afb5	0.0135949	0.0480077	0.0104674	0.117319	0.000742491	NA	0.00325046	0.0044216	NA	0.000102481	0.000112237
tir1-1 b	tir1afb12*	0.00068019	0.0402021	0.00202506	0.188025	0.236863	NA	1.00094e-06	1.1161e-07	NA	1.60008e-06	1.36094e-07
tir1-1 b	tir1afb13	0.0020534	0.726564	0.163253	0.804224	0.0541705	NA	0.00130147	9.16125e-05	NA	0.00441366	0.000231418
tir1-1 b	tir1afb14	0.269446	0.0999242	0.0982518	0.0509293	0.0509113	NA	0.00448595	0.0683811	NA	0.0226439	0.21845
tir1-1 b	tir1afb15	0.00304976	0.367282	0.0594294	0.691051	0.578774	NA	0.000373463	6.46002e-06	NA	0.000186032	4.19751e-06
tir1-1 b	tir1afb23	1.47096e-06	0.0183321	0.655429	9.2109e-12	6.43743e-05	NA	7.38278e-13	7.5484e-11	NA	1.44327e-13	1.19007e-10
tir1-1 b	tir1afb2-1 3-1	4.2533e-05	0.00292947	0.0134515	2.62659e-12	2.55147e-07	NA	6.73574e-11	9.26503e-08	NA	1.99937e-11	5.44949e-08
tir1-1 b	tir1afb24	0.00781093	0.51668	0.066688	1.64821e-06	0.953839	NA	4.33286e-10	0.000905055	NA	4.71127e-10	0.000918399
tir1-1 b	tir1afb25	1.36224e-05	0.0428722	0.918524	1.89479e-11	5.74618e-05	NA	3.63779e-08	1.38278e-08	NA	0.000193991	8.21453e-09
tir1-1 b	tir1afb34	0.00638206	0.52559	0.49135	0.00453728	0.0767626	NA	2.28502e-05	0.00912448	NA	0.000277527	0.0302449
tir1-1 b	tir1afb35	3.66485e-05	0.434664	0.000366427	6.97877e-06	0.38412	NA	3.34705e-09	0.000125229	NA	1.1507e-09	0.00010655
tir1-1 b	tir1afb45	0.0039326	0.0859874	4.56118e-08	7.53604e-05	0.00754225	NA	0.000562762	0.0172423	NA	2.94847e-05	0.00526619
tir1-1 b	tir1afb123	3.53491e-05	0.0132842	0.887435	1.89479e-11	0.000639595	NA	4.98801e-07	1.17955e-05	NA	1.14799e-07	7.09072e-06
tir1-1 b	tir1afb124	0.149913	0.339543	0.509953	0.000535646	0.429756	NA	3.30031e-10	1.99234e-07	NA	2.10628e-10	1.7243e-07
tir1-1 b	tir1afb125	0.000307727	0.43351	0.00162948	1.6809e-05	4.4554e-05	NA	9.26286e-06	1.5851e-12	NA	1.48503e-06	2.66757e-12
tir1-1 b	tir1afb134	0.00325259	0.0883903	0.098272	0.322508	0.818562	NA	0.0200434	3.24274e-06	NA	0.0250632	3.93234e-06
tir1-1 b	tir1afb135	0.00137085	0.200139	0.477771	1.57526e-07	0.000849594	NA	2.18797e-08	3.12514e-05	NA	4.23815e-10	1.43559e-05
tir1-1 b	tir1afb145	0.00419664	0.0294541	0.00684691	0.000231943	0.174961	NA	0.00377838	6.20483e-05	NA	0.000460273	3.59414e-05
tir1-1 b	tir1afb245	3.31568e-06	0.0243041	0.012409	4.78213e-12	4.59418e-11	NA	7.55568e-08	0.000100702	NA	1.72755e-15	4.47215e-05
tir1-1 b	tir1afb345	3.71603e-07	0.117838	0.000127721	1.90702e-09	0.000229548	NA	3.511e-06	8.37253e-12	NA	3.71608e-08	6.70343e-13
tir1-1 b	tir1afb1245	9.37978e-07	0.0392782	0.016765	3.10967e-12	0.0050387	NA	1.43694e-09	1.31454e-06	NA	1.20007e-14	9.13831e-07
tir1-1 b	tir1afb1345	1.53115e-05	0.0890936	0.00105893	4.35508e-10	0.0041446	NA	2.8884e-07	5.44829e-12	NA	2.66389e-09	2.43735e-12
tir1-10	tir1afb1	0.748048	0.888071	0.463753	0.260932	0.896092	NA	0.454576	0.0260303	NA	0.421983	0.0305715
tir1-10	tir1afb2	0.472417	0.0864609	0.202858	2.36924e-08	0.000383649	NA	9.95396e-07	5.89212e-06	NA	9.35308e-10	5.47788e-07
tir1-10	tir1afb2-1	0.136249	0.0556015	0.507887	1.0761e-10	0.0578038	NA	7.32334e-10	1.59461e-07	NA	2.09288e-11	5.55571e-08
tir1-10	tir1afb3	0.00877792	0.603893	0.651878	4.4464e-05	0.0163476	NA	0.915098	0.00543595	NA	0.210537	0.000672432
tir1-10	tir1afb3-1	0.009753	0.487709	0.203363	0.844918	0.00052758	NA	0.0218165	0.0470459	NA	3.72214e-05	0.0048007
tir1-10	tir1afb4	0.47366	0.139582	0.173594	0.00214059	0.0138274	NA	0.677164	0.728986	NA	0.164837	0.241409
tir1-10	tir1afb5	0.0195786	0.239568	0.0227476	3.86009e-05	3.95378e-07	NA	0.162293	0.0377015	NA	0.000675327	0.000107519
tir1-10	tir1afb12*	0.0017039	0.00851477	0.134651	0.0056282	0.317197	NA	8.97822e-06	1.97932e-07	NA	5.43112e-06	1.66485e-07
tir1-10	tir1afb13	0.00894222	0.45467	0.50584	0.00888118	0.875508	NA	0.0205939	0.00025133	NA	0.0187335	0.000234422
tir1-10	tir1afb14	0.357924	0.366538	0.426266	0.936509	0.279091	NA	0.291071	0.326069	NA	0.170014	0.198423
tir1-10	tir1afb15	0.00475935	0.945798	0.246197	0.00805488	0.00273135	NA	0.0645194	4.78459e-05	NA	0.0023528	4.63269e-06
tir1-10	tir1afb23	1.61923e-05	0.0041329	0.810747	4.55463e-16	2.5133e-07	NA	1.19317e-11	1.26222e-10	NA	3.22571e-13	1.81039e-10
tir1-10	tir1afb2-1 3-1	9.03704e-05	0.000936277	0.218798	3.89521e-16	8.1831e-11	NA	1.04979e-09	1.30796e-07	NA	4.65754e-11	5.81215e-08
tir1-10	tir1afb24	0.0207457	0.1399	0.379061	5.31382e-10	0.0269358	NA	8.94739e-08	0.00161098	NA	2.38059e-09	0.000915746
tir1-10	tir1afb25	6.62385e-05	0.0117402	1	3.74014e-15	1.59348e-06	NA	1.21122e-06	2.11095e-08	NA	0.000359426	9.21922e-09
tir1-10	tir1afb34	0.00869634	0.602743	0.679165	1.13609e-06	0.926432	NA	0.00340553	0.0299152	NA	0.00302551	0.0282766
tir1-10	tir1afb35	0.00012174	0.709958	0.00362254	1.077e-09	0.00127342	NA	6.9153e-07	0.000202177	NA	6.46378e-09	0.000107919
tir1-10	tir1afb45	0.00567222	0.384716	0.000663904	1.74707e-08	3.21929e-05	NA	0.0339861	0.0390393	NA	0.00017126	0.00517299
tir1-10	tir1afb123	4.07814e-05	0.00466823	0.870077	3.74014e-15	2.47373e-05	NA	4.78682e-06	1.47977e-05	NA	2.34452e-07	7.16345e-06
tir1-10	tir1afb124	0.213151	0.0692096	0.653488	6.03801e-06	0.00235382	NA	8.36421e-09	3.91549e-07	NA	7.92025e-10	2.10537e-07
tir1-10	tir1afb125	0.000579568	0.0885643	0.0324307	3.33029e-07	8.48078e-08	NA	0.000132542	3.21013e-12	NA	3.58313e-06	4.77644e-12
tir1-10	tir1afb134	0.0135011	0.370584	0.171047	0.0021499	0.0593936	NA	0.53461	2.0955e-05	NA	0.154719	4.38152e-06
tir1-10	tir1afb135	0.00111144	0.582563	0.504815	1.40141e-11	7.13902e-07	NA	4.16564e-06	5.59741e-05	NA	1.81747e-09	1.49083e-05
tir1-10	tir1afb145	0.00528656	0.133785	0.00490875	6.72267e-08	0.00462432	NA	0.228112	0.000131355	NA	0.00427545	3.75463e-05
tir1-10	tir1afb245	1.86828e-05	0.00662454	0.0183771	2.68238e-15	2.9037e-12	NA	4.42239e-05	0.000123992	NA	2.90659e-15	4.50701e-05
tir1-10	tir1afb345	4.19736e-06	0.0240256	2.28875e-05	1.80434e-13	2.52282e-08	NA	0.000924892	1.03448e-10	NA	2.45519e-07	2.29091e-12
tir1-10	tir1afb1245	6.04017e-06	0.0156341	0.0167371	6.21988e-16	0.00119787	NA	4.71904e-07	1.71149e-06	NA	2.25786e-14	9.73238e-07
tir1-10	tir1afb1345	6.84263e-05	0.0185255	0.00032691	2.77248e-14	2.25949e-05	NA	9.13144e-05	3.79245e-11	NA	1.51544e-08	8.76718e-12
tir1afb1	tir1afb2	0.60931	0.077155	0.0174009	1.13834e-05	0.00576081	NA	4.01816e-08	0.000290938	NA	7.95768e-11	1.26529e-05
tir1afb1	tir1afb2-1	0.162775	0.0513348	0.0760582	5.87395e-06	0.114948	NA	2.74347e-11	4.65942e-06	NA	1.04863e-12	9.94926e-07
tir1afb1	tir1afb3	0.00484777	0.723617	0.136458	0.000798822	0.0438577	NA	0.263296	0.184243	NA	0.0156166	0.0275184
tir1afb1	tir1afb3-1	0.00419444	0.419254	0.451359	0.265506	0.00211536	NA	0.000949081	0.418473	NA	1.4233e-06	0.0407072
tir1afb1	tir1afb4	0.343506	0.196966	0.375763	0.0014999	0.0205269	NA	0.574028	0.0420615	NA	0.00919938	0.608057
tir1afb1	tir1afb5	0.0221441	0.325073	0.0378153	0.000903463	3.31541e-05	NA	0.0293445	0.914707	NA	0.000131162	0.00493894
tir1afb1	tir1afb12*	0.00105442	0.00862742	0.0122166	0.00214228	0.349562	NA	5.52521e-06	3.67105e-07	NA	3.63948e-06	2.80368e-07
tir1afb1	tir1afb13	0.00219045	0.381607	0.854193	0.00689335	0.808526	NA	0.00619294	0.00236563	NA	0.0052497	0.00197914
tir1afb1	tir1afb14	0.448895	0.449977	1	0.259301	0.373969	NA	0.049566	0.394783	NA	0.0202352	0.641264
tir1afb1	tir1afb15	0.00494341	0.947026	0.563115	0.00581788	0.0142948	NA	0.00518382	0.00660543	NA	0.000117501	0.000212521
tir1afb1	tir1afb23	1.03468e-06	0.00431809	0.559013	1.1088e-07	3.47828e-06	NA	3.46923e-11	3.52096e-11	NA	5.68522e-12	8.35832e-11
tir1afb1	tir1afb2-1 3-1	6.26248e-05	0.00109799	0.0196151	1.31634e-07	5.34232e-07	NA	1.88836e-09	1.84618e-07	NA	3.74833e-10	7.15143e-08
tir1afb1	tir1afb24	0.0136732	0.119804	0.0428912	1.75366e-06	0.0551629	NA	9.92674e-09	0.00552931	NA	6.62071e-10	0.00260927
tir1afb1	tir1afb25	1.5622e-05	0.0104839	0.352085	4.92664e-08	2.84198e-06	NA	5.02763e-07	2.56946e-08	NA	0.00024687	1.01858e-08
tir1afb1	tir1afb34	0.010156	0.504949	0.717009	9.73786e-05	0.854579	NA	0.000279277	0.29037	NA	0.000215361	0.258682
tir1afb1	tir1afb35	4.88726e-05	0.596899	0.00196256	4.48652e-06	0.0080811	NA	6.58558e-08	0.000540141	NA	2.20033e-09	0.000235115
tir1afb1	tir1afb45	0.00631697	0.487659	0.000131319	1.09624e-05	0.000175278	NA	0.00505075	0.196391	NA	4.20125e-05	0.0194284
tir1afb1	tir1afb123	5.59944e-05	0.00496952	0.566987	4.92664e-08	2.86666e-05	NA	3.05575e-06	2.2163e-05	NA	2.9573e-07	9.176e-06
tir1afb1	tir1afb124	0.257679	0.0615142	0.139436	9.05704e-06	0.0104441	NA	6.14881e-09	9.37455e-07	NA	1.36693e-09	3.72917e-07
tir1afb1	tir1afb125	0.000477492	0.078616	0.0368679	6.12265e-07	3.66534e-06	NA	5.18464e-05	8.48681e-13	NA	3.12307e-06	1.78018e-12
tir1afb1	tir1afb134	0.00459541	0.465015	0.353559	0.00224102	0.0914338	NA	0.155018	0.00214605	NA	0.0254192	0.000183805
tir1afb1	tir1afb135	0.00203644	0.677847	0.68492	1.37976e-06	3.36383e-05	NA	3.93574e-07	0.000177902	NA	2.12928e-09	3.04732e-05
tir1afb1	tir1afb145	0.0065406	0.180401	0.00955997	1.76405e-05	0.00742487	NA	0.0389722	0.000636208	NA	0.00041557	0.000111013
tir1afb1	tir1afb245	3.21797e-06	0.0061223	0.02966	1.64454e-07	2.29578e-10	NA	1.3852e-06	0.000174624	NA	1.4166e-13	5.17534e-05
tir1afb1	tir1afb345	2.67134e-07	0.0220196	3.96838e-05	3.12118e-07	2.06513e-05	NA	5.07467e-05	9.96161e-07	NA	7.36748e-08	1.07416e-10
tir1afb1	tir1afb1245	9.27928e-07	0.0137948	0.0316031	1.4312e-07	0.000988651	NA	3.22445e-08	1.70358e-06	NA	5.89009e-13	9.99297e-07
tir1afb1	tir1afb1345	9.78633e-06	0.0170724	0.000791808	2.56523e-07	0.000107852	NA	4.61056e-06	6.11058e-09	NA	6.65214e-09	2.03953e-11
tir1afb2	tir1afb2-1	0.297602	0.57107	0.236009	0.519457	0.094216	NA	0.000731073	0.159852	NA	0.0383312	0.429875
tir1afb2	tir1afb3	0.0156596	0.0189372	0.187378	0.0035401	0.369754	NA	7.6433e-12	0.0159352	NA	3.99754e-13	0.00684902
tir1afb2	tir1afb3-1	0.0162276	0.328359	0.00643846	7.47616e-05	0.363781	NA	7.06725e-05	0.0155537	NA	0.000952301	0.0355878
tir1afb2	tir1afb4	0.23838	0.000426684	0.000718392	0.0309435	0.843034	NA	8.02287e-13	7.64315e-06	NA	1.6518e-12	9.79935e-06
tir1afb2	tir1afb5	0.041815	0.0007539	0.00236818	0.00189731	0.00692142	NA	0.000877696	0.000489435	NA	0.0494445	0.00895518
tir1afb2	tir1afb12*	0.00256696	0.0278488	0.496068	0.107433	0.0456545	NA	0.00976173	3.05446e-05	NA	0.0742795	0.000241315
tir1afb2	tir1afb13	0.0103812	0.0983107	0.00455799	0.000233834	0.00734232	NA	0.36216	0.951009	NA	0.029289	0.242412
tir1afb2	tir1afb14	0.743979	0.0226144	0.00266181	1.67719e-06	0.00188137	NA	2.53204e-05	0.000101189	NA	2.34936e-07	9.76186e-06
tir1afb2	tir1afb15	0.00934029	0.102508	0.00383122	0.000625658	0.67902	NA	0.000128406	0.0682268	NA	5.67117e-05	0.0485589
tir1afb2	tir1afb23	5.1233e-06	0.0104195	0.0718866	2.3766e-06	0.000460795	NA	9.13702e-07	2.15342e-13	NA	1.85957e-08	2.16832e-13
tir1afb2	tir1afb2-1 3-1	0.000104782	0.000176372	0.879163	8.26527e-08	2.61815e-06	NA	3.87731e-05	7.53004e-07	NA	4.55937e-07	1.853e-07
tir1afb2	tir1afb24	0.0434431	1	0.301789	0.125262	0.341136	NA	0.0460411	0.309327	NA	0.251124	0.441112
tir1afb2	tir1afb25	4.37903e-05	0.0768051	0.0836189	4.52173e-06	0.000270244	NA	0.0314509	9.09082e-08	NA	0.0377991	1.33852e-08
tir1afb2	tir1afb34	0.0177981	0.0263596	0.0536383	0.157529	0.0147503	NA	0.0497207	0.0279787	NA	0.000248854	0.0020039
tir1afb2	tir1afb35	0.000111137	0.0158168	6.15004e-05	0.371914	0.93864	NA	0.19903	0.0263292	NA	0.221118	0.0272911
tir1afb2	tir1afb45	0.011362	0.00688119	1.66751e-07	0.860716	0.0409454	NA	0.01587	0.179791	NA	0.309941	0.537635
tir1afb2	tir1afb123	5.71072e-05	0.00116397	0.603036	4.52173e-06	0.00235394	NA	0.00703405	9.53412e-05	NA	8.62471e-05	3.26158e-05
tir1afb2	tir1afb124	0.474795	0.734868	0.193998	0.441783	0.908712	NA	0.000279618	0.000443875	NA	0.000326533	0.000498566
tir1afb2	tir1afb125	0.000873846	1	0.000156313	0.0312835	0.000376361	NA	0.175794	7.23499e-14	NA	0.00426239	7.84517e-15
tir1afb2	tir1afb134	0.0213382	0.0116633	0.0203354	0.00510372	0.292075	NA	5.39365e-05	0.149202	NA	8.38099e-06	0.0565592
tir1afb2	tir1afb135	0.00218585	0.0701109	0.270403	0.046485	0.00733811	NA	0.555479	0.0269239	NA	0.00665451	0.00433977
tir1afb2	tir1afb145	0.010557	0.00428337	0.00306863	0.862269	0.461658	NA	0.000120228	0.242576	NA	0.000730232	0.13425
tir1afb2	tir1afb245	8.61267e-06	0.0426627	0.00354539	5.53283e-08	3.01727e-10	NA	0.0766144	0.00064877	NA	1.47511e-09	9.96695e-05
tir1afb2	tir1afb345	1.15282e-06	0.20306	5.43261e-05	0.000958392	0.00273046	NA	0.0642782	0.752856	NA	0.637306	0.213286
tir1afb2	tir1afb1245	2.54195e-06	0.0703866	0.00654492	7.5789e-08	0.00914196	NA	0.356687	1.37437e-06	NA	1.35076e-08	7.01759e-07
tir1afb2	tir1afb1345	3.25186e-05	0.146734	0.000590126	0.000240368	0.0229554	NA	0.315158	0.115569	NA	0.15025	0.0022935
tir1afb2-1	tir1afb3	0.264001	0.0120791	0.762148	5.67293e-05	0.510197	NA	3.49413e-13	0.000314915	NA	1.23208e-12	0.000647219
tir1afb2-1	tir1afb3-1	0.304526	0.214763	0.0225332	2.45474e-05	0.0284291	NA	3.49059e-08	0.000487586	NA	1.86699e-05	0.00594989
tir1afb2-1	tir1afb4	0.0866335	0.000236892	0.00555903	0.00648875	0.184168	NA	2.08092e-13	1.57536e-07	NA	3.69264e-12	7.56675e-07
tir1afb2-1	tir1afb5	0.286933	0.00036159	0.00433319	2.18773e-05	0.000102348	NA	2.6745e-06	7.5409e-06	NA	0.00355614	0.000822692
tir1afb2-1	tir1afb12*	0.0508613	0.0475828	0.0819582	0.0393024	0.541211	NA	0.291091	0.000801006	NA	0.466327	0.00155924
tir1afb2-1	tir1afb13	0.232549	0.0382099	0.044447	1.0255e-05	0.162959	NA	0.0171488	0.166661	NA	0.00348344	0.0564838
tir1afb2-1	tir1afb14	0.481997	0.0166861	0.0281887	2.78882e-07	0.230959	NA	2.41709e-08	1.72762e-06	NA	3.89417e-09	7.62802e-07
tir1afb2-1	tir1afb15	0.0949007	0.069462	0.0188052	4.30864e-05	0.216837	NA	9.3435e-08	0.00153235	NA	1.21372e-06	0.00545181
tir1afb2-1	tir1afb23	0.000355462	0.0173794	0.265249	5.57136e-07	1.31329e-05	NA	0.000369664	1.25918e-12	NA	1.91964e-08	3.26819e-13
tir1afb2-1	tir1afb2-1 3-1	0.00191349	0.00023744	0.256221	2.67446e-09	2.7641e-08	NA	0.0124032	3.59948e-06	NA	6.76998e-07	3.10367e-07
tir1afb2-1	tir1afb24	0.504833	0.748749	0.691339	0.27666	0.570266	NA	0.20487	0.92893	NA	0.43376	0.801512
tir1afb2-1	tir1afb25	0.00176569	0.107512	0.366955	3.23754e-06	1.9083e-05	NA	0.738498	7.67458e-07	NA	0.108696	2.40061e-08
tir1afb2-1	tir1afb34	0.132888	0.00626505	0.193212	0.0217794	0.196184	NA	0.000129226	0.00100189	NA	6.49199e-06	0.000219813
tir1afb2-1	tir1afb35	0.00322739	0.00341116	0.00010661	0.753263	0.124266	NA	0.0776772	0.14319	NA	0.554417	0.069646
tir1afb2-1	tir1afb45	0.0999537	0.00452999	2.58786e-06	0.612411	0.00179198	NA	7.80213e-05	0.0192861	NA	0.0368054	0.236417
tir1afb2-1	tir1afb123	0.000421446	0.000545501	0.86118	3.23754e-06	0.00024648	NA	0.256466	0.000236867	NA	0.000289059	4.5545e-05
tir1afb2-1	tir1afb124	0.707527	0.928107	0.765289	0.729134	0.153778	NA	0.0880915	0.0142669	NA	0.010013	0.00323308
tir1afb2-1	tir1afb125	0.0134964	0.596004	0.000611436	0.0622102	7.50444e-06	NA	0.603738	2.32588e-12	NA	0.0248164	1.95827e-14
tir1afb2-1	tir1afb134	0.400525	0.00819257	0.0456415	0.000542478	0.726972	NA	1.04839e-07	0.00437015	NA	2.08244e-07	0.00656909
tir1afb2-1	tir1afb135	0.00675004	0.0546309	0.368029	0.105013	0.000128997	NA	0.022712	0.209352	NA	0.232853	0.013567
tir1afb2-1	tir1afb145	0.0733436	0.00343626	0.00403999	0.371649	0.0733756	NA	1.70111e-07	0.981504	NA	2.46168e-05	0.373088
tir1afb2-1	tir1afb245	0.000328644	0.0618118	0.00516944	2.21238e-09	1.62994e-11	NA	2.23461e-05	0.00163863	NA	1.21404e-09	0.000119759
tir1afb2-1	tir1afb345	9.06807e-05	0.318578	4.43675e-05	0.00136088	2.2866e-05	NA	9.34538e-05	0.0437451	NA	0.278369	0.819942
tir1afb2-1	tir1afb1245	0.000136675	0.0893015	0.00968379	2.33824e-09	0.00333244	NA	0.0140403	4.08759e-06	NA	3.77565e-08	8.71037e-07
tir1afb2-1	tir1afb1345	0.000411508	0.228767	0.000630623	0.000237333	0.00100335	NA	0.000624352	0.802897	NA	0.79689	0.0297035
tir1afb3	tir1afb3-1	0.849594	0.227487	0.0402798	0.00828521	0.114154	NA	0.00319113	0.776302	NA	9.67798e-05	0.732621
tir1afb3	tir1afb4	0.0206022	0.257557	0.0168943	0.937903	0.409371	NA	0.403749	0.00682076	NA	0.905329	0.0185937
tir1afb3	tir1afb5	0.893021	0.459844	0.00542588	0.903422	0.00131663	NA	0.114904	0.233892	NA	0.00336735	0.740448
tir1afb3	tir1afb12*	0.171012	0.00154985	0.0831243	0.751371	0.250099	NA	1.80722e-05	4.21242e-07	NA	3.256e-05	7.88086e-07
tir1afb3	tir1afb13	0.983441	0.151058	0.111299	0.1446	0.0616693	NA	0.0172554	0.0322365	NA	0.0651714	0.134551
tir1afb3	tir1afb14	0.0577575	0.619895	0.0773818	0.000775919	0.0684557	NA	0.214841	0.0650275	NA	0.729279	0.0188039
tir1afb3	tir1afb15	0.343764	0.68086	0.0405617	0.228583	0.614282	NA	0.0239841	0.315772	NA	0.011808	0.22064
tir1afb3	tir1afb23	4.01357e-05	0.000754609	0.398693	4.34352e-13	9.6185e-05	NA	1.70722e-10	1.4191e-13	NA	7.66305e-11	8.11688e-13
tir1afb3	tir1afb2-1 3-1	0.00219476	0.000151636	0.204105	7.98037e-15	7.94197e-07	NA	1.20674e-08	1.32817e-07	NA	3.64367e-09	6.44676e-08
tir1afb3	tir1afb24	0.511694	0.0483871	0.502546	1.99762e-05	0.941716	NA	7.43752e-09	0.0202839	NA	8.10642e-09	0.0209597
tir1afb3	tir1afb25	0.000958233	0.00511482	0.551305	2.49894e-11	6.48058e-05	NA	2.3507e-06	1.01738e-08	NA	0.000758004	5.26749e-09
tir1afb3	tir1afb34	0.457719	0.211365	0.297568	0.080193	0.0833972	NA	0.00111599	0.967441	NA	0.015669	0.456972
tir1afb3	tir1afb35	0.00317583	0.26893	0.00017218	8.35911e-05	0.422279	NA	1.02382e-07	0.00149928	NA	4.41125e-08	0.00111256
tir1afb3	tir1afb45	0.355442	0.695778	1.786e-05	0.00120238	0.00991417	NA	0.0197852	0.637373	NA	0.000869788	0.195251
tir1afb3	tir1afb123	0.000470315	0.00130985	0.944701	2.49894e-11	0.000708217	NA	1.06889e-05	2.86016e-05	NA	1.22095e-06	1.31412e-05
tir1afb3	tir1afb124	0.112501	0.0157772	1	0.00553625	0.464867	NA	3.13714e-08	2.06218e-06	NA	2.16066e-08	1.29564e-06
tir1afb3	tir1afb125	0.0326426	0.0195229	0.00164303	0.000193171	7.60188e-05	NA	0.000164137	3.9114e-15	NA	1.60157e-05	7.37683e-15
tir1afb3	tir1afb134	0.578067	0.654844	0.0620989	0.655476	0.812968	NA	0.507839	0.157985	NA	0.600762	0.195546
tir1afb3	tir1afb135	0.0192427	0.894803	0.404076	7.88437e-07	0.00142662	NA	8.77221e-07	0.000635248	NA	3.95385e-08	0.000123647
tir1afb3	tir1afb145	0.249027	0.243155	0.00406894	0.00395786	0.190436	NA	0.163149	0.00422338	NA	0.0217974	0.00131357
tir1afb3	tir1afb245	6.12122e-05	0.0027677	0.00561851	5.51117e-14	4.21375e-11	NA	1.65204e-07	0.000204725	NA	2.12803e-12	6.15453e-05
tir1afb3	tir1afb345	5.91013e-06	0.00599252	2.83287e-05	3.4123e-09	0.000513411	NA	0.00016423	0.003346	NA	2.03046e-06	4.33251e-06
tir1afb3	tir1afb1245	1.91956e-05	0.00998305	0.0105536	1.06407e-14	0.00508113	NA	4.64199e-09	5.76421e-07	NA	8.49594e-12	6.02322e-07
tir1afb3	tir1afb1345	8.03487e-05	0.00483137	0.00054244	2.75961e-10	0.00546763	NA	1.0245e-05	8.67684e-06	NA	1.55292e-07	8.55158e-09
tir1afb3-1	tir1afb4	0.0237632	0.0449539	1	0.0165634	0.614686	NA	0.000371844	0.0416338	NA	0.000104484	0.0267561
tir1afb3-1	tir1afb5	0.781567	0.0756074	0.109831	0.00882781	0.144624	NA	0.509289	0.474215	NA	0.735657	0.926924
tir1afb3-1	tir1afb12*	0.11692	0.0332358	0.00576688	0.0201297	0.0145718	NA	0.000191929	4.40737e-07	NA	0.00220852	3.73631e-06
tir1afb3-1	tir1afb13	0.81587	0.909799	0.305926	0.0785958	0.00274812	NA	0.255463	0.0275377	NA	0.657634	0.304548
tir1afb3-1	tir1afb14	0.066127	0.140241	0.382896	0.901961	0.00224322	NA	0.178359	0.190932	NA	0.0015267	0.027709
tir1afb3-1	tir1afb15	0.267339	0.471932	0.80777	0.066147	0.22225	NA	0.662504	0.241485	NA	0.172017	0.519852
tir1afb3-1	tir1afb23	1.49673e-05	0.0156988	0.216141	1.62174e-07	0.0124371	NA	3.55295e-09	4.01207e-13	NA	3.94223e-10	2.47131e-13
tir1afb3-1	tir1afb2-1 3-1	0.00155987	0.00288801	0.0075867	1.84684e-07	0.00150215	NA	1.84757e-07	7.793e-08	NA	1.63145e-08	4.39676e-08
tir1afb3-1	tir1afb24	0.606748	0.414852	0.0147314	6.53982e-06	0.107222	NA	9.48017e-06	0.0162893	NA	0.000402737	0.038138
tir1afb3-1	tir1afb25	0.00052425	0.034556	0.115422	7.18996e-08	0.00318638	NA	8.98415e-05	6.60003e-09	NA	0.00646518	2.84863e-09
tir1afb3-1	tir1afb34	0.373857	0.70124	0.30184	0.000751646	0.00497551	NA	0.192414	0.826366	NA	0.240199	0.334898
tir1afb3-1	tir1afb35	0.00193925	0.596087	0.00720919	1.86659e-05	0.342408	NA	7.8447e-05	0.0011861	NA	0.000533761	0.00182959
tir1afb3-1	tir1afb45	0.281036	0.129598	0.000286064	5.80208e-05	0.28075	NA	0.694631	0.514392	NA	0.248457	0.315345
tir1afb3-1	tir1afb123	0.000455253	0.0122997	0.377063	7.18996e-08	0.0147375	NA	0.000119361	2.22522e-05	NA	8.91183e-06	1.29407e-05
tir1afb3-1	tir1afb124	0.129816	0.262344	0.0414122	7.13584e-05	0.341744	NA	8.9716e-07	2.81794e-06	NA	2.85894e-06	6.73662e-06
tir1afb3-1	tir1afb125	0.0225308	0.334254	0.1561	3.65949e-06	0.0156869	NA	0.00296741	1.87294e-13	NA	0.000278958	2.40801e-14
tir1afb3-1	tir1afb134	0.697688	0.130067	0.723792	0.0257526	0.0951565	NA	0.105815	0.129681	NA	0.00749726	0.481232
tir1afb3-1	tir1afb135	0.0172966	0.261968	0.866441	4.05178e-06	0.136919	NA	0.000469552	0.000518015	NA	2.62939e-05	0.000208748
tir1afb3-1	tir1afb145	0.198097	0.0447215	0.0165374	0.000105107	0.995742	NA	0.294882	0.0036434	NA	0.297113	0.00362416
tir1afb3-1	tir1afb245	3.35802e-05	0.0199343	0.0813316	2.39369e-07	6.32052e-08	NA	0.00645568	0.000154634	NA	1.95092e-11	5.86461e-05
tir1afb3-1	tir1afb345	2.36773e-06	0.0921928	5.66408e-05	6.45082e-07	0.109386	NA	0.0842321	0.00814453	NA	0.00576328	0.00102151
tir1afb3-1	tir1afb1245	1.05502e-05	0.0328002	0.0611372	2.03203e-07	0.0184104	NA	4.59778e-05	2.68664e-07	NA	1.6667e-10	3.16657e-07
tir1afb3-1	tir1afb1345	3.33065e-05	0.0701488	0.00105958	4.78326e-07	0.188	NA	0.0109192	0.000151512	NA	0.00052488	1.5827e-05
tir1afb4	tir1afb5	0.0207116	0.567962	0.0873829	0.871511	0.0878361	NA	0.0402141	0.0471738	NA	0.00365113	0.00395308
tir1afb4	tir1afb12*	0.00663177	5.6802e-05	0.000640888	0.825643	0.0953378	NA	1.45613e-05	6.10731e-08	NA	4.15584e-05	9.81063e-08
tir1afb4	tir1afb13	0.0234734	0.00687016	0.189434	0.247641	0.0281053	NA	0.00901732	0.000178982	NA	0.0681269	0.00125795
tir1afb4	tir1afb14	0.188834	0.678085	0.256786	0.00462061	0.0396193	NA	0.0640432	0.276482	NA	0.782397	0.9549
tir1afb4	tir1afb15	0.0087443	0.195457	0.765941	0.323591	0.632088	NA	0.00457736	0.000112042	NA	0.0113939	0.000233642
tir1afb4	tir1afb23	0.000471338	4.40733e-05	0.163541	2.47048e-06	0.010316	NA	7.5977e-10	3.49482e-12	NA	3.40058e-10	9.76235e-12
tir1afb4	tir1afb2-1 3-1	0.000885112	2.80053e-06	0.000756111	1.58e-06	0.00267236	NA	2.99473e-08	6.22649e-08	NA	1.02891e-08	4.43685e-08
tir1afb4	tir1afb24	0.0341072	0.00834103	0.0018718	0.00129151	0.382979	NA	9.94707e-09	0.0013052	NA	2.8562e-08	0.00186952
tir1afb4	tir1afb25	0.00107977	0.00218795	0.0703638	1.48215e-06	0.00273328	NA	2.41214e-06	6.07753e-09	NA	0.000803307	4.8727e-09
tir1afb4	tir1afb34	0.0109582	0.00714075	0.243629	0.233422	0.0348324	NA	0.000342515	0.0265205	NA	0.0156154	0.169432
tir1afb4	tir1afb35	0.00139692	0.00976658	0.00300486	0.00445122	0.804079	NA	9.04534e-08	0.000155257	NA	1.19774e-07	0.000167487
tir1afb4	tir1afb45	0.00891372	0.436708	1.3583e-05	0.0184295	0.160222	NA	0.00692658	0.0332288	NA	0.000972393	0.0137898
tir1afb4	tir1afb123	0.000330348	6.47209e-05	0.368469	1.48215e-06	0.00967734	NA	8.93097e-06	1.20451e-05	NA	1.59324e-06	7.81916e-06
tir1afb4	tir1afb124	0.126666	0.000818268	0.018139	0.0155736	0.786082	NA	4.42778e-08	1.21132e-07	NA	5.22954e-08	1.32846e-07
tir1afb4	tir1afb125	0.00269344	0.000524199	0.0834076	0.000634553	0.0134286	NA	0.000108253	5.68224e-14	NA	1.96275e-05	1.23041e-13
tir1afb4	tir1afb134	0.0304552	0.541952	0.700076	0.678101	0.332713	NA	0.228759	4.09501e-05	NA	0.638585	0.000199199
tir1afb4	tir1afb135	0.0013148	0.477728	0.864833	0.000487867	0.0832878	NA	6.63826e-07	3.68789e-05	NA	1.13264e-07	1.95075e-05
tir1afb4	tir1afb145	0.00692245	0.774036	0.0178081	0.0358915	0.655147	NA	0.051329	8.70998e-05	NA	0.0221478	6.6118e-05
tir1afb4	tir1afb245	0.000427437	0.00148752	0.0675067	1.87873e-06	7.86755e-07	NA	5.02388e-08	9.7261e-05	NA	2.12679e-11	4.66367e-05
tir1afb4	tir1afb345	0.000192919	0.000789834	0.00013024	3.22536e-05	0.070549	NA	4.72531e-05	8.01227e-08	NA	3.43472e-06	1.80792e-09
tir1afb4	tir1afb1245	0.000233367	0.00599301	0.0591211	1.7007e-06	0.0120517	NA	5.87344e-09	6.38605e-07	NA	7.32571e-11	6.58582e-07
tir1afb4	tir1afb1345	0.000499185	0.00078079	0.00157905	1.68991e-05	0.1093	NA	3.85364e-06	7.27158e-10	NA	3.48943e-07	3.5506e-11
tir1afb5	tir1afb12*	0.329207	8.94245e-05	0.00278468	0.697122	0.000191526	NA	9.24379e-05	2.90648e-07	NA	0.0068975	1.9023e-06
tir1afb5	tir1afb13	0.869093	0.0151035	0.0257357	0.149331	3.0128e-05	NA	0.15244	0.00298469	NA	0.532989	0.183565
tir1afb5	tir1afb14	0.0860162	0.955252	0.0311789	0.00084494	3.98583e-06	NA	0.624662	0.375482	NA	0.00796963	0.00388955
tir1afb5	tir1afb15	0.497332	0.313966	0.0706541	0.241222	0.00373504	NA	0.777446	0.0127347	NA	0.186951	0.312595
tir1afb5	tir1afb23	0.00102456	6.84178e-05	0.019427	1.26715e-11	0.13724	NA	8.75394e-09	9.93761e-12	NA	8.99967e-10	1.37648e-11
tir1afb5	tir1afb2-1 3-1	0.00982977	3.52024e-06	0.00290609	1.79922e-11	0.018693	NA	1.71706e-07	1.52689e-07	NA	1.26796e-08	1.10619e-07
tir1afb5	tir1afb24	0.530505	0.0138591	0.00435511	1.55786e-05	0.00204385	NA	5.30447e-05	0.00605081	NA	0.0143367	0.0269225
tir1afb5	tir1afb25	0.00824728	0.00307824	0.0111107	1.77868e-10	0.0308215	NA	7.25652e-05	1.80466e-08	NA	0.00905469	1.24418e-08
tir1afb5	tir1afb34	0.598946	0.016247	0.0270937	0.0508407	0.000121141	NA	0.104711	0.336561	NA	0.23083	0.271882
tir1afb5	tir1afb35	0.0176112	0.0227513	0.273187	5.28666e-05	0.00855765	NA	0.000206357	0.000565542	NA	0.013018	0.00146958
tir1afb5	tir1afb45	0.501269	0.743222	0.00473927	0.000697919	0.809839	NA	0.392107	0.219798	NA	0.470185	0.247553
tir1afb5	tir1afb123	0.00146413	6.97873e-05	0.114055	1.77868e-10	0.101953	NA	5.65846e-05	2.17506e-05	NA	7.85819e-06	1.55349e-05
tir1afb5	tir1afb124	0.148184	0.00149532	0.0054533	0.0044091	0.0104778	NA	8.73662e-07	7.95131e-07	NA	3.87576e-05	2.99142e-06
tir1afb5	tir1afb125	0.0868771	0.000959307	0.53121	0.000176418	0.185558	NA	0.00166151	2.32017e-13	NA	0.000476763	2.64236e-13
tir1afb5	tir1afb134	0.594677	0.843934	0.275486	0.707265	0.00245034	NA	0.415587	0.00429495	NA	0.0166531	0.276229
tir1afb5	tir1afb135	0.02916	0.685389	0.639309	7.68137e-07	0.943639	NA	0.00076577	0.000185148	NA	0.000686041	0.00017991
tir1afb5	tir1afb145	0.365267	0.48642	0.0962482	0.00231034	0.237818	NA	0.779471	0.000712734	NA	0.266558	0.00186451
tir1afb5	tir1afb245	0.000925317	0.00206599	0.869658	6.89071e-10	2.26919e-07	NA	0.0105597	0.000168355	NA	5.11656e-10	6.89163e-05
tir1afb5	tir1afb345	0.000212512	0.00130134	0.000228868	8.45271e-09	0.918725	NA	0.0513451	7.94404e-06	NA	0.0458777	6.69448e-06
tir1afb5	tir1afb1245	0.000381771	0.00762366	0.387358	4.07075e-11	0.0540329	NA	0.000308536	1.24147e-06	NA	6.65789e-09	9.96758e-07
tir1afb5	tir1afb1345	0.000761108	0.00125612	0.00264021	1.18091e-09	0.964861	NA	0.0100807	3.38263e-08	NA	0.0093639	3.11236e-08
tir1afb12*	tir1afb13	0.115882	0.00310358	0.00233683	0.232001	0.467449	NA	0.0078391	5.32857e-05	NA	0.00378441	2.60473e-05
tir1afb12*	tir1afb14	0.00969733	0.00313865	0.00136371	0.00857303	0.771276	NA	4.36041e-05	1.26348e-07	NA	3.74198e-05	1.19051e-07
tir1afb12*	tir1afb15	0.784559	0.0127231	0.00334433	0.289246	0.100182	NA	0.000119894	2.40251e-06	NA	0.000434865	6.0296e-06
tir1afb12*	tir1afb23	0.00046671	0.44702	0.0439614	7.38358e-05	1.81788e-05	NA	0.126267	3.59257e-07	NA	6.72289e-06	9.57022e-11
tir1afb12*	tir1afb2-1 3-1	0.0211571	0.0129101	0.333153	3.34209e-05	1.47926e-06	NA	0.448814	0.0024494	NA	3.18527e-05	7.19088e-06
tir1afb12*	tir1afb24	0.0646282	0.118645	0.0545921	0.0107698	0.287403	NA	0.0827653	0.0136953	NA	0.237799	0.0337371
tir1afb12*	tir1afb25	0.0131114	0.569456	0.0445025	5.35835e-05	1.34051e-05	NA	0.232412	0.00464001	NA	0.237813	1.15439e-06
tir1afb12*	tir1afb34	0.695304	0.00120934	0.0346312	0.457809	0.480902	NA	0.00110919	6.75165e-07	NA	0.000533612	4.08555e-07
tir1afb12*	tir1afb35	0.0410126	0.000926405	0.000174207	0.0283276	0.0588794	NA	0.0446145	0.257305	NA	0.284529	0.662043
tir1afb12*	tir1afb45	0.800876	0.000568694	6.33726e-10	0.0776719	0.00116597	NA	0.000431128	1.12831e-05	NA	0.0328199	0.000732606
tir1afb12*	tir1afb123	0.00207835	0.116231	0.511125	5.35835e-05	0.000132647	NA	0.971927	0.00701423	NA	0.00148198	0.000286386
tir1afb12*	tir1afb124	0.0183896	0.0808453	0.0881634	0.0469883	0.0722863	NA	0.831081	0.211843	NA	0.194815	0.76452
tir1afb12*	tir1afb125	0.29162	0.0319722	0.000286549	0.0030623	1.76933e-05	NA	0.214937	1.5701e-05	NA	0.122966	5.65605e-10
tir1afb12*	tir1afb134	0.0624292	0.00116779	0.0171039	0.559516	0.396924	NA	2.63212e-05	3.80759e-06	NA	5.07401e-05	6.60874e-06
tir1afb12*	tir1afb135	0.081424	0.0143428	0.238113	0.00556526	0.00019889	NA	0.02208	0.0753621	NA	0.911955	0.916393
tir1afb12*	tir1afb145	0.937061	0.000523033	0.00326387	0.123597	0.0373179	NA	5.6666e-05	0.00238388	NA	0.000644626	0.045056
tir1afb12*	tir1afb245	0.00049289	0.399821	0.00495948	3.05005e-05	3.96377e-10	NA	0.0024923	0.0584399	NA	9.46141e-06	0.000318461
tir1afb12*	tir1afb345	5.3851e-05	0.507858	0.000114141	0.000661739	0.000104009	NA	0.00148843	2.48183e-05	NA	0.166963	0.00109082
tir1afb12*	tir1afb1245	0.000161586	0.295682	0.00646882	3.34084e-05	0.00214009	NA	0.0228635	0.00137305	NA	0.000151895	2.83888e-06
tir1afb12*	tir1afb1345	0.000345346	0.697168	0.000720768	0.000390589	0.000681893	NA	0.00406826	0.000295635	NA	0.390803	0.040866
tir1afb13	tir1afb14	0.048672	0.104279	0.810343	0.023501	0.524762	NA	0.0749784	0.00091246	NA	0.10616	0.00130779
tir1afb13	tir1afb15	0.286886	0.448246	0.378627	0.862657	0.0192973	NA	0.184273	0.113621	NA	0.6927	0.541337
tir1afb13	tir1afb23	1.9096e-05	0.0014709	0.616148	9.06899e-10	3.35478e-06	NA	7.65866e-05	8.45704e-12	NA	3.75461e-09	7.1554e-13
tir1afb13	tir1afb2-1 3-1	0.0027124	5.59702e-05	0.0044887	2.8692e-09	3.16057e-07	NA	0.000473345	7.72417e-07	NA	1.96095e-08	9.71886e-08
tir1afb13	tir1afb24	0.419649	0.265121	0.0137794	3.63217e-06	0.0773977	NA	0.0741904	0.301442	NA	0.0101229	0.134573
tir1afb13	tir1afb25	0.000807486	0.0208068	0.362246	5.85557e-10	3.40163e-06	NA	0.0375487	1.42692e-07	NA	0.00501516	7.36083e-09
tir1afb13	tir1afb34	0.407535	0.662809	0.804334	0.00546839	0.967172	NA	0.76381	0.044991	NA	0.749546	0.043539
tir1afb13	tir1afb35	0.00277467	0.495507	0.000735625	1.30585e-05	0.0106379	NA	0.141325	0.0264354	NA	0.00903098	0.00654707
tir1afb13	tir1afb45	0.303358	0.0626501	5.12592e-06	0.000109518	0.000208829	NA	0.431319	0.212727	NA	0.225999	0.802185
tir1afb13	tir1afb123	0.00163882	0.00067651	0.604766	5.85557e-10	3.80723e-05	NA	0.00632087	8.85723e-05	NA	3.48813e-06	2.03435e-05
tir1afb13	tir1afb124	0.09239	0.0918166	0.115904	0.000739259	0.0140553	NA	0.00175443	0.000731493	NA	5.73986e-05	4.92908e-05
tir1afb13	tir1afb125	0.0258479	0.110197	0.0105308	2.86766e-05	3.16457e-06	NA	0.0963807	2.35871e-11	NA	0.000248956	6.61692e-14
tir1afb13	tir1afb134	0.428779	0.0768029	0.271533	0.41092	0.127275	NA	0.0502984	0.21253	NA	0.152962	0.586635
tir1afb13	tir1afb135	0.0250227	0.237486	0.647802	5.74627e-07	3.1726e-05	NA	0.253942	0.0281715	NA	0.000764774	0.000859414
tir1afb13	tir1afb145	0.214514	0.021746	0.00988813	0.000311712	0.0101257	NA	0.101204	0.240559	NA	0.784977	0.0212134
tir1afb13	tir1afb245	0.000134311	0.0114573	0.0231311	1.1229e-08	1.32115e-10	NA	0.84352	0.000597923	NA	5.42416e-09	7.65052e-05
tir1afb13	tir1afb345	6.38147e-06	0.0292237	9.10169e-05	1.94487e-08	1.6405e-05	NA	0.903082	0.835406	NA	0.024538	0.012115
tir1afb13	tir1afb1245	3.86153e-05	0.0287026	0.0286232	4.22211e-09	0.00121866	NA	0.206381	1.28275e-06	NA	5.30567e-08	5.28317e-07
tir1afb13	tir1afb1345	6.31664e-08	0.0228335	0.00112644	7.97817e-09	0.000127375	NA	0.711528	0.138644	NA	0.00659285	0.000139617
tir1afb14	tir1afb15	0.0226	0.427027	0.48243	0.0199415	0.0128614	NA	0.378923	0.00228131	NA	0.0499172	0.000223067
tir1afb14	tir1afb23	6.70222e-05	0.00165655	0.50304	1.03068e-09	2.21863e-06	NA	6.27696e-10	3.70403e-12	NA	1.34351e-11	1.52913e-11
tir1afb14	tir1afb2-1 3-1	0.000377697	0.000564769	0.00251018	3.68208e-09	4.71418e-09	NA	2.64437e-08	9.04059e-08	NA	7.9298e-10	4.84938e-08
tir1afb14	tir1afb24	0.133888	0.0346549	0.00771081	1.0621e-07	0.0997856	NA	1.96945e-06	0.0030758	NA	2.00309e-07	0.00194688
tir1afb14	tir1afb25	0.000312204	0.00378874	0.275012	3.02489e-10	9.81749e-06	NA	1.30952e-05	9.11164e-09	NA	0.000864638	5.62133e-09
tir1afb14	tir1afb34	0.0364872	0.140678	0.678063	3.80932e-05	0.547231	NA	0.0268333	0.12741	NA	0.0525971	0.176203
tir1afb14	tir1afb35	0.000580881	0.170692	0.000909021	3.30362e-07	0.00613135	NA	1.16316e-05	0.000312873	NA	3.6832e-07	0.000175703
tir1afb14	tir1afb45	0.0252458	0.85701	3.68799e-06	1.53827e-06	0.000160461	NA	0.173619	0.102249	NA	0.00186733	0.0143039
tir1afb14	tir1afb123	0.00011418	0.00262704	0.558764	3.02489e-10	8.63748e-05	NA	2.55326e-05	1.62415e-05	NA	8.71697e-07	8.02173e-06
tir1afb14	tir1afb124	0.720633	0.0172929	0.0812802	1.35654e-05	0.0105189	NA	1.32587e-07	3.11671e-07	NA	1.96001e-08	1.60418e-07
tir1afb14	tir1afb125	0.00271001	0.0225106	0.0136659	7.01723e-07	1.07259e-06	NA	0.000637618	8.74179e-14	NA	1.50037e-05	2.16868e-13
tir1afb14	tir1afb134	0.0902599	0.922044	0.320582	0.00610591	0.188093	NA	0.690401	0.000795208	NA	0.838483	0.000190685
tir1afb14	tir1afb135	0.00258873	0.765716	0.681712	4.32767e-08	6.62618e-06	NA	5.94633e-05	8.77147e-05	NA	7.18037e-08	2.09243e-05
tir1afb14	tir1afb145	0.0202895	0.565064	0.011028	3.45293e-06	0.013754	NA	0.831185	0.000280061	NA	0.0603969	7.12409e-05
tir1afb14	tir1afb245	6.84068e-05	0.00234945	0.0276097	9.36563e-09	4.18006e-10	NA	0.000714818	0.000126861	NA	4.96658e-13	4.74444e-05
tir1afb14	tir1afb345	1.66489e-05	0.00665011	0.000107129	4.38103e-09	2.9863e-07	NA	0.00915606	3.44749e-06	NA	6.85323e-06	1.79765e-09
tir1afb14	tir1afb1245	2.45202e-05	0.0064297	0.0323178	4.88664e-09	0.00199361	NA	1.06578e-05	7.67186e-07	NA	3.14492e-12	7.14335e-07
tir1afb14	tir1afb1345	0.000152125	0.00528131	0.00123625	3.10345e-09	0.000117679	NA	0.00110362	2.38664e-08	NA	5.89666e-07	4.32226e-11
tir1afb15	tir1afb23	0.00132915	0.00652749	0.263942	5.92332e-09	0.000282432	NA	1.93829e-09	1.61889e-11	NA	7.01632e-11	2.83382e-11
tir1afb15	tir1afb2-1 3-1	0.0231254	0.00172962	0.00446768	1.25133e-08	6.02685e-06	NA	9.07367e-08	4.58416e-07	NA	3.43026e-09	1.68032e-07
tir1afb15	tir1afb24	0.159507	0.146696	0.00989358	1.10186e-05	0.568478	NA	9.50494e-06	0.0474216	NA	2.6679e-05	0.0610437
tir1afb15	tir1afb25	0.0177399	0.0130407	0.13457	3.13545e-09	0.000172746	NA	5.32476e-05	6.37333e-08	NA	0.00289332	2.0538e-08
tir1afb15	tir1afb34	0.898402	0.581462	0.371751	0.0118992	0.0317618	NA	0.118689	0.368913	NA	0.918939	0.0617553
tir1afb15	tir1afb35	0.0437957	0.675844	0.00300827	4.16672e-05	0.744509	NA	6.31062e-05	0.00349415	NA	3.77357e-05	0.00308597
tir1afb15	tir1afb45	0.991234	0.461934	7.78089e-05	0.000297919	0.0222043	NA	0.490211	0.882323	NA	0.0470389	0.498913
tir1afb15	tir1afb123	0.00255349	0.00684617	0.423598	3.13545e-09	0.00146097	NA	7.27486e-05	4.80218e-05	NA	3.1544e-06	2.00039e-05
tir1afb15	tir1afb124	0.0409164	0.0820019	0.0422433	0.00115057	0.78756	NA	5.01307e-07	1.16189e-05	NA	3.82854e-07	9.85065e-06
tir1afb15	tir1afb125	0.236669	0.104226	0.0750374	4.21346e-05	0.00024899	NA	0.00193033	7.10268e-13	NA	8.25095e-05	6.61623e-13
tir1afb15	tir1afb134	0.172135	0.440941	0.582137	0.525124	0.482117	NA	0.230241	0.607133	NA	0.115046	0.928171
tir1afb15	tir1afb135	0.0679531	0.642132	0.809296	2.35036e-06	0.00393508	NA	0.00033563	0.00186871	NA	2.73409e-06	0.000399107
tir1afb15	tir1afb145	0.763329	0.176425	0.0143802	0.00078408	0.3189	NA	0.534481	0.0138653	NA	0.879111	0.00567276
tir1afb15	tir1afb245	0.00120772	0.00791306	0.0537663	3.33734e-08	1.14281e-09	NA	0.00494965	0.000351282	NA	3.45675e-12	7.99088e-05
tir1afb15	tir1afb345	0.000212947	0.030134	6.90117e-05	9.59324e-08	0.00165604	NA	0.0503384	0.0191484	NA	0.000482109	5.73437e-05
tir1afb15	tir1afb1245	0.000459396	0.015236	0.0490311	1.67071e-08	0.00714766	NA	5.46684e-05	2.43371e-06	NA	2.90653e-11	1.28624e-06
tir1afb15	tir1afb1345	0.000812495	0.0233991	0.00115702	4.43624e-08	0.0125074	NA	0.00692762	4.58542e-05	NA	4.21357e-05	1.72083e-07
tir1afb23	tir1afb2-1 3-1	0.0381769	0.0635415	0.078869	0.0860226	0.604303	NA	0.272742	0.058959	NA	0.579616	0.127241
tir1afb23	tir1afb24	2.11894e-05	0.0515447	0.165829	0.000414124	0.000163382	NA	3.39632e-05	1.13669e-07	NA	1.36781e-08	1.91879e-10
tir1afb23	tir1afb25	0.0210325	0.941039	0.765332	0.800023	0.373948	NA	0.0011568	0.00359748	NA	0.0348874	0.039412
tir1afb23	tir1afb34	0.00217738	0.00079022	0.836099	4.85081e-08	1.17995e-05	NA	1.02012e-07	5.12399e-13	NA	5.24073e-11	3.90583e-13
tir1afb23	tir1afb35	0.0095567	0.000652614	0.0013713	2.37615e-05	0.000601308	NA	1.33506e-05	5.14707e-06	NA	1.432e-08	1.84365e-08
tir1afb23	tir1afb45	0.00185385	0.000292197	0.000187452	6.01887e-06	0.132665	NA	9.77187e-08	2.54313e-11	NA	4.58319e-09	3.09793e-12
tir1afb23	tir1afb123	0.779851	0.508768	0.761178	0.800023	0.601029	NA	0.124276	0.693251	NA	0.342931	0.987727
tir1afb23	tir1afb124	0.000101186	0.0281624	0.402103	0.00568825	0.00072064	NA	0.0865241	9.36825e-09	NA	1.16135e-05	6.12048e-11
tir1afb23	tir1afb125	0.00369917	0.0115732	0.0190519	0.169717	0.788861	NA	0.00480006	0.0258239	NA	0.00288755	0.0120602
tir1afb23	tir1afb134	5.4452e-06	0.00058562	0.191872	6.88615e-08	0.000194992	NA	8.27271e-10	1.48354e-11	NA	7.87322e-12	2.6828e-11
tir1afb23	tir1afb135	0.0817968	0.00848502	0.556996	0.000289627	0.16138	NA	4.92524e-06	8.80575e-08	NA	2.62795e-07	8.40521e-09
tir1afb23	tir1afb145	0.0045405	0.000272864	0.00606004	3.27224e-06	0.0338309	NA	1.35992e-09	6.14479e-10	NA	5.11135e-11	1.38462e-11
tir1afb23	tir1afb245	0.79446	0.776769	0.0158663	0.0260947	2.07571e-05	NA	1.47512e-07	0.0634585	NA	0.69696	0.114174
tir1afb23	tir1afb345	0.0205801	0.21745	2.37078e-05	0.0277269	0.13976	NA	7.94336e-08	5.60955e-10	NA	7.69178e-09	5.03399e-10
tir1afb23	tir1afb1245	0.223391	0.4749	0.0193206	0.0679562	0.165093	NA	3.08767e-06	0.045721	NA	0.0551225	0.224816
tir1afb23	tir1afb1345	0.010973	0.328399	0.000520613	0.0654574	0.207321	NA	2.8394e-07	5.41624e-10	NA	2.28986e-08	4.35494e-10
tir1afb2-1 3-1	tir1afb24	0.001012	0.00603207	0.323339	3.91616e-05	1.02266e-05	NA	0.00119171	2.45143e-05	NA	3.91338e-07	3.09453e-07
tir1afb2-1 3-1	tir1afb25	0.97659	0.249436	0.0912631	0.274414	0.568198	NA	0.0158447	0.488153	NA	0.06311	0.783667
tir1afb2-1 3-1	tir1afb34	0.0258466	1.61919e-05	0.059124	3.37477e-08	2.53333e-06	NA	2.81877e-06	9.06758e-08	NA	2.34985e-09	3.54546e-08
tir1afb2-1 3-1	tir1afb35	0.575957	1.33766e-05	9.75802e-05	2.95086e-06	1.8148e-05	NA	0.000457882	0.000797908	NA	3.8569e-07	7.30536e-06
tir1afb2-1 3-1	tir1afb45	0.027484	5.34564e-05	1.87324e-08	1.32889e-06	0.030918	NA	1.65719e-06	1.32238e-07	NA	4.93627e-08	4.79457e-08
tir1afb2-1 3-1	tir1afb123	0.0969216	0.0596463	0.625403	0.274414	0.843719	NA	0.45997	0.428487	NA	0.592078	0.365497
tir1afb2-1 3-1	tir1afb124	0.000630244	0.00104035	0.211543	0.00136562	2.94813e-05	NA	0.486495	0.000219094	NA	0.000115038	5.16963e-06
tir1afb2-1 3-1	tir1afb125	0.145741	0.000239088	0.000205402	0.0451792	0.373733	NA	0.0305629	0.639343	NA	0.00852276	0.893358
tir1afb2-1 3-1	tir1afb134	0.00116518	0.000152889	0.0226447	8.2925e-08	1.87006e-05	NA	2.21741e-08	5.62347e-07	NA	3.64399e-10	1.70865e-07
tir1afb2-1 3-1	tir1afb135	0.828948	0.00385655	0.278454	1.29373e-05	0.0264535	NA	0.000159694	9.90436e-05	NA	4.31734e-06	1.25565e-05
tir1afb2-1 3-1	tir1afb145	0.0587527	9.33327e-05	0.00344241	9.29906e-07	0.0095294	NA	4.52764e-08	5.14825e-06	NA	1.87005e-09	5.12707e-07
tir1afb2-1 3-1	tir1afb245	0.0303816	0.254753	0.00451664	0.343436	1.15652e-05	NA	6.25785e-06	0.618161	NA	0.81798	0.0336752
tir1afb2-1 3-1	tir1afb345	0.00189305	0.0136568	7.80891e-05	0.000735655	0.0142943	NA	2.96088e-06	1.99056e-06	NA	1.75801e-07	1.00165e-06
tir1afb2-1 3-1	tir1afb1245	0.00912223	0.837036	0.00725273	0.899499	0.216439	NA	0.000127503	0.962444	NA	0.208003	0.0340635
tir1afb2-1 3-1	tir1afb1345	0.00357625	0.0239636	0.000680588	0.00132945	0.058158	NA	1.1239e-05	6.51687e-06	NA	5.218e-07	2.58776e-06
tir1afb24	tir1afb25	0.000413445	0.104714	0.216406	0.000502235	8.93589e-05	NA	0.481753	3.78134e-05	NA	0.0697623	5.8627e-08
tir1afb24	tir1afb34	0.235842	0.166368	0.121074	0.00306999	0.0992447	NA	0.00271397	0.0221703	NA	7.96916e-05	0.00948997
tir1afb24	tir1afb35	0.00131577	0.132456	0.000150649	0.441192	0.389805	NA	0.566225	0.242458	NA	0.882451	0.168466
tir1afb24	tir1afb45	0.171258	0.0248348	2.19817e-08	0.14107	0.0103449	NA	0.00106838	0.0660721	NA	0.110783	0.259866
tir1afb24	tir1afb123	0.00028403	0.0281075	0.777948	0.000502235	0.000740939	NA	0.0672235	0.000273551	NA	0.000154779	3.85818e-05
tir1afb24	tir1afb124	0.251256	0.816848	0.509953	0.688182	0.429932	NA	0.0106804	0.0929953	NA	0.00277231	0.0531339
tir1afb24	tir1afb125	0.0133429	1	0.000391072	0.246125	0.000163063	NA	0.792438	1.63689e-06	NA	0.0117614	3.3411e-09
tir1afb24	tir1afb134	0.836237	0.0270301	0.0359909	0.000104964	0.868033	NA	3.33181e-06	0.0713597	NA	2.4796e-06	0.0656294
tir1afb24	tir1afb135	0.0114019	0.0829165	0.334643	0.686045	0.00208851	NA	0.249845	0.363708	NA	0.0717434	0.0563451
tir1afb24	tir1afb145	0.123801	0.00916665	0.00430062	0.0728891	0.17762	NA	7.37462e-06	0.920273	NA	0.000201406	0.656978
tir1afb24	tir1afb245	3.47988e-05	0.0612566	0.00622482	3.56307e-05	1.835e-09	NA	0.00259751	0.00202106	NA	1.45049e-09	8.21932e-05
tir1afb24	tir1afb345	3.5023e-06	0.324687	9.29861e-05	0.0498693	0.00110111	NA	0.00294465	0.211317	NA	0.673865	0.883303
tir1afb24	tir1afb1245	1.07899e-05	0.0764232	0.00948159	3.88922e-05	0.00485813	NA	0.247985	1.79757e-05	NA	2.96918e-08	1.22832e-07
tir1afb24	tir1afb1345	5.85225e-05	0.24776	0.000789315	0.017822	0.00592499	NA	0.0168546	0.807503	NA	0.66436	0.30436
tir1afb25	tir1afb34	0.0215105	0.016621	0.608949	7.25609e-08	6.50336e-06	NA	0.00219207	8.20957e-09	NA	0.00309935	2.51214e-09
tir1afb25	tir1afb35	0.514922	0.0145833	0.000501835	3.69159e-05	0.000303616	NA	0.253023	0.00177698	NA	0.0774692	3.03108e-06
tir1afb25	tir1afb45	0.0219805	0.00337362	6.2667e-05	8.03957e-06	0.0319307	NA	0.000792585	3.47113e-08	NA	0.0195505	4.22097e-09
tir1afb25	tir1afb123	0.08069	0.771225	0.863724	1	0.807978	NA	0.204877	0.202147	NA	0.161436	0.264588
tir1afb25	tir1afb124	0.00052021	0.108781	0.55501	0.00488315	0.000316514	NA	0.0796126	0.000221554	NA	0.623312	7.70879e-07
tir1afb25	tir1afb125	0.113445	0.0775707	0.00669273	0.146568	0.245365	NA	0.804303	0.142348	NA	0.953571	0.827723
tir1afb25	tir1afb134	0.000294054	0.00326042	0.124157	3.77416e-08	8.68781e-05	NA	9.58233e-06	7.967e-08	NA	0.000968394	2.07436e-08
tir1afb25	tir1afb135	0.801534	0.00967166	0.496491	0.000495075	0.0366309	NA	0.11169	0.000138753	NA	0.234901	4.22027e-06
tir1afb25	tir1afb145	0.0497003	0.00147766	0.00524024	3.99895e-06	0.00878671	NA	2.41221e-05	2.71057e-06	NA	0.00324425	5.75233e-08
tir1afb25	tir1afb245	0.0175546	0.878764	0.00991036	0.137205	0.000954707	NA	0.00421664	0.98988	NA	0.0468144	0.0241353
tir1afb25	tir1afb345	0.000679577	0.333625	2.62224e-05	0.0306165	0.0309939	NA	0.00278383	4.55899e-07	NA	0.0545884	1.68659e-07
tir1afb25	tir1afb1245	0.00470894	0.552472	0.0151873	0.243285	0.341375	NA	0.11059	0.419462	NA	0.176812	0.0140535
tir1afb25	tir1afb1345	0.00143718	0.431847	0.000560698	0.0674778	0.0520246	NA	0.0113853	1.75312e-06	NA	0.0954229	4.36826e-07
tir1afb34	tir1afb35	0.047568	0.764218	0.00206159	0.0143468	0.0189535	NA	0.0108645	0.00157777	NA	9.50477e-05	0.000543015
tir1afb34	tir1afb45	0.892635	0.0871288	0.000246471	0.0877569	0.000470567	NA	0.488138	0.635743	NA	0.0617661	0.0894144
tir1afb34	tir1afb123	0.00323114	6.51398e-05	0.687164	7.25609e-08	5.1876e-05	NA	0.000738436	2.47185e-05	NA	2.88806e-06	9.761e-06
tir1afb34	tir1afb124	0.0633518	0.0387552	0.300768	0.0689114	0.0232097	NA	2.10381e-05	4.81463e-06	NA	5.58079e-07	6.66187e-07
tir1afb34	tir1afb125	0.219461	0.03469	0.0297284	0.00260014	1.38204e-05	NA	0.0228667	3.24968e-13	NA	8.72568e-05	1.08798e-14
tir1afb34	tir1afb134	0.259522	0.106687	0.250394	0.0681115	0.149613	NA	0.0168919	0.211977	NA	0.112172	0.0543441
tir1afb34	tir1afb135	0.0644804	0.306918	0.604021	0.000510073	0.000118974	NA	0.0364994	0.000758361	NA	5.32357e-06	5.71001e-05
tir1afb34	tir1afb145	0.686194	0.0307242	0.00707291	0.184466	0.0132947	NA	0.0490369	0.00578554	NA	0.957162	0.000504048
tir1afb34	tir1afb245	0.00192489	0.0106926	0.021506	1.04624e-07	1.06426e-09	NA	0.396609	0.000170268	NA	3.92998e-12	5.11341e-05
tir1afb34	tir1afb345	0.000411715	0.0168389	2.62575e-05	6.80055e-06	8.32997e-05	NA	0.780199	0.0167536	NA	0.000899449	1.98786e-05
tir1afb34	tir1afb1245	0.000804271	0.0247443	0.0234405	4.56936e-08	0.00114474	NA	0.0171559	2.84651e-07	NA	3.94899e-11	3.69699e-07
tir1afb34	tir1afb1345	0.00120056	0.0141309	0.000557325	1.73175e-06	0.000286823	NA	0.309144	0.000344176	NA	9.01723e-05	2.33639e-07
tir1afb35	tir1afb45	0.0516095	0.114102	0.00315023	0.434752	0.0404694	NA	0.00368339	0.00489348	NA	0.0982773	0.0173897
tir1afb35	tir1afb123	0.0366144	3.76678e-05	0.0518445	3.69159e-05	0.00232878	NA	0.0350641	0.0019837	NA	0.000170868	0.00017294
tir1afb35	tir1afb124	0.00099758	0.0274025	0.000181606	0.89124	0.967697	NA	0.00418679	0.809266	NA	0.00446545	0.819725
tir1afb35	tir1afb125	0.290984	0.021912	0.0411038	0.0953375	0.000574124	NA	0.538166	8.19339e-05	NA	0.0142906	4.64651e-07
tir1afb35	tir1afb134	0.00116959	0.134975	0.0491477	0.000413245	0.332561	NA	1.45679e-05	0.00516015	NA	2.94795e-06	0.00329601
tir1afb35	tir1afb135	0.818815	0.358273	0.393215	0.210612	0.00874812	NA	0.56413	0.693663	NA	0.105944	0.644279
tir1afb35	tir1afb145	0.108194	0.0383628	0.257348	0.251979	0.437441	NA	3.72175e-05	0.161235	NA	0.000214283	0.263133
tir1afb35	tir1afb245	0.00831808	0.00974072	0.340761	4.07917e-06	2.68042e-09	NA	0.0167731	0.0162986	NA	2.04464e-09	0.000170323
tir1afb35	tir1afb345	0.000468025	0.0134023	0.000597975	0.00579835	0.00425555	NA	0.0135001	0.0160866	NA	0.595072	0.070216
tir1afb35	tir1afb1245	0.00243131	0.0225232	0.885716	3.22643e-06	0.00876042	NA	0.618417	0.000524664	NA	4.95759e-08	5.45472e-07
tir1afb35	tir1afb1345	0.00128677	0.0114935	0.00678594	0.00158238	0.0231422	NA	0.0664224	0.0947245	NA	0.777297	0.393104
tir1afb45	tir1afb123	0.00312841	0.000640505	0.0108788	8.03957e-06	0.0927411	NA	0.000282743	2.7186e-05	NA	2.06893e-05	1.64325e-05
tir1afb45	tir1afb124	0.0448242	0.00610723	2.12195e-05	0.502594	0.0433144	NA	9.91887e-06	0.000125615	NA	0.000389369	0.0013032
tir1afb45	tir1afb125	0.254686	0.00711301	0.000125628	0.0354472	0.177272	NA	0.00882598	2.10817e-10	NA	0.00173987	2.2947e-11
tir1afb45	tir1afb134	0.186437	0.930102	0.00276213	0.00250982	0.0100872	NA	0.10891	0.667382	NA	0.00386812	0.527153
tir1afb45	tir1afb135	0.0730364	0.864483	0.0955423	0.0495805	0.767855	NA	0.0116218	0.00410987	NA	0.00700106	0.00325283
tir1afb45	tir1afb145	0.776305	0.38364	0.351453	0.706348	0.363315	NA	0.250469	0.0359575	NA	0.0758192	0.0833099
tir1afb45	tir1afb245	0.00165301	0.00186726	0.00952895	2.03522e-06	8.80431e-07	NA	0.127796	0.000174976	NA	3.53478e-09	5.7225e-05
tir1afb45	tir1afb345	0.000316643	0.00273095	0.016742	0.00101815	0.737855	NA	0.329269	0.186991	NA	0.23715	0.146724
tir1afb45	tir1afb1245	0.00065699	0.00782534	0.0767324	1.50435e-06	0.0476196	NA	0.00586318	1.91765e-07	NA	5.57003e-08	8.32049e-08
tir1afb45	tir1afb1345	0.00103525	0.00230989	0.0759894	0.000281388	0.803268	NA	0.104558	0.0151883	NA	0.071132	0.0112797
tir1afb123	tir1afb124	0.000167488	0.00879114	0.944775	0.00488315	0.00237316	NA	0.858629	0.00197735	NA	0.00896945	0.000238028
tir1afb123	tir1afb125	0.0102982	0.00203127	0.164486	0.146568	0.456174	NA	0.193657	0.557949	NA	0.0619811	0.283858
tir1afb123	tir1afb134	0.000553603	0.0012014	0.307195	3.77416e-08	0.000665854	NA	1.52285e-05	5.64431e-05	NA	6.83349e-07	2.03707e-05
tir1afb123	tir1afb135	0.12354	0.011833	0.487163	0.000495075	0.11436	NA	0.0167275	0.000885574	NA	0.00101438	0.000290714
tir1afb123	tir1afb145	0.00675126	0.000768554	0.019198	3.99895e-06	0.0264376	NA	3.35144e-05	0.000222662	NA	2.62294e-06	6.4464e-05
tir1afb123	tir1afb245	0.634357	0.903012	0.0999256	0.137205	0.00181504	NA	0.00170145	0.276056	NA	0.465656	0.183465
tir1afb123	tir1afb345	0.044851	0.0814308	0.00120331	0.0306165	0.106269	NA	0.000994036	0.0001061	NA	9.5918e-05	6.03219e-05
tir1afb123	tir1afb1245	0.224664	0.618407	0.0532666	0.243285	0.290409	NA	0.0171806	0.431413	NA	0.7338	0.473763
tir1afb123	tir1afb1345	0.0476217	0.134316	0.00131385	0.0674778	0.134943	NA	0.00283202	0.000248077	NA	0.000224093	0.000121286
tir1afb124	tir1afb125	0.00483532	0.743702	0.00178681	0.199199	0.000730043	NA	0.0995292	2.13901e-07	NA	0.534476	2.77578e-10
tir1afb124	tir1afb134	0.176733	0.00924504	0.0625814	0.00439691	0.366827	NA	1.07989e-07	2.14386e-05	NA	3.81935e-08	1.08689e-05
tir1afb124	tir1afb135	0.0037678	0.0547604	0.404286	0.488469	0.010516	NA	0.00142976	0.426386	NA	0.126066	0.737366
tir1afb124	tir1afb145	0.0345387	0.00314558	0.00401405	0.353889	0.431272	NA	2.44525e-07	0.0295256	NA	8.92445e-07	0.0759801
tir1afb124	tir1afb245	0.000101089	0.0589175	0.00558372	0.00101634	2.65999e-09	NA	3.81732e-05	0.0154355	NA	9.43875e-06	0.000288539
tir1afb124	tir1afb345	2.43033e-05	0.344223	2.66851e-05	0.0821376	0.00569575	NA	2.36187e-05	0.000158928	NA	0.00223121	0.00211596
tir1afb124	tir1afb1245	3.70242e-05	0.0861114	0.0104819	0.00129898	0.00854791	NA	0.00115698	0.000142426	NA	0.000434082	2.48582e-06
tir1afb124	tir1afb1345	0.000192323	0.251943	0.000527116	0.0459945	0.0250606	NA	9.80476e-05	0.00365838	NA	0.00996228	0.0803317
tir1afb125	tir1afb134	0.0138354	0.0117307	0.45841	0.000153695	0.000212321	NA	0.000404764	8.0049e-13	NA	1.53259e-05	6.31585e-13
tir1afb125	tir1afb135	0.303057	0.0696429	0.790195	0.345886	0.218583	NA	0.32838	1.86833e-06	NA	0.100558	2.55208e-07
tir1afb125	tir1afb145	0.424391	0.00414593	0.0484707	0.0210661	0.0443502	NA	0.000919139	8.3412e-09	NA	9.11365e-05	1.02062e-10
tir1afb125	tir1afb245	0.00329082	0.0422678	0.4062	0.0314811	5.52982e-06	NA	0.0471023	0.368847	NA	0.00431772	0.0268003
tir1afb125	tir1afb345	0.000354943	0.211213	0.000208436	0.890636	0.18929	NA	0.0303126	3.80532e-11	NA	0.00824625	2.9999e-11
tir1afb125	tir1afb1245	0.00111728	0.0703351	0.194614	0.0423244	0.13326	NA	0.351844	0.64162	NA	0.0426476	0.0122472
tir1afb125	tir1afb1345	0.0011798	0.152563	0.00263204	0.676642	0.276197	NA	0.0798304	6.52242e-11	NA	0.0209456	3.99428e-11
tir1afb134	tir1afb135	0.0154038	0.817203	0.981278	2.7296e-05	0.00244075	NA	6.10732e-05	0.00309425	NA	2.66398e-07	0.000427238
tir1afb134	tir1afb145	0.135786	0.457667	0.0272291	0.00596762	0.154846	NA	0.562909	0.0256318	NA	0.118304	0.00628651
tir1afb134	tir1afb245	2.48051e-05	0.00182384	0.21608	1.55267e-07	2.73032e-09	NA	0.000799232	0.000408147	NA	7.2587e-13	8.06887e-05
tir1afb134	tir1afb345	1.18145e-06	0.00366464	0.000101353	1.17186e-06	0.00147858	NA	0.00624335	0.0770489	NA	2.79828e-05	8.0525e-05
tir1afb134	tir1afb1245	7.9572e-06	0.0070419	0.111124	1.00818e-07	0.00426469	NA	1.92081e-05	2.65864e-06	NA	6.25065e-12	1.28644e-06
tir1afb134	tir1afb1345	6.02499e-06	0.00298429	0.000990052	5.50194e-07	0.00586819	NA	0.000915774	0.000251461	NA	3.04407e-06	2.32908e-07
tir1afb135	tir1afb145	0.123674	0.405764	0.191215	0.0225789	0.225287	NA	0.000168932	0.241131	NA	1.06884e-05	0.0866892
tir1afb135	tir1afb245	0.0682066	0.00731398	0.594002	1.40422e-05	3.27203e-07	NA	0.0731176	0.00685395	NA	9.92159e-08	0.000254399
tir1afb135	tir1afb345	0.0124768	0.0230935	0.020261	0.0780157	0.981421	NA	0.0487845	0.0130284	NA	0.0504543	0.0132172
tir1afb135	tir1afb1245	0.029997	0.0103657	0.382861	1.30692e-05	0.0569493	NA	0.877681	6.33599e-05	NA	3.56057e-06	1.07857e-06
tir1afb135	tir1afb1345	0.0189504	0.0185387	0.022754	0.025115	0.987171	NA	0.19883	0.123629	NA	0.193875	0.122025
tir1afb145	tir1afb245	0.00393932	0.000872344	0.113453	1.48117e-06	1.9865e-06	NA	0.00238625	0.00154939	NA	6.63386e-12	0.000129106
tir1afb145	tir1afb345	0.000812549	0.00136035	0.0157693	0.000441758	0.202114	NA	0.0196581	0.123585	NA	0.00154844	0.389185
tir1afb145	tir1afb1245	0.00168265	0.00397114	0.405826	1.06701e-06	0.0204482	NA	4.38471e-05	4.57579e-06	NA	7.51277e-11	4.28982e-07
tir1afb145	tir1afb1345	0.00192217	0.00113858	0.039546	0.000125848	0.265387	NA	0.00287591	0.863914	NA	0.000181451	0.522553
tir1afb245	tir1afb345	0.0377829	0.216422	0.000368932	0.00040253	1.6211e-07	NA	0.559181	0.000771035	NA	1.86579e-09	0.000151867
tir1afb245	tir1afb1245	0.325852	0.610835	0.447169	0.338801	0.342619	NA	0.0218867	0.577297	NA	0.0853345	0.348286
tir1afb245	tir1afb1345	0.0292497	0.297896	0.00329394	0.000616754	2.16399e-06	NA	0.720826	0.00175888	NA	5.11518e-09	0.000223255
tir1afb345	tir1afb1245	0.220445	0.189698	0.0034727	0.00063413	0.0564866	NA	0.0208114	9.87249e-06	NA	4.42527e-08	3.68964e-06
tir1afb345	tir1afb1345	0.959331	0.818397	0.843771	0.627846	0.970724	NA	0.426917	0.00323412	NA	0.444387	0.00355734
tir1afb1245	tir1afb1345	0.14356	0.233741	0.0103148	0.00109221	0.059139	NA	0.111366	1.96001e-05	NA	1.4414e-07	5.27431e-06

## Sheet: ANOVA_Figure6
Genotype	Response
WT_IAA	0.439105485706484			R version 3.6.1 (2019-07-05) -- "Action of the Toes"
WT_IAA	0.45280991370483			Copyright (C) 2019 The R Foundation for Statistical Computing
WT_IAA	0.225602640656309			Platform: x86_64-apple-darwin15.6.0 (64-bit)
WT_IAA	0.342090278642246
WT_IAA	0.549825120769068			R is free software and comes with ABSOLUTELY NO WARRANTY.
WT_IAA	0.476575820486771			You are welcome to redistribute it under certain conditions.
WT_IAA	0.357225865260673			Type 'license()' or 'licence()' for distribution details.
WT_IAA	0.6933312987644
WT_IAA	0.460789707222854			Natural language support but running in an English locale
WT_IAA	0.488849089865036
WT_IAA	0.281504563725509			R is a collaborative project with many contributors.
WT_IAA	0.287792987965258			Type 'contributors()' for more information and
WT_IAA	0.236141172313265			'citation()' on how to cite R or R packages in publications.
WT_IAA	0.447302121439672
WT_IAA	0.59089503632107			Type 'demo()' for some demos, 'help()' for on-line help, or
WT_IAA	0.242689807211208			'help.start()' for an HTML browser interface to help.
WT_IAA	0.412217051026185			Type 'q()' to quit R.
WT_IAA	0.378042717916388
WT_IAA	0.433684430327392			> anovadata1 =read.csv(file.choose())
WT_IAA	0.084611832356874			> summary (anovadata1)
WT_IAA	0.106339422316276			Genotype Response
WT_IAA	0.262682659449301			tir1afb1.2_IAA: 66 Min. :-0.02875
WT_IAA	0.134008488971165			tir1afb3_IAA : 66 1st Qu.: 0.42374
WT_IAA	0.195114625204293			afb4.5_IAA : 59 Median : 0.66139
WT_IAA	0.0871272020527727			WT_IAA : 59 Mean : 0.69375
WT_IAA	0.274218665296009			afb1_IAA : 56 3rd Qu.: 0.93501
WT_IAA	0.284453617851738			afb1comp_IAA : 55 Max. : 1.83123
WT_IAA	0.207084315481329			(Other) :541
WT_IAA	0.156169763360895			> aov(Response ~ Genotype, data=anovadata1)
WT_IAA	0.2262531673018			Call:
WT_IAA	0.33532480152914			aov(formula = Response ~ Genotype, data = anovadata1)
WT_IAA	0.0807086724839275
WT_IAA	0.0710375096876268			Terms:
WT_IAA	0.191775255090773			Genotype Residuals
WT_IAA	0.342914279059868			Sum of Squares 45.46403 58.67916
WT_IAA	0.313250264025475			Deg. of Freedom 17 884
WT_IAA	0.419156001911424
WT_IAA	0.413821683418396			Residual standard error: 0.2576415
WT_IAA	0.186440936597747			Estimated effects may be unbalanced
WT_IAA	0.234883487465315			> aov2 <- aov(Response ~ Genotype, data=anovadata1)
WT_IAA	0.157297342879745			> summary (aov2)
WT_IAA	0.176639668472348			Df Sum Sq Mean Sq F value Pr(>F)
WT_IAA	0.199928522380928			Genotype 17 45.46 2.6744 40.29 <2e-16 ***
WT_IAA	0.140470386983041			Residuals 884 58.68 0.0664
WT_IAA	0.332982905605371			---
WT_IAA	0.431516008175755			Signif. codes: 0 ‘***’ 0.001 ‘**’ 0.01 ‘*’ 0.05 ‘.’ 0.1 ‘ ’ 1
WT_IAA	0.352281862754941			> model.tables(aov2, "means")
WT_IAA	0.328255745314803			Tables of means
WT_IAA	0.294775307293529			Grand mean
WT_IAA	0.21185484421493
WT_IAA	0.203788313810842			0.693754
WT_IAA	0.152656919475241
WT_IAA	0.263072975436597			Genotype
WT_IAA	0.300499941773849			afb1_IAA afb1.2.3.4.5_IAA afb1comp_IAA afb2.3_IAA afb4.5_IAA tir1_IAA
WT_IAA	0.251710443362019			0.9398 0.9212 0.4802 0.5686 0.4002 0.5068
WT_IAA	0.102089314899067			rep 56.0000 45.0000 55.0000 20.0000 59.0000 51.0000
WT_IAA	0.0483124455384712			tir1afb1_IAA tir1afb1.2_IAA tir1afb1.2.4.5_IAA tir1afb1.3_IAA
WT_IAA	0.266759293094378			0.8748 0.75 1.025 0.8616
WT_IAA	0.226166430415735			rep 51.0000 66.00 38.000 50.0000
afb1_IAA	1.15763346408437			tir1afb1.3.4_IAA tir1afb1.3.4.5_IAA tir1afb1.3.5_IAA tir1afb2_IAA
afb1_IAA	1.17945345978972			0.893 0.9999 0.7804 0.4563
afb1_IAA	1.17838646733469			rep 48.000 48.0000 45.0000 49.0000
afb1_IAA	1.51619627859707			tir1afb2.3_IAA tir1afb3_IAA tir1afb3.4.5_IAA_RESP WT_IAA
afb1_IAA	1.1425355208457			0.5663 0.5406 0.8333 0.2855
afb1_IAA	0.980726115040458			rep 47.0000 66.0000 49.0000 59.0000
afb1_IAA	1.26390591260532			> TukeyHSD(aov2)
afb1_IAA	0.894779872787825			Tukey multiple comparisons of means
afb1_IAA	1.06277783483224			95% family-wise confidence level
afb1_IAA	1.10204315717732
afb1_IAA	1.30695905816576			Fit: aov(formula = Response ~ Genotype, data = anovadata1)
afb1_IAA	1.28359192340061
afb1_IAA	1.02260556890037			$Genotype
afb1_IAA	1.2057548238062			diff lwr upr
afb1_IAA	1.22794826687082			afb1.2.3.4.5_IAA-afb1_IAA -0.018601746 -0.19908678 0.161883285
afb1_IAA	1.39434574023269			afb1comp_IAA-afb1_IAA -0.459653048 -0.63079911 -0.288506988
afb1_IAA	0.852206873832144			afb2.3_IAA-afb1_IAA -0.371272707 -0.60611621 -0.136429200
afb1_IAA	1.06656565804759			afb4.5_IAA-afb1_IAA -0.539648392 -0.70784207 -0.371454712
afb1_IAA	1.24427325143277			tir1_IAA-afb1_IAA -0.433033117 -0.60753237 -0.258533869
afb1_IAA	0.476892277775481			tir1afb1_IAA-afb1_IAA -0.065038594 -0.23953784 0.109460654
afb1_IAA	0.783279161237232			tir1afb1.2_IAA-afb1_IAA -0.189801599 -0.35359436 -0.026008836
afb1_IAA	0.958425972730341			tir1afb1.2.4.5_IAA-afb1_IAA 0.084865416 -0.10461263 0.274343458
afb1_IAA	1.13981469008537			tir1afb1.3_IAA-afb1_IAA -0.078244601 -0.25365474 0.097165537
afb1_IAA	0.979072276735162			tir1afb1.3.4_IAA-afb1_IAA -0.046844587 -0.22417483 0.130485656
afb1_IAA	1.23248298480469			tir1afb1.3.4.5_IAA-afb1_IAA 0.060066016 -0.11726423 0.237396259
afb1_IAA	0.65636040871146			tir1afb1.3.5_IAA-afb1_IAA -0.159456152 -0.33994118 0.021028879
afb1_IAA	0.967175310861584			tir1afb2_IAA-afb1_IAA -0.483547366 -0.65990058 -0.307194156
afb1_IAA	0.674232532333206			tir1afb2.3_IAA-afb1_IAA -0.373494142 -0.55183730 -0.195150988
afb1_IAA	0.856688242143267			tir1afb3_IAA-afb1_IAA -0.399269919 -0.56306268 -0.235477157
afb1_IAA	0.802751773541522			tir1afb3.4.5_IAA_RESP-afb1_IAA -0.106576767 -0.28292998 0.069776443
afb1_IAA	0.829586633785516			WT_IAA-afb1_IAA -0.654330483 -0.82252416 -0.486136803
afb1_IAA	0.876854399543327			afb1comp_IAA-afb1.2.3.4.5_IAA -0.441051301 -0.62226590 -0.259836707
afb1_IAA	0.892912635991523			afb2.3_IAA-afb1.2.3.4.5_IAA -0.352670961 -0.59495020 -0.110391725
afb1_IAA	0.542832411496309			afb4.5_IAA-afb1.2.3.4.5_IAA -0.521046646 -0.69947554 -0.342617753
afb1_IAA	0.343358172028526			tir1_IAA-afb1.2.3.4.5_IAA -0.414431371 -0.59881614 -0.230046601
afb1_IAA	1.2127969740094			tir1afb1_IAA-afb1.2.3.4.5_IAA -0.046436848 -0.23082162 0.137947921
afb1_IAA	1.5914725962994			tir1afb1.2_IAA-afb1.2.3.4.5_IAA -0.171199852 -0.34548647 0.003086764
afb1_IAA	1.05754957180259			tir1afb1.2.4.5_IAA-afb1.2.3.4.5_IAA 0.103467162 -0.09515228 0.302086607
afb1_IAA	0.929297078708033			tir1afb1.3_IAA-afb1.2.3.4.5_IAA -0.059642855 -0.24488991 0.125604202
afb1_IAA	1.02938097098981			tir1afb1.3.4_IAA-afb1.2.3.4.5_IAA -0.028242841 -0.21530906 0.158823380
afb1_IAA	1.44091996089473			tir1afb1.3.4.5_IAA-afb1.2.3.4.5_IAA 0.078667762 -0.10839846 0.265733982
afb1_IAA	0.468142939644239			tir1afb1.3.5_IAA-afb1.2.3.4.5_IAA -0.140854406 -0.33091388 0.049205064
afb1_IAA	1.03439583552845			tir1afb2_IAA-afb1.2.3.4.5_IAA -0.464945619 -0.65108592 -0.278805322
afb1_IAA	0.636941146029921			tir1afb2.3_IAA-afb1.2.3.4.5_IAA -0.354892396 -0.54291909 -0.166865706
afb1_IAA	0.563425365878383			tir1afb3_IAA-afb1.2.3.4.5_IAA -0.380668173 -0.55495479 -0.206381557
afb1_IAA	0.83833597191676			tir1afb3.4.5_IAA_RESP-afb1.2.3.4.5_IAA -0.087975021 -0.27411532 0.098165276
afb1_IAA	0.844257780042173			WT_IAA-afb1.2.3.4.5_IAA -0.635728737 -0.81415763 -0.457299845
afb1_IAA	0.621683153922999			afb2.3_IAA-afb1comp_IAA 0.088380340 -0.14702432 0.323785004
afb1_IAA	0.642382807550573			afb4.5_IAA-afb1comp_IAA -0.079995344 -0.24897166 0.088980976
afb1_IAA	0.670551408363353			tir1_IAA-afb1comp_IAA 0.026619931 -0.14863380 0.201873662
afb1_IAA	0.674445930824212			tir1afb1_IAA-afb1comp_IAA 0.394614453 0.21936072 0.569868184
afb1_IAA	0.713497854678296			tir1afb1.2_IAA-afb1comp_IAA 0.269851449 0.10525512 0.434447778
afb1_IAA	0.56881367777628			tir1afb1.2.4.5_IAA-afb1comp_IAA 0.544518463 0.35434536 0.734691571
afb1_IAA	0.758684985148799			tir1afb1.3_IAA-afb1comp_IAA 0.381408446 0.20524773 0.557569166
afb1_IAA	0.592714308768945			tir1afb1.3.4_IAA-afb1comp_IAA 0.412808460 0.23473573 0.590881192
afb1_IAA	0.645797183406667			tir1afb1.3.4.5_IAA-afb1comp_IAA 0.519719063 0.34164633 0.697791795
tir1afb1_IAA	0.943315431371583			tir1afb1.3.5_IAA-afb1comp_IAA 0.300196895 0.11898230 0.481411490
tir1afb1_IAA	0.610310275785768			tir1afb2_IAA-afb1comp_IAA -0.023894318 -0.20099411 0.153205477
tir1afb1_IAA	1.01844812835662			tir1afb2.3_IAA-afb1comp_IAA 0.086158905 -0.09292254 0.265240348
tir1afb1_IAA	0.891200566173803			tir1afb3_IAA-afb1comp_IAA 0.060383128 -0.10421320 0.224979458
tir1afb1_IAA	1.12366507952861			tir1afb3.4.5_IAA_RESP-afb1comp_IAA 0.353076281 0.17597649 0.530176075
tir1afb1_IAA	0.526448468777575			WT_IAA-afb1comp_IAA -0.194677436 -0.36365376 -0.025701116
tir1afb1_IAA	0.742182187921326			afb4.5_IAA-afb2.3_IAA -0.168375685 -0.40164269 0.064891321
tir1afb1_IAA	1.11197430717616			tir1_IAA-afb2.3_IAA -0.061760409 -0.29961408 0.176093263
tir1afb1_IAA	1.00987489529816			tir1afb1_IAA-afb2.3_IAA 0.306234113 0.06838044 0.544087786
tir1afb1_IAA	1.08417624847146			tir1afb1.2_IAA-afb2.3_IAA 0.181471109 -0.04864289 0.411585104
tir1afb1_IAA	1.0831370687068			tir1afb1.2.4.5_IAA-afb2.3_IAA 0.456138123 0.20708730 0.705188942
tir1afb1_IAA	0.443158210639947			tir1afb1.3_IAA-afb2.3_IAA 0.293028106 0.05450536 0.531550848
tir1afb1_IAA	0.90226783066745			tir1afb1.3.4_IAA-afb2.3_IAA 0.324428120 0.08448980 0.564366440
tir1afb1_IAA	0.781671018978469			tir1afb1.3.4.5_IAA-afb2.3_IAA 0.431338723 0.19140040 0.671277043
tir1afb1_IAA	1.03819254388519			tir1afb1.3.5_IAA-afb2.3_IAA 0.211816555 -0.03046268 0.454095792
tir1afb1_IAA	0.802766368201099			tir1afb2_IAA-afb2.3_IAA -0.112274658 -0.35149179 0.126942474
tir1afb1_IAA	0.676869739712345			tir1afb2.3_IAA-afb2.3_IAA -0.002221435 -0.24290933 0.238466460
tir1afb1_IAA	1.07986365244812			tir1afb3_IAA-afb2.3_IAA -0.027997212 -0.25811121 0.202116784
tir1afb1_IAA	1.10729799823519			tir1afb3.4.5_IAA_RESP-afb2.3_IAA 0.264695940 0.02547881 0.503913073
tir1afb1_IAA	0.959110963794438			WT_IAA-afb2.3_IAA -0.283057776 -0.51632478 -0.049790770
tir1afb1_IAA	1.03013890070906			tir1_IAA-afb4.5_IAA 0.106615275 -0.06575645 0.278986998
tir1afb1_IAA	0.895772957138313			tir1afb1_IAA-afb4.5_IAA 0.474609798 0.30223808 0.646981520
tir1afb1_IAA	1.00701715094534			tir1afb1.2_IAA-afb4.5_IAA 0.349846793 0.18832252 0.511371070
tir1afb1_IAA	1.19152351816101			tir1afb1.2.4.5_IAA-afb4.5_IAA 0.624513808 0.43699327 0.812034344
tir1afb1_IAA	1.28567320483935			tir1afb1.3_IAA-afb4.5_IAA 0.461403791 0.28811000 0.634697586
tir1afb1_IAA	1.15499634943316			tir1afb1.3.4_IAA-afb4.5_IAA 0.492803805 0.31756671 0.668040897
tir1afb1_IAA	1.26062897251101			tir1afb1.3.4.5_IAA-afb4.5_IAA 0.599714408 0.42447732 0.774951499
tir1afb1_IAA	1.19058825637281			tir1afb1.3.5_IAA-afb4.5_IAA 0.380192240 0.20176335 0.558621132
tir1afb1_IAA	0.928818873654553			tir1afb2_IAA-afb4.5_IAA 0.056101026 -0.11814730 0.230349348
tir1afb1_IAA	0.651098081548736			tir1afb2.3_IAA-afb4.5_IAA 0.166154250 -0.01010778 0.342416281
tir1afb1_IAA	1.36839191410642			tir1afb3_IAA-afb4.5_IAA 0.140378473 -0.02114580 0.301902750
tir1afb1_IAA	0.93770386064241			tir1afb3.4.5_IAA_RESP-afb4.5_IAA 0.433071625 0.25882330 0.607319947
tir1afb1_IAA	1.06780916717804			WT_IAA-afb4.5_IAA -0.114682091 -0.28066744 0.051303261
tir1afb1_IAA	0.637173072702269			tir1afb1_IAA-tir1_IAA 0.367994523 0.18946474 0.546524308
tir1afb1_IAA	1.07809704684819			tir1afb1.2_IAA-tir1_IAA 0.243231518 0.07515128 0.411311754
tir1afb1_IAA	0.724723967875011			tir1afb1.2.4.5_IAA-tir1_IAA 0.517898533 0.32470219 0.711094871
tir1afb1_IAA	0.820120670270948			tir1afb1.3_IAA-tir1_IAA 0.354788516 0.17536830 0.534208729
tir1afb1_IAA	0.986701186546205			tir1afb1.3.4_IAA-tir1_IAA 0.386188530 0.20489068 0.567486384
tir1afb1_IAA	0.500261138708103			tir1afb1.3.4.5_IAA-tir1_IAA 0.493099132 0.31180128 0.674396986
tir1afb1_IAA	0.956980645276884			tir1afb1.3.5_IAA-tir1_IAA 0.273576965 0.08919220 0.457961734
tir1afb1_IAA	0.579082923857686			tir1afb2_IAA-tir1_IAA -0.050514249 -0.23085657 0.129828068
tir1afb1_IAA	0.869481709092375			tir1afb2.3_IAA-tir1_IAA 0.059538975 -0.12274974 0.241827694
tir1afb1_IAA	0.56162470381137			tir1afb3_IAA-tir1_IAA 0.033763198 -0.13431704 0.201843433
tir1afb1_IAA	0.582408299104602			tir1afb3.4.5_IAA_RESP-tir1_IAA 0.326456350 0.14611403 0.506798667
tir1afb1_IAA	0.591864834963023			WT_IAA-tir1_IAA -0.221297367 -0.39366909 -0.048925644
tir1afb1_IAA	0.562404088634866			tir1afb1.2_IAA-tir1afb1_IAA -0.124763004 -0.29284324 0.043317231
tir1afb1_IAA	1.03133395743842			tir1afb1.2.4.5_IAA-tir1afb1_IAA 0.149904010 -0.04329233 0.343100348
tir1afb1_IAA	0.671258168983172			tir1afb1.3_IAA-tir1afb1_IAA -0.013206007 -0.19262622 0.166214207
tir1afb1_IAA	0.55757190272919			tir1afb1.3.4_IAA-tir1afb1_IAA 0.018194007 -0.16310385 0.199491861
tir1afb1_IAA	0.492519249461373			tir1afb1.3.4.5_IAA-tir1afb1_IAA 0.125104610 -0.05619324 0.306402464
tir1afb1_IAA	0.505041365625545			tir1afb1.3.5_IAA-tir1afb1_IAA -0.094417558 -0.27880233 0.089967212
tir1afb1.2_IAA	1.06774786388921			tir1afb2_IAA-tir1afb1_IAA -0.418508771 -0.59885109 -0.238166454
tir1afb1.2_IAA	0.972487040640846			tir1afb2.3_IAA-tir1afb1_IAA -0.308455548 -0.49074427 -0.126166829
tir1afb1.2_IAA	0.871420030851516			tir1afb3_IAA-tir1afb1_IAA -0.334231325 -0.50231156 -0.166151089
tir1afb1.2_IAA	0.395755579228614			tir1afb3.4.5_IAA_RESP-tir1afb1_IAA -0.041538173 -0.22188049 0.138804144
tir1afb1.2_IAA	1.10883401441214			WT_IAA-tir1afb1_IAA -0.589291889 -0.76166361 -0.416920166
tir1afb1.2_IAA	0.519112440738763			tir1afb1.2.4.5_IAA-tir1afb1.2_IAA 0.274667014 0.09108350 0.458250527
tir1afb1.2_IAA	0.58681848040289			tir1afb1.3_IAA-tir1afb1.2_IAA 0.111556997 -0.05746872 0.280582719
tir1afb1.2_IAA	1.07763806299712			tir1afb1.3.4_IAA-tir1afb1.2_IAA 0.142957011 -0.02806051 0.313974534
tir1afb1.2_IAA	1.15336451288309			tir1afb1.3.4.5_IAA-tir1afb1.2_IAA 0.249867614 0.07885009 0.420885137
tir1afb1.2_IAA	0.798842699089462			tir1afb1.3.5_IAA-tir1afb1.2_IAA 0.030345446 -0.14394117 0.204632062
tir1afb1.2_IAA	0.537662714687438			tir1afb2_IAA-tir1afb1.2_IAA -0.293745767 -0.46374998 -0.123741554
tir1afb1.2_IAA	0.671795464777851			tir1afb2.3_IAA-tir1afb1.2_IAA -0.183692544 -0.35576014 -0.011624945
tir1afb1.2_IAA	1.0315822104349			tir1afb3_IAA-tir1afb1.2_IAA -0.209468321 -0.36640476 -0.052531878
tir1afb1.2_IAA	0.80740436398885			tir1afb3.4.5_IAA_RESP-tir1afb1.2_IAA 0.083224832 -0.08677938 0.253229045
tir1afb1.2_IAA	0.917033038677567			WT_IAA-tir1afb1.2_IAA -0.464528885 -0.62605316 -0.303004608
tir1afb1.2_IAA	0.60581159908774			tir1afb1.3_IAA-tir1afb1.2.4.5_IAA -0.163110017 -0.35712948 0.030909451
tir1afb1.2_IAA	0.54858621817976			tir1afb1.3.4_IAA-tir1afb1.2.4.5_IAA -0.131710003 -0.32746713 0.064047124
tir1afb1.2_IAA	0.906109535185245			tir1afb1.3.4.5_IAA-tir1afb1.2.4.5_IAA -0.024799400 -0.22055653 0.170957726
tir1afb1.2_IAA	0.190669261408788			tir1afb1.3.5_IAA-tir1afb1.2.4.5_IAA -0.244321568 -0.44294101 -0.045702123
tir1afb1.2_IAA	0.971847376021926			tir1afb2_IAA-tir1afb1.2.4.5_IAA -0.568412781 -0.76328528 -0.373540280
tir1afb1.2_IAA	0.89149565889146			tir1afb2.3_IAA-tir1afb1.2.4.5_IAA -0.458359558 -0.65503472 -0.261684400
tir1afb1.2_IAA	0.58071706403781			tir1afb3_IAA-tir1afb1.2.4.5_IAA -0.484135335 -0.66771885 -0.300551822
tir1afb1.2_IAA	0.857888663912828			tir1afb3.4.5_IAA_RESP-tir1afb1.2.4.5_IAA -0.191442183 -0.38631468 0.003430319
tir1afb1.2_IAA	1.08880759134288			WT_IAA-tir1afb1.2.4.5_IAA -0.739195899 -0.92671644 -0.551675363
tir1afb1.2_IAA	0.362640633956842			tir1afb1.3.4_IAA-tir1afb1.3_IAA 0.031400014 -0.15077474 0.213574767
tir1afb1.2_IAA	0.725232062942998			tir1afb1.3.4.5_IAA-tir1afb1.3_IAA 0.138310617 -0.04386414 0.320485370
tir1afb1.2_IAA	0.751409107348025			tir1afb1.3.5_IAA-tir1afb1.3_IAA -0.081211551 -0.26645861 0.104035506
tir1afb1.2_IAA	0.92234717551167			tir1afb2_IAA-tir1afb1.3_IAA -0.405302765 -0.58652660 -0.224078925
tir1afb1.2_IAA	0.824232463963511			tir1afb2.3_IAA-tir1afb1.3_IAA -0.295249541 -0.47841042 -0.112088666
tir1afb1.2_IAA	0.941143474313776			tir1afb3_IAA-tir1afb1.3_IAA -0.321025318 -0.49005104 -0.151999597
tir1afb1.2_IAA	1.05741482004512			tir1afb3.4.5_IAA_RESP-tir1afb1.3_IAA -0.028332166 -0.20955601 0.152891674
tir1afb1.2_IAA	1.19169518504759			WT_IAA-tir1afb1.3_IAA -0.576085882 -0.74937968 -0.402792087
tir1afb1.2_IAA	0.52693603107786			tir1afb1.3.4.5_IAA-tir1afb1.3.4_IAA 0.106910603 -0.07711369 0.290934893
tir1afb1.2_IAA	0.280074693145502			tir1afb1.3.5_IAA-tir1afb1.3.4_IAA -0.112611565 -0.29967779 0.074454655
tir1afb1.2_IAA	0.63459650693913			tir1afb2_IAA-tir1afb1.3.4_IAA -0.436702779 -0.61978576 -0.253619795
tir1afb1.2_IAA	0.913441075817479			tir1afb2.3_IAA-tir1afb1.3.4_IAA -0.326649555 -0.51165011 -0.141649001
tir1afb1.2_IAA	0.417947021008063			tir1afb3_IAA-tir1afb1.3.4_IAA -0.352425332 -0.52344286 -0.181407809
tir1afb1.2_IAA	0.92603754831313			tir1afb3.4.5_IAA_RESP-tir1afb1.3.4_IAA -0.059732180 -0.24281516 0.123350804
tir1afb1.2_IAA	0.907388864423085			WT_IAA-tir1afb1.3.4_IAA -0.607485896 -0.78272299 -0.432248804
tir1afb1.2_IAA	0.519456875533566			tir1afb1.3.5_IAA-tir1afb1.3.4.5_IAA -0.219522168 -0.40658839 -0.032455947
tir1afb1.2_IAA	0.892430553334497			tir1afb2_IAA-tir1afb1.3.4.5_IAA -0.543613381 -0.72669636 -0.360530398
tir1afb1.2_IAA	1.02922037184196			tir1afb2.3_IAA-tir1afb1.3.4.5_IAA -0.433560158 -0.61856071 -0.248559604
tir1afb1.2_IAA	1.09968188986451			tir1afb3_IAA-tir1afb1.3.4.5_IAA -0.459335935 -0.63035346 -0.288318412
tir1afb1.2_IAA	0.287012594012248			tir1afb3.4.5_IAA_RESP-tir1afb1.3.4.5_IAA -0.166642783 -0.34972577 0.016440201
tir1afb1.2_IAA	0.795349146170746			WT_IAA-tir1afb1.3.4.5_IAA -0.714396499 -0.88963359 -0.539159407
tir1afb1.2_IAA	0.574615647672729			tir1afb2_IAA-tir1afb1.3.5_IAA -0.324091214 -0.51023151 -0.137950916
tir1afb1.2_IAA	0.72011474599164			tir1afb2.3_IAA-tir1afb1.3.5_IAA -0.214037990 -0.40206468 -0.026011300
tir1afb1.2_IAA	0.879145211249239			tir1afb3_IAA-tir1afb1.3.5_IAA -0.239813767 -0.41410038 -0.065527151
tir1afb1.2_IAA	0.821673805487831			tir1afb3.4.5_IAA_RESP-tir1afb1.3.5_IAA 0.052879385 -0.13326091 0.239019682
tir1afb1.2_IAA	0.934845238065949			WT_IAA-tir1afb1.3.5_IAA -0.494874331 -0.67330322 -0.316445439
tir1afb1.2_IAA	0.414945517796209			tir1afb2.3_IAA-tir1afb2_IAA 0.110053224 -0.07401102 0.294117463
tir1afb1.2_IAA	0.564725448564813			tir1afb3_IAA-tir1afb2_IAA 0.084277447 -0.08572677 0.254281660
tir1afb1.2_IAA	0.466512327075282			tir1afb3.4.5_IAA_RESP-tir1afb2_IAA 0.376970599 0.19483379 0.559107411
tir1afb1.2_IAA	0.439301978285847			WT_IAA-tir1afb2_IAA -0.170783118 -0.34503144 0.003465204
tir1afb1.2_IAA	0.543714926081832			tir1afb3_IAA-tir1afb2.3_IAA -0.025775777 -0.19784338 0.146291822
tir1afb1.2_IAA	0.667514632328158			tir1afb3.4.5_IAA_RESP-tir1afb2.3_IAA 0.266917375 0.08285314 0.450981615
tir1afb1.2_IAA	0.613438369544092			WT_IAA-tir1afb2.3_IAA -0.280836341 -0.45709837 -0.104574310
tir1afb1.2_IAA	0.876881782597678			tir1afb3.4.5_IAA_RESP-tir1afb3_IAA 0.292693152 0.12268894 0.462697366
tir1afb1.2_IAA	0.804452065747681			WT_IAA-tir1afb3_IAA -0.255060564 -0.41658484 -0.093536287
tir1afb1.2_IAA	0.857544229118025			WT_IAA-tir1afb3.4.5_IAA_RESP -0.547753716 -0.72200204 -0.373505394
tir1afb1.2_IAA	0.554884454427586			p adj
tir1afb1.2_IAA	0.599611772781287			afb1.2.3.4.5_IAA-afb1_IAA 1.0000000							WT_IAA-afb1_IAA 0.0000000
tir1afb1.2_IAA	0.80140135756514			afb1comp_IAA-afb1_IAA 0.0000000							WT_IAA-afb1.2.3.4.5_IAA 0.0000000
tir1afb1.2_IAA	0.756575629270069			afb2.3_IAA-afb1_IAA 0.0000063							WT_IAA-afb1comp_IAA 0.0075377
tir1afb1.2_IAA	0.414059828323857			afb4.5_IAA-afb1_IAA 0.0000000							WT_IAA-afb2.3_IAA 0.0031723
tir1afb1.2_IAA	1.03128698061078			tir1_IAA-afb1_IAA 0.0000000							WT_IAA-afb4.5_IAA 0.5945697
tir1afb1.3_IAA	1.49033439086427			tir1afb1_IAA-afb1_IAA 0.9981136							WT_IAA-tir1_IAA 0.0011003
tir1afb1.3_IAA	0.867961006255018			tir1afb1.2_IAA-afb1_IAA 0.0068773							WT_IAA-tir1afb1_IAA 0.0000000
tir1afb1.3_IAA	0.954671553815603			tir1afb1.2.4.5_IAA-afb1_IAA 0.9849868							WT_IAA-tir1afb1.2_IAA 0.0000000
tir1afb1.3_IAA	0.287005370132335			tir1afb1.3_IAA-afb1_IAA 0.9856093							WT_IAA-tir1afb1.2.4.5_IAA 0.0000000
tir1afb1.3_IAA	0.935296300878386			tir1afb1.3.4_IAA-afb1_IAA 0.9999812							WT_IAA-tir1afb1.3_IAA 0.0000000
tir1afb1.3_IAA	0.899514989609915			tir1afb1.3.4.5_IAA-afb1_IAA 0.9994313							WT_IAA-tir1afb1.3.4_IAA 0.0000000
tir1afb1.3_IAA	0.743909062124525			tir1afb1.3.5_IAA-afb1_IAA 0.1614323							WT_IAA-tir1afb1.3.4.5_IAA 0.0000000
tir1afb1.3_IAA	0.758906011151255			tir1afb2_IAA-afb1_IAA 0.0000000							WT_IAA-tir1afb1.3.5_IAA 0.0000000
tir1afb1.3_IAA	0.789403162527758			tir1afb2.3_IAA-afb1_IAA 0.0000000							WT_IAA-tir1afb2_IAA 0.0621969
tir1afb1.3_IAA	0.849894211957718			tir1afb3_IAA-afb1_IAA 0.0000000							WT_IAA-tir1afb2.3_IAA 0.0000049
tir1afb1.3_IAA	0.566361289754391			tir1afb3.4.5_IAA_RESP-afb1_IAA 0.8072774							WT_IAA-tir1afb3_IAA 0.0000065
tir1afb1.3_IAA	1.10373518810141			WT_IAA-afb1_IAA 0.0000000							WT_IAA-tir1afb3.4.5_IAA_RESP 0.0000000
tir1afb1.3_IAA	1.14922928850464			afb1comp_IAA-afb1.2.3.4.5_IAA 0.0000000
tir1afb1.3_IAA	0.895690264354777			afb2.3_IAA-afb1.2.3.4.5_IAA 0.0000631							afb1.2.3.4.5_IAA-afb1_IAA 1.0000000
tir1afb1.3_IAA	0.766505136329228			afb4.5_IAA-afb1.2.3.4.5_IAA 0.0000000							afb1comp_IAA-afb1_IAA 0.0000000
tir1afb1.3_IAA	1.18526222643464			tir1_IAA-afb1.2.3.4.5_IAA 0.0000000							afb2.3_IAA-afb1_IAA 0.0000063
tir1afb1.3_IAA	0.945210391342365			tir1afb1_IAA-afb1.2.3.4.5_IAA 0.9999906							afb4.5_IAA-afb1_IAA 0.0000000
tir1afb1.3_IAA	1.31409507713406			tir1afb1.2_IAA-afb1.2.3.4.5_IAA 0.0607505							tir1_IAA-afb1_IAA 0.0000000
tir1afb1.3_IAA	0.437226487061146			tir1afb1.2.4.5_IAA-afb1.2.3.4.5_IAA 0.9371778							tir1afb1_IAA-afb1_IAA 0.9981136
tir1afb1.3_IAA	1.18893597569287			tir1afb1.3_IAA-afb1.2.3.4.5_IAA 0.9997073							tir1afb1.2_IAA-afb1_IAA 0.0068773
tir1afb1.3_IAA	1.18209173049946			tir1afb1.3.4_IAA-afb1.2.3.4.5_IAA 1.0000000							tir1afb1.2.4.5_IAA-afb1_IAA 0.9849868
tir1afb1.3_IAA	0.355347171401792			tir1afb1.3.4.5_IAA-afb1.2.3.4.5_IAA 0.9923476							tir1afb1.3_IAA-afb1_IAA 0.9856093
tir1afb1.3_IAA	0.598871454423071			tir1afb1.3.5_IAA-afb1.2.3.4.5_IAA 0.4596953							tir1afb1.3.4_IAA-afb1_IAA 0.9999812
tir1afb1.3_IAA	0.775714672140945			tir1afb2_IAA-afb1.2.3.4.5_IAA 0.0000000							tir1afb1.3.4.5_IAA-afb1_IAA 0.9994313
tir1afb1.3_IAA	0.747683462047361			tir1afb2.3_IAA-afb1.2.3.4.5_IAA 0.0000000							tir1afb1.3.5_IAA-afb1_IAA 0.1614323
tir1afb1.3_IAA	1.10348356143989			tir1afb3_IAA-afb1.2.3.4.5_IAA 0.0000000							tir1afb2_IAA-afb1_IAA 0.0000000
tir1afb1.3_IAA	0.67964361277173			tir1afb3.4.5_IAA_RESP-afb1.2.3.4.5_IAA 0.9742252							tir1afb2.3_IAA-afb1_IAA 0.0000000
tir1afb1.3_IAA	1.12995468623204			WT_IAA-afb1.2.3.4.5_IAA 0.0000000							tir1afb3_IAA-afb1_IAA 0.0000000
tir1afb1.3_IAA	1.13201802485652			afb2.3_IAA-afb1comp_IAA 0.9979396							tir1afb3.4.5_IAA_RESP-afb1_IAA 0.8072774
tir1afb1.3_IAA	1.17902188522889			afb4.5_IAA-afb1comp_IAA 0.9738058							WT_IAA-afb1_IAA 0.0000000
tir1afb1.3_IAA	0.551314015395357			tir1_IAA-afb1comp_IAA 1.0000000
tir1afb1.3_IAA	1.26563178212486			tir1afb1_IAA-afb1comp_IAA 0.0000000							afb1comp_IAA-afb1.2.3.4.5_IAA 0.0000000
tir1afb1.3_IAA	1.27705563255797			tir1afb1.2_IAA-afb1comp_IAA 0.0000020							afb2.3_IAA-afb1.2.3.4.5_IAA 0.0000631
tir1afb1.3_IAA	0.905000450831102			tir1afb1.2.4.5_IAA-afb1comp_IAA 0.0000000							afb4.5_IAA-afb1.2.3.4.5_IAA 0.0000000
tir1afb1.3_IAA	0.550710111407704			tir1afb1.3_IAA-afb1comp_IAA 0.0000000							tir1_IAA-afb1.2.3.4.5_IAA 0.0000000
tir1afb1.3_IAA	0.846270788031797			tir1afb1.3.4_IAA-afb1comp_IAA 0.0000000							tir1afb1_IAA-afb1.2.3.4.5_IAA 0.9999906
tir1afb1.3_IAA	0.540645044946812			tir1afb1.3.4.5_IAA-afb1comp_IAA 0.0000000							tir1afb1.2_IAA-afb1.2.3.4.5_IAA 0.0607505
tir1afb1.3_IAA	0.649398088056749			tir1afb1.3.5_IAA-afb1comp_IAA 0.0000014							tir1afb1.2.4.5_IAA-afb1.2.3.4.5_IAA 0.9371778
tir1afb1.3_IAA	0.439843404340979			tir1afb2_IAA-afb1comp_IAA 1.0000000							tir1afb1.3_IAA-afb1.2.3.4.5_IAA 0.9997073
tir1afb1.3_IAA	0.762177157751045			tir1afb2.3_IAA-afb1comp_IAA 0.9694000							tir1afb1.3.4_IAA-afb1.2.3.4.5_IAA 1.0000000
tir1afb1.3_IAA	0.923520173119143			tir1afb3_IAA-afb1comp_IAA 0.9984456							tir1afb1.3.4.5_IAA-afb1.2.3.4.5_IAA 0.9923476
tir1afb1.3_IAA	0.413020002222702			tir1afb3.4.5_IAA_RESP-afb1comp_IAA 0.0000000							tir1afb1.3.5_IAA-afb1.2.3.4.5_IAA 0.4596953
tir1afb1.3_IAA	1.14178113932359			WT_IAA-afb1comp_IAA 0.0075377							tir1afb2_IAA-afb1.2.3.4.5_IAA 0.0000000
tir1afb1.3_IAA	0.680146866094774			afb4.5_IAA-afb2.3_IAA 0.5110809							tir1afb2.3_IAA-afb1.2.3.4.5_IAA 0.0000000
tir1afb1.3_IAA	0.642503517531039			tir1_IAA-afb2.3_IAA 0.9999853							tir1afb3_IAA-afb1.2.3.4.5_IAA 0.0000000
tir1afb1.3_IAA	0.838571012189215			tir1afb1_IAA-afb2.3_IAA 0.0010396							tir1afb3.4.5_IAA_RESP-afb1.2.3.4.5_IAA 0.9742252
tir1afb1.3_IAA	0.96488759627341			tir1afb1.2_IAA-afb2.3_IAA 0.3411436							WT_IAA-afb1.2.3.4.5_IAA 0.0000000
tir1afb1.3_IAA	0.834997913595599			tir1afb1.2.4.5_IAA-afb2.3_IAA 0.0000000
tir1afb1.3_IAA	0.705158556250091			tir1afb1.3_IAA-afb2.3_IAA 0.0025438							afb2.3_IAA-afb1comp_IAA 0.9979396
tir1afb1.3_IAA	1.1340310381487			tir1afb1.3.4_IAA-afb2.3_IAA 0.0003695							afb4.5_IAA-afb1comp_IAA 0.9738058
tir1afb1.3.5_IAA	0.867485202246629			tir1afb1.3.4.5_IAA-afb2.3_IAA 0.0000001							tir1_IAA-afb1comp_IAA 1.0000000
tir1afb1.3.5_IAA	0.958652395042707			tir1afb1.3.5_IAA-afb2.3_IAA 0.1750963							tir1afb1_IAA-afb1comp_IAA 0.0000000
tir1afb1.3.5_IAA	1.15706504728183			tir1afb2_IAA-afb2.3_IAA 0.9759260							tir1afb1.2_IAA-afb1comp_IAA 0.0000020
tir1afb1.3.5_IAA	1.07313877598988			tir1afb2.3_IAA-afb2.3_IAA 1.0000000							tir1afb1.2.4.5_IAA-afb1comp_IAA 0.0000000
tir1afb1.3.5_IAA	0.782133552705834			tir1afb3_IAA-afb2.3_IAA 1.0000000							tir1afb1.3_IAA-afb1comp_IAA 0.0000000
tir1afb1.3.5_IAA	0.800264364031133			tir1afb3.4.5_IAA_RESP-afb2.3_IAA 0.0138240							tir1afb1.3.4_IAA-afb1comp_IAA 0.0000000
tir1afb1.3.5_IAA	0.732701435035914			WT_IAA-afb2.3_IAA 0.0031723							tir1afb1.3.4.5_IAA-afb1comp_IAA 0.0000000
tir1afb1.3.5_IAA	0.640222894250896			tir1_IAA-afb4.5_IAA 0.7766843							tir1afb1.3.5_IAA-afb1comp_IAA 0.0000014
tir1afb1.3.5_IAA	0.595294971847324			tir1afb1_IAA-afb4.5_IAA 0.0000000							tir1afb2_IAA-afb1comp_IAA 1.0000000
tir1afb1.3.5_IAA	0.620495659286893			tir1afb1.2_IAA-afb4.5_IAA 0.0000000							tir1afb2.3_IAA-afb1comp_IAA 0.9694000
tir1afb1.3.5_IAA	0.761494075662569			tir1afb1.2.4.5_IAA-afb4.5_IAA 0.0000000							tir1afb3_IAA-afb1comp_IAA 0.9984456
tir1afb1.3.5_IAA	1.17753347893524			tir1afb1.3_IAA-afb4.5_IAA 0.0000000							tir1afb3.4.5_IAA_RESP-afb1comp_IAA 0.0000000
tir1afb1.3.5_IAA	0.661660583113516			tir1afb1.3.4_IAA-afb4.5_IAA 0.0000000							WT_IAA-afb1comp_IAA 0.0075377
tir1afb1.3.5_IAA	0.682870211456318			tir1afb1.3.4.5_IAA-afb4.5_IAA 0.0000000
tir1afb1.3.5_IAA	0.828315807968388			tir1afb1.3.5_IAA-afb4.5_IAA 0.0000000							afb4.5_IAA-afb2.3_IAA 0.5110809
tir1afb1.3.5_IAA	0.896676948782959			tir1afb2_IAA-afb4.5_IAA 0.9997074							tir1_IAA-afb2.3_IAA 0.9999853
tir1afb1.3.5_IAA	0.926837952528505			tir1afb2.3_IAA-afb4.5_IAA 0.0919821							tir1afb1_IAA-afb2.3_IAA 0.0010396
tir1afb1.3.5_IAA	1.00015940964905			tir1afb3_IAA-afb4.5_IAA 0.1831312							tir1afb1.2_IAA-afb2.3_IAA 0.3411436
tir1afb1.3.5_IAA	0.762178257222013			tir1afb3.4.5_IAA_RESP-afb4.5_IAA 0.0000000							tir1afb1.2.4.5_IAA-afb2.3_IAA 0.0000000
tir1afb1.3.5_IAA	1.11373354851697			WT_IAA-afb4.5_IAA 0.5945697							tir1afb1.3_IAA-afb2.3_IAA 0.0025438
tir1afb1.3.5_IAA	0.365752058653441			tir1afb1_IAA-tir1_IAA 0.0000000							tir1afb1.3.4_IAA-afb2.3_IAA 0.0003695
tir1afb1.3.5_IAA	0.740455492709626			tir1afb1.2_IAA-tir1_IAA 0.0000734							tir1afb1.3.4.5_IAA-afb2.3_IAA 0.0000001
tir1afb1.3.5_IAA	0.627850611050928			tir1afb1.2.4.5_IAA-tir1_IAA 0.0000000							tir1afb1.3.5_IAA-afb2.3_IAA 0.1750963
tir1afb1.3.5_IAA	0.96110404563072			tir1afb1.3_IAA-tir1_IAA 0.0000000							tir1afb2_IAA-afb2.3_IAA 0.9759260
tir1afb1.3.5_IAA	0.770160375415542			tir1afb1.3.4_IAA-tir1_IAA 0.0000000							tir1afb2.3_IAA-afb2.3_IAA 1.0000000
tir1afb1.3.5_IAA	0.545520763397683			tir1afb1.3.4.5_IAA-tir1_IAA 0.0000000							tir1afb3_IAA-afb2.3_IAA 1.0000000
tir1afb1.3.5_IAA	0.645468286206643			tir1afb1.3.5_IAA-tir1_IAA 0.0000382							tir1afb3.4.5_IAA_RESP-afb2.3_IAA 0.0138240
tir1afb1.3.5_IAA	1.1035848553852			tir1afb2_IAA-tir1_IAA 0.9999566							WT_IAA-afb2.3_IAA 0.0031723
tir1afb1.3.5_IAA	0.607496209657432			tir1afb2.3_IAA-tir1_IAA 0.9996462
tir1afb1.3.5_IAA	0.546946141646528			tir1afb3_IAA-tir1_IAA 0.9999997							tir1_IAA-afb4.5_IAA 0.7766843
tir1afb1.3.5_IAA	0.792225230707652			tir1afb3.4.5_IAA_RESP-tir1_IAA 0.0000001							tir1afb1_IAA-afb4.5_IAA 0.0000000
tir1afb1.3.5_IAA	0.517811410240151			WT_IAA-tir1_IAA 0.0011003							tir1afb1.2_IAA-afb4.5_IAA 0.0000000
tir1afb1.3.5_IAA	0.509772276916668			tir1afb1.2_IAA-tir1afb1_IAA 0.4566069							tir1afb1.2.4.5_IAA-afb4.5_IAA 0.0000000
tir1afb1.3.5_IAA	0.837780319540714			tir1afb1.2.4.5_IAA-tir1afb1_IAA 0.3713616							tir1afb1.3_IAA-afb4.5_IAA 0.0000000
tir1afb1.3.5_IAA	0.78344490069477			tir1afb1.3_IAA-tir1afb1_IAA 1.0000000							tir1afb1.3.4_IAA-afb4.5_IAA 0.0000000
tir1afb1.3.5_IAA	0.814632176779483			tir1afb1.3.4_IAA-tir1afb1_IAA 1.0000000							tir1afb1.3.4.5_IAA-afb4.5_IAA 0.0000000
tir1afb1.3.5_IAA	0.972336026231614			tir1afb1.3.4.5_IAA-tir1afb1_IAA 0.5969040							tir1afb1.3.5_IAA-afb4.5_IAA 0.0000000
tir1afb1.3.5_IAA	0.672151367025008			tir1afb1.3.5_IAA-tir1afb1_IAA 0.9458497							tir1afb2_IAA-afb4.5_IAA 0.9997074
tir1afb1.3.5_IAA	0.825807142250422			tir1afb2_IAA-tir1afb1_IAA 0.0000000							tir1afb2.3_IAA-afb4.5_IAA 0.0919821
tir1afb1.3.5_IAA	0.830938503946262			tir1afb2.3_IAA-tir1afb1_IAA 0.0000007							tir1afb3_IAA-afb4.5_IAA 0.1831312
tir1afb1.3.5_IAA	0.632468836577183			tir1afb3_IAA-tir1afb1_IAA 0.0000000							tir1afb3.4.5_IAA_RESP-afb4.5_IAA 0.0000000
tir1afb1.3.5_IAA	0.740797583489349			tir1afb3.4.5_IAA_RESP-tir1afb1_IAA 0.9999975							WT_IAA-afb4.5_IAA 0.5945697
tir1afb1.3.5_IAA	0.697979220894067			WT_IAA-tir1afb1_IAA 0.0000000
tir1afb1.3.5_IAA	0.646893664455487			tir1afb1.2.4.5_IAA-tir1afb1.2_IAA 0.0000305							tir1afb1_IAA-tir1_IAA 0.0000000
tir1afb1.3.5_IAA	0.888865875979293			tir1afb1.3_IAA-tir1afb1.2_IAA 0.6763245							tir1afb1.2_IAA-tir1_IAA 0.0000734
tir1afb1.3.4_IAA	1.29885344435536			tir1afb1.3.4_IAA-tir1afb1.2_IAA 0.2407787							tir1afb1.2.4.5_IAA-tir1_IAA 0.0000000
tir1afb1.3.4_IAA	1.18875386209451			tir1afb1.3.4.5_IAA-tir1afb1.2_IAA 0.0000574							tir1afb1.3_IAA-tir1_IAA 0.0000000
tir1afb1.3.4_IAA	0.85029959070003			tir1afb1.3.5_IAA-tir1afb1.2_IAA 1.0000000							tir1afb1.3.4_IAA-tir1_IAA 0.0000000
tir1afb1.3.4_IAA	0.48393274915491			tir1afb2_IAA-tir1afb1.2_IAA 0.0000003							tir1afb1.3.4.5_IAA-tir1_IAA 0.0000000
tir1afb1.3.4_IAA	1.38310805425452			tir1afb2.3_IAA-tir1afb1.2_IAA 0.0226133							tir1afb1.3.5_IAA-tir1_IAA 0.0000382
tir1afb1.3.4_IAA	0.622806400645129			tir1afb3_IAA-tir1afb1.2_IAA 0.0004908							tir1afb2_IAA-tir1_IAA 0.9999566
tir1afb1.3.4_IAA	1.03098466414429			tir1afb3.4.5_IAA_RESP-tir1afb1.2_IAA 0.9639536							tir1afb2.3_IAA-tir1_IAA 0.9996462
tir1afb1.3.4_IAA	0.560548733889381			WT_IAA-tir1afb1.2_IAA 0.0000000							tir1afb3_IAA-tir1_IAA 0.9999997
tir1afb1.3.4_IAA	0.566119761265127			tir1afb1.3_IAA-tir1afb1.2.4.5_IAA 0.2318272							tir1afb3.4.5_IAA_RESP-tir1_IAA 0.0000001
tir1afb1.3.4_IAA	0.830083078985986			tir1afb1.3.4_IAA-tir1afb1.2.4.5_IAA 0.6428768							WT_IAA-tir1_IAA 0.0011003
tir1afb1.3.4_IAA	1.08106647725408			tir1afb1.3.4.5_IAA-tir1afb1.2.4.5_IAA 1.0000000
tir1afb1.3.4_IAA	1.01938314321748			tir1afb1.3.5_IAA-tir1afb1.2.4.5_IAA 0.0024849							tir1afb1.2_IAA-tir1afb1_IAA 0.4566069
tir1afb1.3.4_IAA	1.05780600212855			tir1afb2_IAA-tir1afb1.2.4.5_IAA 0.0000000							tir1afb1.2.4.5_IAA-tir1afb1_IAA 0.3713616
tir1afb1.3.4_IAA	1.40969965915111			tir1afb2.3_IAA-tir1afb1.2.4.5_IAA 0.0000000							tir1afb1.3_IAA-tir1afb1_IAA 1.0000000
tir1afb1.3.4_IAA	0.879245959745137			tir1afb3_IAA-tir1afb1.2.4.5_IAA 0.0000000							tir1afb1.3.4_IAA-tir1afb1_IAA 1.0000000
tir1afb1.3.4_IAA	1.70019714849665			tir1afb3.4.5_IAA_RESP-tir1afb1.2.4.5_IAA 0.0606794							tir1afb1.3.4.5_IAA-tir1afb1_IAA 0.5969040
tir1afb1.3.4_IAA	1.17743950752727			WT_IAA-tir1afb1.2.4.5_IAA 0.0000000							tir1afb1.3.5_IAA-tir1afb1_IAA 0.9458497
tir1afb1.3.4_IAA	0.961088372223862			tir1afb1.3.4_IAA-tir1afb1.3_IAA 1.0000000							tir1afb2_IAA-tir1afb1_IAA 0.0000000
tir1afb1.3.4_IAA	0.405249166631504			tir1afb1.3.4.5_IAA-tir1afb1.3_IAA 0.4128449							tir1afb2.3_IAA-tir1afb1_IAA 0.0000007
tir1afb1.3.4_IAA	0.807167203491943			tir1afb1.3.5_IAA-tir1afb1.3_IAA 0.9880044							tir1afb3_IAA-tir1afb1_IAA 0.0000000
tir1afb1.3.4_IAA	0.5637075638447			tir1afb2_IAA-tir1afb1.3_IAA 0.0000000							tir1afb3.4.5_IAA_RESP-tir1afb1_IAA 0.9999975
tir1afb1.3.4_IAA	0.897165140582584			tir1afb2.3_IAA-tir1afb1.3_IAA 0.0000034							WT_IAA-tir1afb1_IAA 0.0000000
tir1afb1.3.4_IAA	0.60230272257151			tir1afb3_IAA-tir1afb1.3_IAA 0.0000000
tir1afb1.3.4_IAA	1.41906128247324			tir1afb3.4.5_IAA_RESP-tir1afb1.3_IAA 1.0000000							tir1afb1.2.4.5_IAA-tir1afb1.2_IAA 0.0000305
tir1afb1.3.4_IAA	0.366251975001289			WT_IAA-tir1afb1.3_IAA 0.0000000							tir1afb1.3_IAA-tir1afb1.2_IAA 0.6763245
tir1afb1.3.4_IAA	0.916635019761733			tir1afb1.3.4.5_IAA-tir1afb1.3.4_IAA 0.8526044							tir1afb1.3.4_IAA-tir1afb1.2_IAA 0.2407787
tir1afb1.3.4_IAA	0.885678486199605			tir1afb1.3.5_IAA-tir1afb1.3.4_IAA 0.8121281							tir1afb1.3.4.5_IAA-tir1afb1.2_IAA 0.0000574
tir1afb1.3.4_IAA	1.04183955253621			tir1afb2_IAA-tir1afb1.3.4_IAA 0.0000000							tir1afb1.3.5_IAA-tir1afb1.2_IAA 1.0000000
tir1afb1.3.4_IAA	1.02489673732131			tir1afb2.3_IAA-tir1afb1.3.4_IAA 0.0000002							tir1afb2_IAA-tir1afb1.2_IAA 0.0000003
tir1afb1.3.4_IAA	1.25560619060345			tir1afb3_IAA-tir1afb1.3.4_IAA 0.0000000							tir1afb2.3_IAA-tir1afb1.2_IAA 0.0226133
tir1afb1.3.4_IAA	1.24940339723664			tir1afb3.4.5_IAA_RESP-tir1afb1.3.4_IAA 0.9996513							tir1afb3_IAA-tir1afb1.2_IAA 0.0004908
tir1afb1.3.4_IAA	1.37839852595749			WT_IAA-tir1afb1.3.4_IAA 0.0000000							tir1afb3.4.5_IAA_RESP-tir1afb1.2_IAA 0.9639536
tir1afb1.3.4_IAA	0.704074480404705			tir1afb1.3.5_IAA-tir1afb1.3.4.5_IAA 0.0056087							WT_IAA-tir1afb1.2_IAA 0.0000000
tir1afb1.3.4_IAA	1.37914515849239			tir1afb2_IAA-tir1afb1.3.4.5_IAA 0.0000000
tir1afb1.3.4_IAA	0.562386598590657			tir1afb2.3_IAA-tir1afb1.3.4.5_IAA 0.0000000							tir1afb1.3_IAA-tir1afb1.2.4.5_IAA 0.2318272
tir1afb1.3.4_IAA	0.573298920254487			tir1afb3_IAA-tir1afb1.3.4.5_IAA 0.0000000							tir1afb1.3.4_IAA-tir1afb1.2.4.5_IAA 0.6428768
tir1afb1.3.4_IAA	0.70413191367662			tir1afb3.4.5_IAA_RESP-tir1afb1.3.4.5_IAA 0.1263147							tir1afb1.3.4.5_IAA-tir1afb1.2.4.5_IAA 1.0000000
tir1afb1.3.4_IAA	0.29681514925618			WT_IAA-tir1afb1.3.4.5_IAA 0.0000000							tir1afb1.3.5_IAA-tir1afb1.2.4.5_IAA 0.0024849
tir1afb1.3.4_IAA	0.471814328780867			tir1afb2_IAA-tir1afb1.3.5_IAA 0.0000003							tir1afb2_IAA-tir1afb1.2.4.5_IAA 0.0000000
tir1afb1.3.4_IAA	1.07526571679067			tir1afb2.3_IAA-tir1afb1.3.5_IAA 0.0090825							tir1afb2.3_IAA-tir1afb1.2.4.5_IAA 0.0000000
tir1afb1.3.4_IAA	0.807167203491942			tir1afb3_IAA-tir1afb1.3.5_IAA 0.0002489							tir1afb3_IAA-tir1afb1.2.4.5_IAA 0.0000000
tir1afb1.3.4_IAA	1.07830968020216			tir1afb3.4.5_IAA_RESP-tir1afb1.3.5_IAA 0.9999471							tir1afb3.4.5_IAA_RESP-tir1afb1.2.4.5_IAA 0.0606794
tir1afb1.3.4_IAA	1.07629951568514			WT_IAA-tir1afb1.3.5_IAA 0.0000000							WT_IAA-tir1afb1.2.4.5_IAA 0.0000000
tir1afb1.3.4_IAA	0.940182661246841			tir1afb2.3_IAA-tir1afb2_IAA 0.8204018
tir1afb1.3.4_IAA	0.289233957363415			tir1afb3_IAA-tir1afb2_IAA 0.9595103							tir1afb1.3.4_IAA-tir1afb1.3_IAA 1.0000000
tir1afb1.3.4_IAA	0.711827972113216			tir1afb3.4.5_IAA_RESP-tir1afb2_IAA 0.0000000							tir1afb1.3.4.5_IAA-tir1afb1.3_IAA 0.4128449
tir1afb1.3.4_IAA	0.897854339845563			WT_IAA-tir1afb2_IAA 0.0621969							tir1afb1.3.5_IAA-tir1afb1.3_IAA 0.9880044
tir1afb1.3.4_IAA	0.381069759155332			tir1afb3_IAA-tir1afb2.3_IAA 1.0000000							tir1afb2_IAA-tir1afb1.3_IAA 0.0000000
tir1afb1.2.4.5_IAA	1.1879328767476			tir1afb3.4.5_IAA_RESP-tir1afb2.3_IAA 0.0000696							tir1afb2.3_IAA-tir1afb1.3_IAA 0.0000034
tir1afb1.2.4.5_IAA	1.33067599577744			WT_IAA-tir1afb2.3_IAA 0.0000049							tir1afb3_IAA-tir1afb1.3_IAA 0.0000000
tir1afb1.2.4.5_IAA	0.519674167718015			tir1afb3.4.5_IAA_RESP-tir1afb3_IAA 0.0000004							tir1afb3.4.5_IAA_RESP-tir1afb1.3_IAA 1.0000000
tir1afb1.2.4.5_IAA	1.02904619068462			WT_IAA-tir1afb3_IAA 0.0000065							WT_IAA-tir1afb1.3_IAA 0.0000000
tir1afb1.2.4.5_IAA	0.822472257267178			WT_IAA-tir1afb3.4.5_IAA_RESP 0.0000000
tir1afb1.2.4.5_IAA	0.994422487705657										tir1afb1.3.4.5_IAA-tir1afb1.3.4_IAA 0.8526044
tir1afb1.2.4.5_IAA	0.772342233322175										tir1afb1.3.5_IAA-tir1afb1.3.4_IAA 0.8121281
tir1afb1.2.4.5_IAA	0.93462756507634										tir1afb2_IAA-tir1afb1.3.4_IAA 0.0000000
tir1afb1.2.4.5_IAA	0.658593810345272										tir1afb2.3_IAA-tir1afb1.3.4_IAA 0.0000002
tir1afb1.2.4.5_IAA	0.699271350961661										tir1afb3_IAA-tir1afb1.3.4_IAA 0.0000000
tir1afb1.2.4.5_IAA	1.38824055717191										tir1afb3.4.5_IAA_RESP-tir1afb1.3.4_IAA 0.9996513
tir1afb1.2.4.5_IAA	1.06303264759649										WT_IAA-tir1afb1.3.4_IAA 0.0000000
tir1afb1.2.4.5_IAA	0.978703751383919
tir1afb1.2.4.5_IAA	1.16361131852004										tir1afb1.3.5_IAA-tir1afb1.3.4.5_IAA 0.0056087
tir1afb1.2.4.5_IAA	0.635440536574061										tir1afb2_IAA-tir1afb1.3.4.5_IAA 0.0000000
tir1afb1.2.4.5_IAA	0.888427225211772										tir1afb2.3_IAA-tir1afb1.3.4.5_IAA 0.0000000
tir1afb1.2.4.5_IAA	1.4036406704601										tir1afb3_IAA-tir1afb1.3.4.5_IAA 0.0000000
tir1afb1.2.4.5_IAA	1.83123278148253										tir1afb3.4.5_IAA_RESP-tir1afb1.3.4.5_IAA 0.1263147
tir1afb1.2.4.5_IAA	0.994741110739206										WT_IAA-tir1afb1.3.4.5_IAA 0.0000000
tir1afb1.2.4.5_IAA	0.340501815185767
tir1afb1.2.4.5_IAA	0.45191366924998										tir1afb2.3_IAA-tir1afb2_IAA 0.8204018
tir1afb1.2.4.5_IAA	0.555890985864723										tir1afb3_IAA-tir1afb2_IAA 0.9595103
tir1afb1.2.4.5_IAA	1.69454350009012										tir1afb3.4.5_IAA_RESP-tir1afb2_IAA 0.0000000
tir1afb1.2.4.5_IAA	1.21639653441129										WT_IAA-tir1afb2_IAA 0.0621969
tir1afb1.2.4.5_IAA	0.851573160997964
tir1afb1.2.4.5_IAA	0.749295167228816										tir1afb3_IAA-tir1afb2.3_IAA 1.0000000
tir1afb1.2.4.5_IAA	1.06844923916682										tir1afb3.4.5_IAA_RESP-tir1afb2.3_IAA 0.0000696
tir1afb1.2.4.5_IAA	1.66629225778213										WT_IAA-tir1afb2.3_IAA 0.0000049
tir1afb1.2.4.5_IAA	0.655088956976235
tir1afb1.2.4.5_IAA	0.602303741084992										tir1afb3.4.5_IAA_RESP-tir1afb3_IAA 0.0000004
tir1afb1.2.4.5_IAA	0.923157135868586										WT_IAA-tir1afb3_IAA 0.0000065
tir1afb1.2.4.5_IAA	1.03382553618785										WT_IAA-tir1afb3.4.5_IAA_RESP 0.0000000
tir1afb1.2.4.5_IAA	1.00143219444373
tir1afb1.2.4.5_IAA	1.7356458714179
tir1afb1.2.4.5_IAA	1.02033716110095
tir1afb1.2.4.5_IAA	1.69847318417055
tir1afb1.2.4.5_IAA	0.792734107469297
tir1afb1.2.4.5_IAA	1.58472476119365
tir1afb1.3.4.5_IAA	1.01321404549105
tir1afb1.3.4.5_IAA	1.47857835407073
tir1afb1.3.4.5_IAA	1.15354747855586
tir1afb1.3.4.5_IAA	0.961358927579201
tir1afb1.3.4.5_IAA	0.968850036105794
tir1afb1.3.4.5_IAA	0.868302712771102
tir1afb1.3.4.5_IAA	0.981168747905075
tir1afb1.3.4.5_IAA	1.07314291370378
tir1afb1.3.4.5_IAA	0.866055380213125
tir1afb1.3.4.5_IAA	0.891441914664351
tir1afb1.3.4.5_IAA	0.796887478150932
tir1afb1.3.4.5_IAA	1.18559277614183
tir1afb1.3.4.5_IAA	0.896852159711334
tir1afb1.3.4.5_IAA	1.17893401300708
tir1afb1.3.4.5_IAA	0.872214736112767
tir1afb1.3.4.5_IAA	1.66236021658977
tir1afb1.3.4.5_IAA	0.869384761780498
tir1afb1.3.4.5_IAA	1.03468855660061
tir1afb1.3.4.5_IAA	1.16536678312003
tir1afb1.3.4.5_IAA	0.957946311472644
tir1afb1.3.4.5_IAA	0.597041349569318
tir1afb1.3.4.5_IAA	1.3075313760469
tir1afb1.3.4.5_IAA	1.12133571189152
tir1afb1.3.4.5_IAA	1.02969448424955
tir1afb1.3.4.5_IAA	1.10785171654365
tir1afb1.3.4.5_IAA	0.983832253158975
tir1afb1.3.4.5_IAA	0.79913481070891
tir1afb1.3.4.5_IAA	1.13731674341491
tir1afb1.3.4.5_IAA	0.858980444382456
tir1afb1.3.4.5_IAA	1.16187093247429
tir1afb1.3.4.5_IAA	0.437147799796187
tir1afb1.3.4.5_IAA	0.964188901911469
tir1afb1.3.4.5_IAA	1.05316662429954
tir1afb1.3.4.5_IAA	1.03244122404263
tir1afb1.3.4.5_IAA	0.702832448872623
tir1afb1.3.4.5_IAA	0.473854231576487
tir1afb1.3.4.5_IAA	0.544686824422362
tir1afb1.3.4.5_IAA	1.33549818121284
tir1afb1.3.4.5_IAA	1.4298029141087
tir1afb1.3.4.5_IAA	1.25442774004729
tir1afb1.3.4.5_IAA	1.35922002488038
tir1afb1.3.4.5_IAA	0.577980640096102
tir1afb1.3.4.5_IAA	1.30894636321303
tir1afb1.3.4.5_IAA	0.477183613143858
tir1afb1.3.4.5_IAA	1.15662715650568
tir1afb1.3.4.5_IAA	0.966269765391079
tir1afb1.3.4.5_IAA	0.886780780470028
tir1afb1.3.4.5_IAA	1.05383250061301
afb1.2.3.4.5_IAA	0.916462407396956
afb1.2.3.4.5_IAA	0.857077488365993
afb1.2.3.4.5_IAA	1.33779424393056
afb1.2.3.4.5_IAA	0.895386206360076
afb1.2.3.4.5_IAA	1.39359172448717
afb1.2.3.4.5_IAA	0.748621535917855
afb1.2.3.4.5_IAA	1.43177231967859
afb1.2.3.4.5_IAA	1.43151607407328
afb1.2.3.4.5_IAA	0.913579644337202
afb1.2.3.4.5_IAA	1.30339327141748
afb1.2.3.4.5_IAA	0.969249002091146
afb1.2.3.4.5_IAA	0.971491151137624
afb1.2.3.4.5_IAA	1.19641073119989
afb1.2.3.4.5_IAA	0.674118126173505
afb1.2.3.4.5_IAA	1.2402927911095
afb1.2.3.4.5_IAA	0.810376726797951
afb1.2.3.4.5_IAA	1.30236828899623
afb1.2.3.4.5_IAA	0.765341561664437
afb1.2.3.4.5_IAA	0.60743020739116
afb1.2.3.4.5_IAA	0.705444151422848
afb1.2.3.4.5_IAA	1.10826224297269
afb1.2.3.4.5_IAA	0.953041467555188
afb1.2.3.4.5_IAA	0.573029234878078
afb1.2.3.4.5_IAA	0.247597316132339
afb1.2.3.4.5_IAA	1.03170886838585
afb1.2.3.4.5_IAA	0.545482832307079
afb1.2.3.4.5_IAA	1.05739749031834
afb1.2.3.4.5_IAA	1.14291946109109
afb1.2.3.4.5_IAA	1.04368835043417
afb1.2.3.4.5_IAA	0.994425132813012
afb1.2.3.4.5_IAA	0.871491303664769
afb1.2.3.4.5_IAA	0.653490354945922
afb1.2.3.4.5_IAA	0.8986533378278
afb1.2.3.4.5_IAA	0.891222215273763
afb1.2.3.4.5_IAA	0.706469133844095
afb1.2.3.4.5_IAA	0.725495370038483
afb1.2.3.4.5_IAA	0.695130265809057
afb1.2.3.4.5_IAA	0.983662817389924
afb1.2.3.4.5_IAA	1.09673119073367
afb1.2.3.4.5_IAA	0.577449471569702
afb1.2.3.4.5_IAA	1.14990215383583
afb1.2.3.4.5_IAA	0.997051650267456
afb1.2.3.4.5_IAA	0.902689206111458
afb1.2.3.4.5_IAA	0.55368269167705
afb1.2.3.4.5_IAA	0.583214997689214
afb1comp_IAA	0.724503235832785
afb1comp_IAA	0.547686971984284
afb1comp_IAA	0.633065930896646
afb1comp_IAA	0.902880929068857
afb1comp_IAA	0.259884307267259
afb1comp_IAA	0.522704101783153
afb1comp_IAA	0.727438723081416
afb1comp_IAA	0.648617767596849
afb1comp_IAA	0.700457223264196
afb1comp_IAA	1.08706713962669
afb1comp_IAA	0.466680015357118
afb1comp_IAA	0.350821954799374
afb1comp_IAA	0.328524743144864
afb1comp_IAA	0.536881880622294
afb1comp_IAA	0.385735515905453
afb1comp_IAA	0.412966844424687
afb1comp_IAA	0.614266321070296
afb1comp_IAA	0.343951665494064
afb1comp_IAA	0.561240179068397
afb1comp_IAA	0.426082851280281
afb1comp_IAA	0.130410582449901
afb1comp_IAA	0.299607070887058
afb1comp_IAA	0.438824115082857
afb1comp_IAA	0.484168024497908
afb1comp_IAA	0.293548724863282
afb1comp_IAA	0.430517310740981
afb1comp_IAA	0.393605120018811
afb1comp_IAA	0.377678540265589
afb1comp_IAA	0.303167129890719
afb1comp_IAA	0.801637847578775
afb1comp_IAA	0.612704891682725
afb1comp_IAA	0.453876294379039
afb1comp_IAA	0.447130919424733
afb1comp_IAA	0.47823459282514
afb1comp_IAA	0.540067196572939
afb1comp_IAA	0.574855843328012
afb1comp_IAA	0.360128073949296
afb1comp_IAA	0.382175456901793
afb1comp_IAA	0.241584354844933
afb1comp_IAA	0.35425709945203
afb1comp_IAA	0.328337371618359
afb1comp_IAA	0.405034783135827
afb1comp_IAA	0.376616768282042
afb1comp_IAA	0.306914560420889
afb1comp_IAA	0.448130234232778
afb1comp_IAA	0.442946288666045
afb1comp_IAA	0.754045479845621
afb1comp_IAA	0.28749037883951
afb1comp_IAA	0.434889313026178
afb1comp_IAA	0.516083641179852
afb1comp_IAA	0.480108308090225
afb1comp_IAA	0.254450532998515
afb1comp_IAA	0.436575656764755
afb1comp_IAA	0.695710477925982
afb1comp_IAA	0.663170289489007
tir1_IAA	0.504398054944713
tir1_IAA	0.364883699321707
tir1_IAA	0.72635271161768
tir1_IAA	0.764889893765292
tir1_IAA	0.422933378759253
tir1_IAA	0.824681760460867
tir1_IAA	0.757363644810606
tir1_IAA	0.724749899340291
tir1_IAA	0.779036454300491
tir1_IAA	0.672623656580047
tir1_IAA	0.923498621736302
tir1_IAA	0.396382444946884
tir1_IAA	0.621124601232694
tir1_IAA	0.592483042710689
tir1_IAA	0.735551460340076
tir1_IAA	0.639243348716203
tir1_IAA	0.697502090624711
tir1_IAA	0.56732585870474
tir1_IAA	0.555478985350142
tir1_IAA	0.302861832935858
tir1_IAA	0.803148325951622
tir1_IAA	0.778060829435997
tir1_IAA	0.483631182829002
tir1_IAA	0.264742775730171
tir1_IAA	0.402375569114504
tir1_IAA	0.724192399417723
tir1_IAA	0.714645213243721
tir1_IAA	0.62328491343265
tir1_IAA	0.631647412271194
tir1_IAA	0.615967726948927
tir1_IAA	0.618267414129526
tir1_IAA	0.314569331309815
tir1_IAA	0.330806516554649
tir1_IAA	0.347810264193019
tir1_IAA	0.282025273329824
tir1_IAA	0.332897141264285
tir1_IAA	0.352688388515501
tir1_IAA	0.122301545513675
tir1_IAA	0.304046520271318
tir1_IAA	0.214289032737634
tir1_IAA	0.484885557654785
tir1_IAA	0.360354012450832
tir1_IAA	0.52711617678942
tir1_IAA	0.363908074457212
tir1_IAA	0.143904667513241
tir1_IAA	0.772137392758695
tir1_IAA	0.168574039086938
tir1_IAA	0.262164338588288
tir1_IAA	0.128503732152259
tir1_IAA	0.346904326818844
tir1_IAA	0.453804936971538
afb2.3_IAA	0.874812882018135
afb2.3_IAA	0.543382318353749
afb2.3_IAA	0.645318384186075
afb2.3_IAA	0.838731277825584
afb2.3_IAA	0.914491578653193
afb2.3_IAA	0.550244463936381
afb2.3_IAA	0.651571791047667
afb2.3_IAA	0.642330030464606
afb2.3_IAA	0.575700810452597
afb2.3_IAA	0.496454096949943
afb2.3_IAA	0.550687183006229
afb2.3_IAA	0.670940750353484
afb2.3_IAA	0.398004443792664
afb2.3_IAA	0.441778291823809
afb2.3_IAA	0.328718909361571
afb2.3_IAA	0.558877485798402
afb2.3_IAA	0.345984953085614
afb2.3_IAA	0.387545205767522
afb2.3_IAA	0.437406441009068
afb2.3_IAA	0.518313351023649
afb4.5_IAA	0.413379093711825
afb4.5_IAA	0.299040195451107
afb4.5_IAA	0.254835246772888
afb4.5_IAA	0.103316217259561
afb4.5_IAA	0.0677923437739624
afb4.5_IAA	0.178875838837448
afb4.5_IAA	0.354382049804072
afb4.5_IAA	0.0849260448120323
afb4.5_IAA	0.230219829614861
afb4.5_IAA	0.169338078592921
afb4.5_IAA	0.340846425983997
afb4.5_IAA	0.166539574090036
afb4.5_IAA	0.555360362980629
afb4.5_IAA	0.327939037868651
afb4.5_IAA	0.391333731709508
afb4.5_IAA	0.389106350574561
afb4.5_IAA	0.376370299469596
afb4.5_IAA	0.399557908207782
afb4.5_IAA	0.276252373070476
afb4.5_IAA	0.474260844733766
afb4.5_IAA	0.529374249739556
afb4.5_IAA	1.10004071898086
afb4.5_IAA	0.514239480489262
afb4.5_IAA	0.0761307449458219
afb4.5_IAA	0.568953099137499
afb4.5_IAA	0.251522731238861
afb4.5_IAA	0.421603270210099
afb4.5_IAA	0.486597109481177
afb4.5_IAA	0.579404656770719
afb4.5_IAA	0.47671667521589
afb4.5_IAA	0.724298655215997
afb4.5_IAA	0.55987223758732
afb4.5_IAA	0.68591916489072
afb4.5_IAA	0.66558717299221
afb4.5_IAA	0.797059772290998
afb4.5_IAA	0.490709197730313
afb4.5_IAA	0.278765315889392
afb4.5_IAA	0.681007503926474
afb4.5_IAA	0.224679932945886
afb4.5_IAA	0.173564391515644
afb4.5_IAA	0.525947509531944
afb4.5_IAA	0.433882422620717
afb4.5_IAA	0.523434566713027
afb4.5_IAA	0.392190416761414
afb4.5_IAA	0.142323943289565
afb4.5_IAA	0.521435634925252
afb4.5_IAA	0.674039798837658
afb4.5_IAA	0.640686194150216
afb4.5_IAA	0.413321981375032
afb4.5_IAA	0.278365529531836
afb4.5_IAA	0.15328951195393
afb4.5_IAA	0.448274731492693
afb4.5_IAA	0.42017546179026
afb4.5_IAA	0.370544841116651
afb4.5_IAA	0.345301188253896
afb4.5_IAA	0.26334498495513
afb4.5_IAA	0.164140855944706
afb4.5_IAA	0.369973717748715
afb4.5_IAA	0.390762608341574
tir1afb2_IAA	0.875636207654408
tir1afb2_IAA	0.625513355794306
tir1afb2_IAA	0.639418890079109
tir1afb2_IAA	0.585151953315115
tir1afb2_IAA	0.643130960672085
tir1afb2_IAA	0.688265025342247
tir1afb2_IAA	0.973917695735125
tir1afb2_IAA	0.699165550099401
tir1afb2_IAA	0.930963736016395
tir1afb2_IAA	1.15675190287809
tir1afb2_IAA	0.251006678191763
tir1afb2_IAA	0.537719940182635
tir1afb2_IAA	0.532122373415447
tir1afb2_IAA	0.317823948865343
tir1afb2_IAA	0.411332774755092
tir1afb2_IAA	0.11147996130019
tir1afb2_IAA	0.284474235283997
tir1afb2_IAA	0.437965408215813
tir1afb2_IAA	0.0512030054809013
tir1afb2_IAA	-0.0287538166567081
tir1afb2_IAA	0.432308919693182
tir1afb2_IAA	0.513208489917898
tir1afb2_IAA	0.119434398285141
tir1afb2_IAA	0.741530292263691
tir1afb2_IAA	0.44267914865134
tir1afb2_IAA	0.319709445039555
tir1afb2_IAA	0.575253098400511
tir1afb2_IAA	0.439438452101915
tir1afb2_IAA	0.403790790058251
tir1afb2_IAA	0.2376903614614
tir1afb2_IAA	0.28901121045319
tir1afb2_IAA	0.19921445515642
tir1afb2_IAA	0.270333013977417
tir1afb2_IAA	0.307748328684407
tir1afb2_IAA	0.296494273394589
tir1afb2_IAA	0.308514311505181
tir1afb2_IAA	0.297437021481694
tir1afb2_IAA	0.22696660197058
tir1afb2_IAA	0.297083490949029
tir1afb2_IAA	0.341981868597415
tir1afb2_IAA	0.276166267766384
tir1afb2_IAA	0.207522422674034
tir1afb2_IAA	0.237572517950513
tir1afb2_IAA	0.292251907002614
tir1afb2_IAA	0.274104006325838
tir1afb2_IAA	1.06165218959135
tir1afb2_IAA	1.02836139776545
tir1afb2_IAA	0.647844701107611
tir1afb2_IAA	0.548620464939788
tir1afb3_IAA	0.789017397564285
tir1afb3_IAA	0.81782521599112
tir1afb3_IAA	0.800282369332008
tir1afb3_IAA	0.394802057421928
tir1afb3_IAA	1.04987190006063
tir1afb3_IAA	0.913460132560853
tir1afb3_IAA	1.16480981512818
tir1afb3_IAA	1.09041406407884
tir1afb3_IAA	0.692913107170896
tir1afb3_IAA	0.925722523703844
tir1afb3_IAA	0.516487221204522
tir1afb3_IAA	1.46098469785457
tir1afb3_IAA	0.824865823345946
tir1afb3_IAA	0.520535570433547
tir1afb3_IAA	0.580204717765706
tir1afb3_IAA	0.647207831092477
tir1afb3_IAA	1.00017694648114
tir1afb3_IAA	0.661113030618259
tir1afb3_IAA	0.85461238942009
tir1afb3_IAA	0.913225445649027
tir1afb3_IAA	0.809259143709413
tir1afb3_IAA	0.640225895465606
tir1afb3_IAA	0.87368070100608
tir1afb3_IAA	1.19531911366576
tir1afb3_IAA	0.892279638768416
tir1afb3_IAA	0.550810182059303
tir1afb3_IAA	0.487210028954032
tir1afb3_IAA	0.458519553983112
tir1afb3_IAA	0.187749529462055
tir1afb3_IAA	0.178538068172822
tir1afb3_IAA	0.418857465884252
tir1afb3_IAA	0.372272113886481
tir1afb3_IAA	0.350856933182215
tir1afb3_IAA	0.263846760622143
tir1afb3_IAA	0.226766228553388
tir1afb3_IAA	0.579794015670008
tir1afb3_IAA	0.504576860429271
tir1afb3_IAA	0.526461414957194
tir1afb3_IAA	0.261617234959782
tir1afb3_IAA	0.660115611242994
tir1afb3_IAA	0.322107786483337
tir1afb3_IAA	0.263142699886661
tir1afb3_IAA	0.28279772875222
tir1afb3_IAA	0.714797661698816
tir1afb3_IAA	0.550986197243173
tir1afb3_IAA	0.727998800489118
tir1afb3_IAA	0.422964486841235
tir1afb3_IAA	0.479993406415334
tir1afb3_IAA	0.239791352159819
tir1afb3_IAA	0.235449644291009
tir1afb3_IAA	0.227176930649086
tir1afb3_IAA	0.303332833537133
tir1afb3_IAA	0.231459966789939
tir1afb3_IAA	0.417566687869201
tir1afb3_IAA	0.504166158333572
tir1afb3_IAA	0.324689342513443
tir1afb3_IAA	0.503638112781961
tir1afb3_IAA	0.109481444367562
tir1afb3_IAA	0.132187403086878
tir1afb3_IAA	0.179946189643789
tir1afb3_IAA	0.239087291424336
tir1afb3_IAA	0.115583304075078
tir1afb3_IAA	0.177247290157771
tir1afb3_IAA	0.242490251645835
tir1afb3_IAA	0.228643723848009
tir1afb3_IAA	0.443440919898191
tir1afb2.3_IAA	0.955996658855193
tir1afb2.3_IAA	0.397108981646905
tir1afb2.3_IAA	0.690503259936426
tir1afb2.3_IAA	0.57739158681176
tir1afb2.3_IAA	0.527912480567995
tir1afb2.3_IAA	0.897062576857931
tir1afb2.3_IAA	1.14480614399406
tir1afb2.3_IAA	0.435508944523075
tir1afb2.3_IAA	0.418049142671523
tir1afb2.3_IAA	0.763358778625955
tir1afb2.3_IAA	0.301863152277316
tir1afb2.3_IAA	1.15234692220237
tir1afb2.3_IAA	0.286433559943385
tir1afb2.3_IAA	0.367351910717187
tir1afb2.3_IAA	0.686036798997656
tir1afb2.3_IAA	0.106615002668274
tir1afb2.3_IAA	0.749843383837213
tir1afb2.3_IAA	0.403315622172207
tir1afb2.3_IAA	1.02003526763962
tir1afb2.3_IAA	1.0127845193624
tir1afb2.3_IAA	0.82298893245783
tir1afb2.3_IAA	0.885171349683288
tir1afb2.3_IAA	0.863825146755146
tir1afb2.3_IAA	0.312014199865425
tir1afb2.3_IAA	0.645258590686558
tir1afb2.3_IAA	0.531566857699715
tir1afb2.3_IAA	0.641894243485928
tir1afb2.3_IAA	0.417469082809345
tir1afb2.3_IAA	0.314508457272791
tir1afb2.3_IAA	0.990800250585859
tir1afb2.3_IAA	0.71387967238219
tir1afb2.3_IAA	0.650479129446159
tir1afb2.3_IAA	0.251049908350542
tir1afb2.3_IAA	0.405983897538226
tir1afb2.3_IAA	0.861040859416692
tir1afb2.3_IAA	0.220306735655121
tir1afb2.3_IAA	0.375124712870367
tir1afb2.3_IAA	0.240434812872689
tir1afb2.3_IAA	0.497575349776096
tir1afb2.3_IAA	0.165897120582844
tir1afb2.3_IAA	0.225469268428502
tir1afb2.3_IAA	0.346817791596093
tir1afb2.3_IAA	0.611499106707811
tir1afb2.3_IAA	0.635455579015753
tir1afb2.3_IAA	0.488526415926124
tir1afb2.3_IAA	0.349660084920763
tir1afb2.3_IAA	0.259112740434813
tir1afb3.4.5_IAA_RESP	1.23628945297701
tir1afb3.4.5_IAA_RESP	1.00687203100866
tir1afb3.4.5_IAA_RESP	1.02137382333226
tir1afb3.4.5_IAA_RESP	1.35608078570804
tir1afb3.4.5_IAA_RESP	0.740104333634483
tir1afb3.4.5_IAA_RESP	0.93506251275027
tir1afb3.4.5_IAA_RESP	1.39072654678985
tir1afb3.4.5_IAA_RESP	1.04221723545012
tir1afb3.4.5_IAA_RESP	0.905872409873809
tir1afb3.4.5_IAA_RESP	1.2634278553318
tir1afb3.4.5_IAA_RESP	0.790744032873839
tir1afb3.4.5_IAA_RESP	0.669460554308863
tir1afb3.4.5_IAA_RESP	1.29858654154402
tir1afb3.4.5_IAA_RESP	1.23568326873197
tir1afb3.4.5_IAA_RESP	1.03498965406697
tir1afb3.4.5_IAA_RESP	1.03955935068341
tir1afb3.4.5_IAA_RESP	1.24650132602804
tir1afb3.4.5_IAA_RESP	1.03429021070731
tir1afb3.4.5_IAA_RESP	1.27466557864366
tir1afb3.4.5_IAA_RESP	0.700329321248507
tir1afb3.4.5_IAA_RESP	0.539037682511002
tir1afb3.4.5_IAA_RESP	0.686526972284557
tir1afb3.4.5_IAA_RESP	0.448110045755252
tir1afb3.4.5_IAA_RESP	0.671558884387842
tir1afb3.4.5_IAA_RESP	0.837933144872207
tir1afb3.4.5_IAA_RESP	0.9430827966077
tir1afb3.4.5_IAA_RESP	0.77050680500102
tir1afb3.4.5_IAA_RESP	0.705924868125783
tir1afb3.4.5_IAA_RESP	0.724669950164661
tir1afb3.4.5_IAA_RESP	1.20271617171335
tir1afb3.4.5_IAA_RESP	0.574662664296331
tir1afb3.4.5_IAA_RESP	0.569207006090986
tir1afb3.4.5_IAA_RESP	0.572704222889285
tir1afb3.4.5_IAA_RESP	1.04855885524437
tir1afb3.4.5_IAA_RESP	0.582076763908723
tir1afb3.4.5_IAA_RESP	0.636353568618308
tir1afb3.4.5_IAA_RESP	0.431836330253839
tir1afb3.4.5_IAA_RESP	0.692635444292251
tir1afb3.4.5_IAA_RESP	0.537732054906304
tir1afb3.4.5_IAA_RESP	0.79820476204354
tir1afb3.4.5_IAA_RESP	0.748451024393087
tir1afb3.4.5_IAA_RESP	0.531483694226678
tir1afb3.4.5_IAA_RESP	0.670999329700114
tir1afb3.4.5_IAA_RESP	0.582636318596451
tir1afb3.4.5_IAA_RESP	0.498469967650744
tir1afb3.4.5_IAA_RESP	0.840171363623117
tir1afb3.4.5_IAA_RESP	0.813825663742605
tir1afb3.4.5_IAA_RESP	0.51269198263049
tir1afb3.4.5_IAA_RESP	0.434167808119372

## Sheet: t-tests_Figure6sup4
Pairwise 2-tailed t-tests (unequal variance) p values for phenotypes measured in Figure 6—figure supplement 4. Green fill indicates p < 0.05.
Genotypes Compared, Day1		10min	20min	30min	40min	50min	60min	70min	80min	90min	100min	110min	120min	130min	140min	150min	160min	170min	180min
Col-0	tir1afb134	0.420042	0.00114952	0.0053585	0.234126	0.45012	0.959346	0.461236	0.081198	0.046975	0.00799356	0.0055678	0.00528638	0.00268653	0.00249304	0.000903618	0.00104196	0.00115901	0.00133258
Col-0	tir1afb135	0.956957	0.000150482	6.87825e-05	0.0017433	0.000589697	0.000940827	0.0104245	0.0498008	0.11567	0.231706	0.182151	0.228316	0.330345	0.322235	0.346401	0.498728	0.371614	0.405224
Col-0	tir1afb1345	0.00305165	0.0199842	0.00263652	0.0058073	0.00703793	0.0168046	0.0578951	0.142331	0.189612	0.22195	0.214911	0.194076	0.143719	0.143895	0.178004	0.154788	0.0987357	0.121628
Col-0	afb1345	0.369515	0.000218897	0.000649023	0.0292056	0.0208278	0.00574907	0.00580453	0.00413888	0.00460056	0.00809043	0.0104489	0.00845467	0.0118763	0.00957929	0.00651633	0.0105783	0.00639623	0.00780228
Col-0	tir1afb345	0.899143	0.00128284	0.000143819	0.000859948	0.000125705	0.000101125	0.00030271	0.000200218	0.000546155	0.000821476	0.000401829	0.0002	0.000264812	0.000381281	0.000201806	0.000649082	0.000233705	0.000797244
Col-0	afb1245	0.593695	0.000274628	1.20392e-07	3.24571e-06	1.6423e-07	6.45746e-08	1.53673e-07	3.29756e-07	9.85795e-07	4.96518e-06	6.35199e-06	1.17847e-05	2.68816e-05	0.000180001	0.000271795	0.000284161	0.000385634	0.000285748
Col-0	afb12345	0.548804	0.000908446	0.000119741	0.000209809	3.60824e-05	1.64618e-05	7.39961e-05	0.000112269	0.000222851	0.000190042	0.000137608	8.44918e-05	0.000130638	8.07531e-05	0.000125715	0.000114968	7.82838e-05	0.000123845
tir1afb134	tir1afb135	0.506659	0.27834	0.136161	0.00305962	0.000304219	0.000181907	0.000651368	0.000739913	0.000856588	0.000538259	0.000188061	0.000212264	0.000179465	6.52012e-05	3.34168e-05	7.11281e-05	2.492e-05	2.69678e-05
tir1afb134	tir1afb1345	5.14923e-05	0.209131	0.766612	0.0241368	0.0144133	0.012833	0.0168315	0.0136757	0.012924	0.00534044	0.00423854	0.00290691	0.0010819	0.00074036	0.000727861	0.00027762	0.000163291	0.000157824
tir1afb134	afb1345	0.814656	0.366555	0.269806	0.130593	0.0447966	0.00402505	0.00134226	0.00015439	8.75783e-05	4.03092e-05	5.01368e-05	4.35798e-05	3.12771e-05	1.91524e-05	8.45962e-06	1.14647e-05	1.3423e-05	1.18765e-05
tir1afb134	tir1afb345	0.293277	0.852646	0.198418	0.00196695	8.12167e-05	2.36414e-05	2.52207e-05	8.26251e-07	1.00238e-06	4.66459e-07	8.07341e-08	1.95887e-08	1.8691e-08	1.01282e-08	4.19267e-09	2.01745e-08	1.46163e-08	3.46408e-08
tir1afb134	afb1245	0.916522	0.310054	7.6462e-05	7.97693e-08	2.04537e-09	3.89225e-09	9.71449e-09	5.12882e-09	3.26697e-09	1.60551e-08	1.3288e-08	8.21052e-09	2.21586e-08	2.42023e-07	6.57744e-07	8.58849e-08	7.86918e-07	1.26985e-07
tir1afb134	afb12345	0.114885	0.76683	0.128486	0.000405443	4.35439e-05	9.30432e-06	1.9624e-05	9.11352e-06	1.38555e-05	5.45519e-06	4.37966e-06	2.23798e-06	3.00598e-06	1.73704e-06	2.49019e-06	1.94539e-06	1.98036e-06	2.54932e-06
tir1afb135	tir1afb1345	0.00491952	0.0292115	0.234577	0.891667	0.785921	0.852203	0.996019	0.996767	0.872434	0.750382	0.803114	0.689191	0.466146	0.464901	0.508951	0.369706	0.323503	0.358947
tir1afb135	afb1345	0.440018	0.850363	0.855277	0.46751	0.647464	0.858866	0.33391	0.188633	0.103216	0.0972766	0.133029	0.0811667	0.0761006	0.0569608	0.0383217	0.0367501	0.029418	0.0315818
tir1afb135	tir1afb345	0.862496	0.169006	0.823715	0.52332	0.316067	0.243445	0.108148	0.0677459	0.0424719	0.0272527	0.0204282	0.00731756	0.0044494	0.00408498	0.00219516	0.00306016	0.00148018	0.00399427
tir1afb135	afb1245	0.630359	0.917597	0.00113746	0.00024514	4.24877e-05	5.43747e-05	4.69978e-05	0.000113654	9.20854e-05	0.000176948	0.000291705	0.000358087	0.00036495	0.0015111	0.00196631	0.00122321	0.00213918	0.00128072
tir1afb135	afb12345	0.544938	0.489151	0.867068	0.152846	0.0617919	0.0188779	0.0092116	0.00546915	0.00388836	0.00178852	0.00146393	0.000699267	0.00068247	0.000400733	0.00053313	0.000335464	0.000292548	0.000419503
tir1afb1345	afb1345	0.000202349	0.042367	0.400038	0.595209	0.853018	0.763511	0.432363	0.282861	0.246191	0.287239	0.320783	0.273428	0.404527	0.342413	0.258282	0.295371	0.272911	0.255098
tir1afb1345	tir1afb345	0.00206022	0.239465	0.32541	0.516087	0.311773	0.304422	0.227654	0.170632	0.181355	0.163112	0.135297	0.101792	0.12894	0.131928	0.0894562	0.108879	0.0887362	0.124415
tir1afb1345	afb1245	0.0228855	0.0445546	0.000214835	0.00302839	0.00144683	0.00213719	0.00239728	0.0028243	0.00516532	0.00663992	0.00949047	0.0156566	0.0257394	0.0527311	0.047564	0.0558738	0.0725084	0.0550681
tir1afb1345	afb12345	0.00815783	0.150104	0.213584	0.186631	0.0814043	0.0416302	0.0289883	0.0168631	0.017389	0.0109895	0.00815834	0.00575802	0.0088685	0.00585203	0.00586755	0.00471823	0.00432777	0.00487214
afb1345	tir1afb345	0.271719	0.239849	0.999079	0.251196	0.26696	0.46853	0.727227	0.836208	0.943973	0.76638	0.629155	0.642813	0.495263	0.615802	0.599023	0.636598	0.640605	0.808809
afb1345	afb1245	0.982617	0.794944	0.00714825	0.00199144	0.00280347	0.0033668	0.0144722	0.0183503	0.0398891	0.0403711	0.0532454	0.140756	0.117301	0.285382	0.334627	0.396225	0.519169	0.492766
afb1345	afb12345	0.121111	0.598424	0.755779	0.0840419	0.0764887	0.0683606	0.127383	0.102502	0.115331	0.0605697	0.040941	0.0429618	0.0353018	0.0314155	0.0410905	0.0337678	0.0393928	0.0458791
tir1afb345	afb1245	0.532838	0.217969	0.000967673	0.00715654	0.00283587	0.00283386	0.0082698	0.00660156	0.0141419	0.0365699	0.0621889	0.169128	0.240775	0.447856	0.546325	0.631541	0.797425	0.57414
tir1afb345	afb12345	0.603759	0.626477	0.71342	0.437157	0.313503	0.152603	0.158697	0.0937395	0.0919335	0.0706341	0.0575856	0.0532035	0.0676033	0.0427409	0.0608387	0.0472151	0.0523685	0.0437703
afb1245	afb12345	0.36674	0.488426	0.00659238	0.0700926	0.0964216	0.230022	0.443172	0.691292	0.976351	0.763112	0.510704	0.281904	0.280613	0.137039	0.162661	0.0911497	0.0868318	0.0936433
Genotypes Compared, Day2		10min	20min	30min	40min	50min	60min	70min	80min	90min	100min	110min	120min	130min	140min	150min	160min	170min	180min
Col-0b	tir1afb23	0.458373	0.0500779	0.121104	0.69507	0.324095	0.0388752	0.00431684	0.00165946	0.000330755	0.000141107	8.86961e-05	9.64636e-05	4.80859e-05	4.39669e-05	5.491e-05	4.90784e-05	3.81115e-05	6.46792e-05
Col-0b	tir1afb1245	0.940079	0.00139979	0.000234943	0.000147562	6.42799e-05	0.000348559	0.000412148	0.000179262	4.80622e-05	2.83651e-05	1.10295e-05	9.62957e-06	4.17353e-06	8.07485e-06	9.50089e-06	1.78318e-05	2.27597e-05	2.26373e-05
Col-0b	tir1afb245	0.589782	0.00246471	0.000422649	0.000525741	0.000213778	0.000401692	0.000620034	0.000243448	7.00478e-05	2.84303e-05	8.33561e-06	4.96939e-06	2.35033e-06	2.82221e-06	3.15261e-06	6.43534e-06	9.03946e-06	8.48221e-06
Col-0b	tir1afb125	0.386472	1.63323e-05	6.84814e-05	0.000685912	0.00128577	0.00679969	0.0392352	0.0596099	0.121565	0.174509	0.111228	0.102047	0.101075	0.120169	0.135277	0.156914	0.233615	0.176313
Col-0b	tir1afb124	0.547534	6.46033e-05	0.000723292	0.0121431	0.0573825	0.447023	0.682451	0.413634	0.154651	0.0963281	0.0681366	0.066325	0.0320689	0.0259902	0.0223893	0.0227939	0.0171287	0.0234866
Col-0b	Col-0c	0.277703	0.0101192	0.0568705	0.0645579	0.0697133	0.133506	0.284059	0.280979	0.42295	0.467864	0.456426	0.452467	0.496013	0.484063	0.391037	0.331189	0.377159	0.251327
tir1afb23	tir1afb1245	0.545445	0.232542	0.0177236	0.000384557	5.79018e-05	2.42989e-05	3.10891e-06	1.51818e-06	2.71335e-07	1.94355e-07	1.30509e-07	6.23714e-08	4.37262e-08	3.55438e-08	4.88428e-08	1.76949e-08	1.24316e-08	6.96793e-09
tir1afb23	tir1afb245	0.718606	0.421865	0.0327474	0.00137058	0.00014724	3.15821e-05	2.82502e-06	9.34624e-07	1.40107e-07	5.52215e-08	3.49417e-08	1.18471e-08	9.8055e-09	3.55719e-09	5.26036e-09	1.56847e-09	2.02212e-09	8.85978e-10
tir1afb23	tir1afb125	0.134081	0.00795273	0.00595385	0.00178427	0.000530058	0.000175397	4.49241e-05	3.01461e-05	1.1231e-05	7.80157e-06	4.05734e-06	2.38758e-06	1.82123e-06	1.16569e-06	1.60821e-06	7.59399e-07	8.2765e-07	6.14746e-07
tir1afb23	tir1afb124	0.195537	0.0358953	0.0518304	0.0299467	0.0108152	0.00725391	0.00506503	0.00489176	0.00452517	0.00367178	0.00359567	0.00402181	0.0053565	0.00767874	0.00976096	0.00936023	0.0111961	0.0126035
tir1afb23	Col-0c	0.952432	0.779166	0.7848	0.135253	0.0131156	0.00191335	0.000344085	0.000133008	5.1414e-05	2.72305e-05	1.86244e-05	1.64267e-05	1.29535e-05	9.17152e-06	7.43636e-06	2.98028e-06	2.81947e-06	2.09321e-06
tir1afb1245	tir1afb245	0.706189	0.555981	0.623999	0.310255	0.363104	0.786094	0.808082	0.874582	0.767686	0.94621	0.975985	0.791028	0.874957	0.59244	0.558232	0.546882	0.517612	0.49269
tir1afb1245	tir1afb125	0.41001	0.0383896	0.431497	0.239542	0.0590969	0.0907116	0.0132622	0.00177369	0.000106529	2.76326e-05	1.32166e-05	6.30746e-06	2.70863e-06	6.48643e-06	4.82038e-06	2.57857e-06	2.51816e-06	2.17234e-06
tir1afb1245	tir1afb124	0.551744	0.240423	0.555333	0.00542397	0.000557694	0.000289729	4.92537e-06	7.66676e-07	1.02859e-07	5.62796e-08	2.39465e-08	8.09534e-09	6.46186e-09	9.78629e-09	6.92636e-09	7.1891e-09	9.43163e-09	6.79158e-09
tir1afb1245	Col-0c	0.411037	0.241948	0.0167401	0.00466181	0.00337192	0.00650621	0.00224387	0.000545383	0.00012907	5.97737e-05	2.86426e-05	1.90113e-05	1.60778e-05	2.03786e-05	2.42916e-05	3.02297e-05	3.98677e-05	6.80118e-05
tir1afb245	tir1afb125	0.11044	0.00287981	0.211209	0.851147	0.275269	0.121461	0.0263995	0.00424388	0.000329691	6.54233e-05	2.24092e-05	6.13551e-06	3.02571e-06	4.18003e-06	2.64675e-06	1.47934e-06	9.69331e-07	8.51679e-07
tir1afb245	tir1afb124	0.184393	0.0527595	0.869129	0.0387189	0.00333631	0.000236017	9.69975e-06	1.63449e-06	1.82265e-07	6.3396e-08	1.78625e-08	3.75619e-09	3.22894e-09	2.81755e-09	1.75891e-09	1.85694e-09	2.77485e-09	1.81738e-09
tir1afb245	Col-0c	0.513474	0.49525	0.0346161	0.0234913	0.0151362	0.00790934	0.00410051	0.00106789	0.000263356	8.7436e-05	3.06257e-05	1.31256e-05	1.23804e-05	9.77651e-06	1.09679e-05	1.37041e-05	1.66568e-05	2.74668e-05
tir1afb125	tir1afb124	0.745033	0.267987	0.207118	0.0591169	0.0405532	0.0137077	0.00460121	0.00341957	0.00258651	0.00262371	0.000976229	0.000623	0.000345442	0.000336188	0.000281856	0.000241776	0.000340988	0.000252332
tir1afb125	Col-0c	0.0234717	0.000761241	0.00455512	0.0327108	0.0950978	0.151652	0.280322	0.375285	0.470376	0.552885	0.424587	0.400302	0.391444	0.429149	0.569562	0.709518	0.823182	0.94223
tir1afb124	Col-0c	0.0408865	0.0139187	0.0628698	0.49118	0.924037	0.35755	0.102686	0.0441888	0.0277333	0.0197778	0.0140243	0.0123273	0.0083852	0.00569798	0.00294172	0.00169386	0.00162313	0.00104394

## Sheet: t-tests_Figure7
Pairwise 2-tailed t-tests (unequal variance) p values for phenotypes measured in Figure 7. Green fill indicates p < 0.05.
Genotypes Compared		30min	60min	90min	120min	150min	180min	210min	240min	270min	300min	330min	360min	390min	420min	450min	480min
Col-0	afb1-3	0.985367	0.341595	0.825776	0.720522	0.992563	0.487339	0.444503	0.269822	0.119589	0.178508	0.259795	0.377547	0.764675	0.913513	0.676433	0.520675
Col-0	tir1-1	0.494435	0.355268	0.331024	0.261799	0.318068	0.285875	0.169496	0.125422	0.160196	0.132152	0.143544	0.197144	0.105127	0.11753	0.259923	0.341214
Col-0	tir1-1 afb1-3	0.168263	0.00500182	0.000808201	0.000629411	0.00376976	0.022604	0.0393832	0.063638	0.152845	0.285334	0.580643	0.836707	0.886214	0.762557	0.399383	0.282018
Col-0	tir1afb345	0.489066	0.978419	0.430146	0.0278252	0.00343902	0.00110745	4.75528e-05	1.11599e-05	3.33504e-05	3.80427e-05	6.44647e-05	4.74678e-05	7.36811e-05	6.09242e-05	0.000557968	0.00200061
Col-0	tir1afb1345	0.279183	0.0113256	0.000838968	0.00168275	4.87772e-05	4.00761e-05	2.39211e-06	6.03107e-06	4.1415e-05	6.29306e-05	0.000202495	0.000337723	0.000179963	0.000204573	0.000848878	0.00106529
Col-0	afb1 AFB1-mCitrine#7	0.0886758	0.016324	0.056099	0.622794	0.388941	0.0301896	0.00124637	4.54805e-05	1.1108e-05	3.50758e-05	7.37205e-06	6.25415e-05	3.54265e-05	7.98687e-05	0.000623766	0.000451757
Col-0	afb1 AFB1-mCitrine#5	0.901519	0.331252	0.0297004	0.0966952	0.060006	0.235264	0.660313	0.547705	0.410872	0.286835	0.225753	0.376606	0.143368	0.0529802	0.253952	0.242911
afb1-3	tir1-1	0.380547	0.878099	0.409708	0.39273	0.304785	0.0980088	0.0476493	0.0122656	0.00447424	0.00859562	0.00990523	0.0323187	0.0591172	0.0881532	0.119429	0.13688
afb1-3	tir1-1 afb1-3	0.0678201	0.026383	0.00102712	0.00119426	0.00330685	0.00693645	0.0131905	0.0119771	0.0151078	0.0324928	0.106103	0.506607	0.882331	0.838984	0.651843	0.662849
afb1-3	tir1afb345	0.273734	0.277836	0.555557	0.0530803	0.00265769	0.000152727	9.29084e-06	3.40659e-07	1.79515e-07	6.64137e-07	6.57719e-07	2.42883e-06	3.51661e-05	2.97044e-05	0.000106146	0.000731282
afb1-3	tir1afb1345	0.117528	0.0593608	0.00102195	0.0032544	3.18059e-05	5.47157e-06	5.00462e-07	2.21532e-07	5.29446e-07	1.3203e-06	5.46865e-06	2.36791e-05	9.08011e-05	0.000122724	0.000198365	0.000396728
afb1-3	afb1 AFB1-mCitrine#7	0.0181146	0.000371056	0.0253146	0.345528	0.363323	0.00440576	0.000226175	9.82614e-07	5.30085e-08	7.42508e-07	6.33038e-08	3.26276e-06	1.68883e-05	4.30122e-05	0.000139328	0.000174939
afb1-3	afb1 AFB1-mCitrine#5	0.883439	0.0429629	0.0128468	0.0402732	0.0545644	0.570341	0.823691	0.121879	0.0289522	0.0239909	0.0190596	0.0633253	0.0788565	0.0360103	0.099323	0.0867305
tir1-1	tir1-1 afb1-3	0.494165	0.0758094	0.0369595	0.0332377	0.0580355	0.163878	0.293803	0.455195	0.675402	0.750794	0.396765	0.141159	0.0883065	0.0695419	0.0533649	0.0627265
tir1-1	tir1afb345	0.869773	0.318845	0.684713	0.459832	0.111213	0.0430011	0.00461341	0.00196426	0.00238602	0.0074627	0.00487488	0.00202192	0.00564268	0.00514994	0.0137132	0.0205282
tir1-1	tir1afb1345	0.760165	0.146904	0.055447	0.0799878	0.00753582	0.00301096	0.000367892	0.000950874	0.00182708	0.00932234	0.00877421	0.00964723	0.00860736	0.00958465	0.0161047	0.00863693
tir1-1	afb1 AFB1-mCitrine#7	0.0121994	0.0036231	0.0157551	0.105676	0.679441	0.438852	0.0694633	0.00882462	0.000917005	0.00576412	0.000657541	0.00258534	0.00300089	0.00529393	0.0127172	0.00555345
tir1-1	afb1 AFB1-mCitrine#5	0.356031	0.0759015	0.00907314	0.0149148	0.0145854	0.0440032	0.113486	0.417915	0.631234	0.647669	0.787692	0.568156	0.74617	0.783078	0.871897	0.912473
tir1-1 afb1-3	tir1afb345	0.27301	0.002377	0.0029516	0.0743989	0.526591	0.812386	0.204382	0.0902034	0.060524	0.00552692	0.000761995	3.10669e-05	7.3578e-05	3.57872e-05	3.85636e-05	0.0003105
tir1-1 afb1-3	tir1afb1345	0.616685	0.670927	0.707646	0.581683	0.636919	0.237737	0.0536799	0.0554574	0.0376007	0.00672243	0.00152185	0.000218399	0.000165383	0.000115323	7.32125e-05	0.000174382
tir1-1 afb1-3	afb1 AFB1-mCitrine#7	0.000563808	5.60278e-06	3.32992e-06	6.50297e-05	0.0110021	0.339671	0.736903	0.222097	0.0368662	0.00427271	0.000108556	4.07775e-05	3.64868e-05	4.57447e-05	5.13144e-05	7.64264e-05
tir1-1 afb1-3	afb1 AFB1-mCitrine#5	0.0743253	0.000317089	1.76787e-06	6.95868e-06	8.96905e-05	0.0032102	0.027348	0.181908	0.445559	0.917574	0.548741	0.273509	0.119825	0.0293049	0.0389034	0.0366252
tir1afb345	tir1afb1345	0.502254	0.00537676	0.00317601	0.189595	0.168891	0.2111	0.361672	0.716161	0.662775	0.985673	0.927195	0.685835	0.925747	0.89682	0.896335	0.543034
tir1afb345	afb1 AFB1-mCitrine#7	0.000935387	0.00344528	0.00361377	0.00242438	0.0111729	0.0955128	0.201915	0.432937	0.743046	0.847264	0.428186	0.931771	0.830315	0.853778	0.835881	0.618532
tir1afb345	afb1 AFB1-mCitrine#5	0.280265	0.245851	0.00181395	0.000236998	3.42234e-05	8.51192e-05	8.522e-05	0.00036017	0.00134325	0.00176593	0.00222391	0.000119477	0.0013056	0.00516154	0.00253489	0.0160229
tir1afb1345	afb1 AFB1-mCitrine#7	0.000509865	8.12443e-06	9.11076e-07	0.000123251	0.000121082	0.00459022	0.0297302	0.25608	0.882262	0.83797	0.54422	0.745953	0.918415	0.968819	0.944649	0.871538
tir1afb1345	afb1 AFB1-mCitrine#5	0.130273	0.000677978	5.25182e-07	1.35776e-05	5.26563e-07	3.64448e-06	6.60975e-06	0.000178962	0.000981641	0.00235961	0.00449108	0.00113751	0.00271981	0.0113	0.00435401	0.00715581
afb1 AFB1-mCitrine#7	afb1 AFB1-mCitrine#5	0.0482662	0.120125	0.663939	0.128758	0.00619961	0.00212518	0.00161382	0.00155627	0.000562592	0.00139994	0.000280633	0.000164193	0.0006184	0.00573048	0.00311276	0.00382874

## Sheet: t-tests_Figure7sup1
Pairwise 2-tailed t-tests (unequal variance) p values for phenotypes measured in Figure 7—figure supplement 1. Green fill indicates p < 0.05.
Genotypes Compared		30min	60min	90min	120min	150min	180min	210min	240min	270min	300min	330min	360min	390min	420min	450min	480min
Col-0	afb1-3	0.465528	0.0453687	0.00931653	0.0380226	0.0459057	0.0700423	0.120482	0.736947	0.709832	0.106595	0.517184	0.191693	0.576526	0.296851	0.235282	0.388163
Col-0	tir1-1	0.0329941	0.038876	0.0130955	0.00188729	0.00025628	0.000157115	0.0709952	0.226248	0.608934	0.838401	0.975272	0.194471	0.882178	0.773012	0.415109	0.120582
Col-0	tir1-1 afb1-3	0.00192137	1.49925e-05	4.55274e-10	7.37909e-09	5.8322e-08	1.23485e-06	0.00740913	0.092196	0.993748	0.17392	0.324735	0.0568112	0.659804	0.465062	0.941966	0.949092
Col-0	tir1afb345	0.232087	0.381493	0.000429363	3.98704e-06	4.86259e-06	2.62648e-09	4.93304e-07	3.68211e-11	2.57117e-09	2.5037e-10	5.38717e-09	2.24943e-08	4.66338e-09	2.76561e-07	8.61536e-08	1.20237e-08
Col-0	tir1afb1345	0.00680612	2.21945e-06	8.81178e-13	7.76111e-14	5.91589e-15	1.17882e-15	5.68717e-13	7.83165e-11	3.5432e-08	2.29463e-06	1.26729e-06	5.30725e-05	2.19089e-07	4.0496e-05	4.27006e-06	2.10288e-05
Col-0	afb1-3 AFB1-mCitrine#5	0.248695	0.372061	8.31073e-05	1.21883e-06	0.0374145	0.00726407	0.0786082	0.661791	0.489964	0.751412	1.91034e-05	4.34129e-07	1.27406e-06	0.000590891	0.0296903	0.0665543
Col-0	afb1-3 AFB1-mCitrine#7	0.9625	0.457263	0.614467	0.456559	0.000489297	9.40597e-06	2.79404e-07	5.92414e-16	4.24246e-11	3.02807e-12	9.4807e-16	2.71424e-11	6.37949e-13	1.059e-09	2.11104e-10	8.54857e-10
afb1-3	tir1-1	0.285938	0.991159	0.644879	0.437647	0.341448	0.324238	0.985915	0.626997	0.422615	0.195214	0.545665	0.854256	0.673464	0.196103	0.0542552	0.0380476
afb1-3	tir1-1 afb1-3	0.0626716	0.0219196	0.00320814	0.00149389	0.00710292	0.0239022	0.466974	0.330443	0.733503	0.805693	0.813984	0.624903	0.904083	0.674924	0.236417	0.384241
afb1-3	tir1afb345	0.855636	0.239028	0.863938	0.121446	0.118954	0.00947291	0.0212198	1.31896e-05	1.34815e-07	2.33358e-09	7.10208e-07	9.52573e-08	1.03096e-06	9.25976e-07	7.86275e-08	3.28703e-07
afb1-3	tir1afb1345	0.162797	0.00744304	0.000269644	1.64235e-05	2.70135e-06	5.1205e-06	4.48642e-06	3.21803e-07	2.13768e-07	2.15277e-07	3.52434e-06	8.76416e-06	1.05462e-06	1.39326e-05	4.7282e-07	1.34677e-05
afb1-3	afb1-3 AFB1-mCitrine#5	0.0893193	0.00293186	3.8849e-07	2.26766e-07	0.000602425	0.00095972	0.007728	0.543573	0.915296	0.132571	0.000295582	8.97315e-07	9.31094e-05	0.000281653	0.00246626	0.0225265
afb1-3	afb1-3 AFB1-mCitrine#7	0.407209	0.00627733	0.00295414	0.00782915	0.705902	0.342339	0.0471141	4.15848e-07	4.10838e-09	2.72138e-11	1.80718e-11	2.20434e-10	5.42342e-10	1.32059e-08	2.04836e-10	1.87854e-08
tir1-1	tir1-1 afb1-3	0.323799	0.0178146	9.21054e-05	0.0086407	0.0214913	0.0820271	0.400737	0.488339	0.633643	0.292093	0.355107	0.464007	0.763677	0.303535	0.500746	0.17293
tir1-1	tir1afb345	0.222942	0.22319	0.44069	0.472829	0.446143	0.0242704	0.00644606	2.62179e-08	4.77739e-08	8.6146e-09	1.37816e-08	5.15407e-10	1.21608e-08	3.286e-07	3.43597e-07	3.49955e-06
tir1-1	tir1afb1345	0.761592	0.00517511	1.21331e-06	5.55017e-05	1.44915e-07	2.78441e-07	8.46942e-08	5.12085e-09	3.19319e-07	4.73049e-06	1.7184e-06	2.22251e-06	2.54079e-07	6.56286e-05	2.37035e-05	0.000877537
tir1-1	afb1-3 AFB1-mCitrine#5	0.00061963	0.00189877	5.86246e-09	8.44434e-11	1.83498e-08	4.10944e-09	0.00117903	0.0810366	0.198705	0.972896	4.42311e-05	9.3867e-09	3.47343e-06	0.00095349	0.140954	0.832799
tir1-1	afb1-3 AFB1-mCitrine#7	0.0139353	0.00463506	0.00332761	0.000153932	0.347082	0.844294	0.0150894	2.35936e-12	7.21792e-10	6.13841e-11	2.36185e-15	7.17177e-13	1.28395e-12	1.02077e-09	8.84899e-10	1.7232e-07
tir1-1 afb1-3	tir1afb345	0.0185268	0.000336607	0.000273045	0.0142461	0.0757144	0.861703	0.0753467	3.2097e-05	2.64997e-08	5.04862e-10	1.2342e-08	7.8169e-10	1.86496e-07	2.35729e-08	8.26695e-07	1.1851e-07
tir1-1 afb1-3	tir1afb1345	0.396136	0.708795	0.357459	0.178719	0.00301865	0.0021855	4.38756e-06	8.12683e-07	1.31909e-07	2.73617e-07	4.15774e-07	7.00794e-07	5.55072e-07	6.14523e-06	1.11441e-05	4.77926e-05
tir1-1 afb1-3	afb1-3 AFB1-mCitrine#5	7.34318e-06	1.83038e-08	4.22394e-20	6.22035e-18	1.33434e-12	1.60466e-10	5.01198e-05	0.0364371	0.5561	0.218195	1.86912e-05	1.11244e-08	3.21013e-05	6.28783e-05	0.0540242	0.108168
tir1-1 afb1-3	afb1-3 AFB1-mCitrine#7	0.000326929	2.43961e-07	2.01577e-11	8.78541e-11	0.00050602	0.0323621	0.17087	1.29714e-07	4.47984e-10	4.12203e-12	1.30388e-14	1.05002e-12	2.95761e-11	8.76872e-11	1.57189e-09	6.19474e-09
tir1afb345	tir1afb1345	0.0683478	5.58675e-05	1.35146e-06	1.01659e-05	3.72378e-07	0.000566975	0.000326997	0.0648593	0.569308	0.986813	0.662939	0.694689	0.351714	0.977201	0.411137	0.923733
tir1afb345	afb1-3 AFB1-mCitrine#5	0.00864643	0.0654096	2.7545e-13	7.11036e-18	1.39619e-11	1.68786e-15	1.37855e-11	3.04997e-13	2.07075e-13	2.08365e-12	0.00592138	0.349133	0.0232625	0.0159085	9.75143e-05	2.55557e-06
tir1afb345	afb1-3 AFB1-mCitrine#7	0.145447	0.101895	5.61703e-05	1.41922e-08	0.0453124	0.00318021	0.434671	0.156109	0.201348	0.0875523	0.0004076	0.0221966	0.00624966	0.110922	0.0126379	0.201285
tir1afb1345	afb1-3 AFB1-mCitrine#5	1.7222e-05	7.09332e-10	2.82512e-26	7.07328e-26	1.15364e-21	3.08237e-21	1.87331e-16	1.33921e-11	3.78182e-10	5.29409e-07	0.0145647	0.767927	0.0111901	0.07147	0.000756605	0.00105318
tir1afb1345	afb1-3 AFB1-mCitrine#7	0.00101366	1.98174e-08	1.14208e-14	1.11958e-17	7.37516e-12	1.31774e-09	5.80445e-06	0.359131	0.599891	0.185757	0.0172771	0.029497	0.19042	0.196781	0.270099	0.290931
afb1-3 AFB1-mCitrine#5	afb1-3 AFB1-mCitrine#7	0.199695	0.916783	0.000451342	2.97694e-06	1.24081e-09	2.11714e-13	8.25922e-15	4.7196e-20	1.72575e-14	1.0826e-13	2.05398e-09	0.00185296	2.72346e-06	0.000126352	1.45156e-07	1.40546e-07
