# Supplementary figures and images for: Genetic analysis of the Arabidopsis TIR1/AFB auxin receptors reveals both overlapping and specialized functions
Source: eLife journal article supplement (doi:10.7554/elife.54740), 2020-02-17

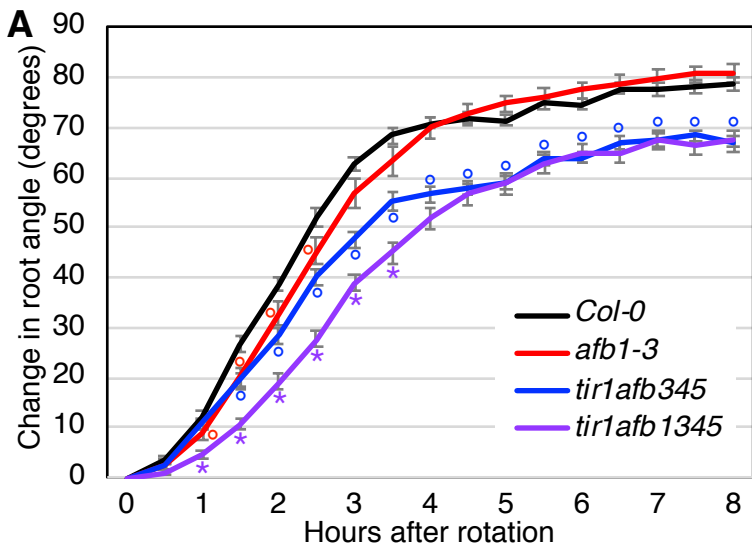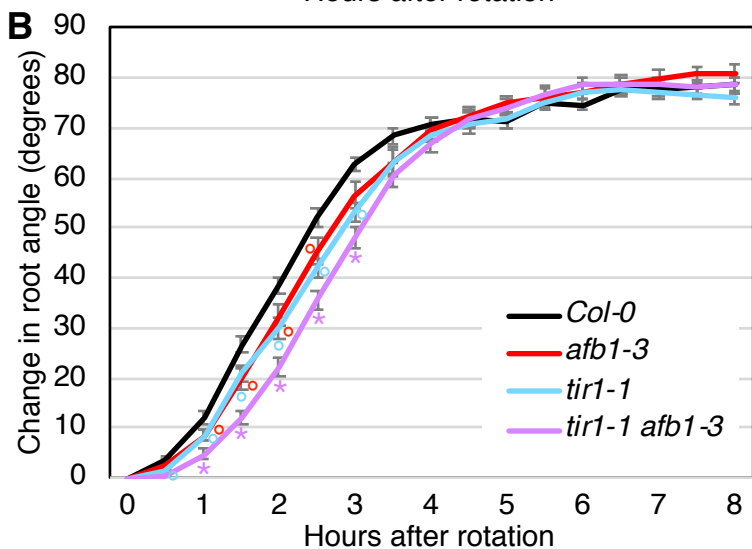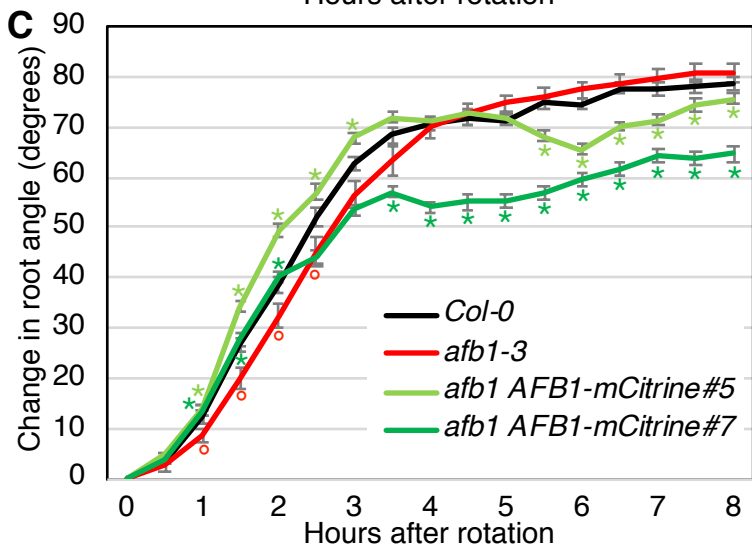

Supplement: supp [file elife-54740-supp-v1.zip]

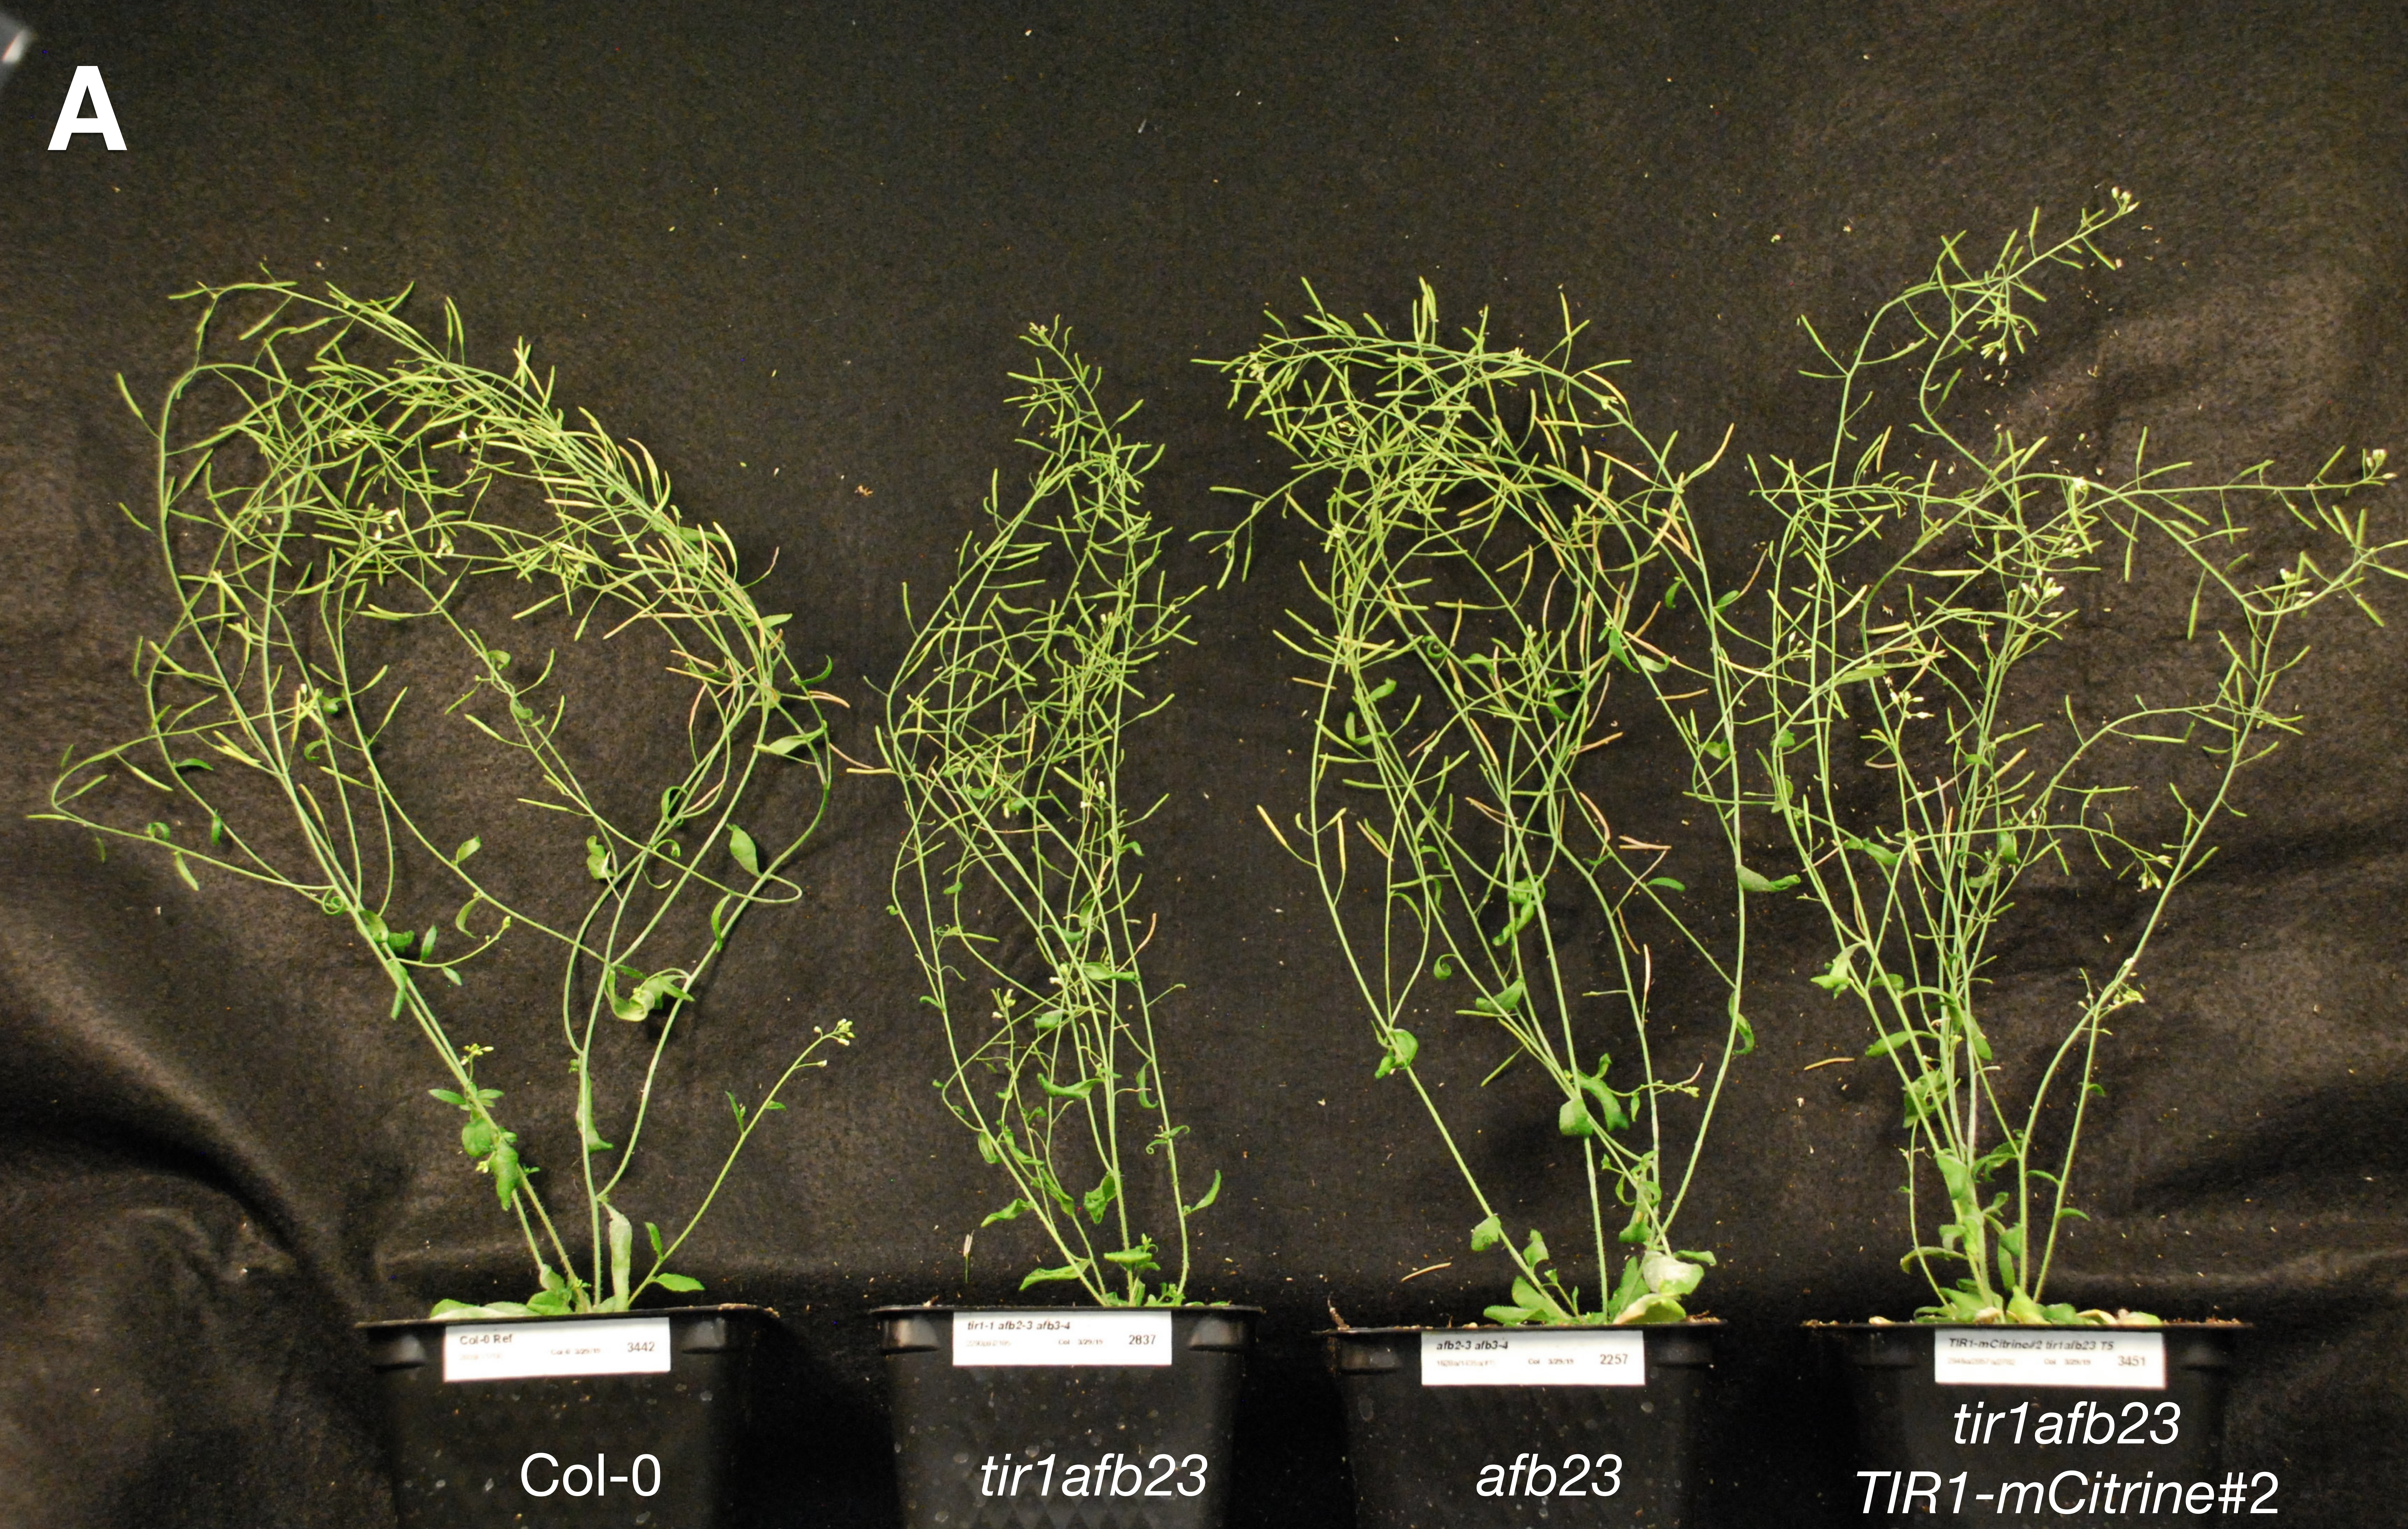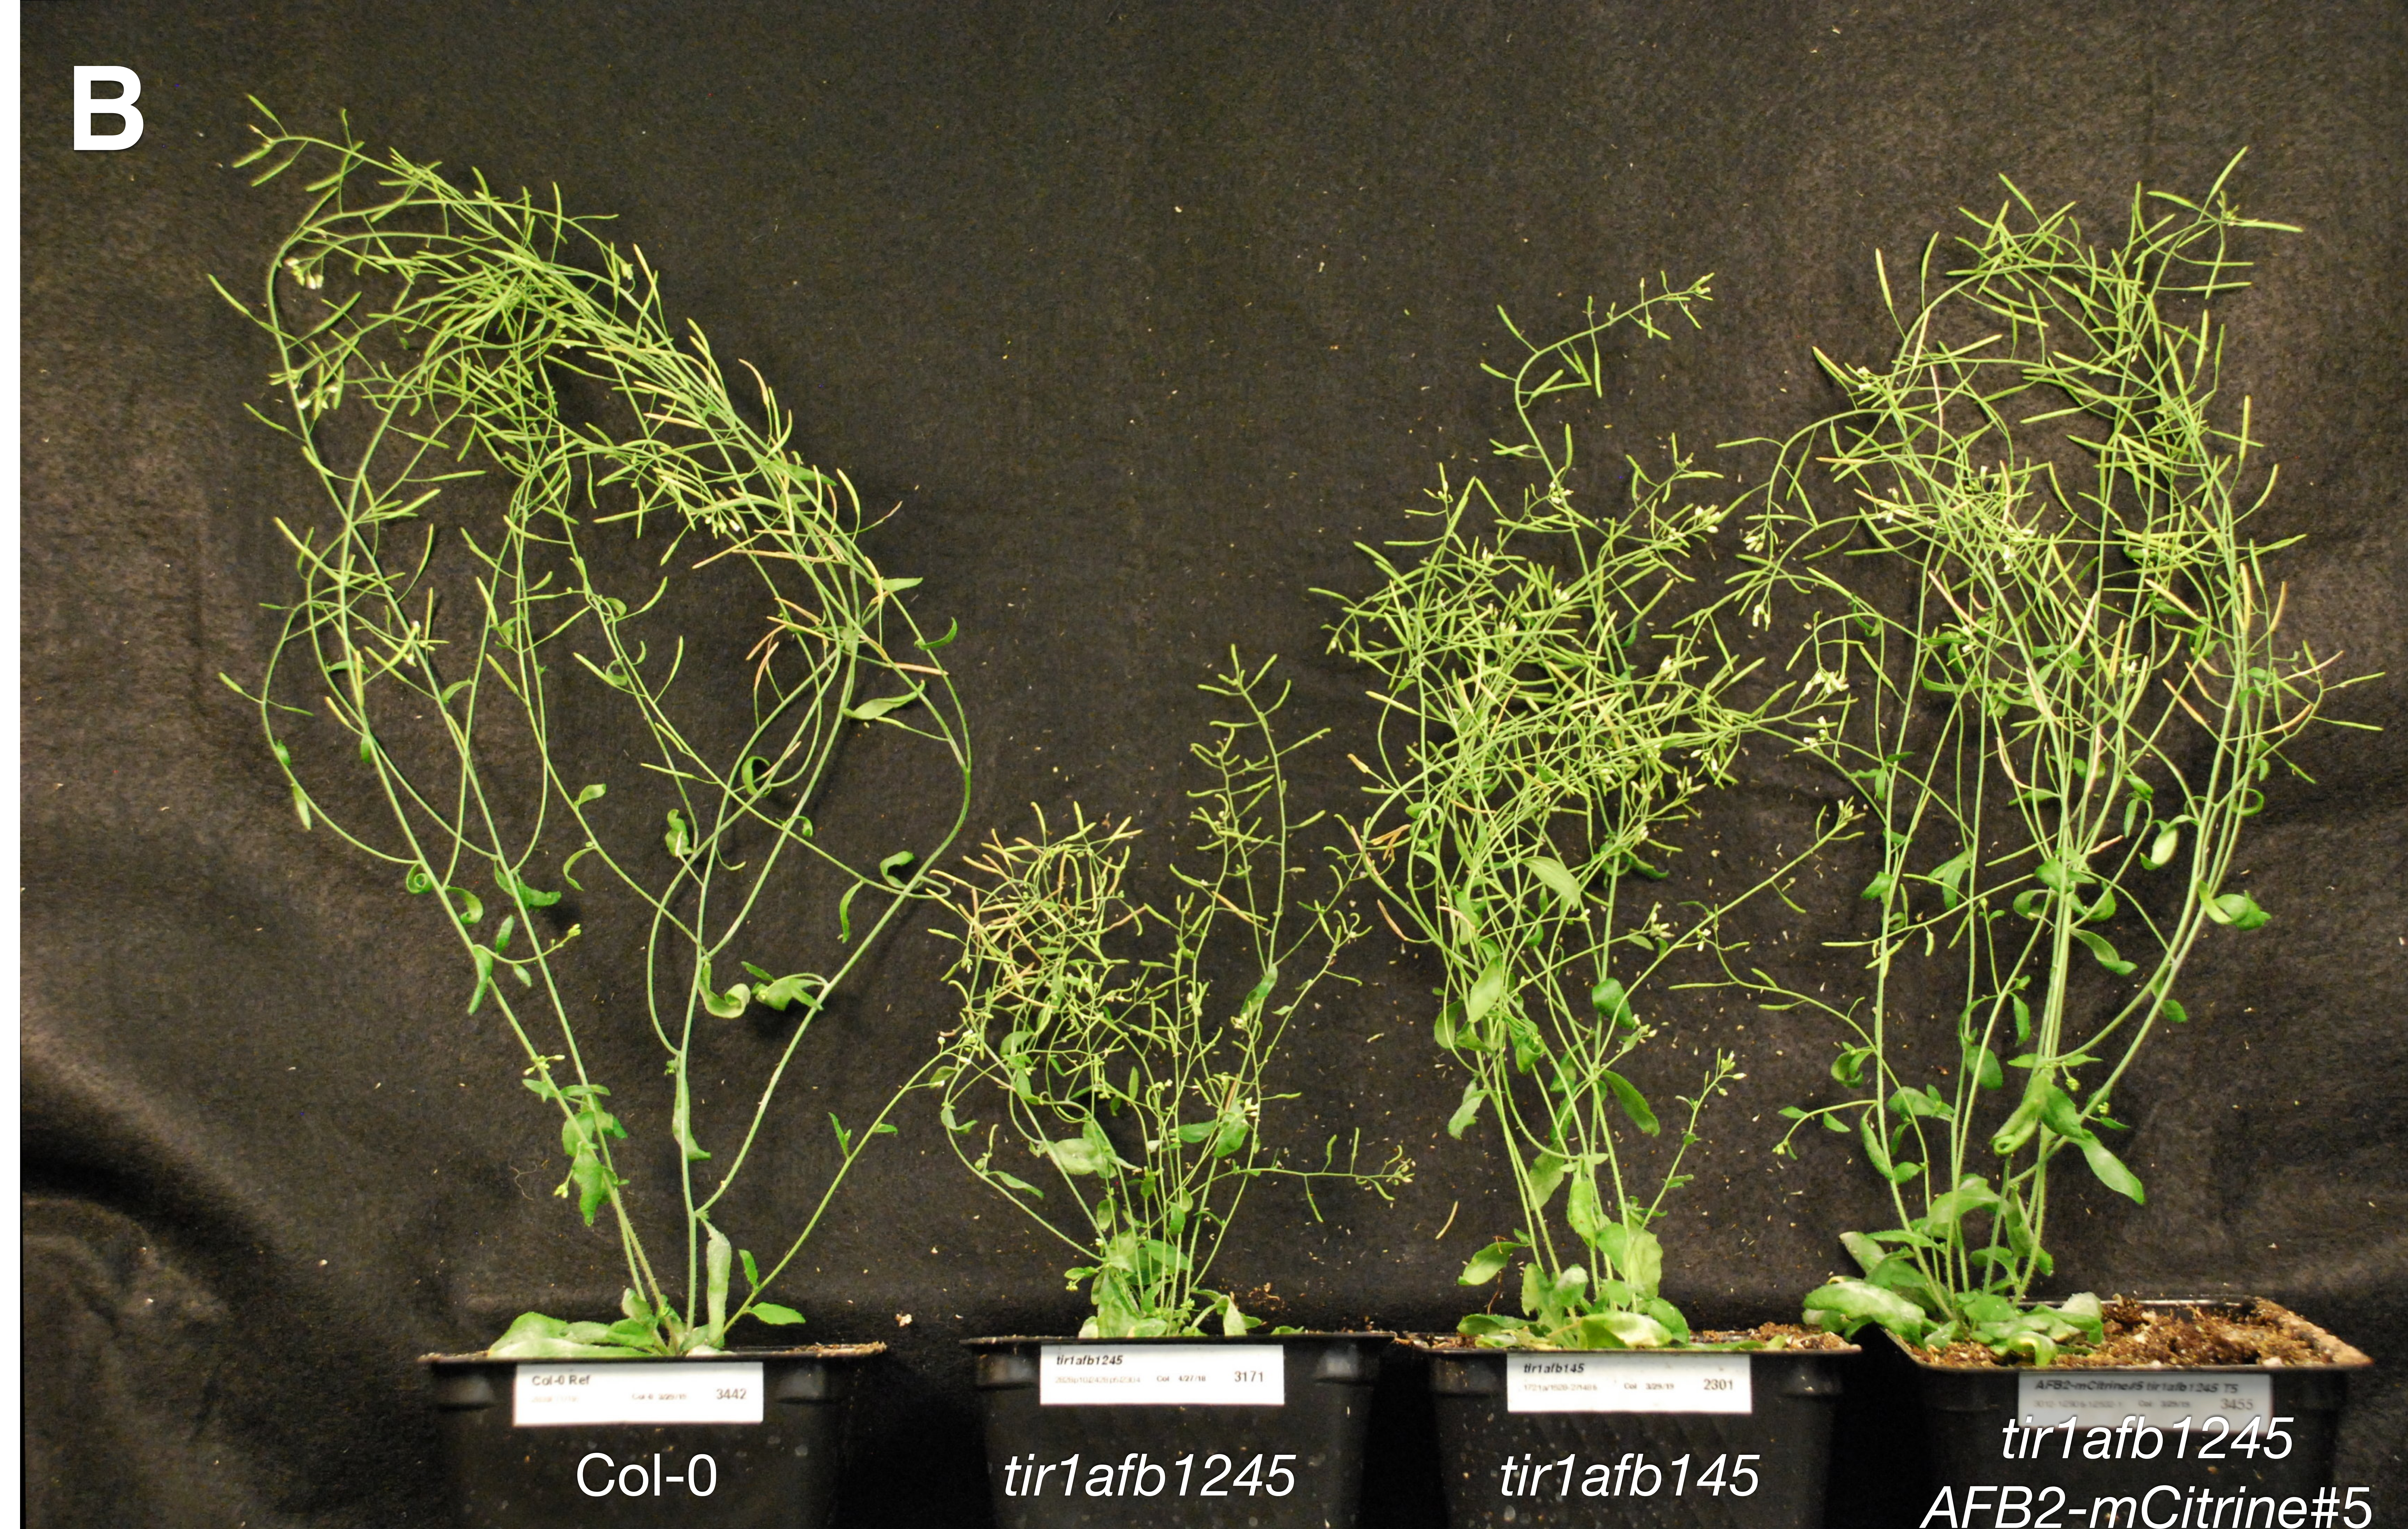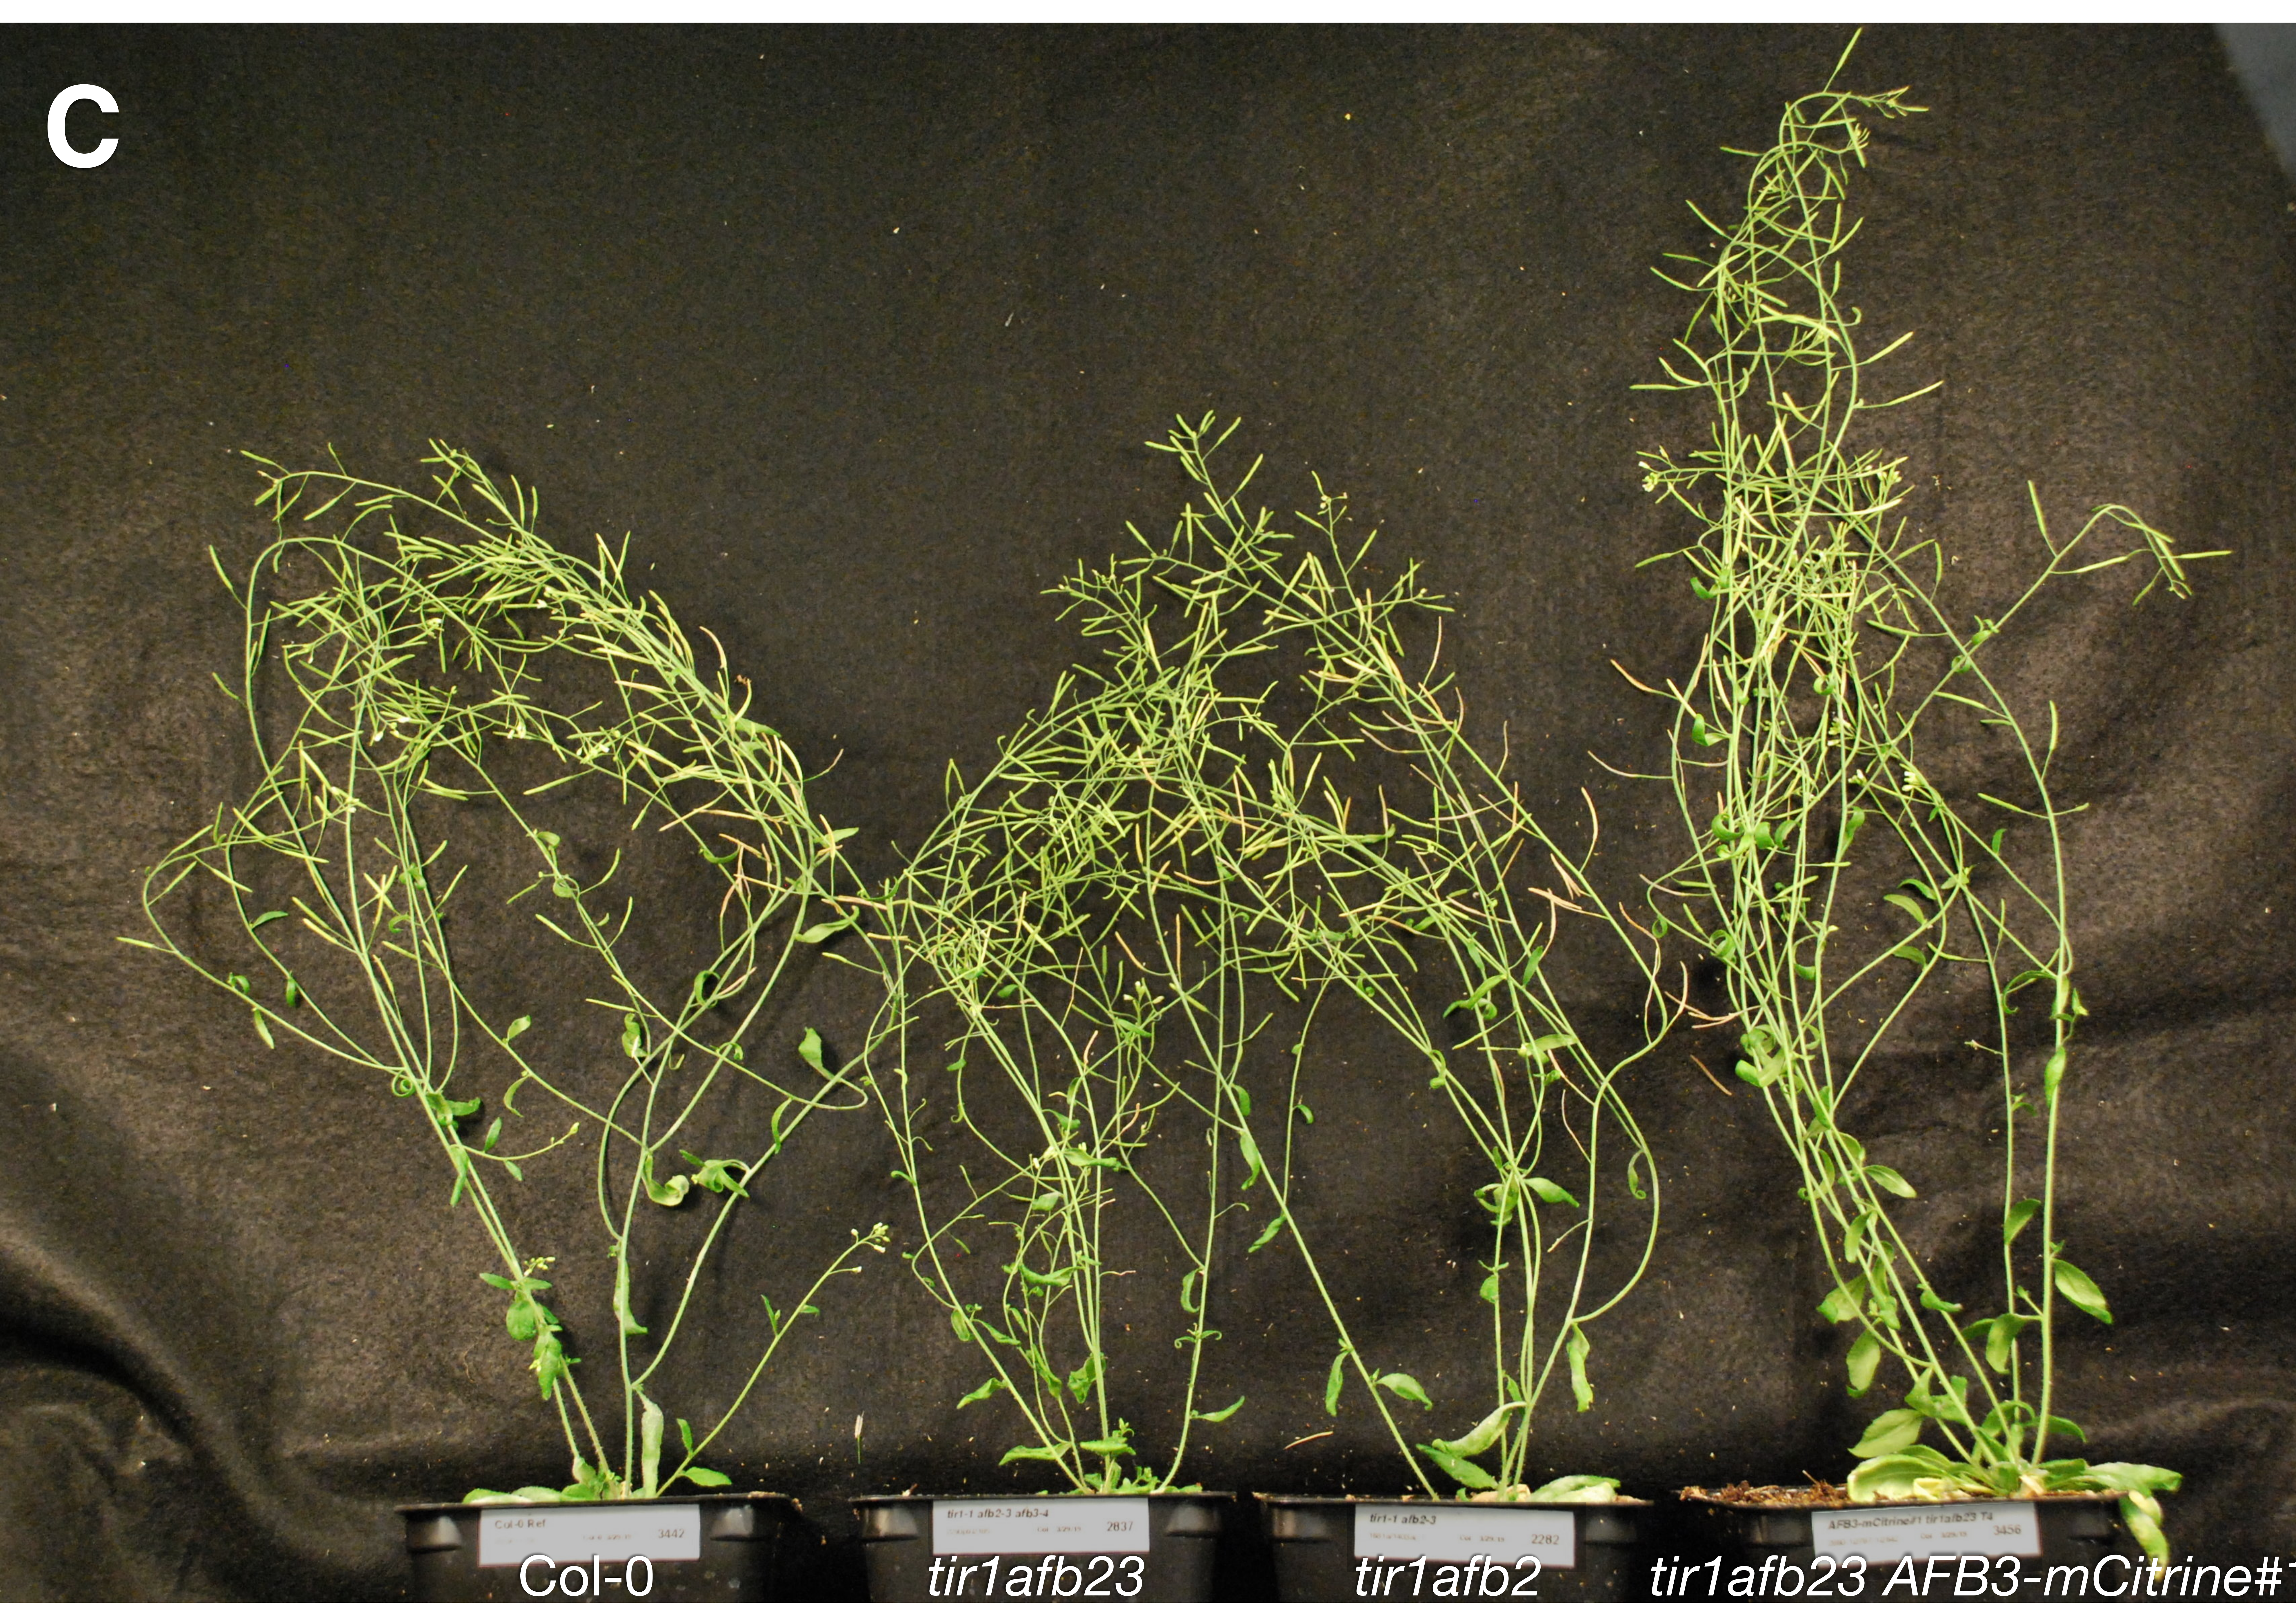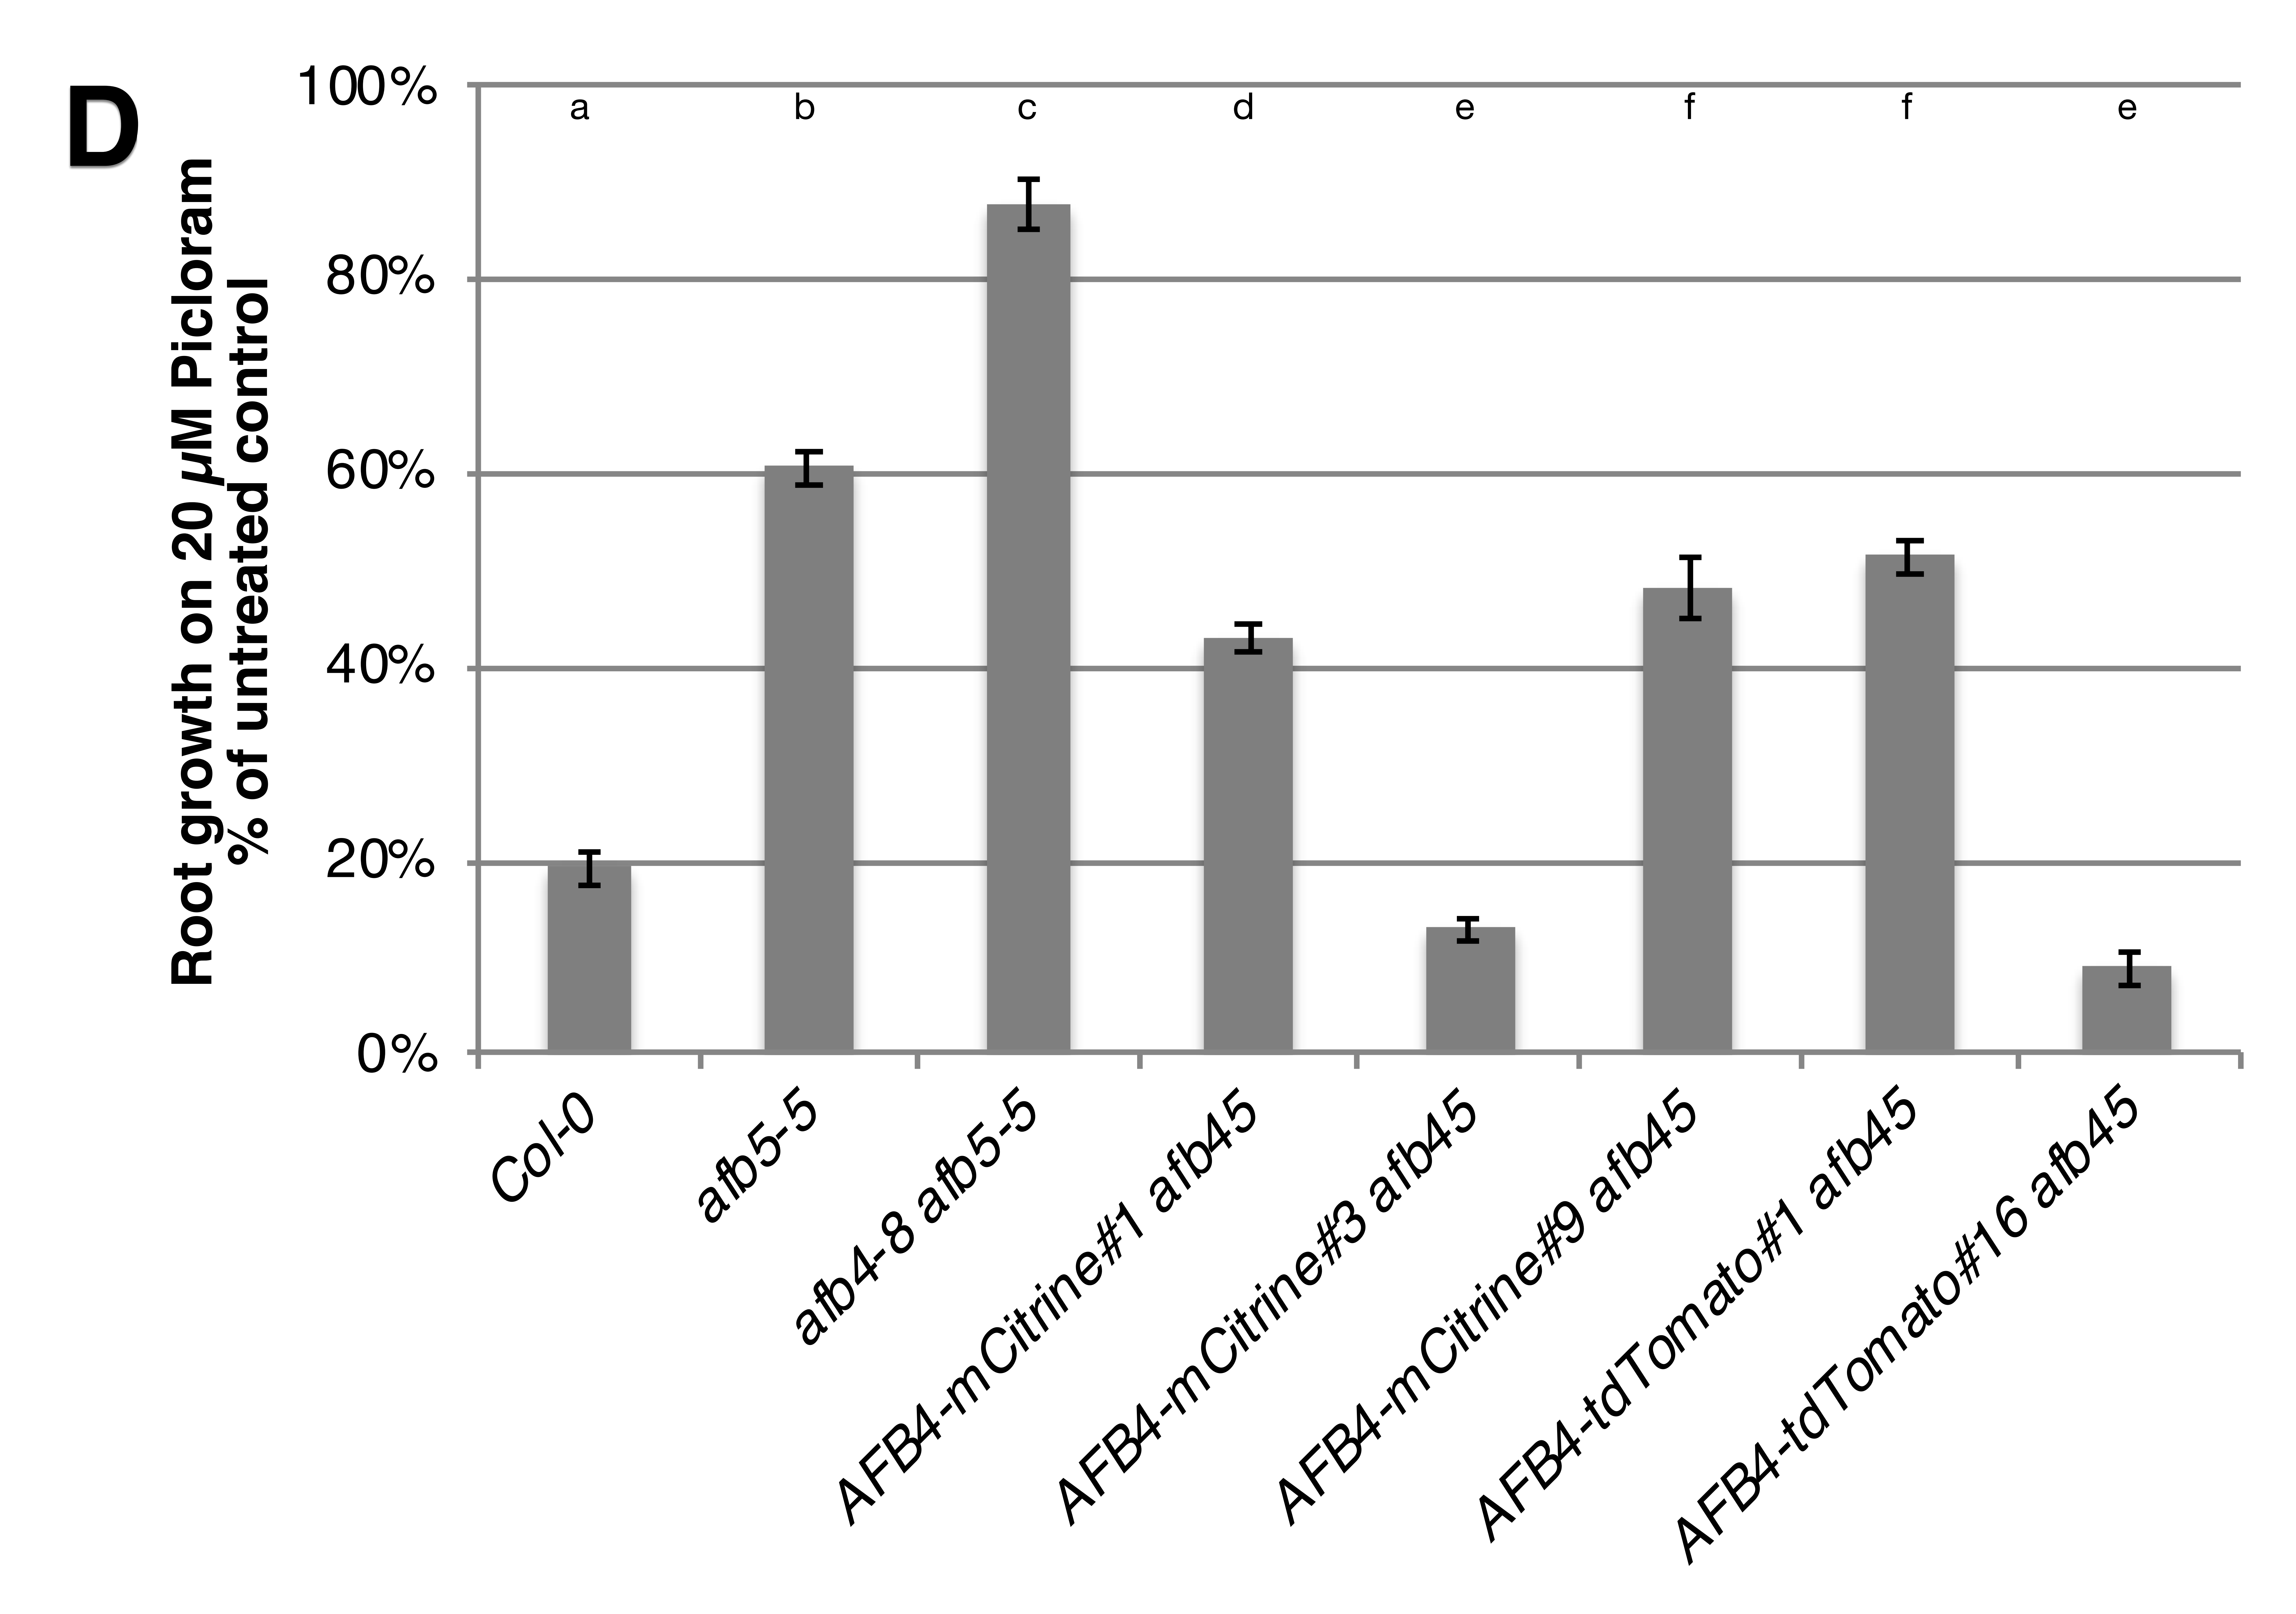

Supplement: supp [file elife-54740-supp-v1.zip]

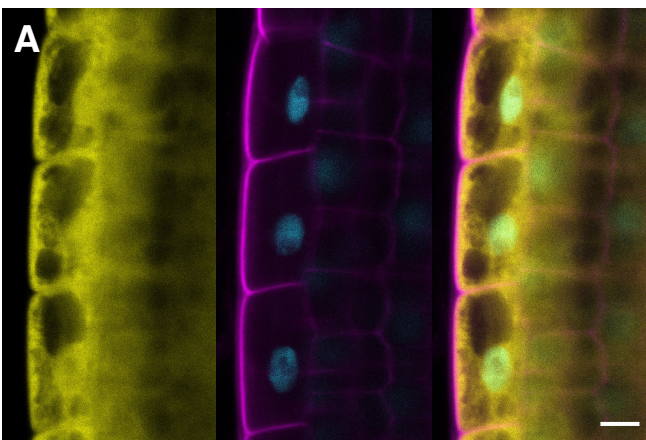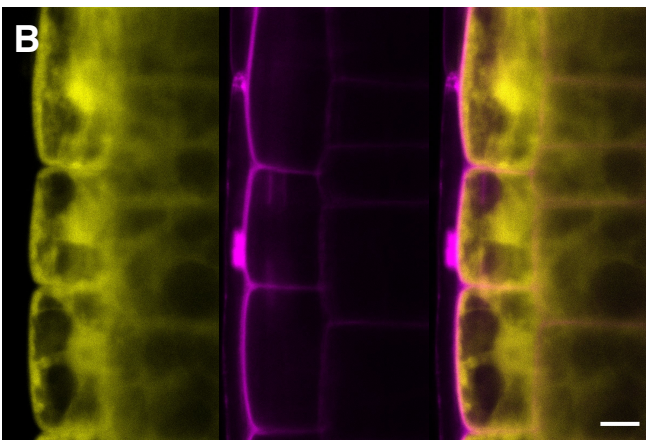

Supplement: supp [file elife-54740-supp-v1.zip]

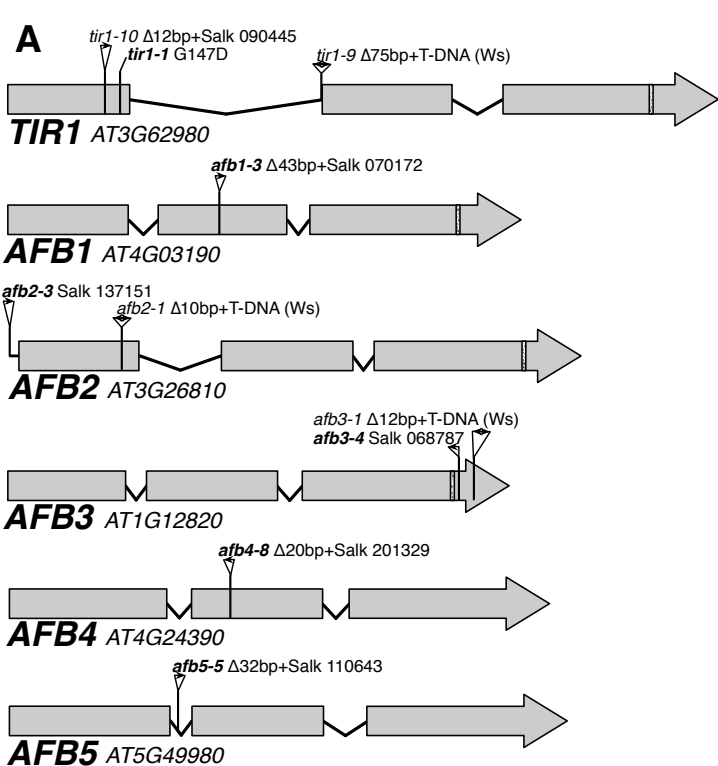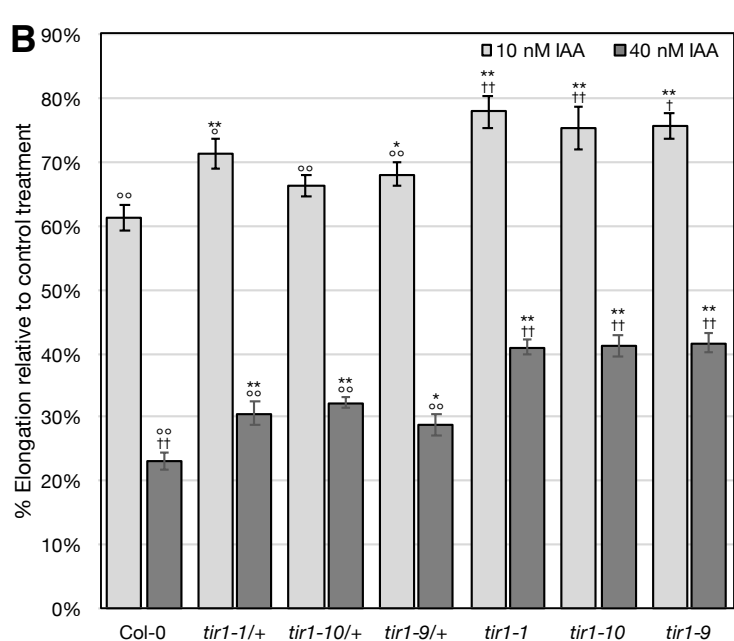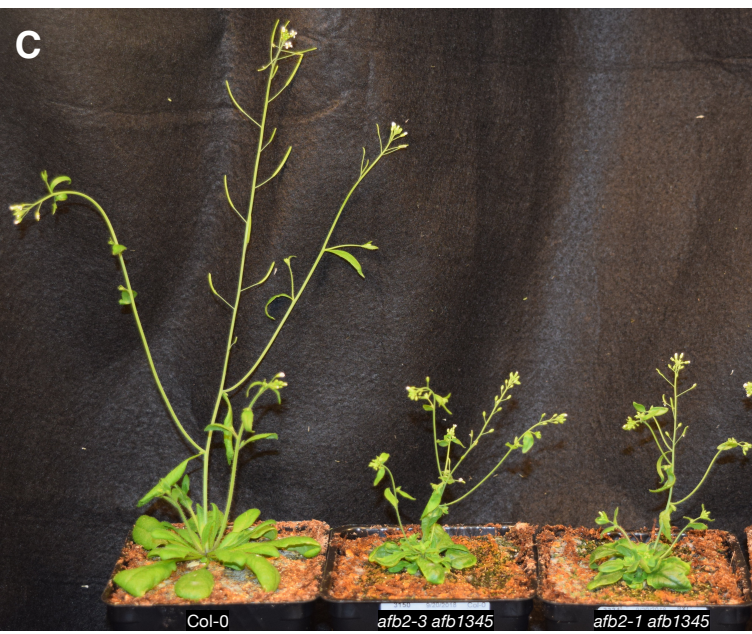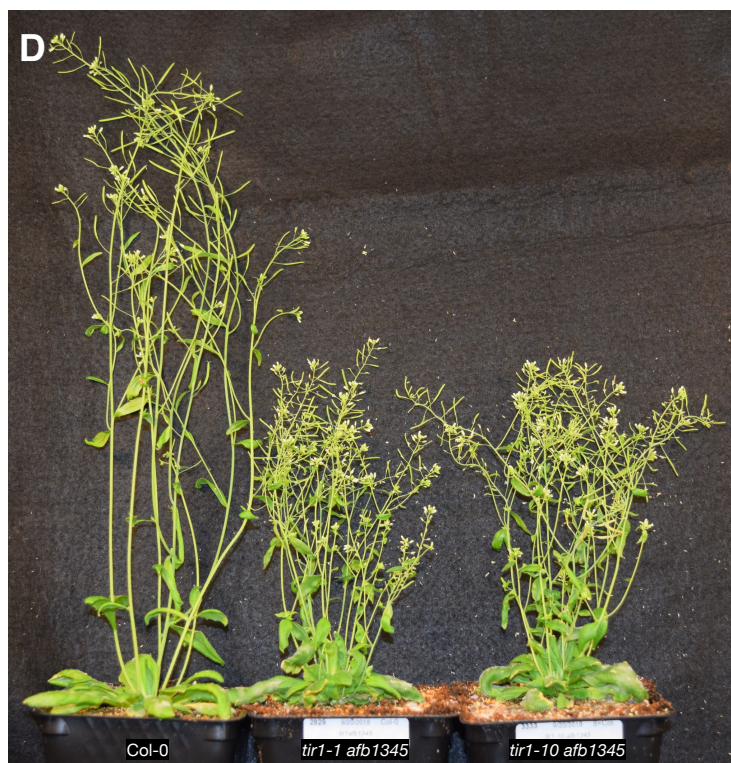

Supplement: supp [file elife-54740-supp-v1.zip]

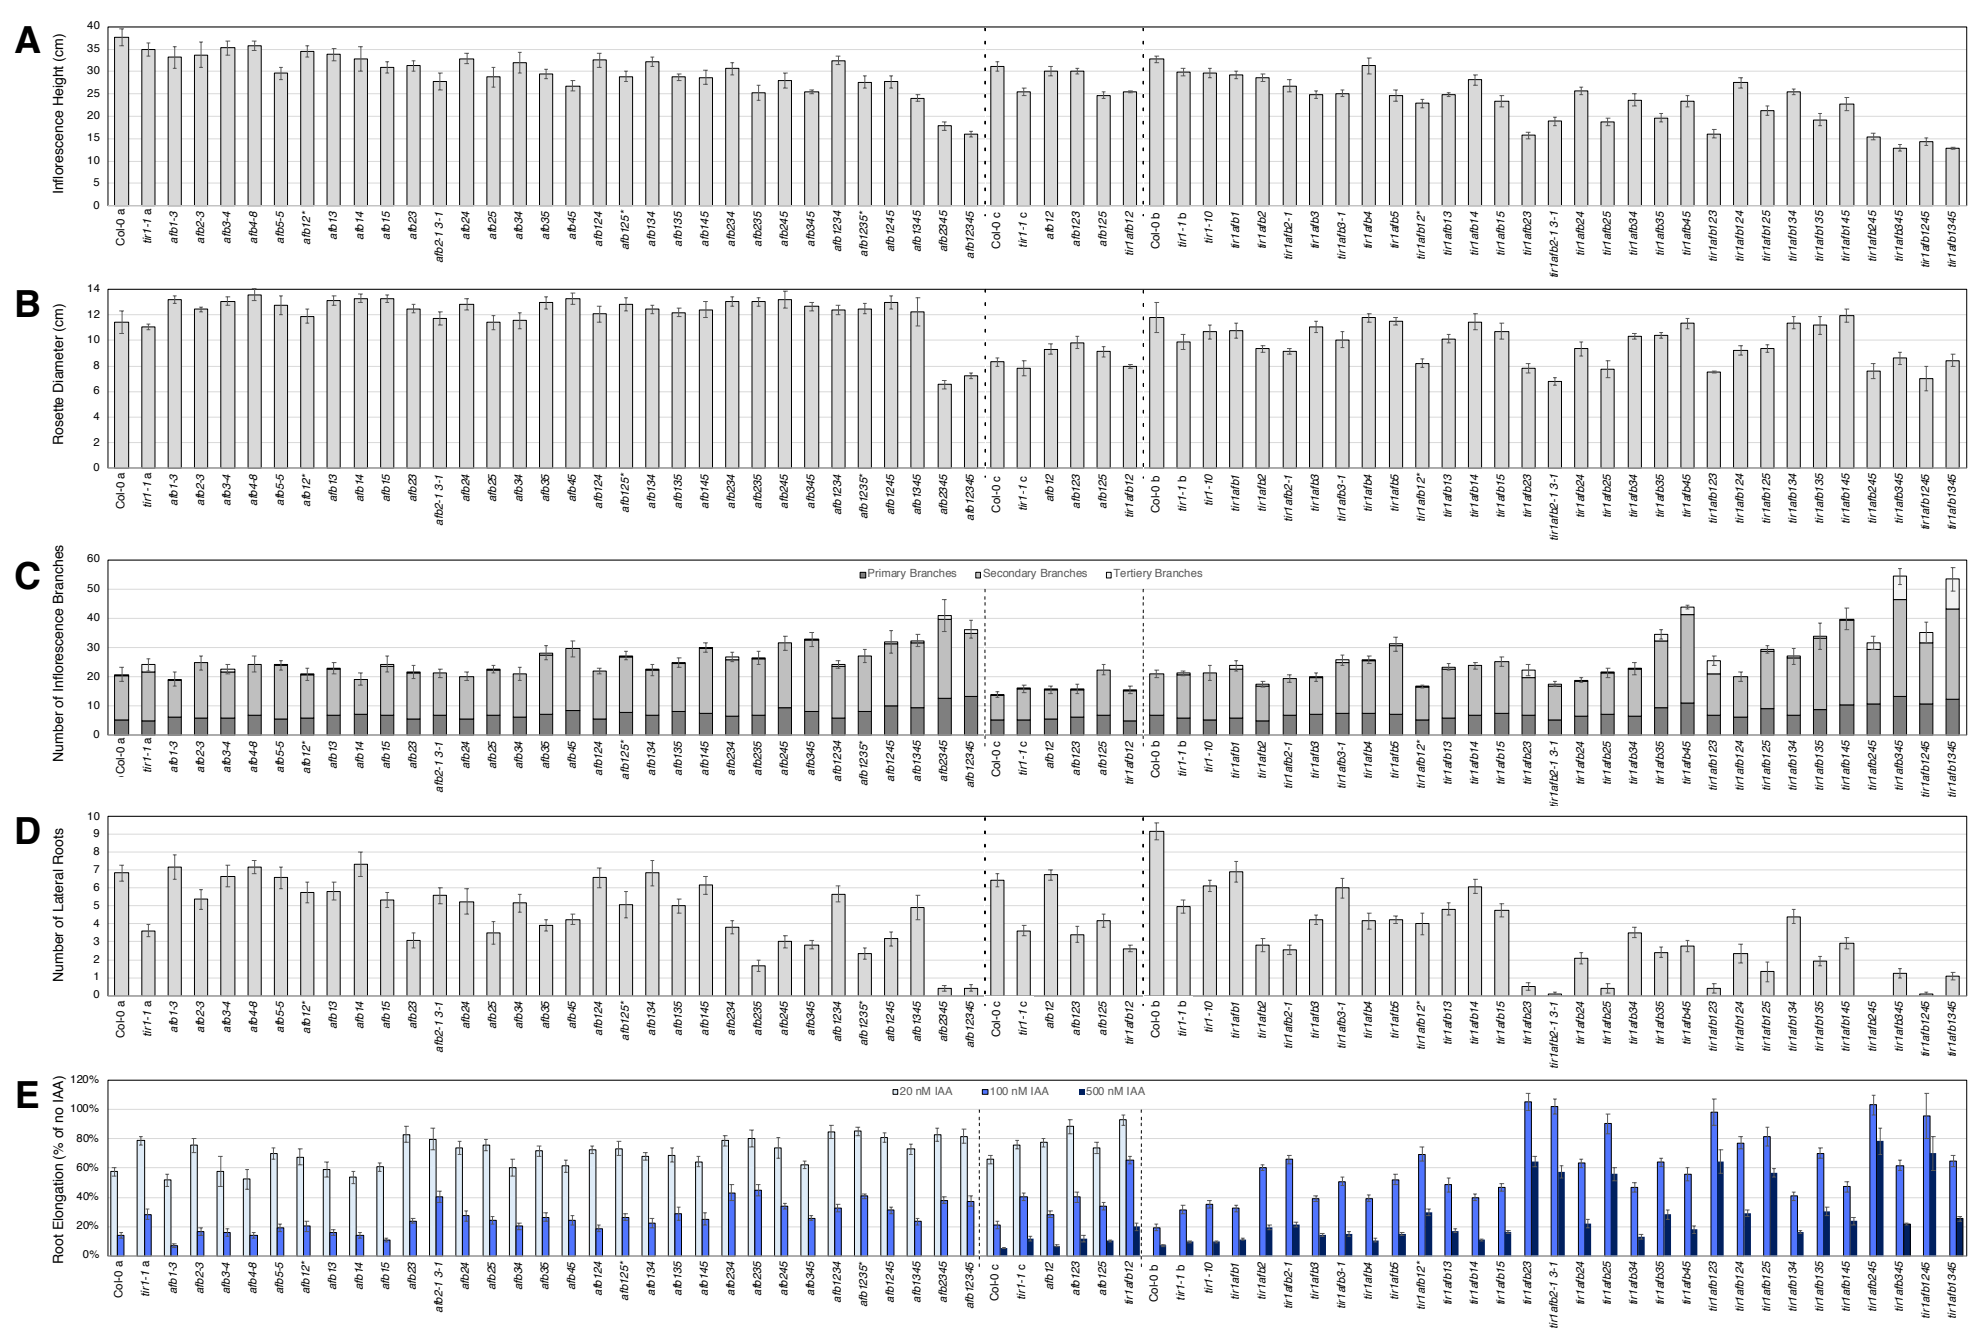

Supplement: supp [file elife-54740-supp-v1.zip]

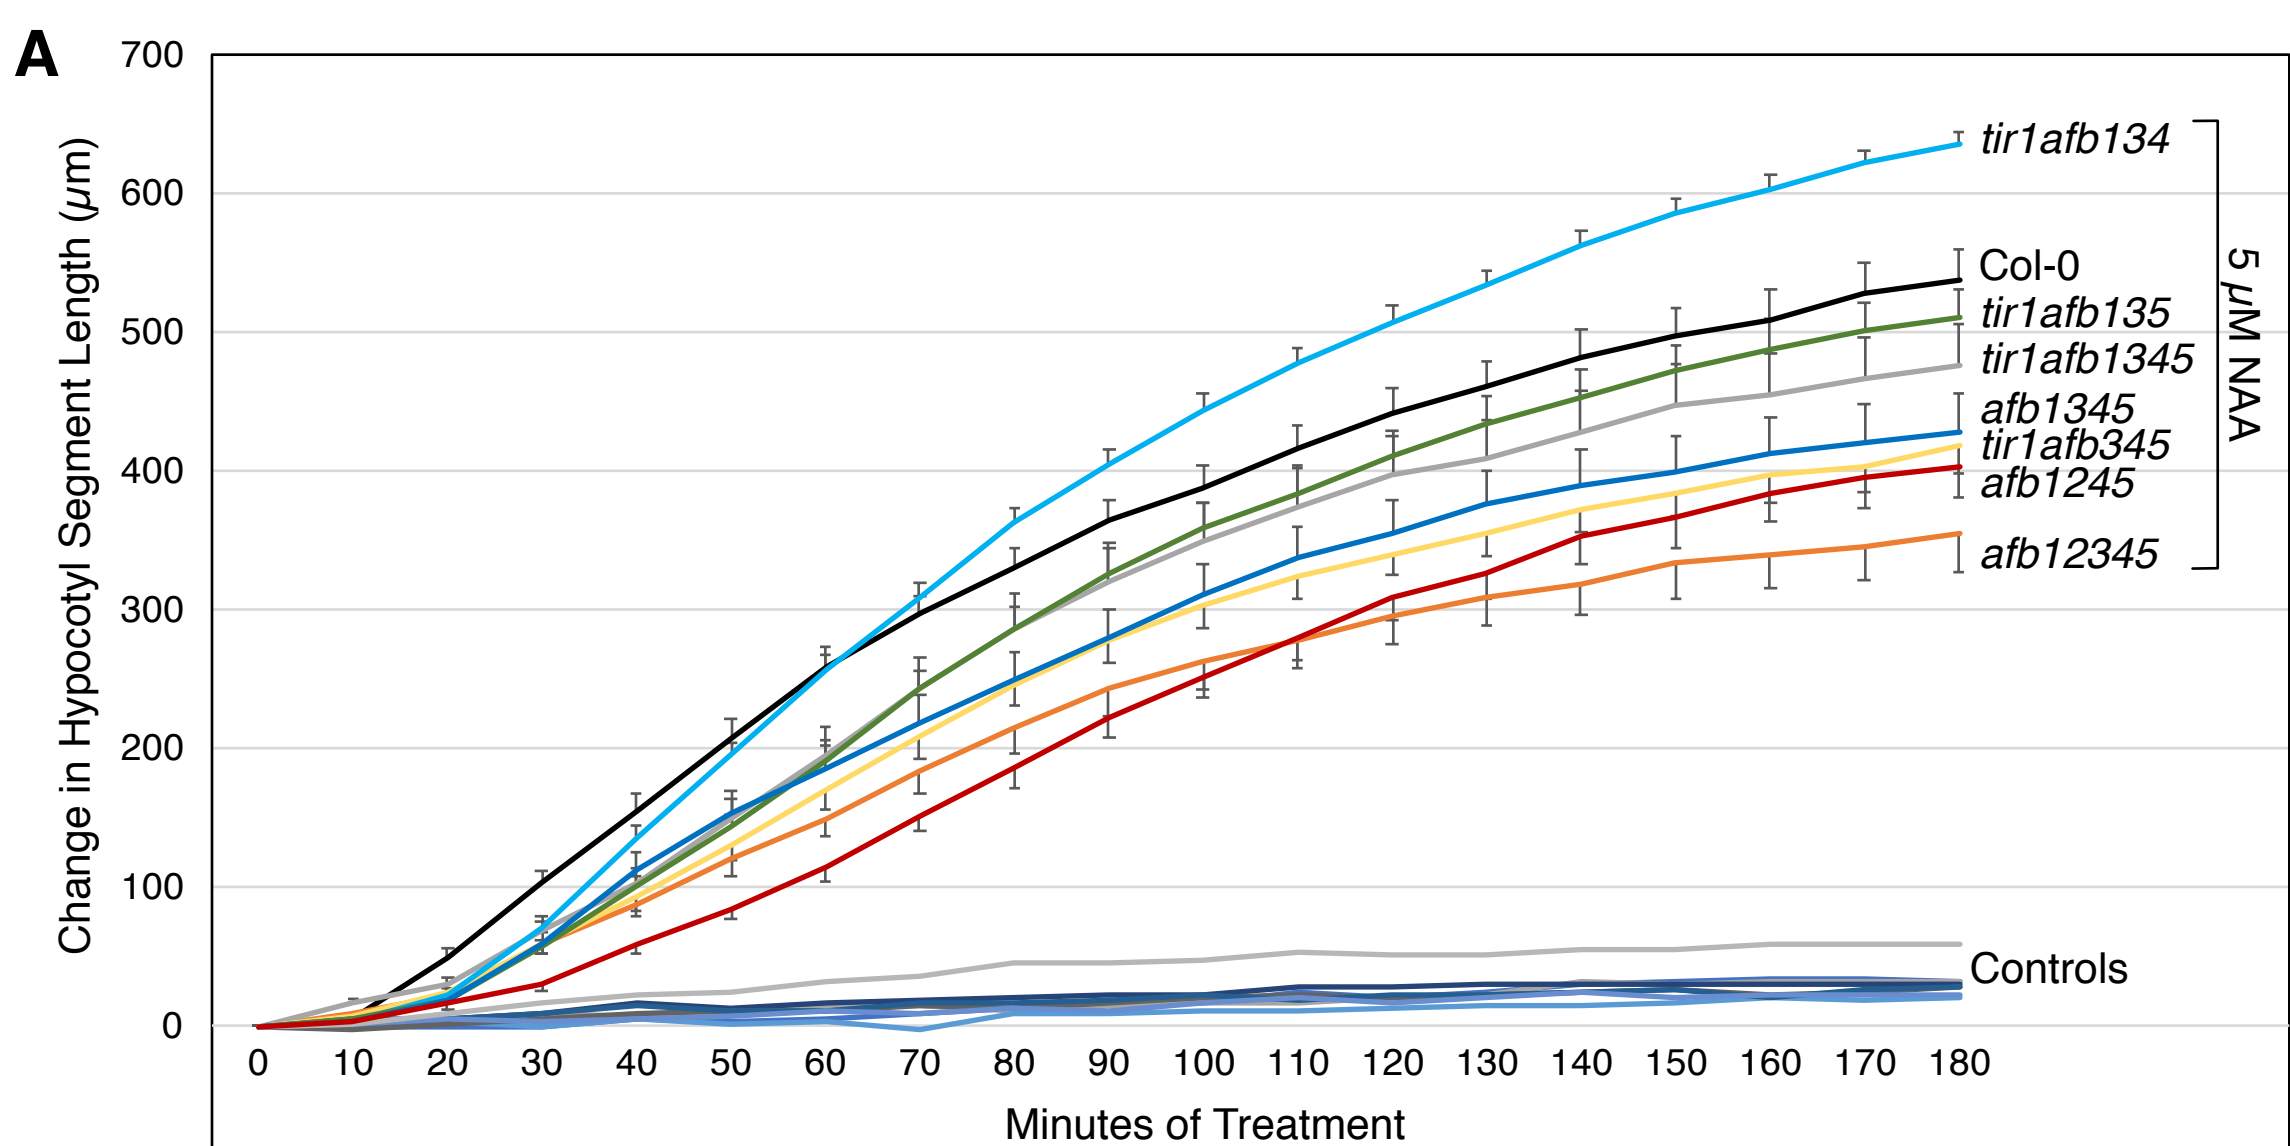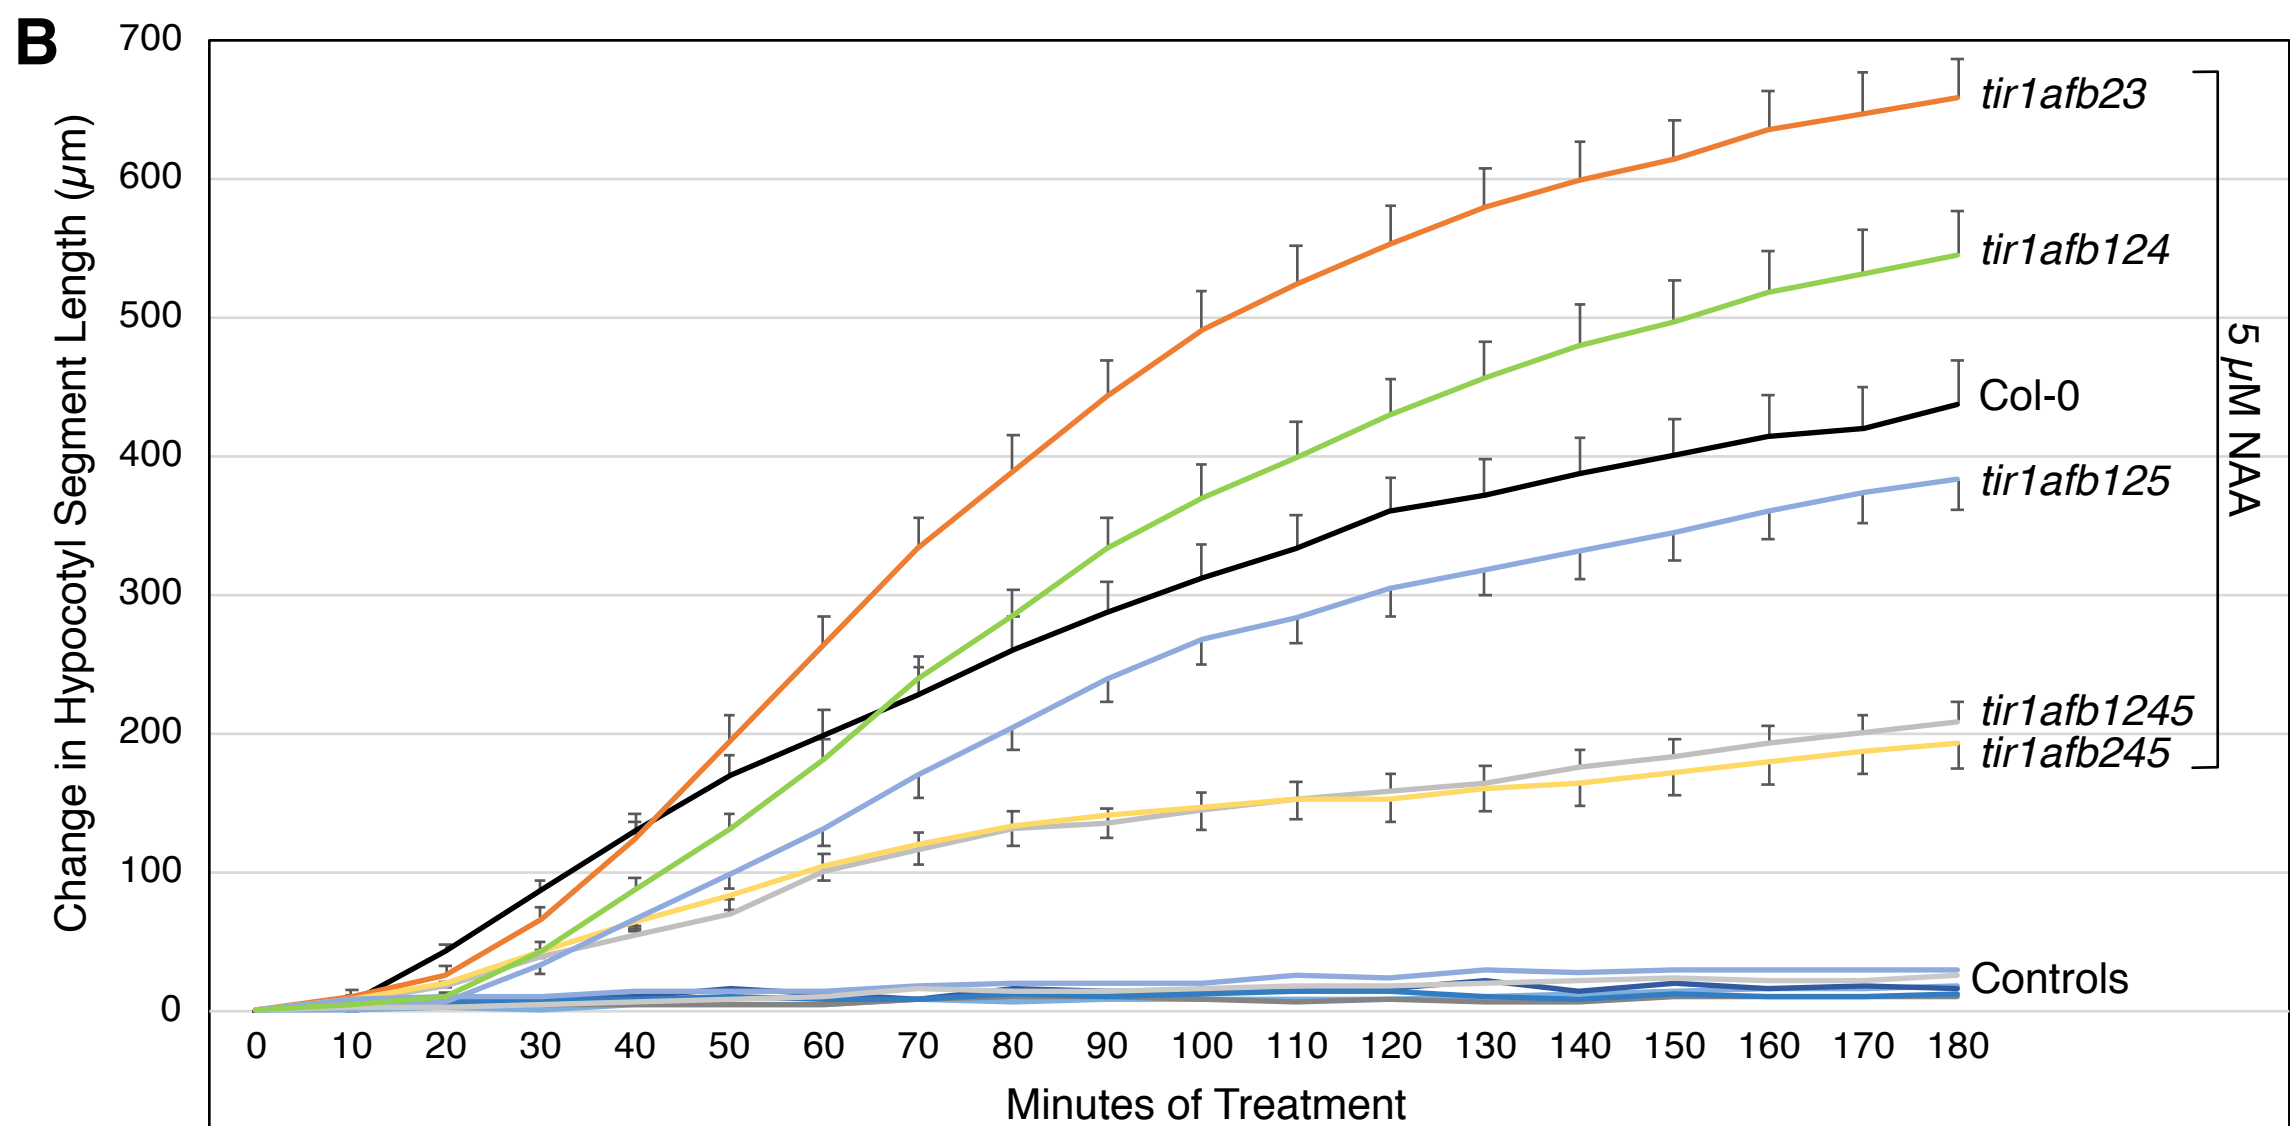

Supplement: supp [file elife-54740-supp-v1.zip]

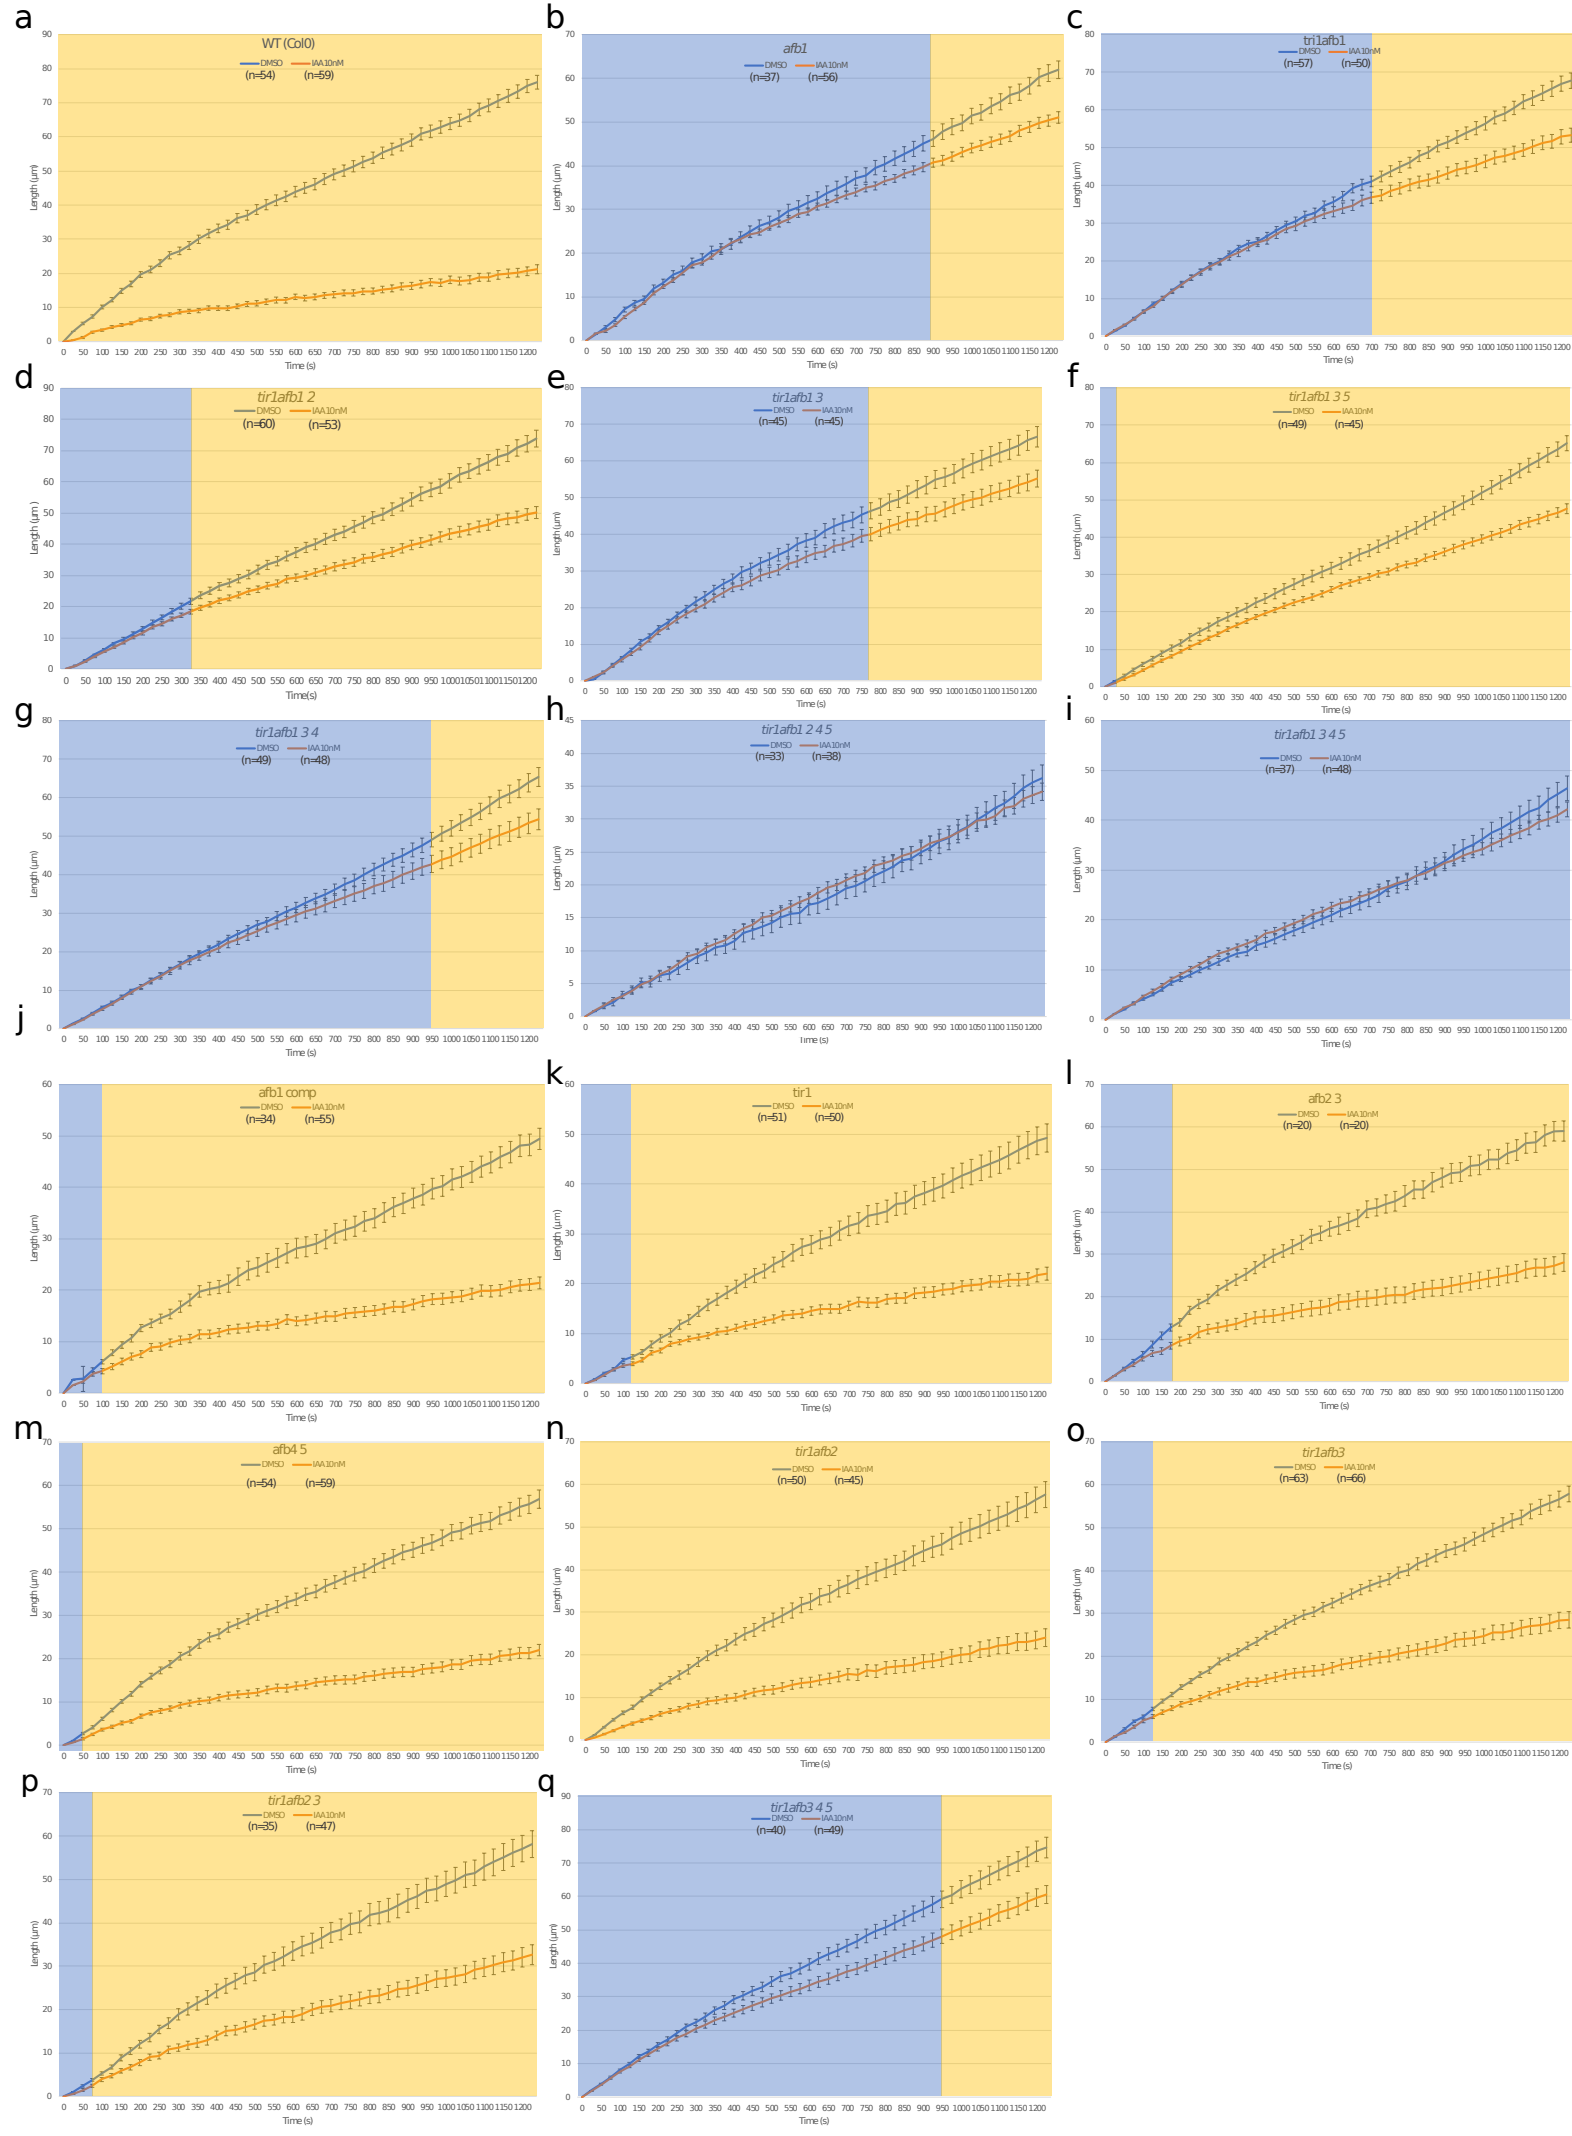

Supplement: supp [file elife-54740-supp-v1.zip]

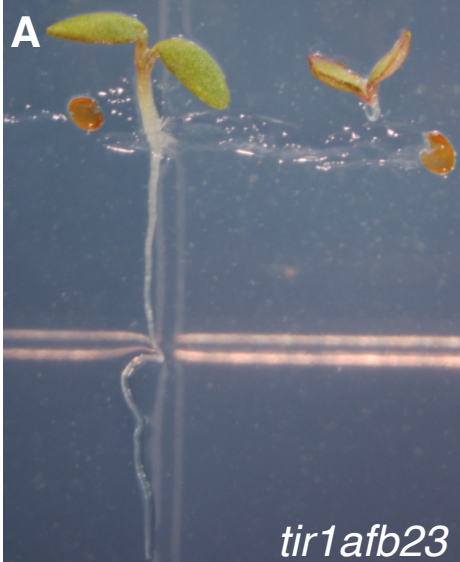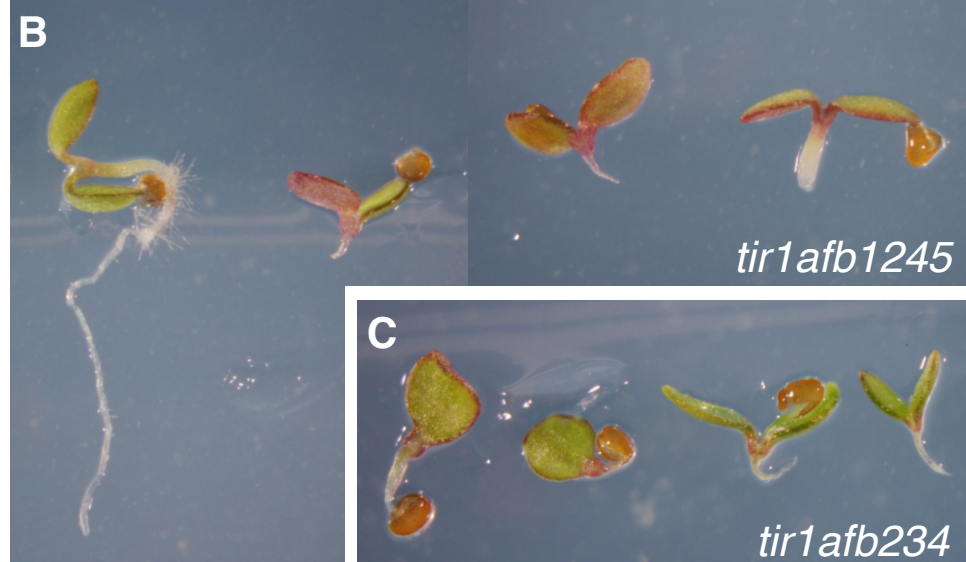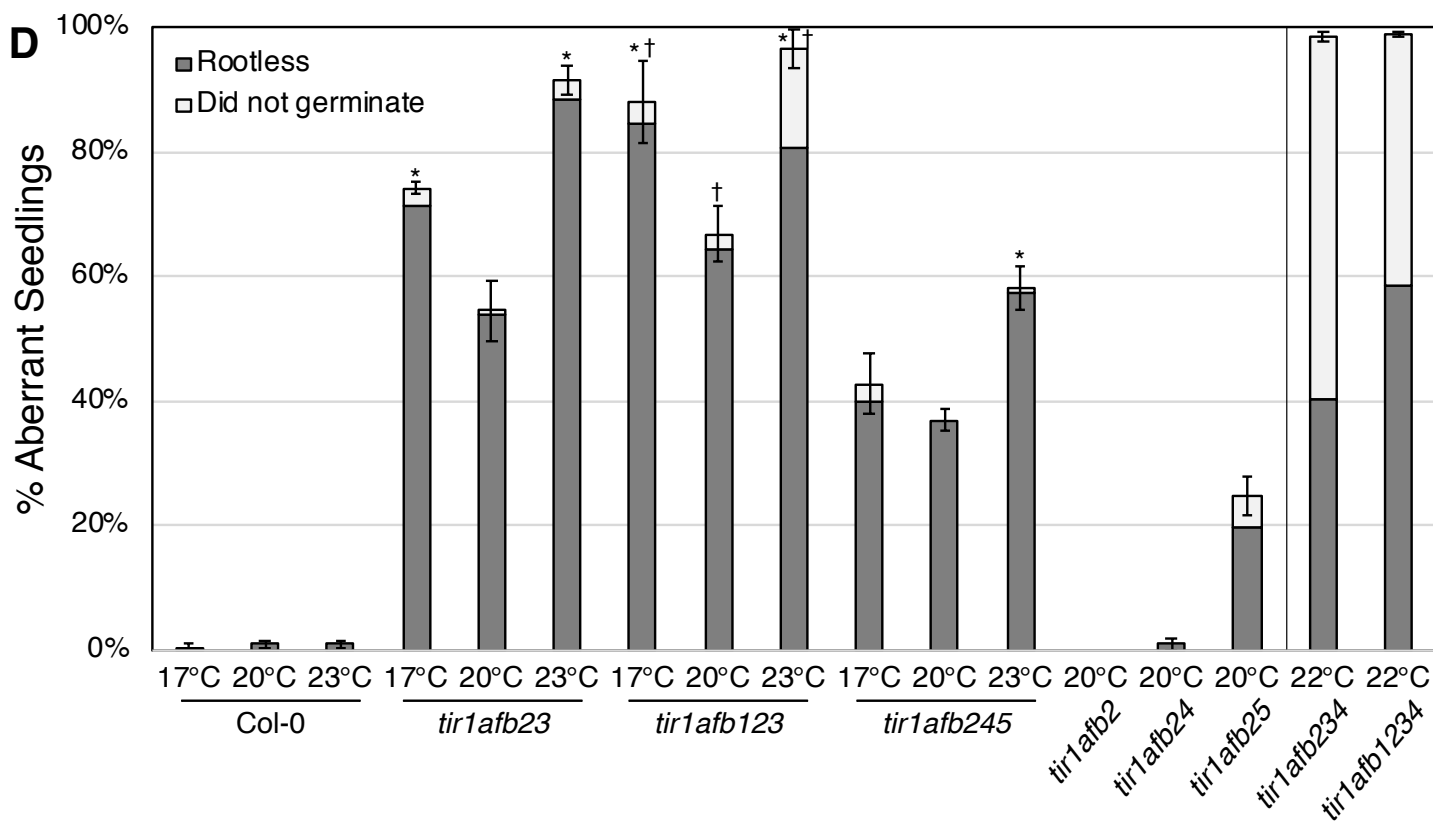

Supplement: supp [file elife-54740-supp-v1.zip]

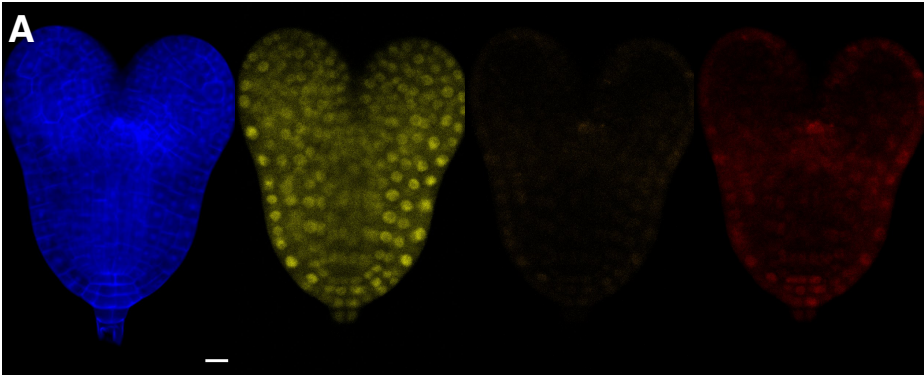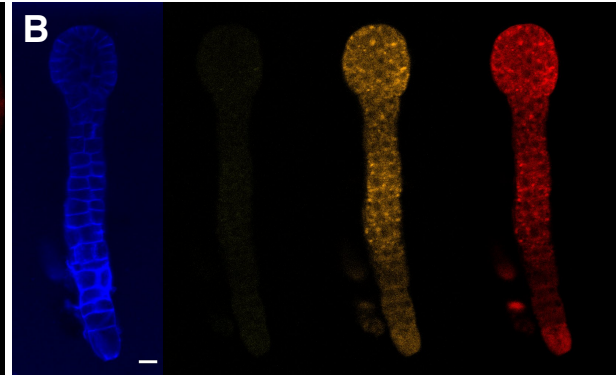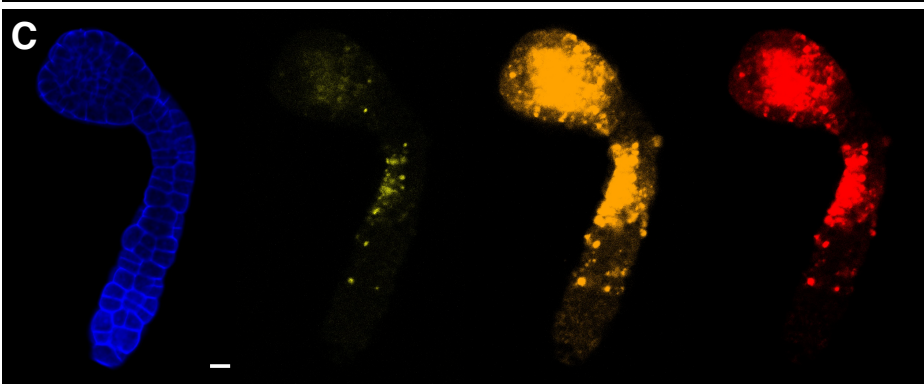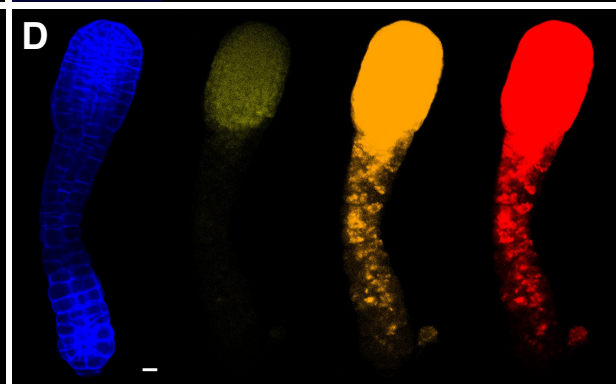

Supplement: supp [file elife-54740-supp-v1.zip]

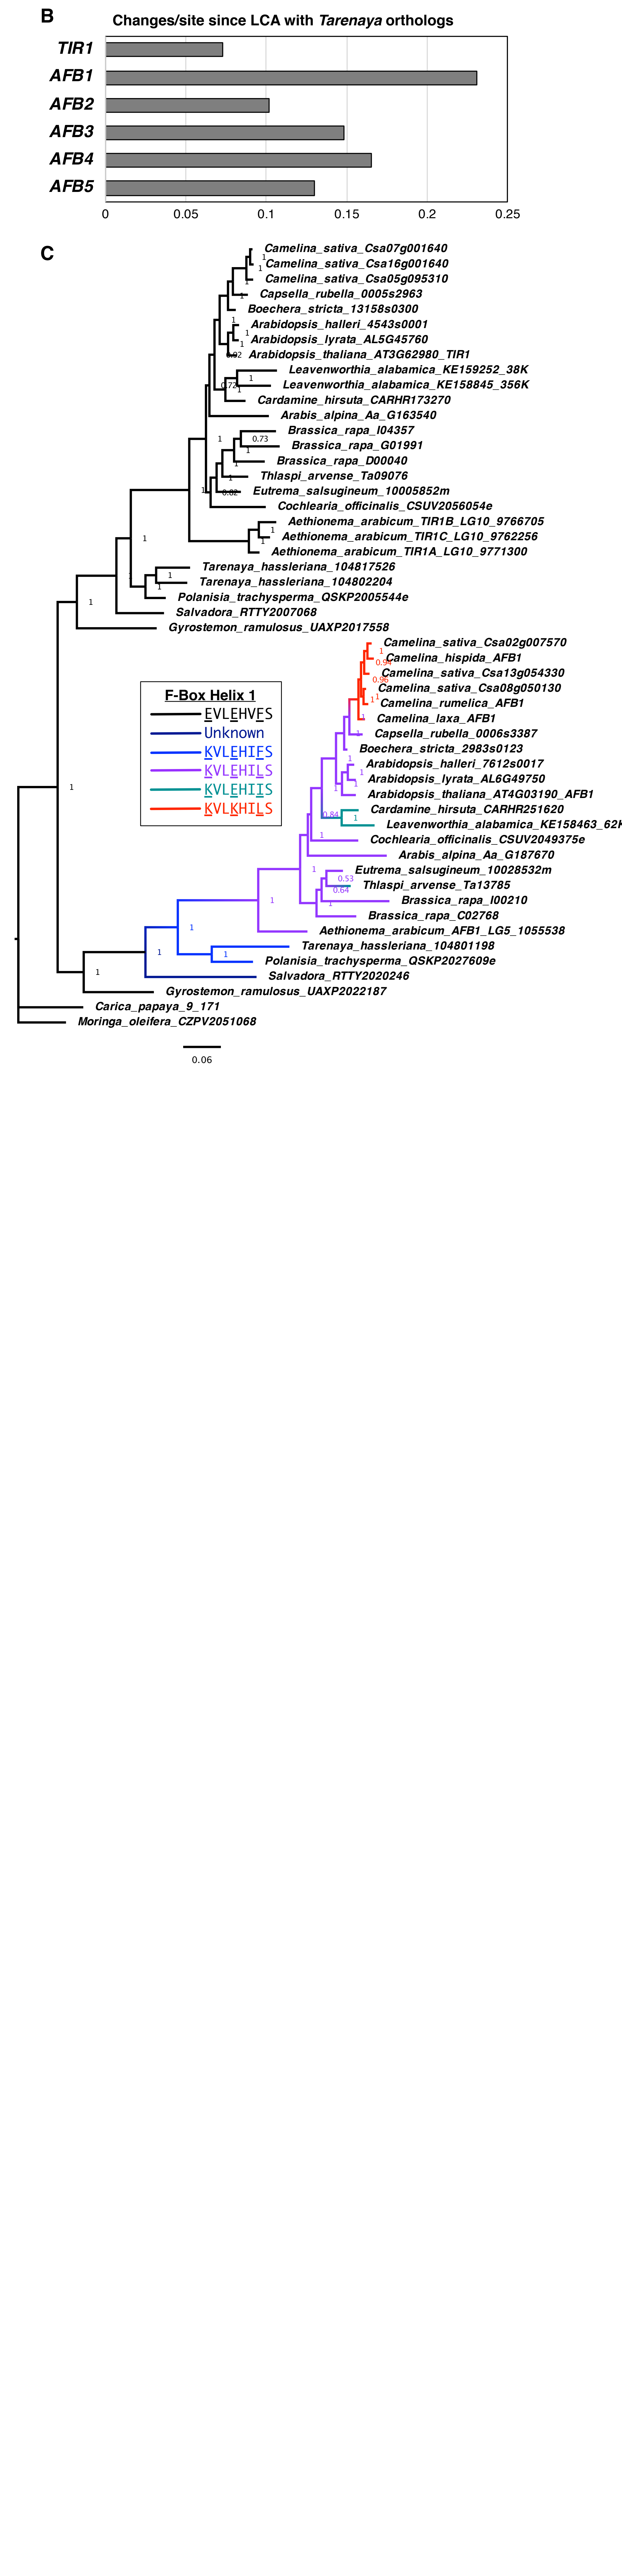

Supplement: supp [file elife-54740-supp-v1.zip]

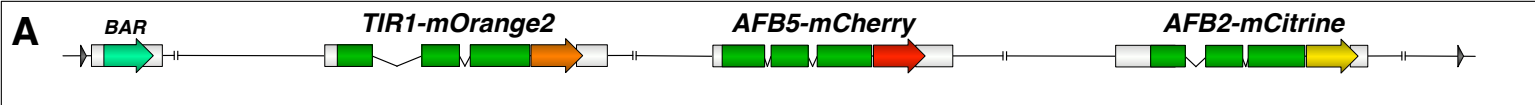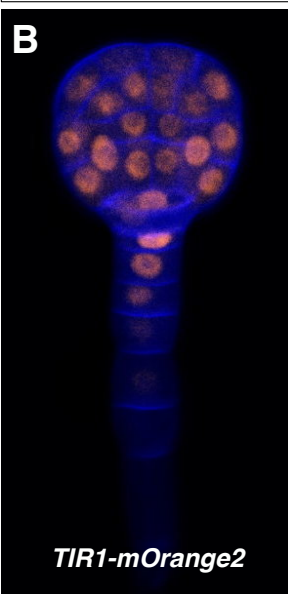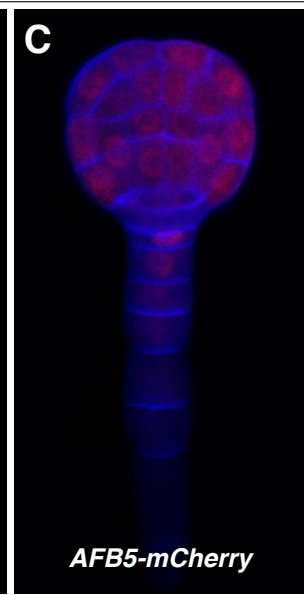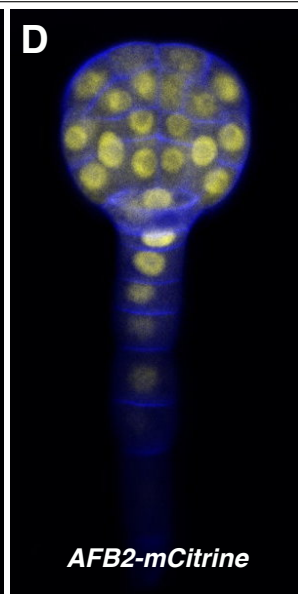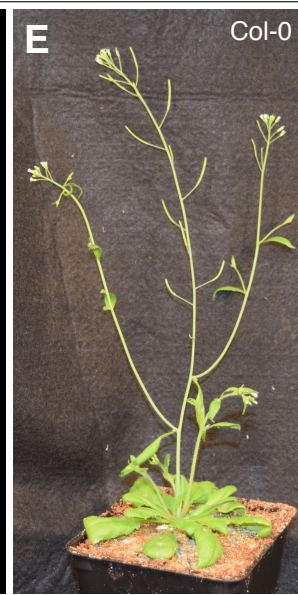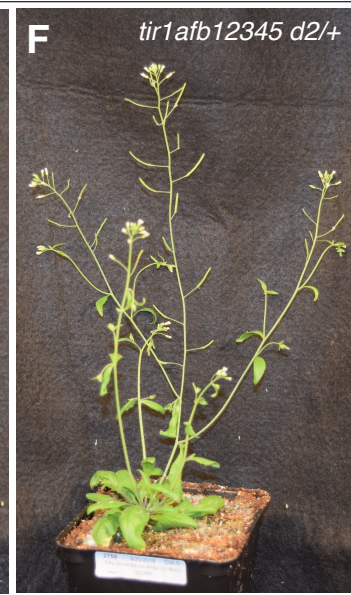

Supplement: supp [file elife-54740-supp-v1.zip]
